# Supplementary material for: Analysis of context-specific KRAS–effector (sub)complexes in Caco-2 cells
Source: Life Sci Alliance. 2023 Mar 9;6(5):e202201670. doi: 10.26508/lsa.202201670 (PMC9998658; doi:10.26508/lsa.202201670)
Supplement: Supplementary file 5 [file LSA-2022-01670_TableS2.xlsx]

## Sheet: raw_biolrepl_wide_excel
Table S2. Raw AP-MS LFQ intensity data with biological triplicates.
hgnc	12c_dmog_20_1	12c_dmog_20_2	12c_dmog_20_3	12c_dmog_200_1	12c_dmog_200_2	12c_dmog_200_3	12c_egf_20_1	12c_egf_20_2	12c_egf_20_3	12c_egf_200_1	12c_egf_200_2	12c_egf_200_3	12c_il6_20_1	12c_il6_20_2	12c_il6_20_3	12c_il6_200_1	12c_il6_200_2	12c_il6_200_3	12c_pge2_20_1	12c_pge2_20_2	12c_pge2_20_3	12c_pge2_200_1	12c_pge2_200_2	12c_pge2_200_3	12c_tnfa_20_1	12c_tnfa_20_2	12c_tnfa_20_3	12c_tnfa_200_1	12c_tnfa_200_2	12c_tnfa_200_3	12c_unstim_none_1	12c_unstim_none_2	12c_unstim_none_3	12d_dmog_20_1	12d_dmog_20_2	12d_dmog_20_3	12d_dmog_200_1	12d_dmog_200_2	12d_dmog_200_3	12d_egf_20_1	12d_egf_20_2	12d_egf_20_3	12d_egf_200_1	12d_egf_200_2	12d_egf_200_3	12d_il6_20_1	12d_il6_20_2	12d_il6_20_3	12d_il6_200_1
ABCB11	32132	3739.4	596.97	22733	10053.1	4572.85	10898.4	0	11183.5	2971.55	21004.5	7188.3	0	0	0	0	0	0	0	0	0	0	0	0	9317.65	15145	7695.3	0	0	0	0	0	0	0	0	0	9767.2	4244.95	3450.1	0	0	0	0	0	0	0	0	0	0
ABHD10	1133.21	11505	7750.15	2954.4	4266.05	7500.05	0	0	0	1415.65	0	2744.85	0	3437.55	1901.63	1194.21	2288.7	1051.69	0	1665.3	596.195	0	1844.9	1887.85	4870.9	3514.35	2128.8	2619.15	2480.2	3074.2	0	0	0	0	8342.25	9188.8	3139.8	6044.55	7107.35	3321	904.95	1757.6	3556.75	0	1571.9	2111.95	0	1208.96	0
ACAA1	670.58	4571.95	8297.05	2966.89	3355.3	7594.35	5246.4	0	2992.85	5358.8	97.091	7246.95	1259.7	8834.55	4418.7	4722.35	885.19	2429.9	1426.85	3830.15	3132.4	3606.65	5101.95	5682.4	7280.85	5400.25	4520.95	15769.5	8788.9	12195.5	0	0	0	1047.4	1053.4	7261.4	3574.2	3556.15	4201.25	4487.05	0	4548.6	5071	0	4044.8	5202.9	3406.9	4389	4020.05
ACAA2	19408	28849.5	25373.5	15246.5	41409	26480.5	15330.5	4737.75	7921.45	17433	6637.95	18635	6003.9	21350	15648.5	8519.1	10525.5	9718.65	0	0	0	4941.45	12766.5	9272.15	23914.5	20795.5	18573	15314.5	20901	19624	0	0	0	12918.5	33098.5	24946	19389.5	34247.5	32845	19757	9672.65	15078	16548	7869	13473.5	19869	7740.75	12701.5	17207.5
ACADVL	11454.5	17114.5	19023	10053.5	9663.15	15394	7532.5	2397.3	4090.15	3320.55	958.65	4788.25	12448.5	5337.25	7816.9	9513.25	2858.2	7348.8	4834.7	5158.3	4993.25	10026.5	3367.75	7483.9	20445	13952	9293.25	11798.5	8164.3	11540.5	0	13580	9491.35	7838.85	6357.2	17448.5	9310.1	7729.65	9062.6	9286.25	471.98	9146.5	9161.3	3211.2	9908.45	5547.9	9910.45	9023.25	4853.8
ACAT1	30416	33313	30124.5	31325	31030.5	34491	20885.5	24777	21167	18965.5	32869.5	17718	16484.5	27475.5	22489.5	19531	14404.5	16148	30914	12395	13471.5	34300	20709.5	18102	22990	20849	18205	23846	22306	23681.5	32680.5	27203.5	31110.5	20451	35765	22534	17267	44239.5	36234	21825.5	45540	24765.5	19424.5	19040	19939.5	30925.5	21599.5	25071.5	29331
ACOT13	18910.5	26633.5	20572.5	21122	31017.5	22896.5	0	0	0	0	0	0	0	0	0	0	0	0	0	0	0	0	0	0	0	0	0	0	0	0	0	0	0	17027	30093	12129	26963	27270	24131	0	0	0	0	0	0	0	0	0	16688
ACSL3	10190.8	33409	24721	5175.95	30614	22985	3959.85	5830.1	1921.4	7087.95	9746.25	7489.35	14210.5	3668	5759.75	12897.5	6600.4	9843.85	10855.4	3927.2	5923.25	16184.5	7018.15	7068.5	28939	17621	10303.6	26450	5797.85	15456	7819.05	12541.5	10982.1	4833	38888.5	29825	10490	27694	31803.5	10464	791.77	7355.15	7933.9	6807.7	5695.05	3473.75	10582	7058.35	844.69
ACSL5	3247.25	11628.5	3031.65	0	16187.5	5262.4	0	0	0	0	0	0	2368.3	4365.45	3120.85	3463.16	3194.3	4692.8	0	0	0	0	0	0	3458.35	1362.21	607.25	15981	311.33	1700.8	0	0	0	6926.1	14262.5	9802.1	2796	10111	10540.5	0	0	0	0	0	0	3012.95	1150.6	1187.21	900.425
ACTN1	469.59	1112.6	1030.36	1265.25	2372.3	2520.2	15155.5	66.7405	3829.35	27931	605.51	34908.5	557.865	1022.33	62.674	655.145	4533.1	1565.05	0	12895	10530.5	0	19767.5	17624.5	0	335.715	1305.3	1646.4	242.13	1207.37	0	0	0	0	3194.65	1924.65	0	8869.7	7444.9	14296	1040.56	9507.1	36274	49.84	23918	1221.85	752.115	893.285	112.629
ADAM10	584.15	8505.7	8716.95	711.85	3512.95	6900.7	981.67	0	905.335	0	0	0	2744.8	725.785	1750.92	4372.9	724.455	2640.95	0	0	0	0	241.02	603.385	7287.85	3950.75	1260.15	4132.15	895.695	2915	0	0	0	584.22	6653.05	10290.5	3357	1179.2	3034.4	1350.42	0	1256.05	845.885	0	880.45	0	0	0	0
AFDN	32768.5	58398.1	46290.8	13105	46232.8	38401.8	13010.5	2087.2	7980.45	3750.7	2312.85	5679.2	2077.25	2340.45	2159.45	1613.35	587.585	1342.05	43056	859.44	3723.1	56313.5	1957.21	3427.85	45815	17796.2	1409.1	27086.5	1932.4	13527.4	2019.4	1695.85	1573.6	15559.6	25309.1	23286.7	21291.5	21199.5	31150	14477	750.61	6911.55	7546.8	2892.2	4912.05	1238.9	1937.95	1866.65	907.175
AGPS	5772	19759	12724	4758.5	18691	17397.5	6520.4	1552.3	4006.05	15866	1346.65	11562.5	6453.5	3316.7	3691.85	3528.15	1155.85	2033.1	5758.25	3185.55	2806.1	7012.2	8752.05	6346.75	15575.5	9179.15	3194.9	13918	3013.95	8101.35	0	6175.95	4672.6	4215.55	30105.5	24478.5	9388.6	36275	43971.5	21255	835.59	13188.5	12318	1248.53	8348.9	2709	3834.6	2738.1	1864.2
AHCYL2	8327.9	18461.5	20482.5	6019.1	15357.5	17307.5	7655.05	10494.5	6499.65	12328	11853	0	0	3743.45	9010.35	3666.9	8891	4981.4	0	6820	7270.2	0	7643.6	13244.5	15545.5	9677.7	6114.55	14835.5	3151.95	8014.35	11527	8039	12002.5	0	12543	17654	9663	11019	3564.45	4431.3	7078.15	6831.85	8270.5	0	5487.9	0	0	0	0
AHNAK	1960.8	10613.5	16624	2514.7	28615	30249.5	23268.5	8601.05	14856	16561	58.4215	28244	291.61	1047.74	425.09	588.925	522.355	273.085	9.1899	41853	29333.5	0	24277.5	32983	485.975	1714.8	6984.9	225570	8520.65	102370	678.03	4232.65	2665	816.867	29164.5	43969	1404.73	41454.5	48873	23799	237.74	18339.5	22162	305.59	21443.5	881.61	9594.25	3752.8	2381.9
ALDH18A1	7729.85	13246.5	11002.5	11450	13897.5	13975.5	3451.8	20003.5	7064.3	12600.5	14967	14353	16703.5	34881.5	27286.5	19293	8819.7	15112	1761	10566	7924.25	3088.35	14789.5	11368.5	11028.5	25143.5	42448.5	10485.5	48554.5	31752	20596	6597.45	9696.2	4050.6	24172.5	19859	11892.5	23311	25469	10530.5	10841.5	9157.85	7290.35	14439.5	7831.05	37151	25629	28983	28381
ALDH3A2	2048.1	8545.6	15871.5	1333.8	8979.15	11753	2873.9	0	835.865	460.41	0	749.96	0	0	0	0	0	0	3317.8	154.886	419	3496.45	0	988.985	20033	8515.25	978.86	14324.5	223.84	6104.9	0	0	0	2111.85	6911	14060.5	5268.75	3387.35	2123.4	4975.6	0	4634.7	2340.75	0	3202.3	0	0	0	0
ALDH9A1	1579.46	2339.4	2956.85	5063.95	4352.25	4910.9	2864.85	0	1229.45	4915.25	1019.7	2801.75	4434.95	6445.35	4383.45	5923.75	3523.45	4026.75	0	4919.25	3956.2	0	7210.05	8376.2	0	0	0	0	7189.8	3217.95	0	0	0	0	4126.75	3786.2	2030.7	4524.15	3507.7	3250.4	1838.3	2080.6	2663.35	515.53	2176.65	7261.5	3355.45	3892.2	5905.35
ALDOA	197065	229855	213010	203270	221780	226835	126325	154315	110555	216955	182745	147520	0	0	0	0	0	0	180145	101842	111605	210845	155105	131230	0	0	0	0	0	0	241930	190335	212665	157270	222535	196650	155460	234115	195260	127840	164240	118855	151405	151800	138805	155150	174450	163045	147770
ALDOC	13889	70359.5	67923.5	17302	58478	65382.5	15499.5	6874.25	10575.4	2101.25	17000	9962.7	18333	25653.5	23352	35327	15392	26260.5	0	19731.5	10913.5	0	35828	25058	21223.5	17799	16592	20851	26732	27567.5	0	37555.5	12949.9	0	50221	57588	15710	35916	46657.5	12217.6	282.16	16443	26916.5	9702.4	22633.5	10583.1	29684	20359.5	9427.4
ALKBH5	604.03	2816.5	2269.75	787.71	3991.15	2522.2	0	0	0	0	0	0	830.66	1385.62	1107.91	1069.79	2542.6	500.105	4778.4	1717.75	1422.8	6360.7	801.585	415.03	1462.3	1755	1574.1	1486.15	1481.35	987.64	2571.35	843.23	1477.1	0	1983.45	1633.8	1751.2	1397.7	792.655	1670.2	0	789.5	875.545	0	1636.05	1767.1	1016.2	1013.46	2888.2
ALYREF	37280.5	38596.5	28785.5	0	0	0	0	0	0	0	0	0	0	0	0	0	0	0	0	0	0	0	0	0	45065	47823	48940	131040	46172.5	90188.5	66511	45032	44928	63102.5	27584.5	27151	55719.5	22254.5	30667	0	0	0	0	0	0	0	0	0	0
ANP32B	26545	68014.5	76962.5	25012	58886.5	64609	0	0	0	0	0	0	0	0	0	0	0	0	49599	28996	29779.5	0	0	0	90890.5	58178.5	20189	0	0	0	0	0	0	0	0	0	0	0	0	0	0	0	0	0	0	0	0	0	0
ANXA2	134110	94577	104165	120755	207165	203640	90283	214410	125955	130305	105415	108230	0	0	0	0	0	0	33297	301505	291285	46074	181795	176720	0	0	0	515275	60923.5	279870	0	0	0	147440	224605	249750	85455	306880	290515	141765	79420	129190	87116	81046.5	85289	0	0	0	0
AP1M2	209.73	1433.85	1099.4	0	0	0	0	0	0	0	0	0	0	0	0	0	0	0	0	1716.35	1011.99	0	1126.55	1460.6	0	0	0	761.875	1388.9	1802.7	0	0	0	0	2029.85	1597.65	0	1461.45	1695.55	0	0	0	2087.35	0	1422	0	0	0	0
ARAF	22472	8857.45	16850.5	11861.5	6688	10433.5	2521.95	4985.25	4235.5	0	3574.9	1271.59	6337.25	335.16	1332.35	1999.1	0	824.505	19597.5	160.845	2551.1	31980	224.12	1591.1	34116.5	12216	457.29	16979.5	550.415	8178.35	768.43	4648.75	6113.65	15413.9	6199.1	7673.25	16149.2	1176.87	3092.15	4483.2	0	3798.95	2074.75	5157.7	3828.35	0	3469.7	902.23	0
ARCN1	218655	168725	147615	277895	157790	171120	281230	271940	248340	262925	260670	254520	123650	344820	280900	0	0	0	84330	455800	397505	75445	344010	298385	0	0	0	63107.5	199990	132120	126805	90032.5	109390	321990	213370	208485	229770	118240	168085	314005	193330	247430	217390	298725	231635	283145	102710	192940	364400
ARHGAP28	3503.75	34928.5	31399	5358.8	23328.5	21883.5	4134.65	0	1593.4	5708.85	0	3705.55	0	0	0	0	0	0	0	0	0	14377.5	86.6345	199.02	27358	8717.5	456.56	18128.5	0	7075.55	0	0	0	10037.5	20993	20292.5	14736	11731.4	11847.5	6957.45	0	4853.8	4596.3	0	2580.55	0	0	0	0
ARID4B	5038.95	4227.85	6526.8	1514.7	2268.8	5713.6	2688.75	1907.05	1477.9	0	0	0	2893.55	5002.6	4510.4	2690.55	5782.25	3596.85	0	4065.95	2302.4	0	2077.4	4298.05	3106.85	5241.1	8216.65	2665.95	8934.75	6166.85	0	0	0	4513.3	4535.4	3297.45	3435.65	1671	1190.4	5660.95	0	3566.15	0	0	0	3484.05	3530.85	1998.7	1838.35
ARL6IP1	15416.5	38912	33814	14242.5	33689	26569	18872.5	6336.4	13567	4341.1	6972.6	5021.24	0	0	0	788.27	3910.6	1935.95	13730.2	0	9884.35	0	0	0	24485	15232.5	5884.95	8226.8	6917.5	10895	0	0	0	10499.1	35925.5	30385	12192.6	12002.5	22699	18499.5	4885.45	16323.5	17010.5	6658.95	16463	0	0	0	0
ARL6IP5	6133.6	9055.65	13834	12543	2072.3	5117.25	0	0	0	0	0	0	0	0	0	0	0	0	7014	1938.4	3791.8	17604	281.02	2720.9	22046.5	4546.65	7018.2	14700.5	3100.5	3802.6	0	0	0	5681.15	3487.05	7984.65	6771.9	0	3055.35	7087.65	0	11702	0	0	0	0	0	0	0
ARL8B	1575.8	4987.85	2387.5	479.225	4625.55	4490.4	2875.3	1036.2	1106	5705.4	0	2996.6	375.15	2363.05	1011.48	0	2631.5	1228.28	0	2249.1	751.72	0	4213.5	2347	2351.35	2410.15	4832.65	2890.4	3382.5	3419.05	0	0	0	0	10222.5	7756.65	0	14463	9890.5	6782.4	0	2174.1	4962.25	0	2004.65	0	0	0	0
ARMC8	1449	2855.45	3272.95	2672.2	3797.55	1555.45	0	0	0	481.41	0	1394.6	1830.8	6225.95	4605.75	3081	3392.95	3349.2	0	0	0	0	0	0	797.45	2665.15	3075.35	1312.7	3406.1	2626.75	0	0	0	0	3089.9	3205.6	4598.35	1460.35	2905.65	1364.85	1953.4	1711.85	1514.2	1280.3	1478.9	3544.15	3078.85	3772.7	3275.9
ARPC1A	2580.55	3125.4	1343.35	0	3459.85	1562.7	3414.9	2249.95	1738.69	51044	0	24824	3362.65	1424.1	1419.95	1758.95	1455.1	1403.6	0	9584.55	6560.5	0	11505.5	3689.5	422.28	4329	2113.8	0	3279.65	922.06	22863.2	7481.2	7799.7	0	10145.7	4269	1801.8	7361.25	4374.85	5922.05	3925.95	3906.55	19654.5	3350.4	9289.9	5848.1	6141.2	4672.2	4701.45
ARPC5	9113.9	5114.4	2449.8	4927.7	4561.1	1727.6	7001.4	7919.6	3068.4	42332.5	10258.5	4588	15219	16883	15624.5	12378.5	34989.5	24605	7413.75	17423	17771	6937.35	5541.7	8635.75	5917.7	18137	28389.5	11751	25988.5	20124.5	7622.3	15464.5	16128	2343.4	10077.5	3508.35	2556.75	7837.15	4288.55	2839.25	6728.5	7029.95	16614	6514.45	18181.5	20681	13700.5	15184.5	22070
ASPSCR1	4150.9	41.614	982.24	5906.75	0	1368	540.41	3850.8	1443.1	2154.45	1499.25	931.89	1956.75	17427.5	14505	3429.75	22560	11703.5	0	2323.3	1093.8	0	395.58	1899.05	890.005	5960.2	20803	0	18412	6688.85	0	3364.85	2020.35	0	0	0	0	0	0	0	7732.25	1774.58	408.065	3207.1	104.84	13333.5	2276.25	4196.35	10080.5
ATIC	671.635	7014.3	5319.75	2655.3	4679.55	5893.45	17547.5	0	6836	6910.25	0	9686.6	56.527	3376.15	1828.9	903.29	4295.2	2828.55	431.75	15962	11711.5	0	32412.5	27978.5	1101.79	2750.1	4335.95	1800.15	3576.05	3051	0	0	0	0	6961.7	7591.85	395.135	7421.5	9840.75	19721	281.217	12018	28567	536.31	20639.5	3397.05	149.865	894.8	1896
ATP2A2	1208.8	34729.5	23911.5	1197.55	30555.5	26067	2396.43	233.32	644.485	371.625	323.68	178.275	0	0	0	15.387	1226.95	246.52	6338.85	177.781	145.051	9624.95	1070.7	727.71	25259	11411	3228.3	51886.5	2020.55	24306.5	29.256	338.92	386.55	439.11	41587.5	40829	1333.55	23405	21323.5	2265.3	0	4415.15	2142.3	0	4068	0	0	0	0
ATP5F1B	3920.35	10705	6508.6	1522.55	57719.5	42112	17007	24298	15054	101223	74.402	75147.5	0	1290.35	691.665	1874.9	4084.75	2725.7	18536.5	12242	11755	17058.5	30317.5	24980	16026.5	13137.5	11241.5	329570	10375.6	164110	11338.7	10068.1	7174.5	0	69036.5	50174.5	351.835	123270	187255	42840.5	127.17	21986	22495	594.945	16077.5	2532.65	11887	7178	6637.7
ATP5F1C	320.93	2030	1891.3	0	10166	9880.5	0	0	0	10533.6	0	15244	0	0	0	0	0	0	0	0	0	0	2806.15	3216.4	1575.25	412.51	313.75	33316.5	935.945	15630.5	0	0	0	0	15411.5	18001	0	18670	34943.5	5983.05	0	4285.3	2352.8	0	3551.45	0	0	0	0
ATP5F1EP2	3964	882.6	3333.2	0	0	0	1034.64	10865	3558.65	0	0	0	5410.5	2533.95	3504.65	3931.2	2901	3628.85	0	0	0	0	0	0	2196.8	2580.3	2776.85	21180	2288.8	10681.5	4107.9	4422.85	5043.4	0	0	0	0	0	0	1211.8	2857.75	2427.8	1495.65	2156.3	1878.7	3689.4	7719.2	6540	3404.3
ATP6V1E1	37487.5	58367.5	33247.5	68698.5	37479.5	37057	27063.5	58680.5	92438	80079	63665.5	73885.5	66327.5	90335	69448.5	36907.5	89140	51743.5	49826.5	36463.5	41205	58597	38716.7	68923	50472	71032	90696.5	45387	57974	52819.5	42899	47431	52267.5	52396.5	70700	39035	52535.5	86658.5	67663.5	69027	38171.5	45213.5	82557	58582	56512.5	74739	32006.5	57609.5	78227
ATP6V1G1	2577	2634.35	2896.95	3242.6	4549.8	2684.25	1512.55	1558.5	1821.4	7495.3	2148.8	3434.85	2290.8	5435	4083.3	3079.7	6336.55	4360.35	0	4310.05	3055.65	0	7471.4	7483.8	2270.4	3764.9	5106.6	668.93	4119.55	3177.6	0	0	0	0	2232.3	2400	0	7643.75	2447.6	3184.7	1654.6	2342.2	5412.95	943.03	2271.1	3059.15	2935.6	2979.45	3433.9
ATXN2L	4366	16685.5	11168	4672.2	23334.5	16229	4279.5	3113.05	2663.1	10738.5	1660.35	5435.4	3005.65	7007.55	5486.45	4865	3522.95	4241.15	5965.35	3485.35	3534	3903	6731.45	4287.25	5044.1	6078.1	7570.45	15850	11987	16214	4607.1	3856.55	6217.05	0	16024	11088	1990.9	15786.5	13600	5431.5	2735.25	3592.85	5379.4	2208.85	3660.4	7626.75	4079.9	5519.8	5384.7
BAIAP2L1	2262.8	3184.35	2171.65	3027.6	1705.65	1283.62	0	0	0	3219.95	0	4441.4	0	0	0	0	0	0	0	0	0	1481.3	477.68	577.14	1179.9	815.615	474.385	792.45	593.67	812.065	0	0	0	3527.5	2094.8	1293.9	3463.4	1966.6	2508.45	1820.4	0	1115.78	2820.95	848.02	836.055	0	0	0	0
BRI3BP	2379.75	22122	14145.5	1923.7	15278.5	15787	0	0	0	0	0	0	0	0	0	0	0	0	0	0	0	0	0	0	16236.5	6074.65	0	13980.5	0	5603.75	0	0	0	5121	13040	14932	3356.3	3725	13129.5	0	0	0	0	0	0	0	0	0	0
BTF3	8011	11262.5	12474	4674.05	16253	13889.5	20833.5	4129.85	8685.1	26845	4710.15	14303.5	4479.7	4519.45	4490.75	6398.45	7043.45	6135.1	6627.3	8655.35	7481.8	8877.95	12352.5	12719	6083.9	4256.2	4451.35	8108.95	4409.75	5879.25	0	6352.4	4135.55	4876.95	10156.4	10311.5	4604.1	25333.5	11082.5	21235.5	5993.05	13073.5	18119	5972.75	14274.5	3159.1	4769.65	4671.5	3303.15
BUB3	33442	37690.5	26258.5	28641	28116	25400	7347.85	20422	10682	1655.6	46139.5	11562	25810	27301	24292.5	20558.5	16493.5	17554	26915	15955	15776.5	35272.5	18315	14170.5	35900.5	31905.5	25777	8129.45	27227	19468	21480.5	21555	20870.5	30718.5	31687.5	25299.5	37137	11205.4	25154	10378.5	32355	15454.5	8345.7	30633	10304.6	28343.5	13553	21204	19473
BUD31	1894.85	639.155	1854.6	1871.35	1984.8	1824.5	0	0	0	898.08	0	636.68	974.11	870.92	1897.4	0	0	0	0	0	0	0	411.71	526.095	1050.6	896.145	1066.6	523.665	1080.11	734.205	0	0	0	3879.2	1007.77	1183.63	3919.4	695.575	390.27	808.055	955.695	674.37	341.64	0	463.11	574.99	1005.13	1213.1	0
BZW1	3265.45	72722	77353.5	15633.5	53653	67386.5	0	0	0	0	0	0	0	0	0	0	0	0	49418.5	4597.6	8831.75	42372	5772.8	5537.15	103705	43534	2005.95	67390	943.07	32991	0	0	0	7414.85	56041	48450.5	20256	30067	34066.5	13513	0	13388	0	0	0	0	0	0	0
BZW2	9243.05	95522	83940	15617.5	92588	81278.5	0	0	0	0	0	0	0	0	0	0	0	0	49285	13800.5	12291	43661.5	10785	10395.3	101831	42855.5	2652.25	69289	4509.65	33513	0	0	0	18102.5	87809.5	83857	38259.5	53185	60574.5	24548.5	2041.55	18859	18916	4426.7	14696	0	0	0	0
CACYBP	18017.5	37566	32149	18635	43076	31603.5	34093.5	17445	25457	47848	16804	36837.5	0	0	0	0	0	0	14324.5	28798.5	23892.5	10837.5	32537	30144.5	16286.5	17447.5	19872	17296.5	20088	20184.5	0	0	0	10763.4	40020.5	29294	12618.5	49105	34360.5	39542.5	18399.5	28987	34247.5	19356	30201.5	0	0	0	0
CALD1	5809.1	3729.1	5172.65	3326.55	4699.05	4066.2	52384.5	9652.2	40937	121495	5479.2	131295	4418.1	6252.45	5173.1	4011.35	5391.6	4727.55	1060.5	18550.5	15288	1190.65	8005.4	7609.45	1669.8	4960.15	4914.85	9368.75	7317.95	8533.1	3242.3	4328.55	5055.75	3156	1834.55	2165.4	2930.7	6969	4730.9	51080.5	5732.9	39150.5	76158	8727.5	64065.5	6074.3	5191	6766.95	6003.95
CAPRIN1	19324.5	22795.5	19267	0	0	0	0	0	0	0	0	0	59339.5	8733.95	23385	39721	8033.5	25316.5	0	0	0	0	0	0	28769	20047	12728.5	0	0	0	20900.5	33900	41511	0	0	0	0	0	0	0	0	0	0	0	0	15873	28253.5	19016	7041.9
CBR1	549.8	2927.45	2963.8	572.755	1683.85	3293.55	9864.35	0	1539.6	796.4	0	1304.42	0	2946.95	759.25	1116.51	5571.45	816.36	0	9967.95	6138.4	171.42	8800.55	14902	475.785	443.585	2556.75	252.37	2177.95	1523.55	0	0	0	0	3431.15	3729.25	0	1258.26	3113.6	2345.15	0	7702.7	8089	128.54	12264.5	611.835	0	217.27	0
CBX3	3464.4	11613.5	5944.85	6662.85	11395.5	9022.95	19467.5	1486.6	7354.35	10988.8	6025.6	15934	2107.3	8114	5412.65	3309.8	14066	7313.05	0	29388	22303	0	65814.5	48524.5	3953.1	6078.85	9863.15	38896	10163.1	25182	0	0	0	0	10577	6461.5	0	18692.5	20092	14886.5	2753.1	8912.85	32334.5	0	25582.5	11269.5	4021.9	6226.25	11363.5
CCDC124	1912.7	3512.2	5063.75	1363.8	4649.15	5631.9	3978.55	0	1405.55	1850.1	0	1277.29	786.25	653.19	862.285	1362.65	0	901.165	7065.25	1400.5	1628.25	7793.3	2647.1	2254.05	4589.55	1999.8	824.39	0	0	0	0	0	0	3748.1	3633.35	3612.15	1976.6	2526.3	2462.05	6174.9	0	4039.9	3048.35	388.95	3106.85	0	0	0	0
CCNK	2145.95	5804.15	2469.25	810.92	3355.75	1583.3	0	0	0	0	0	0	0	0	0	732.29	792.285	432.615	0	0	0	5552.3	1422.95	586.905	3956.2	3079.35	1727.95	2112.2	2005.1	2074.55	4214.75	1423.25	0	0	3185	1514.5	4065.9	3095.65	2088.3	0	0	0	0	0	0	0	0	0	0
CCT3	53366.5	49302	54343	44171.5	58864	59277.5	39021.5	42644.5	35885	53381.5	46375.5	33801	38844.5	60933	52213.5	0	0	0	0	0	0	0	0	0	49929.5	44834.5	38765.5	36137	46988	44505	0	0	0	33535	50314	51196.5	52631	57897.5	50026	51911	62392.5	46286	42382.5	53357	39513	52137	45702	47858	57066.5
CCT4	80606	68257	61519.5	63572.5	79507.5	69766.5	45148	56688	41584.5	0	0	0	52437.5	67381	56503	0	0	0	0	0	0	0	0	0	0	0	0	0	0	0	66350.5	62046	57763.5	58660.5	81268.5	59475.5	71456	58801	67863	54683	94623.5	53227.5	48958	73294	45211	69502.5	53669	54681.5	81117.5
CCT5	47230.5	45664	38932.5	54538.5	58293	51209	20498.5	41748	25614	0	0	0	36203	66842	58174.5	44109.5	185610	109580	0	0	0	0	0	0	41389.5	100765	139160	16135.5	84759.5	55063	0	0	0	30784	54532	40509	60447.5	39182	44482.5	31442	66877.5	30851	23856	47766.5	26934.5	80731	43542.5	56982.5	65639.5
CCT7	67056	36573	49051.5	54361	36827.5	43314	28012	51999	36348.5	0	0	0	54860.5	65274.5	58476.5	56529.5	27379	39707.5	0	0	0	0	0	0	60339	45944.5	31404	38057	47059	40735	62128	61956	57696	46983.5	35950.5	44014.5	0	0	0	31412.5	88491	38653	23143.5	65015	29534.5	61475	61407.5	55619.5	69260.5
CCT8	77715	44692	52500.5	60494.5	48037	61296.5	57307	69344	55446	0	0	0	77172.5	87961	84482	0	0	0	39767	46443	42481.5	0	0	0	0	0	0	0	0	0	76926.5	83286.5	91618	0	0	0	0	0	0	63484	106415	56279.5	54543	85199.5	56856	81778.5	77205.5	78363.5	98571.5
CDC37	1609.35	6003.75	2490.3	3875.9	5693.75	3644.2	1583.4	1102.35	2325.95	6098.9	2805	4580.35	3368.1	4813.55	3449.25	2170.9	8125.8	5120.4	0	12077.4	5540.9	0	12909	12804	5633.3	10036.1	10337.1	1294.9	6277.9	3499.75	0	0	0	0	6837.65	3393.4	816.6	7535	5744.1	1844.4	1242.15	1000.89	7620.1	1403.45	4386	3450.1	1662.9	4450.95	6208.9
CDC42	1196.2	6082.3	3294.4	4167.2	7000.25	9788.65	20571	3634.35	9923.9	17816	2582.65	13023.5	0	3766.6	1540.03	0	0	0	3326.15	10287.1	6433.8	6144.75	18578	11425.5	4824.75	4473.6	4087.85	18173.5	4310.65	10670.5	0	0	0	3471.8	12758.5	7481.2	3618.4	20010	18226	21717.5	1622.75	16083.5	26638.5	1387.2	14496.5	5817.55	0	2829.05	4839.2
CDC5L	1435.9	2555.2	2058.3	0	1674.22	1080.55	0	0	0	0	0	0	571.99	575.305	860.27	1240.9	99.681	654.09	0	0	0	6051	0	894.315	3846.85	860.92	1415.67	2625.1	1163.72	1572.75	0	0	0	1505.8	2709.05	1252.8	9748.3	1882.5	1310.6	0	0	0	0	0	0	0	956.135	419.52	0
CDC73	26977	15393	12496.5	16158	19577.5	17934	329.99	12689.5	1931.1	802.875	14117	1703.8	6300.9	7836.6	6734.7	4758.7	5803.9	5084.75	12377.5	3842.55	4255.25	17375.5	2797.55	2951	5721.5	6624.6	8591.5	5740.9	9012.75	8233.85	1129.02	7859.7	9757.8	20963	8954.9	10307.8	16219.5	7770.35	10858.5	2034.55	18156.5	4617.45	281.215	12741	1549.5	9326.95	8175.15	7621.85	8978.7
CEP164	1795.3	1121.89	1415.3	9629.7	3128.3	4258.05	4600.4	3049.35	4939.4	5023.15	1248.81	2687.2	0	0	0	0	0	0	0	15037.5	11684.5	0	12704.5	10953.5	0	0	0	1423	2774.45	1459.94	0	0	0	946.14	2501.25	2831.05	2368.3	3265.8	2768.05	5007.35	1338.2	4996.7	6293.5	3973.5	7273.65	0	0	0	3602.65
CFAP20	13435	1357.4	13801	10580	4985	4956.05	2099.72	3817.05	3258.2	0	15907.5	2913.1	8567.4	9001.6	10328.6	6513.65	3479.35	5449.7	5298.1	9486.6	6959.9	4600.1	4837.3	9941.9	15615	11723.5	7112.05	2475.7	9056.8	7297.85	4108.75	5210.95	6912.45	23631.5	0	7833.6	0	0	0	2196.5	10104.1	6429.85	2651.85	11230.5	5681.55	9546.05	4580.5	7520.15	4872.2
CHID1	2372.2	2210.35	2576.5	2259	3427.05	1881.1	0	0	0	266.825	0	685.835	2697.2	3043.2	2866	0	0	0	0	0	0	0	0	0	0	0	0	0	0	0	0	0	0	0	3620.1	3924.25	0	847.62	1770.75	0	0	0	0	0	0	0	0	0	0
CIRBP	33696	27938.5	29491	28129.5	32853	24560	0	0	0	0	0	0	0	0	0	0	0	0	0	0	0	0	0	0	0	0	0	0	0	0	35584	32211	33452	0	0	0	0	0	0	0	0	0	0	0	0	0	0	0	0
CISD2	2124.3	9373	6835.5	422.1	4289.05	5401.95	0	0	0	769.8	0	990.21	0	0	0	0	0	0	1943.6	955.36	554.26	3967.35	1155.2	701.815	13312.5	5605.95	445.88	10962	0	5056.55	0	0	0	5386.3	8809.15	10824	2837.85	2102.05	2552.4	0	0	0	0	0	0	0	0	0	0
CKAP5	1653.4	5948.8	4782.7	1629.45	7518.65	5947.75	7069.25	231.06	5420.5	9885.15	0	8507.3	5606.05	12611.5	8765.7	4345.7	20347	8347.2	0	8081.9	5953.45	3378.6	13367.5	13507	7263.4	16163.5	24525.5	6386.15	16453.5	15676.5	0	0	0	0	10162.6	5649.1	6826.65	10072.1	8463.55	10411.9	0	6142.7	7064.35	2413.4	5419.5	7622.3	4479.7	6137.65	8964.05
CLPB	877.57	2647.2	1656.25	789.94	6365.1	2723.95	0	0	0	0	0	0	1083.31	762.79	811.125	1812.5	0	1039.54	0	0	0	0	0	0	1756.75	1508.25	0	582.17	849.38	510.33	0	0	0	0	0	0	0	0	0	0	0	0	0	0	0	1101.44	1083.99	1045	0
CNP	1478.75	4356.85	6642.45	1673.85	4113.1	4281.1	706.975	0	181.89	661.935	0	1494.29	323.85	913.67	817.495	1344.78	0	729.145	875.87	1428.1	1017.38	2052.7	2357.45	1650.35	4423.8	2226.35	1459.9	2995.95	1991.65	2823.1	0	0	0	1795.75	6263.35	6389.55	4130.1	3448.4	5170.3	1963.85	0	1285.05	923.975	0	628.915	528.96	602.955	291.375	0
COPB1	204110	121470	125655	275550	122160	154705	304385	274665	237890	235590	249730	259880	127455	366035	282985	0	0	0	72607	468090	404690	59208.5	260720	274555	0	0	0	74754.5	207945	144475	154475	106575	97428	347610	184775	197485	244000	112865	129410	298170	179225	260420	196480	303250	223385	264175	104535	173685	376955
COPE	133070	175690	162855	191185	146860	166075	349325	175540	227540	401320	226815	370420	117665	366260	289570	0	0	0	107225	417620	360410	71224	319020	278180	0	0	0	75058	225310	159525	0	0	0	204685	202400	220610	154315	166990	149805	338925	163685	243570	247720	252290	245735	288130	94986.5	185040	329515
COPG1	270000	162755	168075	376140	167400	188415	394040	388440	345275	220170	349405	313940	159110	478275	386265	0	0	0	118710	546400	514840	91648.5	364005	334375	0	0	0	95584	274425	190355	0	0	0	479520	256095	244525	321860	177840	188430	403300	270025	325750	262530	372870	277635	403265	127750	247385	546930
COPS4	2890.25	5449.9	7655.55	3434.2	5941.95	7960.1	4044.05	0	1363.4	2591.25	0	4009.75	14035.5	3505.1	6282.45	4280.3	4845.25	5837.5	0	6575	2433.45	0	11036.5	10529.6	905.22	2121.4	5315.35	2196.85	7616.5	6123.05	0	0	0	0	6586.7	7246.95	3246.9	4652.35	7170.3	9561.45	0	7122.8	5242.8	786.93	6560.35	4134.15	14912.5	12242.6	2521.8
CPSF6	335.83	22357	15062.5	2539.8	6403.05	7115.6	0	0	0	692.61	0	922.72	2630.1	4401.35	4143.55	2031.65	3241.1	1040.99	10276	1929.6	2995.8	10171.6	561.915	2728.8	19206	11327	5179.6	9015	6853.1	7027.7	3140.65	4517.45	2019.1	2592.25	15349	7647.55	11967.8	6544.65	5847.35	220.28	2967.2	2215.1	0	0	0	3532.2	2239	2900.9	1311.58
CPSF7	659.08	8296.7	6967.65	1668.7	6224.8	4038.8	0	0	0	1538.15	3363.8	1394.95	1195.5	4028.95	3178.85	2298.4	2007.5	1953.9	1869.35	1376.95	1518.6	6039.85	2101.5	1439.85	3730.95	4738.55	5052.8	2931.4	5084.95	5569.85	0	2112.45	1256.6	607.96	6384.1	4835.05	6680.15	4753.55	4814.5	525.93	3434.25	1217.15	396.82	1175.7	582.03	2687.75	1770.3	1904.15	0
CRYBG2	1964.02	1770.25	495.805	3844.9	2439.3	4880.2	7788.6	0	3366	25932.5	3514.35	22367.5	3085.3	440.835	0	0	0	0	0	4092.5	2686.2	0	3152.5	1127.51	0	0	0	0	0	0	0	596.64	2315.05	0	508.219	2487.65	0	188.93	2152.5	7306.65	0	7331.55	12718.5	0	5601.6	0	0	0	0
CS	591485	540795	642645	700310	416315	579790	457970	636825	459925	0	0	0	859585	648475	709165	639055	980300	858100	542505	654930	701895	726735	380735	423495	1004720	986795	993125	497875	749235	603715	861780	506595	592265	842190	360230	642420	0	0	0	441545	484890	485685	332400	686355	429135	786155	457710	587890	1010475
CSNK1A1	11098.5	11351	9856.8	9700.65	8063.55	9923.15	6703.65	3188.35	4772.45	482.08	8808.85	3971.3	5706.9	10638.5	9324.65	5427.75	7412.15	6497.05	5847.45	9134.4	7729.05	6825.65	5602.3	6636.55	8795.3	10615	11642.5	4723.35	12751.5	8848.7	5437.8	4980.55	4897.85	15705.5	10425.1	12084.5	20863.5	4823.4	8462.5	7703.7	8437.05	7549.3	5172.35	7562.45	6774.7	10327.5	4515.95	6401.6	8915.05
CSNK1D	1297.35	2517.25	708.13	0	4768.7	1412.2	0	0	0	0	0	0	1200.7	1438.4	1453.75	977.13	1350.55	837.56	0	0	0	0	0	0	1861.5	675.8	1188.38	775.1	2749.1	2359.15	0	0	0	6001.6	2413.1	2163.4	0	0	0	0	0	0	0	0	0	0	0	0	0
CSNK2A1	5899.2	32983.5	25837	0	0	0	0	0	0	0	0	0	0	0	0	0	0	0	0	0	0	0	0	0	0	0	0	0	0	0	0	0	0	0	0	0	0	0	0	0	0	0	0	0	0	0	0	0	0
CSNK2A2	6870.5	34130.5	21862	6091.75	31026	21512	0	0	0	0	0	0	0	0	0	0	0	0	0	0	0	0	0	0	0	0	0	0	0	0	0	0	0	8421.75	29271.5	22132	12291.4	15637	17683	0	0	0	0	0	0	0	0	0	0
CSNK2B	3049.8	8356.25	6858.1	2031.45	4879.15	3510.4	1041.02	0	620.42	4330.7	910.54	2024.1	5023.3	1849.25	1812.1	3413.2	2580.25	2887.85	1250.73	1433.15	2260.85	890.37	3829.65	1798.4	14056.5	5391.4	1548.4	8827	2119.9	4174.9	0	3471.1	3581.3	2385.85	5301.8	3153.8	6018.25	5969.75	2359.15	2332.25	1082.45	382.75	1383.1	3011.85	605.03	2388.05	2998.5	2537	2681.4
CSTF3	6137.55	8744.85	15900.5	2678.9	6284.6	6483.95	7549.85	3484.2	2615.1	0	0	0	6168.75	7562.2	5544.05	6296.15	12515.9	9527.1	2016.4	2347.2	2671.25	5560.4	895.4	1479.45	10219.5	16666	20041	7388.35	17551.5	15332.5	0	6499.55	6926.75	3821.8	6681.3	6239.65	7528.95	3886.6	5039.45	0	7756.15	6526.65	764.58	4429.15	7849.95	7836.5	6636.55	8351.65	5818.2
CTNNA1	4275.6	6372.45	5560.5	4781.9	10565	11109	7099.1	757.27	4539	7973.3	1554.5	5715.7	4501.5	5883.9	5910.3	5983.1	5894.4	5279.35	1077	20389	15153.5	1371.4	26307.5	22574	8422.5	7348.75	6845.95	19158.5	5589.3	12146.5	1125.75	5054.05	3968.15	918.09	10957.1	12117	4875.6	20486.5	18592.5	11764	2606.85	10784.5	12563	1206.96	7978.05	5982.95	5405.6	5521.3	4896
CTNNB1	2765.95	1400	1365.97	1397.1	2888.5	4138.35	2963.55	0	1118.88	5299	0	3692.95	3173.8	3224.75	2679.05	1254.86	2388.65	2682.85	1085.7	5510.9	4557.7	633.14	12035.5	10483	2230.4	2287.35	2701.65	6920.4	2337.7	4247.45	0	2848	3183.2	926.95	4038.65	6325.4	2446.7	6075.05	6378.3	5988.65	1752.4	3173.6	4439.5	1269.45	3392.5	3239.4	1894.35	3815.35	2978.5
CTNND1	15890	7452.7	9222.6	10218.1	13534.1	12037.5	5194.85	6664.8	4331.8	9734.7	8802.05	11866.5	10414.5	9413.1	9845.05	9473.95	4868.25	7060.75	15201	14095	13378	17825.5	21210	14661	13513.5	10601.5	7818.85	14097	9968.65	12385.5	10238.6	10711	11892	16397	14962.5	13100	17566.5	20207	19791	10001.1	8513.25	8701.45	5872.65	6722	5253.75	8261.25	9909.55	9517.5	7604.5
CTSA	1247.4	1179.7	1950.25	3709.1	1330.85	3140.3	10369	0	7308.4	6001.05	0	3797.15	5057.8	2489.75	2194.2	1819.72	4059.15	5308.75	0	5702.55	5679.65	0	10518.5	10340	3791.9	4912.75	3673.65	8415.4	2038.4	5926.5	0	0	0	0	1273.8	3404.5	2897.1	2136	3543.7	6145.4	0	8930.4	14311.5	0	10354.5	5852.2	4035.2	2975.8	4681
CTSB	1051.27	27548	18871	2683.45	17551	14783.5	10541.5	0	7850.55	14384	0	9823.25	0	2209.25	1400	1398.1	2743.6	1712.3	12024	6891	7624.15	13766.5	11971	13411.5	17110.5	8398.6	2398.25	13377	1849.95	8187.7	0	0	0	0	18248	15525.5	3695.3	16951.5	11969.5	6625.25	0	6579.25	11000.5	1653.75	8686.95	2076.45	0	1390.35	1865
CWC27	2672.9	4917.1	14966.5	0	0	0	0	0	0	0	0	0	0	0	0	0	0	0	5180.4	1768.02	925.28	5596.4	380.87	1012.6	6503.25	2003.1	576.64	3981.05	485.9	1216.25	0	0	0	0	581.395	13560.9	6049.55	0	803.615	1070.65	0	437.823	747.59	0	994.44	0	0	0	0
CWF19L1	5500.3	7760.75	5287.05	0	6367.85	5205.1	0	0	0	0	0	0	4316.2	2826.4	3022.75	3759.6	2265.47	4170.2	0	0	0	1836.9	2581.3	2829.25	2760.9	3142.45	2830.6	0	4107.45	2855.9	0	0	0	4284	10778	9248.65	3477.8	4729.9	4598.9	0	0	0	0	0	0	2993.4	3353.35	2083.3	2866
DAP3	3334.45	4384.05	3115.2	936.885	5531.5	5148.6	987.6	2725.25	1334.65	3049.5	2186.05	2772.5	2374.65	5429.3	3866.35	3204.75	964.475	2225.15	0	0	0	0	587.805	629.92	1347.4	2780.2	3728.1	19307	5337.3	15048.5	0	2231.05	2786.05	0	7493.5	6414.25	1184.34	10045.1	14011.5	2571.1	1797.9	2321	1240.15	3375.9	1301.1	4239.7	5310.35	5112.15	3072.15
DARS1	1060.58	19439.5	15037.5	1348.35	11725	15668.5	14536.5	0	3352.4	5055.55	0	5917.2	504.075	3084.1	2123.1	1460.11	16621	5977.55	2335.4	12338.5	7303.55	874.19	20592.5	20825	8966.45	6921.9	6203.8	5718.7	2981.25	3826.3	0	0	0	0	12615.5	16703	2001.55	11115.5	9670.7	12989.4	313.72	12533.5	20039.5	883.29	12542	1656.7	518.18	616.17	850.17
DARS2	744.98	1434.5	4222.35	764.395	895.645	4487.85	0	0	0	1444.3	143.74	743.655	818.34	895.155	1069.95	0	0	0	1596.6	618.685	616.39	980.175	191.08	947.84	4447.35	1256.67	372.72	2742	1169.45	1502.7	0	0	0	0	2165.5	3361.45	1120.39	2136.35	1424.6	763.315	0	1051.95	297.6	0	787.265	0	889.9	328.44	0
DAZAP1	3246.7	170.47	2483.75	0	1053.93	2175.35	0	0	0	291.3	2113.5	460.55	0	0	0	0	4047.8	795.355	0	0	0	0	1898.65	1151.45	528.94	3248.4	4369.1	12341.5	6467.75	9039.35	0	0	0	0	0	0	0	840.135	689.135	0	0	0	0	0	0	644.76	2606.05	1653.1	0
DCAF7	1610.4	8029.65	5559	2665.85	5093.55	6350.25	1696.1	862.18	679.89	0	3430.75	3321.6	2779.65	3430.45	3058.55	2593.35	2500.75	2567.8	0	4424.1	3149.6	843.04	3130.9	3520.9	3266.4	3677.25	4515.75	2980.75	5034.05	4399.55	0	0	0	0	6370.3	6877.75	4587.4	1848	5486.35	2306.15	1552.95	2700.35	2014.15	2325.2	2355.1	2556.15	1367.75	1989.65	1730.25
DDB1	21691	29002	26363.5	25576.5	35765	30481.5	18046	15814.5	15044	17956	21897.5	18919	18322.5	24901	22359.5	20610	27642	22205	19423	15928.5	14955.5	0	0	0	22938.5	24824	28266.5	0	0	0	0	0	0	13239.5	34875	27699	20649.5	34557.5	28092	18095.5	21327	17768	17399.5	20941.5	15716	24259	16518	19202.5	23100
DDX1	10018	7989.8	9368.35	6045	3381.9	3248.7	0	0	0	305.61	2346.4	988.465	7094.9	3509.6	3420.05	5959.7	2360	4586.55	8933.5	392.795	1309.2	10792.5	2006.75	2118.7	8749.3	6522.25	4157.45	3137.6	5045.8	4406.1	3210.05	9321	6747.15	8625.35	4854.35	4643.1	13411.5	3811.25	4032.35	1444.85	4028.9	2582.65	1405.7	1484.45	357.79	3739.9	4261.8	3457	1108.36
DDX18	3168.65	6282.55	2051.55	7493.1	2877.3	5055.6	0	0	0	435.49	2432.95	884.525	6950.3	2458.7	4770.5	3812.85	2951.85	1893.4	0	1757.45	980.025	0	0	0	4250.2	4926.75	4177.65	5210.75	3248.75	2889	0	0	0	4733.7	3716	2906.25	4545.75	3294.25	2469.8	0	0	0	0	0	0	1337.5	5707.4	7747.2	1451.7
DDX21	11866	28660	21967	5542.4	17322	20305	0	0	0	0	0	0	0	0	0	10959.5	9034.7	10552.5	24098.5	4556.75	6704.25	31240	3094.8	7686.05	39472	25182.5	13143.5	38935.5	8131.45	23109.5	0	0	0	12783	11669.5	15782.5	15182	4380.6	10203.7	0	0	0	0	0	0	0	0	0	0
DDX23	2602.95	1768.45	1945.8	44.269	2003.45	723.19	0	0	0	0	0	0	9146.7	3161.5	5483.4	6532.75	966.42	3367.6	0	0	0	1332.34	82.823	392.85	4053.75	4169.7	3137.85	736.62	7183.6	3298.4	2452.1	4704.2	5669.25	1000.7	2792.65	1901.1	3365.1	3168.65	1422.3	2031.2	242.35	47.535	0	0	0	2959.65	17282	11137.5	1405.05
DDX39B	2162.3	2485.6	2940.8	2288.55	2372.2	2550	3388.1	0	1250.62	2363.05	1304.7	2676.4	3123.45	6677.3	4648.2	3014	4738.75	3969.85	0	6275.65	3287.95	0	9107.65	6167.55	4492.7	4984.5	5513.6	15692.5	6353.7	10958.6	0	0	0	0	2173.1	2017.25	3236.5	4246.6	4472.65	5578.6	3031.3	2097.4	6907	3354.1	5094.95	3756.8	2609	3666.2	3871.65
DDX47	3183.7	612.35	1406.45	3484.55	637.18	517.855	0	0	0	331.225	3126.65	0	6331.75	1362.4	3570.55	6298.4	1599	4417.1	11982.6	719.285	2013.5	6479.3	563.885	531.1	4899.5	3520.4	3241.4	2135.55	1498.28	2693.8	3001.25	5475.6	6671.05	3299.2	646.685	998.325	5657.25	487.595	548.315	530.925	2982.4	886.515	464.375	1378	206.49	2373.6	4129.05	4103.65	0
DDX56	3033.95	1854.8	3474.75	1348.7	1894.67	3125.35	0	1623.25	815.665	0	0	0	4952.8	1399.45	2668	3944.75	1503.8	2691.75	1337.31	252.96	451.775	3352.25	0	741.85	2324.55	2869.65	2455.7	2133.3	1536.75	1889.35	2557.2	6325.9	6501.6	2754.3	2553.9	2690.45	3463.3	3663.35	654.981	0	2150.1	708.75	0	0	0	1356	5057.25	3844.7	1659.85
DHCR24	314.005	23809	16154.5	194.16	12736	15539	0	0	0	2145.1	1844.05	361.63	3546.7	410.24	827.135	1294.82	0	213.11	286.04	127.05	534.89	1967.2	54.779	663.13	18144	4453.9	332.425	20836	1065.44	7724.15	0	0	0	0	14720.5	23747.5	1169.3	7682.4	9443.55	4237.25	0	1374.45	1531.6	6445.9	316.755	2594.96	1082.99	604.315	707.79
DHX15	11379.5	17978.5	12197	0	0	0	0	0	0	0	0	0	0	0	0	0	0	0	0	0	0	16326.5	14341.5	10292	0	0	0	0	0	0	14115.5	14124.5	18002.5	14476.5	15637	11367	17984	13243	13709.5	0	0	0	0	0	0	0	0	0	0
DHX9	3684.95	19999	14415.5	1251.34	20963	16625.5	0	0	0	0	0	0	0	0	0	0	0	0	0	0	0	0	0	0	0	0	0	0	0	0	0	0	0	0	0	0	4145.3	11587.5	11023.5	0	0	0	0	0	0	0	0	0	0
DNAJA1	17183	43305	34553.5	24384	41945	35387	0	0	0	20359	9321.65	18022	9465.9	26244.5	20285	10583.5	30530.5	17653.5	0	0	0	0	0	0	38897.5	34737	30978	22294	31458	27353.5	0	0	0	17238	55124	47325	24458.5	35684	33208.5	0	0	0	0	0	0	0	0	0	0
DNAJC7	2035.35	4449.1	6163.2	3428.6	6124.55	5145.75	4605.85	0	2515.2	1635.75	326.85	3450.8	1680.12	4391.85	4570	5118	5439.85	5065.45	0	4780.8	3425.3	0	6802.1	5845.25	3654.95	4104.8	4829.45	2926.55	5126.45	4595.35	0	3282	2443.7	0	7924.05	6781.8	2513.75	4814.9	6536.1	5413.1	2811.8	5095.1	6331.6	1111.25	5084.4	4218.65	4761	4856.25	1636.4
DNAJC8	12948.5	9250.7	9008.75	6373.5	5514.35	4937.55	0	0	0	0	18874.5	979.05	7467.6	1841	5576.2	5884.2	523.65	1771.25	11484	0	843	23541.5	1192.01	289.99	7336.95	4269.3	1644.55	445.99	2187.75	819.54	9774.65	3523.65	8205.05	17449.5	8555.05	6530.15	11591.5	1121.88	5521.65	222.69	9243.2	909.985	0	0	0	1573.49	2197.3	1869.5	1383.65
DOCK7	649.305	104.969	125.66	698.785	174.205	291.53	9861.6	0	3310.6	18444.5	0	17348	2661.65	3295.4	3300.25	3039.25	909.64	1787.3	0	2940.5	824.14	0	4866.1	1711.75	0	372.92	1415.7	0	3201.5	538.9	0	0	0	0	241.12	245.395	356.84	458.64	532.435	17586.5	0	9080.7	6956	0	3088.3	1121.18	5550.1	3237.2	616.875
DPP4	1292.8	2465.05	4629.45	445.92	5066.1	7029.35	11498.5	4000.4	4003.95	3616.7	0	10856	5825.6	1681.1	2191.55	2778.65	3864.22	931.92	1702.5	31128.5	25329	1981.55	34013.5	44057	13048.5	4548.65	753.76	22637.5	793.475	11322	0	6571.05	3176	3565.7	6627.85	12439.5	5468.7	7859.45	20767	14170.5	4546.9	15428.5	10415.5	3937.95	8411.1	668.145	2481.35	2841.86	319.91
DPYSL2	34582	9358.85	4050.75	13686	18727	29003	102380	66634	45621	13489.5	59623	53672	0	0	0	72917	19133	44240	17865	92711	85729	38972	234605	184020	38884.5	5106.95	5100.1	23115	0	14465.5	80603	3247.9	16226.5	37484	25120.5	20993	55441	14120	71468.5	112645	49061.5	72278	190780	18760.5	120430	10648.5	29931	39868.5	28135
DTD1	1389.9	5317.7	4431	3491.3	5393.95	4093.1	2816.15	0	2333.2	4209.15	0	6333.4	0	0	0	643.26	794.005	748.96	636.72	955.025	755.37	1509.4	2185.3	1512.8	0	0	0	676.055	557.02	965.425	9506.2	2394.9	12614.5	2586.5	5293.85	3716.5	1772.8	4315.2	4755.1	3656.2	791.91	2924.25	3167.25	0	1997.4	0	0	0	0
EDF1	13200	20603	12164	7740.45	25790	18188	0	0	0	0	0	0	0	0	0	0	0	0	0	0	0	0	0	0	0	0	0	0	0	0	0	0	0	0	0	0	0	0	0	0	0	0	0	0	0	0	0	0	0
EIF1B	3454.15	5278.45	3042.55	3610.3	3175.9	3180.6	848.465	2711.35	2294.3	1574.93	1845	734.41	0	3769.05	2273.35	0	4841.15	1173.1	0	2281.75	2049.35	0	1899.9	1549.2	1610.2	2497.25	3960.05	502.71	5451.35	2401.65	0	0	0	5381.05	2389.05	1720.55	3355.65	1489.8	1966.95	905.015	4025.9	1103.2	793.67	2316.35	795.92	2236.7	0	1007.49	2872.5
EIF2B1	11344	9493.6	9038.85	8826.9	10556.5	10128.5	8233.65	6364.9	6989.55	9051.05	6849.2	9125.6	4871.05	12318	8879.8	5904.35	857.575	3642.65	837.08	7893.35	6085.5	1171.3	11443	8797.7	1310.9	2253.85	3849.55	4511.4	9659.85	7190.65	1234.4	3781	375.66	6576.2	10845	11143.5	11480	9310.5	9479.85	10474.5	6712.95	9695.8	7334.65	7591.85	7367.2	9972.45	5137.15	6844.1	11334
EIF2B2	3962.05	7961.05	6854.8	3633.35	11315.5	8733.05	5448.5	1884.4	3624.55	5566.55	1555	4778.65	3401.9	7947.4	6856.35	4749.65	0	2219.25	0	5043.5	3114.9	0	7114.4	4595.65	689.87	1119.45	2198.25	3300.5	6712.65	5100.35	0	0	0	0	9623.6	6786.05	3014.5	6881.5	7702.9	5696.9	2401	5669.1	4349.15	3007.65	4086.35	6162	3754.25	4375.05	5856.9
EIF2B3	389590	286365	357765	259090	281870	235615	177765	85285	103586	373315	123965	178235	124700	217865	178260	123585	47072	78386.5	315020	117410	128625	530585	170880	153090	1341450	577480	162990	310190	212190	272485	0	0	0	166310	500060	252280	452005	352485	262650	118592	119800	157165	141640	142635	134730	172300	123770	157760	185265
EIF2B5	14451	20216	24096.5	12901	21629	18636	2258.87	2468.85	139.77	248.445	4346.65	2228.35	4011.65	9108.3	5546.55	3281.6	1046.25	2279.55	17185	2584.4	4391.65	38815.5	1109.47	5993	99431	45656.5	5437.4	23546.5	8544.85	14153.5	0	0	0	10176.5	18007.5	20886.5	28978.5	10268.4	12346.5	4479.4	2234.44	5774.3	976.155	5292.3	2683.45	5093.8	2276.35	3270.4	5509.9
EIF3G	121650	98192	101038	111665	120660	100628	84280	144525	92712	175555	157975	123860	169705	152725	158815	167610	185240	171790	85768	89802	83785	0	0	0	81291	140310	186710	41380.5	171090	111680	89301	164655	161845	0	0	0	90463.5	152480	94774.5	83328	144025	86010.5	62514.5	124850	65635.5	127465	136405	134060	135590
EIF4A1	88936	102103	85756.5	104195	103655	100330	61004	62950	54391.5	60359	69799.5	52892	83070.5	112715	108715	88478	103505	99131.5	65002	99430.5	90192	69060	118970	94981.5	83483.5	103670	110790	45234	108455	83089.5	0	0	0	88197.5	102920	89794	104600	83494	89513.5	64654.5	89895	61878.5	66696.5	72858	64753.5	110205	64304	90100.5	109705
EIF4G1	47974.5	64051	60147.5	46210	72241	64295.5	39313.5	31220.5	31930.5	49871.5	26835.5	52652.5	36015	44165	41365.5	33682.5	44709	37631	41757.5	27251	25824	0	0	0	45446	45480.5	44484.5	27596.5	44972	36443.5	41492	43731	46776	63913	58632.5	54223	81829	48863.5	54874	42619.5	36691.5	36588.5	32782	32517.5	28867	0	0	0	38951
EIF4G2	34914	36767	31013.5	27079.5	36775	34736	0	0	0	0	0	0	35069.5	29490	33334.5	37877	37664.5	37904	0	0	0	0	0	0	33931.5	33089.5	33252	0	0	0	30273.5	35111.5	38857	34667.5	37027.5	27017.5	46194	18615	28649	0	0	0	0	0	0	0	0	0	26805
EIF5	20764	21106	21145	22444	24677	23454.5	14030.5	11911.5	12852	19350	11425	8721.55	17759	17195	14865	16421	26340.5	18079	17274.5	13500.5	12868.5	19724	21801.5	18948	29586.5	20165.5	17597	21245.5	17923	19810	0	0	0	20642.5	32869.5	21713	28150.5	33089.5	29586.5	19783	18258.5	16056.5	12632	17352.5	12633	18044.5	14829	13905.5	17727
EIF5B	67486	81907	61349.5	51461.5	77846.5	56972.5	43213	52228	39105.5	65862.5	47877.5	49388	93746	41582	57265	70933.5	42966.5	55765.5	0	0	0	0	0	0	65045	49596	39699.5	37925	53351	46134	0	0	0	80342.5	95045.5	66712.5	86504	50145	58761.5	59969	25326	40961.5	41086.5	54775	40426	40018.5	70104.5	51590	46353.5
EML4	4199.9	10163.2	10141.5	1081.5	9776.9	9608.8	4872.05	0	2101.7	6450.2	0	4977.6	1191.09	2297.95	3453.9	2910.55	2600.25	2722.85	8365.15	5730.2	3804.3	3996.65	13957.5	14299.5	3679.9	2512.95	1840.35	2496.32	1355.4	2589	0	2974.7	2474.15	0	9905.85	6895.5	432.23	7638.9	7786.95	7335.6	0	4173	5642.05	0	4060.45	750.78	2909.15	2170.25	0
ESYT2	1657.9	10576	8354.65	3332.35	9776.45	5009.55	863.835	1675.9	1704.15	3811.8	0	1611.4	1792.85	2300.16	453.73	1037.3	3715.05	3851.7	7923.3	1319.8	1484.45	9466.9	1126.9	1845.45	18023	2507.95	3029.35	6626.7	448.665	1904.8	0	0	0	7969.6	17303	23828	6572.55	11782	16822.5	1991.65	1538.8	1324.35	890.615	0	902.17	3468.8	512.54	2098.75	2443.15
EWSR1	40903	45552.5	67364.5	0	0	0	0	0	0	0	0	0	0	0	0	0	0	0	0	0	0	0	0	0	60893.5	51832.5	37832	80014.5	50841	70375.5	0	0	0	0	0	0	0	0	0	0	0	0	0	0	0	0	0	0	0
FAM32A	944.035	4999.35	1817.95	873.88	3932.2	3650.55	0	0	0	0	0	0	1702.2	629.25	1284.8	1822.55	0	531.625	0	0	0	0	0	0	0	0	0	0	0	0	0	0	0	2443.7	4532.65	3892.95	1890.9	2887.8	3368.1	0	0	0	666.14	0	433.51	0	0	0	0
FARSA	1237.3	8351.15	10674.5	361.885	13066	7064.35	5249.55	0	2518.55	11145.5	0	6066	0	0	0	1198.7	2322.8	1577.2	9999.45	2167.7	3084.05	12856	3342.85	5317.4	9311.35	4532.35	635.615	5187.9	0	2252.4	0	4326.4	1334.1	601.37	9139.15	5768.05	2610.15	4040.65	6228.75	6372.65	0	3789.65	4931.1	0	3957.6	0	1889.45	1544	0
FARSB	1150.95	14819.5	11973.5	922.645	12882	8806.4	4537.95	647.13	1994.95	8791	0	5765.05	621.61	973.66	207.991	2186.85	982.465	1289.65	15506.5	2279.45	3575.45	20437	6502.7	3318.65	12265	5714.05	1469.8	6719.75	593.625	2373.9	0	0	0	403.56	12444	8755.95	3947.7	9528.6	9969.75	7832.2	0	4483.15	8289.15	0	2544.35	391.44	1354.14	796.685	89.031
FDFT1	70006.5	176410	184490	64585.5	114030	167855	46920	12643.5	28842	18546.5	11145.5	39116	9087.15	4859.85	5232.5	3203.65	4843.4	3315.25	78234	1397.15	9692.1	89961.5	1177.7	6965.45	190985	87727	12942.5	121460	10080.1	60448	3588.15	4946.7	2997.1	123825	123230	194380	194550	77377.5	116370	67089	4519	44999	36362	17834.5	33220	3266	4756.75	3605.4	4234.85
FKBP11	583.95	336.07	2982.8	0	0	0	0	0	0	0	0	0	0	0	0	0	0	0	0	0	0	0	0	0	1361.45	339.745	0	3941.7	0	1307.8	0	0	0	0	335.27	1981.6	0	3805.6	422.825	0	0	0	0	0	0	0	0	0	0
FNTB	631.79	1142.16	911.635	0	6595.5	1217.18	0	0	0	1609.15	0	422.86	0	0	0	0	0	0	0	0	0	0	0	0	0	0	0	429.23	528.99	436.64	0	0	0	0	0	0	0	1393.3	707.645	0	0	0	0	0	0	0	0	0	0
FOCAD	2115.2	24436	5214	7791.2	12857.5	15976	0	0	0	18338	7629.15	27626	11565.5	4891.45	8261.45	14775	4457.7	8122.9	1743.65	3611.55	5510.8	0	0	0	16774	9460.45	8799.5	0	9033.35	4437.45	0	0	0	0	0	0	30513.5	6146.1	18261.5	0	0	0	10114.2	730.94	7193.35	0	0	0	1755.1
FRG1	4640.9	3058.05	6174.95	1441.35	8768.3	5901.7	0	0	0	0	3549.8	1365.5	3828.9	1119.37	2910.05	2918.35	2542.9	3168.55	3860.6	963.59	934.36	4111.8	1353.9	721.815	1895.65	2376.45	1954.35	702.73	2545.9	2136.55	0	6048.2	4334.1	6718.3	7223.25	2983.3	5305.55	2983.3	4827.9	1747.8	2905.1	2249.2	0	0	0	2137.8	3540.8	3061.9	1730.9
FUNDC1	12550	23603.5	36117	13100.5	59448	20802	10183	1217.9	8045.4	14763.5	0	23738	0	0	0	0	0	0	12338	0	1440.85	11185	0	487.915	22832.5	17921.5	0	21189.5	521.16	11968	0	0	0	18114.5	60363	17758	19871.5	37935.5	21855	9168.25	0	7593	5906.3	1363.95	7534.4	0	0	0	0
FUNDC2	5396.05	31375.5	37991.5	4636.2	10460	21467.5	0	0	0	1424.43	318.87	423.87	0	0	0	0	0	0	0	0	0	12236.5	734.46	895.135	18373	8090.4	401.18	15571	396.93	5038.8	0	0	0	9772.7	26835	29638	9235.05	7971.3	12052	1182.3	0	505.325	507.75	769.22	601.815	0	0	0	0
FUS	63837	128935	118725	63359.5	135175	89072.5	15885	82206	35957.5	40209.5	112725	48101	32599	42910	41532.5	0	0	0	70330.5	25693.5	33909	79333.5	21653.5	23704	85054	66641	39816.5	96524	69208.5	87039.5	87648.5	41721	60241	85089	123855	72407	67038.5	98325	79879.5	18742	67776.5	31052.5	0	0	0	46581.5	30825.5	40453	38750
GAK	13632	14941.5	19094	19811.5	16471.5	15187	0	0	0	16703.5	0	19569	34920	50756	34867.5	24386	26036	26809	0	0	0	0	17886	11738.2	17267.5	32636	38850.5	17408	40087	23826.5	0	25850.5	16033.5	0	17395.8	15702.5	43543	26616	10252.3	0	0	0	8460.2	14849	20660.5	31635.5	28988	34461.5	25349.5
GCN1	2436.4	22351	19931.5	1520.4	19159	18055	4654	109.72	1487.55	4343.85	0	3209.85	217.615	210.285	149.625	329.57	36.031	96.0535	8303.75	1352	2340.65	8058.85	3393.8	3614.8	17928.5	5639.35	68.6675	23524	204.035	9052.6	0	0	0	2328.5	29179.5	32654.5	2074.65	20010	15954.5	7242.45	0	3962.15	6452.55	18.05	3941.3	110.865	187.88	140.395	45.035
GEMIN5	721.05	2098.25	1373.05	279.725	2269.35	3794.25	2521.9	0	853	2715.55	0	2839.7	674.79	7720	2742.4	686.385	0	475.595	0	4516.4	1491.7	0	10102.9	8402.45	0	0	0	1951.9	5382.6	1493.6	0	0	0	0	3665.25	2829.2	356.175	4104.3	3986.25	3460.9	517.27	3277.05	5280.6	320.46	3135.05	1282.68	463.695	802.875	818.135
GLG1	2906.9	2163.2	1772.4	0	2655.65	2306.25	0	0	0	0	0	0	5702.65	4821.9	2829.7	2743.15	3669.3	2933.15	0	0	0	0	2146.15	1282.9	5194.6	4322.4	5661.95	3483.45	5427.65	3846.45	0	3011.05	1748.65	0	3901.55	2449.95	2745.25	5172.95	2771.7	0	0	0	0	0	0	3721.3	7021.05	5034.5	4680.95
GNB1	3819.3	4627.5	6504.85	4006	12395	17135.5	17691.5	4561.85	10002	15459.2	1691.85	16537	1814	3101.5	2148.8	1603.5	2102.9	1898	0	48537	40722	0	26568.5	38152	10999	9154.85	5596.05	24160	4983.45	11645.5	920.6	1397.51	2806.9	36489	19774.5	16480.5	10166.8	25158.5	26076	27821.5	1699	20162.5	9913.9	1676.95	10933.9	4945.9	1622.45	2502.45	3110.4
GNB2	2086.7	221.5	537.57	1788.05	1820.2	0	1682	1503.55	3977.5	0	0	0	0	0	0	0	0	0	0	10912.4	8428.6	0	8701.65	9598.45	2594.4	1754.15	1247.26	6463.25	579.89	4516.7	0	0	0	0	2038.9	1395.2	1366.2	3807.75	6742.15	2448.9	0	2261.7	985.58	0	1113.91	0	0	0	0
GOLIM4	2563.8	0	2323	0	0	0	0	0	0	0	0	0	2276.9	1851.2	2739.9	2449.8	2527.85	2542.05	0	1586.1	1640.6	0	0	0	3017.1	2636.45	2288.1	4398	1256.9	1838	0	0	0	0	0	0	0	0	0	985.71	1024.9	2064.6	0	0	0	2607.2	2242.3	2423.95	2549.25
GOLT1B	1108.9	246	4812	0	0	0	0	0	0	0	0	0	0	0	0	0	0	0	11772.5	0	746.975	17076.5	0	474.295	0	0	0	0	0	0	0	0	0	0	0	0	0	0	0	0	0	0	0	0	0	0	0	0	0
GOSR1	2764.1	9280.85	7943.35	1012.6	9725.2	7313.45	0	0	0	1750.7	2271.15	681.04	1797.25	982.275	1655.3	2636.2	460.62	1804.65	8153.35	345.4	1272.45	0	0	0	10976.5	6932.05	1462.8	6845.15	1102.9	4784	0	0	0	1215.5	11186.5	7570.9	4195.4	11933.5	8708.75	0	0	0	0	0	0	218.85	1693.5	1012.75	0
GOSR2	1812	4400.75	4291.7	1359.35	1451.45	2545.75	0	0	0	3296.1	1477.5	1313.5	5577.9	1582	4858.9	4259.3	699.02	3785.5	8309.2	423.19	1088.35	0	0	0	9325.6	5804.55	1422.95	4829.55	1836.4	2880.65	0	0	0	1918	2980.85	3143.05	1496.15	0	3359.45	3022.85	652.75	2575.2	2501.65	0	1405.15	483.29	3433.75	3058.4	0
GPKOW	3805.85	9942.6	5337.6	1463.6	12572	9964.65	7667.8	4328.1	3118.7	1365.92	10472.5	2617	7139	7425.35	5796.6	6135	3544.15	4397.35	0	3133.95	2477.8	0	7009.4	4246.7	6077.7	3860.85	5596.25	6870.25	16360	12963.5	0	0	0	0	12158	7372.2	0	3856.1	8625.6	4713.95	5443.7	1611.4	3739.19	0	6792.85	6321	5756.35	6078.95	2042.5
GPN1	3153.7	4048.7	1159.21	2648.7	5880.75	1516.52	0	0	0	0	0	0	4047.75	6933.35	6413.85	4602.55	8454.25	6218.95	0	2407.85	2845.15	0	0	0	2641.45	6002.4	8139.95	1219.1	4438.7	3784.15	0	0	0	0	4998	1240.36	2373.1	2906.6	3221.35	0	4639.1	3579.05	1666	4354.65	1931.75	5853.25	4035.25	3905.6	5216.35
GRWD1	1216.5	6042.75	3045.3	0	11042	5622.05	0	0	0	2626.55	0	913.865	0	0	0	0	0	0	0	0	0	0	0	0	9247	5723.5	1430.12	4523.6	1046.75	1865.05	0	0	0	0	10502	4108.85	2549.25	9738.45	7234.9	0	0	0	0	0	0	0	0	0	0
GSK3A	2313.99	979.95	2308.65	1440.99	1117.5	1269.05	0	0	0	651.51	1494.41	823.675	992.14	5625.3	995.5	0	0	0	0	1613.1	837.915	0	1270.59	2498.6	1146.95	2092	2717.25	1916.05	3555.2	2892.85	0	0	0	2297.4	718.38	3181.1	3669.85	1096.58	1664.4	600.04	950.61	1203.18	0	0	0	1345.5	1541.6	972.93	1363.24
GSK3B	5702.05	3791.75	7944.5	4953.1	7886.7	6408.65	0	0	0	4588.3	2569.7	5652.9	2798.5	12666.5	3203.6	1645.2	4775	3246.2	4167.8	2475.7	1985.1	8253.4	3895.5	3766.5	8238	7921.4	12139.5	3121.9	15986	7315.6	0	0	0	5981.75	6129.2	8347.7	14711	4735.35	3752.75	6053.75	4588.4	4705.8	2262	2267	2408	6804.15	2664.9	2206.5	4640.85
GSN	17777.5	9888.85	9784.05	14710.5	9996.5	9137.35	9612.45	13580.5	7919.8	19546	12628.5	13580	6979.45	18835.5	16519.5	8696.9	42525.5	23936.5	3783.4	46471.5	27950	2404.2	35479	27974.5	2977.5	17350	33535	4003.25	26406	15774	13227.5	12093.9	13832	6963.05	20216.5	19825.5	5470.6	14514	17610.5	9184.2	20528.5	11295.5	16821.5	10280.4	12304.5	23028	8370.75	16162	22657.5
GSTK1	4083.25	17450	16657.5	5719.3	17969	14853.5	8947	3500.55	5530.5	7272.7	2943.9	4548.65	5486.5	8467.9	9144.3	4764.55	7297.1	6630.45	5209.65	7343.1	5730.85	5236.2	5509.9	6984.25	12411	10992.5	9178.95	16405	8250.8	12878	0	3301.3	4166.95	4978	14257.5	17825.5	4666.6	14894	13495	10557.5	2814.55	7999.85	6128.45	2842	7199.75	8599	5163.6	6503.4	6235.45
GTF2F2	4458.3	2943.75	2462.25	7645.5	5292.7	3449.75	1462.4	3245.05	2101.8	1939.9	6365.65	2596.9	0	0	0	0	0	0	7471.8	3117.55	1757.2	4527.5	5579.8	4265.3	0	0	0	0	0	0	3658.8	5255.15	6924.8	9590.2	6158.5	3329.7	4476.45	4609.2	4998.9	2075.65	3075	1743.95	0	0	0	1191	1987.95	1543.8	0
H1-10	6346.05	9898.05	10457	2887.55	3304.95	6971.7	0	0	0	0	0	0	5179	3914.7	4507.9	3990.15	6984.35	5520.2	11962.4	1426.65	2629.65	14801.5	476.21	2815.45	6842.4	7270.45	8513.45	4011.55	6108.9	5916.25	6142.1	16904.8	8948.3	7834.6	11560	4860.15	8111.15	13648.5	5629.05	0	0	0	0	0	0	3950.4	5177.7	5256.45	1327.4
HACD3	333.51	4460.2	3099.6	236.635	4786.3	4060.15	0	0	0	95.2375	0	79.4615	0	0	0	0	0	0	444.975	214.525	123.66	308.185	115.495	94.378	6691.75	1628.95	0	10383.4	0	3088	0	0	0	1268.1	5592.95	5968.55	349.18	4504.6	2660.4	377.165	0	312.595	0	0	0	0	0	0	0
HADHA	81201.5	100062	83607.5	43802	90412.5	81981	18125.5	16727	14463.5	11684.5	19552.5	20271.5	17173	13894.5	12677.5	0	0	0	108490	3841.5	10196.8	126805	7148.85	12818	101837	48699	8124.75	109250	13004.5	58499.5	13038	20319.5	19523	81699	82270	86135	61325.5	40338	80810.5	30891	16925.5	23031	20770	17505	18383.5	12740	19837.5	15147	12582
HADHB	42402	41377	44017	23159.5	33630	37751.5	6598.45	8417.55	8019	0	0	0	0	0	0	0	0	0	52884.5	2515.5	9888.1	64702	2440.3	6886.65	69343	34333	8004.55	64759	9349.75	32941.5	0	0	0	33951.5	22543	40036	31734.5	17262.5	31431	13804.5	5500.15	10114.5	7705.95	6399.6	7163.65	8690.15	10726	9715	0
HCFC1	3210.2	514.91	2437.95	0	0	0	0	0	0	0	0	0	0	0	0	588.53	873.32	564.31	0	561.3	779.22	0	380.395	621.29	480.85	912.455	1083.05	16210	1059.36	1611.15	0	0	0	0	0	0	0	0	0	0	0	0	0	0	0	0	0	0	0
HDAC1	12630.5	3145.25	7731	10860.5	2115.85	6108.15	11223.5	9456.5	6274.6	4335.1	8037.95	6165	9355.8	15545.5	13532.5	9999.85	21759.5	14678	0	2090.45	3509.35	0	6803.2	2831.6	8386.25	15727	25465	8334.8	16869.5	12045	934.97	7967.05	7728.3	4538.35	10645.7	3809.95	10054.6	2612.45	14651.5	9230.2	11708	12509.3	2108.5	6418.65	11882.5	13680	10476	11946.5	8648.35
HEATR3	3607.2	60930.5	54635.5	5665.25	57767.5	51090	6952.75	0	1756.85	6284.15	0	8511.05	0	0	0	0	0	0	19325	161.43	3098.65	26228	1433.95	3210.85	27828.5	12195.5	409.75	23134	532.27	12028.5	0	0	0	5425.6	44871.5	42544	13874.5	28228	31931.5	11546.5	0	7118.2	8142.7	0	5150.8	0	0	0	0
HMGB2	486.16	17782.5	13815.5	0	8539.2	11871.5	13157.5	0	6011.3	8548.6	808.56	7898	1053.17	1647.35	1778.55	2150.35	552.66	1770.85	0	3639.25	2342.9	0	4353.2	3731.9	382.57	447.48	321.62	557.405	1354	773.43	0	0	0	0	7189.05	8356.2	1456.8	6084.2	6381.25	9337.2	0	6122.9	7059.55	0	5457.8	615.66	912.37	17189	461.19
HNRNPA0	40060	49208	27958.5	27801.5	39329.5	34642	0	0	0	0	0	0	0	0	0	0	0	0	0	0	0	0	0	0	35068	26266.5	27045.5	28240	27680.5	26806	0	0	0	49424.5	30361	29059	36902	32198	27795.5	0	0	0	0	0	0	0	0	0	0
HNRNPDL	6196.95	12773	11953.5	4465.4	12381.5	11219.5	1494.65	9312.6	3557.9	2393.1	6420.5	3951.7	1832.3	8931.95	5955.45	2935.1	6723.65	4183.25	7329.8	3196.65	1455.15	9262.75	3370.55	2490.25	6068.3	7490.45	9319.2	10925	10981.5	12813.5	7459.5	7564.8	6600.6	1835.7	8944.25	6902.95	1165.1	7814	9184.4	1495.85	4201.15	3843.35	4416.65	3320.1	3435.35	6340.4	4167.9	4714.8	5695.75
HNRNPM	12383.5	15401.5	19714.5	0	0	0	0	0	0	0	0	0	0	0	0	15552.5	14841.5	15455	13414	15320.5	10124	15473.5	13170	14429	21202.5	21114.5	22246	30506.5	15236.5	23438.5	0	0	0	0	0	0	0	0	0	0	0	0	0	0	0	11984	22233	16934.5	0
HNRNPUL2	377.85	898.675	984.375	0	0	0	0	0	0	0	0	0	0	0	0	0	0	0	0	1151.98	686.205	0	0	0	0	0	0	9399.2	1513.35	2476.85	0	0	0	0	0	0	0	0	0	0	0	0	0	0	0	0	0	0	0
HSD17B11	46.939	16207	8674.15	0	16333	12003	0	0	0	602.21	0	755.545	184.785	191.185	67.3545	0	0	0	0	585.17	654.34	1317.8	1191.5	946.45	4317.35	1330	0	4107.55	355.353	2523.8	0	0	0	456.22	18637	13942.5	1277.51	10225.1	11719.5	2275.25	0	663.99	0	0	0	0	0	0	0
HSD17B12	36576.5	42512	31152.5	17518	38123.5	35368	14041	11126	9089.7	12360	12978	12182.5	0	0	0	0	0	0	50740	3493.1	10991.5	53987	6328.3	9477.05	0	0	0	44866.5	4973.05	25279	0	0	0	33448	43140.5	36416	25793	23496	33929	25766	12937	16797	15274	12265.5	13517	0	0	0	0
HSD17B4	24927.5	36227.5	27236	20754	35291.5	27037.5	12478	9816.4	9889.95	15370	17499.5	15226.5	10922	13762.5	13181.5	0	0	0	38607	12894.5	15317	47800.5	15254.5	15377.5	25855.5	17163	10012.2	15359	16464	16658	20951.5	9432.5	12891.5	29459.5	31428	25009	30517.5	19766.5	24968.5	16805	14041.5	13089	12205.5	13132	11993.5	15844.5	6992.6	11285	11791.5
HSDL2	16666	50469	32040	17369	44099.5	32119	0	0	0	0	0	0	0	0	0	0	0	0	0	0	0	0	0	0	0	0	0	0	0	0	0	0	0	19644	49629	33343	26354.5	37701	34707.5	0	0	0	0	0	0	0	0	0	0
HSPB1	10629.5	40006	32579.5	22780.5	29518.5	24298.5	0	0	0	0	0	0	0	0	0	0	0	0	16272	19380	21188.5	0	0	0	34546	27894.5	25063.5	26701	16514	23459	0	0	0	16961.5	43589	37596	29960.5	27237	31781.5	0	0	0	0	0	0	0	0	0	0
HSPBP1	2070.95	1095.95	1166.3	0	515.165	1337.36	1995.9	3977.8	0	3164	3301.7	1142.13	0	0	0	1311.5	752.17	3376.7	0	4074.8	1612.73	0	7769.35	5995	0	0	0	0	0	0	0	0	0	0	764.935	1030.3	792.44	3400.8	2482.1	7455.25	2548.8	2732.9	7532.1	4040.15	4262.2	1674.5	4728.65	3633.3	2843.3
HTATIP2	4095.5	3128.95	3841.85	4444.2	3201.2	2880.55	2443.5	0	2151.25	5024.15	0	2152.35	0	0	0	0	0	0	0	1168.5	2202.2	0	1728.7	1296.05	1036.1	3543.1	449.99	4344.3	466.66	1804.07	0	0	0	0	7588.75	5583.5	0	7873.5	7396.95	1755.45	0	2309.95	2771	0	1846.8	0	0	0	0
HTATSF1	11655.5	13868	10079.8	11037.1	2862.65	6573.65	74.024	4481.1	1255.35	0	13207.5	1271.35	15244	12914	12048	16965.5	6821.15	11760	9431.05	5347.4	4891.8	14646.5	6300.05	4901.55	15393	14227.5	14451	1799.3	14932	6836.8	8702.8	10251.3	10895	7785.35	7110.5	9449.85	21039.5	520.63	3938.35	499.725	7521.1	1391.05	242.045	8117.05	944.325	8612.75	16666	13072.5	7655.15
ILKAP	1959.55	5225.6	3153.15	451.99	4912.5	3911.75	0	0	0	720.98	3348.75	776.59	4298.25	5872.1	4477.6	5053.75	1826.5	2878.85	977.56	625.815	677.77	2936	1535.55	811.28	1945.45	3329.55	4555.4	726.015	7199.1	4305.45	3563.2	1459.1	1554.8	0	4623.15	3290.05	394.42	3173.6	4041.85	389.105	2032.9	962.185	672.625	1661.55	713.115	4691.55	8762.8	5903.55	1577.85
IMMT	8.3269	235.11	13.582	0	6879.5	3627.55	0	0	0	10683.5	0	9686.55	0	0	0	0	0	0	0	184.35	17.1018	0	50.3805	523.82	0	0	0	74316	394.75	23624.5	0	1563.73	112.253	0	13856	11034.5	4.9103	51107	39307	2596.75	0	1246.1	885.025	0	122.183	5.27005	428	159.64	0
IPO4	20269	65267	58077.5	12124.5	60331.5	63047	11282	4873.45	3496.75	6067.85	15.61	9134.2	5183.5	28.8595	21.5	5803.3	3839.4	5055.05	43524	300.57	6700.75	52131.5	2680	6712.2	90916.5	33250	187.195	51662	2009.03	21335.5	0	0	0	18764	53287	62921	26058	37066	43022	20593	15131.5	13388.5	16218	280.715	9684.95	6170.7	6226.85	5453.3	4573.1
IPO5	21536	92220	77700	18271	80890.5	76449	0	0	0	15553.5	11352.5	15569	0	0	0	0	0	0	52071.5	9397.95	13557.5	58938	14601	14704	103005	48741.5	7868.45	71640.5	6091.8	36860	0	0	0	14506	76613	82851.5	23707.5	53961.5	51105	30547.5	10185	22928	24940	10850.5	20846	0	0	0	0
IPO7	86321	272495	270990	92563.5	223220	204710	93857.5	17699	57844.5	99898.5	16970.5	67964.5	0	0	0	0	0	0	150500	4086.7	24887.5	146545	6512.1	15019.5	324935	140310	12016	199340	6885.1	98569.5	0	0	0	131780	223730	237875	162425	140510	135530	111415	6795.55	80853.5	63939	25482.5	73525.5	0	0	0	0
IPO8	3187.7	9321.6	10015.4	2381.9	11045.5	12484.5	439.22	309.15	464.595	236.55	0	98.117	371.61	1925.2	1214.98	280.56	1011.2	642.845	3114.5	115.775	184.938	3131	260.185	187.365	12399	5595.55	1322	7239.75	1793.65	3568.25	0	369.345	436.38	2819.8	13409	13499.5	6110.45	9233.9	11836.7	543.15	671.535	1219.1	83.7725	401.72	482.305	720.6	322.86	177.415	167.82
IPO9	32472	59658	63106.5	41318.5	50315.5	48974	46327	646.615	24664.5	0	0	0	0	0	0	0	0	0	40017	6807.25	10248.4	30819	9774.4	10936.5	103960	46580.5	4028.9	74144	2206.05	33927.5	0	0	0	55904.5	74631.5	75275	69098	37323	47180	56468.5	1080.15	44330	33757.5	3594.3	31239	0	0	0	0
IQGAP1	868.24	11447	8576.3	7784.2	7446.6	8923.3	10764.5	428.195	4647.15	12223	597.275	10460	1384.15	2163.15	992.89	1865.35	1845.95	1670.8	7684.95	10327	8610.2	12258	10691	12761.5	30538	12410.5	2059.15	27329	1918.95	13648	0	0	0	8841.5	5809.3	9702.75	10587.3	2927.5	7243.2	12286.5	182.59	9256.25	17447	1598.91	15434	431.115	578.395	844.31	414.035
KHSRP	756.46	769.19	3009.5	493.39	55.691	1071.2	0	0	0	136.02	1359.2	142.62	6287.75	11260	7918.05	1908.2	17562	7786.9	0	0	0	514.13	92.804	1328.3	5412.2	11895	18698.5	84588	14810.5	43013	3321.85	30472	16936	0	6657.11	411.915	447.27	603.805	128.109	0	0	0	0	0	0	5423.2	29909	18229.5	5472.1
KIF5B	5598.65	1657	3555.15	6805.1	2542.8	2190.4	4560.2	2869.7	2588.35	3039.8	5743.8	4025.7	6190.35	2505.75	4228.7	6472.35	1397.8	3403.4	363.36	6812.6	4210.65	859.465	14358	12761	1181.38	1490.15	956.71	618.66	1639.4	987.87	0	7719.6	6404.35	4731.2	4078.25	5036.05	3691.55	4839.75	3823.6	6069.3	3542.05	4569.1	11407	1341.76	6500.15	2585.65	3795.75	3454	1529.87
KLC4	21678.5	3612.5	17653.5	13988.5	0	5421.15	0	0	0	0	0	0	24400.5	7362.85	13207.5	15639	10084	11900.6	0	0	0	0	0	0	0	0	0	0	7990.25	10900.5	0	28519.5	32127	0	0	0	0	0	0	0	0	0	0	0	0	11147.5	27057.5	21245.5	9395.3
KLHDC4	646.5	1157.95	724.145	0	1543.05	1215.2	0	0	0	614.895	0	1029.11	5035.7	1227.35	2499.55	3481.85	1945.5	2381.05	0	0	0	0	1575.75	579.3	0	581.435	901.2	0	0	0	0	4146.2	2007.15	0	2111.45	680.2	1612.3	4126.6	939.295	986.35	0	465.47	874.445	1180.4	50.19	307.07	4414.4	1995.3	358.21
KPNA2	46502	50676	45778.5	32087	53862	55319.5	0	0	0	0	0	0	42101.5	46964	45368	48738.5	53522.5	51105.5	0	0	0	0	0	0	0	0	0	35561.5	47329.5	43431	0	0	0	0	0	0	0	0	0	42457	40654	33195	0	0	0	0	0	0	0
KPNB1	23441.5	134860	129760	50319	142345	124960	59414.5	9793.95	39238.5	48392.5	9011.85	50597.5	0	0	0	0	0	0	84218	33704	35149	103230	58059.5	50312	159400	85901	27940.5	113850	15270	62032.5	0	0	0	33059.5	195005	149860	66337.5	133140	109675	73887	11786	45753.5	75594	12286	54255	0	0	0	0
KRAS	5167500	2444800	3732450	4189800	1504200	1835450	1439250	958315	2353400	471380	1056085	1468650	620025	299695	394715	317260	355570	329660	15286000	207735	2317650	17286500	132940	1010105	6879000	5197400	726260	3240450	521050	2262600	869915	552140	575870	9446200	1361350	1872700	6649200	822775	1259100	1367300	488025	1306000	934730	1372500	1205300	321255	309460	314955	439740
LAMC1	5865.9	26964.5	19643	0	0	0	0	0	0	47804	13212	54409.5	6711.3	12425.5	9921.2	18102	7916.3	12687	0	0	0	0	47883.5	17826.5	0	0	0	19930	9484.3	0	0	0	0	0	43919.5	28034	0	53992	36982.5	32394.5	11733	25370.5	35920	0	23069	0	0	0	0
LARP1	1095.5	4925.4	3968.75	986.2	4800.25	4143.85	0	0	0	3875.31	1799.3	863.98	3592.25	1949.35	1032.58	2970.1	1777.85	3054.6	976.69	2972.95	1844.9	1802.5	5265.2	4210	5870.95	3503.05	2840.4	3742.35	2596.95	3387.6	0	0	0	3595.8	3253	3881.6	3774.5	2948.65	1648.11	6318.25	0	2566.7	4567.3	0	3238.75	1062.04	2879.2	241.72	0
LARP4	3766.1	3480.5	4115.8	2741.36	4775.15	2744.65	4664.9	4111.45	5359.4	0	0	0	3886.6	2450.55	3893.1	2707.25	3503.9	3612.75	0	0	0	0	0	0	0	0	0	1902.72	3694.65	1325.6	0	0	0	3165.9	5920.8	2387.7	0	8134.1	3928.35	0	0	0	0	0	0	3631.45	3756.55	3924.15	0
LEO1	3073.1	2047.75	2801.85	2192.55	6098.25	2263.65	1140.05	2767.65	2065.3	1128.2	1674.8	1419.43	5713.4	7412.65	6279.6	3893.25	1454.4	2311.05	0	3111.35	2874.95	7448.1	2893.05	1204.15	8056.25	5067.8	3496.75	3431.95	6940.75	6858.8	0	3994.8	2589.4	0	7416.25	4665.65	1586.85	3975.05	2524.15	0	0	0	554.975	2261.35	1468	4799.55	5969.25	7524.5	4048.65
LETM1	768.97	2864.6	2797.9	0	3854.25	3765.9	0	0	0	2726.6	0	4804.75	0	0	0	0	0	0	0	0	0	0	685.6	990.665	6980.25	1248.65	0	22624.5	0	6981.5	0	0	0	0	12086	10560	0	13258	16684	4256.3	0	1408.96	0	0	0	0	0	0	0
LIMA1	2854.7	3574	2153.1	0	8438.9	5109.7	32433.5	5003.45	21148.5	46064.9	2325.7	30738	5930.45	14079.5	11721.5	9180.9	15077.5	12044.5	1200.2	70432	55756.5	959.09	31622.1	26598.8	144	10208	16712.5	1743.4	18104	10033.3	3689.5	11009.5	11134	0	11009	5986.05	546.19	19509.5	13019	32673.5	13711.5	26353.5	23312	2453.7	22037.5	16590.5	8316.3	13718.5	13750.5
LIN7C	2956.15	3332.05	2358.9	1649.45	4494.9	2408.25	319.26	3559.65	1452.65	2279.8	4090.9	2391.2	7107.3	5336.55	6800.7	1837.25	2426.6	2774.1	2139.2	7161.95	5995.85	0	8126.1	7062.8	8917.8	6252.95	4291.2	4690.7	5420.3	5827.05	3268.5	6030	8133.4	0	0	0	0	15828.5	9204.6	0	0	0	0	0	0	3984.2	8987.65	7431.3	2245.45
LMAN2	282.86	2193.1	2685.45	0	4801.1	2350.6	0	0	0	1023.55	0	1170.65	0	0	0	1453.5	2820.4	1675.7	0	2102.3	1304.98	0	1604.85	1035.32	3317.15	3266.95	4458.55	10138.5	2190.35	2287.65	0	0	0	0	7271.25	5534.55	0	8333.85	8720.65	0	0	0	0	0	0	0	0	0	0
LMO7	9298.1	2872.3	7253.3	1863.25	1796.5	7877.25	4659.1	17933.8	8480.25	15118	28735.5	19089.5	15536	13300	14145.1	15245.1	17331.7	16509.5	0	4889.6	4767.15	0	0	0	2613.85	6344.45	8519.3	8132.85	15504.5	12688.1	13883.5	11904.3	13105.4	0	0	0	3825.46	31028	27009.5	21395	24817.5	20901	13976	20559.5	8850.2	13622.1	17470.5	16574	13028
LRP5	4330.5	11227.5	10073.2	1702.15	8270.1	10181.4	0	0	0	0	0	0	17734	3742.1	9982.8	9226.5	2625	5634.8	0	4358.8	2060.3	0	0	0	0	0	0	0	0	0	0	7493.3	4625.15	0	0	0	0	0	0	0	0	0	0	0	0	0	0	0	3529.6
LRPAP1	6498.15	13394.5	12503	0	0	0	0	0	0	0	0	0	0	0	0	0	0	0	0	0	0	0	0	0	0	0	0	0	0	0	0	0	0	0	0	0	0	0	0	0	0	0	0	0	0	0	0	0	0
LSM14A	1782.34	2937.6	5763.35	2502.15	5436.95	3308.95	1673.45	0	989.865	4677.15	1528.48	2109.15	2746.1	3003.25	1891.05	3231.15	4616.85	3616.15	2426	2475.6	1846	0	1863.12	393.21	3534.2	3227.15	3506.6	1962.3	4012.45	3621.85	0	2449.75	1631.66	4996.9	4617.75	2031.34	4829.6	7863.25	4128.15	0	0	0	200.82	0	1290.1	2333.95	2267.35	1492.7	1136.1
LSM14B	3960.5	3509.05	5435.8	3513	5957.35	3706.5	4387.75	0	2409.2	3721.6	1407.3	424.68	2984.5	2402.3	2689	2797.9	2406.75	3301.45	2398.6	4031.55	3238.95	1391.4	1898.1	3262.35	3516.2	3663.6	3239.15	3878.45	3352.75	3989.6	0	0	0	6701.6	5109	3691.4	6512.85	8510.85	6584.55	0	1572.55	3655.5	1953.25	1665.8	3441.6	1866.5	2845.9	2580.1	1517.5
LSM4	8843.9	18462	11007.5	8782	21470	15886.5	2651.45	2487.95	1877.15	4195.15	4613.55	3915.65	6337.85	6814.5	7240.35	5916.8	7321.8	5705.55	1897.55	3666	2776.95	4134.35	7500.5	4702.6	4708	6893.55	8708.7	5283.6	12270	9534.3	0	4703.8	3449.15	4098.75	19604.5	9517.55	5378.15	22526.5	6636.4	2888.55	6028.5	3139.5	5291.55	0	2964.95	7492.9	8741.3	9226.05	5067.45
LSM6	3863.5	3533.55	2435.7	3290.6	0	3161	0	0	0	0	0	0	3728.9	3125.4	4056.2	1500.5	2365.45	2006.05	0	0	0	0	0	0	3382	3068.15	2393.35	2999.5	3206.75	3208.2	0	2984.55	2330.85	0	2986.15	2659.25	0	2011.7	2098.75	0	0	0	0	0	0	3396.5	5377.7	3194	2943
LTA4H	12358.5	0	674.6	7349.45	253.13	456.91	2297.15	0	682.26	0	0	0	0	0	0	0	0	0	4798.8	2514.55	1224.34	0	22478	8683.65	0	0	0	0	0	0	0	0	0	0	0	0	7584.4	7103.65	2311.35	1209.5	0	735.535	11945	0	2399.95	0	0	0	0
LUC7L2	7020.3	25817	27991.5	0	0	0	0	0	0	0	0	0	0	0	0	0	0	0	0	0	0	0	0	0	0	0	0	0	0	0	0	0	0	0	0	0	0	0	0	17971	9647.2	14837.5	16702	6030.8	14376.5	0	0	0	0
MANF	6968.9	1853.1	4513.1	8666.75	2494.35	2730.9	1875	8652.2	3584.15	0	0	0	5743.85	3307.9	3479.7	4093.65	2236.45	2844.6	0	2052.75	2217.4	0	0	0	4430.4	3601.05	1888.9	4218.45	2135.55	2594.25	0	5437.1	5757.2	7026.45	0	2762.75	4070.1	1041.9	1642.1	1037.2	4216.6	2638.3	0	4546.85	1415.15	3595	7267.15	4695.3	2192.7
MAP7	4572.1	3716.2	3116.8	6003.35	5268.75	3185.6	0	0	0	0	0	0	3292.7	0	1717.7	0	0	0	0	0	0	5960.2	0	2429.8	0	0	0	0	0	0	0	0	0	6530.1	4826.65	3449.75	7207.3	2815.05	3031.5	0	0	0	0	0	0	0	2425.6	2467.95	0
MARK2	1982.85	1780.3	646.77	2377.9	2693.35	1269	0	0	0	0	0	0	1094.9	797.47	586.5	0	0	0	0	0	0	0	0	0	819.015	869.63	849.62	0	0	0	0	0	0	1526.1	2489.45	1341.65	2802.5	1470.05	1317.88	0	0	0	0	0	0	0	0	0	0
MARS1	3121.15	9380.45	11692	2879.9	11743	13530	0	0	0	0	0	0	0	0	0	0	0	0	0	0	0	0	0	0	0	0	0	0	0	0	0	0	0	0	0	0	0	0	0	0	0	0	0	0	0	0	0	0	0
MCTS1	299.92	10960	6940.35	292.11	7261.25	9552.95	4914.15	0	1081.75	2000.3	0	5819.4	0	0	0	2260.65	3236.4	1720.05	1460.4	2396.85	531.88	652.41	4481.35	3136.6	496.5	446.03	1578.75	3609.4	2896.8	3294.1	0	0	0	0	7940.2	9409.85	462.43	2930.6	4655.55	2161.2	523.46	2920.85	4054.4	631.51	2408.35	268.33	1932.7	1517.65	0
MDH2	126435	107680	115355	164250	90329	141085	140430	122725	118470	75263	91372	89542	67405	90579.5	79988	69945	100548	81819.5	147040	72649.5	84610	176005	86800	89853	112265	105035	105925	278375	97894	192690	135170	92407.5	86939.5	116152	73314.5	105890	97780	50611.5	76195	140715	113165	109805	104100	82313.5	111450	109060	85821	98553.5	114840
MDN1	10514	18799.5	12852.5	0	22972	12290.5	0	0	0	13096	0	6149.85	17309.5	10909	12425	18569.5	17381	7188.55	10694.5	7227.45	16185	0	0	0	9205.25	7447.1	14872.5	12088.5	11056.2	7288.4	0	0	0	13488.5	21737.5	12740	6914.85	21383.5	17996.5	10115.2	10899	6885.6	0	0	0	7687.65	17891.5	6970	13164.3
METAP1	2080.05	2856.75	5598.25	5355.4	2739.25	4203.05	0	0	0	6146.95	0	1617	0	0	0	5459.35	5890.1	3468.8	8458.4	60.873	128.31	4968.6	542.32	1135.74	2789.9	2608.16	3294.75	3506.2	4950.35	835.51	0	0	0	771.85	2885.95	3246.15	1750.05	6841.15	1279.75	769.84	1126.81	975.19	390.09	1700.2	8186.5	0	0	0	0
METAP2	33170.5	29992	27338	3830.05	35823.5	20681.5	19050	0	9286.35	19740	1778.9	29952.5	0	5694.8	1712.2	1603.55	9653.9	0	3352.45	8446.7	5816.45	4523.35	14306.5	8822.1	7831.55	5733.6	5489.4	6121	9180.9	8831.95	0	0	0	3182.4	40440	17349	6388.75	20411.5	24276	25055	0	20197.5	18938.5	6133.6	12633.5	0	0	0	0
MFAP1	1852.8	7473.25	6633.9	0	0	0	0	0	0	0	5164.4	1053.65	5628.3	2161.3	4602.05	6593.05	0	3045.8	0	0	0	7827.75	580.74	757.72	5499.2	3048.8	1038.67	205.94	1751.23	1865.2	5106.6	1773.2	1851.5	0	2332.15	5063.55	3734.45	1505.1	1107.38	0	0	0	823.65	3221.7	682.045	822.12	2359.5	1551.18	0
MOB4	1713	1360.25	955.3	1550.9	2288.15	1333	0	0	0	0	0	0	0	3022.1	1191.82	0	0	0	0	0	0	0	0	0	867.77	1571.85	2716.2	712.255	1890.15	1362.05	0	0	0	0	1898.1	937.98	1019	3756.2	2817.45	2257.15	0	1733.1	2850.8	0	1452.45	0	0	0	0
MOGS	1513.35	8473	6164.75	0	4288.95	5141.45	0	0	0	812.775	0	703.35	157.14	723.165	716.205	0	0	0	0	0	0	2583.73	966.19	204.895	3189.6	1144.49	393.3	4913.5	1331.3	2120.82	0	0	0	728.22	6289	8641.25	1850.85	2497	3567.65	0	0	0	836.695	0	284.345	0	0	0	0
MRPS7	2819.5	3220.92	3182.25	0	3998.65	3734.05	0	0	0	781.31	0	3447.7	4556.4	2718.7	3861.35	5394.65	871.09	3655.05	0	0	0	0	0	0	931.65	1426.1	1711.4	11783.2	3083.45	6322.55	1010.7	3703.35	4019.95	0	5381.55	8818.8	2045.2	11441	13440	2608.45	0	1338.18	497.715	3076.2	931.065	763.88	11317	5622.45	1776.85
MRRF	5121.15	4927.55	5067.45	1773.05	2887.7	4026.6	1445.85	1712.35	796.83	1068	1493.9	2324.35	2366.45	2074.25	2206.6	3268.4	840.745	2442.55	2712.55	0	666.63	2548.9	587.815	694.55	3359.25	2352.4	1951.25	2430.55	2724.15	2413.3	0	6251.05	2034.8	3690.7	967.89	4138.35	2292.2	1647.4	1516.9	1760.62	2322.15	2833.75	1281.83	1058.3	1694.15	551.785	3883.45	2424.35	707.04
MTA2	35280.5	7165.5	16214.5	27422.5	14150	13806	4422.1	25624	5747.05	19535	14654.5	6847.4	16182.5	27931.5	28536.5	11278	60776	35421	0	0	0	0	0	0	4559.65	28015	48465.5	11920.9	27261.5	26644	0	28993.5	19428	14224.7	18523.5	13490.5	18029.8	11689.5	16093	8357.5	29219.5	12435	0	0	0	27957.5	25532.5	26377	24429.5
MTDH	10805.5	8642.85	11328.8	2098.1	7106.75	11947	2830.6	3979.8	1630.5	1591	2705.2	3175.45	6290.85	6590.45	4628.65	5172.35	1998.1	4978.1	15197.5	473.205	1297.5	9561.25	847.12	1447.2	7504.15	5750	3410.2	6285.65	5930.1	6648	0	10036.2	9502.8	7414	4158.05	5925.6	7618.9	2942.35	3059.85	3697.95	2713.8	2797	871.58	3950.9	1132.73	3705.5	7394.2	6108.5	921.05
MTHFD2	3878.25	7378.5	2908.25	3684.85	9089.75	6858.95	0	0	0	0	0	0	2652.25	3701.35	3717	3037.6	1774.8	1805.1	0	0	0	0	0	0	3133.2	2369	2900.25	826.08	6034.75	1394.4	0	3174.5	4541.25	1359.4	7021.55	2828.1	4193.2	4094.3	3116.1	0	0	0	0	0	0	5269.85	3433.2	2588.65	3487.05
MYO1D	973.28	8923.55	6854.7	643.555	26754	22290.5	12846	2150.35	4776.05	21887.5	478.625	14861.5	396.11	2456.3	1295.5	2202.6	24.625	739.245	0	22272.5	17363	2359.55	14267	12518	6889.25	2216.2	1802.1	18289.5	3781.65	10675	4212.85	1993.95	3121.65	1471	20313	20919	1080.22	49876	35915.5	30062.5	624.21	21909.5	9864.7	0	7326.45	325.335	1997.9	1162.4	0
NAMPT	1620.6	2426.6	2270.9	1456.75	2600.95	3207.85	4532.55	0	1114.4	587.225	0	2305.65	2736.35	863.725	1180.1	3469.85	3878.5	3241	0	5367.55	2805.65	0	6939.35	7157.7	1195.35	2308.15	3490.65	951.27	902.715	794.955	0	0	0	0	1559.8	3500.3	1837.7	659.925	1704.75	4149.75	0	2450.7	5440.35	0	5483.45	264.205	2883.25	2020.4	413.6
NAP1L1	31007	35235.9	29901.2	25856	58716	48392.5	0	0	0	0	0	0	0	0	0	0	0	0	0	0	0	0	0	0	71200.5	41246.5	16182	0	0	0	0	0	0	21658	67401	58243.5	28178.5	42500	44860	3193.35	0	924.35	5672.2	0	1320.15	0	0	0	0
NAP1L4	21807	59779	68217.5	20742.5	51319.5	46686.5	0	0	0	0	0	0	0	0	0	0	0	0	0	0	0	41427	28465	28573.5	0	0	0	0	0	0	0	0	0	19319	43232.5	55618	0	0	0	0	0	0	33039.5	22030.5	28593.5	0	0	0	0
NCL	134520	375895	380475	120045	287120	300095	146005	89413	111545	149380	91353.5	126075	0	0	0	0	0	0	0	0	0	0	0	0	0	0	0	0	0	0	0	0	0	142240	236970	253600	125600	189140	165710	0	0	0	0	0	0	0	0	0	0
NDUFAF2	479.33	13425.5	6963.45	0	4096.2	4782.65	0	0	0	0	1900.8	385.705	20479	7816.5	17335.5	8309.05	561.335	3357	0	0	0	0	0	0	20154.5	13631.5	5008.3	1192.95	4863.1	3280.4	0	8701.9	5238.95	0	10500.5	3318.6	550.24	7747.4	11504	0	0	0	0	0	0	2752.7	10552.2	5012.15	710.395
NELFA	4090.7	5048.65	5970.25	0	3963	10041.8	0	0	0	0	0	0	1905.7	2466.5	1365.3	1431.25	2378.25	1839.45	0	1788.45	844.88	0	1168.34	1470.6	0	0	0	2373.55	2545.3	3518.9	0	0	0	1148.3	3009.45	7254.2	2607.4	2909.1	1707.15	1418.3	1812.85	1704.9	0	0	0	1547.9	2793.95	1602.5	0
NELFCD	4594.95	8562.3	4531.9	3546.9	14263.5	11248.5	0	0	0	2474.2	1991.6	698.42	0	2589.75	727.22	684.52	1585.85	588.11	2578.55	2177.3	2713.4	0	911.025	598.575	546.47	1377.8	1712.95	3248.35	1821.25	3212.25	0	0	0	0	8101.75	3514.2	1452.1	7412.65	3272.25	43.707	3692	1196.88	0	0	0	0	0	0	0
NF1	1105.03	8191.45	4587.5	0	3369.25	3071.2	0	0	0	0	0	0	0	0	0	0	0	0	0	0	0	0	0	0	9737.25	1724.1	0	3882.75	0	1138.59	0	0	0	0	1739	1863.19	1422.5	525.665	992.65	0	0	0	0	0	0	0	0	0	0
NIPSNAP1	2752.6	1961.25	4888.05	0	1987.55	1657.4	0	0	0	4754.45	0	2566.65	10714	1956.9	5238.9	7698.5	0	5283.75	6206.45	0	1978.35	8769.65	2485.35	2851.15	11530.5	7880.25	3957.6	10625	2933.75	5289.95	2359.9	6188.85	6623.55	0	2818.85	6255.8	0	6519.55	2609.8	0	0	0	0	0	0	4339.05	5950.4	5183.4	2386.85
NOLC1	4615.8	31784.5	21547	4370	38191.5	28235	4451	4960.05	4418.9	12932.5	5236.45	10249	6711.15	1912.2	1119.94	4270.3	2115.8	4177.05	6287.8	5141.1	4013.4	11354.7	6730.7	4648.25	5245.3	3624.3	1160.6	9304.6	2969.3	5532.4	3276.8	4487.75	3386.4	10526	31009.5	19601.5	9138.8	29140	18570.5	2663.4	3001.65	3493.45	3991.25	2958.45	3484.35	2034.8	4161.2	3809.7	2290.9
NOMO2	1314.2	1801.1	460.895	1629.5	2163.15	804.84	0	0	0	2623.8	1811.6	842.135	1373.6	2106.05	1991.9	1924.25	2557.9	2239.15	0	1334.85	1230.55	0	0	0	1137.02	1236.85	1035.64	16035	584.3	3227.35	0	0	0	0	2384.7	875.185	1488.4	2937.25	2663.95	1362.3	0	1442.7	903.525	0	990.035	0	0	0	0
NOP14	1756.9	14244	9763.45	949.375	4239.8	6922.55	8928.8	0	3744.65	0	0	0	1824.7	866.12	964.655	1581.05	1102.2	845.96	2794.6	2154.69	2652.04	4695	7333.9	3696.65	5214.05	3909.7	2157.45	4011.75	1727.65	3696.3	0	0	0	0	4091.25	7552.9	1091.17	1180.78	3042.95	5468.13	0	3945.45	8399.9	0	6920.15	0	0	0	0
NOP2	1552.1	3836.15	6357.9	551.3	4184.95	3269.5	0	0	0	0	0	0	10457.2	1232.85	2773.15	10587	514.71	4625	1028.77	1505.9	1827.56	4647.8	166.93	1740.35	6448	3400.75	3023.2	20833	4017.95	10602.3	3200.5	16041.5	7266.05	0	2268.5	2416.7	1591.3	956.235	1125.5	0	0	0	0	0	0	446.99	16661.5	5641.45	216.98
NOP56	565.805	5104.85	3603.4	0	2921.25	4164.45	0	0	0	0	0	0	0	0	0	2074.45	0	603.595	0	0	0	2949.7	164.325	1044.4	5104.6	2766.8	0	10723.5	526.98	4797	0	0	0	0	2920.95	2981.95	1641.71	411.465	870.625	726.83	0	466.2	0	0	0	556.56	1965.4	1427.84	0
NOP58	1703.55	19435	17672	1243.09	10458.1	12715	458.595	0	365.15	554.925	0	413.775	755.705	628.215	720.66	2061.6	240.19	1064.65	9030.1	272.77	1135.39	12671	659.62	1285.75	20303	8675.45	461.79	16717.5	1415.65	7821.75	0	0	0	3441.47	13051	14689.5	7037.4	4240.75	6948.1	1220.17	0	706.17	1091.89	0	319.4	56.704	2077.65	1543.83	211.21
NOP9	105.434	12007	15693.5	46.565	7518.75	9818.2	0	0	0	0	0	0	0	0	0	0	0	0	0	0	0	0	0	0	13212	2479.5	0	6464.85	29.6205	2244	0	0	0	157.92	5772.35	11222.4	1911.16	1919.25	2124.7	260.975	0	225.855	0	0	0	0	0	0	0
NOSIP	3372.25	3407.7	3413.25	4055.2	5037.85	4337.25	0	0	0	4026.5	1570.5	2045.8	0	991.65	853.3	0	0	0	0	0	0	0	0	0	950.47	934.85	901.915	1420.3	1380.75	1673	0	0	0	0	3359.5	2343.1	0	4183.65	3508.45	0	0	0	2143.2	1336.49	1479.3	1784.55	775.985	390.07	0
NPM1	130360	309375	191515	0	0	0	0	0	0	0	0	0	0	0	0	0	0	0	0	0	0	0	0	0	0	0	0	0	0	0	0	0	0	0	0	0	0	0	0	0	0	0	0	0	0	0	0	0	0
NTPCR	3017.4	960.26	5092.85	0	771.25	4638.35	0	0	0	0	0	0	1296.1	1454.95	907.795	0	0	0	0	0	0	0	0	0	665.01	522.85	671.77	3030.25	2279.85	3381.6	0	0	0	0	0	0	0	0	0	0	0	0	0	0	0	621.915	797.285	322.08	0
NUDCD1	14327.5	12892	12749	31331.5	2966.8	7441.05	6732.2	4696.75	6268.15	1943	4931.5	1869.2	1167.01	13468	7629.6	2030.8	3012.95	1467.85	17400	12432	12431.5	27060.5	8812.75	8623.5	59098	27894	9085.8	19603	22857	18751	479.65	819.44	993.665	15148.5	7979.45	10134.1	41876.5	1485.7	6199.9	5626.45	4113.15	4475.4	4136.45	3613.2	4252.6	14439	724.805	7306.55	12241.5
NUFIP2	2105.3	337.31	1010.33	0	0	0	0	0	0	0	0	0	0	0	0	0	0	0	1770.7	496.455	389.56	0	0	0	1159.8	372.13	561.395	398.9	438.775	1050.96	0	0	0	0	0	0	0	0	0	0	0	0	0	0	0	444.03	441.595	3238.8	0
NUP107	1029.7	3599.95	2685.45	0	3691.9	3629.4	0	0	0	0	0	0	1356.95	1109.86	1583.55	830.4	7138.45	1822.55	0	0	0	0	0	0	2140.85	4121.75	6268.85	4004.85	2429.15	3166.85	0	0	0	0	1503.45	1630.6	3588.3	3044.9	2977.85	0	0	0	0	0	0	2027.4	1839.1	2176.3	0
NUP205	12631.4	3524.3	6623.05	6272.25	12442.4	2179.1	0	0	0	0	0	0	0	0	0	0	0	0	0	0	0	0	5620.55	3466.65	0	0	0	66048	652.58	9739	0	0	0	0	1886.1	3716.05	6716.2	1830.35	4162.2	0	13754.6	3334.7	2078.2	7536.6	1283.9	0	0	0	0
NUP43	1702.3	3903.85	3758.65	1243.5	3105.35	3390.8	0	0	0	3733.35	0	714.72	666.29	1515.7	1325.3	1171.75	6165.9	2767.95	2410	872.05	1006.3	1839.1	1513.9	2496.9	4152.9	5581.85	8127.65	12279.5	4610.1	7037.25	0	0	0	0	3066.9	3617.35	3589.25	5627.95	2435.9	421.81	0	1349.25	1493.8	0	982.74	0	0	0	0
NXF1	577.21	2230.05	4249.65	0	2093.15	2102	0	0	0	0	0	0	1037.37	2170	1988.7	0	0	0	0	0	0	0	3296.95	1690.75	2914.25	2445.9	1873.45	2287.9	2992.55	2813.2	0	0	0	0	2011.1	4693.6	2440.55	3387.75	1625.29	1777.75	0	1832.1	0	0	0	1553.95	2062.4	1443.25	0
OLA1	1791.3	30302	25823	7016.2	15481	24720	15784.5	0	7773.4	7907.85	515.06	6058.9	708.165	2237.3	1403.55	1720.35	3607.8	3326	3897.3	11619	9293.15	1774.51	16768.5	15960	9910.05	4101.25	2433.75	5727.7	786.81	3376.65	0	0	0	518.675	11974	19346	2779.65	10977.5	12224.5	5721.35	1029.23	9707.15	13975	0	12123	3075.3	1123.95	1592.85	2101
PAF1	4968.05	6979.85	5696.25	1687.95	5868.35	5568.1	2316.8	4007.95	3030.3	1726.63	2158.95	2832.05	7656.45	8305.15	6980.9	6101.95	1125.95	3756.75	3275.65	4392.75	3827	1861.5	4476.15	3197.95	5542	3853.8	3640.25	4547.3	6906.3	6242.3	0	5940.3	3688.75	0	1821.95	5464.15	420.5	6330	4185.75	899.33	1071.1	2512.45	1259.27	3478.65	1172.06	5347.8	8829.05	7229.95	4494.65
PAK4	256.69	2562.8	1864.05	0	0	0	0	0	0	0	0	0	0	0	0	0	0	0	0	0	0	0	1068.72	714.28	0	0	0	0	0	0	0	0	0	0	1165.85	2181.7	4043.85	1816.8	1321.7	0	0	0	0	0	0	0	0	0	0
PARP1	3573.3	1906.75	1924.05	2415.55	2540.5	3476.2	0	0	0	1099.75	1527.2	746.32	1306.2	2696.55	1753.65	3257.3	3763	4593.85	0	849.3	972.275	1146.6	3501.2	3163.95	3759.85	4324.4	2479.35	13080	7108.4	6779.55	0	0	0	6920.4	1995.95	4451.25	11621.5	5281.7	4075.45	372.23	1084.7	831.465	0	0	0	449.31	685.11	684.22	78.139
PCID2	2879.55	4467.15	522.455	1613.8	1935.65	2759.8	489.52	0	1062.28	4758.75	1820	733.46	4414.2	1640.26	1288	2574.2	1933.6	2572.65	1244.95	1225.15	1135	2088.6	1989.8	2418.15	4159.75	1744.1	692.61	2380.7	1813.55	1638.3	0	3748.9	4411.45	0	0	0	5201.5	4266.9	4866.55	0	0	0	2078.25	0	1014.21	0	0	0	623.75
PCNP	1078	5151.05	7715.8	1238.7	9003.3	5290.3	2253	14272.5	6380.95	11064.5	11920.5	8295.65	15881.5	9389.05	10874.5	6676.35	5314.3	6115	2462.3	6184.25	5338.1	5035.3	3700.25	6669.45	10206.9	12625.5	13856.5	19163	13403	15907.5	3635.95	11683	10215.3	0	6936.25	3702.45	502.46	11096	4901.55	1451.7	0	1814.65	3562.05	2271.4	3337.1	12535.5	13570	16992.5	9958.65
PDAP1	106145	150880	93422	53790	154235	114690	91601.5	95596.5	78274	52708	87984	90336	114860	65376.5	87385.5	102230	79857.5	94056.5	84852.5	51451	44916	84075	51966.5	38110.5	59494	64695	66209.5	0	0	0	95130.5	115390	128225	75873.5	101380	80493	59499	67334.5	90388	70914	100292	61358	53491	118785	56883	61677.5	86913.5	75101.5	66067.5
PDCD10	10289.3	2393	4097.9	6579.5	7369.45	6657.7	5344.9	7300.55	2306.1	8882.25	4578.3	9765.65	5318	4934.3	3505.45	3493.75	8791.1	4138.25	6899.4	2403.3	3091	0	7172.3	2966.25	7056.3	6282.45	6342.95	19988	7541.1	13677.5	6323.75	4504.6	7258.8	0	5684.85	2081.9	4154.05	6461.35	6658.6	6754.45	6045	4048.75	8705.9	3103.4	4039.55	4533.35	2438.65	3686.7	6068.65
PDCD6	652.5	3599.9	1932.6	631.035	1275.2	1804.7	16722.5	523.72	1841.35	24637	544.495	25352.5	884.03	1756.9	3970.1	1483.45	0	1074.59	0	21660	20882	0	24125	25123	1343.85	743.11	255.88	1611.5	1050.56	776.63	0	0	0	0	1677.6	1225.69	640.025	1758.95	1685.65	13074	0	5208.65	14719.5	737.18	10310.5	921.41	1083.93	914.245	681.735
PDIA4	733.05	16962.5	10483.6	7860.3	11303.8	12363.5	25402.5	614.55	16452	6709.3	596.875	11836	1394.34	5080.35	3957	5332.85	11209.5	7524.45	0	29650.5	20535	0	56355.5	46575.5	8801.8	7095.2	5295.2	8087.5	2150.4	5161.65	0	2036.74	388.19	1893.6	12490.5	14375	1327.8	9464.1	17505	24801.5	3282.8	17592	37422	1030.11	29166.5	7340.75	2277.05	5027.45	5843.95
PDS5A	1592.6	2341.2	1266.88	1211.2	1332.67	1419.3	0	0	0	0	0	0	0	0	0	0	0	0	0	0	0	0	0	0	0	0	0	4528.9	0	1125.2	0	0	0	0	2100.1	1076.46	0	898.01	905.21	0	0	0	0	0	0	0	0	0	0
PGK1	21920	45303.5	40441.5	38930.5	41182	53584	62313	17460	34196.5	33093	21499	40857.5	0	0	0	20093.5	35584	24503.5	25220.5	51967.5	44811	26273.5	65714	71935.5	24661.5	27723	30248	33053	25985.5	30521	0	0	0	16276	36494	50283.5	26827	50398	41655.5	52159	27321	50187	76760	22393.5	57982.5	34992	16821	23661	30721
PIP4K2C	13016	44335.5	29905.5	9425.25	34959.5	26771	4308	486.455	1399.9	9343.7	1895.85	6765.15	3428.3	4452.05	3283	2859.7	3054.4	2073.5	11306.5	1972.7	4090.05	13627	1924.35	3854	26755.5	12534	4950	14968.5	6210.9	10258.2	0	0	0	13323	38672.5	27148.5	20768	34108	27176.5	8386.15	1387.12	5248.6	6346.95	4450.2	5474.45	3806.2	3153.35	3079.35	3731.9
PKP2	5728.8	2299.85	4493.7	3468.1	1921.2	4887.95	4329.75	7431.8	5273.25	5183.15	5406.85	1931.8	4653.65	4338.95	4878.25	4001.2	1632	3189.45	5744.95	5355.1	5083.7	8724.6	3974.4	5432.4	4133	4675	4713.45	38200.5	8071.8	22809	9634.4	5499.4	7904.25	6901.9	10367.2	10364.5	10868	11595	7626.95	4415.65	3956.85	6687.35	2278.25	1999.45	4224.1	5375.95	8392	7675.15	3763
PKP3	7642.45	21730	18937	7059.3	15149	17560.5	3250.65	4694.55	3260.45	3046.9	7496.5	6088.05	5823.05	5605.25	6087.15	6135.45	2256.3	4384.85	9472.9	6864.3	6704.1	11684.5	9352.55	8200.95	5875.95	5405.9	4632.3	4598.5	9022.3	7168.6	10431.9	6091.4	6657.3	13795.5	14799	17999	19953.5	13830	12118	5193.65	7252.25	3923.9	1552.4	6068.1	3422.2	4819.05	4424.9	4577.25	2626.4
PLRG1	1563.85	2839.55	1734.9	1860.3	2159.4	1698.15	0	0	0	957.59	3426.45	240.67	1381.51	1869.35	2136.45	2196.3	1853.05	984.765	5150.5	484.27	704.835	7070.95	1182.05	634.97	1245.1	2366.05	2088.7	1385.95	6653.5	1311.85	1538.4	701.19	993.35	2038.3	2565	2364.7	4916.3	1180.6	1181.93	284.65	1778.55	424.155	0	0	0	2599.75	2240.95	3382.4	695.82
POGLUT3	1403.15	988.67	1413.23	4714.9	1976.34	3825.8	3806.85	0	2397.4	964.74	0	2478.65	1035.7	8369.85	5364.05	3161.4	9140.25	4514.2	0	6107.05	2725.3	5893.9	12453	12083.8	0	4684.25	8247.7	398.78	4873.65	2366.3	0	0	0	0	3651.05	3478.45	2685.55	3921.9	4640.55	5849.4	3402.15	4982.35	6173.35	9896.5	4632.9	5716.55	898.66	4204.65	4385.55
POLD2	3569.15	0	1432.5	4015.55	927.82	1528.05	0	0	0	0	0	0	992.84	959.625	1091.08	1550.35	0	554.375	0	1799.55	1398.7	0	2618.45	2295.4	0	0	0	315.515	66.446	552.94	0	0	0	0	509.13	912.105	1409.6	1066.44	651.85	522.735	3842.35	1503.94	1688.25	0	1626.15	0	0	0	0
POLDIP3	3790.65	3241.05	3750.7	2958.15	1047.81	2891.9	0	0	0	0	0	0	1045.8	1869.8	1392.9	1489.2	3563.3	2291.1	3300.5	927.37	1515.1	5945.9	0	895.62	4876.7	5684	4230.75	33560.5	3916.5	17643	0	4031.85	3584.15	6752.5	1636.19	2734.5	4202.4	748.315	308.48	0	0	0	0	0	0	2411.65	1845.15	2242.3	1368.7
POLR2E	4532.95	0	5364.35	5446.35	0	3222.25	0	3591.75	2556.6	0	0	0	4625.15	5141.1	5353.1	4827.4	6947.85	6113.3	5810.2	2895.5	3735.9	0	0	0	5180.5	7173.7	7910.85	5818.1	5912.7	6872.7	0	4216.1	4843.7	0	0	0	0	0	0	0	0	0	0	0	0	4833.15	5351.1	4209.45	3928.15
PPIF	6731.7	7942.15	6494.6	8951.45	6645.55	7727.05	2676.5	10162.4	4631.55	2998.2	7343.35	3640.6	4982.1	9628.15	5618.4	4904.35	8847.4	5260.2	9378	2732.95	2941.15	14079.5	3196.3	2884.55	9065.25	8542.45	10442	31986	11358	22151	10989.5	2687.75	0	4842.3	6316.55	4680.3	3086.9	6195.8	6765.75	836.755	2590.6	2557.85	3114.25	2017.5	1950.3	8069.65	6146.95	5246.3	8088.85
PPIL1	6425.8	3897.9	6610.45	5792.1	2418.8	5371.1	1539.25	5831.2	3059.8	3159	8486.65	254830	7199.65	3477.5	5146.2	4227.65	3076.05	3782.95	3408.75	3211.2	3340.9	6928.1	3151	4424.3	5125.6	4636.7	3313.65	3676.2	4475.25	4190	8036.5	5408.3	8997.35	3270.7	1245.35	5878.55	4535.6	19692.8	1382.2	1592.1	5362.3	951.985	3585.1	2409.9	3172.65	5585.6	5632.4	4459.35	3872.45
PPIL4	16599	21207	9084.3	0	71074	29658	0	0	0	123570	0	86675	20469	9514.7	2448.8	0	0	0	0	0	0	38646	53184	13362	0	0	0	0	0	0	0	0	0	0	0	0	21346	238785	8918.3	255880	0	111915	100318	0	67668.5	0	0	0	0
PPM1G	26260.5	126300	86804.5	13414.5	114975	67978.5	18930.5	13066.5	15141.5	8790.65	15442.5	31168.5	12583.5	6328.2	9901.7	9321.95	3904.2	6418.05	60207	7158.55	12950	51017	10940.5	10909.5	81293	40023.5	5158.95	59313.5	6856.8	30446.5	2035.05	10527.4	10972.5	11463	76672.5	71225	13834	64001	65795.5	24182	3079.2	15711	20612.5	14274	16635.5	3896.1	8336.65	6894.2	3518.95
PPP1CB	6901.65	0	2516.4	0	0	0	0	0	0	0	0	0	6817.5	5288.7	4986.1	4900.55	5754.6	5722.65	5005.3	2219.45	4031.25	5349.1	0	2534.1	5832.9	6641.95	6743.65	7862.8	5256.95	5951.2	1790.5	10418	10417.5	0	0	0	0	0	0	0	8231.75	2449.35	0	0	0	8345.85	6593.35	8816.9	6806.85
PPP1CC	4767.95	4657.45	4720.95	4683.3	6350.55	5914.7	3183.7	3377.7	1974.4	8690.2	3323.5	5506.65	5674.75	4221.65	4509.3	3966.6	4259.6	3767.65	5625.2	3444.8	3699.9	2887.6	3565.8	3542.05	4001.1	5433	5289.2	6920.75	5006.75	6266.5	559.98	7735.5	7618.7	1494.1	6933.05	3316.8	4907	8165.75	5733.35	3749.9	4555.05	2541.9	3275.25	1964.05	2117.2	5008.7	4281.85	4332.75	3807.5
PPP4C	973.42	1898.2	465.115	0	2562	1101.94	0	0	0	0	0	0	0	0	0	0	0	0	0	0	0	0	4246.85	1313.7	0	0	0	0	0	0	0	0	0	0	1715.8	987.23	0	1716.8	3760.5	0	0	0	0	0	0	1590.55	979.87	788.25	0
PPP4R2	790	3339.8	2066.05	0	2091.05	2144.1	0	0	0	0	0	0	0	5123.55	1600	940.59	2935.4	1352.15	0	0	0	0	357.19	725.835	1220.25	980.105	3927.55	3222.65	5422.5	1436.25	0	0	0	0	2976.5	2036.05	0	1106.31	2137.4	0	0	0	0	0	0	2722.4	986.085	2221.65	2054.25
PPP5C	2881.2	2338.2	1993.15	5795.4	1811.8	3981.1	4356.95	3021.9	2268.6	1562.05	1707.75	3487.3	1943.1	5487.45	3465.45	2029.4	7112.25	3987.55	0	5482.4	4243.05	0	10860	9735.1	1322.7	3649.7	6113.9	1366.5	4097.7	2473.5	0	0	0	0	653.25	3725.2	704.06	1477.56	580.175	4673.2	4382.6	2840	6962.5	2175.6	5019.9	6303.7	2009.8	3453.35	5328.95
PQBP1	3277.45	15207.5	9228.8	2809.5	11473.5	6303.25	0	0	0	7152.15	6784.4	5691.2	5470.3	2036.75	3229.5	5728.45	2074.4	4106.65	5722.2	1650.2	1032.8	8865.55	1655.15	0	3783.25	4085	2175.75	0	0	0	6453.8	4428.25	6924.65	0	15488.5	8441.7	2759.7	13896	7998.2	0	0	0	0	0	0	3298.8	4679.8	3323.5	2188.25
PRDX1	128260	143065	160560	226985	139655	134195	148970	273270	158765	229495	309135	187360	209510	279930	255075	0	0	0	157460	225015	256555	183695	224175	169205	137065	133985	112985	85227	186105	145460	345180	108620	185065	182360	147770	114460	86440	159830	174475	141750	143530	116655	160910	156550	143030	251675	103315	156725	291665
PRKDC	8992.6	34853.5	28410.5	1436.48	22284	22876	1002.85	0	1261.55	1040.4	0	2732.1	5547.35	2496.35	1687.85	5023.45	456.225	1533.25	10659.9	4072.75	6062.6	21579.5	5574.1	6967	48873.5	18681.5	6158.7	43067	6383.75	20095.5	0	7646.8	1330.18	4757.75	21625.5	34953.5	22836	11049.5	20269.5	5909.55	892.67	1989.3	1837	1654.5	794.23	3068	5183.6	867.275	1022.5
PRPF19	27665.5	24030.5	20292.5	18512.5	20071	17788.5	0	0	0	3357.35	33212.5	7261.6	18375.5	16418.5	14922	14517.5	11288.5	12107	27813	5474.5	6992.45	39414	6524.15	6383.35	19729	20390	19132.5	8354.25	25609	19398.5	33283.5	14585.5	17220.5	29497	22230.5	15041.5	43584.5	20183.5	18838.5	4482.1	33430.5	10617.1	3385.05	24399	8002.55	20650	13220	14941.5	11400.5
PRPF3	1882.45	3390.5	4866.1	285.03	3523.2	2351.2	0	0	0	0	0	0	2595	2447.7	3030.5	4118.1	1193.95	2548.75	0	0	0	2286.9	2166.15	494.565	1239.8	2591.8	2369.65	0	3689.45	1585.75	1255.2	3443.55	3047.1	1393.2	1804.8	2666	1545.3	1100.4	831.165	1162.95	1272.8	0	0	0	0	2361	9021.4	6453.95	0
PRPF4	4486.8	7623.2	8142.85	2289.75	4097.45	3973.5	192.025	2944.5	425.645	657.62	7405.65	817.345	10416.1	15011.5	12174	8938.3	8345.7	7097.55	0	1733.8	1218.85	5195.8	827.28	1129.85	8263.2	11678.5	14913	1906.5	19577.5	9956.55	1718.1	4440.35	1743.14	1591.3	5329.4	3413	3882.5	3006.15	2720.7	533.21	3885.5	1913.5	568.87	5080.1	1035.64	11778.5	14549	13188	7407.25
PRRC2B	6157.6	3256.6	6402.6	5391.2	5463.75	6682.85	2422.75	4117.95	3187.5	426.11	3726.9	428.46	9162.1	10180.4	7371.9	5863.45	13454.5	8460.2	0	5545.6	3689.6	3739.1	3031.55	4418.3	4282	8282.1	16461.5	2913	13176	6907.7	3500.8	9199.3	8823	5246.95	1969.55	4097.95	5924.95	2678.9	3706.2	0	6773.65	7010.7	0	4047.95	6289.65	6921.85	8102.55	7444.35	6674.1
PSMD5	28960	16206	14274.5	20797	24993	20315	0	0	0	0	0	0	16578	28371.5	23633	18952.5	36948	27015	0	0	0	0	12204	9801.8	1840.15	18225	37220	0	0	0	0	0	0	13527.5	16937	11802.5	16555	11408.5	19015.5	1741.5	32077.5	9842.8	3731.35	21480.5	6743.1	16837.5	19940.5	18560.5	15318.5
PSPC1	3461.85	7228.3	7722.6	6120.5	1533.88	5293.05	0	0	0	0	0	0	2771.5	2508.95	2757.7	3526.2	2529.4	3555.05	7555.3	2931.45	2899.1	9250.3	1554.65	2428.95	7248.6	5641.6	5621.5	5547.4	5078.65	5007.85	1243.6	2474.2	2133	852.53	3551.85	5532.25	4371.4	347.655	2229.3	629.46	1623.1	359.78	0	0	0	1923.6	3205.5	2610.9	738.06
PTGES2	246.06	8701.4	5126.15	1548.2	5026.75	5181.35	5519.8	0	2427.45	5195.6	0	2060.7	937.28	2069.4	1420.4	1080.36	2913.85	1546.65	0	2001.45	1999.1	0	2889.9	3074.45	2376	4335.1	3429.35	2396.95	2911.3	5639.6	0	0	0	0	7311.4	6649.4	2370.8	6169.2	7197.85	5865.5	0	5841.8	3801.55	0	5055	2153.4	711.1	1392.23	1340.4
PTPN11	3243.5	1268.05	2338.7	2556.05	8142.55	1659.4	0	0	0	0	0	0	3690.4	2457.9	1784.75	2364.7	1180.6	2055.6	0	1976.3	805.705	0	1323.17	1738.8	1157.3	1410.75	1948.3	1248.8	2587.6	2319.9	0	0	0	0	0	0	1545.8	556.285	1863	0	0	0	0	0	0	2800.9	3989.45	3184.9	1958
PUF60	6499.75	18841	13825.5	5653.35	14111	10294.6	0	0	0	0	0	0	8263.2	9578.75	9118.1	8875.5	6251.35	7519.05	28222	4493.15	7461.4	22964	6615.15	6189.6	26848	18020.5	13128.5	13180	12079.5	13003	12820.5	11169.5	11929.5	0	0	0	0	0	0	0	0	0	0	0	0	7214.95	9998.35	8776.05	0
RAB13	2691.85	5315.85	2756	1425	6513.05	2231.91	0	0	0	1934.36	0	1042.17	2347.25	2662	2833.4	2470.5	999.34	2044.15	2986.5	1626.8	1573.4	2415.9	0	884.22	5900.6	5188.2	4079.3	4327	2763.8	3415.2	0	0	0	0	8415.75	4232.6	1418.2	5454.48	5614.25	0	0	0	0	0	0	3171.35	1851.15	2157.55	1365.6
RAB1A	10510	5782.55	5355.25	12552	14998.5	5883.05	22420	10439.5	15941	9947.2	6866.95	14264.5	6970.1	5730.8	5991.5	6129.7	10675.8	9016	10809.5	19224	18603.5	7855.7	19810	23067.5	19412	16317	8935.45	64651.5	6243.1	27614.5	6786.55	5401.85	6200.95	7270.15	18615.5	10911.1	7515.7	14424	30512.5	21424	8947.1	9539.3	14242.5	6296.25	21114	9917.95	5518.75	6833.25	10755.5
RAB5C	1709.8	3316.3	4479.7	2987.35	3106.6	8958.2	10901	6447.3	8215.15	1378.25	1366.6	7123.9	3708.3	4065.65	4305.5	3585.2	6780.85	4676.35	705.94	4876.05	4270.9	582.69	6140.25	7538.8	7941.55	7963.75	7253.25	25938.5	4231.25	13929.5	0	3480	2023.4	0	4861.7	11692	533	2671.75	10403.7	13083.5	1472.7	9115.95	6045.2	0	7814.7	6435.75	7352.8	6563.4	6971.3
RAB8A	2011.9	7965.4	6004.05	3142.7	8302.05	7781.8	3291.3	0	1840	4895.6	0	4768.15	2289.05	2209.95	2771.1	1898.55	2260.05	2176.65	3914.9	1047.94	1383.9	3443.45	2863.25	2229.45	3625.65	2926.85	2386.35	4734.95	1867.9	2955.75	0	0	0	0	9640.3	8480.6	2321.15	15814	5688.65	4652.35	0	3777.05	0	0	0	2143.2	2805.2	2821.9	2031.8
RAC1	12568	10453.2	16226	9354.8	4709.1	12817	11210.5	13055.5	12490.5	16215	11190.5	4868.8	18137.5	6664.25	9390.65	10812	5538.45	7627.85	13658	9097.5	9945.9	19136	8145.75	9369.45	21930	15295	10105.4	16874	6721.55	11170	17230.5	13175	11299.8	6047.7	11167	16408.5	8904.55	13992.4	18940	7258.05	8323	13407.5	5754.75	6177.9	8974.35	9269.5	12959	10853.5	8018.45
RAD50	4294.8	7313.1	5554.8	2773.4	4447.8	1864.55	0	0	0	1310.7	1242.5	1354.85	2419.64	1013.89	2409.05	0	0	0	0	876.865	545.42	666.55	4178.25	1224.3	2146.2	832.545	571.99	168.82	695.76	739.065	0	0	0	6419.9	8931.4	7002.95	22700	6711.4	6266.85	1377.35	2651.9	1392.38	573.17	378.77	622.245	987.69	0	544.1	1869.8
RAE1	14564	11624	17676.5	16151.5	6606.75	12502.5	9804.35	12255.5	8989.55	2289.35	13149.5	7948.55	4035.6	14753	10338	6975.05	13896	7997.8	11699.5	10013.8	10311.5	15666	6191.4	9862.4	18132.5	18540.5	23181	12575.5	19860	18741.5	9204.85	5672.9	5855.15	10809.5	9108.15	13755	14604	4778.55	8751.7	8567.75	10478.5	10997.5	5725.65	9502.25	8981.6	13805.5	7103.8	7674.9	10006.9
RAF1	37573	23623.5	41599	20391	25820	24592	10992	8272.45	9642	7214.45	7763.55	9090.85	12365	1513.05	5449.8	6740.8	337.085	2809.5	37136	0	4126.5	46713.5	353.97	1187.7	65958	24927.5	343.105	33617.5	1617.3	16188.5	6381.85	12543.5	11424.5	34396.5	22442.5	26438	35035	8700.25	14291	13625	2400.35	13488.5	11329	13162	6966.55	100.18	4759.05	2737.25	539.91
RALB	6867.85	8623.85	4037.7	1435.55	11607.5	6910.8	0	0	0	13062	1418.4	4809.55	0	0	0	0	0	0	4097.4	3669.6	2951.3	11269	3423.8	1859.5	12091	3097.6	122.55	3864.3	461.965	3485.25	0	0	0	4408.9	18011.5	7948.75	1319.2	23853	17425.5	7117.7	920.34	4253.45	3361.5	0	1061.74	0	0	0	0
RANBP1	454.27	38691.5	35315	1612.85	25131	21204.5	10944	0	6136.1	12049.5	697.74	7820.85	1317.37	3611.4	1223.06	623.315	5702.95	3216.45	3995.95	20481	15724	3630	29629.5	32977.5	33460	21402	5509.6	24027	2002.45	15053	0	0	0	0	22781.5	23026	1861.3	31671.5	27217	8427.95	0	7359.6	18915.5	2329.05	19353.5	2279.8	754.82	1366.67	819.815
RANBP2	2581.95	18502.5	15749.5	4644.45	10308	9756.4	2186.55	0	1081.43	1171.72	0	1404	1110.13	1841.1	1006.36	970.72	4502.65	1942	2662.55	1621.25	1296.27	8250.6	2717.4	2226.6	72068.5	31418	5355.3	13283	3571.55	6489.95	0	0	0	1457.6	11094.5	12279.5	8495	5562.7	7358.3	1744.6	0	550.798	1940.65	0	1753.15	1800.05	875.405	1159.98	1306.4
RANGAP1	16719.5	47383.5	49292	13488.5	28891.5	33014	0	0	0	0	0	0	0	0	0	0	0	0	38868.5	8467.55	11079	81652	12204	15695.5	161045	78248.5	17474.5	41231.5	17013.5	31295.5	0	0	0	10617.9	25990.5	36035	41854	15800	21945.5	16450	5223.7	12504	12920	5780.85	13083.5	0	0	0	0
RAP1GDS1	642.365	17787.5	14236	269.425	26520	23607	1169	3.5122	115.192	458.575	0	211.115	0	0	0	0	0	0	488.775	0	99.44	181.536	65.32	50.7115	6840.7	1958.65	0	3658.9	0	1405.45	0	0	0	0	22399.5	18586.5	1082.25	14071.2	15734.4	705.78	0	690.705	689.185	0	637.22	0	0	0	0
RBBP7	2752.75	3724.9	1753.25	4127.25	5255	4353.6	1490.6	1513.6	2392.6	3257.55	2706.5	1796.7	4644.25	4660.25	3477.35	5477.15	13904	7715.2	2085.4	3360.4	2369	0	8940.35	4195.1	2500.2	6365	12717	1957.45	5360.2	4233.45	0	3440.4	1494.95	0	6141.05	2707.75	2449.8	8721.05	5027.95	3655.3	5748.05	1657.3	3815.25	3552.6	1905.1	4360.25	5430.35	5279.85	4918.15
RBM14	8402.85	11174	11062.5	6855.3	8999.15	10516	0	0	0	0	0	0	4399.25	5639.65	4703.9	4722.7	9500.5	5871.3	6654.95	4802.4	4084.15	15516	5105.75	4865	10938	11347.5	12368	23445.5	9484.35	17170.5	5517.85	7696.7	10516.2	4725.8	8375.7	8158.35	5476.2	3775	7258.2	0	0	0	0	0	0	4998.3	9658.3	8258.3	0
RBM17	3020.05	14328.5	5920.4	1439.15	4981.2	3381.75	0	0	0	2165.19	6602.05	446.185	7329.1	11318.5	6710.6	6196	1836.5	2750.5	1725	922.265	648.365	4928.75	586.54	580.315	14343	12458.5	12124.5	3321.5	21026	11312.6	6492.4	2746.7	4340	2858.1	9352.5	4867	3755.75	4159.75	4494.65	451.26	3407	446.16	449.55	5425.25	437	5733	11082.6	9686.2	2969.2
RBM22	1557.7	3337.25	1615.75	1042.9	4002.2	1428.82	2617.45	0	1324.47	0	0	0	2717.75	1434.65	2172.75	1705.1	1494.55	1448.75	0	0	0	0	1375.35	1179.55	1457.1	1410.8	1841	3089.4	2150.15	3088.95	0	0	0	0	2574.65	2663.9	0	1407.4	2674.45	1088.09	0	2206.25	3616.65	0	2352	1719.3	1890.65	1566.35	0
RBM27	961.07	2550.85	1478.6	1747.5	1702.75	1212.85	0	0	0	0	0	0	1010.47	646.5	1178.41	1206.36	1215.9	893.415	0	0	0	2383.95	1518.05	1179.8	1585.3	1377.7	1032.21	896.06	844.93	803.35	0	0	0	0	1464.6	1545.95	6901.7	984.915	1487.35	0	0	0	0	0	0	910.34	523.625	889.53	0
RBM39	2135.25	8701.55	13795	1539.74	3124.9	8001.65	4038.8	0	1765.4	1156.65	0	5257.45	4839.15	3291.2	3377.4	4555.9	601.2	2862	5185.35	3708.85	2546.45	5571.95	3354.95	3969.85	6043.2	5033.65	3133.7	5345.25	4280.05	5159.5	0	6351.55	4111.55	3922.9	2634.95	7865.85	12891	1249.48	3504.65	5069.9	6541.55	6858.35	4738.45	3214.65	6496.75	1671.05	5213.5	3992.55	0
RBM42	1235.3	4897.25	2677.2	526.96	3598.2	4090.2	0	0	0	0	0	0	959.09	2436.3	1431.2	2479.6	1884.2	1863.85	0	0	0	0	0	0	1579.45	1274.25	2563.75	1231.5	3865.3	2467.8	0	0	0	0	2865.3	3565.9	2440.3	0	5367.05	0	0	0	0	0	0	1363.35	4108.45	2949.3	0
RCC2	4659.9	10081	10596	6068.55	4558.65	6779.05	4728.1	3129.25	2813	4224.1	6835.45	4450.55	1654.87	3437.05	2887.95	2552.85	3836.4	2710.25	9453.9	10287	7323.85	14618	7723.9	7203.05	7052.55	3533.9	2305.5	3566.15	3465.7	3238.85	4631.6	5893.55	2329.45	10076.2	6125.95	8813.4	20995.5	4906.65	4556.25	3659.5	3355.8	5646.15	3045.15	4456.55	3921.1	1638.25	616.48	1854.8	834.055
REEP3	3466.15	2944.95	3388.1	1647.1	1582	3750.25	0	0	0	0	0	0	0	0	0	0	0	0	0	0	0	0	0	0	8020.9	2383.8	0	0	0	0	0	0	0	2329.8	3337.7	3036.45	2871.35	4194.1	2979.55	0	0	0	0	0	0	0	0	0	0
REEP4	504.3	1146.6	1737.75	0	0	0	0	0	0	0	0	0	0	0	0	0	0	0	0	0	0	0	0	0	3116.3	1302.1	0	0	0	0	0	0	0	0	0	0	0	0	0	0	0	0	0	0	0	0	0	0	0
REEP5	1662.85	25980.5	15143.5	5755.3	26966	13872.5	9862.6	0	8867.25	9582.15	910.7	13540	0	1872.1	1385.35	1566.8	2815.55	2162.35	1636.5	5208.45	5433.7	0	8554.05	6558.55	12833.5	7050	2545.45	12453.5	1422.15	5843.05	0	0	0	1015.1	21691	18112	3742.3	18681.5	14893.5	10614.2	1324.7	7311.8	8172.55	0	7771.3	2708.3	1444.7	2272.5	2528.2
RGPD3	871.385	1786.45	4421.15	1115.95	0	1775.65	0	0	0	0	0	0	0	0	0	0	0	0	0	0	0	0	0	0	0	0	0	6767.25	0	5377.6	0	0	0	0	0	0	0	0	0	0	0	0	0	0	0	0	0	0	0
RIN1	11719	60234.5	48937.5	9870.25	38267.5	43669	5470.7	6071.8	6256.35	1479.9	7259.1	6056.55	4423	261.723	2379.65	1613.65	0	611.585	14050	158.04	285.84	19145.5	20.1115	1677.15	40151	15899.5	336.26	26561.5	876.585	13838.5	2859	3518.45	3876.9	12770.2	41577.5	56693	24027	6829.55	23755	12345	1515.24	11131	10038.7	15650	11155	426.39	4313.1	2233.1	426.3
RPL10	12554	23166	22186.5	8337.7	22614	21887	0	0	0	0	0	0	0	0	0	0	0	0	30557	7412.95	10009.3	36229	8965.55	11506.5	0	0	0	0	0	0	0	0	0	0	0	0	0	0	0	0	0	0	0	0	0	0	0	0	0
RPL23	61847.5	74019.5	57387	41217.5	80316.5	59985	0	0	0	79606	25656	47013	0	0	0	0	0	0	90418.5	24367	28103.5	102055	34753.5	27939	0	0	0	0	0	0	0	0	0	62172	61981.5	52703.5	63562	56217.5	71981	63409	25824.5	39528	0	0	0	0	0	0	0
RPL38	52525	75268	58401.5	34045.5	90358.5	72506	66987	30282	38341	141075	26841.5	83269	0	0	0	0	0	0	0	0	0	0	0	0	0	0	0	0	0	0	0	0	0	68989.5	61728.5	43702	62066.5	83191	68519.5	72511.5	26754.5	45898	56637	33120	39228.5	0	0	0	0
RPL5	29971.5	90969	74793.5	20999.5	91870	67753.5	0	0	0	0	0	0	0	0	0	0	0	0	81464.5	12672.5	18989.5	107525	16588.5	18708	0	0	0	0	0	0	0	0	0	38790.5	61600.5	48233	27923	48796.5	42942.5	0	0	0	0	0	0	0	0	0	0
RPLP0	38245	61953.5	46369.5	24033.5	59793	53797.5	0	0	0	42090	12830	42594.5	0	0	0	0	0	0	71589.5	20947.5	24313.5	67778.5	33662	31515	0	0	0	0	0	0	0	0	0	40801.5	49925.5	46760	39587.5	39300.5	49400.5	68465	11916.5	41802	51140.5	15085.5	37812.5	0	0	0	0
RPN1	2818.95	19882	10603.5	1355.5	22688.5	15949	2863.95	336.745	188.235	6643.25	0	4415.85	1392.3	194.14	744.43	1702.45	208.88	762.785	8996.5	545.415	1337.85	14373.5	2320.5	2319.95	17945.5	7826.65	515.445	33757	723.49	14778.5	0	4871.2	594.575	325.73	25654.5	17761	1798.05	26059.5	21352	8469.7	0	3717.25	4576.55	0	2238.1	50.3635	2488.75	531.205	39.906
RPN2	848.035	9082.85	5170.3	237.4	11080.5	9409.75	1759.65	0	254.025	3183.2	0	2894.9	772.88	504.305	496.9	993.62	447.455	664.4	2746.1	943.615	1346.45	1802.37	2108.25	1667.1	10430	5148.2	1074.16	41288	1245.3	18969	0	3366.6	1774.25	0	12669.5	9354.65	737.195	9313.3	11942.5	4677.7	0	2112.15	2496.75	0	1298.85	160.83	4064.8	1296.2	0
RPS15	34630	40793.5	37303	23453	54361.5	42831	0	0	0	0	0	0	0	0	0	54780	18596	40976.5	0	0	0	0	0	0	0	0	0	0	0	0	0	0	0	37818.5	38013	34359.5	0	0	0	0	0	0	0	0	0	0	0	0	0
RPS16	309645	197535	278260	0	0	0	0	0	0	0	0	0	258945	245920	290510	320530	249630	303915	0	0	0	0	0	0	176100	222925	238180	0	0	0	434580	317195	373560	0	0	0	0	0	0	0	0	0	0	0	0	217055	269570	255985	197935
RPS21	76633	77146.5	70781	45135	124165	96769	31784	82310.5	38300	40194.5	75672	48882.5	60145.5	63860.5	64086	39479	84070.5	60374.5	63292	39403	39737.5	82529	42761	38214.5	51943.5	62426	64387.5	0	0	0	118120	71806.5	76132.5	0	0	0	0	0	0	0	0	0	38656.5	60068	38013	60736	57330	61763.5	60935
RPS26	171575	163915	171755	121580	125935	187060	83762	160680	91155	97928	164555	48037	0	0	0	0	0	0	0	0	0	0	0	0	0	0	0	0	0	0	106074	172110	121555	126709	103895	161505	0	0	0	117995	138450	108455	84537.5	180355	93371.5	0	0	0	93261.5
RPS27	337305	320550	338335	235530	240245	333100	211525	334440	224895	0	0	0	342490	248510	303690	303165	258460	273250	0	0	0	0	0	0	203845	225150	238000	0	0	0	344870	413030	423665	315805	167095	259890	264215	246150	220625	214465	297535	221500	129565	304110	169435	216675	322125	276340	219880
RPS28	131465	29061	76058	79259	99930.5	37542	18922.5	172345	53529.5	28032	153675	63531	0	0	0	0	0	0	0	0	0	0	0	0	0	0	0	0	0	0	164445	74081.5	81079.5	119344	57024.5	44193.5	46965.5	125735	52020.5	0	0	0	0	0	0	0	0	0	71602
RPSA	447430	380915	411625	0	0	0	0	0	0	0	0	0	405270	403220	416480	438075	503375	453580	0	0	0	0	0	0	313760	372340	464250	0	0	0	615180	433510	432975	0	0	0	0	0	0	0	0	0	0	0	0	0	0	0	355375
RRBP1	34542.5	28525.5	22029	28824	28334	23914.5	17515.5	12433	12303.5	0	0	0	0	0	0	0	0	0	36800	15339	15751	39659.5	26185.5	23805.5	36064	29273	20428	37535.5	15458.5	26811.5	0	0	0	31073.5	24251.5	21282	19820	24487.5	28184	0	0	0	0	0	0	0	0	0	0
RRP1	2682.8	21176	18613.5	1199.9	10476.8	13407	0	0	0	0	0	0	0	0	0	0	0	0	0	0	0	13031	0	112.439	13893	5152.05	0	10186.9	293.2	3833.6	0	0	0	2805	13544	14921.5	3684.3	2306.95	4001.4	0	0	0	0	0	0	0	0	0	0
RRP12	1972.85	6476.85	5002.5	612.005	6886.85	2272.3	0	0	0	363.58	0	178.82	3266.65	376.69	1175.9	888.93	624.85	1732.1	0	0	0	0	0	0	7700.95	3338.05	0	8631.55	505.21	2586.55	0	2748.15	2886.75	1265.6	6411.35	3581.75	1494.91	1993.75	1749.9	0	0	0	0	0	0	0	4128.3	1707.45	343.22
RTCB	25478	37285	26191	22335.5	30726	26317.5	0	0	0	0	0	0	0	0	0	0	0	0	0	0	0	0	0	0	0	0	0	0	0	0	0	0	0	26656.5	33663.5	26856	35993	21747.5	24008.5	0	0	0	0	0	0	0	0	0	0
RTN4	9897.7	118750	103621	17500	60091	76675	0	0	0	0	0	0	0	0	0	0	0	0	0	0	0	0	0	0	60455.5	25095.5	6950.8	57538.5	5188.15	27756	0	0	0	11035.5	44737	85970.5	17801.5	52364.5	50630.5	0	0	0	0	0	0	0	0	0	0
RTRAF	12330.5	22478	18212	0	0	0	0	0	0	0	0	0	0	0	0	0	0	0	0	0	0	0	0	0	23733	18698	15425	0	0	0	0	33354	23293.5	0	0	0	0	0	0	0	0	0	0	0	0	0	0	0	0
S100A16	3389.3	7879.35	4804	1512.5	9062.75	7339.15	0	0	0	6053.1	0	4553	0	7338.5	3586.35	5759.2	7643.55	2308.75	0	5068	2441.3	0	5966.95	4231.65	0	1841	4935.7	5063.75	6954.85	6295.55	0	0	0	1560.3	7476.7	6105.2	2500.75	16255	11735	3022.8	0	562.355	1810.35	0	842.965	3256.6	3317.5	971.705	5337
S100A6	1493.9	558.58	901.35	0	0	0	0	0	0	0	0	0	0	0	0	0	2720	916.915	0	829.505	2950.8	0	0	0	0	982.47	899.04	0	0	0	0	0	0	0	0	0	0	2046.4	921.365	0	0	0	0	0	0	1791.75	1982.15	1351	0
SAP30BP	27525.5	27959	33683.5	20221.5	16031.5	21912.5	6337.3	25526.5	12065.5	2361.55	57766	11712.5	30266.5	17403	20960	24057.5	11660	19631.5	52365.5	8641.15	13157	62116	7285.95	10921.5	40632.5	28884.5	20922.5	15831	21002	17907	51586	22145	34825	21242.5	14145	16668	27105	10145.9	15928.5	3128.6	33591	11600	3399.75	36138.5	11396.5	20818	19272.5	20606	15030
SARS2	2784.3	12025.5	10618.5	2804.1	14778.5	17744	0	0	0	199.445	0	555.79	3847.75	2918.4	3225.2	4404.55	0	2228.7	805.76	410.21	451.83	0	2359.95	1112.43	4994.55	1570.15	1314.34	1485.3	1889.25	2264.1	0	0	0	1658.01	6361.3	10427.3	2452.7	3418.75	4824.35	2999.5	489	3163.7	2355.85	581.4	1895.55	1128.95	4911.1	2916.55	1414.35
SART1	3761	2897.9	5029.7	0	0	0	0	0	0	0	0	0	8520.9	3705.7	6693.35	13797.5	2850.3	7597.2	2105.05	504.24	909.5	3841.5	0	295.48	5168.05	5394.25	7757.4	1046.7	10430.4	4577.6	4071.4	6104	6231.7	0	1172.01	1907.4	2223.6	859.82	923.225	0	2793.25	872.72	0	0	0	2924.95	25342.5	10819	2704.7
SART3	595.655	7994.8	5509.35	830.815	8459.55	7787.85	2355.85	367.09	976.345	1364.65	323.065	2639.05	3234.9	7826.65	5641.5	5299.25	6183.65	5252.4	0	5752.9	3136.85	0	6787.95	5529.65	1473.3	3930.2	7652.4	575.595	8308.9	3868.55	0	0	0	1129.5	7848.25	7525.25	2457.9	6508.75	5757.55	4797.2	218.24	2800.4	3070.35	559.315	2446.45	2907	5027.1	4190.35	2136.4
SBDS	13057.5	22326	16052.5	12267	29719.5	18433.5	0	0	0	19584.5	5854.25	10130.3	0	0	0	0	0	0	0	0	0	21626	7329.3	6635.9	0	0	0	0	0	0	0	0	0	12762.5	26199	15005.5	8816.1	22483.5	18195.5	13356	7684.8	11229	0	0	0	0	0	0	0
SCCPDH	2611.95	1797.45	1235.35	871.65	3478.6	551.645	0	0	0	0	0	0	556.21	383.87	313.18	375.25	557.11	270.63	0	0	0	0	0	0	12389	3281.35	553.835	5642.85	451.945	392.75	0	0	0	1541.8	1854.45	1216.4	2122.75	3785.8	893.75	0	0	0	0	0	0	383.085	613.48	163.3	0
SCFD1	1249	765.395	1059.5	0	1428.87	1032.85	0	0	0	0	0	0	652.79	1327.6	811.245	1235.34	497.97	865.14	0	0	0	0	1312.05	1197	999.325	753.62	769.645	1919.9	738.88	1474.95	0	0	0	0	933.295	2834.3	0	3636.1	1652.85	2438.9	0	1598.1	2664.3	0	1937.4	792.815	1669.9	1037.7	0
SDHA	1324.2	573.55	1578.6	1091.9	1674.7	853.585	1582	666.95	809.205	4180.6	846.44	4178.3	0	0	0	0	0	0	0	1377.75	533.21	0	7776.7	6074.2	0	0	0	26390.5	372.99	5619.5	0	0	0	0	4539.75	1766.45	1230	18971.5	15518.5	2509.95	0	2261.6	5660.4	0	2360.3	0	0	0	0
SEC22B	3040.9	5373.65	6025.25	0	6976.7	5857.15	0	0	0	3228.8	0	2980.55	3552.4	1201	1919.5	3271.3	1387.15	2254.65	3394.1	1141.86	589.885	6262.8	2991.7	2309.05	10781.5	6423.85	2916	15202.5	2002	9345.6	0	0	0	0	7362.25	6839.5	2816	3321.15	7683.25	5877.8	0	3331.4	4810.5	0	2845.45	0	3936.65	2194.85	163.51
SEC31A	5042.45	13575	5946.5	9675.75	13872	9370.4	4529.05	6985.35	5277.65	3703.4	0	4444.35	2908.75	5016.55	3723	5054.2	7809.4	6924	5117.65	3111.2	6628.4	8411	7179.1	1625.75	6607.85	8883.35	7955	12458.5	2374.04	10264.2	5047.6	1805.9	3423.05	6862.5	17709.5	7864.4	3562.3	11517.5	11397.5	7325.1	0	2047.75	3365.35	1695.7	3162.6	5549.25	3486	4801.5	5522.6
SEC61A1	5218.9	6182.8	4485.65	0	10431	2846	0	0	0	565.465	0	511.025	0	0	0	0	0	0	0	0	0	0	0	0	4320.35	3277.75	0	3494.8	0	642.555	0	0	0	3256.9	11103.5	5054.2	3397.8	7557.75	2667.4	595.055	0	465.835	0	0	0	0	0	0	0
SEPTIN11	3246.9	1090.54	1994.42	0	1634.15	1097.5	0	0	0	0	0	0	0	0	0	0	0	0	0	0	0	0	2045.45	1078.55	0	0	0	752.04	991.81	846.135	1811.1	1900.9	1673.3	0	2103.05	1714.75	0	2445.35	3603.05	1374.2	0	1121.9	1078	1283.2	689.985	0	0	0	0
SERBP1	31944	106975	87345.5	16391.5	143385	86348.5	0	0	0	108225	25302.5	84294	0	0	0	0	0	0	0	0	0	0	0	0	0	0	0	0	0	0	0	0	0	0	0	0	22048.5	83119	65423.5	0	0	0	0	0	0	0	0	0	0
SERINC1	4302.9	21018.5	16241	6108.25	0	17041	0	0	0	10903	0	7731.9	0	0	0	0	0	0	0	0	0	0	0	0	7237.95	4330.8	0	5902.25	0	4831.7	0	0	0	6801.8	21988	15757.5	11005.5	0	17578.5	8113.55	0	5383.05	6159.25	0	4655.4	0	0	0	0
SET	61598	302775	313595	62086.5	221625	227025	0	0	0	0	0	0	0	0	0	0	0	0	163285	92368	80202.5	0	0	0	247235	153705	56522.5	0	0	0	0	0	0	0	0	0	0	0	0	0	0	0	0	0	0	0	0	0	0
SF1	39296	40888.5	35818	33991.5	22902	25663	3435	54913	17397	4844.25	78549	11337.5	28690.5	24177.5	25195.5	18802	24325.5	22036	74903.5	15300.5	22659	60542.5	10876	9144.66	17889	30891	27602	33078.5	41113	33128.5	99593.5	28280.5	48176.5	46308.5	12489.5	22762.5	31875.5	20749.5	11760	0	0	0	0	0	0	30159	22428	25361	24564.5
SF3A1	108285	70725	73894.5	69733	73345	59961	0	0	0	0	0	0	87206	93866.5	98426	78424.5	85096	83239.5	76478	39599.5	41301.5	0	0	0	94711	112920	121920	38547.5	116825	85833	129635	77629.5	93066.5	116048	86818	57233.5	125015	55459	60026	0	0	0	0	0	0	102910	91021	100232	84712
SF3A2	51494	32252.5	39853	40813.5	27655	28031	0	0	0	0	0	0	36466	51842.5	47486	32803	37639.5	34892	0	0	0	0	0	0	37399	44629	49668.5	16425	55526.5	37977	48422.5	32314.5	42224.5	47436.5	25548	27350.5	48034.5	24578.5	23776.5	0	0	0	0	0	0	51892	38879.5	47829	41477
SF3A3	77998.5	56569	54312	0	0	0	0	0	0	0	0	0	67456	55436	54924	0	0	0	0	0	0	0	0	0	81348.5	83541	75749	0	0	0	87714	57243	70830	71822.5	53910	46593	0	0	0	0	0	0	0	0	0	60195.5	57132	57357.5	55227.5
SF3B1	65992	45773	48100	48088.5	27319	30643	0	0	0	0	0	0	61853	45185.5	52736	51442	35451.5	43002.5	45828	17562.5	19250.5	63489	18700	16276	59282	60615	57519.5	14695.5	56659	37142.5	58470.5	49403	57257	109466	36159.5	40921	116150	23606.5	34099	0	0	0	0	0	0	45567	57521.5	52952	39802
SF3B2	83779	53161	63825.5	61105	29981.5	37709.5	0	0	0	0	0	0	68821.5	57336.5	65515.5	63695	41188.5	52721.5	51049.5	26909	27536.5	76415	21850	22744.5	53738	59480	60266	14830.5	65841.5	42644.5	76384.5	52980	67319	117481	44037	51045	113510	20471.5	38767.5	0	0	0	0	0	0	59141.5	61764	59261.5	40298
SF3B3	99640.5	72484.5	76451.5	86989.5	44756.5	56258.5	0	0	0	0	0	0	111095	77775	85521.5	86551	61015	75052	109350	41415	47961.5	127435	43298	39897.5	111045	107145	103365	29977	95260.5	66327	113435	91621	106710	120440	51197.5	61359.5	150765	31196.5	46171	0	0	0	0	0	0	87276	87913.5	85898.5	71363
SF3B5	5197.05	9797.25	8714.7	3578.05	6634.7	7868	501.645	2878.65	555.185	522.06	5811.7	984.925	12078	9860.35	10647.9	6244.05	8597.4	6297.35	10855.9	4710.75	3946.3	20137.5	4491.6	4330.85	5347.85	10523	14112	1782.6	12696	7769.35	28659	11924.5	9334.75	5897.6	6121.35	6024.1	8440.15	5929.25	6964.5	1107.65	5720.45	2196.05	596.24	6693.85	2015.65	7204.35	12755.5	8746.95	6555.05
SGPL1	2983.4	15173.5	16300	287.555	16878	12776	0	0	0	615.965	0	833.22	506.465	593.175	101.151	0	0	0	9207.2	0	532.11	10556.6	0	492.555	13572	5520.3	310.815	11669	614.085	6800.8	0	817.935	610.955	999.5	11395	14077.5	2418.8	3889.3	7365.05	1673.5	0	1516.2	0	0	0	0	0	0	0
SH3BGRL2	9378.7	3646.95	4334.4	9952.6	4668.45	5547.35	5555.85	8844.4	4797.2	8497.45	13102.5	9439.4	12636.5	19181.5	14904	10056.8	38911.5	22800	0	10151	7827.75	0	7632.85	7482.6	5000.15	17586.5	28823	11726	24656	18044	3227.3	14704	7357.65	1685.11	4123.3	4671.75	3335.5	7660.15	5708.2	4474.45	16707	7323.1	5404.05	8167.6	6720.05	17641	12649.5	13580	18977.5
SLC27A2	4270.25	42644.5	24874	735.58	38544	23876	0	0	0	7121.4	0	3710.75	0	0	0	0	0	0	0	0	0	12545.5	116.38	490.86	36449	11519.5	0	16708	0	7137.9	0	0	0	4819	40652	26615	9833.3	26277	22841.5	8521.45	0	2260.85	5586.95	67.855	1395.4	0	0	0	0
SLC2A1	11230.5	71471.5	51216	13404.5	74864	62761	39735.5	16705	29525.5	66729.5	9222.6	65874	0	0	0	0	0	0	31244.5	27735.5	27926.5	39181	28105.5	21682	34261.5	20461.5	6890.4	44263.5	4195.4	24538	0	0	0	15077	101525	66430	15579	92849	60924.5	75829.5	7117	45261	48912.5	13499	39497.5	0	0	0	0
SLC3A2	2961.45	10515.5	8021.65	6616.35	13754	12521	12586.5	398.24	6225.15	10100.6	687.71	9755.65	1571.9	3802.6	2984	4023.6	4437.65	4323.5	7878.35	7537.3	6804.55	6686.35	7616.2	8007.2	11886	7378.45	4324.2	17850	3044.6	10157.5	0	0	0	1166	14210.5	14857.5	3871.15	17943	14381	17711	2651.35	13319.5	15762.5	891.465	13455.5	3489.85	2582.55	3015.9	2370
SMNDC1	3261.55	4988.9	3016.4	1419.6	4889.4	2470.9	0	0	0	0	0	0	2812.65	353.565	1347.1	2307	669.8	1721.7	0	0	0	0	0	0	1886	1263.7	0	482	283.705	2802.3	0	5956.3	4534.95	2242.9	2952.7	3006.9	0	0	0	0	0	0	0	0	0	0	0	0	0
SMU1	7282.45	7590.7	8919.35	2994.1	3435.1	6038.35	0	0	0	392.036	10534	238.49	4282.8	5337.95	4444.35	3812.25	218.34	1590.4	9110.45	121.34	2125.2	16984	207.135	2303.35	9585.25	5863.9	4161.7	1292.8	6106.3	4446.8	5301.15	1334.62	1988.8	5370.8	3712.5	6067.45	16978	538.805	2374.35	42.661	6110.35	1330.75	0	5120.05	316.856	6319.85	2486.35	3948.7	2166.55
SNRPB2	21312	21793	20570.5	0	0	0	0	0	0	0	0	0	34459.5	20842	23093.5	19586	12465	16126.5	0	0	0	0	0	0	30193.5	25326	21898.5	0	0	0	31132.5	27716.5	23211	0	0	0	0	0	0	0	0	0	0	0	0	17488.5	25522	20391	14534.5
SNRPC	11164	18859.5	16300.5	7547.45	13848	15371.5	2938.8	12234.5	6327.75	3682.25	16365	3514.45	19782.5	9825.25	13219.5	4357.5	10797	7676.4	13225	8773.35	6192.05	19024	3154.3	7229.85	26460	21751	16120	23064.5	14759.5	19570.5	3733.9	18299.5	12881	9398.1	14231	12371.5	11456	9142.15	11528.5	5752.4	8566.45	6058.95	1840.85	9807.8	6264.95	10628.4	11231.5	9592	10315.5
SNRPD1	69216	64776.5	54325	59068.5	51035	47236	0	0	0	0	0	0	85127	54840	66552	68146.5	53604.5	65669.5	0	0	0	0	0	0	38979	48719	60549.5	0	0	0	0	0	0	104305	52284	49209	0	0	0	35636	63362	40036	29713	79805	34297	45738	57270	54287.5	50098.5
SNU13	5006	4890.3	2586.7	6728.8	5243.4	2054.05	566.2	4790.1	922.575	0	0	0	13362	9274.75	11467.5	10422.5	11140.5	9221.95	14645	2543	1915.25	3313.4	1177.9	3229.95	9306.4	9203.55	13439.5	6060.4	10211	9133.8	1173.4	12193.5	13132	9140.45	7741.6	5508.25	7838	11541	5505.6	0	4161.4	1868.3	382.897	3205.3	2152.3	11064	14690.5	12281.5	7308.45
SNW1	1268.2	6688.95	4396.45	833.38	3192.2	2121.05	0	0	0	279.565	1849.5	1106.92	1881.4	1082.08	1862.83	0	0	0	1423.1	826.03	1224.6	2691	798.74	1477	985.94	646.44	1149.8	1409.3	1928.7	1596.5	0	0	0	3643.3	3430.35	2573.75	3900.8	1443.75	2121.05	0	0	0	0	0	0	1087.4	0	1973.9	0
SPATS2L	7323.35	14752.5	9598.45	4416.1	11123	9682.3	3924.05	7037.45	4023.95	2628.6	8133.9	1342.6	3222	1347.25	1969.6	3137.35	1311.1	2012	6861.1	1300.35	1505.35	0	3363.2	3071.1	6075.05	2924.4	954.845	7452.3	1229.45	3663.15	0	3748.2	2566.7	3209	9589.65	10946.2	2522.3	7274.7	7912.65	3582	0	2095.6	2636.5	0	1911.7	7200.5	3049.35	2105.35	0
SRP14	22164	51788	29551.5	16761	46650	37890.5	0	0	0	0	0	0	0	0	0	0	0	0	0	0	0	0	0	0	0	0	0	0	0	0	0	0	0	0	0	0	0	0	0	0	0	0	0	0	0	0	0	0	0
SRP54	6149.3	54708	56855	3836.65	25846.5	37950.5	5385.75	0	1598.15	3519.95	125.81	2246.65	53.414	559.82	115.883	48.978	273.04	114.075	23039	224.95	1799.05	31212	90.664	1200.51	55420.5	23493.5	1139.23	49469.5	869.4	24646	9128.1	0	2449.4	7080.25	21139	35852.5	13918.5	18816	11491	6682.45	1457	4691.15	1904.45	953.94	2708.9	139.46	7.76625	34.938	154.59
SRP68	7137	41511	38276	4239.2	36832.5	26193.5	3866.1	190.54	1749.15	3277.1	71.886	1509.15	211.45	90.541	197.77	221.161	59.846	91.959	18337.5	119.312	1650.95	21859.5	164.475	1419.75	45584.5	19071.5	469.54	31140.5	669.675	14132	0	0	0	11077.5	25847	23202.5	10101.5	13074.5	14581	4541.9	0	3615.6	1526	35.107	2286	0	367.955	87.621	0
SRP72	15367	58255.5	57262	9079.4	39373	44142	4965	1601.4	3814.4	121.608	452.29	2966.3	392.255	436.965	632.16	577.675	732.94	273.175	36567	157.6	4108.7	51052.5	138.972	2998	61026	27256	2015.2	38510.5	1855.35	20456	0	0	0	17911	29247	34957	12326.8	12206	18578.5	6809.55	7.7692	6446.15	2672.45	1553.95	2963.45	644.05	1107.65	707.075	340.165
SRP9	15037.5	36590	40784	13432.5	25955	25625	0	0	0	0	0	0	0	0	0	0	0	0	47423	8917.55	12350	44423.5	11218	14422.5	39861	24653.5	14085	0	0	0	0	0	0	0	0	0	0	0	0	0	0	0	0	0	0	0	0	0	0
SRPRA	5183.65	4302.5	6363.2	2256.05	4388.15	3001.05	435.205	473.205	342.585	0	0	0	1484.3	603.365	764.18	2258.15	159.925	983.065	7161.6	160.42	1075.13	10437	143.062	772.315	13978	5257.7	1194.45	8104.6	744.905	4289.8	0	0	0	2844.35	3648.4	3195.45	3641.5	3043.7	1624.95	659.135	998.515	768.445	700.115	760.93	560.585	0	2075.7	916.23	0
SRPRB	7357.15	7628.25	11667.1	3231.25	4962.95	10355.9	1423.29	1450.87	1176.51	875.34	1147.45	1362.75	5868	1111.64	979.295	3479.3	1338.4	2612.8	7357.15	0	361.025	8364.25	707.605	1221.55	19515	12449.5	2643.6	17982	2218.75	12135.5	596.775	3222.55	717.815	2398.07	5858.5	10943	5711.2	3907.75	3929.35	2308.45	1143.8	3885.75	1401.39	1427.1	1823.85	319.195	3510.1	926.905	0
SRRM2	9274.5	25937.5	17341	3890.1	20817	18044	0	0	0	0	0	0	0	4663.6	3310.84	0	0	0	17142.5	500.835	1992.4	28152.5	3717.2	1037.27	13073	7448.2	447.63	9900.45	1798.7	4879.7	0	0	0	0	11447.5	15353.5	5656	2465.25	7040.6	0	0	0	0	0	0	3162.7	7539.55	3525.5	0
SRSF11	9497	4771.3	3727.35	5024.85	2628.75	2001.9	0	0	0	0	0	0	0	0	0	0	0	0	0	0	0	0	0	0	0	0	0	0	0	0	0	0	0	0	2444.1	2415.55	0	1190.2	1458.2	0	0	0	0	0	0	0	0	0	0
SRSF7	4909.8	7284.45	3833.3	2166.7	5873.35	1984.2	0	0	0	0	0	0	5327.95	4251.05	3842.5	8088.5	3270.95	5597.35	0	0	0	8923.85	2010.25	802.66	6803.9	7009.4	5933.85	10168.4	8451.5	6730.4	11858.5	8574.8	9530.75	3572.3	11148.5	4916.45	4557.55	9312.15	8056.25	0	0	0	0	0	0	7976.5	7288.5	6028.65	5452.5
SSR4	8684.1	6103.25	15030.5	3135.45	7146.45	9185.6	6263.55	0	2794	943.795	7006.95	1895.4	2927.3	2647.85	1485.65	3521.55	4031.15	2765.65	13661.5	2077	5061.65	13723.5	621.48	3226.85	19641	10103.9	6522.85	21492.5	3748.25	15396	3573.5	5950.85	3594.95	3053.8	2555.53	13370	7311.05	2930	4892.7	2742.35	6152.35	4567.3	1191.15	4357.75	3084.15	3238.25	6020	4399.45	3022.8
STARD10	2805.8	1547	2764.65	2305.75	976.215	1777.38	2775.5	2208.35	951.71	892.735	2467.1	1482.85	0	0	0	0	0	0	0	21255.5	10983.5	0	30990.5	52703.5	759.33	2638.25	0	625.72	2663.8	0	0	0	0	990.72	1950.3	1196.2	1116.7	1794.2	1417.37	3630.85	2504.8	2209.05	17438.5	0	10926.5	2038.35	0	770.155	0
STEEP1	8839.8	6948.9	15266	5787	2207.91	5957.8	3112.6	4521.3	2120.75	0	0	0	6729.35	5256.2	4905.9	6074	4325.6	4787.95	14225.5	3037.65	4015.25	16981	2385.85	4406.4	5891.2	4914	3634.85	2702.1	6174.2	5488.7	12784	6644.45	6343.6	12208.3	4773.15	7324.4	13764.5	403.19	5836.9	5028.7	7646.9	5359.2	2481.35	7350.8	5128.75	4344.35	4461.6	4626.15	3858.85
STT3A	535.39	4118.1	4368	423.16	3905.25	3690.05	0	0	0	0	0	0	0	0	0	0	0	0	1073.5	172.4	690.55	3127.2	0	243.178	12954.5	2907	191.99	18751.5	198.25	8429.8	0	0	0	346.28	4586.55	4531.2	367.8	3332.45	4479.45	1495.15	0	1393.4	0	0	0	0	0	0	0
STXBP2	4678.35	3945.5	1902.7	4694.4	858.875	2782.25	0	0	0	0	0	0	2861.45	1908.1	2326.25	5019.65	984.49	2640.25	0	0	0	6766.8	4991.6	2039.65	0	0	0	1716.65	1218.25	882.925	0	0	0	5715.2	1172.3	2271.6	3987	9036	5896.25	0	0	0	0	0	0	1062.1	1853.75	1698.1	1659.55
SUB1	56836	32151	30052	54800.5	41245	22833	31758	36140.5	26858.5	20763	71003.5	19451	62159	45224	53692	53817	41347	53157	90448.5	59658.5	64034.5	91384.5	53818.5	37350	95267.5	77771	45117	19386	47808.5	28454.5	35275	28721	50197	122640	67419	38773.5	149660	38342.5	45543.5	16118	51454	19598	16733.5	55706.5	30319.5	46165	15872	28293.5	43612
SUGP1	3202.85	7180.5	3746.65	1816.55	5707.9	2696.55	0	0	0	0	0	0	2685.2	2767.55	4043.05	3192.75	2655.8	3172.55	5390.75	661.57	2789.9	5554.1	1340.38	787.475	5573.95	5283.7	4190.65	3646.8	4784.25	5138	4851.6	3216.45	4716.3	0	3427.15	2448.05	2068.26	4795.05	1721.3	0	0	0	0	0	0	2495.8	2743.55	1883.7	2951.85
SUMF2	5028.8	3041.45	4584.5	0	2954.92	5178.45	0	0	0	0	0	0	0	0	0	0	0	0	0	3187.35	1922.35	0	4707.3	1359.05	0	0	0	2114.65	0	1257.95	0	0	0	0	0	0	0	1207.3	1436.85	0	0	0	0	0	0	0	0	0	0
SUMO1	2971.2	15052.5	7613.65	4623.85	11714.5	9463.8	4241.45	0	2363.95	1079.28	838.95	2356.9	1600	2509.8	3170.6	2464.45	2416.8	2351.5	6879.85	3333.3	2900.2	21596	6028.25	3585.85	32609	20482	3403.2	5554.7	3657.5	5648	0	0	0	0	9945	8534.1	5776.4	6339.6	7226.3	1415.8	801.2	3333.15	3868	1724.6	3217.1	3259	2676.15	3363.9	2464.1
SUMO2	4091.7	12826.5	5420.75	0	2631.05	3398.9	4904.15	0	7594.55	0	0	0	0	0	0	0	0	0	0	7236.3	10804.2	11745	13476.5	15436	0	0	0	13180	0	5947.65	0	9645.45	4006.75	4575.4	2842.8	4152.55	9516.8	854.265	6186.75	0	0	0	2504.4	3799.7	4523.3	0	0	0	0
SUPT5H	1651.2	634.96	940.18	2621.8	1226.11	623.18	0	0	0	1297.9	815.78	528.81	2069.25	950.81	1972.17	2752.4	0	1160.15	0	0	0	0	3504.7	1596	1862.1	1065.38	890.88	503.515	1189.25	909.835	0	0	0	1642.3	1824.5	603.2	921.44	2626.45	1165.2	650.31	1446.95	1772.6	0	0	0	1394.85	3046.8	1574.4	1577.95
SURF4	3677.9	6285.7	9079.45	5373.05	4892	9738.75	5577.2	840.44	2117.65	0	0	0	0	0	0	532.48	704.43	655.245	12050.5	2907.25	1953.45	19127	2631.75	3170.75	22049.5	8480.95	336.18	12864.5	0	11948	0	0	0	5991.7	3656.6	10641.2	4288.1	0	4536.8	8784.7	0	5076.5	4623.25	1243.9	7054.05	140.4	661.585	762.02	0
SVIL	111.12	20.131	30.0955	93.367	25.4356	44.3595	19371.5	110.28	10254.5	13406.5	60.353	28553.5	184.031	225.36	196.5	245.7	1274.13	203.48	0	31672.5	20021	0	26623.5	22844.5	0	126.182	644.29	18.934	613.195	315.605	0	0	0	0	46.1755	20.8328	67.345	129.685	977.21	30830	31.6995	20836	23005.5	128.95	15868.5	262.08	96.0435	152.92	140.675
TAF15	8773.45	23727	20894.5	10332.5	12795	14185	6114.25	8986.1	5228.3	8116.7	13140	9684.05	0	0	0	0	0	0	23418.5	5245.1	8086.9	28036	5878.15	7820.7	8429.1	7945.6	8216.1	15558.5	16413	16796.5	0	0	0	7214.9	11622.5	12033	8799.9	7352.6	8726.2	6596.6	8204.45	6533.75	5472.25	7712.4	5962.8	8963.15	6337.25	8537.45	7017.35
TAF4	7074.5	0	3775.9	4960.8	0	1814.75	5361.8	8500.5	7302.4	0	8565.8	1746.55	10544.4	9483.55	6568.9	12655	8821.8	11700.5	7473.2	3319.15	2655.25	0	3674.55	2808.35	2693.2	5851.8	11371.1	13110.5	6343.5	10465	5885.3	13401	13255	4866.5	4323.1	5874.45	9330.95	0	1715.3	6878.8	9617.1	7051.7	3368.55	2874.4	3125.35	5508.5	15926	12148	8041.4
TARDBP	1528.1	1618.6	1367	1464.15	3670.5	1352.8	55.787	1127.8	724.445	997.39	0	450.225	1001.83	2054.3	2204.35	1847.5	1959.15	1418.6	0	0	0	0	705.675	972.1	923.79	1422.7	2289.5	4066.9	2044.45	2957.1	0	4143.4	2359.7	0	3508.95	1593.05	845.11	5415.05	3059.95	0	0	0	0	0	0	2974.6	2948.85	3631.8	1809.85
TBRG4	2888.7	8958.6	5190.8	1560.45	12079.5	6304.2	1108.5	6168.95	3949.15	5804.5	6355.8	6855.15	21940	2917.7	6736.1	30268.5	141.8	14087.5	0	0	0	0	1570.68	948.595	2793.85	708.18	532.055	11985.5	2275.15	6737.75	4519.9	661.65	2874.61	0	14280.5	10752	1362.18	18071.5	16155.5	5763.2	0	1810.95	3864.95	3016.2	2031.65	0	37575	16844	6548.5
TCEA1	4255.9	17483	14403	4354.7	14024.5	12830.5	3722.95	1017.67	1916.45	12719.5	884.295	7961.8	1491.96	3798.9	2715.45	1826.15	2387.25	1747.75	3680.9	3010.4	2614.35	6774.1	5358.2	4120.1	5990.55	3814.3	2876.55	7886.25	5015.8	6369.75	0	0	0	3844	15035.5	11080.5	7194.25	19186.5	12720.5	5927.7	1927.45	3778.3	4539	1009.17	2861.4	2300	2387.5	3504.05	1380.84
TCERG1	6203.9	9338.9	10729.2	8890.15	1634.37	3751.8	0	0	0	0	7754	1146	2807.45	4641.8	2891.95	1881.2	1452.83	1640.55	5608.4	2619.1	1242.37	5936.4	1945.95	1630.15	12723	6036.45	5616.15	1641.25	6842.85	4659.6	0	4978.8	1516.75	29256	4475.85	7426.85	41502.5	1829.25	5122.95	394.445	5730.95	1382.8	367.13	3160.15	855.755	3661.55	666.265	3301.8	462.57
TCOF1	5787.05	28411	24640.5	5650.45	27472	21168.5	0	0	0	0	0	0	0	0	0	0	0	0	0	0	0	0	0	0	0	0	0	0	0	0	0	0	0	0	0	0	0	0	0	0	0	0	0	0	0	0	0	0	0
TCP1	76875.5	48976	53393	0	0	0	37560.5	53184.5	36197.5	0	0	0	53842.5	61814.5	55255	0	0	0	0	0	0	0	0	0	0	0	0	0	0	0	0	0	0	0	0	0	0	0	0	44126.5	92126.5	49036	35823	71146	44894.5	55206	58124	52433.5	64487.5
TECR	677.625	25683.5	20312.5	282.19	23853.5	20871.5	2283.8	0	642.705	1135.2	0	2078.85	0	0	0	0	0	0	1900.64	274.33	562.615	3364.1	455.455	1228.66	19323.5	7571.75	61.521	21360	201.97	8982.5	0	0	0	226.6	30152	27929.5	832.81	17397	19905	8779.3	0	3739	3105.2	0	2479.85	0	0	0	0
TGFBRAP1	3480.7	5349.9	3623.4	1864.25	6639.35	3557.7	0	0	0	0	0	0	2228.9	4104.35	3399.85	3193.05	1314.4	1939.4	0	0	0	0	0	0	1012.99	1615.3	1675.85	1240.7	4283.1	2719	0	1516.5	1707.1	0	0	0	0	0	0	0	0	0	0	0	0	2256.75	1856.3	2333.1	2158.3
TIMM13	489.97	2516.6	1826.55	0	3775.25	3666.8	0	1915.55	695.215	520.175	2529.7	1206	0	1094.86	568.175	0	3154.7	899.195	0	3095.5	1425.85	0	4537.6	3164.65	656.66	1802.4	3285.8	2132.4	1744.75	1798.15	0	0	0	0	2402.45	2355.2	0	483.01	2770.85	1838.9	0	842.285	3183.45	0	1619.9	512.57	1413.2	581.105	0
TJP1	4945.05	3058.5	1742.45	1629.5	1258.46	575.745	956.67	2370.55	1736.5	8664.3	2026.9	6833.75	7634.05	11528.9	6342.5	5506.55	2594.95	4183.1	0	1288	1142.4	0	1358.45	518.595	850.445	2384.15	4537.55	19835.5	12224	17717	0	2304.8	2092.8	0	1347.4	3059.6	2217.5	4854.95	1768.65	552.735	1402.6	4955.75	1990.7	2591.8	1445.95	7004.4	7040	5839.75	5922.6
TK1	1216	4214.75	3344.7	900.17	4134.75	4164.85	0	0	0	3969.7	0	3196.75	1644.8	1470.4	891.7	1022.54	2099.05	1539.25	0	1036.54	943.565	0	438.785	671.57	1039.4	1524.7	2230.75	1318.3	840.89	1424	0	0	0	0	3893.5	3543.6	1864.3	1558.7	3238	1299.19	0	1207.05	1453.75	0	1042.71	1192.8	1002.5	1086.2	985.495
TM9SF4	699.34	1055.72	347.075	0	1224.8	408.13	0	0	0	0	0	0	0	0	0	0	0	0	0	0	0	0	0	0	3029.75	74.348	0	0	0	0	0	0	0	0	1744	2576	47.562	488.21	974.5	0	0	0	0	0	0	0	0	0	0
TMEM109	8983.6	8693.55	7312.5	9962.4	10641	6144.85	0	0	0	0	0	0	862.51	757.175	1249.09	2408.8	669.79	1653.85	35599	0	6144.2	32962	2691.5	910.445	25611.5	18827	4708.2	18424.5	675	11988	0	0	0	30001	12113.5	6355.6	24829.5	3291.91	5449.5	0	0	0	1771.85	1397.6	358.3	458.83	2351.05	688.93	512.52
TMEM214	2299.3	2514.9	2910.55	1203.6	3743.6	3020.85	0	0	0	0	0	0	0	2182.65	918.305	1567	1274.55	933.82	2565.15	725.535	748.66	4146.05	1919	1171	4638.95	3176.5	1948.35	13520.2	1766.75	8617.85	0	5047.5	1913.7	1759.85	1118.75	3052.15	5339.4	3458.15	2220.85	865.76	1215.3	1139	0	0	0	739.98	1129.74	814.1	0
TMEM33	641.43	23107	18407.5	3294.55	11055	18287	2469.4	0	1211	0	0	0	0	0	0	0	0	0	11410.9	665.875	1116.66	10695	0	1071.74	28441	12098.5	1232.9	40745	213.45	20152.5	0	0	0	0	17267	20866.5	3860.2	4197.2	7442.5	1268.43	0	5129.4	2717.95	0	2316.15	0	0	0	0
TMEM97	6690.8	22056.5	16405	4375.3	22450.5	16833	0	0	0	6591	0	7268.65	0	0	0	3063.5	613.54	2663.15	0	0	0	0	0	0	15490.5	6887.55	580.51	6353.5	0	2627.1	0	7218.8	10811.7	10283	22253.5	15604.5	8098.05	18424.5	15178	3593.25	749.8	1707.5	0	0	0	0	0	0	0
TNFAIP8L1	1167.4	7512.2	4511.65	0	3670.15	4253.1	0	0	0	0	0	0	0	0	0	0	0	0	0	0	0	0	0	0	0	0	0	0	0	0	0	0	0	0	6479.6	6030.05	2135.3	2997.6	2946.25	0	0	0	0	0	0	0	0	0	0
TNPO1	432.04	10847.2	12201.5	2416.6	10780.8	14500.5	6691.25	0	3724.65	1467	0	1168.76	0	0	0	78.139	1083.97	293.495	12371	3402.05	3660.15	12310.5	4184.6	7042.8	11322.5	4375.8	814.525	11204	427.22	4099	0	0	0	578.355	8621.05	9517.65	2612.5	6940.45	7069	5417.9	0	4671.85	7887.55	0	7235	391.36	96.736	166.23	196.115
TOMM70	885.23	879.76	1174.28	0	1057.1	1785.1	0	0	0	2723.9	0	1059	0	0	0	0	0	0	940.59	2793.3	713.825	0	0	0	2491.15	1930.55	0	37002.5	1759.03	15198.5	0	0	0	0	8357.4	5607.05	0	24302.5	24302.5	0	0	0	0	0	0	0	0	0	0
TOP1	216.29	4461.95	5575.4	0	0	0	0	0	0	0	0	0	0	0	0	0	0	0	0	0	0	0	0	0	3400.6	2029.4	1176.1	0	0	0	0	0	0	0	3604.4	2112.7	1573.8	2001.5	3178.55	0	0	0	0	0	0	0	0	0	0
TPP1	7417.9	12483	10983.5	5734.05	14233.5	8261.25	4941.65	7297.45	3718.35	14899	6613.5	3954.65	4578.7	3867.6	2884	1985.65	3702.75	3211.8	2353.5	4888.25	4233.55	0	4678.45	5137.7	5810	5828.15	3627.05	6292.95	2082.85	4643.5	0	0	0	0	10694.5	9525.55	2381.7	19753	13377.5	4278.15	4610.9	2638.3	3815.15	0	3747.5	0	0	0	0
TRIM25	274.13	2604.25	1908.85	0	4014.35	2220.05	0	0	0	4721.25	0	2351.85	952.01	242.66	729.61	0	0	0	0	868.825	544.01	0	2279.2	938.765	0	0	0	966.875	0	496.535	0	0	0	0	4892.15	1198.97	0	2704.2	1355.54	4124	0	1399.1	0	0	0	0	0	0	0
TRMT10C	753.87	6708.5	2965.75	387.29	5826.55	5360.95	0	0	0	1782.1	0	1143.1	853.48	327.555	447.605	2108.3	90.614	363.188	0	0	0	0	478.48	168.55	1787.35	314.32	191.46	1070.38	231.68	627.815	0	0	0	243.52	3848.3	3197.05	550.61	5624.85	5238.95	762.27	0	478.945	767.79	0	312.335	245.325	4441.5	1528.05	0
TSR1	1940.4	4527.65	6136.7	890.69	5524.6	1987.45	496	970.96	561.99	1584.8	886.62	459.79	11550.5	2447.05	6983.5	12527.5	1791.26	6697.65	2733.5	1083.45	1031.46	4254.95	750.78	1275.47	14621	10051.7	4624.25	7624.55	3985.15	7054.8	840.21	10992.2	5235.55	3089.55	4575.95	1981.25	7317.35	1977.45	4212.7	1713.76	678.21	1145	981.55	893.625	2718.5	626.615	12565	5808.5	825.74
TUBA4A	1301.4	2945.7	5703.15	0	0	0	0	0	0	0	0	0	0	0	0	0	0	0	0	4945.95	5131.75	0	15040	14707	0	0	0	2438.1	579.41	1634.4	0	0	0	0	0	0	0	0	0	2172.45	0	1536.75	5333.15	0	2519.7	0	0	0	0
TUBB	127320	260790	186025	128690	271810	259150	122415	56466.5	79151	0	0	0	0	0	0	0	0	0	176930	90231.5	123765	162665	136895	132875	0	0	0	220400	71006	152465	0	0	0	143375	328775	302765	112966	216320	233110	132850	89288	94951.5	138785	60232	115890	0	0	0	0
TUBB2B	2435.85	1530.15	3185.2	4913.5	0	1619.4	0	0	0	0	0	0	2757.2	3338.55	3876.6	3469.1	2434.05	3274.45	0	0	0	0	0	0	15629.5	11273	4081.7	16634	5611.7	10358	0	0	0	0	0	0	0	0	0	0	0	0	0	0	0	3558.9	4065.35	3363.65	3443.5
TUBB4B	162810	265780	237780	175240	313085	257610	202750	82687	145880	0	0	0	0	0	0	0	0	0	229090	160600	185830	233870	206240	220905	277625	185460	111615	326445	124560	228055	0	0	0	147260	312770	286865	155980	274800	250925	205685	127950	165425	230295	97007.5	209330	0	0	0	0
TUFM	16921.5	67527	55296.5	23203	46052.5	52774.5	0	0	0	0	0	0	0	0	0	0	0	0	0	0	0	24514.5	22858.5	23073.5	0	0	0	0	0	0	0	0	0	7954.7	41646.5	42114.5	14341	49234.5	36752	27231	15148	21657	0	0	0	0	0	0	0
U2AF1	5136.15	11064	10081.2	3327.2	6848.5	5796.5	2440.5	1186.4	778.7	2705.1	2876.7	2700.3	5082.8	4238.4	3816.75	4453.35	403.275	2296.55	7387.15	2475.55	4021.1	6939.95	3160.4	3263.45	9932.25	5715.75	3443.05	5080.9	4472.95	4961.3	2406.4	5873.65	3967.85	6384.3	9364.6	7606.9	19254.5	6311.7	8012.9	3002.55	7509.1	4787.05	2578.75	5675.15	3005.1	2526	5067.85	3257.85	2106.9
U2AF2	18996.5	31956	16884.5	16454	11740.5	12075.5	1491.95	4478.65	907.34	638.94	19659.5	2937.15	5960.8	12950	8715.15	5620.35	4595.25	3844.75	40980.5	6949.1	10519	63336.5	12417.5	11795	63405.5	29347	15214.5	10360.9	15603.5	14428	15048	6337.8	4085.1	44552	18279.5	19437	106612	3657.13	18966	4801.9	24247.5	7183.8	1746.9	27167.5	7354.15	10809	4803.6	5123.95	8190.4
UBA2	16005	3502.45	21771.5	368.55	5363.9	2374.55	0	0	0	3197.9	17017	2708.3	20812	9594	7439.45	11103.8	11576.8	20856	11448	13708	11919	15021	16632.5	25424	16987.5	19472	22701	0	0	0	0	31806	12636.5	13108	1426.61	3305.15	16874	1598.25	2456.4	14765	0	4797.25	26928.5	17364.5	15047.5	19331	17104.5	16432	17078
UBAP2L	1006.7	1612.3	2219.15	572.25	2825.45	1388.45	404.605	1078.7	668.04	0	0	0	1442.9	1951.9	1619.25	2041.7	3125.95	2061.05	765.23	1464.15	1293.8	0	334.775	1463	3299.25	2304.5	1724.65	5564.15	2778.55	4331.3	0	2918.3	1945.26	0	2185	1068.63	0	2545.6	1993.55	0	0	0	0	0	0	967.845	2528.1	1266.45	0
UBE2I	5777.2	16064	6139.65	7539.5	4877.4	4344.24	3667.75	3435.2	2837.15	1665.15	1914.95	1709.45	0	5485.2	4314.4	639.755	21416	10020.5	3622.7	3275.45	2921.4	12751	4987.4	5792.3	46669.5	30937	13777.5	17421	6162.55	15146	0	2090.05	2853.3	3846.6	21922	7159.5	5113.6	2898.49	1471.45	2189.65	4002.3	2498.5	3242.45	2905.5	2243.9	4965.15	1839.5	2162.8	3148.7
UBLCP1	27520	29330	14000.5	42325.5	36940	33081	47656.5	19679.5	19116.5	86112	19212.5	40204.5	10704.5	50751.5	24602.5	0	0	0	0	126070	68231	0	112704	57541.5	0	0	0	3496.65	27431	17230.5	0	0	0	38942	56499	61667.5	44214	69453	32296	119778	43561.5	45804.5	66732.5	36599.5	41711	51531	10414.2	28105	68372
UBTF	7322.4	16525.5	5001.55	7417.25	5564.05	7331.8	3939.85	4152	3573.05	4902.35	7557.25	4769.8	2903	2935.6	2432.15	2137.5	8247.45	6149.75	0	4383.9	4098.45	0	5138.25	4352.4	1977.3	4469.7	7514	2852.95	7058.75	5311.3	0	0	0	0	3474.55	5602.1	6755	4379.47	3729.4	0	0	0	5981.9	6203.1	5540.3	5147.75	3216.65	3472.65	6213.1
UFD1	3193.35	1613.3	2904.3	7261.75	2982.3	1509.25	1885.3	6338	610.51	0	4857.15	1380.37	5397.3	5556.1	2855.3	439.04	6456.2	8353.75	0	0	0	487.23	2703	1990.4	3234.5	3312.1	8395.45	27600	5807.55	18087.5	0	4304.8	4901.65	0	0	0	0	0	0	1191.2	2976.8	1786.8	1397.39	0	2290.2	2692.25	1421.2	1072.9	8599.1
UFL1	26847	17785	20230	20523	22251	18746.5	0	19718	8495.65	0	0	0	0	0	0	0	0	0	11616.1	0	4609.75	0	0	0	0	0	0	20676	3353.6	9406.3	27584	31294	40312	12137	21472	16711.5	4573.7	30490.5	19057	0	0	0	0	0	0	0	0	0	0
UPF1	852.61	5142.75	3398.35	2159.8	7905.75	5817.2	4050.05	0	1100.6	8049.9	719.35	6848.8	902.035	2979.2	3579.8	2396.5	1443.3	2208.05	0	2932.3	1403.95	1759.8	7242.25	4411.15	1405.6	1479.7	1716.1	1629.15	2859.25	2671.85	0	0	0	0	7913	4637.6	2046.65	7597.65	7773.1	6616.05	791.425	4007.55	7486.25	546.86	4348.5	2382.8	1546.15	1919.1	432.375
USO1	1459.4	4817.7	2952	1694.6	4975.5	4171.9	1979.35	0	2039.4	2839.05	532.62	680.085	1510.1	2706.3	2201.5	1749	2899.85	2303.6	0	3049.5	1835.9	0	12099	5214.4	743.41	1313	2220.95	757.105	1803.75	1538.9	0	0	0	0	7141.35	4861.25	1181.9	7150.55	5810.6	1767.4	1351.8	2812	3164.65	928.86	2377.35	2254.8	2045.25	3477.8	2260
USP22	550.06	12158.5	4071.15	527.915	10727.5	7142.95	0	0	0	605.155	0	266.89	0	0	0	0	0	0	1023.29	117.883	111.95	0	0	0	2531.3	855.55	0	3575.75	299.43	1424.55	0	0	0	625.955	10919	7333.5	1626.3	7819.6	4717.3	937.1	0	294.385	0	0	0	0	0	0	0
USP7	902.215	4265.05	5371	2664.05	6226.95	4906.3	4338.95	0	2890.8	926.225	0	1440.55	0	0	0	323.655	572.56	1623.75	0	2787.3	2458.9	0	3995.8	4803.1	6914.35	3961.95	2084.2	2845.9	986.015	2795.8	0	0	0	0	6605.75	4396.3	4420.05	3665.55	4520.05	2165	0	3812.35	2224.1	0	3033.75	1598.4	1722.3	1284.75	0
VIL1	72492	94135.5	96719.5	90658.5	77826.5	77882.5	90875	86647.5	84487.5	124100	95811.5	169590	83247.5	181815	157775	78331	550410	310780	55178.5	271300	255310	45289.5	188480	165095	35169	274880	432000	34043	313955	191860	81711	83680.5	90286	62653.5	138210	127575	60894	61754.5	76762	142815	137795	131150	119020	95865.5	115825	331420	76342	200245	309380
VPS11	19889	13768	15792	12586.5	7621.05	27346.5	6785.3	33242.5	6782.05	3520.8	20137.5	4790.1	26073	24695.5	32490	19624.5	4365.6	8543.8	5632.8	42975	5665.15	11973	2868.53	2486.7	8499.65	10993.9	7339.05	4941.85	46219	16652	8304.7	9247.4	8305	12741	4495.25	4190.7	17519	5168.95	5643.45	3217.1	17343.5	538.82	0	20402.2	17379.3	30643.5	18035	12561.7	38230
VPS16	5776.2	6250.8	5473.55	3572.6	10574	5191.05	1352.35	1514.8	1845.15	2410.6	2560.4	881.165	4378.85	4241.65	5082.35	4283.6	2571.45	4473.05	4758.9	892.205	1396.6	4740.95	473.51	1215.1	4920.85	7067.15	4098.55	3697.95	5266.2	3646	0	2328.65	2450.4	1686.7	1629.7	2061.7	3164.35	1350.75	1692.2	0	0	0	655.425	1398.94	0	2514.4	5073	3348.2	2070.2
VPS18	3267.85	2415.95	4975.4	0	3621.4	6109.25	0	0	0	1215.75	0	1260.79	3502.25	2911.35	3935.9	2393.35	0	1707.95	0	0	0	0	0	0	4763.45	3958.4	2346.2	4110.15	3926.75	4085.35	0	0	0	0	734.285	950.235	0	0	0	0	0	0	0	0	0	1292.93	3127.65	1787.2	474.03
VPS33A	6782.55	3525.4	4516	4445.35	4287.7	5296.1	3230.25	1589.3	1669.7	1331.25	1693.65	1047.62	3244.1	6827.4	4991.35	3765	3494.2	2582.15	2492.6	738.195	1270.5	2161.45	1197.8	866.785	5509.8	5032.25	5709.05	5249.3	8076.7	5365.9	859.91	1587.35	752.83	1528.9	1838.3	2096.55	2767.1	1080	1540.65	1053.86	1638.2	1277.76	650.645	0	1143.2	4262.85	3264.35	3258.55	3318.1
WASHC5	1215.7	411.64	2097.45	0	0	0	0	0	0	0	0	0	2129.65	2659.4	2758	2204.2	1913.1	2302.75	0	0	0	0	1654.75	792.025	812.81	2257.25	3229.55	909.815	2977.8	2627.25	0	0	0	0	0	0	1511.5	817.98	668.29	818.97	851.42	1390.5	0	0	0	2007.95	3226.6	2886	1698.1
WBP11	1952.45	7041.25	3677.95	848	9195.05	4688.6	1434.6	834.67	537.92	1362.7	1423.1	1254.15	8279.15	2025.6	3193.35	8277.6	1669.45	3786.65	947.79	2986	988.1	0	1448.13	1040.65	0	0	0	1329.15	5637.45	2664.45	0	6326.75	3315.1	0	8419.1	3406.35	5125.2	9758.4	4052.85	1117.84	1200	439.93	1924.7	1930.95	2023.3	504.76	14457.5	4851.55	816.72
WDR1	1793.45	360.875	337.33	8303.05	2399.4	5507.75	22262	1591.7	9914.75	29448	0	21328	92.979	11408	5650.05	2357.45	8155.95	4754.75	0	26042	23884.5	0	33685.5	29081.5	492.665	2937.55	7116	472.115	8053.9	4651.4	4987	240.845	1919.1	2196.2	2741.15	4264.35	1657.4	9149.6	6415.5	27856	6771.35	20093	36320.5	2722.6	28328.5	7437.45	75.009	1074.96	5138.85
WDR26	2283.85	3334.65	1145.65	1660.1	4070.2	2621.45	0	0	0	949.6	746.93	529.16	4187.9	3341.2	2693.65	2302.45	3863	2506.8	4103.9	1398.5	1014.5	0	3527.9	1287	592.165	2044.8	3662.45	156	7007.9	1829.15	0	3236.25	3209.7	0	4952.55	2651.9	2084.9	5307.65	4636.35	0	0	0	0	0	0	1730	4039.1	4715.6	2368.9
WDR48	5080.7	9758.5	5994	6010.9	7140.05	6843	5587.25	0	3335.05	8406.25	0	6765.7	6216.9	4167.85	0	0	0	0	0	0	0	0	0	0	0	0	0	0	0	0	0	0	0	0	8351.4	7986.7	11391	6040.25	6900.6	6495.05	0	7819.5	8017.55	0	6286.45	0	0	0	0
WDR5	4578.1	2581.05	3697.2	4695.15	2066.2	2614.75	511.26	1731.75	369.15	3170.5	1546.25	406.325	1447.41	2060.7	1104.35	626.59	4424.15	1774.35	248.65	864.325	882.34	0	561.92	929.625	2276.3	5916.25	7498.45	41234.5	4440.85	23856.5	0	0	0	5441.4	3487.8	2980.15	5268.8	4582.5	1109.45	428.48	2851.6	718.025	189.36	1797	474.955	2815.1	2563.7	2718.9	3193.55
WDR61	21573	23358.5	23306.5	18165	22385	25801.5	0	0	0	0	0	0	0	0	0	0	0	0	0	0	0	0	0	0	18190.5	20144.5	21038	13604	20032.5	18655	0	0	0	0	0	0	0	0	0	0	0	0	0	0	0	0	0	0	0
WDR82	11988.5	24490	17205	9686.3	12407	12439.5	2054.3	6928.9	2412.4	2811.45	12408	3808.5	6215.1	9891.2	8898.65	4748.35	8963.7	7047.45	15536	6816.6	5460.05	35257.5	7849.35	5007.8	15666	13233.5	11067	12671.5	16349.5	16847.5	12700.5	5913.6	3954.9	15155	15009.5	13602.5	22079	6665.45	11142	3993.15	14288	5953.1	1866.9	8330.25	2172.9	12530	5350.8	9710.4	9083.65
XIAP	1719.7	4493.95	3468.4	1754.7	5149.9	2373.85	0	0	0	662.14	1762.7	1477.95	4653.15	9261.5	6119.25	2988.4	7196.35	5226.3	0	7370.15	3589.6	0	4617	5088.9	2528.4	5427.9	7153.75	1258.45	8207.25	4880.1	0	0	0	0	5793.05	1923.75	2488	5195	4600.45	0	0	0	534.16	2055.2	1096.45	4507	2898	4346.6	4829.2
XPNPEP1	412.2	5016.4	3589.2	1038.3	8711.1	6571.65	1528	1765.8	507.7	1904.85	0	967.59	0	0	0	0	0	0	0	0	0	0	9688.55	4850.6	4791.8	1576.45	0	3263.35	0	1148.15	0	0	0	0	3879.35	4741.15	1824	3883.85	2778.45	2687.5	6070.1	1289.15	5360.65	0	883.185	0	0	0	0
XPNPEP3	3162.15	1723.85	2572.05	4281.4	1477.85	3118	2296.95	1928.7	1790.4	0	0	0	2114.2	6265.75	4839.05	3105.2	4352.25	3763.45	0	3482.15	2007.85	0	4504.9	3954.25	2418.25	4460.3	6136.85	669.745	6820.15	3855	0	0	0	0	0	0	5141.2	0	2941.95	5233.55	0	2547.3	2585.05	0	2798.1	4717.75	1311.56	3233.15	3687.4
YARS1	399.11	11809.5	7136.75	1905.2	13769	11636.5	2633.65	0	1239.34	3876.65	0	1680.85	0	0	0	360.13	385.8	98.141	0	2030.9	1613.2	0	7933.65	5836.25	2604.3	1338.7	0	1607.1	75.748	1440.2	0	0	0	0	10880	5722.75	0	8665.25	8724	2459.65	0	2579.2	7425.35	0	2911.7	0	0	0	0
YARS2	4761.55	2585.95	2574.55	1996.2	2303.5	1074.35	0	0	0	7913.8	4799.4	5163.7	5664.25	2410.25	3357.8	6728.6	0	2631.05	6269.5	3872.25	4198.8	7011.2	591.025	1635.5	5376.8	4327.25	1186.65	9876.75	3816.35	5307.8	5395.2	6525.55	7588.6	0	4705.55	2925.7	9960.55	16342.5	5714.6	0	0	0	1094.7	2157.6	3222	1624.7	5651.6	3739.85	0
YWHAG	14844	34917	32442.5	18804	43454.5	33574	34559.5	14905	28851	42785	17377	31812	0	0	0	0	0	0	31305.5	20129	19838.5	30129	30762.5	26652	0	0	0	0	0	0	0	0	0	9347.7	36201	29901.5	9825.4	44599.5	30384	25698	14152	23971	35230	13475.5	29906	0	0	0	0
ZC3H15	3608.05	5875.8	2646	1344.9	3690.6	1394.73	4194.65	1102.9	2256.9	1499.7	0	2293.25	2418.8	1916.15	2672.4	4189.6	2315.95	2494.5	6210.05	2288.3	2660.55	6776.05	1765.45	3351.35	4127.3	1340.4	2792	5335.2	2693.45	4388.7	0	5397.95	4557.9	4034.6	6089.4	2435.05	4977.8	6552.8	4669.05	0	0	0	0	0	0	1557.3	3415.8	2208.85	2924.1
ZNF207	13343.5	17664.5	14635	9783.4	8311.4	10021.9	1033.64	14114	4551.55	0	19985.5	2680.75	13884.5	9860.4	11531	10543	8059.85	9789.4	9214.2	3609.1	4035.85	22480	5815.7	5481.8	21000	15789	10787.5	14329.5	12326.5	14236.5	14671.5	13858.5	17123.5	8569.65	9128.3	10844.9	9431.9	1580.55	10260	1680.39	13043.5	5966.2	1167.87	17833.5	3375.4	11012.5	10992.5	11938	8273.8
ZW10	839.7	4052.7	3319.1	754.18	5027.7	3847.2	3524.45	1327.55	2891.7	2874.55	1040.9	2086.2	782.12	2431.25	2804.45	2247.25	1722.45	1943.8	0	1493	1667.7	0	3319.3	1791.05	1884.95	2448.55	1613.15	3201.6	1541.25	3273.2	0	0	0	1045	6039.05	4131.85	1052.5	4989.2	5628.05	5273.1	0	3134.2	3018.65	1230.09	3334.45	1408.34	1250.53	1650.92	1624.7
AAMP	0	3679.85	2434.5	0	4088.5	2573.15	3144	0	2782.55	5290	0	3657.75	0	0	0	1486.15	0	780.625	0	2099.4	2033.4	0	6787.55	3816.05	0	0	0	0	0	0	0	0	0	0	4261	2645.25	0	5422.2	2967.65	3722.4	0	2600.55	5459.9	0	3319.05	0	0	0	0
ABCC11	0	2808.6	1917.55	0	4052.55	3853.7	0	0	0	0	0	0	0	0	0	0	0	0	0	0	0	0	0	0	0	0	0	0	0	0	0	0	0	0	2244	2960.65	0	906.99	2107.1	0	0	0	0	0	0	0	0	0	0
ABCD3	0	73.4235	82.2075	0	509.218	138.03	0	0	0	0	0	0	0	0	0	0	0	0	0	0	0	0	0	0	0	0	0	6485.1	235.81	1632.65	0	0	0	0	164.76	103.776	0	734.4	77.143	0	0	0	0	0	0	0	0	0	0
ABCF2	0	1766.25	2124.95	0	2423.55	2001.35	0	0	0	574.89	0	266.37	0	0	0	0	0	0	0	0	0	276.28	176.775	700.71	0	0	0	1141.7	0	194.44	0	0	0	0	351.205	1413.7	47.882	113.294	308.045	741.9	0	862.495	1088.6	0	867.71	0	0	0	0
ACAT2	0	1276.79	305.02	1335.59	3027.15	2330.75	7096.9	0	2012.05	10126.5	0	3838.55	0	1108.12	312.76	249.695	1133.3	535.07	0	9425.65	7097.7	0	23253.5	16577	0	361.89	753.11	724.775	338.87	986.33	0	0	0	0	3627.55	1717.65	0	11112.9	5860.8	9296.35	276.325	3712.55	13792.5	0	8948.3	1736.4	0	358.65	0
ACBD3	0	3529.65	3615.75	0	2480.05	3593.25	0	0	0	0	0	0	0	1364.05	1503.75	0	0	0	0	1287.7	1734.35	0	1201.6	1932.35	0	0	0	2257.05	2022.1	2532.65	0	0	0	0	0	0	0	1072.43	1554.95	0	0	0	0	0	0	1426.7	1715.8	1369.5	0
ACOT9	0	2113.55	1726.2	663.22	3681.9	1286.84	0	0	0	0	0	0	1834.9	1121.19	1313.1	0	0	0	0	0	0	0	0	0	1981.4	1846	866.825	1724.65	2822.45	3264.5	0	0	0	0	3655.15	721.685	0	0	0	0	0	0	0	0	0	0	0	0	0
ACSL1	0	5298.6	3591.25	1730.3	4552.15	4818.3	0	0	0	837.36	0	1266.85	0	0	0	0	0	0	0	0	0	0	0	0	2592.55	2522.15	705.295	5245.3	1151.23	1425.15	0	0	0	0	6473.05	7530.15	1950.7	2253.5	4819.15	1516	0	752.49	1429.8	0	944.91	0	0	0	0
ACSL4	0	8890.7	4583.4	0	9803.6	9307.35	0	0	0	5075.75	0	7819.15	0	0	0	777.26	713.455	617.58	0	9267.05	4477.25	0	13232	10115.5	2749.4	2194.2	1058.65	3434.65	1300.95	2316.5	0	0	0	0	6958.75	15572.5	1274.2	9701.55	9999.9	9578.75	0	4746.85	4613.15	0	3318.7	0	0	0	0
AGFG1	0	799.55	309.974	0	1632.6	1354.1	0	0	0	0	0	0	0	0	0	0	0	0	0	0	0	0	1698	509.705	0	0	0	1323.05	677.63	969.64	0	0	0	0	0	0	0	0	0	0	0	0	0	0	0	0	0	0	0
AGL	0	1030.29	860.22	0	1116.3	1051.19	0	0	0	0	0	0	0	0	0	0	0	0	0	2922.8	1230.81	0	4062.8	2328.1	0	0	0	485.39	452.77	552.04	0	0	0	0	2220.25	1298.96	0	512.245	1252.2	1180.15	0	324.64	1248.4	0	432.905	0	0	0	0
AGPAT1	0	5365.45	7527	0	2627.2	3470.5	0	0	0	0	0	0	0	0	0	0	0	0	0	0	0	0	0	0	0	0	0	0	0	0	0	0	0	0	2520.65	5621.8	0	0	0	0	0	0	0	0	0	0	0	0	0
AHSA1	0	121.84	215.095	0	581.125	536.98	8788.4	0	1986.34	3735.5	0	4874.75	0	0	0	0	1868.6	1167.85	0	7649.85	6566.2	0	10428	17532.5	1264.75	1651.3	2170.15	943.79	1118	1291.1	0	0	0	0	2266.15	845.28	0	2062.35	1456.55	9511.2	0	5944.85	14734.9	0	9402.3	0	0	0	0
AIMP2	0	4821.7	4655.25	914.08	2911.9	2518.7	4210.35	0	3208.7	9165.65	0	3122.05	0	0	0	0	5598.8	1309.18	945.88	4338.95	3377.2	0	3450.1	5233.6	4068	3531.7	2863.75	3324.95	1556.05	3138.55	0	0	0	0	3305.15	3456.35	1713.1	7763.7	3772.7	3732.4	0	4340.35	5571.6	0	5734.45	0	0	0	0
AK2	0	1667.7	895.015	0	503.51	779.3	0	0	0	0	0	0	0	0	0	0	0	0	0	881.385	3411.15	0	17007.5	11958.5	0	0	0	0	0	0	0	0	0	0	0	0	0	5109.33	2938.05	0	0	0	1230.8	0	3931.2	0	0	0	0
ALG1	0	7001.25	2792.8	0	5054.1	3365.75	0	0	0	0	0	0	0	0	0	0	0	0	0	0	0	0	0	0	0	0	0	3099.55	0	1180.25	0	0	0	0	2738.5	2981.25	0	0	0	0	0	0	909.1	0	471.01	0	0	0	0
ALG5	0	4106.5	3262.85	0	2282.3	3071.3	0	0	0	0	0	0	0	0	0	1183.28	0	435.05	0	0	0	0	0	0	0	0	0	1264.4	0	546.835	0	0	0	0	3403.7	3286.2	0	3481.25	2970	0	0	0	0	0	0	0	0	0	0
ALOXE3	0	4164.75	5201.7	0	0	0	0	0	0	0	0	0	0	0	0	0	0	0	0	0	0	0	0	0	0	0	0	2409.6	0	961.435	0	0	0	0	0	0	0	0	0	0	0	0	0	0	0	0	0	0	0
ANKRD17	0	15944	7488	0	7623	2635.4	0	0	0	1081.15	0	5894	0	0	0	0	0	0	0	0	0	0	0	0	0	0	0	0	0	0	0	0	0	0	12880.9	6694.65	0	3589.7	3003.9	0	0	0	0	0	0	0	0	0	0
ANP32E	0	7383.75	4262.2	0	6841.85	5422.35	0	0	0	1405.35	0	2727.75	0	0	0	0	0	0	0	0	0	0	4578.35	2853.25	6947.4	2580.8	0	5204.55	297.2	3065.95	0	0	0	0	5245.65	4958.95	661.38	5949.45	5256.35	3326.5	0	1399.85	3446.35	0	2229.35	0	0	0	0
ANXA11	0	26453.5	13628.5	3812.45	11820	10122.3	21342	2773.6	6316.35	34704	0	35019.5	0	1518.15	216.87	242.52	939.34	442.91	0	14766	11612.5	0	27743.5	19922	360.03	478.23	726.245	2385.4	352.925	875.815	0	0	0	0	54250	50397.5	0	9072.2	12066.5	30026.5	2304.55	17970	53652	1712.45	32063.5	1743.35	43.577	500.04	0
ANXA4	0	7543.35	8445.45	0	0	0	4373.7	0	5714.9	4542.55	0	2666.55	0	0	0	0	0	0	0	7636.25	9737.95	0	10155.2	14778	0	0	0	0	0	0	0	0	0	0	13163	18803.5	0	5563.25	2767.85	2704.2	0	5475.6	9475.4	2213.8	6198.6	0	0	0	0
ANXA7	0	2259.1	1291.45	3191.85	3749.35	4012	9738.6	0	4784.95	10611.1	0	8630.2	0	1042.52	1645.35	1366.72	2668.75	1463.2	879.02	8563.8	7852.4	0	12864.8	11263.6	287.35	2957.6	862.12	3431.7	0	1358.1	0	0	0	0	5996.4	3979	0	6448.1	5737.25	8678.05	930.95	5920.75	11470	0	9735.35	2557.85	999.84	1056.06	0
AP1M1	0	1112.55	711.165	0	1287.9	621.94	0	0	0	1284.35	0	1238.75	0	2387.3	1868.95	1104.4	0	776.025	0	3476.15	1714.55	0	4440.65	3017.55	870.21	1103.53	614.46	1174.67	3049.55	2491.1	0	0	0	0	1375.5	933.44	0	822.615	1844.65	1493	0	2238.35	3095.05	1609.3	2247.5	1308.55	1540.35	1587.75	1144.3
AP1S1	0	846.445	726.63	0	1120.85	902.69	0	0	0	0	0	0	0	0	0	0	0	0	0	0	0	0	1872.2	1349.49	0	0	0	0	0	0	0	0	0	0	494.3	1328.15	0	0	0	0	0	0	0	0	0	0	0	0	0
APOE	0	14714.5	15535.5	1039.23	7217.3	10597.5	5169.8	0	1664.15	2629.55	0	2716.55	0	0	0	0	0	0	1619.21	2014.45	1588.65	2470.35	5023	5638.85	8199.75	3297.55	0	8368	0	2936.4	0	0	0	0	8869	18614	0	6983.55	6600.7	5163.75	0	3527.45	6437.8	0	5123.2	0	0	0	0
ARF3	0	1242.97	1057.79	3118.93	3909.2	1313.9	7531.75	0	3501	0	0	0	0	3304.35	2239.95	948.885	7155.35	3199.5	0	20948.5	10302.5	0	15417.5	18467.5	914.29	714.465	3430.75	11402	1006.01	5471.65	0	0	0	0	1504.74	1330.8	0	7698.25	8448.75	2755.16	3346.95	6576.9	7235.75	0	7110.4	3541.4	1220.33	1411	3449.4
ARF6	0	5093.45	2573.1	1749.1	8006.65	4728.7	0	0	0	15662	1054.66	7939.05	1788.45	3423.75	2203.25	1989	2758.55	2471.85	0	10444.5	7170.45	0	9611.75	5299	5068.2	4842.85	5056.9	6286.55	4301.95	5332.6	0	0	0	0	8461.55	3825.85	0	15458.5	10851	9186.3	0	5561.1	4896.9	0	4936.25	3583.55	1333.2	1266.93	3335.7
ARFGAP3	0	1093.74	2334	2259.9	3565.55	2615.9	2845.65	2525.5	2834.55	2451.45	0	1153.15	0	2096.9	2086.95	0	0	0	0	2581.45	1406.5	0	2355.5	2982	0	0	0	5678	1673	3686.15	0	0	0	0	2511.6	2215.15	0	4142.25	2027.9	1859.85	0	1595.65	1113.53	0	2629.4	0	0	0	0
ARHGAP42	0	945.39	889.315	0	0	0	0	0	0	0	0	0	0	1231.4	682.145	0	0	0	0	0	0	0	0	0	0	0	0	0	0	0	0	0	0	0	0	0	0	0	0	0	0	0	0	0	0	0	0	0	0
ARHGDIA	0	1650.15	1348	271.17	1791.1	1359.5	6866	0	1396.55	833.04	0	5939.9	0	0	0	0	3133.6	626.295	0	12678.5	8784.55	0	27382	17899	480.13	745.96	1483.9	4026.05	204.95	2092.1	0	0	0	0	2112.55	1103.75	0	3982.5	5236.05	5138.7	0	2611.75	12923	0	10387	0	0	0	0
ARHGEF6	0	3395.4	2697.05	0	3066.5	2296.95	0	0	0	0	0	0	0	0	0	0	0	0	0	0	0	0	0	0	0	0	0	0	0	0	0	0	0	0	3495	2999.2	0	3485.45	3632.95	0	0	0	0	0	0	0	0	0	0
ARL1	0	1342.7	1788.25	0	0	0	4233.45	0	984.685	0	0	0	0	0	0	0	0	0	0	1531.04	1551	0	4998.3	6580.4	0	0	0	2454.2	0	864.23	0	0	0	0	0	0	0	0	0	0	0	0	3825.05	0	3722.4	0	0	0	0
ARL6IP4	0	968.8	1222.19	0	0	0	0	0	0	0	0	0	0	0	0	0	0	0	0	0	0	0	0	0	0	0	0	0	0	0	0	0	0	0	799.19	1622.25	0	0	0	0	0	0	0	0	0	0	0	0	0
ARMC6	0	3142.05	2495.8	2020.2	2770.7	2477.6	2631.9	2571.2	2984.3	1946.15	2667.8	2416.85	3715.4	3672.85	4140.6	4039.2	4166.35	4089.2	0	0	0	0	2416.35	2707.9	2775.5	3430.55	3593.7	1817.95	3768.65	3234.7	0	0	0	0	0	0	2792.4	2280.3	2127.5	0	0	0	3254	2757.95	0	2583.05	2528.8	3705.1	2821.1
ARPC5L	0	5160.45	2922.9	0	6257.25	4872.6	0	0	0	7732.35	0	2979.75	4989.7	14390	11503.5	7574.1	31757	17557	0	13014.5	9760.8	0	3847.2	5732.45	644.06	11920.5	21671	1137.1	27407.5	12390.5	0	4716.45	2557.8	0	5344.85	2532.25	0	0	0	484.76	1693.6	2451.35	1439.6	1612.65	8904.65	13419	8275.3	10601	14649.5
ARRB1	0	4032.3	5535.05	0	4598.95	2584.65	0	0	0	0	0	0	0	894.4	334.84	553.515	666.23	298.93	0	555.655	532.2	375.05	1163.5	1408.34	863.94	0	241.98	1339.6	275.335	939.02	0	0	0	0	2861.15	1545.65	322.445	3634.65	1711.75	0	0	0	0	0	0	0	0	0	0
ASCC3	0	18621	28543	12893	25823	12600.5	21088.5	11094	11436.5	29807	8496.15	16683.5	15973.5	4375.15	6838.5	22757	13774.5	12311	0	21601	8049.65	0	0	0	0	0	0	8212.7	17869.9	15764.8	0	0	0	0	0	0	17594	21047	20754	0	0	0	0	0	0	0	29521.5	9202.85	0
ASPH	0	1445.55	908.23	0	0	0	0	0	0	0	0	0	0	0	0	0	0	0	0	0	0	0	0	0	0	0	0	2205.5	0	1087.95	0	0	0	0	0	0	0	0	0	0	0	0	0	0	0	0	0	0	0
ATP1B1	0	6044.95	3242.05	1018.3	7418.75	4259.05	0	0	0	11423.8	0	8727.3	0	0	0	0	0	0	0	8045.3	7305.65	0	5125.5	5848.85	9212.7	2019.9	0	11431.5	0	4414.7	0	0	0	0	12332	7192.9	840.02	13340	13112	7972.7	0	5423.3	6386.6	0	3348.1	0	0	0	0
ATP1B3	0	8080.85	3416.45	1155.8	7621.3	8937	5700.25	0	2754.55	6688.8	0	5875.8	0	0	0	0	0	0	0	8362.2	6136.1	0	10385.5	8129.25	10403.5	3709.1	890.64	11792.5	577.26	5414.3	0	0	0	0	10703	12805	0	9955.15	12838	6144.35	0	7023.45	8197.6	0	5074.55	0	0	0	0
ATP5MG	0	588.545	508.935	0	5219.6	3261.8	4350.95	6559.45	6154.6	10239.4	0	12147.5	0	665.125	737.665	0	0	0	0	1415.6	1292.35	0	1664.75	1376.25	0	0	0	42523	1034.26	22037	0	0	0	0	11325	12698.5	302.09	19663.5	13600.6	8141.85	0	4473.65	3459.1	0	4466.6	0	0	0	0
ATP5PO	0	251.91	246.755	0	2734.5	2309.15	0	0	0	519.83	0	2606.6	0	0	0	0	0	0	0	0	0	0	0	0	0	0	0	106790	627.36	52505	0	0	0	0	3054.2	2423.95	0	6252.15	12123.5	489.375	0	188.185	0	0	0	0	0	0	0
ATXN10	0	10818	7021.55	0	9472.9	5381	0	0	0	1844.75	0	1156.7	0	0	0	177.42	4876.5	1529.95	0	2020.4	959.795	0	5843.05	3484.3	0	963.77	1149.81	486.31	641.57	778.975	0	0	0	0	7336.6	3519.95	0	6351.65	2897.2	2502.35	0	1657.5	3860.3	0	2039.25	1034.87	0	684.01	0
AURKA	0	1852.5	2951.7	0	549.177	3000.3	0	0	0	0	0	0	0	0	0	0	0	0	0	0	0	0	0	0	1439.07	878.03	1405.9	630.4	2332.65	1358.65	0	0	0	0	1050.44	3421.15	0	922.19	917.41	0	0	0	0	0	0	0	0	0	0
BAIAP2	0	2136.1	9166.55	0	1066.65	1953.6	0	0	0	0	0	0	1314.8	1892.1	1803.85	0	0	0	0	0	0	0	1527.4	1466.35	1846.1	0	1544.35	834.545	1810.45	1908.55	0	0	0	0	1419.7	944.63	2202.35	1861.9	2161.55	1296.05	468.5	1773.45	0	0	0	0	0	0	0
BCAP29	0	1836.1	900.675	0	1930.05	1251.5	0	0	0	0	0	0	0	0	0	0	0	0	0	0	0	0	0	0	0	0	0	0	0	0	0	0	0	0	2281.8	1516.15	0	1540.3	1252.45	0	0	0	0	0	0	0	0	0	0
BCAS2	0	4721.25	3515.1	2436.5	2974.7	1488.05	0	0	0	0	0	0	2391.05	2219	3880.55	1582.3	2335.35	1788.15	0	0	0	0	449.035	497.92	4650.45	3507.7	2903.3	1597.9	2576.75	2499.4	0	3852.4	1404.5	0	2252.5	916.375	640.3	4394.45	1825.8	0	0	0	0	0	0	507.65	3754.85	2146.55	0
BET1	0	2536.65	844.465	0	2454.4	1159.03	0	0	0	0	0	0	0	0	0	0	0	0	0	0	0	0	0	0	0	0	0	2541	0	600.2	0	0	0	0	837.625	1655.4	0	0	0	0	0	0	0	0	0	0	0	0	0
BRAF	0	4116.3	1345.7	0	3136	2705.8	0	0	0	0	0	0	0	0	0	0	0	0	0	0	0	0	0	0	3984.1	755.235	0	3105.75	0	1365.85	0	0	0	0	3584.95	1888.85	0	1454.55	1542.25	0	0	0	0	0	0	0	0	0	0
BRIX1	0	791.25	446.27	0	1242.4	642.45	0	0	0	0	0	0	0	0	0	0	0	0	0	0	0	0	0	0	0	0	0	1849.55	0	1003.73	0	0	0	0	772.54	556.285	0	927.54	661.155	0	0	0	0	0	0	0	0	0	0
BSG	0	2366.8	2767.1	0	3357.55	1341.65	1440.1	0	714.26	3630.4	0	488.545	0	0	0	0	0	0	0	5741.15	5680.7	778.14	2095.95	3993.85	5325.5	2005.82	394.03	7725.15	0	4127	0	0	0	0	4979.1	5687.1	0	7730	4940.95	0	0	0	1878.05	0	2861.7	0	0	0	0
BUD23	0	2994.05	3936.45	0	4112.3	4257.6	0	0	0	0	0	0	0	0	0	0	0	0	0	0	0	0	0	0	0	0	0	0	0	0	0	0	0	0	5271.05	4161.25	0	3367.3	1832.45	821.07	0	1146.83	0	0	0	0	0	0	0
BYSL	0	5384.45	4989.85	0	3817.9	6396.8	0	0	0	0	0	0	2302.9	569.395	476.81	2226.9	306.835	814.255	0	0	0	0	0	0	2157.1	917.38	930.885	2983.25	1058.01	1530.75	0	2884.4	2389.25	0	2090.6	3113.85	585.45	1064.3	1629.45	1474.95	794.94	429.855	1028.12	0	693.945	2529.2	2890.4	1507.4	1993.75
C11orf98	0	8847.1	3662.6	0	9065.55	2621.4	3389.05	0	1866.5	5874.25	0	4578.85	5422.3	0	2255.3	4071.4	638.85	2439.2	4983.75	3045.85	2752.5	6384	1733.45	2685	9855.35	5617.3	1968.75	4629	2399.34	4342.7	0	7377.4	8458.25	0	7678.55	4164.3	5225.4	8888.4	5738.65	1506.59	0	4048.4	2373.45	0	2192.55	0	3966.45	2055.75	0
C1orf116	0	13245	8698.15	7026.9	31306.5	13117	64226	15897.5	49122	48765	9193	63090	0	14859	14430	11125	13271.5	13342	0	38719.5	33443	0	36796	29907.5	0	0	0	174610	11007.6	114326	0	0	0	0	15334	15090.5	0	22024	23249.5	65906.5	0	31632.8	66622	0	55693	0	0	0	0
C7orf50	0	365.185	3045.2	0	0	0	0	0	0	0	0	0	0	0	0	0	0	0	0	0	0	0	0	0	0	0	0	743.735	0	573.955	0	0	0	0	0	0	0	0	0	0	0	0	0	0	0	0	0	0	0
CAB39	0	5764.1	2677.55	0	3781.85	2278.7	3830.65	0	1338.2	5915.45	0	4565.55	0	0	0	0	0	0	0	2795.05	1053.27	0	3640.1	2085.35	0	0	0	2202.85	549.855	1664.75	0	0	0	0	5101.75	2984.25	0	1943.7	2216.3	5051.45	0	1400.5	6295.95	0	3963.45	0	0	0	0
CAD	0	1755.15	663.17	0	1330.15	1245.9	7140.7	0	485.565	2039.7	0	3683.05	0	0	0	0	0	0	0	8409.5	3995.75	0	13338.5	16663.5	0	0	0	5629.75	302.675	2597.35	0	0	0	0	2517.65	5478.35	0	1564.95	2100.05	7155.65	0	2744.2	8463.2	0	7483.8	0	0	0	432.21
CALM3	0	8986.5	5313.1	0	10090.8	5296.9	6120.05	0	5116.15	6646.85	1544.9	4785.75	9729.75	4773.75	6418.5	1454.3	8325.55	7738.3	0	20081	23128	0	50928	29606	59850.5	31972	9911.5	46224.5	3276.1	25761	0	15659	9031.9	0	12335.1	4158.5	0	33852.5	22331.5	3910.2	0	6069.75	12746.5	1432.3	7756.45	2918.95	7309.25	4575.15	4580.1
CAPN1	0	477.455	541.84	348.36	356.769	1393.72	6796.5	0	1016.03	3219.15	0	2799.4	0	1836	394.06	378.53	2487.95	1162.95	0	10464	3646.25	0	8749.9	13746.5	64.278	602.52	2155.9	1180.37	1282.21	1370.15	0	0	0	0	1297.9	4124.6	0	2863.9	2959.4	10578.5	0	10555	15831.5	612.44	14137	0	0	0	0
CBLL1	0	2455.05	3386.15	558.12	1650.6	1922.05	0	0	0	0	0	0	0	0	0	0	0	0	0	0	0	0	0	0	0	1720.1	2837.8	0	2187.15	1347.75	0	0	0	0	1514.9	1919.8	0	663.25	1075.64	0	0	0	0	0	0	0	0	0	0
CBX1	0	1578.2	455.965	0	0	0	0	0	0	5614	0	1682.5	0	2904.2	1820.4	0	0	0	0	7101.65	4537.6	0	18886.5	14762.5	1030.84	2674.25	3426.6	2995.6	2769.15	3549.6	0	0	0	0	1347.5	832.245	0	7221.7	3859.35	0	0	0	3107.25	0	519.335	4631.55	0	2149.75	0
CCDC134	0	886.255	522.03	0	1545	858.22	0	0	0	0	0	0	0	0	0	0	0	0	0	0	0	0	0	0	0	0	0	0	0	0	0	0	0	0	1614.05	493.66	0	0	0	0	0	0	0	0	0	0	0	0	0
CCDC47	0	1622.95	649.09	0	2532.65	688.755	0	0	0	774.665	0	1577.65	0	0	0	0	0	0	0	0	0	0	3060.15	2738.05	0	0	0	0	0	0	0	0	0	0	4470.15	1720.2	0	5772.9	3957.85	496.52	0	7833.25	6393.95	0	4998.35	0	0	0	0
CCDC6	0	1008.92	1775.7	1083.42	1661.65	1241	5888.2	0	1938.95	5274.9	771.69	5344.05	0	0	0	0	0	0	0	6080.25	4281.4	0	4020.7	3857.05	0	0	0	0	0	0	0	0	0	0	2834.8	2325.45	704.55	3100.25	2540.4	5261.2	0	723.19	2670.7	0	6496.3	0	0	0	0
CD9	0	2500.8	1235.6	0	0	0	0	0	0	837.59	0	741.975	0	0	0	0	0	0	0	0	0	0	1811.57	2491.3	0	0	0	4789.35	0	2867.45	0	0	0	0	7631.35	5055.75	0	6213.3	6460	0	0	0	2172.4	0	2374.55	0	0	0	0
CDC123	0	2643.1	2378.95	0	2308.9	2944.15	0	0	0	0	0	0	0	2963.15	2592.6	2750.2	2920.5	2990.45	0	0	0	0	1940.3	1383.45	0	921.97	1562.5	418.41	1731.45	1476.15	0	0	0	0	1852.95	2318.7	0	0	0	0	0	0	0	0	0	1443.35	1296.05	1512.05	0
CDH17	0	1377.3	848.635	0	1482.3	1090.66	0	0	0	0	0	0	0	0	0	0	0	0	0	0	0	0	0	0	0	0	0	0	0	0	0	0	0	0	1905.65	1250.95	0	3434	1738.85	0	0	0	0	0	0	0	0	0	0
CDK11B	0	3931.65	3180.8	0	3416.85	2401.45	0	0	0	1742.8	0	1139	0	1203.75	1236.68	936.085	399.44	653.76	0	882.48	743.46	0	1350.6	932.375	3191.7	1744.3	906.58	1062.3	1460.1	1448.55	0	0	0	0	3952.2	1968.75	3071.6	4067.35	2234	1476.1	1003.2	1031.05	1659.1	863.91	812.61	0	0	0	0
CDK5RAP1	0	31482.5	29697	0	11585.5	20048.5	26863.5	0	2288.7	8690.6	0	3247.2	0	12152.5	13792.6	0	0	0	0	17491	2379.35	0	17744.5	13929.5	0	0	0	2313.9	17512.5	7942.6	0	0	0	0	0	0	0	15131	15899.5	0	0	0	9556.8	0	14578	0	0	0	0
CDK7	0	4784.5	2212.2	0	2837.15	2426.25	0	0	0	0	0	0	0	919.66	917.14	0	0	0	0	0	0	0	1562.45	1538.93	0	0	0	2906.15	2056.3	1331.6	0	0	0	0	3513.05	2951.8	3278.9	463.86	3767.9	0	0	0	0	0	0	0	0	0	0
CELF1	0	801.89	700.83	0	781.3	745.36	0	0	0	0	0	0	0	0	0	0	0	0	0	0	0	0	0	0	0	0	0	0	0	0	0	0	0	0	555.95	790.99	0	1270.35	786.625	0	0	0	0	0	0	0	0	0	0
CERS2	0	8146.15	5744.15	0	8775.25	5983.05	0	0	0	2969.1	0	984.75	0	0	0	0	0	0	0	0	0	0	0	0	17733.5	4987.25	366.96	13903.5	0	6874.35	0	0	0	0	9356.9	7810.65	655.22	10525	6367.95	0	0	0	1089.34	0	451.805	0	0	0	0
CETN2	0	2468.9	2205.15	0	1992.15	2229.45	0	0	0	0	0	0	0	0	0	0	0	0	0	0	0	0	0	0	0	0	0	0	0	0	0	0	0	0	2678.85	2008.85	0	0	0	0	0	0	0	0	0	0	0	0	0
CGN	0	779.58	588.42	0	0	0	2890.3	0	1211.2	28845.5	0	21251.5	0	0	0	0	0	0	0	1646.25	527.165	0	2917.7	1477.4	0	0	0	0	0	0	0	0	0	0	225.38	174.87	0	593.86	197.515	3551.9	0	2105.5	9203.05	0	5064.1	0	0	0	0
CHEK1	0	2989.8	2947.1	1108.8	1707.9	2219.3	0	0	0	0	0	0	0	0	0	0	0	0	0	0	0	0	0	0	0	0	0	0	0	0	0	0	0	0	2732.5	2203.45	1818.83	1446	1677.85	0	0	0	0	0	0	0	0	0	0
CHMP4B	0	973.875	1108.85	0	0	0	3785.7	0	1674.15	0	0	0	0	0	0	0	0	0	0	6632.3	4755.25	0	11499	12357	0	0	0	1306.98	0	641.38	0	0	0	0	610.665	2959.65	0	2253.85	3019.35	3252.45	0	3792.5	7333.2	0	6629.35	0	0	0	0
CHP1	0	2205.45	804.305	0	0	0	0	0	0	0	0	0	1193.9	321.2	546.35	0	0	0	0	0	0	0	0	0	6348.7	2220.9	563.55	2408.35	604.918	797.895	0	0	0	0	0	0	0	788.18	1486.75	0	0	0	0	0	0	0	0	0	0
CIAO1	0	3515.35	3877.35	0	4777.55	2494.85	0	0	0	7145.85	0	5409.75	0	0	0	0	0	0	0	2236.55	1337.8	0	2493.9	1986.65	3342.55	2682.55	5121.3	0	0	0	0	0	0	0	5742.65	4002.4	0	5233.6	3712.7	3013.15	0	2292.25	3432.3	0	991.345	0	0	0	0
CKS1B	0	4147	4315.6	387.44	3052.45	2598.7	1581.35	2188.2	1565.15	0	0	0	3272.5	3009	4094.95	0	3125.85	2208.65	0	2845.45	2381.9	0	3933.85	2856.9	3261.75	3931.1	3518.55	6132.7	3927.45	5380.65	0	0	0	0	0	0	0	0	0	0	0	0	0	0	0	1617.6	4391.05	4148.95	0
CLINT1	0	157.945	225.22	0	486.21	311.78	0	0	0	11711.3	0	5320.35	0	0	0	0	0	0	0	2242.55	815.25	0	2847.15	1711.4	0	0	0	0	0	0	0	0	0	0	1423.25	524.225	0	4110.05	1986.6	2131.15	0	1209.8	2372.35	0	1217.85	0	0	0	0
CLTB	0	1948.35	1498.3	0	0	0	0	0	0	2417.25	0	4145.4	0	0	0	0	0	0	0	1715.85	2914	0	1231.3	1486.1	0	0	0	0	0	0	0	0	0	0	0	0	0	2066	1784.5	0	0	0	0	0	0	0	0	0	0
CLTCL1	0	1274.15	1242.8	0	0	0	1758.4	0	2258.55	0	0	0	0	0	0	0	0	0	0	0	0	0	0	0	0	0	0	0	0	0	0	0	0	0	351.095	590.08	0	1175.5	1691.35	0	0	0	0	0	0	0	0	0	0
CMBL	0	957.715	498.97	970.52	2389.75	703.645	0	0	0	1097.05	517.06	610.295	1206.9	1015.26	1422.1	1040.6	701.15	1005.8	0	0	0	0	420.865	489.57	1116.4	1434	957.855	128.39	996.435	863.58	0	0	0	0	0	0	0	3177.55	785.925	0	0	0	0	0	0	1071.2	794.37	1054.1	1071.86
CMC1	0	4341.45	5222.65	0	0	0	0	0	0	0	0	0	4187.1	3438.55	4908	1297.9	6362.85	3298.65	0	0	0	2857.4	2520.35	2227.45	5038.3	4571.1	5133.4	6584.5	4109.05	4974.55	0	0	0	0	933.365	1934.5	0	0	0	0	0	0	0	0	0	2501.4	3709.2	4162	2261.85
CMPK1	0	844.11	561.755	1164.7	1085.6	823	2684.25	2244.4	1512.35	1783.2	0	2433.3	400.59	1684.28	872.035	1587.75	2668.3	1405.98	0	4316.25	2329.75	0	9284.15	6183.1	0	0	0	0	0	0	0	0	0	0	1031.55	513.11	0	3911.55	4088.15	0	0	0	5686.15	0	3431.9	0	1787.05	817.44	0
CMYA5	0	6066.25	7919.7	0	7255.25	7324.3	0	0	0	0	0	0	0	0	0	0	0	0	0	0	0	0	0	0	0	0	0	0	0	0	0	0	0	0	0	0	0	0	0	0	0	0	0	0	0	0	0	0	0
CNOT9	0	1391.35	837.865	0	3836.85	2087.55	0	0	0	5450.5	0	1270.35	0	0	0	468.07	500.83	489.71	0	0	0	0	2517.6	805.71	0	0	0	0	1200.35	502.175	0	0	0	0	5395.7	1727.8	0	5678.9	3993.5	0	0	0	0	0	0	0	0	0	0
COX5A	0	2730.3	293.667	0	6349.3	3636.45	0	0	0	9089.75	0	6242.45	0	0	0	0	0	0	0	0	0	0	4474.1	2199.45	0	0	0	59367.5	0	26982.5	0	0	0	0	8640.25	5475.45	0	46000	31873	0	0	0	0	0	0	0	0	0	0
CPNE1	0	826.175	228.15	5047.85	1584.6	2093.6	9236.35	0	2861.9	4009.75	0	3089.65	0	0	0	188.34	1682.15	3282.7	0	7372.55	10394	0	8454.1	17482	0	0	0	902.445	56.475	443.075	0	0	0	0	3226.6	2038.55	0	5110.25	3078.6	3443.15	3280.8	5245.9	7794.8	0	6251.2	0	0	0	0
CPSF1	0	6008.5	4544.3	0	594.83	912.075	0	0	0	0	0	0	0	0	0	0	0	0	0	0	0	0	0	0	1663.65	631.36	612.36	0	0	0	0	0	0	161.27	600.055	2855.05	1572.41	0	306.575	0	0	0	0	0	0	0	0	0	0
CPSF2	0	4980	1369.4	0	1040.95	912.735	0	0	0	0	0	0	0	0	0	0	0	0	0	0	0	0	0	0	0	0	0	0	0	0	0	0	0	0	1042.38	644.445	0	0	0	0	0	0	0	0	0	0	0	0	0
CSRP1	0	1662	1727.45	0	792.48	2963.7	28517	3692.15	19019.5	76104.5	1032.4	46307.5	1256.6	9330.95	5340.9	0	15003.5	5151.65	0	71058.5	55744.5	0	35537	38403	0	7222	14534	5306.85	14794	12384.5	2409.3	2546.65	2169.1	0	1220.05	3432.1	0	9878.8	8950	27499	0	24449	35308	6983.4	39077	11282	2050.05	4455.85	9859.55
CSTB	0	3667.8	3897.6	744.065	3208.3	4256.9	1366.45	0	1776.05	0	0	0	757.07	1044.6	954.81	365.22	2858.55	1097.45	0	5457.8	6766.95	0	4788.05	5831.7	1026.72	1699.65	1748.9	6821.25	576.13	3339	0	0	0	0	1584.45	2528.95	0	5214.7	4284.3	0	0	0	0	0	0	707.98	1165.41	814.855	0
CSTF1	0	3145.05	974.625	0	1106.25	624.01	0	0	0	0	0	0	0	0	0	0	0	0	0	0	0	0	0	0	0	0	0	0	487.455	467.46	0	0	0	0	2380.95	849.195	0	1286.38	655.665	0	0	0	0	0	0	0	0	0	0
CSTF2	0	1614	2730.75	0	0	0	0	0	0	0	0	0	4495	1209.15	1333.8	949.25	4192	1388.45	0	0	0	0	0	0	9007	7612.95	6309	5162.2	4149.8	5657	0	0	0	0	0	0	0	0	0	0	0	0	0	0	0	752.68	5849.45	3131.4	0
CTNNBL1	0	1655.35	896.945	0	1802.75	1183.2	0	0	0	1773.65	0	1457.95	0	0	0	0	0	0	0	0	0	0	2544.1	1713.4	0	0	0	1443.5	879.545	999.015	0	0	0	0	1569.85	1519.1	0	2020.7	1607.8	1879.35	0	906.985	1726.2	0	969.44	0	0	0	0
CTSD	0	358.325	1312.8	3467	586.085	1379.25	10444.5	0	2539.35	1777.5	0	4617.65	0	1040.25	742.68	495.79	2144.85	1428.65	0	8465.85	4357.7	0	25307	25474	609.125	914.705	1853.7	5031.1	671.055	1426.15	0	0	0	0	709.795	1911.85	0	1758.2	2587.4	8461.35	0	3331.4	13637	914.99	11924	3289.65	0	1158.45	1049.61
CTTN	0	964.19	711.06	0	0	0	0	0	0	58188.2	19602.5	62729.2	0	0	0	0	0	0	0	0	0	0	0	0	0	0	0	0	0	0	0	0	0	0	844.305	1356.4	0	0	0	0	0	0	36702.8	15462	25753.8	0	0	0	0
CUL2	0	5485.7	7851.55	0	8096.4	11438.4	0	0	0	0	0	0	0	0	0	0	0	0	0	0	0	0	20854.5	14833.5	0	0	0	0	0	0	0	0	0	0	10020.6	10353.5	0	4134	7251.95	0	0	0	0	0	0	0	0	0	0
CUL4A	0	1994.85	1477.5	0	2572.3	1634.45	0	0	0	3067.95	0	1798.45	0	0	0	0	0	0	0	1977.2	569.435	0	4480.85	2678.35	0	0	0	0	1013.35	690.585	0	0	0	0	3290.2	2284.45	0	5473.15	3746.75	0	0	0	0	0	0	0	0	0	0
CWC22	0	12023	4099.5	0	2709.1	2467.8	0	0	0	0	0	0	0	0	0	0	0	0	0	0	0	0	0	0	0	0	0	0	0	0	0	0	0	0	10487.4	4122.15	0	1583.96	1402.25	0	0	0	0	0	0	0	0	0	0
CYFIP1	0	2946.8	1142.8	1266.8	3583.5	1711.85	0	0	0	1835.76	3284.4	1232.25	637.27	685.535	685.43	0	0	0	1321.4	1980.45	911.705	1833.7	1673.4	2270.4	1258.45	1220.1	444.31	807.215	537.31	795.295	0	0	0	2661.85	5768.35	1665.2	5114.15	3434.9	3652.6	1256.1	0	1392.3	1298.05	0	1152.22	0	0	0	0
CYP2S1	0	5732.55	5713.6	0	1149.3	2739.7	0	0	0	1806.05	0	2004.05	0	0	0	0	0	0	0	0	0	0	0	0	3738.25	1653.6	0	6041.4	0	1619.1	0	0	0	0	3871.85	5426.9	763.98	3534.65	2721.1	0	0	0	0	0	0	0	0	0	0
CYSTM1	0	2043.45	1122.6	0	4525.5	2135.6	0	0	0	0	0	0	0	0	0	0	0	0	0	0	0	0	0	0	0	0	0	0	0	0	0	0	0	0	4859.6	2059.5	0	7362.05	5393.75	0	0	0	0	0	0	0	0	0	0
DBNL	0	167.515	250.37	0	0	0	5366.1	296.48	3085.05	18632.5	0	25750	0	846.025	171.308	0	1298.9	268.295	0	14502.5	12259	0	8231.75	8060.85	0	0	0	97.828	568.455	286.365	0	0	0	0	983.465	1119.85	0	1591.75	1334.55	6129.75	0	3896.6	28605.9	0	15012.2	0	0	0	0
DCAF8	0	1689.65	1953	0	1275.72	1529.45	0	0	0	0	0	0	0	0	0	0	0	0	0	0	0	0	793.78	569.795	0	0	0	0	0	0	0	0	0	0	1289.9	2313.75	0	298.43	1056.13	0	0	0	0	0	0	0	0	0	0
DCUN1D5	0	9613.75	6825.9	0	10139.1	8135	761.86	0	669.87	2191.05	0	1380.6	0	0	0	0	0	0	0	915.45	612.555	0	2013	1469.08	966.115	1732.1	0	28654.5	353.275	14896	0	0	0	0	8618.95	6900.75	3603.8	1443.7	4381.3	2789.85	0	620.115	0	0	0	848.29	1161.63	702.52	0
DDA1	0	5309.25	3896.15	0	2175.9	2451.9	0	0	0	1602.9	1408.9	2596.5	2924.43	1561.8	637.115	0	0	0	0	0	0	0	6472.1	4717.45	0	3858.05	1055.56	0	1263	1195.25	0	0	0	0	6267.55	1978.1	0	2949.95	5341.55	6367.7	0	2532.9	5747.5	0	3558.2	783.3	1367.3	1465.25	0
DDX19B	0	1063.05	338.01	0	1429.75	661.42	0	0	0	1567.6	0	738.625	0	0	0	0	0	0	0	0	0	0	0	0	0	0	0	0	0	0	0	0	0	0	1536.75	748.08	0	2198.55	1207.4	0	0	0	0	0	0	0	0	0	0
DDX27	0	1547.46	1024.11	148.28	868.115	1924	0	0	0	0	0	0	981.7	0	546.875	1790.1	389.01	631.89	0	0	0	0	0	0	3899	395.325	636.33	5433.85	436.77	2588.5	1907.7	1864.65	1228.6	0	745.545	508.545	430.345	207.085	590.115	0	0	0	0	0	0	295.575	1477.25	413.87	0
DDX41	0	13648.5	7502.9	0	7278.15	6856.7	0	0	0	0	0	0	1259.1	1526.3	1202.27	1080.89	0	485.655	0	0	0	0	674.07	795.745	0	0	0	0	0	0	0	0	0	1134.1	4217.95	5741.2	6351.2	2527.25	3058.6	1290.65	0	965.485	965.32	0	606.895	0	0	0	0
DERL1	0	1154.45	1052.9	0	0	0	0	0	0	0	0	0	0	0	0	0	0	0	0	0	0	0	0	0	0	0	0	1609.3	0	486.75	0	0	0	0	0	0	0	0	0	0	0	0	0	0	0	0	0	0	0
DHRS7B	0	6693.95	6606.05	0	5015.85	6136.65	0	0	0	0	0	0	0	0	0	0	0	0	0	0	0	0	0	0	5272.7	2496.6	0	6252.75	0	3120.25	0	0	0	0	4393.1	7543.25	0	2092.15	3532.2	1487.4	0	753.715	0	0	0	0	0	0	0
DHRSX	0	4394.65	4866.25	0	0	0	0	0	0	0	0	0	4268.75	0	1372.25	3029.45	0	1971.9	0	0	0	0	0	0	3614.95	2071.8	651.28	1543.95	0	1015.49	0	4162.3	4282.7	0	0	0	0	0	0	0	0	0	0	0	0	0	0	0	0
DIS3	0	1374.8	1088.28	0	857.115	720.745	0	0	0	3860.25	0	733.325	0	0	0	0	0	0	0	0	0	0	1257.2	994.73	0	0	0	494.495	0	473.88	0	0	0	0	648.465	1135.28	0	2949.75	1310.25	0	0	0	0	0	0	0	0	0	0
DLD	0	1472.21	556.295	0	3594.5	2596.35	1354.6	0	207.345	2995.15	0	4193.1	0	0	0	0	0	0	0	333.435	207.73	0	7604.2	4434.8	186.745	253.56	321.625	13004.5	486.705	5898.8	0	0	0	0	2527.4	2141.15	0	14299	13330.5	1708.5	0	439.975	5945.05	0	1713.7	0	0	0	0
DNAJA3	0	20047.5	14651	0	13236	4558.95	0	0	0	0	0	0	0	0	0	0	0	0	0	0	0	0	0	0	0	0	0	24810.5	5463.1	19867	0	0	0	0	16103	5406	0	16724.5	17057.5	0	0	0	0	0	0	0	0	0	0
DNAJB11	0	2800.85	1465.9	455.18	1441.05	1912.85	0	0	0	3164.45	0	1085.33	0	0	0	0	0	0	0	0	0	0	1011.47	1192.6	3226.7	3007.15	4377.25	2132.55	4170.65	3090.6	0	0	0	0	3114.25	2850.15	2259.3	4053.5	2747.15	0	0	0	0	0	0	0	0	0	0
DNAJB6	0	5978.2	2813.65	3281.35	4372	4284.7	0	0	0	5220.35	0	5510.7	0	0	0	3773.85	3617.65	3863.35	0	0	0	0	0	0	4491.05	4876.55	5271.7	3628.35	3475.45	3954.75	0	0	0	0	7858.65	5273.2	7063.9	6575.5	5706.65	0	0	0	2991.2	0	3153.65	0	0	0	0
DNAJC13	0	1934.7	2012.95	0	5150.1	2596.85	0	0	0	0	0	0	1131.65	713.34	945.525	2997.95	878.4	1155.81	0	0	0	0	0	0	1214.8	905.595	758.995	507.705	1025.12	714.425	0	0	0	0	5325.3	2872.15	0	6347.5	4487.1	0	0	0	0	0	0	1138	5151.55	2833.6	880.165
DNAJC9	0	1526	2307.55	0	3001.45	1360.6	0	0	0	0	0	0	896.34	849.78	922.505	1606.45	1032.7	1585.7	0	1301.89	1290.55	0	2953.25	2046.15	1405.65	1359.4	1440.95	1700.45	955.81	1706.9	0	0	0	0	2085.7	1221.65	0	868.39	1929.8	0	0	0	2107.65	0	1645.85	654.92	2108.35	1027.5	0
DPAGT1	0	6000.5	4531.1	0	6092.5	6550.9	0	0	0	0	0	0	0	0	0	0	0	0	0	0	0	0	0	0	0	0	0	0	0	0	0	0	0	0	6657.7	4389.9	0	3513.25	4089.75	0	0	0	0	0	0	0	0	0	0
DPP7	0	2046.85	2852.7	2034.1	3453.4	4060.85	3076.3	0	1834.6	0	0	0	0	6612	4712.95	2181.35	11556.1	5184.9	0	6156.5	4147.2	0	10310	6314.7	1120.1	3507.55	6380.25	249.44	4403.4	3268.5	0	0	0	0	984.9	1804.3	0	1745.35	875.01	889.875	4519.05	2435.4	763.575	1126.2	1939.7	4823.35	795.34	2135.35	4320.85
DTYMK	0	1240.1	976.925	0	625.865	903.895	1653	0	1025.81	2431.2	0	1008.9	0	0	0	0	0	0	0	0	0	0	2520.3	2925.85	0	0	0	0	0	0	0	0	0	0	1175.1	980.71	0	2092.45	1475.2	1427.15	0	1976.5	3169	0	2000.75	0	0	0	0
DYNC1LI2	0	1530.65	979.95	1253.8	2183.85	1939.05	2997.15	0	1475.4	2251.45	0	4015.4	0	3497.85	2234.15	862.06	3478.3	1781.25	0	13686	8825.55	0	16241.5	12934.5	746.49	2434.05	3895.35	2219.65	3388.2	2371.7	0	0	0	0	2412.05	2705.05	0	1105.98	2530.65	4531.7	0	1434.55	4395.1	0	2502.95	2016.75	579.06	1090.5	0
DYNLRB1	0	2275.35	2251.6	1374.2	2537.05	2858.95	0	0	0	0	0	0	5041.05	2617.75	4520.1	1927.85	6960.75	3905.6	0	1404.35	1000.37	0	2025.7	3367.1	0	3926.85	5317.7	10164	2827.15	6333.05	4352.7	11898	12296	0	0	0	0	0	0	0	0	0	0	0	0	2203.95	5963.65	5051.1	2493.9
DYNLT3	0	2208.15	1847.6	1661.7	3517.3	2576.15	0	0	0	0	0	0	0	0	0	0	0	0	0	0	0	0	3169.45	2805.15	0	0	0	0	0	0	0	0	0	0	0	0	0	0	0	0	0	0	0	0	0	0	0	0	0
EBP	0	12634	15935.5	928.29	9794	13909	0	0	0	4340.35	0	2131.95	0	0	0	0	0	0	0	0	0	10534.5	152.32	3801.05	18793.5	8911.25	544.75	13963.5	624.97	8487.35	0	0	0	0	20527	20761	0	18265	13423	5130.5	0	4783.8	0	0	0	0	0	0	0
ECD	0	10259.3	4240.9	0	3885.75	5830.95	0	0	0	2612.85	0	2711.05	0	0	0	0	0	0	0	0	0	0	0	0	0	0	0	461.235	1055.12	836.1	0	0	0	0	4221.65	5582.15	1954.1	4146.25	2067.65	1275.8	0	811.51	715.485	0	674.5	0	0	0	0
ECHS1	0	557.37	279.47	2273.75	2119.2	1673.3	11387	0	4606.25	7083	0	6631.7	0	1686.6	732.295	945.63	1849.8	1168.79	0	7848.65	4497.85	0	14528.5	11328.5	0	597.96	1007.7	1736.6	673.08	1090.73	0	0	0	0	3024.75	1228.95	0	7592.8	6230.7	9698.45	633.73	6365.7	15738	649.6	11912	1589.65	0	344.397	0
ECPAS	0	16194	7481.8	0	13874.5	6839.5	0	0	0	2818.9	0	567.825	0	0	0	0	0	0	0	379.55	214.61	0	1555	890.53	2356.6	1120.97	767.425	1373.28	165.88	639.305	0	0	0	0	17578.5	15030.5	438.33	8045.45	8380.95	1306.55	0	382.51	927.385	0	502.75	0	0	0	0
EDC4	0	4731.85	2333.6	0	4476.9	3790.8	0	0	0	1721.4	0	942.985	0	0	0	0	0	0	0	0	0	0	1957.6	1336.35	2764.55	712.91	161.12	5575.4	309.505	1680.45	0	0	0	0	4648.25	3284.8	292.5	5839.65	4024.65	0	0	0	0	0	0	0	0	0	0
EEF1A2	0	2736.35	532.6	0	3492.05	1908.25	0	0	0	0	0	0	0	0	0	0	5993.65	1101.9	0	0	0	0	0	0	0	0	0	0	0	0	0	0	0	0	2617.8	597.62	0	3559.45	2208.75	0	0	0	0	0	0	0	0	0	0
EEF1E1	0	3647.9	7328.55	0	0	0	0	0	0	0	0	0	0	2998.1	1902.51	997.85	6343.3	2902.55	0	4060	1781.6	0	2931.65	4112.6	2552.9	3211.3	3973.15	2853.45	3035.3	3563.2	0	0	0	0	0	0	0	0	0	4923.2	0	3313.95	7314.7	0	5783.9	1587.1	1000.36	1553.3	1712.3
EIF1AD	0	7134.5	4775.7	0	4651.4	5803.3	0	0	0	7073.9	308.09	5618.75	1594.1	1189.55	936.215	787.535	681.155	731.055	0	0	0	0	1571.75	352.975	0	0	0	0	0	0	0	2805.5	883.305	0	6392.6	4419.85	0	6606.65	2651.2	2238.85	0	1240.05	2654.85	1628.9	1114.15	0	0	0	0
EIF2B4	0	2023.2	1572.55	0	2831.15	1713.95	0	0	0	2089.15	0	1572.6	0	0	0	0	0	0	0	0	0	0	0	0	0	0	0	0	740.14	775.05	0	0	0	0	3431.75	1966.6	742.17	2893.5	2145.3	0	0	0	743.015	0	586.02	0	0	0	0
EIF4G3	0	1726.75	1458.55	0	0	0	0	0	0	0	0	0	0	0	0	0	0	0	0	0	0	0	0	0	0	0	0	0	0	0	0	0	0	0	1490.45	1957.5	0	0	0	0	0	0	0	0	0	0	0	0	0
ELOC	0	4215.2	2823.25	0	2344	2251.25	3976.8	0	1937.55	449.69	0	1353.85	0	2045.3	1538.7	893	3335.5	1387.7	0	4608.2	2851.35	0	9790.9	7396.25	2506.5	2946.6	2691	2325.75	2352.25	2828.05	0	0	0	0	2746.5	3281	1157.4	3953.45	4266.55	3439.3	0	2739.8	6729.2	0	4600.05	1601.9	218.14	411.89	0
ELOVL5	0	9729.55	5906.1	0	10097.5	7110.55	0	0	0	0	0	0	0	0	0	0	0	0	0	0	0	0	0	0	0	0	0	6205.15	0	3391.4	0	0	0	0	10268	6382.3	700.28	10321	6731.6	0	0	0	0	0	0	0	0	0	0
EMD	0	1294.4	948.995	0	1380.8	1096.7	0	0	0	0	0	0	0	0	0	0	0	0	0	0	0	0	0	0	0	0	0	1526	0	449.43	0	0	0	0	1425.2	1358.7	0	1596.4	1257.95	0	0	0	0	0	0	0	0	0	0
ENAH	0	3892.85	1456.35	0	3665.9	1642.35	1569	0	749.37	31306	0	28965	0	0	0	0	0	0	0	2362.05	1650.05	0	2349.95	1202.25	0	0	0	414.92	132.75	636.7	0	0	0	0	2305.15	587.51	0	4589.9	2797.8	2199.1	0	1294.1	10973	0	6111	0	0	0	0
ENDOD1	0	1010.15	2263.85	0	195.065	2142.65	0	0	0	0	0	0	0	42.8245	37.9855	0	0	0	0	37.0985	36.8415	59.072	62.1745	457.135	4040.35	1242.15	34.5105	3996.35	48.8585	1476.09	0	0	0	0	1453.25	1581.2	0	985.74	148.195	264.495	0	198.94	440.3	0	451.405	36.905	0	33.7325	0
EPB41L1	0	2983.5	2435	0	2732.35	2309	0	0	0	2022.35	0	2849.55	1581.05	546.505	365.66	400.9	228.22	356.135	0	3837.1	1182.45	0	6194.25	5890.8	916.655	512.055	275.64	1935.55	263.485	1722.4	0	0	0	0	3694.35	2095.3	0	6981.8	5639.5	2058.3	0	1143.47	2595.9	0	2207.65	0	1594.35	1153.14	0
EPCAM	0	4033	2184.85	443.69	8450.4	5828.6	4170.45	0	1424.7	6609.3	0	8182.05	0	0	0	178.46	932.04	423.935	0	6823.25	4575.6	0	7499.65	5903	2642.95	1226.25	593.935	9168.9	251.525	3288.35	0	0	0	0	12571.5	7168.75	0	11855.5	12647.5	8863.3	0	4584.05	4914.65	0	3600.05	0	0	0	0
EPHA2	0	2630.55	2324.25	0	3585.1	2097.1	0	0	0	984.64	0	1133.3	0	0	0	0	0	0	0	0	0	2760.9	0	480.82	5713.8	1406.6	0	8340.95	0	2564.2	0	0	0	0	4366.95	3065.7	1001.7	4320.65	1871.35	1724.65	0	1198.49	811.7	0	869.13	0	0	0	0
EPHX1	0	2882.8	1559.3	0	0	0	0	0	0	1696.12	0	2350.25	1286.7	353.285	509.56	1077.9	686.08	976.535	0	0	0	0	288.59	817.89	1878.95	2180.9	830.485	4355	0	1750.8	0	0	0	0	4646.3	3274.55	0	6655.4	5946.05	1577.75	0	1118.65	2260.55	0	1748.2	0	0	0	0
EPPK1	0	1460.1	2398.55	0	4436.1	2828.85	10229.9	0	4421.6	10200.8	0	11947	0	0	0	0	0	0	0	5576.7	2902.95	0	2604.2	1541.1	0	0	0	14466.7	284.67	3529.25	0	0	0	0	6601.3	5082.3	0	14796.5	13746.5	29956.5	0	16349	16155	0	8497.9	0	0	0	0
EPRS1	0	3012.7	2208.2	224.455	2644.95	2286.25	3464.1	0	758.265	5003.7	0	2576.6	639.65	418.685	288.27	824.15	817.245	947.75	0	4474.25	2628.85	0	11096	9041.25	493.965	541.725	453.085	386.2	286.745	269.67	0	0	0	0	5063.3	2440.5	273.88	5881.25	3731.15	6125.85	0	2709.55	9617.15	0	4459.3	236.5	296.335	877.995	214.33
ERGIC1	0	2555.75	2197.25	0	3265.25	1408.85	0	0	0	939.44	0	629.7	0	0	0	0	0	0	0	0	0	0	0	0	2756.1	1031.38	0	2376.7	0	475.09	0	0	0	0	5018.75	3395.25	0	4810.95	2141.45	0	0	0	0	0	0	0	0	0	0
ESD	0	878.265	681.725	505.205	613	525.635	8782.95	0	3911.95	3251.55	0	2432.1	0	0	0	497	306.745	214.34	0	5947.9	4627.9	0	19539	10414.1	0	0	0	1360.45	0	1090.9	0	0	0	0	638.9	380.59	0	2041.4	1904.35	6386.45	0	2023.3	7047.85	0	7895.6	500.535	0	3643.5	0
ETFA	0	1637.75	1531.06	5113.7	3069.7	3432.1	10052.4	739.545	5973.55	7762.65	0	3058	0	2145.85	703.09	252.4	3631.25	821.93	0	7443.95	5895.85	0	16553	13184.5	1300.63	1847.05	2023.1	6307.7	1756.65	3613.05	0	0	0	0	2480.45	3772.7	0	1726.45	4049.45	5992.45	1581.15	6328.85	11075.9	0	10096.4	3416.4	184.83	932.62	2358.05
ETFB	0	1987.8	1905.34	6982.95	3138	1664.7	2344.45	0	6889.2	977.57	0	925.195	869.995	2903.65	2133.5	4209.25	5693.45	5409	4190.1	1452.95	6368.6	2363.1	6944.75	3559	4497.8	4857.35	4120.15	4652.4	1944.35	4246.95	0	0	0	0	3021.55	1525.65	156.14	3224.05	4094.05	3124.2	2686.5	1993.5	5185.1	0	2618.75	5945.7	2406.15	4155.85	3908.05
EXOC7	0	1024.6	830.03	0	2461.1	1846	0	0	0	0	0	0	0	0	0	0	0	0	0	0	0	0	0	0	2845.3	1957.6	1326.1	2314.55	867.34	1772.2	0	0	0	0	2701.95	1304.1	0	3934.7	3194.55	0	0	0	0	0	0	0	0	0	0
EXOSC8	0	2228.05	905.5	0	841.28	996.21	0	0	0	0	0	0	0	0	0	0	0	0	0	0	0	0	897.995	568.13	0	0	0	0	0	0	0	0	0	0	904.3	936.395	0	0	0	0	0	0	0	0	0	0	0	0	0
FAM133B	0	979.02	6804.05	0	2232.95	2205.25	4824.15	0	1492.95	0	0	0	0	0	0	0	0	0	0	0	0	0	0	0	0	0	0	0	0	0	0	0	0	0	1832.35	1709.6	0	1887.9	626.125	2295.1	0	5783.3	2426.3	0	5668.8	0	0	0	0
FAM50A	0	801.705	1850.15	0	663.26	1663.9	0	0	0	0	0	0	0	0	0	1063.1	2387.8	1671.83	0	1378.7	927.935	0	3246.35	2801	0	0	0	0	1738.45	610.64	0	0	0	0	529.69	1913.9	0	0	0	1092.83	1265	1187.6	949.9	0	1300.4	1778.65	722.68	920.12	0
FANCD2	0	1765.85	830.985	0	1947.35	966.25	0	0	0	0	0	0	0	0	0	0	0	0	0	0	0	0	0	0	0	0	0	0	0	0	0	0	0	0	2355.15	1198.9	0	1849.5	1175	0	0	0	0	0	0	0	0	0	0
FBXO30	0	1186.51	773.44	957.27	605.295	990.945	0	0	0	474.965	0	574.95	0	6425.1	3334.2	0	3973.9	1650.4	0	0	0	0	1881.35	1037.82	0	2635.5	5137.5	0	7261.5	2258.6	0	0	0	0	634.165	396.105	541.08	771.27	480.98	1130.3	1622.8	2145.11	0	0	0	0	0	0	0
FKBP8	0	1284.95	856.785	0	1236.55	1050.92	0	0	0	0	0	0	0	0	0	0	0	0	0	0	0	0	0	0	0	0	0	1170	0	432.355	0	0	0	0	2933.15	1149.4	0	3045.15	2053.6	0	0	0	0	0	0	0	0	0	0
FLNC	0	108.855	1321.79	0	430.39	604.235	28432	0	10954.5	28049.5	0	44209	0	0	0	0	0	0	6578.9	20108	10764.5	9545.15	6003.3	6204.4	0	0	0	2783.9	0	1396	0	0	0	0	1756.15	1266.55	0	1643.65	2424.65	18892	0	17629.5	29469.5	341.435	31561.5	0	0	0	0
FNTA	0	3921.55	3594.55	0	9699.65	3052	0	0	0	0	0	0	0	0	0	0	0	0	0	0	0	0	0	0	0	0	0	0	0	0	0	0	0	0	2824	3164.9	0	3951.6	2211.7	0	0	0	0	0	0	0	0	0	0
G3BP2	0	10668	4720.4	1792.27	6502.45	4401.2	0	0	0	1748.65	0	2498.15	852.17	3159.65	2332.55	2178.7	410.97	1117.28	0	1259	668.925	642.51	2598.75	1710.3	1506.6	1540.15	1390.4	327.57	4914.9	1363.9	0	0	0	0	10581	6019.65	1201	9594.05	7196.25	1005.35	0	1934.35	2102.55	0	647.005	1630.75	578.585	1177.3	116.28
GALNT3	0	7369.2	6259.7	0	6183	5644.45	0	5968.05	4362.45	0	0	0	0	0	0	0	0	0	0	0	0	0	0	0	4833.9	0	4831.4	4712.55	4669.55	2190.45	0	0	0	0	8276.65	6112.4	0	5807.45	5984.75	0	0	0	0	0	0	0	0	0	0
GANAB	0	5036.3	2531.4	440.245	3721.5	4158.85	6542.6	0	2475.45	3743.05	0	2840.6	0	1946.3	259.965	503.25	2212.5	1107.45	0	12074.5	9255.25	0	29918.5	19698.5	1643	954.42	1265.47	1933	418.935	834.965	0	0	0	0	6637.85	6250.25	0	5675.6	6393.6	5767.65	0	5301.9	19815	0	10491	0	0	0	191.705
GAPDH	0	5344.95	3840	0	0	0	0	0	0	0	0	0	0	0	0	0	0	0	0	1938.25	979.32	0	6947.4	3852.15	0	0	0	0	0	0	0	0	0	0	0	0	0	0	0	0	0	0	2516.75	0	1313.3	0	0	0	0
GART	0	975.245	2566.45	0	534.51	1598	6339.2	0	890.46	664.805	0	678.51	456.32	842.11	355.155	285.73	405.905	552.43	0	10801	4110.5	0	24233	21804	509.215	396.28	634.07	222.265	373.68	273.135	0	0	0	571.55	997.935	2067.35	109.22	1153.3	1395.6	5996.9	0	4797.6	14045	0	10693.5	401.44	575.085	554.305	0
GBA	0	3617.1	3713.45	1885.85	2122.85	2818.75	0	0	0	0	0	0	0	0	0	0	0	0	0	0	0	0	0	0	2906.15	2045.3	1850.85	5119.8	1560.8	3659.6	0	0	0	0	1988.45	3090.05	0	0	0	0	0	0	0	0	0	0	0	0	0
GBF1	0	3878.25	1506.24	0	2743.1	1464.45	0	0	0	0	0	0	0	0	0	0	0	0	0	0	0	0	346.54	917.18	0	0	0	1039.4	0	421.16	0	0	0	0	3966.7	1798.85	0	4513.9	2575.15	343.73	0	1301.3	0	0	0	0	0	0	0
GET3	0	998.205	1456.85	0	2433.1	2414.8	0	0	0	0	0	0	0	0	0	0	0	0	0	0	0	0	2793.8	1524.9	0	0	0	3067.45	0	665.075	0	0	0	0	5920.05	3241.9	0	3869.8	4713.65	0	0	0	0	0	0	0	0	0	0
GFPT1	0	1334.28	604.05	177.41	751.05	1014.24	7422.6	0	3311.6	2369	0	3028.8	0	0	0	691.27	2032.9	1036.1	0	8794.35	5387.3	0	17059	20770	868.785	910.84	699.1	298.405	0	123.185	0	0	0	0	541.015	783.84	462.36	2098.5	1409.55	7867.3	0	7514.3	12553	0	10925	396.918	358.7	198.04	0
GHDC	0	2035.35	3114.95	0	1624	1202.94	0	0	0	0	0	0	0	0	0	0	0	0	0	0	0	0	0	0	0	0	0	0	0	0	0	0	0	0	1497.38	2064	436.68	1645.65	1322.64	0	0	0	0	0	0	0	0	0	0
GLB1	0	1979.15	1337.2	1585.55	792.73	1155	10316.1	0	2647.25	4316.75	0	4984.05	0	1898.25	444.555	0	4292.6	1024.37	0	4431.2	3611.3	0	15636	14056.5	734.51	1620.3	2273.35	5478.1	1142.7	2819.95	0	0	0	0	1582.55	1196	694.86	1165.65	3339.3	8335.25	0	4621.1	17342.5	0	12215.5	1550.28	0	581.935	0
GMPS	0	4782.7	2925.45	1655.2	6072.3	4480.3	0	0	0	5205	0	1703.45	0	0	0	0	0	0	0	2746.6	590.71	0	8038.95	6276.8	6169.45	3966.85	1787.8	0	0	0	0	0	0	0	7391.9	4888.3	0	8206.6	6278.55	6875.35	0	5657.45	9065.3	0	6023.95	0	0	0	0
GNAS	0	2730	1219.35	0	13603.5	6855.4	5496.55	683.49	4998.95	12889.5	0	5629	0	3071.4	2021.6	1410.4	985.84	1170	0	8765.7	12037	2333.4	11412	10664	7351.4	6410.9	2141.84	21643	694.365	8862.55	0	0	0	0	13659	8281.25	1272.4	29987	20342	7633.7	0	5949.1	5353.1	0	2663.65	0	0	0	0
GNPNAT1	0	4965.05	4979.8	2342.75	2187.8	6209.05	4289.15	0	1952.4	927.17	1283.5	1310.05	0	4528.95	1769.6	0	0	0	0	7240.85	4276.85	0	6778.15	8167.85	361.06	1579.2	3768.8	4255.4	7020.75	5643.45	0	0	0	0	1804.8	3871.6	4997.85	1230.63	3411.5	1414.7	1350	1463.45	3273.65	4421.05	3425.05	0	0	0	0
GOLPH3	0	2008.7	2692.5	458.35	2088.9	2401.25	0	0	0	0	0	0	0	0	0	0	0	0	0	0	0	0	2551.05	3420.65	3918.6	2178.6	1053.14	0	0	0	0	0	0	0	2238.2	4959.3	0	0	0	1638.55	0	3423.9	1615.65	0	5698.75	0	0	0	0
GRB7	0	1583.15	831.325	0	828.615	1118.7	0	0	0	0	0	0	0	0	0	0	0	0	0	0	0	0	0	0	0	0	0	0	0	0	0	0	0	0	824.885	989.48	0	588.29	1531.87	0	0	0	0	0	0	0	0	0	0
GSPT1	0	2343.35	614.285	1470.45	2479.65	2234.5	2338.75	0	496.75	2238.55	0	1795.45	195.65	1881.3	655.06	414.715	1381.65	905.435	0	11906	9071.05	0	18720	20858.5	0	318.895	1227.8	35.095	1204.22	818.845	0	0	0	0	3123	2025.7	0	2051.2	2025.5	7289.45	134.6	1522	9606.55	0	6461.25	1292.07	311.305	1588.16	1260.75
GSTO1	0	1548.2	1229.71	1054.51	1518.85	2464.05	14283.5	0	7883.7	2769.35	0	3626.7	0	1418.8	427.96	140.795	2433.1	757.135	0	13626.5	9064.85	0	22975.5	24487.5	0	0	0	3398.65	285.945	2706.45	0	0	0	0	2293.45	2951.6	0	3712.65	5403.6	10092.5	0	9598.55	16451.5	663.56	15958	0	0	0	0
GTF2B	0	3783.4	4890.8	998.865	4367.7	4692.45	0	0	0	0	0	0	2928.1	3948.05	4303.85	3856.15	5208.55	4537.65	0	0	0	0	0	0	5369.15	3046.05	3507.45	1235.85	2904.85	2433.6	0	0	0	0	2710.05	8006.15	2823.9	1775.7	2232.25	0	0	0	0	0	0	1843.45	3530.9	2957.15	0
GTF2F1	0	1340.25	480.955	3689.7	2236.8	2987.15	0	0	0	641.67	0	457.225	1691.1	1832.4	1511.2	1702.5	1434	1406.56	0	3112.85	2567.1	3320.8	1074.45	884.38	0	0	0	1540.6	1538.2	1094.29	0	0	0	2776.3	3557.1	2579.8	2023.2	1158.35	2317.9	0	0	0	0	0	0	0	0	0	0
GTF2I	0	2368.2	1659.85	3321.95	1863.5	2432.75	0	0	0	0	0	0	0	0	0	0	0	0	0	0	0	0	1615.15	864.37	3266.6	781.945	1259.83	2141.9	175.4	2090.6	0	0	0	2412.1	2627.25	1454.45	6271.75	1601.35	2949.7	0	0	0	0	0	0	0	0	0	0
GTPBP4	0	7673.25	4958.55	0	5244.7	4888.5	472.035	0	118.461	161.975	737.54	617.875	0	0	0	0	0	0	1538.8	116.022	298.445	4180.3	522.685	896.545	5647.35	985.925	0	6792.8	0	1892.9	0	0	0	574.94	3198.6	2347.7	0	1138.58	2051.6	1138.59	0	235.365	1315.4	0	329.08	0	0	0	0
HABP4	0	2440.1	942.84	0	2659.4	1198.56	0	0	0	0	0	0	0	0	0	0	0	0	0	0	0	0	0	0	0	0	0	0	0	0	0	0	0	0	1405.1	605.345	0	2299.1	1316.59	0	0	0	0	0	0	0	0	0	0
HACD2	0	6902.2	5579.4	0	6947.95	4544	0	0	0	0	0	0	0	0	0	0	0	0	0	0	0	0	0	0	0	0	0	0	0	0	0	0	0	0	7854.1	5663.05	0	6092.95	4477.7	0	0	0	0	0	0	0	0	0	0
HACL1	0	307.34	700.725	0	0	0	0	0	0	0	0	0	0	0	0	0	0	0	0	3873.3	988.93	0	2502.7	3286.85	0	0	0	0	0	0	0	0	0	0	0	0	0	0	0	0	0	0	0	0	0	0	0	0	0
HARS1	0	4216.2	4387.5	0	5502.1	3567.6	5523.8	0	3327.9	1370.05	0	1355.9	648.13	1518.85	1587.15	2076.1	1619.8	2175.4	0	6103.45	2884.15	0	7178.75	8524.3	3202.95	1755.45	940.645	2196.4	1358.21	1139.23	0	0	0	0	5633.75	2856.2	2054.3	2966.1	3695.5	3169.5	0	2328.75	5779.4	0	3345.9	2312.45	2559.9	1174.2	0
HBS1L	0	888.1	752.115	0	0	0	0	0	0	0	0	0	0	0	0	0	0	0	0	0	0	0	0	0	0	0	0	0	0	0	0	0	0	0	0	0	0	0	0	0	0	0	620.875	0	358.88	0	0	0	0
HCLS1	0	223.865	300.985	0	0	0	0	0	0	0	0	0	0	0	0	0	0	0	0	0	0	0	0	0	0	0	0	0	0	0	0	0	0	0	0	0	0	0	0	0	0	0	0	0	0	0	0	0	0
HDGF	0	2041.5	1440.2	694.57	1826.05	3190.4	6156.45	2801.8	5691.7	2440.7	0	2577.3	0	663.045	1036.85	798.18	5897.05	1923.65	0	11739.5	10538	0	20821.5	13013	0	973.35	2701.9	53373.5	1117.15	24534.5	0	0	0	0	1985.5	3568.65	0	3413.3	4860.7	2602.45	0	4666.95	10222.6	0	7960.15	680.15	1901.4	1440.11	1069.4
HEXB	0	1072	2855.3	0	2511	1546.1	740.16	0	329.945	9454.7	0	6083.7	0	0	0	492.11	1767.84	604.26	0	3189.45	1843.76	0	9532.45	5120	961.98	1362.35	2133.85	2605	983.995	2473.75	0	0	0	0	2657.85	768.29	0	4707.1	3878.75	3585.65	0	909.965	5892.9	0	1682.85	0	0	0	2487.15
HIBCH	0	3574.25	2297.15	0	3652.05	2549.05	4093.45	0	1155	4333.95	0	3978.15	0	0	0	0	0	0	0	1527.15	909.03	0	4780.1	2890.95	0	0	0	0	0	0	0	0	0	0	3898.6	3325.45	0	4473.5	2940.3	2956.5	0	1628.6	4185.75	1376	2676.6	0	0	0	0
HK2	0	1862.25	590.085	0	2090.25	983.865	0	0	0	0	0	0	0	0	0	0	0	0	0	0	0	0	688.815	731.23	0	0	0	0	0	0	0	0	0	0	4219.2	1167.85	0	8318.25	2180.5	762.4	0	633.16	3410	0	1153.09	0	0	0	0
HLA-A	0	867.205	556.77	0	2600.65	1819.65	0	0	0	902.71	0	920.36	0	0	0	0	0	0	0	2412.9	496.7	0	2874.4	1974.7	0	0	0	2872	0	969.325	0	0	0	0	3314.1	2952.75	0	1914.05	3927.4	2620.8	0	1018.84	1801.2	0	885.615	0	0	0	0
HM13	0	1498.17	3532.45	0	1831.9	2058.6	0	0	0	0	0	0	0	0	0	0	0	0	622.84	359.43	466.48	3599	0	457.645	4620.35	2496.8	0	10403.5	446.04	7375.75	0	0	0	0	5236.95	4601.55	0	3085.05	1833.25	92.356	0	1136.65	353.735	0	1599.25	0	0	0	0
HMCES	0	18740	38871.5	0	0	0	0	0	0	0	0	0	0	8543.6	7158.45	0	0	0	0	0	0	0	0	0	0	0	0	3681.6	10506.5	10589	0	0	0	0	0	0	0	0	0	0	0	0	0	0	0	0	0	0	0
HNRNPH2	0	1131.15	971.99	0	1363.55	1040.19	0	0	0	0	0	0	0	0	0	0	0	0	0	0	0	0	518.355	915.08	0	0	0	428.53	681.76	1200.77	0	0	0	0	1194.1	837.695	0	1033.85	1086.6	0	0	0	0	0	0	0	0	0	0
HNRNPUL1	0	4909.95	3831.9	0	5190.75	3155.85	0	0	0	1862.9	0	1700.35	0	0	0	0	0	0	0	0	0	0	4119	2326.1	2452.3	1851.05	474.91	2485.2	1632.4	2325.9	0	0	0	0	3944.3	1721.88	477.89	6276.05	4654.4	1156.55	0	649.16	0	0	0	529	1554.1	669.03	0
HP1BP3	0	2150.9	492.3	0	904.97	510.885	0	0	0	0	0	0	0	0	0	0	0	0	0	0	0	0	0	0	0	0	0	0	0	0	0	0	0	0	1814.1	582.085	0	839.22	687.84	0	0	0	0	0	0	0	0	0	0
HSD17B2	0	1613.29	2774.75	0	2800.3	901.55	0	0	0	0	0	0	0	0	0	0	0	0	0	0	0	0	0	0	0	0	0	0	0	0	0	0	0	0	3337.75	1604.5	0	3471.8	1568.05	0	0	0	0	0	0	0	0	0	0
IBA57	0	19314.5	6350.8	0	24327.5	11399	0	0	0	0	0	0	0	0	0	0	1431.95	2214.7	0	0	0	0	0	0	0	0	0	0	0	0	0	0	0	0	22129.5	19372.5	0	0	0	0	0	0	0	0	0	2062.1	6107.85	2046.7	0
ICAM1	0	1096.35	651.935	0	0	0	0	0	0	0	0	0	0	0	0	0	0	0	0	0	0	0	0	0	0	0	0	0	0	0	0	0	0	0	0	0	0	0	0	0	0	0	0	0	0	0	0	0	0
IDH1	0	911.8	549.855	1264.85	2427.5	1840.7	14454.5	0	6002.45	8673.65	0	5047.15	0	863.68	294.695	358.23	2876.4	795.535	0	14602.5	8588.35	0	20620	19373	0	243.025	456.77	702.505	59.297	295.14	0	0	0	0	3146.85	1757.5	0	10095.6	7745.85	10748	0	6842.4	16526	0	14357	1653.95	42.594	837.835	0
IDH3B	0	2430	2836.15	0	4352.5	1752.85	0	0	0	959.425	0	2454.7	0	833.16	886.895	1175.2	345.43	617.15	0	785.215	626.775	0	1363.4	908.5	2702.75	1874.7	1183	3061.75	1348.2	2293.45	0	0	0	0	4772.5	4190.55	1052.83	2417.65	4069.7	1426.7	0	2247.25	2028.65	0	2881.2	0	0	0	0
IGBP1	0	1033.75	491.91	0	0	0	0	0	0	1342.76	0	744.31	0	0	0	0	3271.9	1294.5	0	0	0	0	2429.45	1388.77	1237.9	2989.6	1088.05	0	0	0	0	0	0	0	997.98	376.555	0	1577.85	958.955	0	0	0	0	0	0	0	0	0	0
ILVBL	0	4394.3	1846.7	0	3470.45	2238.95	0	0	0	0	0	0	0	0	0	0	0	0	0	0	0	0	0	0	0	0	0	4177.3	0	1873.05	0	0	0	0	5451.65	3689.2	0	4512.1	3551.95	656.735	0	541.005	0	0	0	0	0	0	0
ISCU	0	2795.35	1935.1	0	1863.4	1182.55	0	0	0	0	0	0	0	2856.8	1098	0	0	0	0	0	0	0	0	0	0	0	0	0	0	0	0	0	0	0	0	0	0	0	0	0	0	0	0	0	0	0	0	0	0
IST1	0	2382.05	1035.88	0	4781	2375.1	3301.5	0	1616.45	3250.65	0	2144.15	0	0	0	0	0	0	0	1609.7	1132.42	0	2633.2	2294.5	0	0	0	4677.05	763.635	1925.95	0	0	0	0	5023.45	2256.05	0	7665.25	4749.8	2723.5	0	2032.15	2723.8	0	1975.95	0	0	0	0
ITGA2	0	5092.75	7556.05	0	12887.5	11812	0	0	0	0	0	0	0	0	0	0	0	0	0	0	0	0	0	0	0	0	0	3804.55	6558	6992.35	0	0	0	0	0	0	0	0	0	0	0	0	0	0	0	0	0	0	0
JAGN1	0	1221.65	504.51	0	1527.4	561.49	0	0	0	0	0	0	0	0	0	0	0	0	0	0	0	0	0	0	0	0	0	1194.05	0	1307.23	0	0	0	0	2349.9	835.465	0	3167.2	1178.01	0	0	0	0	0	0	0	0	0	0
JAK1	0	2664.1	2773.95	2565.5	2358.45	2906.75	1185.5	1729.75	4095.15	0	0	0	3248.05	2995.8	1536.29	1562.2	2989.6	2836.65	0	0	0	0	1852.45	1647.95	0	2665.7	3657.05	2849.1	3661.75	2778.7	0	0	0	0	2425.5	2572.05	3503.5	1527.1	2401.65	0	3821.05	2783	905.9	3665	3184	2728.5	2989.85	2828.65	2547.55
JPT2	0	171.375	328.69	0	1164.25	508.79	0	0	0	2430.1	0	1031.33	0	0	0	0	0	0	0	0	0	0	167.98	1538.8	0	0	0	8428.35	724.71	4486	0	0	0	0	0	0	0	0	0	0	0	0	0	0	0	0	0	0	0
KDELR1	0	3522.7	637.9	0	1494.96	3104.1	0	0	0	4360.55	0	74.0925	0	0	0	0	0	0	0	519.155	328.385	0	0	0	0	0	0	1896.55	0	915.94	0	0	0	0	6730.9	3173.7	1628.4	11547.5	2698.7	0	0	0	0	0	0	0	0	0	0
KDM1A	0	1710.2	1238.49	0	6208.85	4935	0	0	0	1216.25	0	791.485	1895.3	1537.65	753.64	1889.6	1198.85	2633.55	0	0	0	0	0	0	0	1992.15	2192.1	1542.4	5458.15	1380.45	0	0	0	0	6556.15	3183.25	2789.3	7734.8	6491.9	0	0	0	0	0	0	2036.18	555.495	1813.95	441.45
KIN	0	2595.45	1808.9	0	944.13	1257.05	0	0	0	0	0	0	0	529.395	635.165	0	0	0	0	0	0	0	0	0	0	0	0	141.57	745.41	464.975	0	0	0	0	2123.85	2125.95	0	0	0	0	0	0	0	0	0	0	0	0	0
KPNA1	0	11454.4	8262.95	0	9276.7	5248.35	0	0	0	1011.89	0	608.53	0	0	0	0	0	0	0	0	0	311.02	1039.09	412.065	3141.45	581.495	135.45	2778.4	278.4	1407.9	0	0	0	0	6061.25	5490.4	821.24	2879.15	2153.45	0	0	0	0	0	0	0	0	0	0
KPNA4	0	1349.68	1173.35	0	0	0	0	0	0	2268.35	0	1247.69	0	0	0	0	0	0	0	0	0	0	654.82	1363.85	744.85	473.23	805.545	1085.35	591.955	904.875	0	0	0	0	2785	1470.8	0	3182.55	1660.8	0	0	0	1346.75	0	1266.25	0	0	0	0
KPNA6	0	8614.8	7253.7	523.91	8514.95	7177.7	1333.64	0	553.13	1118.7	0	1093.75	0	612.81	510.99	261.3	989.905	387.63	0	0	0	0	1303.79	1437	4534.8	2121.55	606.42	4364.35	770.095	2691.65	0	0	0	0	6357.2	5624.2	822.7	3449.8	3960.85	2373.2	0	1510.75	2341.7	0	1783.95	0	0	0	0
LARP4B	0	2396.95	2098	0	3359	2262.7	0	0	0	828.04	0	1827.4	0	0	0	562.495	834.34	0	0	0	0	0	0	0	1177.7	840.39	950.32	1804.3	1811.15	2022.4	0	0	0	0	2071.25	1516.45	407.53	138.31	1603.65	1614.05	0	1365.35	0	0	0	1050.6	583.205	530.2	0
LASP1	0	1016.29	562.195	107.28	419.485	324.815	11508.8	0	8215.55	38208.5	0	20916.5	759.29	1438.9	1036.71	7.9625	2168.9	1015.25	0	61597	49993.5	0	19836	33791	2052.7	1466.45	1548.55	17797.5	1130.35	4089.85	0	0	0	0	591.3	443.755	0	1835.25	1220.05	2317.55	0	7013.6	25272.5	1567	27199	415.235	565.595	261.76	0
LCLAT1	0	267.255	441.72	0	321.18	225.845	0	0	0	0	0	0	0	0	0	0	0	0	0	0	0	0	0	0	0	0	0	3752.55	0	445.485	0	0	0	0	211.615	542.335	0	181.825	193.775	0	0	0	281.13	0	131.987	0	0	0	0
LMF2	0	41860	16140	0	0	0	0	0	0	0	0	0	0	0	0	0	0	0	0	0	0	0	0	0	0	0	0	0	0	0	0	0	0	0	34172.5	28138	22713	50513.5	27285	0	0	0	0	0	0	0	0	0	0
LNPK	0	2663	2151.15	0	4581.3	2669.3	0	0	0	0	0	0	0	0	0	0	0	0	0	0	0	0	0	0	0	0	0	0	0	0	0	0	0	0	2347.45	3085.85	0	0	0	0	0	0	0	0	0	0	0	0	0
LPCAT2	0	2150.65	1181.1	0	1322.82	1406.05	0	0	0	0	0	0	0	0	0	0	0	0	0	0	0	0	0	0	0	0	0	0	0	0	0	0	0	0	3692.75	2289.9	0	0	0	0	0	0	0	0	0	0	0	0	0
LPCAT3	0	1190.3	1905	0	1341.65	866.12	0	0	0	0	0	0	0	0	0	0	0	0	0	0	0	6343.2	0	338.61	0	0	0	7000.05	0	2566.4	0	0	0	0	2972.15	1158.95	613.61	1857.15	1324.95	0	0	0	0	0	0	0	0	0	0
LRCH1	0	1374.75	745.63	0	0	0	6757.5	0	3397.35	10846	0	3494.8	0	0	0	0	0	0	0	750.755	1211.4	0	334.47	1413.21	0	0	0	0	0	0	0	0	0	0	0	0	0	0	0	3664.95	0	1625.9	0	0	0	0	0	0	0
LRRFIP1	0	1264	826.865	0	660.95	923.615	0	0	0	0	0	0	713.045	942.575	878.22	1590.45	1318.15	1132.4	0	0	0	0	4223.15	1997	0	0	0	0	0	0	0	0	0	0	0	0	0	915.91	606.23	0	0	0	0	0	0	0	0	0	828.155
LSM1	0	5937.45	2769.15	0	1574.85	2099.5	0	0	0	0	0	0	0	0	0	0	0	0	0	0	0	0	2171.75	1005.48	2799.1	2359.1	1738.05	2313.35	2175.25	1770.13	0	0	0	0	0	0	0	1806	2416.65	0	0	0	0	0	0	0	0	0	0
LSM5	0	974.115	1405.3	0	2480.45	1445.1	0	0	0	0	0	0	2859.45	1241.2	1548.05	162.09	1866.2	538.85	0	0	0	0	1765.35	1897.25	1165.65	1002.9	1917.5	1732.55	2273.15	1967	0	3919.1	912.7	0	0	0	0	0	0	0	0	0	0	0	0	558.23	3207.1	2387.65	556.56
LTV1	0	1708.65	2065.5	0	2686.65	920.285	0	0	0	0	0	0	0	0	0	2309.1	0	943.955	0	0	0	1121.9	203.55	318.78	2281.15	537.81	234.57	1554.2	409.495	1273.35	0	0	0	0	622.88	587.695	0	855.23	597.415	616.785	0	833.21	505.2	0	741.815	0	0	0	0
LUC7L	0	10014.9	7321.1	0	8078.2	5150.3	0	0	0	0	0	0	3746.8	0	1030.25	0	0	0	0	0	0	0	2536.55	477.32	2959.5	1315.7	665.38	1821.7	922.7	1325.75	0	0	0	0	8077.6	6411.3	2641.25	9891.8	9942.9	3644.3	0	2546.35	0	0	0	0	0	0	0
LUC7L3	0	2295.1	4279.75	0	0	0	0	0	0	0	0	0	5116	2461.65	3703.6	3467.4	1526.94	2757.4	0	0	0	0	2463.9	737.475	4805	4508.95	3308.75	2341.2	3645.5	2808.8	0	4447.75	3510.7	0	2532.15	1053.19	0	0	0	0	0	0	1055.8	2062.6	967.71	2594.8	4154.4	3550.05	1286.1
LYAR	0	2765.85	1496.1	0	2467.85	1723.1	0	0	0	0	0	0	0	0	0	0	0	0	0	0	0	0	0	0	0	0	0	0	0	0	0	0	0	0	2022.45	889.835	0	1159.17	824.97	0	0	0	0	0	0	0	0	0	0
MAGED2	0	4095.1	3208.35	0	4957.2	1204.44	0	0	0	0	0	0	0	0	0	0	0	0	0	0	0	0	0	0	0	0	0	0	0	0	0	0	0	0	4351.35	2571	0	3994.45	3521.3	0	0	0	0	0	0	0	0	0	0
MAGT1	0	1261.25	833.665	0	1257.4	999.275	0	0	0	0	0	0	0	0	0	0	0	0	0	0	0	0	0	0	0	0	0	792.75	0	294.89	0	0	0	0	0	0	0	0	0	0	0	0	0	0	0	0	0	0	0
MAPK1	0	3764.1	863.95	1278.56	4729.2	4276.35	4512.6	0	1927.6	6745.55	0	6079.55	1627.9	1009.3	574.775	1664.2	1409.19	1652.08	0	5489.4	2099.9	0	10900	7354.9	3532.65	2004.98	2182.4	1257.25	517.5	759.205	0	0	0	0	7067.75	3788.15	1599.6	7003.25	5900.7	7201	0	3515	9389.9	0	5250.5	1653.16	1652.1	908.64	0
MAPK13	0	2788.5	1377.55	0	3607.15	1537.4	0	0	0	0	0	0	0	0	0	0	0	0	0	0	0	0	0	0	0	0	0	0	0	0	0	0	0	0	3571.35	1475.6	0	2011.65	1858.8	0	0	0	0	0	0	0	0	0	0
MARCKS	0	1832	1189.15	1101.2	2314.85	942.745	0	0	0	1495.65	0	4408.15	0	0	0	0	721.135	1433.5	0	1138	625.715	0	5259.35	3288.25	2880.45	2150.8	1310.6	6595.55	0	1141.25	0	0	0	0	2063.05	1060.15	1304.5	19002	13004	0	0	0	1133.5	0	495.075	0	0	0	0
MAT2A	0	213.05	809.405	1395.1	628.305	229.7	2958.9	0	2356.6	3914.15	0	2096.35	0	0	0	346.39	1887.89	534.96	0	4812.45	5321.7	0	8745.65	5230.35	512.79	617.07	263.105	404.23	714.14	465.43	0	0	0	0	1702.15	424.595	0	4771	1669.88	1189.35	111.89	951.185	4489.4	1025.6	5865.05	993.26	282.15	878.1	0
MBOAT7	0	1473.69	1280.94	0	2084.3	1102.31	0	0	0	0	0	0	0	0	0	0	0	0	0	0	0	0	0	0	2920.2	1070.68	0	0	0	0	0	0	0	0	2853.15	2666.95	0	1250.12	1315.35	0	0	0	0	0	0	0	0	0	0
MCU	0	2343.65	1254.41	0	4109.3	2291.8	0	0	0	3332.85	0	1973.1	0	0	0	0	0	0	0	0	0	0	0	0	0	0	0	11130	0	3622	0	0	0	0	9531.75	5035.65	0	12768.5	7404	0	0	0	0	0	0	0	0	0	0
MDH1	0	3280.15	2473.35	5505.3	5118.8	6211.3	24062.5	0	14590	5864.9	287.26	4534.75	0	4084.35	1554.4	453.75	8331.5	2965.95	0	27420.5	21222	0	38123.5	39005	768.835	2002.55	2832.2	1989.6	1278.7	1999.45	0	0	0	0	5764.85	6145.55	35.661	8333.4	9904.75	20584.5	2178.15	16821.5	34162	0	28603	6745.5	0	732.775	3455.55
MDK	0	2517.85	1679.2	0	0	0	0	0	0	0	0	0	0	0	0	0	0	0	0	0	0	0	0	0	0	0	0	0	0	0	0	0	0	0	743.58	729.93	0	118.385	353.19	0	0	0	0	0	0	0	0	0	0
MEST	0	851.46	2286.35	411.96	729.39	1966.4	0	0	0	0	0	0	0	0	0	0	0	0	0	0	0	0	0	0	0	0	0	851.29	0	490.055	0	0	0	0	552.705	1960.6	0	0	0	0	0	0	0	0	0	0	0	0	0
METTL7B	0	6767.65	5111.15	0	6260.5	4111.55	0	0	0	0	0	0	0	0	0	0	0	0	0	0	0	0	0	0	0	0	0	0	0	0	0	0	0	0	5918.7	4124.75	0	2439.6	2856.75	0	0	0	0	0	0	0	0	0	0
MGST1	0	1545.65	4370.4	0	402.188	2628.85	0	0	0	0	0	0	0	0	0	0	0	0	0	0	0	0	0	0	4326.75	802.06	0	9391.3	0	4518.45	0	0	0	0	2841.35	3584	0	665.545	1072.25	0	0	0	0	0	0	0	0	0	0
MGST2	0	960.655	12404.5	0	0	0	0	0	0	0	0	0	0	0	0	0	0	0	0	0	0	0	0	0	4769.75	1095.96	0	13709.5	0	5674.75	0	0	0	0	0	0	0	0	0	0	0	0	0	0	0	0	0	0	0
MIF	0	1555.05	2046.95	3758.85	3886.75	5540.5	14456	0	6268.6	1394.25	0	6094.4	0	3443.35	1362.8	1385.2	8172.85	2256.25	0	21539.5	13964	0	34235.5	27826.5	0	1259.15	3387.6	4557.6	845.58	2037.75	0	0	0	0	2601.8	4492.85	0	1618.05	11143.1	11586	0	8438.95	16625	0	12520.5	0	0	0	0
MLST8	0	7721.7	7687	0	0	0	0	0	0	0	0	0	0	0	0	0	0	0	0	0	0	0	0	0	0	0	0	1592.95	0	1517.45	0	0	0	0	3530.9	6140.75	1749.6	6323.1	5168.2	0	0	0	0	0	0	0	0	0	0
MLYCD	0	6347.9	5176.7	0	3344.6	4305.2	0	0	0	0	0	0	0	0	0	0	0	0	243	6168.8	4786.5	0	0	0	10074.5	2503.15	0	8037.8	0	3881.5	0	0	0	0	4718.25	5238.8	0	1815.75	3715.5	2026.85	0	2241.5	0	0	0	0	0	0	0
MMS19	0	1849.65	1590.92	0	2680.15	1297.15	4222.75	0	2436.8	1843.3	1597.7	1592.98	0	0	0	0	0	0	0	0	0	0	8037.8	3459.35	0	0	0	0	0	0	0	0	0	0	5253.9	1960.45	0	7562.4	2238.85	0	0	0	0	0	0	0	0	0	0
MRPS27	0	1078.88	779.255	0	2813.9	2053.75	0	0	0	0	0	0	1686.4	1210.65	966.23	0	0	0	0	0	0	0	0	0	0	0	0	5876.95	1824.8	3849.25	0	0	0	0	1776.15	438.985	0	14885.5	10364.5	0	0	0	0	0	0	0	4627.5	3079.65	0
MRTO4	0	3421.9	1230.65	0	3333.85	1643.45	0	0	0	965.56	0	2443.45	0	0	0	0	0	0	0	2075.05	1029.97	0	1409.53	1215.15	0	0	0	1121.16	111.74	476.42	0	0	0	0	2940.25	764.94	0	1883	2191.35	0	0	0	1132.1	0	744.815	0	0	0	0
MSMO1	0	5705.1	4808.95	0	6070.9	5085.55	0	0	0	0	0	0	0	0	0	0	0	0	0	0	0	0	0	0	4832.95	2150.45	0	6780.35	0	3559.65	0	0	0	0	5621.85	5790.8	0	0	0	982.785	0	489.765	0	0	0	0	0	0	0
MTPN	0	1301.1	625.03	0	1434.95	911.56	0	0	0	4883.4	0	1724.45	0	0	0	0	0	0	0	5853.1	2378.1	0	19066.5	11237.5	0	0	0	1931.5	0	1397.61	0	0	0	0	1256.45	677.605	0	5700.25	5274.25	0	0	0	7710.75	0	3918.35	0	0	0	0
MTREX	0	673.865	1005.93	0	886.13	1094.65	0	0	0	0	0	0	0	0	0	894.145	83.507	589.26	0	0	0	0	3957.8	1090.4	1674.05	1102	1133.3	1633.15	1807.76	1575	0	0	0	0	1619.15	711.51	943.275	3724.2	2619.85	0	0	0	0	0	0	216.15	983.62	604.755	0
MYADM	0	6819.15	1690.95	0	8614.55	5244	0	0	0	0	0	0	0	0	0	0	0	0	0	0	0	0	0	0	3561.75	832.805	0	4227.4	0	1033.34	0	0	0	0	10965.5	6263	0	0	0	2906.45	0	1193.45	0	0	0	0	0	0	0
MYBBP1A	0	1375.6	530.84	0	1270.6	1090.22	0	0	0	0	0	0	0	0	0	0	0	0	0	0	0	0	0	0	0	0	0	0	0	0	0	0	0	0	0	0	0	0	0	0	0	0	0	0	0	0	0	0	0
MYCBP	0	1443.5	2665	0	0	0	0	0	0	0	0	0	4627.2	2946.2	3724.6	0	2921.6	1626	0	0	0	0	1079.75	1785	4765.85	4161	3475.8	1786.7	2772.25	2739.7	0	5502.9	1610.74	0	0	0	0	0	0	0	0	0	0	0	0	503.69	3613.9	1058.54	0
MYCBPAP	0	72344	12818.9	0	87522	97080	0	0	0	0	0	0	0	0	0	0	0	0	0	0	0	0	0	0	0	0	0	13101	0	3172.14	0	0	0	0	52199	43759	0	9961.85	68557	0	0	0	0	0	0	0	0	0	0
MYO1B	0	4257.35	1620.55	0	11551.5	6279.2	0	0	0	10191.8	0	5372.65	0	0	0	0	0	0	0	4173	2728.05	1633.8	5878.1	4313.05	2972	1114.39	236.71	13075.5	212.24	4937.85	0	0	0	0	10513.5	5963.3	300.78	19169.5	15455	12438	0	5189.55	3993.9	0	2358.4	0	0	0	0
NAA15	0	812.175	764.165	0	1252.15	1239.3	2024.2	0	1565.96	2947.2	0	2660.9	0	844.31	618.46	0	0	0	0	1157.58	1788.4	0	4350.6	1967.05	598.46	639.585	1432.98	1617.4	590.12	1126.35	0	0	0	0	1397.3	862.38	0	4103.9	1911.1	4433.6	0	1727.35	2848.35	0	2494.7	0	0	0	0
NAA50	0	1162.55	1214.6	547.98	2070.3	2085.2	0	0	0	0	0	0	0	0	0	0	0	0	0	528.65	389.64	0	1150.07	1096.26	0	0	0	800.545	357.75	595.55	0	0	0	0	843.3	1000.28	0	731.47	1497.8	1697.7	0	1081.25	0	0	0	0	0	0	0
NAALAD2	0	6917.5	11267.6	0	0	0	0	0	0	0	0	0	0	0	0	0	0	0	0	0	0	0	0	0	21404	4024.75	0	5641	0	2136.45	0	0	0	26759.5	5021.15	19834	5128.5	2908	4620.75	0	0	0	0	0	0	0	0	0	0
NACA4P	0	917.28	851.345	0	712	1033.09	0	0	0	0	0	0	0	0	0	0	0	0	0	0	0	0	0	0	0	0	0	0	0	0	0	0	0	0	0	0	0	0	0	0	0	0	0	0	0	0	0	0	0
NARS1	0	10765.5	8255.55	0	4343.9	5795.2	6167.6	0	1170.34	2129.05	0	4760.55	0	0	0	738.75	367.28	393.611	0	5255.9	3726.7	0	9229.35	10669.5	0	0	0	1200.35	0	701.135	0	0	0	0	4187.45	6258.25	0	0	0	9927.9	0	4540.15	9938.7	0	7450.15	0	0	0	0
NARS2	0	3643.55	1385.35	0	3173.35	1725.35	0	0	0	1988.88	0	1838.45	0	0	0	0	0	0	0	0	0	0	0	0	0	1748.7	2909.6	0	0	0	0	0	0	0	2440.2	929.605	0	2714.4	1434.45	0	0	0	11545	0	6171.35	0	0	0	0
NCBP2AS2	0	4786.5	961.345	0	1893	1330.1	0	0	0	0	0	0	0	0	0	0	0	0	0	0	0	0	0	0	0	0	0	0	0	0	0	0	0	0	5080	2460.95	823.2	4570.85	2207.7	0	0	0	0	0	0	0	0	0	0
NCKAP1	0	829.945	1378.9	769.38	612.75	1738.95	0	0	0	1820.3	0	386.37	0	0	0	0	0	0	0	1426.55	979.295	0	2165.85	2138	1253	1540.15	1337.5	1051.2	1140.05	1120.92	0	0	0	0	506.075	1875.95	2486.9	1637	1082.62	1181.65	0	1894.65	1320.76	0	1171.2	0	0	0	0
NEDD8	0	2520.85	703.09	0	3006.9	1622.8	0	0	0	6776.2	0	3141.75	0	0	0	0	2431.7	1047.78	0	1831.05	1424.15	0	8673.7	4434.55	649.355	0	599.14	1634.65	678.32	1044.42	0	0	0	0	3386.8	1183.28	0	9768.05	5900.6	1838.75	0	667.075	4115.6	0	2201.8	0	0	0	0
NELFE	0	4476.45	3138.1	0	4457.15	3133.55	0	0	0	0	0	0	0	886.18	1310.85	961.805	915.735	1155.58	0	1368.35	791.16	0	2837.1	1753.35	838.31	1062.3	1171.65	3562.05	1392.15	2858.9	0	0	0	0	5427.65	3732.7	1260.4	3535.6	4141.45	0	0	0	0	0	0	0	0	0	0
NFS1	0	2037.55	1758.25	0	3112.5	2354.35	0	0	0	2793.1	0	2316.9	937.38	3558.9	2024	1723.3	0	678.56	0	0	0	0	1346.15	707.01	0	0	0	0	1970.7	1273.15	0	0	0	0	3159.4	2156.8	1560	4809.35	3142.3	0	0	0	1710.8	0	980.77	1116.36	2246.9	1595.8	631.805
NHP2	0	3085.45	2631.2	0	0	0	0	0	0	0	0	0	0	0	0	0	0	0	0	0	0	0	0	0	0	0	0	0	0	0	0	0	0	0	2452.1	2239.6	0	0	0	0	0	0	0	0	0	0	1990.25	1785.6	0
NIP7	0	2472	1299.6	0	2257.95	906.405	0	0	0	0	0	0	0	0	0	0	0	0	0	0	0	0	0	0	1070.2	806.13	879.82	909.535	1817.6	1446.2	0	0	0	0	1933	1333.65	0	998.865	1060.7	0	0	0	0	0	0	0	0	0	0
NLRP2	0	4862.25	4638.4	0	948.62	1999	0	0	0	0	0	0	0	0	0	0	0	0	0	0	0	0	6350.85	3942.1	0	0	0	2654.7	2538.9	2705.3	0	0	0	0	3095.55	2500.2	0	1722.85	2660.35	0	0	0	5200.3	0	3628.35	0	0	0	0
NOC2L	0	1634.45	3455	0	396.99	1668.45	0	0	0	0	0	0	0	0	0	0	0	0	0	0	0	1221.35	1063.45	372.71	8052.6	2169.75	0	6318	0	2868.55	0	0	0	0	712.295	3334	0	560.87	2011.05	0	0	0	0	0	0	0	0	0	0
NOC4L	0	7443	5531.5	0	7772.25	5597.65	0	0	0	0	0	0	1370.9	526.7	1164.55	2111.75	434.115	1084.7	0	0	0	0	0	0	3248.35	1649.95	917.615	3401.85	528.395	1618.25	0	0	0	0	5581.85	4302.8	902.44	3846.4	4469	0	0	0	0	0	0	440.08	3343.8	1132.78	0
NOPCHAP1	0	1738.9	948.91	0	0	0	0	0	0	0	0	0	0	0	0	0	0	0	0	0	0	0	0	0	0	0	0	0	0	0	0	0	0	0	0	0	0	0	0	0	0	0	0	0	0	0	0	0	0
NPM3	0	14814.5	9975	675.9	7687.1	8679	0	0	0	8890.35	587.55	3677.15	0	0	0	365.9	383.53	485.465	3633.9	2664.3	2603.45	8372.3	4175.1	3414.65	4281.05	2828.05	691.715	5032.3	1511.7	3123.15	0	0	0	0	8444.2	5214.65	473.49	11314.5	6726	2885.35	0	1385.15	3255.4	0	2298.65	0	0	0	0
NSFL1C	0	750.325	636.05	1117.5	647.905	934.455	1550.65	0	795.905	1130.45	853.03	1920.5	1380.1	5064.05	3227.75	3175.95	9517.4	5974.45	0	7014.35	4284.8	0	15364	11258	170.35	2377.65	5702.05	588.415	3392.25	2244.45	0	0	0	0	761.96	348.7	0	4113.85	3657.1	1870.7	1381.2	1192.1	5320.85	0	2573.65	3334	1353.05	2520.1	2408.3
NSUN2	0	676.78	379.6	0	919.48	350.66	0	0	0	813.845	0	418.91	0	0	0	0	0	0	0	3342.65	2163	0	9506.15	9593.5	0	0	0	0	0	0	0	0	0	0	1131.3	1795.3	0	3740.2	2390.35	5197	0	2832	9054.15	0	3625.95	0	0	0	0
NUCKS1	0	973.73	560.645	0	1011.2	755.175	0	0	0	0	0	0	0	0	0	0	0	0	0	0	0	0	0	0	0	0	0	0	0	0	0	0	0	0	790.795	646.78	0	0	0	0	0	0	0	0	0	0	0	0	0
NUDC	0	1925.05	973.95	1711.45	2711.1	2649.2	4130.75	150.495	3478.35	580.32	0	3556.8	0	2152.45	1893.7	1810.85	3392.5	2733.8	0	11213	6759.75	0	21262	21051.5	271.295	1090.18	1623.55	781.435	1357.75	1602	0	0	0	0	3066.3	2454.2	0	2473.4	4101.7	4592.9	1343.7	3619.8	10943	0	8572	2907.65	766.225	1606.05	1117.8
NUP160	0	2476.85	3378.75	0	4028.45	2438.55	0	0	0	0	0	0	0	0	0	0	3828.4	2728.85	0	0	0	0	0	0	2984.3	2682.7	4420.9	2309.75	3637.15	3287.95	0	0	0	0	0	0	0	3381.65	3373.1	0	0	0	0	0	0	0	0	0	0
NUP37	0	7242.2	2495.3	0	8507.2	3877.5	0	0	0	8074.4	0	5196.1	0	0	0	0	0	0	0	0	0	0	0	0	3648.9	9578.7	7325.25	5119.6	4921.75	5362.1	0	0	0	0	13356.5	4410.2	5435.5	16285	7666.15	0	0	0	0	0	0	0	0	0	0
NUP93	0	1118.86	913.63	0	890.875	939.965	799.29	0	1364.9	521.07	0	497.645	455.87	662.815	629.555	895.7	1723.05	897.37	0	656.915	715.395	0	1650.1	1032.35	2481.05	3262.35	1546.05	40938.5	728.34	19290	0	0	0	0	1009.78	3320.1	873.73	639.45	1254.56	564.255	0	1581.15	2725.55	0	971.585	2287.6	1589.4	3012.15	633.21
NUP98	0	809.02	2608.3	213.454	4255.3	2381.05	0	0	0	0	0	0	0	2179.85	1405.94	523.75	7990.8	3185.55	0	0	0	0	0	0	1388.85	4675.3	12521.5	36574.5	7882.2	20490	0	0	0	0	4393.6	2637	828.8	3182.05	3574.1	0	0	0	0	0	0	1790.05	1874.9	1439.65	555.005
ODR4	0	1119.7	994.045	0	1800.45	1096.55	0	0	0	0	0	0	0	683.69	718.345	0	0	0	0	0	0	0	0	0	0	0	0	1732.55	621.99	1711.5	0	0	0	0	1675.1	1277.64	0	1078.2	1019.84	0	0	0	0	0	0	0	0	0	0
ORMDL1	0	4496.7	2346.2	0	4985.05	2724.6	0	0	0	0	0	0	0	0	0	0	0	0	0	0	0	0	0	0	0	0	0	3439.1	0	1956.55	0	0	0	0	5709.5	2921.2	0	6696.75	3739.6	0	0	0	0	0	0	0	0	0	0
OSTC	0	7358.4	4651.8	0	10238	7032.4	0	0	0	3714.1	0	1789.6	0	0	0	0	0	0	0	0	0	3836.75	1283.7	1281.85	8419.15	2673.6	0	14249.5	0	6668.3	0	0	0	0	12277.5	8411.75	888.76	10988	11440.5	4162.1	0	1297.7	0	0	0	0	0	0	0
P4HA1	0	2462.2	2013.4	0	2999.95	3169.6	0	0	0	0	0	0	0	0	0	0	0	0	0	2313.8	1662.5	0	3808.8	2993.1	0	0	0	734.75	0	1329.45	0	0	0	0	2314.85	3020.65	0	2034.95	2739.45	1452.55	0	2332.2	2272.25	0	3419.85	0	0	0	0
PACSIN2	0	555.155	289.165	713.48	721.38	548.785	0	0	0	1083.43	0	1073.7	0	0	0	0	0	0	0	0	0	0	2330.15	1984.75	0	0	0	963.435	0	394.83	0	0	0	0	943.955	634.39	0	2829.95	1076.88	1665.1	0	1192.6	2886.4	0	1160.7	0	0	0	0
PAIP1	0	928.75	1961.85	0	3438.6	1750.9	1097.31	0	1514.7	2265.05	0	1358.55	0	4030.35	2552.75	958.67	4457.5	1307.75	0	2081.8	1211.7	0	1714.35	3354.25	2219.75	3355.75	3668.4	3071.55	4165.45	3946.3	0	0	0	0	4062.55	2776.85	0	6584.3	3169.15	1257.5	0	2151	1991	0	2314.15	5324.8	0	2255.4	4555.05
PAK2	0	2277.85	1443.15	0	0	0	490.78	0	2955.55	311.17	0	2444.3	0	0	0	0	0	0	0	1705.35	3749.8	0	8201.4	4251.4	0	0	0	1065.8	0	719.35	0	0	0	0	0	0	0	2828.35	1215.7	2093.1	0	492.605	6789.25	0	1013.42	0	0	0	0
PARK7	0	841.4	1130.45	1494	1544.1	483.675	4473.8	0	4286.85	8313.9	0	5698.4	0	1682.8	89.699	978.78	3965.1	2893.95	0	6790.9	5863.65	0	16780	16606	1041.87	1301.15	2542.4	2979.35	0	2016.7	0	0	0	0	0	0	0	9955.3	4695.55	1971.45	0	3313.3	12494	0	5664.7	0	0	0	0
PARS2	0	2846.95	466.3	0	2024.35	1615.3	0	0	0	0	0	0	0	0	0	0	0	0	0	0	0	0	0	0	0	0	0	0	0	0	0	0	0	0	798.945	1000.47	0	0	0	0	0	0	0	0	0	0	0	0	0
PARVB	0	23394	5612.55	0	34917	21906.5	0	0	0	13935.5	0	11013	0	0	0	0	0	0	0	0	0	0	10145.9	4203.6	0	0	0	0	0	0	0	0	0	0	29605.5	19348	0	18888	23594	0	0	0	5446.5	0	3550.95	0	0	0	0
PAXBP1	0	6072.95	4286.1	0	4810.55	1214.6	0	0	0	0	0	0	0	1927.95	1302.2	0	0	0	0	0	0	0	0	0	3391.1	2772.25	1432.95	1005.35	3539	2476.05	0	0	0	0	8067.1	4038.7	1576.6	5007.65	3621.3	0	0	0	0	0	0	1970.65	858.34	1012.14	0
PCYOX1	0	693.27	1870.3	390.26	1473.3	1179.65	8812.15	0	994.355	3072.2	0	2055.25	0	0	0	0	0	0	0	1001.68	270.31	0	3088.45	2386.55	534.12	162.715	243.62	2392.95	0	1405.63	0	0	0	0	2057	2303.9	0	3152.65	3308.6	5359.05	0	9168.25	9249.5	0	7040.05	0	0	0	0
PDCD2L	0	2115.25	602.14	0	1527.75	1229.06	0	0	0	0	0	0	0	0	0	0	0	0	0	0	0	0	818.57	420.105	0	0	0	0	0	0	0	0	0	0	1878.1	660.965	0	2177.05	1360.6	0	0	0	0	0	0	0	0	0	0
PDLIM5	0	4470.6	4695	635.05	9321.75	3996.65	6083.8	1235.94	3383.55	12785.5	1920.33	15668.5	1717.85	3286	1869.65	1109.88	2390.05	1209.5	0	2800.9	2352.95	0	3135.1	2699.45	1242.56	2268.95	2509.45	11390.5	5284.45	9637.2	0	0	0	0	10166.5	6292.85	0	11715.5	9779.5	5775.05	2262.65	6466.6	14037	2442.1	8881.3	2056	2715.65	2047.2	376.05
PEG10	0	3704.85	1993.75	1798.7	5021.45	2936.6	0	0	0	3576.3	0	2072.95	0	1568.9	554.84	477.81	1229.7	31.876	0	2375.8	2447.4	0	6292.95	4501.6	1358.25	1582.15	1083.63	1311.75	1224.2	609.66	0	0	0	0	6932.8	3853.45	0	8172.55	7424.7	2955.85	0	1203.4	3959.75	0	1508.99	0	0	0	0
PELO	0	3733.1	1669.35	0	3666.55	1179.55	0	0	0	0	0	0	0	0	0	0	0	0	0	0	0	0	0	0	0	0	0	1173.75	707.45	1393.3	0	0	0	0	4040.45	1763.9	0	4202.05	2090.1	0	0	0	0	0	0	0	0	0	0
PES1	0	1108.23	491.58	0	1082.17	505.02	0	0	0	0	0	0	0	0	0	0	0	0	0	0	0	0	0	0	0	0	0	0	0	0	0	0	0	0	651.04	437.78	0	591.845	665	0	0	0	0	0	0	0	0	0	0
PEX16	0	2170.25	1280.3	0	2119.95	1246.15	0	0	0	0	0	0	0	0	0	0	0	0	0	0	0	0	0	0	0	0	0	0	0	0	0	0	0	0	0	0	0	1568.25	1255.75	0	0	0	0	0	0	0	0	0	0
PEX19	0	4380.75	2319.1	0	1472.6	925.48	0	0	0	0	0	0	0	0	0	0	0	0	0	0	0	0	1247.2	303.585	2622.6	801.08	0	3988.5	0	1681.4	0	0	0	0	1053.4	1010.88	0	1029.51	3335.95	0	0	0	0	0	0	0	0	0	0
PEX5	0	4011.75	971.88	0	0	0	0	0	0	0	0	0	2167	1857.6	1947.05	1766.8	1444.55	1482.75	0	0	0	0	0	0	0	0	0	0	1995.65	1066.04	0	0	0	0	3311.65	1966.1	0	2174.3	2639.05	2424.6	798.71	1191.07	2968.85	0	1225.4	0	0	0	1603.9
PI4K2A	0	3581.65	1708.1	0	3445.1	2081.95	0	0	0	0	0	0	0	0	0	0	0	0	0	0	0	0	0	0	0	0	0	0	0	0	0	0	0	0	5197.95	3930.15	0	6031	3488.7	0	0	0	0	0	0	0	0	0	0
PIGK	0	258.98	155.65	0	0	0	0	0	0	0	0	0	0	0	0	0	0	0	0	0	0	0	0	0	0	0	0	0	0	0	0	0	0	0	172.915	327.18	0	79.3365	228.085	0	0	0	0	0	0	0	0	0	0
PIGS	0	2773.65	1313.65	0	2919.95	2351.15	0	0	0	0	0	0	0	0	0	0	0	0	0	0	0	0	0	0	0	0	0	2252.7	0	419.74	0	0	0	0	3048.5	1941.85	24.6315	2175.4	1458.3	0	0	0	0	0	0	0	0	0	0
PIGT	0	532.235	841.275	0	668.165	448.6	0	0	0	0	0	0	0	0	0	0	0	0	0	0	0	0	0	0	0	0	0	1073.83	0	405.865	0	0	0	0	662.69	826.095	0	299.705	369.155	0	0	0	0	0	0	0	0	0	0
PIK3CA	0	4794.95	2313.4	0	3034.65	2173.05	0	0	0	0	0	0	0	0	0	0	0	0	0	0	0	0	0	0	0	0	0	0	0	0	0	0	0	0	6248	3655.6	961.88	3019.7	1933.85	0	0	0	0	0	0	0	0	0	0
PIN1	0	2183.1	1067.75	0	974.355	1671.55	0	0	0	0	0	0	0	0	0	0	0	0	0	1519.4	697.455	0	2511.95	2896.55	0	0	0	0	1862.6	828.43	0	0	0	0	361.765	1133	0	0	0	543.415	0	417.515	957.465	0	1004.66	0	0	0	0
PIP4K2A	0	3991.95	3538.35	0	4009.95	3228.05	0	0	0	0	0	0	0	0	0	0	0	0	0	0	0	0	0	0	2317.2	2050.65	589.57	2215.45	1614.5	2223.45	0	0	0	0	4205.75	3992.5	1395.21	520.115	2396.5	693.285	0	384.14	0	0	0	0	0	0	0
PIP4K2B	0	6188.55	2465.8	0	3417.6	1864.15	0	0	0	0	0	0	0	0	0	0	0	0	0	0	0	0	0	0	0	0	0	0	0	0	0	0	0	0	7172.05	4335.1	0	2635.2	2467.3	0	0	0	0	0	0	0	0	0	0
PLCB1	0	837.505	2448	0	0	0	0	0	0	4548	0	1877.85	0	0	0	0	0	0	0	0	0	0	0	0	0	0	0	0	0	0	0	0	0	0	0	0	0	0	0	1103.19	0	809.06	0	0	0	0	0	0	0
PLEKHG3	0	423.56	478.265	0	434.125	712.11	7137.6	0	4341.95	8767.1	0	7402.8	0	2795.05	2290.5	0	5474.25	2273.35	0	11127	7894.05	0	10362	8441.3	0	3534.3	6030.35	757.27	5514.45	3024.5	0	0	0	0	484.54	1098.1	0	720.96	638.48	10784	0	6906.75	10251.9	1197.3	6795.2	0	0	0	0
PLPBP	0	10429.5	7142.35	1193.99	8930.9	6558.8	3658.35	0	1218.68	5549.45	433.67	3611.9	0	774.05	662.545	566.97	570.34	0	0	2067	939.83	0	5048.75	3252.95	561.395	717.065	0	1135.2	326.971	1558.35	0	0	0	0	6520.2	3648.4	0	7410.7	5756.85	4952.75	0	922.865	4869.25	0	1863.7	0	0	0	0
PLS3	0	199.955	280.335	1885.8	83.693	271.26	13406.5	0	4971.6	24022.5	0	24340	0	1313.3	83.313	253.62	2069	1532.7	0	19470.5	15442	0	7463.4	18758	355.385	929.945	1851.8	373.045	374.59	690.99	0	0	0	0	398.76	784.98	0	1547.45	1776.7	4443.35	0	7705.5	32647.5	2447.8	35963	1653.2	565.6	718.405	1201
PNPO	0	11523	4380.7	0	7400.4	5586.35	0	0	0	5054.5	0	3092.75	0	2784.3	1588.95	751.53	10139.5	3374.5	0	6379.15	4209.2	0	17475	10237.5	2307.35	3015.35	2720.55	0	1622.1	1007.62	0	0	0	0	6078.4	3823.45	0	4446.95	4973.45	0	0	0	5715.9	0	3355.85	0	0	0	0
POLDIP2	0	2102.45	2327.1	1201.9	840.52	1185.06	0	0	0	2998.05	0	2523.15	1494	1855.45	1435.05	769.96	888.91	721.235	0	1791.85	1098.33	0	2050.15	2850.95	4235.5	3050.35	2596.8	3289.05	3016.05	3864.95	0	0	0	0	1975.05	2874.8	692.11	2942.65	2877.8	3774.9	0	2253.75	4278.45	0	4057.4	1663.15	964.39	853.14	505.61
POLR2H	0	1740.9	921.605	640.14	2075.05	1239.6	0	0	0	1195.21	0	2350.05	633.515	728.445	1003.5	916.74	1018.05	924.555	0	969.61	841.745	0	2264.05	1431.9	695.21	840.82	979.16	4456.4	1202.43	4145.4	0	0	0	0	1665.25	941.67	234.74	1489.3	1838.3	730.37	0	525.28	0	0	0	0	0	0	0
PON2	0	5361.35	1993.4	0	6232.75	4615.05	0	0	0	6144.95	0	2958.95	0	0	0	0	0	0	0	0	0	0	5125.35	2868.7	0	0	0	1797.95	490.7	1100.51	0	0	0	0	7085.55	5152	0	11703.5	7141.25	7860.4	0	3492.4	12021.5	0	5048.3	0	0	0	0
PPA1	0	1821.3	1582.15	0	464.645	912.075	5978.25	0	2461.6	1546.6	0	1056.1	0	2348.85	935.915	0	6115.45	1906.8	0	23918.5	14808	0	50036.5	51355	5496.85	4275.6	2839.5	10539.2	1553.85	6516.55	0	0	0	0	246.09	925.34	0	3012.25	4615.65	3934.9	0	3187.35	13459	0	10357.5	1397.25	736.74	1021.6	0
PPIH	0	2661.15	1858.7	0	3032	1837.5	0	0	0	0	0	0	0	0	0	0	1781.25	1190.75	0	0	0	0	0	0	0	0	0	0	0	0	0	0	0	0	3378.25	1845.85	0	1507.5	1908.85	0	0	0	0	0	0	1404.25	1414.3	1421.55	0
PPIL3	0	3993.45	1992.25	0	2770.8	2078.8	0	0	0	572.58	451.69	862.27	4336.3	1084.27	3730.8	1077.7	810.07	904.55	0	0	0	0	0	0	1030.67	958.475	845.55	455.79	1735.75	895.24	0	6983.35	3670.3	0	1136.8	895.77	0	0	0	0	0	0	0	0	0	228.71	4716.1	1817.8	0
PPP1R9B	0	241.245	99.225	0	0	0	0	0	0	25026	0	12170	0	0	0	0	0	0	0	4616.75	2339.15	0	3472.8	1670.15	0	0	0	0	0	0	0	0	0	0	113.474	164.555	0	403.64	99.8155	930.045	0	490.54	2994.3	0	1130.05	0	0	0	0
PPP2CA	0	4909.95	2926.2	2133.65	5012.25	4906.85	10043.8	0	3836.5	6777.05	0	6586	1203.99	7119.25	3280.75	3082.95	7402.9	4361.6	0	10007.3	6215	0	18568.5	14971.5	3793.8	5827.1	6822.15	10290.4	5000.9	8308.15	0	0	0	0	4462.05	3755.5	871.485	2969.75	7518.45	5224.2	918.92	6685.1	10674	836.17	9802.65	3930.1	3494.65	3330.45	3333.55
PPP6C	0	4277.8	3488.05	1022.6	5168.4	3889.35	0	0	0	3603.05	0	1852.75	0	2135.3	674.075	1320.8	3483.75	1652.15	0	2674.95	1422.4	0	6026.4	4700.4	1810.35	1516.02	2570.3	1555.45	2100.65	2197.65	0	0	0	0	4165.3	3323.25	0	5728.5	4616.85	3029	0	2120.6	3364.5	0	2444.55	0	0	0	0
PRCP	0	1791.4	1860.45	0	2569.85	4690.05	5918.05	0	765.155	1758.5	0	5084.95	0	1762.8	2598.15	1271.6	1702.4	494.51	0	5475.3	2491.45	0	8967.2	6546.8	0	0	0	12002	909.37	6525.65	0	0	0	0	3770.35	4416.75	0	4426.35	3881.55	8256.05	0	3932	8635.3	0	6159.05	0	0	0	0
PRDX3	0	3078.35	2742.35	0	3004.5	4247.5	6404.6	0	4208.4	0	0	0	0	4913.6	3032.05	2349.55	10018.9	6376.2	0	5388.45	3388.8	0	7639.95	9665.45	1507	3096.4	7822.25	27631.5	6077.05	18141	0	0	0	0	0	0	0	12398	12381.2	7612.9	0	5834.2	5833.55	0	8975.15	5518.55	1683.19	4888.85	0
PRKRA	0	2399.35	1343.25	0	1048.1	1011.33	0	0	0	0	0	0	0	0	0	0	0	0	0	0	0	0	0	0	0	0	0	0	0	0	0	0	0	0	1123.95	1183.9	0	1123.66	1168.06	0	0	0	0	0	0	0	0	0	0
PRKRIP1	0	2365.1	777.175	0	0	0	0	0	0	0	0	0	0	0	0	0	0	0	0	0	0	0	0	0	0	0	0	0	0	0	0	0	0	0	2719.35	888.9	0	2512.75	1485	0	0	0	0	0	0	0	0	0	0
PRMT3	0	7777.5	3112.4	0	1732.6	1821.45	0	0	0	1319.85	0	1285.65	0	943.8	1264.1	823.3	787.435	797.605	0	1532.3	594.625	0	4297.8	2303.45	1194.85	820.405	1371.8	0	1499.7	483.385	0	0	0	0	4545.05	4154.4	2414.8	937.855	2056.7	1360.75	0	849.115	1634.05	0	654.335	0	0	0	0
PROX1	0	12610.2	10128	2302.35	37704.5	36711	0	0	0	5345.05	0	5783.55	0	1305.25	1115.08	0	0	0	0	7338.4	1476.36	0	17167	6986.1	0	0	0	0	3949.35	2485.95	0	0	0	0	26289.5	10605.7	0	15916	25563	0	0	0	0	0	0	0	0	0	0
PRPF40A	0	4287.45	2764.55	0	0	0	0	0	0	0	0	0	3530.25	2202.9	2120.95	0	0	0	0	0	0	0	0	0	2473.15	2706.4	4043.85	5598.3	3227.15	3411.75	0	0	0	0	0	0	5439.45	2998.95	2111.05	0	0	0	0	0	0	1268.8	3453.95	4297.85	0
PRXL2A	0	1216.9	776.5	0	1232.4	1952.45	0	0	0	1058.7	0	870.75	0	0	0	0	0	0	0	0	0	0	0	0	0	0	0	2494.4	0	1334.65	0	0	0	0	0	0	2209.8	2188.6	3231.65	0	0	0	1157	0	808.06	0	0	0	0
PTGES3	0	14445.5	8365.4	3807.6	13373.5	12057	23378.5	0	9628.95	31399	0	18923	0	6495.25	3096	0	6720.6	1492.1	0	22114	13328	0	61319.5	43659.5	5031.7	4295.6	5877.85	4821.05	5033.25	5099.95	0	0	0	0	19466.5	12933	1648.25	22773.5	19351.5	23901.5	0	12115	38154.5	4673.5	27824	0	0	0	5059.6
PTMS	0	2668.8	733.99	0	0	0	0	0	0	3579.8	0	1508.3	0	0	0	0	0	0	0	0	0	0	682.965	621.245	0	0	0	0	0	0	0	0	0	0	0	0	0	3730.15	1556.8	0	0	0	0	0	0	0	0	0	0
PTPN1	0	2539.8	1593.75	0	3355.3	1713.35	0	0	0	4488.9	0	1280.75	0	0	0	0	0	0	0	446.58	263.975	0	1920.85	817.755	0	0	0	11659	0	3619.95	0	0	0	0	7557.25	4956.25	0	9976.1	6669.05	3675	0	973.825	2640.6	0	775.245	0	0	0	0
QARS1	0	8369	4499.65	96.467	6474.2	5993.65	3644.75	0	1283.6	1424.4	0	1102.1	0	670.6	480.605	0	2804.35	1085.23	0	2488.3	1425.85	0	7896.65	6195.5	1963.1	1645.5	950.795	2003.2	691.365	1326.15	0	0	0	0	7584.35	7219.7	175.14	4656.35	5477.15	5662.1	0	3878.95	9390.5	0	3843.55	0	0	0	0
QPCTL	0	845.81	756.215	0	0	0	0	0	0	0	0	0	0	0	0	0	0	0	0	0	0	0	0	0	0	0	0	0	0	0	0	0	0	0	0	0	0	0	0	0	0	0	0	0	0	0	0	0	0
RAB10	0	2196	1396.6	3188.5	2738.25	1858.2	1925	0	1042.03	8001.6	0	4927.75	0	0	0	427.69	463.96	395.37	3009.4	724.745	551.93	5653.4	1930.25	1138.95	2811.2	2989.5	585.53	1274.9	1215.5	1004.72	0	0	0	0	4331.55	3253.95	0	5556.1	5258.05	2837.1	0	2154.65	2888.35	0	1649	0	0	0	0
RAB11B	0	2095.2	1790.25	2606.75	6790.75	5931.65	10960.5	0	7389.4	4570.6	0	7881.4	0	1632	1299.64	1250.2	4864.95	2756.95	1149.1	7996.1	6197.6	0	14822.5	9821.2	2722.9	1838.3	1183.7	11255.5	1024.66	8139.45	0	0	0	0	5222.95	7755.75	0	16055	14046	10700	617.58	8866.3	11303	0	7538.8	2267.05	594.33	2201.45	2091.9
RAB14	0	849.07	966.555	0	1410.95	861.045	0	0	0	0	0	0	0	0	0	0	0	0	0	0	0	0	1047.63	1034.97	0	0	0	3998.05	0	1446.6	0	0	0	0	3448.25	2954.2	0	2602.5	4006.2	622.91	0	1408.36	1745.6	0	508.99	0	0	0	0
RAB35	0	4009.05	2990.5	0	3665.95	3147.6	0	0	0	3100.6	0	2908.8	0	0	0	0	0	0	0	0	0	0	3000.15	5503.15	4373.9	1568.25	0	8032	0	3347.1	0	0	0	0	13368	5913.45	0	9893.85	8958.3	6756.7	0	3946.3	8384.55	0	2206.2	0	0	0	0
RAB5IF	0	520.435	311.15	0	0	0	0	0	0	0	0	0	0	0	0	0	0	0	0	0	0	0	0	0	0	0	0	0	0	0	0	0	0	0	0	0	0	0	0	0	0	0	0	0	0	0	0	0	0
RAB7A	0	4383.95	10638.6	1685.5	6733.1	8105.35	27808.5	2938.9	13776	12314.1	0	11929	0	4426.55	1089.82	0	17658.5	4431.6	0	19601	15642.5	1988.4	5304.9	21618	8896.95	9706.55	16462.5	70629	3675.65	31660	0	0	0	0	8051.25	12183.5	0	11743.9	14404.9	22137	0	24762.5	22938.5	0	24268	4072.5	1143.52	2294.4	0
RAD23B	0	1347.31	477.42	0	0	0	4173.9	0	895.79	0	0	0	0	1042.1	718.09	91.335	2887.45	876.535	0	7422.55	5810.6	0	28257	14718.5	895.23	1252.95	1952.9	9816.1	804.99	4929.65	0	0	0	0	0	0	0	4328.15	2453.1	2107.93	0	1210.15	8641.4	0	5184.15	0	0	0	0
RALA	0	714.13	2069.85	0	2013.35	3327.1	0	0	0	4041.35	0	1375.55	0	0	0	0	0	0	0	0	0	0	1988.85	782.525	0	0	0	5671.35	0	2571.45	0	0	0	0	2626.1	2378.7	0	4982.2	9928.3	5212.7	0	1868.9	0	0	0	0	0	0	0
RAP1B	0	27410	18917	0	23227.5	11471	6466.75	0	2717.2	11898	0	6930.9	0	0	0	0	0	0	0	4290.55	2832.75	3813.1	4556.6	5991.9	8436.85	1680.9	576.72	15472.5	572.05	6686.15	0	0	0	0	20901	12315.5	731.58	17605.5	15001	14878	0	3953.55	6340.3	0	4241.4	0	0	0	0
RASA1	0	2610	817.13	0	939.555	666.55	0	0	0	0	0	0	0	0	0	0	0	0	0	0	0	0	0	0	0	0	0	0	0	0	0	0	0	0	0	0	0	0	0	0	0	0	0	0	0	0	0	0	0
RBIS	0	2969.05	1000.84	0	3054	1067.6	0	0	0	0	0	0	0	0	0	0	0	0	0	0	0	0	0	0	0	0	0	0	0	0	0	0	0	0	2268.9	1170.27	0	1208.9	875.955	0	0	0	0	0	0	0	0	0	0
RBM12	0	3081.3	4217.3	1645.7	771.13	3894	2208.1	702.97	1780.95	0	0	0	1914.6	2130.8	2310.05	1697.2	2132.8	2126.2	0	3216.9	2145.85	1262.1	982.825	2530.6	1678.9	2043.65	1709.25	2148.6	1915.75	1975.75	0	0	0	0	0	0	0	0	0	0	0	0	0	0	0	2487.9	1448.35	1551.95	0
RBM4	0	5789.5	3649.9	0	1327.7	2180.75	0	0	0	0	0	0	0	1228	1178.95	1991.5	1033.39	1088.3	0	0	0	0	0	0	5377.85	2285.2	1523.6	2672.2	1329.95	1954.4	0	0	0	0	1975.35	3651.55	0	1760.05	765.675	0	0	0	0	0	0	944.9	1839.2	530.7	0
RBMS1	0	1692.59	2810.95	1246.3	2611.5	1866.7	1768.7	3482.5	1873.75	0	0	0	2434	6905	5284.85	3715.35	4843.4	4666.05	0	0	0	0	0	0	2747.4	3945.9	4986.8	13403.5	6794	12801.5	0	3978.95	2808.85	0	0	0	0	985.5	1530.7	0	0	0	0	0	0	3712.8	4349.65	3871.85	2736.9
RCC1L	0	669.21	657.66	0	632.91	644.055	0	0	0	0	0	0	0	0	0	0	0	0	0	0	0	0	0	0	0	0	0	0	0	0	0	0	0	0	597.18	1037.31	0	0	0	0	0	0	0	0	0	0	0	0	0
RCL1	0	3363.45	2633.8	0	5146.4	4135.15	0	0	0	0	0	0	2671.25	5328.2	4428.2	3315.3	2648.45	3281.4	0	0	0	0	0	0	1809.7	4206.9	8264.55	1293.35	6444.55	4269.85	0	0	0	0	3106.75	2385.25	2701.4	2027.75	2332.7	0	0	0	0	0	0	2811.6	3703.3	2596.3	841.8
RDH11	0	2865.6	1812.8	0	2912.9	2381.45	0	0	0	0	0	0	2778.15	0	898.08	2153.15	0	1046.8	0	0	0	0	0	0	2280.5	1542.3	665.465	1870.7	206.43	700.755	0	0	0	0	3332.1	4360.6	849.28	4778.8	3108.5	3009.55	0	2062.45	2056.45	0	1820.15	0	0	0	0
RDH14	0	2415.4	917.9	0	2551.4	1227.6	0	0	0	0	0	0	0	0	0	0	0	0	0	0	0	0	0	0	0	0	0	0	0	0	0	0	0	0	3593.4	2061.8	0	3375.5	2285.7	0	0	0	0	0	0	0	0	0	0
RDX	0	20327	12290.5	1703.31	21788	14760.5	0	0	0	0	0	0	0	0	0	0	0	0	0	0	0	0	0	0	0	0	0	0	0	0	0	0	0	0	23213.5	14182.5	2659.25	24967.5	18389	0	0	0	7676.45	0	3347.65	0	0	0	0
RER1	0	4912.3	4693.25	0	2450	4106.6	0	0	0	0	0	0	0	0	0	0	0	0	0	0	0	0	0	0	7192.25	1437.05	0	6200.3	0	1575.1	0	0	0	0	1406.28	5020.15	0	361.375	623.985	0	0	0	0	0	0	0	0	0	0
RFC3	0	5038.1	3444.1	0	2676.2	3888.25	0	0	0	0	0	0	0	1146.75	1292.85	1733.6	2538.9	1732.6	0	0	0	0	0	0	1917.6	2705.5	4311.2	3294.6	4029.7	1813.95	0	0	0	0	3352.4	2966.65	2714.1	950.215	1789.9	0	0	0	0	0	0	0	0	0	0
RFC5	0	2571.85	1052.15	0	2165.8	1634.3	0	0	0	0	0	0	1500.3	463.1	904.81	1218.85	1981.55	1453.95	0	0	0	0	0	0	1537.4	2697.25	1953.35	1475.3	459.885	1073.08	0	0	0	0	1488.6	1450.41	1785.1	1651.2	621.245	0	0	0	0	0	0	844.07	1779.95	1279.5	0
RGL2	0	6499.15	1236.94	0	5248.5	2128.8	0	0	0	0	0	0	0	0	0	0	0	0	0	0	0	0	0	0	0	0	0	0	0	0	0	0	0	0	6693.2	3444.35	0	7241.15	3310.55	0	0	0	325.43	0	39.172	0	0	0	0
RHOA	0	6971.9	6103.45	2556.3	13575.5	14368	17268	1587.65	8612.25	10977	0	17872	0	1713.1	928.63	0	0	0	1894.6	20107	9914.4	2798.2	21340.5	24997.5	6046.2	5132.85	3923.3	18761.5	3175.35	9980.85	0	0	0	0	21864.5	17601.5	0	44063.5	37042	32232.5	427.65	13183	16550.5	897.76	15499	0	0	0	0
RIN2	0	5368.3	3801.15	0	599.75	1755.8	0	0	0	0	0	0	0	0	0	0	0	0	0	0	0	0	0	0	0	0	0	0	0	0	0	0	0	0	1150.5	7465.75	0	0	0	0	0	0	0	0	0	0	0	0	0
RNF121	0	3185.55	2516.6	0	1338.3	2543.5	0	0	0	0	0	0	0	0	0	0	0	0	0	0	0	0	1649.6	3495.1	0	0	0	0	0	0	0	0	0	0	1360.75	2734.75	0	0	0	0	0	0	0	0	0	0	0	0	0
RNH1	0	1800.7	2330.9	900.77	1182.75	3465.05	14311.5	0	6794.95	1204.1	0	2281.6	156.88	2254.3	1054.81	1799.3	6181.85	3035.1	0	13724.5	9519.2	0	29279	27867.5	673.355	1640.85	2021.7	3930.55	624.36	2314.55	0	0	0	24.887	1731.25	3857.5	0	1500.05	4647.85	11480.5	767.565	8764.75	20619.5	268.89	15856.5	2499.75	1050.14	1014.57	1625.2
RNPEP	0	1488.05	1824.65	0	978.615	1764.65	0	0	0	0	0	0	2396.95	590.38	935.57	0	0	0	0	2134.9	1158.55	0	6469.4	3202.5	0	0	0	681.83	2464.4	2458.05	0	0	0	0	642.065	1739.2	0	750.21	673.09	0	0	0	507.815	0	1329.4	0	0	0	0
RPL26L1	0	752.02	731.49	0	0	0	0	0	0	0	0	0	0	0	0	0	0	0	0	0	0	0	772.4	599.505	0	0	0	0	0	0	0	0	0	0	0	0	0	0	0	1126.45	0	2071.15	0	0	0	0	0	0	0
RPL3L	0	19672.7	10666.4	0	28237.5	17264	0	0	0	28790	0	48280.5	0	0	0	0	0	0	0	0	0	0	56812.5	18785.5	0	0	0	0	0	0	0	0	0	0	57736	39218.5	0	20824	26971	32220	0	4437.3	10333.1	0	3813.65	0	0	0	0
RPS27L	0	9708.05	11271	2323.5	4483.4	7410.8	1224.28	3462.6	2519.15	0	0	0	3185.4	3453.05	6322	7684.05	2708.3	4123.7	2858.6	3015.2	3308.05	0	1011.96	2288.15	5104.3	3351.3	0	763.42	4026.55	2561.1	0	0	0	3829.5	1672.25	5043	0	0	0	0	1445.05	1107.41	0	0	0	928.39	7991.8	11439	0
RPS6KA3	0	1627.3	760.645	0	1305.1	1272.9	0	0	0	1768.75	0	1937.4	0	0	0	0	0	0	0	4213.2	2538.85	0	10394.5	7455.3	1370	356.225	110.59	725.275	198.695	568.26	0	0	0	0	1784.25	1474.05	0	1161.88	2105	0	0	0	4862.85	0	2966.3	0	0	0	0
RRM1	0	1520.15	1739.6	1026.61	1663.4	2506	0	0	0	412.675	0	1337.08	3701.6	683.31	278.285	973.92	607.85	214.033	0	5225.1	2309.95	0	12049	6556.3	0	0	0	23.001	292.295	327.835	0	0	0	0	805.53	2240.95	0	565.485	649.78	3517	0	2678.3	7552.55	0	3018.7	0	0	0	0
RRP15	0	2855.5	1117.46	0	0	0	0	0	0	0	0	0	1361.05	787.635	1181.35	2047	372.23	1050.1	0	1178.95	852.405	0	0	0	2501.15	2378.7	1332.7	2849.6	860.2	2104.85	0	0	0	0	0	0	2302.2	2371.1	1591.8	0	0	0	0	0	0	0	0	0	0
RTN3	0	30228.5	24313.5	3339.75	28970	26292	7280.15	738.19	4284.85	9058.95	8014.6	8428.75	735.96	1639.35	1081.67	1382.55	2440.55	1877.6	4797	3165.5	2875.2	2734.05	7164.75	5008.85	12976.5	7095.55	2000.4	11999.5	1204.15	7044.15	0	0	0	1545.2	27910	21984	3461.5	19451	21582	10057	0	7663.55	10543	0	7187.05	821.485	973.135	1255.96	902.33
RWDD1	0	4464.4	1005.18	0	0	0	0	0	0	47823.5	0	43289.5	0	0	0	0	0	0	0	0	0	0	5445	725.265	0	0	0	0	0	0	0	0	0	0	0	0	0	0	0	0	0	0	0	0	0	0	0	0	0
SAAL1	0	35834.5	24336	734.71	28731.5	25396.5	0	0	0	0	0	0	0	0	0	0	0	0	3423.1	289.21	375.015	2852.5	1245.2	717.87	12765	4327.15	0	13367.5	0	4214.1	0	0	0	0	27540.5	32786	2469.35	11365.6	16586.5	2938.3	0	1522.45	2553.4	0	1159.85	0	0	0	0
SAMHD1	0	6485.7	7703.35	0	12363.5	7261.05	5775.1	0	130295	0	0	0	0	0	0	0	0	0	0	6513.15	4597.85	0	10561.6	8756.2	0	0	0	16406.5	931	6575.5	0	0	0	0	8880.15	7378.55	0	10130.4	14981.5	8005.05	0	6339.75	6785.25	0	6272.35	0	0	0	0
SAP18	0	2570.7	1332.55	0	1118	642.61	0	0	0	0	0	0	0	0	0	0	0	0	0	0	0	0	0	0	0	0	0	0	0	0	0	0	0	0	0	0	0	2496.25	1350.05	0	0	0	0	0	0	0	0	0	0
SAR1A	0	3484.6	3709.45	7988.5	2508.85	2488.8	14320	0	10869	7795.45	0	3070.05	820.35	4010.9	2899.65	2526.45	8498.5	6566.85	0	11636.5	11400	0	11419.5	15064	5908.5	6872.95	6674.3	9015.3	2920	5814.1	0	0	0	0	7203.65	8743.9	3598.5	10878	8896.2	5203.55	4136	11408.5	18987	3426.35	12867.5	6659.3	1989.55	4050.85	4744.85
SARS1	0	851.9	1552.85	0	0	0	0	0	0	0	0	0	0	0	0	0	0	0	0	2844.5	1868.7	0	2831.8	4735.2	0	0	0	4620.4	0	1518.35	0	0	0	0	0	0	0	0	0	1263.85	0	6141.55	2990.3	0	7163.35	0	0	0	0
SCAF4	0	7566.85	5254.25	1133.63	4416.35	3958.35	0	0	0	0	0	0	0	1956.95	952.23	0	0	0	0	0	0	0	1620.1	1097.85	2759.8	1954.9	1835.45	1660.6	3334.95	2987.8	0	0	0	5018.5	4386.4	4661.35	11030	2558.9	4201.6	0	0	0	0	0	0	0	0	0	0
SCD	0	2940.3	5274.85	0	6907.35	3417	0	0	0	0	0	0	0	0	0	0	0	0	0	0	0	0	0	0	21128.5	10239	0	8481.2	0	5548.5	0	0	0	0	7040.3	4764.6	0	6362.45	1867.95	0	0	0	0	0	0	0	0	0	0
SCP2	0	1343.73	1170.3	418.39	493.065	1502.75	0	0	0	0	0	0	647.93	1174	939.835	251.59	580.245	581.79	0	3249.35	2787.95	0	6583.7	6509.45	1517.59	890.8	1154.2	5484.6	358.67	1848.55	0	0	0	0	0	0	0	2417.1	2936.25	0	0	0	0	0	0	745.07	2692.65	3119.35	82.842
SDAD1	0	4252.35	2948	0	2633.4	2997.1	0	0	0	0	0	0	0	0	0	0	0	0	0	0	0	0	0	0	0	0	0	1667	2604.5	1979.55	0	0	0	0	1421.8	1996.35	0	1265.3	2097.6	0	0	0	0	0	0	0	0	0	0
SDF2	0	1736.45	480.415	0	2431.7	1766.3	0	0	0	0	0	0	0	0	0	0	0	0	0	0	0	0	0	0	0	0	0	0	0	0	0	0	0	0	2680.95	1125.65	0	3229.95	1755.9	0	0	0	0	0	0	0	0	0	0
SEC11A	0	3539.3	1350.4	0	2960	1997.7	0	0	0	0	0	0	0	0	0	0	0	0	0	0	0	0	0	0	0	0	0	1338.75	0	882.025	0	0	0	0	3810.45	3533.95	0	2247.2	3617.6	0	0	0	0	0	0	0	0	0	0
SEC23A	0	4304.2	1414.7	1002.5	6245.35	3877.05	4282.05	0	821.895	17669.5	768.47	10384.7	1783.85	1884.15	1636.35	1545.45	1267.19	1196.36	0	16957.5	9156.2	0	21620.5	11935	726.275	921.08	2581.35	1816.12	3826.25	2857.35	0	0	0	0	13895.5	5820.25	1768.15	12198	8103.8	11155	188.18	2406.05	11073.5	0	5750.65	1266.75	620.76	1211.8	1085
SEC23B	0	2569	939.47	0	1922.8	1442.05	0	0	0	640.22	0	815.135	0	0	0	0	0	0	0	2282	832.615	0	3065.8	1401.51	0	0	0	0	760.89	675.045	0	0	0	0	3255.85	1746.9	671.58	2596.15	2135.95	0	0	0	2513.9	0	869.32	0	0	0	0
SEC24C	0	1980.05	1637.8	0	840.205	2778.05	2941.45	0	778.46	0	0	0	0	2071.15	719.5	723.33	1439.45	917.125	0	8563.25	4493.85	0	8933.75	5792.55	481.645	1218.71	1560.1	3282	2841	3079.85	0	0	0	0	3071.5	5205.15	498.22	0	2951.4	4933.65	0	1836	3913	0	3178.65	1868.75	1052.3	2260.4	0
SEC62	0	5754.3	3523.75	0	6440.3	3491.2	0	0	0	0	0	0	0	0	0	0	0	0	0	0	0	0	0	0	0	0	0	0	0	0	0	0	0	0	7975.9	4461.3	0	7764.2	4380.45	0	0	0	0	0	0	0	0	0	0
SEC63	0	1471.05	1940.75	0	2649.8	1169.71	0	0	0	0	0	0	0	0	0	0	0	0	0	0	0	0	0	0	0	0	0	8689.65	0	3553.8	0	0	0	0	2418.25	1387.6	0	4653.95	1624.35	0	0	0	0	0	0	0	0	0	0
SEH1L	0	2955.95	1790.3	1268.6	5075.1	2159.15	0	0	0	886.5	0	736.08	0	0	0	2201.55	2797.8	2812.3	0	0	0	0	0	0	3721.15	4140.65	2690.75	2179.55	5928.55	3817.3	0	0	0	0	5411.85	2011.13	2522	1454	1864.85	0	0	0	0	0	0	3504.9	2027.95	2349.4	0
SEL1L	0	1124.98	429.425	0	911.97	609.19	0	0	0	0	0	0	0	0	0	0	0	0	0	0	0	0	0	0	0	0	0	0	0	0	0	0	0	0	2005.4	707.46	0	1049.05	1012.92	0	0	0	0	0	0	0	0	0	0
SEPTIN2	0	1220.6	1136.8	0	2019	2648.05	0	0	0	925.16	0	2696.4	0	0	0	0	0	0	0	2029.65	858.425	0	4195.5	3047.5	0	284.421	548.025	334.44	1186.37	1330.8	0	0	0	0	8113.75	8520.75	0	8651	8049.35	2580.75	0	918.095	1446.25	0	1323.7	0	0	0	0
SEPTIN9	0	1674.9	1350.65	0	3754.65	2019.35	0	0	0	1312.45	0	2609.05	0	0	0	0	0	0	0	1235.95	929.785	0	2393.35	2272.35	0	975.63	770.125	1115.91	1730.85	909.505	0	0	0	0	9638.55	7700.7	701.66	9808.85	12506	1576.5	0	1390.55	892.35	0	988.18	2011.15	943.965	1979.95	1573.75
SH3BGRL3	0	4636.75	5028.9	0	0	0	1706.15	0	2703.95	15400.5	0	3341.6	0	5647.2	3441.4	0	40299	16663.5	0	12579.5	12011.5	0	3879.7	8217.8	0	11694	21195.5	3644.4	13691	8447.55	0	0	0	0	0	0	0	0	0	0	0	0	4689.8	0	5161.8	14632.5	458.28	7005.5	14367
SHPK	0	5992.45	6722.45	0	0	0	42226.4	0	44861	69263	0	92718	0	0	0	0	0	0	0	20127	9477.85	0	20096	5535.05	0	0	0	4690.15	1576.25	2941.2	0	0	0	0	71085.5	75177.5	0	37387.5	53774.5	0	0	0	93906	0	96374.5	1276.3	10022	6590.15	0
SIGMAR1	0	2540.1	322.48	0	3071.3	1109.02	0	0	0	0	0	0	0	0	0	0	0	0	0	0	0	0	0	0	0	0	0	0	0	0	0	0	0	0	3746.45	1468.85	0	2641.9	2014.05	0	0	0	0	0	0	0	0	0	0
SKA1	0	4106.75	2017.9	0	5102.2	3009	0	0	0	2063.1	0	1025.45	1363.4	2336.2	1118.48	908.28	1570.9	1505.8	0	617.845	175.675	0	748.975	652.09	0	1351.5	941.87	641.09	2289.85	1814.8	0	0	0	0	5467	2820.8	1004.2	4539.35	3401.55	1380.15	0	1616.05	0	0	0	1419.8	1018.5	1219.8	0
SLC12A2	0	570.825	270.567	0	959.71	921.96	0	0	0	0	0	0	0	0	0	0	0	0	0	0	0	62.797	1971.65	1962.35	1920	831.275	0	6162.55	0	4713.15	0	0	0	0	2321.95	2030	0	4109.15	444.665	1086.35	0	1255.3	3346.8	0	761.75	0	0	0	0
SLC16A1	0	8431.2	7233.3	0	8582.2	6433.3	1931.08	0	1285.15	6206.6	0	6775.65	0	0	0	0	0	0	1166.3	2857.4	2020.25	0	5068.15	3961.5	6148.45	2254	0	6856.3	0	2716.75	0	0	0	0	12637	10473.7	0	11882.5	10781	7417.7	0	5148.4	5462.55	0	2947.4	0	0	0	0
SLC1A5	0	3903.4	2195.95	0	3712.6	4629.7	0	0	0	0	0	0	0	0	0	0	0	0	0	5342.4	3129.25	0	10965	6532.45	0	0	0	5411.55	398.62	3257.3	0	0	0	0	8941	14282.5	0	14580.1	10907.2	8193.95	0	2940.7	7143.15	0	6369.2	0	0	0	0
SLC25A11	0	761.655	626.9	0	5326.45	3576.6	1004.83	0	924.7	11238	0	9856.35	0	0	0	0	0	0	0	0	0	0	1291.7	1111.45	0	0	0	34892.5	423.58	16539.5	0	0	0	0	6860.8	5243.15	0	18953	19047	3569.65	0	2061.8	0	0	0	0	0	0	0
SLC35E1	0	1102.8	802.78	0	2605.8	921.385	0	0	0	0	0	0	0	0	0	0	0	0	0	0	0	0	0	0	0	0	0	0	0	0	0	0	0	0	0	0	0	0	0	0	0	0	0	0	0	0	0	0	0
SLC39A14	0	6923.45	7190.2	0	3458.75	7290	3559.9	0	1215.05	0	0	0	0	0	0	0	0	0	0	1394.85	1424.75	0	0	0	6781.65	3167.95	614.54	6569.35	0	2524.75	0	0	0	0	3628.65	8856.65	1505.4	3458.05	1623.35	2702.35	0	4672.7	831	0	2472.65	0	0	0	0
SLC4A1AP	0	510.62	980.69	807.74	1104.15	633.03	0	0	0	0	0	0	1412.05	8120.85	4647.4	3550.75	2026.4	2777.55	0	0	0	0	596.32	293.745	1492.85	3587.75	4244.45	0	9976.3	1718.75	0	0	0	0	1428.43	745.965	0	2079.2	873.495	126.91	1571	642.63	0	0	0	3138.7	4165.3	2484.45	1509.7
SLC9A3R1	0	821.815	1516.25	0	371.25	1865.1	5749.25	0	2501.5	2462.1	0	2855.45	0	0	0	151.99	2369.15	1865.5	0	13530.5	8671.4	0	15618	22022.5	1205.4	1353.05	1763.8	7759.95	566.355	5429.4	0	0	0	0	463.195	1043.47	0	2710.4	4854.15	2662.85	0	1296.3	8126.25	0	8457.45	1091.35	0	365.745	0
SNRNP70	0	1364.75	1299	0	1752.9	978.22	853.33	5757.05	27063	853.865	0	1023.71	0	3609.6	3904.4	1939.85	625.355	1569.75	0	1158.77	443.04	0	0	0	904.205	1547.95	2064.5	4996.45	4981.15	6670.15	0	0	0	0	1602.4	1637.8	1404.3	930.315	721.875	0	0	0	0	0	0	815.29	743.46	1467.69	0
SNX2	0	4646.55	3312.1	1341	3842.65	2978.15	6040.2	0	3623.8	13756	0	6750.45	0	2224.45	1947.1	1868.05	2384.8	2371.1	0	10237.1	7169.3	0	11989.5	12804.3	6938.35	5786.05	2978.9	4326.3	1186	2009.6	0	0	0	0	8403.6	3963.95	1361.6	10878.8	4987.9	7690.5	0	2494.95	8978.5	0	5197.65	0	0	0	0
SORBS2	0	2681.6	2612.7	0	1932	1792.15	0	0	0	1402.5	0	1433.6	1039.51	1452.4	940.92	0	0	0	2306.8	1400.18	1790.65	3454.85	979.42	1023.4	1215.6	1277	815.475	3017.45	2061.25	2393.9	0	0	0	0	3098.8	1255.15	825.95	1262.9	978.145	0	0	0	0	0	0	989.505	728.41	1033.1	0
SORBS3	0	3633.35	3044.25	3022.25	5622.15	2282.35	293.33	6809.35	4457.6	0	9535.9	789.495	1353.1	5902.8	3933.5	635.65	223.82	695.77	0	2911.6	2312.4	1633.9	1035.98	2631.3	4546.45	2629.1	1900.95	2911.15	6853.8	4667.2	0	0	0	0	3915.1	1701.8	0	0	0	0	0	0	0	0	0	2109	913.655	1259.52	1836.75
SORD	0	3091.15	3198.7	2457.6	4622.8	4054.75	13053	0	5889.2	7537.5	0	9843.45	0	6112	3963.6	642.255	6472.7	3493.35	0	20308	14305.5	0	38749.5	25329	4144.3	4544.1	5908.85	2714.25	4883.45	4354	0	0	0	0	5747.55	6107.5	1395.7	6673.55	6314.9	20645	465.96	11635.5	21747	1536.32	16274.5	4227.95	0	2046.1	4766.75
SPCS1	0	1788.4	2520.85	0	858.04	2550.55	0	0	0	0	0	0	0	0	0	0	0	0	0	0	0	0	0	0	0	0	0	0	0	0	0	0	0	0	0	0	0	0	0	0	0	0	0	0	0	0	0	0	0
SPCS2	0	2894.75	1953.05	0	1667.85	1868.1	0	0	0	0	0	0	0	0	0	0	0	0	0	0	0	0	0	0	0	0	0	2736	0	1521.15	0	0	0	0	2479.35	3329.8	0	1000.89	1786.5	0	0	0	0	0	0	0	0	0	0
SPINT2	0	2458.4	1338.65	0	4416.55	2108.4	0	0	0	2289.85	0	899.17	0	0	0	0	0	0	0	0	0	0	0	0	0	0	0	1400.85	0	577.155	0	0	0	0	4558.45	1631.65	0	6016.25	3079.3	0	0	0	0	0	0	0	0	0	0
SPTBN1	0	599.045	544.44	0	4051.4	3469.4	6339.2	0	4781.55	637.9	0	4699.85	0	0	0	0	0	0	0	14616.5	7077.4	0	10755.5	6217.1	0	0	0	458.15	1421.2	676.545	0	0	0	0	3505.95	3159.65	0	3051	6218.8	7089.25	0	6598.5	7512.2	0	5063.5	2248.8	1289.2	1397.75	0
SPTLC1	0	2110.35	4596.45	398.44	6922.15	4154.9	0	0	0	0	0	0	0	0	0	0	0	0	0	0	0	2857.45	838.585	0	5784.95	3487.15	1911.8	4701.95	1330.05	1906.6	0	0	0	0	6897.55	7950.9	1570.9	5628.8	3604.85	2774.85	0	1420.4	1501.9	0	1400.8	0	0	0	0
SRP19	0	23293.5	15493	0	16332.5	12742	0	0	0	2470.35	0	2127.15	0	0	0	0	0	0	0	0	0	0	0	0	14342.5	6400.35	100.01	10604.3	0	5940.25	0	0	0	0	10655	7452.05	781.775	9564.75	6194.9	1955.8	0	644.515	252.315	0	484.1	0	0	0	0
SRPK1	0	3877.9	2409.75	0	2015.7	2085.45	1428.44	0	700.605	2358.35	0	1024.93	0	0	0	0	0	0	0	0	0	0	1084.75	794.165	0	0	0	1388	167.9	392.4	0	0	0	0	0	0	0	0	0	0	0	0	0	0	0	0	0	0	0
SRRM1	0	7197.7	3341.45	0	2122.25	875.735	0	0	0	1291.05	0	771.625	0	1427.15	516.785	0	0	0	0	0	0	1147.04	2706.2	666.125	4274.05	2226.95	566.595	855.59	3282.3	1084.8	0	0	0	0	5413.65	3386.5	0	5185.3	3791.95	0	0	0	0	0	0	874.79	706.415	0	0
STAT3	0	1780.8	1627.95	0	1823.25	1284.3	0	0	0	3268.95	0	744.23	0	956.625	1024.38	0	0	0	0	0	0	0	2229.65	1413.65	852.745	986.09	1056.65	1142.3	1213.7	789.605	0	0	0	0	3163.05	3427.45	0	1331.77	2383.4	1733.15	0	1532.55	2334.35	0	1271.4	0	0	0	0
STK24	0	9620.5	6238.25	0	5116.95	4048.5	1050.12	0	1370.15	2358	707.68	1763.15	0	3268.3	3278.05	1123.9	3226.75	2380.05	0	1274.98	1198.3	0	724.275	1241.35	2643.4	1756.35	1389.31	2775.7	2010.7	3196.75	0	0	0	0	6396.25	4415.15	0	5517.55	4899.1	2337.2	0	2318.45	5861	0	2242.65	1872.55	991.21	1533.9	1139.9
STK38L	0	3076.4	2193.35	0	2426.4	1536.05	0	0	0	0	0	0	1793.6	2013.95	2957.55	4760	1222.55	3210.4	0	0	0	0	2756.6	733.665	974.75	1288.5	1679.15	752.98	2617.2	1735.4	0	0	0	0	2711.75	2138.15	799.03	373.91	1095.56	0	0	0	0	0	0	0	2872.8	1387.47	0
STT3B	0	1668.3	928.6	0	0	0	0	0	0	0	0	0	0	0	0	0	0	0	0	0	0	0	0	0	0	0	0	1549.3	0	1393.46	0	0	0	0	3375.2	1227.16	0	0	0	0	0	0	0	0	0	0	0	0	0
SUCLA2	0	1505.65	1475.75	1151.3	1676.3	1660.5	5328.8	0	2941.8	0	0	0	0	0	0	0	0	0	0	3344.7	2214.9	0	3543.95	6926.05	0	0	0	1822.2	425.45	1141.75	0	0	0	0	0	0	0	0	0	0	0	0	4274.3	0	5202.1	0	0	0	0
SUGT1	0	64.999	749.58	2280.1	164.17	389.46	5171.4	0	3996.5	3151.25	0	1165.2	0	1558.75	922.785	646.04	2778.9	1880.25	0	7199.05	5452.25	0	6591.3	16905.5	0	1060.67	1426.55	1183.31	464.62	1093.64	0	0	0	0	466.77	391.73	0	852.745	488.65	1147.41	645.45	1611.05	2493.45	408.89	7303.8	2086.15	264.54	962.18	865.33
SUPT6H	0	1131.65	618.295	0	1086.62	1342	0	0	0	1081.25	0	1146.55	1288	637.66	903.79	0	0	0	0	0	0	0	0	0	0	0	0	0	0	0	0	0	0	0	782.415	2112.25	0	0	0	0	0	0	0	0	0	0	0	0	0
SUPV3L1	0	470.32	1045.6	0	811.915	1179.2	0	0	0	0	0	0	1359.8	664.825	707.32	0	0	0	0	0	0	0	0	0	0	0	0	2111.15	1296.1	1465.7	0	0	0	0	804.055	982.935	0	0	0	0	0	0	0	0	0	0	0	0	0
SYMPK	0	2184.65	972.285	0	1144.15	599.44	0	0	0	0	0	0	0	0	0	0	0	0	0	0	0	0	0	0	0	0	0	1742.56	462.86	1648.2	0	0	0	0	1334.5	1031.02	0	1153.2	893.52	0	0	0	0	0	0	0	0	0	0
TALDO1	0	1381.85	1507.65	10700.6	4213	4975.15	32474	0	22861	12030	0	12393.5	97.184	3843.55	1598.5	2115	9284.8	3891.4	1089.6	30124	29126.5	1063.88	40223.5	47829	2470.75	3597.5	4539.4	11266.5	1086.65	6376.55	0	0	0	0	4823.55	4334.05	0	6771.4	9176.75	17624.5	3151.65	20814.5	39840.5	3445	40621.5	6209.55	404.55	2360.85	4085.2
TATDN1	0	6779.35	4853.95	163.58	3190.6	2802.55	0	0	0	0	0	0	0	0	0	0	0	0	0	0	0	0	0	0	0	0	0	0	0	0	0	0	0	0	4266	2253.4	0	3485.45	3422.45	0	0	0	0	0	0	0	0	0	0
TBC1D4	0	2856	2885.25	5748.15	1549.68	837.02	0	0	0	0	0	0	0	0	0	0	0	0	0	0	0	1754.8	7370.3	4295.3	0	0	0	0	0	0	0	0	0	0	0	0	2870.75	0	1949.2	0	0	0	3372.2	3329.1	1521.4	0	0	0	3260.7
TBCA	0	10378	7443.9	0	6515.5	5592.15	9471.95	0	3916.75	12414	0	11052.8	0	3586	2095.39	637.325	4574.25	1066.11	0	17585.5	14767.5	0	50377.5	33894.5	1473.55	1147.07	1505.76	8375.05	643.015	4384.15	0	17393.8	21074	0	7694.55	4755.25	0	28269	25214	5441.2	0	3169.4	14473.5	0	9717.7	910.28	805.43	987.82	708.73
TBL2	0	732.255	617.535	0	1033.83	744.975	0	0	0	0	0	0	0	0	0	0	0	0	0	0	0	0	316.155	327.765	0	0	0	4490.65	0	895.16	0	0	0	0	2951.55	1099.35	0	4999.8	3148.45	0	0	0	0	0	0	0	0	0	0
TELO2	0	1124	780.445	0	2318.6	744.465	0	0	0	0	0	0	0	0	0	0	0	0	0	0	0	0	0	0	0	0	0	0	0	0	0	0	0	0	3272.5	1500.5	0	2840.15	1978.35	0	0	0	0	0	0	0	0	0	0
TFAM	0	642.105	531.81	0	1510.6	2517.2	0	0	0	10211.5	0	7024.45	0	0	0	0	0	0	0	0	0	0	799.615	514.23	0	0	0	2719.45	0	874.695	0	0	0	0	7050.15	8779.4	0	19011.5	24448	4708.45	0	3368.9	1765.92	0	704.22	0	0	0	0
TFIP11	0	9225.55	4147.3	0	8853.2	7069.75	0	0	0	245.48	0	286.605	0	3150.1	1507.95	0	0	0	243.83	96.0375	159.51	381.25	205.97	183.305	865.185	484.86	325.75	425.955	5023.2	1652.82	0	0	0	0	5701.95	3377.5	470.9	8262.8	4907	0	0	0	78.433	0	121.008	550.25	337.465	303.81	0
TFRC	0	1871.8	965.675	0	2752.95	2940.8	0	0	0	708.405	0	1215.35	0	0	0	0	0	0	0	936.62	388.625	0	2142.4	1360.45	0	0	0	3072.05	145.83	922.785	0	0	0	0	6863.55	5613.5	0	4550.2	8809.8	8082.6	0	3855.95	9099.15	0	5681.65	0	0	0	0
TGOLN2	0	1258.5	541.415	0	0	0	0	0	0	0	0	0	0	0	0	0	0	0	0	0	0	0	0	0	0	0	0	0	0	0	0	0	0	0	1036.63	894.39	0	0	0	0	0	0	0	0	0	0	0	0	0
THUMPD1	0	752.115	521.57	0	1091.65	516.91	0	0	0	0	0	0	0	0	0	0	0	0	0	0	0	0	728.565	1359.54	0	0	0	0	0	0	0	0	0	0	991.965	608.89	0	1128.15	852.065	0	0	0	0	0	0	0	0	0	0
THYN1	0	1069.35	542.14	0	2129	767.005	0	0	0	832.43	0	302.135	0	0	0	0	0	0	0	0	0	0	0	0	0	0	0	6099.45	583.72	1749.07	0	0	0	0	702.09	537.95	0	1202.95	779.485	0	0	0	0	0	0	0	0	0	0
TICAM2	0	2996.9	2031.15	0	2844.65	2499	0	0	0	0	0	0	0	0	0	0	0	0	0	0	0	0	707.74	521.145	3008.55	426.7	0	4218.2	0	2057.35	0	0	0	0	4929.95	3689.2	0	4826	3286.45	527.215	0	480.265	2109.5	0	1000.79	0	0	0	0
TIMM44	0	5110.25	6220.45	395.41	1284.72	2789.65	0	0	0	2513.55	0	3199.05	3694.15	741.19	1247.39	1966.85	0	681.495	0	1152.32	1623.1	0	3944.15	5673.2	4700.1	3519.9	1115.35	0	0	0	0	0	0	1526.8	2709.4	5491.25	1748.85	5790.25	2688.55	1106.25	0	3711.2	5594	0	5314	4851.8	1762.65	2267.6	1967.65
TM9SF2	0	1166.05	884.625	0	2444.15	1243.15	0	0	0	0	0	0	0	0	0	0	0	0	0	0	0	0	0	0	0	0	0	2373.9	0	653.665	0	0	0	0	2097.4	1247.6	0	2468.4	2691.6	1012.53	0	726.275	0	0	0	0	0	0	0
TMCO1	0	6176.25	2651	0	7707.3	4777.3	0	0	0	2008.25	0	304.205	0	0	0	0	0	0	0	0	0	348.855	271.095	330.97	2466.25	731.445	0	4163.15	0	1947.9	0	0	0	0	8961.6	5002.95	770.24	8330.95	5497.45	2023.6	0	211.185	0	0	0	0	0	0	0
TMED10	0	12100	10973.4	517.845	14066.5	13460	5145.65	0	1699.35	6376.6	0	5683.8	0	0	0	0	0	0	5238.2	1488.1	1281.3	6227.8	4368.7	3653.95	8964.85	3984.45	609.02	16589.5	591.21	8293.75	0	0	0	0	14883	13058	993.2	10618	16163.5	11473.4	0	3879.2	7087.65	0	5398.25	0	0	0	0
TMED2	0	726.14	1012.75	0	728.93	1153.15	1018.09	538.23	932.48	1141.7	0	1565.4	0	0	0	0	0	0	0	590.415	495.26	0	1287	1332.94	4586.7	2256.75	0	6587.15	80.166	2742.1	0	0	0	0	2163.5	3480	0	2383.25	3555.75	1587.75	0	1609.7	3948.6	0	1216.1	0	0	0	0
TMED9	0	1189.85	2862.85	0	1369.85	4273.85	0	0	0	3704.45	0	820.01	0	0	0	0	0	0	521.19	486.7	473.76	0	0	0	5686.7	1530.8	0	8014.75	0	4225.5	0	0	0	0	1658.95	5676.75	0	0	0	1221.2	0	656.865	348.265	0	1889.75	0	0	0	0
TMEM205	0	2952.8	1237.85	0	4129.5	2349.7	0	0	0	0	0	0	0	0	0	0	0	0	0	0	0	0	0	0	0	0	0	5955.9	0	1263.8	0	0	0	0	5691.15	5007.55	0	5042.8	3967.6	0	0	0	0	0	0	0	0	0	0
TMEM245	0	1166.85	625.335	0	0	0	0	0	0	0	0	0	0	0	0	0	0	0	0	0	0	0	0	0	0	0	0	2460.1	0	440.25	0	0	0	0	1250.8	1159.2	0	1785.55	1072.91	0	0	0	0	0	0	0	0	0	0
TMEM41B	0	2681.35	901.46	0	3907.15	1540.4	0	0	0	0	0	0	0	0	0	0	0	0	0	0	0	0	0	0	0	0	0	0	0	0	0	0	0	0	4981.1	2131	0	4059.65	1954.2	0	0	0	0	0	0	0	0	0	0
TMEM43	0	5342.25	2411.05	0	5586.4	3486.5	0	0	0	345.91	0	346.65	0	0	0	0	0	0	0	0	0	0	0	0	770.085	474.1	0	2394.6	0	1230.55	0	0	0	0	8332.25	4147.6	452.84	4786.15	3357.6	0	0	0	0	0	0	0	0	0	0
TMSB10	0	13236	7614.45	5003.5	21426	19959.5	27328.5	1371.6	17592.5	22067.5	0	31598	5991.7	6805.05	6978.5	2692.8	25046	15545.5	0	45052.5	32129	13339	75297.5	57179.5	10460.5	11506.5	12877	10648.2	4982	10505.5	9525.45	9724.9	5609.5	0	15156	16210.5	0	33764.5	45443	19576	4619.2	13600.5	70349	10162.2	51985.5	7036.25	5335.25	7514.8	5886.05
TMSB4X	0	6400	4493.7	0	7977.2	6749.5	9599.85	0	5801.5	10721.5	0	10418	3402.9	3790.45	3957.2	0	9593.35	5379.75	0	14684.5	9783.25	0	38725.5	21482	5907.1	6708	5562.95	5874.15	0	5168.55	8124	11986.1	564.13	0	7951.55	5500	0	15884.5	17054.5	6075.55	0	4091.5	21882	0	15223.5	0	4526.25	3532.05	1605
TMX2	0	208.135	4146.65	433.385	643.515	1999.6	0	0	0	0	0	0	0	0	0	216.59	35.135	148.77	320.65	173.52	75.231	0	0	0	3299.85	1362.49	48.9185	6073.45	0	2370.95	0	0	0	0	1572.62	2453.55	490.68	1150.95	489.945	0	0	0	0	0	0	0	0	0	0
TNFAIP1	0	873.375	466.36	0	1191.05	783.145	464.39	2890.05	1066.1	0	0	0	1695.65	11113.5	9203.85	0	0	0	0	3101.25	1024.35	0	3254.8	1210.45	0	0	0	0	3158.3	389.9	0	0	0	0	1152.45	900.805	618.04	801.145	821.275	895.685	373.16	755.14	0	0	0	5010.75	1167.15	3867.85	5328.6
TNS3	0	667.21	890.335	959.77	1362.15	953.88	0	0	0	2749.15	0	1247.65	0	0	0	0	0	0	0	1802.05	1311.35	0	2087.6	2562.95	0	0	0	2950.5	0	2177.05	0	0	0	0	902.65	510.15	0	2147.55	1025.04	0	0	0	0	0	0	0	0	0	0
TPM1	0	760.35	426.335	0	434.775	316.85	14733.8	402.02	9334.25	15795.5	773.735	2399.8	388.67	2028.66	1470.1	430.73	3391.1	1470.51	0	6675.75	5798	0	9091.65	7146.4	0	1786.21	2813.25	571.33	1842.5	730.13	0	0	0	0	477.005	266.85	0	3264.75	1374.85	7055.7	0	5718.9	8411.45	316.48	6496.1	1131.1	671.55	947.765	1319.95
TPR	0	1388.8	605.6	0	698.495	602.38	0	0	0	422.58	0	637.395	0	0	0	0	0	0	0	6667.35	1756.75	0	2583.3	1072.5	956.32	1686.85	931.36	623.94	1070.6	668.025	0	0	0	0	1408.6	729.83	0	1561.96	829.785	0	0	0	0	0	0	0	0	0	0
TPRG1L	0	2340.1	2294.59	0	1180.75	543.24	0	0	0	0	0	0	0	0	0	0	0	0	0	0	0	0	0	0	0	0	0	0	0	0	0	0	0	0	3828.7	3843.15	0	0	0	0	0	0	0	0	0	0	0	0	0
TPT1	0	10440.9	6611.4	1363.2	12561.5	10488	17330	13951	13280	25570	1314.95	17615	0	5536.55	3515.35	2053.9	11333	4965.6	0	12484.5	11416	0	21439.5	18730.5	3436	3901.05	4889	65399	6206.55	36300.5	0	0	0	0	10851.5	8715.45	0	31648	18141.5	13845	0	10252.8	17576.5	0	18126	5078.15	7052.35	8690.55	8236.35
TRIM33	0	779.505	1375.25	0	0	0	0	0	0	0	0	0	681.63	1101.54	1170.5	898.15	1240.3	1227.15	0	0	0	0	0	0	356.12	922.135	1196.1	0	0	0	0	0	0	0	0	0	0	0	0	0	0	0	0	0	0	904.5	1442	892.92	0
TRIM44	0	4458.05	2502.35	0	3930.1	1497.15	0	0	0	0	0	0	0	0	0	0	0	0	0	0	0	0	0	0	0	0	0	3789	0	839.74	0	0	0	0	3512.5	1950.35	0	1592.25	1801.5	0	0	0	0	0	0	0	0	0	0
TRIP13	0	3447.85	1073.85	0	6046.9	3003.7	0	0	0	4093.4	0	1308.5	0	0	0	0	0	0	0	1127.14	1097.77	0	1485.6	2425.9	6667.65	1662.85	1614.85	1472.05	444.53	2061.2	0	0	0	0	4727.15	1217.05	5525.25	8596.5	4043.8	1953.75	0	1897.5	3013.9	0	857.895	0	0	0	0
TRIR	0	5646.6	3410.45	0	6318.9	3256.5	0	0	0	948.39	1123.8	981.085	0	1068.91	961.065	682.02	824.04	731.265	0	0	0	0	0	0	1762.8	1682.54	2089.7	16046.5	468.27	8077.9	0	0	0	0	4339.9	2308.45	0	3726.8	2228.7	0	0	0	0	0	0	492.97	581.33	529.27	0
TRMT6	0	838.655	1261.1	0	1044	1097.25	0	0	0	0	0	0	0	0	0	0	0	0	0	0	0	0	2970.15	1818.35	0	0	0	0	0	0	0	0	0	0	0	0	0	0	0	0	0	0	0	0	0	0	0	0	0
TRMT61A	0	1236.15	809.56	0	1070.75	1293.35	0	0	0	0	0	0	0	0	0	0	0	0	0	1199.05	757.185	0	2127.65	1452.55	0	0	0	0	0	0	0	0	0	0	795.9	1260.3	0	969.095	1062.71	0	0	0	1338.95	0	859.755	0	0	0	0
TSN	0	1063.57	887.225	0	4115.65	1484.65	0	0	0	7855.25	0	6210.4	0	2132.95	1438.6	2068.8	4323.75	1880.75	0	5119.7	2818.35	0	11328	10362.1	0	0	0	677.89	714.675	788.5	0	0	0	0	2879.9	1291.1	0	5063.4	2799.25	5757.45	0	3470.65	9381.85	0	6146	0	0	0	0
TTLL12	0	6246.55	3502.9	0	8894.6	4733.6	0	0	0	6873.2	0	4159.65	0	0	0	0	0	0	0	0	0	0	10218	4600	0	0	0	0	0	0	0	0	0	0	9210.55	5525.3	0	8863.35	6136.1	0	0	0	2835.1	0	4217.5	0	0	0	0
TUBAL3	0	7818.6	3645.95	0	0	0	0	0	0	0	0	0	0	0	0	0	0	0	0	0	0	0	0	0	0	0	0	5767.6	0	2815.85	0	0	0	0	0	0	0	0	0	0	0	0	0	0	0	0	0	0	0
UBA1	0	169.885	39.535	1948.1	408.725	109.189	6117.55	0	869.37	2141.7	0	1467.1	0	0	0	73.6615	1136.32	148.78	0	11635	7260.4	0	19710	19331	0	1607.05	1096.21	192.502	0	66.67	0	0	0	0	1176.09	968.05	0	1710.95	2918.15	6330.7	0	3134.3	12411	0	8534.65	1253.89	1264.9	105.18	0
UBA52	0	1468.2	528.07	0	947.955	764.2	0	0	0	1662.6	0	1728.9	0	0	0	0	0	0	0	0	0	2292.3	681.08	118.74	0	0	0	0	0	0	0	0	0	0	2269.3	2068.75	0	1469.95	1361.4	0	0	0	0	0	0	0	0	0	0
UBE2L3	0	1431.4	551.555	593.655	467.205	2074.35	3619.5	0	647.375	1049.03	0	2220.15	0	0	0	0	0	0	0	9031.95	5440.55	0	13675	14007	0	0	0	484.805	354.755	400.54	0	0	0	0	565.77	1775.1	0	1550	2928.35	1826.85	0	1212.8	11258	0	6099.65	0	0	0	0
UBE2M	0	1687.05	1145.5	3192.1	963.245	1425.9	8043.55	1223.5	5077.4	9049.85	0	1944.7	0	0	0	346.42	3078.9	842.97	0	6497	4811.7	0	5986.85	7767.15	695.94	1336.35	1645.6	12813	1116.37	7610.8	0	0	0	0	1474.7	517.44	0	3541	1900.15	1672.2	1462.1	5979.55	4675.95	785.83	7084.85	1981.8	962.785	1726.5	0
UBE2S	0	1813.05	1332.05	0	3181.75	2456.8	0	0	0	1474	0	1458.8	1637.75	479.605	643.28	1730.85	295.71	1471.65	0	0	0	0	1715.35	985.06	680.735	456.58	569.68	984.455	344.56	751	0	0	0	0	2214	1256.05	0	647.775	1604.15	1267.8	0	1119.65	3320.4	0	1512.8	0	4386.05	1936.1	0
UBXN4	0	4586.05	3323.35	0	0	0	0	0	0	0	0	0	0	0	0	0	0	0	0	0	0	0	0	0	0	0	0	0	0	0	0	0	0	0	5424.6	4114.45	0	0	0	0	0	0	0	0	0	0	0	0	0
UCK2	0	549.395	1059.65	0	0	0	0	0	0	0	0	0	0	0	0	830.245	648.4	548.03	0	0	0	0	809.07	1304.2	733.08	673.14	523	1740.6	0	1010.89	0	0	0	0	0	0	0	0	0	1670.15	0	1920.8	3529	0	3380	0	0	0	0
UFM1	0	1238.8	1051.8	0	0	0	0	0	0	0	0	0	0	0	0	0	0	0	0	1637.55	1255.35	0	2667.25	4398.2	0	0	0	4642.45	0	1460.1	0	0	0	0	535.255	1832.15	0	0	0	0	0	0	0	0	0	0	0	0	0
UGDH	0	274.27	517.745	1647.6	208.73	2717.85	14230.5	0	4282.25	1828.1	0	3270.25	0	0	0	233.026	2611.55	1571.67	0	19686.5	11481	0	15506	24196	60.64	541.4	1571.94	2302.45	301.585	1880.3	0	0	0	0	487.135	171.03	0	2642.75	1236.45	4675.4	0	5416.45	8717.75	0	13632.2	0	0	0	0
UGT1A6	0	2369.35	2393.2	0	2752.6	2358.8	0	0	0	0	0	0	0	0	0	0	0	0	0	0	0	0	0	0	0	0	0	0	0	0	0	0	0	0	0	0	0	0	0	0	0	0	0	0	0	0	0	0	0
UMPS	0	1050.24	780.465	0	920.185	692.795	0	0	0	0	0	0	0	0	0	0	0	0	0	0	0	0	767.53	1166.54	0	0	0	0	0	0	0	0	0	0	0	0	0	0	0	0	0	0	0	0	0	0	0	0	0
UNC45A	0	1375.3	909.235	0	1666.15	1249.1	0	0	0	764.23	0	2443	0	0	0	0	0	0	0	1038.9	730.85	0	2100.7	1855.5	0	0	0	2106.85	1240.75	1584.85	0	0	0	0	1763.3	2214.85	742.39	2456.95	1570.45	708.93	0	919.895	1651.9	0	1295.9	0	0	0	0
UQCC1	0	2462.1	1477.35	0	5110.2	1471.6	0	0	0	0	0	0	0	0	0	0	0	0	0	0	0	0	0	0	0	0	0	2435.75	417.21	2149.7	0	0	0	0	5035.1	2105.3	0	7745.3	5972.65	0	0	0	0	0	0	0	0	0	0
UQCC2	0	2936.8	5951.3	0	2012.25	2471.8	0	0	0	0	0	0	0	799.92	582.29	0	0	0	0	0	0	0	0	0	3311.7	1605.7	710.3	1589	870.36	2207.4	0	0	0	0	1491.85	1648.5	0	4812.85	1700.85	0	0	0	0	0	0	0	0	0	0
UQCRC1	0	542.475	156.948	0	4360.05	3312.65	2048.6	251.59	874.3	18557.5	0	8797.05	0	0	0	0	0	0	0	0	0	0	3335.85	1631.85	0	0	0	20346.5	101.054	9572.7	0	0	0	0	7567.4	4831.85	253.39	36078.5	25113	4634.8	0	2467.8	3387	0	1740.45	0	0	0	0
UQCRC2	0	3033.95	1843.1	0	10727.4	8902.2	2606.2	329.815	1785.35	16022.5	0	14169.5	0	0	0	0	0	0	0	773.71	281.51	0	3125.95	2436.4	807.4	556.34	461.92	47731	1291.05	23171.5	0	1167.9	739.55	0	11566	13028	0	22543.5	22187.5	6735.95	0	3494.4	3970.6	0	2561.2	0	0	0	0
UXS1	0	295.36	433.915	0	0	0	0	0	0	0	0	0	0	0	0	0	0	0	0	0	0	0	0	0	1096.91	164.821	0	0	0	0	0	0	0	0	140.76	319.385	0	305.545	222.985	0	0	0	0	0	0	0	0	0	0
VAPA	0	5637.15	1566.95	0	6741.8	5741.85	0	0	0	483.505	0	149.42	0	557.555	741.405	0	0	0	0	0	0	0	0	0	2282.65	1339.76	295.89	3844.35	542.62	1821.95	0	0	0	0	11039.1	3235.5	463.27	14964.5	8331	0	0	0	0	0	0	468.47	1016.3	972.23	0
VAT1	0	1899.25	4222.6	1920.75	3123.2	3769.95	9530.6	0	3384.95	5542.25	0	7389.7	0	1354.4	776.58	0	4652.95	1730.2	5171.95	7607.55	3898.05	3078.3	7718.45	6593.75	7742.15	3491.15	2169.45	10683	1118.6	6037.1	0	0	0	0	4423.35	5152.15	2787.95	5633.3	6811.95	8717.85	0	5739.9	9718.35	0	6366.85	2403.15	384.92	1518	0
VDAC1	0	7610.65	6534.1	0	20189	18843.5	9819.1	16003.5	17934	35476.5	0	56701.5	0	0	0	0	0	0	4219.65	5914.95	4682.5	2729.45	4021.1	6508.9	5555.6	3210.3	2058.7	177670	5779.4	95635.5	6875.6	8255.95	5605.35	0	51976	74396.5	0	75625.5	77487.5	59290.5	0	30562.5	14697.5	1464.75	17172	1123.6	3558.85	1769.95	0
VDAC2	0	1873.6	2671.95	0	7189.15	7012.3	2557.2	3195.4	2298.5	19505.5	0	23233	0	0	0	0	0	0	715.98	477.375	407.23	0	1893.45	1950.05	949.205	1146.9	575.295	58265	2081.8	26091	1833.2	3100.45	3248.1	0	26768	28608.5	0	42910	36367	12605.5	0	9807.7	4159.15	0	4833.7	303.88	2611.15	564.875	0
VKORC1	0	2189.25	3681.75	0	3586.75	2263.7	0	0	0	0	0	0	0	0	0	0	0	0	0	0	0	0	0	0	2869.75	1141.93	0	4814.9	0	2737.95	0	0	0	0	3462.55	2911.5	0	0	0	0	0	0	0	0	0	0	0	0	0
VTI1B	0	3013.95	1882.5	0	1936.4	1629.75	0	0	0	1098.75	0	1731.05	0	0	0	0	0	0	0	0	0	0	2645.95	1854.05	0	0	0	0	0	0	0	0	0	0	1725.85	1814.1	0	689.015	1659.9	0	0	0	0	0	0	0	0	0	0
WARS1	0	1726.9	899.025	809.08	1541.7	1795.3	0	0	0	1087.26	0	1342.13	0	2089.6	1402.1	720.24	1810.7	1434.65	0	2865	1734.7	0	6007.05	4317.35	0	0	0	0	1334.05	1401.6	0	0	0	0	2893.85	2147	0	2615.7	2775.4	3952.25	0	1820.8	4357.45	0	2658.25	0	0	0	0
WASL	0	2247.9	1823.65	0	423.48	930.67	0	0	0	0	0	0	0	0	0	0	0	0	0	0	0	0	0	0	0	0	0	0	0	0	0	0	0	0	1214.09	2233.1	581.5	546.53	890.26	0	0	0	0	0	0	0	0	0	0
WDR43	0	686.365	1199.59	0	0	0	0	0	0	0	0	0	0	0	0	0	0	0	0	0	0	0	0	0	0	0	0	2205.6	497.29	1736.35	0	0	0	0	0	0	0	0	0	0	0	0	0	0	0	0	0	0	0
XPO1	0	15556.5	9103.35	667.53	14020	10725	5861.45	0	1170.56	3892.35	0	3453.5	0	0	0	240.4	2176.95	854.48	0	4731.35	3559.5	0	10146.5	7681.65	7600.35	4471.25	1780.6	8973.9	446.4	5355.1	0	0	0	0	18201.5	14366	1389.8	12386.5	12831.5	8193.3	0	5157.65	9924.45	0	5646.1	0	0	0	0
XPO5	0	7021.15	3148.55	0	5866.45	1964.8	0	0	0	1173.75	5107.4	3732.85	0	0	0	0	0	0	0	1366.76	1379.41	0	4702.75	2934.05	2040.7	1529.4	892.885	4887.5	770.81	2677.55	0	0	0	0	9764.8	8950.55	0	11404.5	6630.15	1422.47	0	1092.57	2367.35	0	673.29	0	0	0	0
XRN2	0	2015.6	789.67	611.71	2865.2	1787.2	0	0	0	0	0	0	2569.05	498.34	1004.7	1179.75	1006.6	1301.55	1124.7	555.35	836.6	0	294.56	862.285	1206.49	1588.6	1195.75	606.995	606.42	567.85	0	2902.55	1334.4	0	1914.25	803.955	853.22	2853.85	1969.4	0	902.01	797.48	0	0	0	1207.8	1202.6	1366.85	0
XYLB	0	2021.7	1868.35	0	1621.05	1994.2	0	0	0	0	0	0	0	0	0	0	0	0	0	0	0	0	1795.1	1986.15	0	0	0	0	0	0	0	0	0	0	1904.55	1861.35	0	1495.8	1591.95	0	0	0	0	0	0	0	0	0	0
YBX3	0	7041.05	5365.9	0	8688.15	6275.25	4040.65	0	2317.65	4899.25	0	4234.1	793.4	3989.55	3302.45	2810.35	4442.7	2614	0	2307.75	1889.95	0	3124.5	1749.02	868.48	2139.45	2854.8	2375.5	3770.6	3358.1	0	0	0	0	6014.15	4415	0	3684.85	3025.6	2440.75	0	1643.6	2797.3	0	2656.95	1217	2059.15	1903.55	0
YTHDF2	0	5260	2682.8	0	3540.5	2668.35	1515.23	0	1704.15	2267.25	0	1438.4	0	0	0	0	0	0	0	0	0	0	679.45	460.735	0	0	0	589.655	756.52	892.385	0	0	0	0	4729.05	2615.4	0	4437.2	4113.15	1721.8	0	2461.3	1038.64	0	2101.05	0	0	0	0
YTHDF3	0	1910.15	2029.8	0	2631.15	2154.5	0	0	0	0	0	0	0	0	0	654.015	1402.1	0	0	0	0	0	0	0	2147	1467.1	1153	2009.73	1353.15	2586	0	0	0	0	2103.9	1335.2	0	1929.25	1289.89	0	0	0	0	0	0	0	0	0	0
ZC3HAV1	0	2192	954.635	0	2527	1205.4	0	0	0	3418.55	0	451.005	0	0	0	0	0	0	0	0	0	459.13	1684.25	289.18	0	0	0	714.045	261.4	532.87	0	0	0	0	2357.7	1067.16	582.74	2226.05	2393.05	0	0	0	0	0	0	0	0	0	0
ZCCHC10	0	1366.55	1544.35	0	0	0	0	0	0	0	0	0	0	0	0	0	0	0	0	0	0	0	0	0	0	0	0	0	0	0	0	0	0	0	0	0	0	0	0	0	0	0	0	0	0	0	0	0	0
ZFPL1	0	2332.55	1041.2	2286.45	1394.8	957.595	0	0	0	0	0	0	0	0	0	0	0	0	0	0	0	0	0	0	0	0	0	0	0	0	0	0	0	0	3472.6	1896.65	0	3194.2	2248.15	0	0	0	0	0	0	0	0	0	0
ZNF622	0	896.825	1597.95	0	2633.5	2234.4	0	0	0	3882.2	0	2347	0	0	0	0	0	0	0	0	0	0	0	0	0	0	0	1810.95	0	1832.7	0	0	0	0	890.05	369.495	0	0	0	0	0	0	1596.3	0	1349.45	0	0	0	0
AAAS	0	0	0	5917.8	0	8671.95	26331.5	0	144585	0	0	0	12410	22837.5	25625	5021.2	79618	44887	0	27180.5	98033	0	0	0	8425.6	41843.5	59609.5	16790.5	28439	19439.5	0	0	0	0	0	0	0	0	0	1882.55	6241.2	23400	0	0	0	0	0	0	53185
AAK1	0	0	0	1016.3	755.4	1010.64	0	0	0	0	0	0	0	0	0	0	0	0	0	0	0	0	0	0	0	0	0	1353.1	1344.5	1004.31	0	0	0	0	0	0	0	443.49	879.565	816.53	0	868.695	867.185	0	549.52	0	0	0	0
ABRACL	0	0	0	192.06	1305.1	420.045	0	0	0	3361.15	0	540.04	0	0	0	0	0	0	0	0	0	0	6735.35	4346.3	0	0	0	0	0	0	0	0	0	0	898.93	168.155	0	4074.1	2196.75	0	0	0	2346.8	0	1005.64	0	0	0	0
ACAD8	0	0	0	615.18	582.2	1063.18	2875.7	0	1389.8	0	0	0	0	1597.8	918.8	0	0	0	0	0	0	0	1603.95	1348.92	1416.4	1422.1	2018.85	996.32	2328.2	1492.4	0	0	0	0	0	0	977.76	682.19	941.23	2435.55	0	3608.85	3067.15	0	3125.4	0	0	0	0
ACAP2	0	0	0	44496	66722.5	55083	0	0	0	0	0	0	82923	53134.5	56543.5	54179	64867.5	56851	0	0	0	0	0	0	68722.5	63958.5	61753	0	0	0	0	0	0	54846	54508	60912	83468.5	47049.5	44909.5	0	0	0	0	0	0	0	0	0	64188
ACO2	0	0	0	1821	986.05	610.415	0	0	0	2330.3	0	2364.9	0	580.495	1102.4	1316	596.85	1722	0	4037.05	695.695	0	6449.9	8194.1	3020.2	3351.34	1276.65	0	0	0	0	0	0	0	2968.75	818.635	2990.9	4095.55	2520.2	4671.8	0	2167.85	10820.5	0	4918.45	1187.85	542.06	151.56	0
ACP1	0	0	0	2476.8	1008.8	204.05	0	0	0	2191.15	0	1683.45	0	0	0	0	0	0	0	7645.85	3667.66	0	7502.25	10934.5	0	0	0	0	0	0	0	0	0	0	0	0	0	4803.65	1062.62	1159.17	0	5012.3	2776.15	0	4570.65	0	0	0	0
ADD1	0	0	0	1351.9	1149.03	2011.05	0	0	0	4106.9	0	4261.2	0	0	0	0	0	0	0	5587.1	3756.5	0	9347.65	5123	0	0	0	4678.55	0	2326.5	0	0	0	0	2322.7	983.695	0	5050.1	3347.25	0	0	0	2638.5	0	1778.85	0	0	0	0
ALDH7A1	0	0	0	1251.15	779.61	299.685	8765.9	0	4134.6	3658.65	0	729.88	0	0	0	452.75	2142	848.38	0	9922.2	9073.05	0	17528.5	12303.5	0	492.085	653.625	915.75	216.1	640.59	0	0	0	0	0	0	0	2198.35	1923.1	6218.55	0	4054.65	4555.7	0	11621	0	0	0	0
API5	0	0	0	8106.2	15424.5	13260	0	0	0	0	0	0	0	0	0	9113.95	12516	10347	0	0	0	0	0	0	16305.5	12643.5	12243.5	38374.5	9707.65	25627.5	0	0	0	0	0	0	7742.25	13181.5	9184.2	0	0	0	0	0	0	0	0	0	0
ARPC4	0	0	0	21269.5	30793.5	21224.5	21520.5	23913	19843.5	145885	30032.5	86426	32809	31366.5	28859	30017	57327.5	41851.5	13082.5	39530.5	38120.5	10014.5	42499.5	21336	11193.5	34511.5	46987	11130	45861	32275	44239	45197.5	52141.5	22758.5	62031	22672	26409.5	43111.5	28556.5	39800.5	40237.5	30290	54494	33912.5	45479	44338.5	34583.5	35404	49765
ATAD3A	0	0	0	1173.75	797.505	426.045	2837.95	0	2123.7	2607.85	0	2226.4	901.33	1425	1385	1272.5	1814.7	1723.6	0	4002.3	2254.8	0	0	0	880.815	1685.45	231.36	54852.5	1714.6	5182.35	0	0	0	0	12002.5	3631.45	651	27729.5	16641.5	666.43	0	8198.1	1640.45	610.2	3353.9	0	0	0	0
ATP1A1	0	0	0	6215.6	26348.5	19746.5	0	0	0	0	0	0	0	0	0	0	0	0	12244	29395	26022.5	18298.5	33565.5	28498.5	0	0	0	46634	1867.75	20322	0	0	0	1834.75	34942.5	31074.5	4499.7	30791.5	41234.5	38775	293.67	28052.5	30855	558.235	21222.5	0	0	0	0
ATP5PD	0	0	0	149.62	9317.45	5490.05	423.845	495.49	690.205	18785	0	17922.5	0	1045.06	770.115	0	0	0	0	842.44	895.925	0	3373.3	1812.4	259.545	144.399	116.225	125570	627.645	45812	0	0	0	0	13542	5292.55	213.93	48759	60393	3948.25	0	739.01	864.635	0	314.51	662.31	741.505	538.6	288.415
ATP6V1C1	0	0	0	2806.5	973.57	459.77	0	0	0	6839.2	0	3859.05	0	0	0	0	0	0	0	0	0	0	0	0	0	0	0	0	0	0	0	0	0	0	2260.05	837.99	0	1484.55	2259.2	0	0	0	0	0	0	0	0	0	0
BCAP31	0	0	0	812.284	13936	12570.5	0	0	0	13204	0	7406.8	0	0	0	0	0	0	0	0	0	0	5242.65	5413.2	0	0	0	0	0	0	0	0	0	2829.5	15623	15530	1998.22	18728.5	12599	0	0	0	0	0	0	0	0	0	0
CFL1	0	0	0	172610	80865	104220	223135	117780	141710	183005	123260	284685	0	0	0	63104	204185	112450	43924	284930	236580	57093	365825	278625	45770	102835	150730	33920.5	130590	87124.5	0	0	0	0	0	0	0	0	0	231870	184250	168610	260435	81975.5	239360	169645	33752.5	89637.5	156790
COTL1	0	0	0	3796.4	1430.15	1066.69	5501.35	0	2596.4	19995.5	0	13780	0	0	0	0	1748.1	1086.5	0	2363	1990.65	0	4098.1	3870.55	4192	1228.3	2269.1	0	0	0	0	0	0	0	1385.95	833.79	0	4686.6	2144.45	2673.05	0	1781.45	19997.5	0	6772.55	0	0	0	0
CTNNA2	0	0	0	1025.8	3877.5	1391.25	0	0	0	0	0	0	0	0	0	0	0	0	0	2653.65	3992.95	0	4201.25	1836.65	0	0	0	789.725	1384.8	2535.55	0	0	0	0	0	0	0	0	0	1249.28	0	1280.19	0	0	0	0	0	0	0
DCDC2	0	0	0	2148.75	2104.8	859.97	0	0	0	3672.85	0	2399.15	2526.45	2366.65	3483.65	2585.1	1522.7	2451.65	0	0	0	0	0	0	3152.45	2231.8	3427.3	6848.15	2532.95	3438.9	0	0	0	3096.2	4211.75	1986.6	2933.6	2928.6	3869.25	0	0	0	0	0	0	3490.8	3298.05	2822	1162.7
FDPS	0	0	0	465.03	524.015	2704.6	8889.95	0	6228.55	4364.05	0	927.97	0	0	0	342.535	1160.55	509.95	0	11346	8635.2	0	17676.5	23404	0	0	0	1019.9	114.7	377.755	0	0	0	0	1497.55	3727.4	0	3455.9	1298	5462.15	170.46	7590.3	15622.5	492.54	8274.8	695.49	0	286.21	0
GDI2	0	0	0	25943.5	24387	23844.5	51245	7223.85	33029	51944.5	7389.65	40187	0	0	0	0	0	0	14469	53057	50233	10082.9	85562	68610	0	0	0	0	0	0	0	0	0	0	0	0	0	0	0	41918	18628.5	31345.5	55464.5	10851.8	50560.5	0	0	0	0
HADH	0	0	0	3733.3	24553.5	29112	0	0	0	0	0	0	0	0	0	0	0	0	0	0	0	0	0	0	0	0	0	0	0	0	0	0	0	0	0	0	0	0	0	0	0	0	0	0	0	0	0	0	0
HDHD5	0	0	0	7602.65	853.36	1163.65	4443.75	10964.5	3623.75	5114.25	10437.5	3234.55	10174.6	1551.9	5363.7	7147.7	10761.5	9530	0	5300.75	2621.15	0	9912.35	5497.2	6917.6	8463.8	10209.5	1344.3	5864.15	1822.22	0	0	0	0	1876.4	1917.4	0	2541.4	2543	6313.35	8473.2	4399.8	10179.7	0	3019.7	0	0	0	10345.5
HSD17B10	0	0	0	9317.85	41885	24863	0	0	0	0	0	0	0	0	0	0	0	0	0	0	0	0	0	0	0	0	0	0	0	0	0	0	0	0	0	0	0	0	0	0	0	0	0	0	0	0	0	0	0
HSP90B1	0	0	0	34011	38978.5	34177	0	0	0	0	0	0	0	0	0	0	0	0	18256	50812	40502	18821	77588.5	65641.5	0	0	0	0	0	0	0	0	0	0	0	0	0	0	0	44533	31504	31856.5	58900	25232.5	52476	0	0	0	0
HSPA5	0	0	0	49195.5	66622.5	61188.5	79952.5	39100	59376	95254	52356.5	82303	0	0	0	51289.5	71646	62233.5	27235	85449.5	70159.5	27934	116015	103905	37510	53459.5	65254	0	0	0	0	0	0	0	0	0	23540.5	91297.5	73205.5	94181	54751.5	78470	116440	48822	97583	74340	39841.5	59249	63086
HSPA8	0	0	0	97205.5	126115	104915	158765	56098.5	125020	136130	62658	117015	0	0	0	79340.5	116275	102035	64135	141585	130460	69848	149050	156625	74627.5	89921.5	95873.5	0	0	0	0	0	0	0	0	0	65084	199540	102900	171380	88459.5	154770	172750	82164	178325	0	0	0	0
HSPD1	0	0	0	59748	48054	50156	67186.5	28905.5	43176.5	67358	25544.5	54335.5	0	0	0	0	0	0	0	0	0	41260.5	74885	63520	0	0	0	0	0	0	0	0	0	0	0	0	10581.2	112545	120215	97275.5	58548	66229.5	111110	21752.5	84585	0	0	0	0
IDI1	0	0	0	219.03	417.48	730.63	4773.7	0	948.745	1949.8	0	2798.9	0	559.71	104.823	0	0	0	0	5746.25	3029.45	0	16315	14605	0	0	0	0	0	0	0	0	0	0	582.18	615.605	0	2593.2	1356.15	2540.25	0	1782.5	9662.1	0	5270.9	0	0	0	0
IQGAP2	0	0	0	11690	7089.9	6875.1	101255	11425	64424	65633.5	8121	78922.5	8686.75	13939.5	12466	6772.7	7891.85	7754.35	5567.85	26399	21382	10566.6	20001	20389.5	23509	18817	13542	12059	15800	15089.5	0	0	0	20018.5	6629.35	6769.7	27034	4759.4	8445.15	76651	1255.25	60742.5	66446.5	17042	67388	8486.05	6501.9	7427.25	8845.2
JUP	0	0	0	190.349	9046.55	7238.4	0	0	0	0	0	0	0	0	0	0	0	0	0	14557.5	9969.8	0	10209.4	13768.5	0	0	0	63504.5	4367.3	23103.5	0	0	0	508.34	11731.5	10747.4	343.68	16757	14349.5	4594.1	0	4638.6	3814.3	0	3243.5	3552.8	5856.35	4002.8	0
KIAA1217	0	0	0	1116.5	1349.45	1142.4	0	0	0	3789.3	0	1146.42	0	2228.15	1594.95	1015.55	2090.5	1315.57	0	1619.78	810.205	0	3473	916.505	0	0	0	3116.1	1098.76	1475.15	0	0	0	0	3530.55	778.565	949.01	7013.45	2674.35	2575.7	0	1386.94	1398.85	0	1727	0	0	0	0
MRPL44	0	0	0	615.24	801.775	169.97	0	0	0	0	0	0	0	0	0	0	0	0	0	0	0	0	0	0	0	0	0	2194.9	0	1211.25	0	0	0	0	2414.65	915.315	0	7468.35	5313.25	0	0	0	0	0	0	0	0	0	0
NDUFS1	0	0	0	1046.52	798.49	496.95	0	0	0	2004.65	0	854.44	0	0	0	0	0	0	0	0	0	0	198.03	162.335	0	0	0	19949	0	2394.25	0	0	0	0	1814.65	1789.9	0	2723.3	8061.5	0	0	0	0	0	0	0	0	0	0
NPLOC4	0	0	0	1241.2	3276.85	1580.05	0	0	0	0	0	0	0	3567.4	2762.95	668.3	2675.5	1305.6	0	1429.65	484.28	0	4451.15	1612.1	0	0	0	704.595	3190.4	2039.95	0	0	0	0	3577.65	1480.85	0	3780.3	3775.85	2114.1	0	1261.2	1790.35	0	1337.55	3259	764.7	1364.4	0
PGAM5	0	0	0	693.71	1615.92	732.84	0	0	0	4006.5	0	3736.3	0	0	0	0	0	0	0	0	0	0	0	0	0	0	0	6286.6	173.11	2495.7	0	0	0	0	4239.1	2314.4	0	9218.4	5532.5	528.005	0	706.245	0	0	0	0	0	0	0
PICALM	0	0	0	5698.3	14570	11752.5	0	0	0	0	0	0	0	0	0	0	0	0	0	0	0	0	0	0	0	0	0	14747.5	6221.1	11125	0	0	0	6053.6	15654	9547.75	7641.05	10740	10944	0	0	0	0	0	0	0	0	0	0
PLIN3	0	0	0	555.595	302.035	258.12	9821.25	0	2290.65	1885.15	0	1459.85	0	0	0	0	644.805	325.935	0	10847.5	6668.05	0	11461.1	17455	180.38	157.89	991.12	1204.92	0	539.105	0	0	0	0	1598	688.95	0	1930.75	3740.4	3725.8	0	2975.2	10077.2	0	8560.3	0	0	0	0
POLR1C	0	0	0	928.6	1621.15	634.955	0	0	0	1463.35	0	1611.6	0	0	0	1130.3	1350.05	1274.7	0	0	0	0	2572.85	1660.3	1999.35	1562	2819.1	0	2004.3	1008.57	0	0	0	0	0	0	0	1599.3	1327.4	0	0	0	0	0	0	0	0	0	0
PPP1R9A	0	0	0	5307.65	0	3829.3	0	0	0	6131.3	7082.5	6452	0	0	0	0	0	0	0	4078.55	1176.3	0	0	0	8782.15	4794.2	1987.9	0	0	0	0	0	0	8654.2	3837.2	8964.8	3122.7	6588	8741.5	2764.75	5593.7	0	0	0	0	0	0	0	0
PRDX5	0	0	0	8631.3	0	1656.05	9079.45	0	5079.05	0	0	0	0	1347.64	1539.35	1580.1	10288.6	7191.3	0	10915	15302	0	529.07	18925	2203.6	2235.05	4090.7	7346.9	1012.54	3556.7	0	0	0	0	0	0	0	0	0	1346.4	2803.15	1680.15	736.825	0	12850.5	7478.15	982.82	3088	4163.05
S100A10	0	0	0	4001.65	46624	34307	0	0	0	0	0	0	0	0	0	0	0	0	0	37914.5	29134.5	0	44942	18715.5	0	0	0	0	0	0	0	0	0	798.23	39223.5	25126	2265	133345	98659.5	0	0	0	0	0	0	0	0	0	0
S100A11	0	0	0	2935.1	1472.9	1337.25	0	0	0	0	0	0	0	0	0	0	0	0	0	2801	3904.65	0	3314	4657.85	0	0	0	0	0	0	0	0	0	0	2180.15	1525.4	0	2391.5	3042.8	0	0	0	1150.14	0	1442.76	0	0	0	0
S100A9	0	0	0	282.545	3865.3	3658.2	0	0	0	0	0	0	0	0	0	0	0	0	0	0	0	0	0	0	0	0	0	0	0	0	0	0	0	0	0	0	0	0	0	0	0	0	0	0	0	0	0	0	0
SEPHS1	0	0	0	5939.1	2276.4	1506.45	3452.5	1541.2	2508.4	3200.25	2185.6	2106.95	0	11835.5	6226.9	0	9946.45	3359.65	0	5996.75	5213.4	0	6354.15	6700.45	1577.2	5416.4	12504.5	3527.35	10390.1	7643.9	0	0	0	0	0	0	3723.75	1828.5	1135.5	0	0	0	5228.1	2352.8	4072.85	7794.5	0	2367.85	8056.7
SEPTIN7	0	0	0	647.14	2807.65	1524.15	0	0	0	5569.45	0	2167.65	0	0	0	0	0	0	0	0	0	0	1784.83	2306.2	0	0	0	0	2718.85	1745.7	0	0	0	0	12136.5	7518.75	0	26726	17631	0	0	0	0	0	0	0	0	0	0
SERPINB1	0	0	0	391.92	442.06	739.5	5939.3	0	986.5	389.085	0	1402.55	0	0	0	0	0	0	0	4891.85	2720.1	0	8601.3	9422	0	0	0	1179.65	104.39	668.48	0	0	0	0	836.115	487.25	0	868.95	1576.95	3978.5	0	2936.65	8671.4	0	6378.9	0	0	0	0
SERPINH1	0	0	0	54411.5	49944	53220	0	0	0	61832.5	29074	55474	0	0	0	0	0	0	27211.5	61249	53370	32996	84514	66327.5	0	0	0	0	0	0	0	0	0	41371	71188	62142	45069.5	47577.5	71784	67294.5	23258	48363	79351	22029.5	61841	0	0	0	0
SHMT1	0	0	0	4612.4	6844.65	5310.5	0	0	0	0	0	0	0	0	0	0	0	0	0	0	0	0	0	0	0	0	0	0	0	0	0	0	0	0	0	0	0	0	0	0	0	0	0	0	0	0	0	0	0
SHMT2	0	0	0	17604.5	41447	44930	0	0	0	0	0	0	0	0	0	0	0	0	0	0	0	0	0	0	0	0	0	0	0	0	0	0	0	0	0	0	0	0	0	0	0	0	0	0	0	0	0	0	0
SNRPB	0	0	0	152280	219575	160975	0	0	0	123600	190000	105206	213505	158980	152000	194090	189965	156360	0	0	0	0	0	0	0	0	0	0	0	0	307535	212015	203045	219790	201920	113795	208180	164440	190245	0	0	0	0	0	0	0	0	0	161270
SPEF2	0	0	0	1245.1	939.52	2039	0	0	0	0	0	0	0	0	0	2517.9	4180.3	4209.3	0	0	0	0	0	0	0	0	0	0	0	0	0	0	0	0	0	0	0	1762.55	2009.3	0	0	0	1609.85	0	1048.2	0	0	0	0
TIMM50	0	0	0	357.79	776.105	481.26	0	0	0	2503.75	0	1941.45	0	0	0	0	0	0	0	0	0	0	0	0	0	0	0	6193.15	546.45	3151.55	0	0	0	0	1966.65	917.62	0	8266.35	6638.3	0	0	0	0	0	0	0	0	0	0
TPX2	0	0	0	188.23	136.3	97.1535	0	0	0	0	0	0	0	0	0	0	0	0	0	0	0	0	0	0	230.485	532.94	1908.1	34728.5	1571.75	11837	0	0	0	114.85	283.008	88.4545	456.595	124.47	73.319	0	0	0	0	0	0	0	0	0	0
USP9X	0	0	0	1480.9	4468.3	2041.9	0	0	0	0	0	0	2089.25	3555.55	3387.3	2623.35	2011.65	2348.2	0	3329.75	1939.2	0	5907.2	4559.3	1901.05	3348.3	4292.3	2237.75	3992.7	3054.2	0	0	0	0	0	0	0	0	0	0	0	0	0	0	0	0	0	0	0
VPS8	0	0	0	338.43	1478	3445.75	0	0	0	0	0	0	1264.6	1053	1055.6	0	0	0	0	0	0	0	0	0	0	0	0	0	2038.65	882.535	0	0	0	0	0	0	0	0	0	0	0	0	0	0	0	0	0	0	0
WASHC4	0	0	0	955.43	1013.17	635.555	0	0	0	0	0	0	1326.3	1488.85	1019.26	700.655	0	745.1	0	0	0	0	756.605	502.76	0	940.835	1298.02	0	787.23	487.33	0	0	0	0	1024.94	779.345	594.43	1130.55	952.395	0	0	0	0	0	0	774.98	1834.25	1681.3	0
YWHAH	0	0	0	10414.5	23651.5	19086	20563	6449.45	17124.5	24539.5	5400.25	24193.5	0	0	0	0	0	0	12767	11879	12062.5	10956.5	17891.5	15699	0	0	0	0	0	0	0	0	0	0	0	0	5120	26918	15640	19346.5	5808.3	13781	21401.5	4367.2	17987	0	0	0	0
ABI1	0	0	0	0	2265.4	3901.85	0	0	0	0	0	0	0	0	0	0	0	0	0	0	0	0	0	0	0	0	0	0	0	0	0	0	0	0	1970.6	1905.95	0	0	0	0	0	0	0	0	0	0	0	0	0
ACOT8	0	0	0	0	1810.45	1711.3	0	0	0	0	0	0	0	0	0	0	0	0	0	0	0	0	0	0	0	0	0	0	0	0	0	0	0	0	2488.75	2110.45	0	1391.95	1837.9	0	0	0	0	0	0	0	0	0	0
ACTA2	0	0	0	0	3504.65	1954.1	0	0	0	5230.75	0	9347.2	0	0	0	0	0	0	0	0	0	0	5413.7	3747.6	0	0	0	0	0	0	0	0	0	0	4590	1975.25	0	1895.4	2717.45	22343	0	13315	9673.75	0	8338.7	0	0	0	0
AGFG2	0	0	0	0	997.655	770.595	0	0	0	0	0	0	0	0	0	0	0	0	0	0	0	0	0	0	0	0	0	1516.1	771.405	541.16	0	0	0	0	0	0	0	0	0	0	0	0	0	0	0	0	0	0	0
AIFM1	0	0	0	0	1202.05	1821.55	0	0	0	0	0	0	0	0	0	0	0	0	0	0	0	0	180.35	216.055	2147.1	1414.4	549.87	24856.5	892.345	8211.5	0	0	0	0	462.25	4797.45	0	3231.2	6065.8	2654.9	0	207.425	0	0	0	0	0	0	0
AKAP2	0	0	0	0	5738.9	4055.5	10265.9	0	4362.35	22909.5	0	17301	0	1187.36	216.185	0	0	0	0	20870	16682	0	13763	11984	0	249.545	597.63	2853.75	4181.75	3721.9	0	0	0	0	3261.5	2800.9	0	11748.5	10732.5	24002.5	0	10601.8	18248	0	13500	2271.4	0	399.935	0
AKR1C1	0	0	0	0	293.705	336.525	0	0	0	0	0	0	0	0	0	0	0	0	0	0	0	0	6050.25	3093.1	0	0	0	0	0	0	0	0	0	0	0	0	0	908.41	1224.45	503.02	0	482.015	2081.9	0	741.475	0	0	0	0
ALDH1A1	0	0	0	0	535.685	302.085	12033.2	0	2043.45	3690.65	0	7632.8	0	0	0	12117	453.53	11830	0	41284	27491.5	0	78711	74484.5	0	0	0	0	0	0	0	0	0	0	751.725	600.46	16547	4469.4	6954.65	10728.6	0	4452.4	21152	0	15046	0	0	0	0
ALDH2	0	0	0	0	649.105	699.225	6281.4	0	1094.34	2065.95	0	1479.3	0	0	0	0	0	0	0	5209.7	1495.15	0	9833.6	9614.8	0	0	0	0	0	0	0	0	0	0	954.195	1348.3	0	3327.55	3902.6	4139.15	0	5242.05	11060	0	6513.25	0	0	0	0
ALG9	0	0	0	0	1726.8	883.5	0	0	0	0	0	0	0	0	0	0	0	0	0	0	0	0	0	0	0	0	0	0	0	0	0	0	0	0	1516.5	1719.4	0	0	0	0	0	0	0	0	0	0	0	0	0
AMD1	0	0	0	0	2806.65	1786.2	0	0	0	4298.15	0	2470.7	0	0	0	0	0	0	0	0	0	0	0	0	0	0	0	0	0	0	0	0	0	0	0	0	0	0	0	2095.05	0	1160.94	0	0	0	0	0	0	0
ANAPC7	0	0	0	0	1007.63	922.69	0	0	0	0	0	0	0	0	0	0	0	0	0	0	0	0	0	0	0	0	0	921.96	652.72	793.66	0	0	0	0	0	0	876.42	787.875	866.995	0	0	0	0	0	0	0	0	0	0
ANLN	0	0	0	0	7425.65	8935.05	0	0	0	0	0	0	0	0	0	0	0	0	0	0	0	0	0	0	0	0	0	0	0	0	0	0	0	0	2684.3	4958.1	0	0	0	0	0	0	0	0	0	0	0	0	0
ANXA13	0	0	0	0	4652.8	2937.75	0	0	0	1429.95	0	1760.65	0	0	0	0	0	0	0	0	0	0	0	0	0	0	0	0	0	0	0	0	0	0	3645.9	1448.65	0	6357.9	4074.95	0	0	0	0	0	0	0	0	0	0
ARFGEF2	0	0	0	0	12869	4284.05	0	0	0	0	0	0	0	0	0	0	0	0	0	0	0	0	5420.1	3700.03	0	0	0	0	0	0	0	0	0	8173.25	9972.45	12031.5	6276.65	8166.35	9765.65	4265	8363.6	7032.7	5120.2	7173.9	7878.2	6303.05	2117.35	4178.95	8460.2
ARHGAP8	0	0	0	0	1403.8	983.75	0	0	0	0	0	0	0	0	0	0	0	0	0	0	0	0	0	0	0	0	0	0	0	0	0	0	0	0	0	0	0	0	0	0	0	0	0	0	0	0	0	0	0
ATL3	0	0	0	0	2709.9	2195.4	0	0	0	3833.45	0	3070.05	0	0	0	0	0	0	0	2431.8	1259.6	0	6707.55	3763.45	0	0	0	1409.5	75.053	1013.1	0	0	0	0	3602.25	2597.05	0	2452.45	4322.85	6245	0	2924.5	7914.5	0	4141.4	0	0	0	0
ATP5MF	0	0	0	0	973.64	807.405	0	0	0	4546.6	0	7577.4	0	0	0	0	0	0	0	0	0	0	0	0	0	0	0	9220	0	3497.9	0	0	0	0	3181.7	3770	0	2165.6	8944.65	5089.45	0	2436.85	1929.9	0	571.775	0	0	0	0
ATP5MK	0	0	0	0	118.578	490.25	0	0	0	2962.75	0	3466.75	0	0	0	0	0	0	0	0	0	0	0	0	0	0	0	11247	0	5856.2	0	0	0	0	2000.25	8933.55	0	8256.4	2586.5	5337.55	0	4688.85	1250.92	0	527.91	0	0	0	0
ATP5PB	0	0	0	0	3902.6	2311.75	237.83	831.635	649.665	18044.5	0	11640.5	0	0	0	0	0	0	0	0	0	0	805.32	1162.95	0	0	0	11699	240.39	6135.75	0	0	0	0	15305.5	11034	0	35935	25988	3235	0	2227.7	1311.19	0	382.465	0	0	0	0
ATP6V0A1	0	0	0	0	1270.81	592.605	0	0	0	0	0	0	0	0	0	0	0	0	0	0	0	0	0	0	0	0	0	0	0	0	0	0	0	0	2803.9	1280.1	0	0	0	0	0	0	0	0	0	0	0	0	0
ATP6V1H	0	0	0	0	586.045	263.55	0	0	0	0	0	0	0	845.655	330.09	0	0	0	0	0	0	402.98	1187.5	935.615	0	0	0	0	0	0	0	0	0	0	1532.6	732.44	0	2427.6	1324.95	864.055	0	667.5	0	0	0	0	0	0	0
BTF3L4	0	0	0	0	1600.15	870.15	0	0	0	0	0	0	0	0	0	0	0	0	0	0	0	0	4120.8	2809.9	0	0	0	0	0	0	0	0	0	0	0	0	0	3384.3	3453.5	3819.8	0	835.34	3703.65	0	845.595	0	0	0	0
C11orf58	0	0	0	0	781.225	1523.1	0	0	0	0	0	0	0	0	0	0	0	0	0	3731.35	3619.15	0	5493.7	6193.95	0	0	0	0	0	0	0	0	0	0	0	0	0	3807.85	2137.65	0	0	0	0	0	0	0	0	0	0
C3orf56	0	0	0	0	2985.7	1523.85	0	0	0	0	0	0	0	0	0	0	0	0	0	0	0	0	0	0	0	0	0	0	0	0	0	0	0	0	0	0	0	3224.3	2373.9	0	0	0	0	0	0	0	0	0	0
C6orf132	0	0	0	0	776.305	358.235	0	0	0	2033.14	0	1794.04	0	0	0	0	0	0	0	0	0	0	0	0	0	0	0	2131.35	0	1799.85	0	0	0	0	0	0	0	451.835	475.34	0	0	0	0	0	0	0	0	0	0
CARM1	0	0	0	0	1586.7	1066.75	3602.95	0	1415.15	7466.95	0	2255.7	0	0	0	0	0	0	0	2572.85	2306.95	0	7843.85	7618.05	0	0	0	0	0	0	0	0	0	0	2307.5	778.6	0	5597.1	3089.5	5815.35	0	3915.6	7929.35	0	5684.9	0	0	0	0
CCNH	0	0	0	0	2982.95	1415.7	0	0	0	0	0	0	0	0	0	0	0	0	0	0	0	0	0	0	0	0	0	0	0	0	0	0	0	0	1398	993.72	0	0	0	0	0	0	0	0	0	0	0	0	0
CDH1	0	0	0	0	2928.65	1668.55	0	0	0	7325.5	0	4273.35	0	0	0	0	0	0	0	8183.95	4567.85	0	13077	8226.95	0	0	0	5413.55	0	3719.25	0	0	0	0	3357.9	1548.25	0	8027.15	8373.5	0	0	0	0	0	0	0	0	0	0
CFAP43	0	0	0	0	11418	6271.35	0	0	0	13845	0	9499.1	0	0	0	0	0	0	0	0	0	0	0	0	0	0	0	0	0	0	0	0	0	0	24346.5	10777.2	0	28079.5	24834.5	15562	0	2658	6474.2	0	1320.95	0	0	0	0
CHCHD3	0	0	0	0	2329.1	2070.1	0	0	0	1064.1	0	5207.55	0	0	0	0	0	0	0	0	0	0	317.34	112.241	0	0	0	3715.5	0	1917.6	0	0	0	0	9085.55	5739.95	0	16679.5	14493	2744.65	0	977.12	428.195	0	205.83	0	0	0	0
CHTOP	0	0	0	0	912.58	498.42	0	0	0	0	0	0	0	0	0	0	0	0	0	0	0	0	0	0	0	0	0	22976	944.12	10985.5	0	1039.56	1840.1	0	0	0	0	0	0	0	0	0	0	0	0	485.22	1948.05	1654.25	0
CLIC4	0	0	0	0	1678.8	967.775	0	0	0	6170.6	0	2327.78	0	0	0	0	0	0	0	3330.25	1584.88	0	6902.5	4458.45	0	0	0	0	0	0	0	0	0	0	2226.55	1017.61	0	0	0	2147.25	0	951.99	4363.3	0	1725.35	0	0	0	0
CLPTM1L	0	0	0	0	1460.3	985.06	0	0	0	0	0	0	0	0	0	0	0	0	0	0	0	0	0	0	0	0	0	0	0	0	0	0	0	0	1869.4	1169.69	0	539.5	1079.25	0	0	0	0	0	0	0	0	0	0
COPS3	0	0	0	0	765.58	763.845	741.325	1064.1	0	0	0	0	0	0	0	0	0	0	0	0	0	0	4558.9	3340.85	0	0	0	0	0	0	0	0	0	0	0	0	1086.6	1397.75	811.005	0	0	0	2822.05	1428.1	1227.05	0	0	0	0
COPS7A	0	0	0	0	664.59	398.68	0	0	0	0	0	0	0	0	0	0	0	0	0	0	0	0	3598.55	1449.7	0	0	0	0	0	0	0	0	0	0	0	0	0	0	0	0	0	0	0	0	0	0	0	0	0
COQ8A	0	0	0	0	3936.65	916.035	0	0	0	0	0	0	0	0	0	0	0	0	0	0	0	0	0	0	0	0	0	0	0	0	0	0	0	0	4790.1	1257	0	5837.25	4191.3	0	0	0	0	0	0	0	0	0	0
COX4I1	0	0	0	0	1333.6	788.82	0	0	0	7976.85	0	3245	0	0	0	0	0	0	0	0	0	0	0	0	0	0	0	6857.55	1263.5	3579.7	0	0	0	0	9217.4	4727.45	0	16428.5	22107	608.33	0	2361.3	0	0	0	0	0	0	0
COX5B	0	0	0	0	532.79	510.225	0	0	0	1354.85	0	1049.36	0	0	0	0	0	0	0	0	0	0	0	0	0	0	0	15217	0	5408.95	0	0	0	0	738.36	588.49	0	11746.5	11242.5	0	0	0	0	0	0	0	0	0	0
COX6C	0	0	0	0	4153.2	3691.8	0	0	0	20962.5	0	16090.5	0	0	0	0	0	0	0	0	0	0	2688	1874	0	0	0	7048.6	0	3955.9	0	0	0	0	13034.5	9255.35	0	24859.5	22750.5	7473.25	0	3690.85	2999.3	0	1568.9	0	0	0	0
COX7A2	0	0	0	0	3533.85	1702.2	0	0	0	5094	0	13334	0	0	0	0	0	0	0	0	0	0	1276.4	1219.7	0	0	0	18479	0	8002.45	0	0	0	0	4148.9	4614.9	0	2500.7	12679.5	4790	0	1397.8	0	0	0	0	0	0	0
CPNE3	0	0	0	0	3416.7	4014.75	21382.5	0	13324	6217.25	0	14263	0	0	0	0	0	0	0	14017.5	13960.5	0	9646.65	9168.1	0	0	0	2763.5	0	1592.05	0	0	0	0	11363.5	17276.5	0	4395.05	6637.5	18517	0	18277.5	22227	0	21278	0	0	0	0
CYB5B	0	0	0	0	3628.35	3021.15	0	0	0	2758.95	0	4062.1	0	0	0	0	0	0	0	2012.45	4251.85	0	3648.65	4743.35	0	0	0	38869	0	12852.5	0	0	0	0	6681.1	8234.9	0	15604.5	15290.5	4429.6	0	1538.55	3604.85	0	2949.15	0	0	0	0
CYB5R3	0	0	0	0	2300.55	1077.35	0	0	0	0	0	0	0	0	0	0	0	0	0	0	0	0	0	0	0	0	0	9686	0	1887.05	0	0	0	0	6167.35	2894.25	0	8869.55	8847.9	0	0	0	0	0	0	0	0	0	0
CYP51A1	0	0	0	0	1428.15	855.395	0	0	0	0	0	0	0	0	0	1142	1496	1388.6	0	0	0	0	0	0	3313.15	1733.7	1088.03	5021.3	0	2530.55	0	0	0	363.05	2727.4	2339.7	0	4361.8	2855.9	705.16	0	1291.2	897.235	0	880.715	0	0	0	0
DDX10	0	0	0	0	1623.5	769.805	0	0	0	0	0	0	0	0	0	0	0	0	0	0	0	0	0	0	0	0	0	0	0	0	0	0	0	0	0	0	0	599.585	387.535	0	0	0	0	0	0	0	0	0	0
DDX20	0	0	0	0	868.655	800.955	0	0	0	0	0	0	0	1024.34	485.385	0	0	0	0	0	0	0	2515.75	1384.93	0	0	0	221.11	1228.9	882.885	0	0	0	0	0	0	0	1619.25	1536.7	0	0	0	0	0	0	0	0	0	0
DHX36	0	0	0	0	5656.65	2051.85	0	0	0	0	0	0	0	0	0	0	0	0	0	0	0	0	0	0	0	0	0	0	0	0	0	0	0	0	0	0	0	0	0	0	0	0	0	0	0	0	0	0	0
DNAJC11	0	0	0	0	12409	9196.8	262371	6288.2	147768	0	0	0	0	0	0	0	0	0	0	0	0	0	0	0	0	0	0	0	0	0	0	0	0	0	0	0	0	0	0	0	0	0	478570	2834.5	233511	960.775	1356.66	1914	0
DNM2	0	0	0	0	696.38	1460.65	0	0	0	11287	0	11680.9	0	0	0	0	0	0	0	6415.2	4660.85	0	2829.5	3410.05	0	0	0	1301.8	2094.6	1484.7	0	0	0	0	1247.1	1492.2	0	923.18	323.825	6133.5	0	4105.65	7048.1	0	5992.85	0	0	0	0
ECH1	0	0	0	0	2307.4	1036.8	0	0	0	0	0	0	0	0	0	0	0	0	0	0	0	0	826.7	571.27	0	0	0	0	0	0	0	0	0	0	3066.4	2251.35	0	3465.55	1299.9	0	0	0	806.97	0	997.055	0	0	0	0
EHD1	0	0	0	0	769.5	703.075	0	0	0	0	0	0	0	0	0	0	0	0	0	4259.95	2827.3	0	1774.13	4092.65	0	0	0	0	0	0	0	0	0	0	1561.7	1138.9	0	4514	2885.5	1550.3	0	2347.85	2078.3	0	2677.95	0	0	0	0
EIF2AK2	0	0	0	0	656.305	808.93	0	0	0	0	0	0	0	0	0	0	0	0	0	0	0	0	1320.97	1246	0	0	0	0	0	0	0	0	0	0	0	0	0	0	0	0	0	0	0	0	0	0	0	0	0
EMC2	0	0	0	0	1326.55	829.19	0	0	0	0	0	0	0	0	0	0	0	0	0	0	0	0	0	0	0	0	0	0	0	0	0	0	0	0	440.83	776.205	0	0	0	0	0	0	0	0	0	0	0	0	0
EPB41L2	0	0	0	0	1352.8	686.93	0	0	0	511.29	0	784.585	0	0	0	0	0	0	0	3069.15	1120.65	0	3059.65	2218.6	0	0	0	0	0	0	0	0	0	0	546.115	308.825	0	8077.25	3215.25	1071.37	0	885.305	0	0	0	0	0	0	0
EPB41L5	0	0	0	0	980.175	415.475	0	0	0	0	0	0	0	0	0	0	0	0	0	0	0	0	0	0	0	0	0	0	0	0	0	0	0	0	2194.45	796.75	264.77	2718.5	966.84	0	0	0	0	0	0	0	0	0	0
ERVMER34-1	0	0	0	0	1841.1	1121.8	0	0	0	0	0	0	2515.05	2685.05	1987	2548.25	611.71	1643.75	0	0	0	0	0	0	0	0	0	1798.6	1623.3	1272.48	0	0	0	0	1271.2	795.56	0	680.75	750.995	0	0	0	0	0	0	1255.9	3640.55	1000.09	0
ESYT1	0	0	0	0	1120.9	3418.5	4343.75	3162.8	1238.1	1377.42	0	4292.75	0	0	0	0	0	0	0	3378.05	1457.3	0	8325.9	5268.85	0	0	0	0	0	0	0	0	0	0	10024.5	11390.5	0	7682.7	10903	10269.4	0	5264.15	7700.15	0	3929.4	0	0	0	0
EXOC1	0	0	0	0	625.425	371.305	0	0	0	0	0	0	0	0	0	0	0	0	0	0	0	0	0	0	0	0	0	0	0	0	0	0	0	0	0	0	0	2587.95	1423.8	0	0	0	0	0	0	0	0	0	0
FAM126A	0	0	0	0	1008.98	747.205	0	0	0	0	0	0	0	0	0	0	0	0	0	0	0	0	0	0	0	0	0	0	0	0	0	0	0	0	986.545	442.52	0	2379.45	1000.83	0	0	0	0	0	0	0	0	0	0
FAM162A	0	0	0	0	2839.45	2214.65	0	0	0	923.325	0	2510.6	0	0	0	0	0	0	0	0	0	0	2261.8	997.755	0	0	0	5862.5	0	2009.05	0	0	0	0	5796.15	5547.7	0	4030.45	8304.9	0	0	0	0	0	0	0	0	0	0
FLNB	0	0	0	0	3265.3	782.885	496365	37201	297725	366360	14870.4	613335	0	0	0	0	0	0	3138.45	346515	297795	0	109535	108475	0	0	0	1632.45	1951.69	3049.85	0	0	0	0	0	0	0	0	0	479575	9026.75	304690	376835	68219	320170	0	0	0	0
FLOT1	0	0	0	0	631.38	598.78	0	0	0	0	0	0	0	0	0	0	0	0	0	0	0	0	0	0	0	0	0	11002.5	0	4029.7	0	0	0	0	1919.8	1184.6	0	2499	1795.65	0	0	0	0	0	0	0	0	0	0
FLOT2	0	0	0	0	608.395	398.975	0	0	0	0	0	0	0	0	0	0	0	0	0	0	0	0	0	0	0	0	0	18668	541.165	3730.4	0	0	0	0	585.655	903.785	0	2112.35	1856.9	0	0	0	0	0	0	0	0	0	0
FTO	0	0	0	0	1456.9	1558.45	0	0	0	3479.45	0	3216.5	0	0	0	0	0	0	0	0	0	0	4136.35	2912.35	0	0	0	0	0	0	0	0	0	0	0	0	0	0	0	2525.45	0	1962.2	777.12	0	1605.04	0	0	0	0
G6PD	0	0	0	0	298.35	297.65	0	0	0	152.536	0	592.13	0	0	0	0	0	0	0	3460.5	1420.9	0	11077.5	7761.3	0	0	0	0	0	0	0	0	0	0	67.9695	340.535	0	405.005	295.985	4340.85	0	2595.85	7821.7	0	5999.85	0	0	0	0
GCDH	0	0	0	0	5242.55	3642.6	0	0	0	3403.25	0	1917.9	0	0	0	0	0	0	0	0	0	0	0	0	0	0	0	0	0	0	0	0	0	0	7215.55	4301.9	0	7931.55	6281.7	0	0	0	0	0	0	0	0	0	0
GHITM	0	0	0	0	2094.3	1235.4	0	0	0	7091.05	0	4180.05	0	0	0	0	0	0	0	0	0	0	0	0	0	0	0	8018.7	0	2308.05	0	0	0	0	4851.5	3311.8	0	6733.25	4786.45	0	0	0	0	0	0	0	0	0	0
GLDC	0	0	0	0	1410.45	792.485	0	0	0	627.985	0	367.31	0	0	0	0	0	0	0	0	0	0	0	0	0	0	0	0	0	0	0	0	0	0	0	0	0	4479.9	2707.05	0	0	0	0	0	0	0	0	0	0
GLS	0	0	0	0	1323.3	314.605	0	0	0	3587	0	3481.4	0	0	0	0	0	0	0	1591.3	345.205	0	8011.1	4784.8	0	0	0	0	0	0	0	0	0	0	1758.35	1214.05	0	4762.1	5079.8	5647.8	0	1870.85	8817.05	0	4006.15	0	0	0	0
GLUL	0	0	0	0	303.41	158.57	0	0	0	402.9	0	361.255	0	0	0	0	0	0	0	13917	9661.5	0	9277.45	12915.9	0	0	0	0	0	0	0	0	0	0	413.185	218.81	0	553.995	396.855	0	0	0	694.45	0	324.53	0	0	0	0
GMEB2	0	0	0	0	3745.65	2153.4	0	0	0	0	0	0	0	0	0	0	0	0	0	10103.1	8170.8	0	9848.1	6783.2	0	0	0	0	2034.9	1448.85	0	0	0	0	1534.15	1084.6	0	5667.3	5130.3	7374.1	0	5325.45	8189.3	0	3032.8	0	0	0	0
GNA11	0	0	0	0	425.55	398.585	0	0	0	1907.4	0	872.08	0	0	0	0	0	0	0	2799.65	2468.55	0	3222.8	2549.25	0	0	0	0	0	0	0	0	0	0	0	0	0	7393.75	3543.45	2001.7	0	696.565	0	0	0	0	0	0	0
GNAI3	0	0	0	0	2416.65	1813.45	3829.05	0	1367.5	6182.9	0	6813.9	0	0	0	0	0	0	0	5283.75	3182.5	0	6315.5	4217.15	0	0	0	4142.55	0	2571.5	0	0	0	0	2749.4	1876.7	0	7783.7	6997.15	5295.05	0	5352.3	4888.45	0	2637.35	0	0	0	0
GNG12	0	0	0	0	1436.45	980.315	0	0	0	1640.7	0	1170.95	0	0	0	0	0	0	0	1833.8	2729.85	0	3966.6	1652.25	0	0	0	2003.55	102.37	761.325	0	0	0	0	1589.4	1193.19	0	5481.8	3055.7	0	0	0	0	0	0	0	0	0	0
GORASP2	0	0	0	0	1537	528.91	0	0	0	2434.25	0	2153.2	0	0	0	0	0	0	0	3349.15	1861.15	0	7722.3	6176.25	0	0	0	2356.8	0	1045.36	0	0	0	0	1503.55	848.22	0	4965	1415.85	2572.5	0	732.455	4027.5	0	3229.35	0	0	0	0
GPD2	0	0	0	0	422.03	180.085	0	0	0	3403.95	0	853.42	0	0	0	0	0	0	0	0	0	0	0	0	0	0	0	7583.45	0	1430.07	0	0	0	0	0	0	0	7931.35	4657.75	0	0	0	0	0	0	0	0	0	0
GSS	0	0	0	0	2993.85	2557.2	11972.5	2984.8	9449.7	2726.65	0	4887.5	0	0	0	0	4928.15	4664.65	0	0	0	0	19364.5	17206.5	0	4673.65	5785.85	2454	5278.7	2533.3	0	0	0	0	5663.6	6435.45	0	10031.1	23342.5	0	0	0	4276.45	5272.3	11301	0	0	0	0
HEATR5B	0	0	0	0	1155.3	1334.9	0	0	0	0	0	0	1638.9	4584.65	2762.45	1558.99	2284.6	1504.91	0	0	0	0	2190.9	1677.25	857.89	820.17	3687.05	0	3516.95	1281.15	0	0	0	0	2569.1	1161.55	444.18	1839.05	2423.85	0	0	0	2533.75	0	1362	1952.17	3095.05	2493.1	1480.17
HEXIM1	0	0	0	0	1408.05	742.78	0	0	0	4160.45	0	2613.2	0	0	0	0	0	0	0	1405.8	785.18	0	3634.55	2333.25	0	0	0	0	0	0	0	0	0	0	0	0	0	3105.4	1299.77	2434.9	0	989.035	4031.7	0	1646.5	0	0	0	0
HINT1	0	0	0	0	919.86	313.055	0	0	0	2162.3	0	860.2	0	0	0	0	0	0	0	6552.45	4321.45	0	29174.5	17656	0	0	0	0	0	0	0	0	0	0	1800.45	300.495	0	5937	4501.45	0	0	0	5370.45	0	3302.45	0	0	0	0
HSD17B7	0	0	0	0	12050.7	16264	0	0	0	0	0	0	0	0	0	0	0	0	0	0	0	0	26911	19157.5	0	0	0	0	0	0	0	0	0	0	15929.5	5804.85	0	12155	11921.5	23417.4	0	33469	38139.5	0	38120.5	0	0	0	0
HYOU1	0	0	0	0	802.295	314.75	3919.6	0	754.05	1182.1	0	874.895	0	0	0	28.063	2707.75	439.38	0	8699.4	6080.1	0	14485	17311	1362.7	124.835	175.11	222.685	0	114.285	0	0	0	0	1714.35	437.11	0	4244.7	3171.6	4830.55	0	2731.65	13263	0	7231.4	0	0	0	0
IGF2BP2	0	0	0	0	1679.2	2229.1	0	0	0	0	0	0	0	0	0	0	0	0	0	0	0	0	2131.45	1630.45	0	0	0	0	863.28	937.99	0	0	0	0	1354.35	1773.65	0	0	0	0	0	0	0	0	0	0	0	0	0
IGKV2D-24	0	0	0	0	5884.45	4123.8	0	0	0	0	0	0	0	0	0	0	0	0	0	0	0	0	0	0	0	0	0	0	0	0	0	0	0	0	0	0	0	0	0	0	0	0	0	0	0	0	0	0	0
KIFBP	0	0	0	0	2642.8	3035.05	0	0	0	0	0	0	3072.85	1984.45	2286.7	0	0	0	0	0	0	0	0	0	0	0	0	6419.5	2096.15	4189.3	0	0	0	0	4688.25	2732.35	0	6303.8	3717.6	0	0	0	0	0	0	3409.4	4552.55	3080.95	0
LAMTOR1	0	0	0	0	518.035	711.2	0	0	0	1087.3	0	551.88	0	0	0	0	0	0	0	0	0	0	1058.95	1085.2	0	0	0	3977.1	0	1962.55	0	0	0	0	900.12	737.505	0	5120.95	948.655	0	0	0	0	0	0	0	0	0	0
LANCL2	0	0	0	0	1126.22	5159.85	0	0	0	0	0	0	0	0	0	0	0	0	0	0	0	0	0	0	0	0	0	0	0	0	0	0	0	0	0	0	0	0	0	0	0	0	0	0	0	0	0	0	0
LARS1	0	0	0	0	1179.95	589.08	0	0	0	0	0	0	0	0	0	0	0	0	0	0	0	0	4088.95	2391.8	0	0	0	0	0	0	0	0	0	0	1285.95	562.99	0	959.895	1622	0	0	0	2546.55	0	559.185	0	0	0	0
LGALS2	0	0	0	0	1381.35	854.015	0	0	0	0	0	0	0	0	0	0	0	0	0	0	0	0	9754.5	5464.2	0	0	0	795.845	0	511.625	0	0	0	0	2276	1073.44	0	3847.35	3296.25	0	0	0	0	0	0	0	0	0	0
MAIP1	0	0	0	0	2012.65	415.26	0	0	0	0	0	0	0	0	0	0	0	0	0	0	0	0	0	0	0	0	0	0	0	0	0	0	0	0	2925.8	938.74	0	0	0	0	0	0	0	0	0	0	0	0	0
MAP2K2	0	0	0	0	2781.6	1059.3	0	0	0	0	0	0	0	0	0	0	0	0	0	0	0	0	4271.3	2645.8	0	0	0	0	0	0	0	0	0	0	2279.35	1793.25	0	1946.05	2975.35	1182.35	0	1801.35	4015.75	0	1796.6	0	0	0	0
MARCKSL1	0	0	0	0	3207.55	1977.35	0	0	0	9066.3	0	6288.95	0	0	0	0	0	0	0	4689.3	3262.75	0	10185	6797.6	0	0	0	5518.05	0	1908.95	0	0	0	0	4021.8	1868.35	0	26696	15753.5	0	0	0	2106.75	0	1089.05	0	0	0	0
MATR3	0	0	0	0	6697.7	4510.25	0	0	0	0	0	0	1460.3	1475.45	1083.78	1205.65	977.6	723.57	0	0	0	0	0	0	0	0	0	4442.3	1247.22	2462	0	0	0	0	0	0	0	1665.55	1456.3	0	0	0	0	0	0	887.525	3584.1	1486.65	0
MGST3	0	0	0	0	4723.7	2107.3	0	0	0	10683.6	0	6109.6	0	0	0	0	0	0	0	0	0	0	0	0	0	0	0	9476.35	0	4772.2	0	0	0	0	10463	7020.7	0	12799	16779.5	4566.6	0	1182.57	0	0	0	0	0	0	0
MISP	0	0	0	0	2185.3	525.47	0	0	0	17477.5	0	13130	0	240.64	188.515	0	0	0	0	36225	24508	0	16127	12553	0	0	0	242.9	192.29	184.785	0	0	0	0	2642.2	259.27	0	6668.5	4970.7	7380.95	0	3048.6	3134.05	0	1678.65	0	0	0	0
MRPL11	0	0	0	0	851.395	308.695	0	0	0	1457.1	0	932.88	0	0	0	0	0	0	0	0	0	0	0	0	0	0	0	3759	335.78	2502.95	0	0	0	0	1479.4	489	0	4336.9	3088.05	0	0	0	0	0	0	0	0	0	0
MRPL37	0	0	0	0	451.455	169.005	0	0	0	0	0	0	0	0	0	0	0	0	0	0	0	0	0	0	0	0	0	4380.5	0	766.905	0	0	0	0	0	0	0	3329.8	3133.75	0	0	0	0	0	0	0	0	0	0
MRPS31	0	0	0	0	808.755	757.83	0	0	0	0	0	0	0	0	0	0	0	0	0	0	0	0	0	0	0	0	0	0	0	0	0	0	0	0	1371.3	1020.26	0	4789.7	5647.2	0	0	0	0	0	0	0	0	0	0
MRPS35	0	0	0	0	870.66	252.115	0	0	0	1620.6	0	1354.08	0	0	0	0	0	0	0	0	0	0	0	0	0	0	0	1428.84	0	1413.75	0	0	0	0	1560.85	346.27	0	7839.25	4288.6	0	0	0	0	0	0	0	926.705	802.115	0
MT-CO2	0	0	0	0	2021.4	2641.9	0	0	0	12392	0	5699	0	0	0	1612.95	1381.75	1923.25	0	0	0	0	0	0	0	0	0	8502.75	0	3497.15	0	0	0	0	7128.85	7733.6	0	2469.45	9662.6	3883.95	0	1194.32	0	0	0	0	0	0	0
MT-CO3	0	0	0	0	1145.39	478.745	0	0	0	2539.85	0	7027.9	0	0	0	0	0	0	0	0	0	0	0	0	0	0	0	0	0	0	0	0	0	0	3458.8	2899.5	0	3198.5	4521.95	881.335	0	439.015	0	0	0	0	0	0	0
MTCH2	0	0	0	0	777.145	435.905	0	0	0	3023.25	0	4345	0	0	0	0	0	0	0	0	0	0	0	0	0	0	0	9785.15	0	3002.1	0	0	0	0	5818.7	4512.65	0	11476.5	11738.8	2199.9	0	596.16	0	0	0	0	0	0	0
MTMR2	0	0	0	0	724.81	252	0	0	0	0	0	0	0	0	0	0	0	0	0	0	0	0	0	0	0	0	0	0	0	0	0	0	0	0	0	0	0	0	0	0	0	0	0	0	0	0	0	0	0
MTX1	0	0	0	0	2631	1213.85	0	0	0	2879.85	0	1667.7	0	0	0	0	0	0	0	0	0	0	0	0	0	0	0	7031.6	0	2280.4	0	0	0	0	4373.9	2670.85	0	6327.55	7833.85	0	0	0	0	0	0	0	0	0	0
MTX2	0	0	0	0	628.375	440.195	0	0	0	539.45	0	1366.39	0	0	0	0	0	0	0	0	0	0	0	0	0	0	0	22149.5	0	9018.75	0	0	0	0	1670.15	1581.15	0	4843.05	4819.8	0	0	0	0	0	0	0	0	0	0
MYO1C	0	0	0	0	4257.2	4224.85	3568.05	0	574.575	5035.95	0	5494.1	0	0	0	0	0	0	0	9682.8	5380.75	0	5448.7	5404.85	0	0	0	5431.05	78.892	2416.95	0	0	0	0	2377.15	3105.95	0	17518	11860.5	13467.5	0	8418.5	3819.65	0	1538.1	0	0	0	0
NAA10	0	0	0	0	1101.15	888.74	0	0	0	3421.4	0	1256.15	0	633.055	653.82	672.765	156.8	536.285	0	0	0	0	4157.65	1371.7	0	0	0	0	0	0	0	0	0	0	0	0	0	5542.4	2815.65	0	0	0	5032.95	0	1090.75	0	0	0	0
NDUFA6	0	0	0	0	741.15	340.81	0	0	0	2874.4	0	1375.69	0	0	0	0	0	0	0	0	0	0	0	0	0	0	0	0	0	0	0	0	0	0	1007.12	427.525	0	3336	1888.25	0	0	0	0	0	0	0	0	0	0
NDUFA9	0	0	0	0	440.8	599.485	0	0	0	1745.9	0	1608.3	0	0	0	0	0	0	0	0	0	0	0	0	0	0	0	5275.6	390.87	3312.35	0	0	0	0	1886.95	1737.4	0	5862.8	5105	0	0	0	0	0	0	0	0	0	0
NDUFV1	0	0	0	0	182.26	119.055	0	0	0	427.235	0	749.97	0	0	0	0	0	0	0	0	0	0	0	0	0	0	0	13104.5	0	4152.9	0	0	0	0	665.62	377.095	0	3551.3	3260.2	0	0	0	0	0	0	0	0	0	0
NUP133	0	0	0	0	2621.9	1710.1	0	0	0	0	0	0	0	0	0	0	0	0	0	0	0	0	0	0	1049.8	1459.5	1788.95	751.775	1639.7	1454.09	0	0	0	0	1074.6	582.81	0	1314.4	1616.25	0	0	0	0	0	0	0	0	0	0
NUP155	0	0	0	0	4540.85	1301.1	0	0	0	0	0	0	0	0	0	0	0	0	0	0	0	0	4267	1436.54	0	0	0	26676	0	23197.5	0	0	0	0	4992.65	3817.15	0	2393.1	3901.45	0	0	0	0	0	0	0	0	0	0
ORMDL3	0	0	0	0	4104.45	1974.9	0	0	0	0	0	0	0	0	0	0	0	0	0	0	0	0	0	0	0	0	0	0	0	0	0	0	0	0	5764.1	2314	0	6188.8	3388.65	0	0	0	0	0	0	0	0	0	0
OSBP	0	0	0	0	776.365	447.02	0	0	0	3553.9	0	1233.03	0	0	0	0	0	0	0	0	0	0	3465.8	1013.22	0	0	0	0	0	0	0	0	0	0	2730.85	733.41	0	4782.25	2170.25	2072.5	0	945.94	4107.7	0	1539.87	0	0	0	0
OTUB1	0	0	0	0	542.23	267.54	7544	0	1471.8	5669.45	0	3114.95	0	0	0	0	0	0	0	6593.8	3653.75	0	14332.5	12149.5	0	0	0	0	0	0	0	0	0	0	1573.6	620.115	0	5239.4	3576.55	5775.15	0	3296.45	10965	0	7350.7	0	0	0	0
PARD3	0	0	0	0	2335.35	1906.8	0	0	0	2832.25	0	2654.85	0	0	0	0	0	0	0	0	0	0	3355.55	2072.1	0	0	0	3611.95	1805	2148.7	0	0	0	0	2930.75	1954.05	0	3056.95	3482.95	3210.75	0	2602.45	2554.35	0	2789.8	0	0	0	0
PATL1	0	0	0	0	2305.95	1271.44	0	0	0	0	0	0	0	0	0	0	0	0	0	0	0	0	0	0	0	0	0	0	0	0	0	0	0	0	0	0	0	0	0	0	0	0	0	0	0	0	0	0	0
PCYT1B	0	0	0	0	834.135	1342.8	0	0	0	1051.25	0	1665.1	0	0	0	0	0	0	0	2056.3	838.855	0	2333.5	1638.65	0	0	0	0	0	0	0	0	0	2550.2	2558.05	1174.5	2412.86	1033.92	3042.4	2331.3	0	925.27	0	0	0	0	0	0	0
PDCD5	0	0	0	0	1513.8	958.01	0	0	0	7502	0	2453.65	0	0	0	0	0	0	0	11505.7	4511.2	0	23798.5	15926.5	0	0	0	4600.7	0	2154.07	0	0	0	0	2317.15	1022.1	0	7668.2	4477.3	2469.35	0	1183.91	7511.45	0	5030.25	0	0	0	0
PDCD6IP	0	0	0	0	1216	1202.06	10379.5	0	4075.75	4583.45	0	6805.55	0	0	0	0	0	0	0	7900.4	4876.2	0	13397	11759	0	0	0	866.49	19.737	135.65	0	0	0	0	1618.85	1578.95	0	1487.25	3327.9	11288.5	0	4989.6	11775	0	10533	0	0	0	0
PDHB	0	0	0	0	3386.4	1709.25	0	0	0	4789.2	0	2980	0	0	0	0	0	0	0	0	0	0	933.795	227.605	0	0	0	36630	151.78	13097.8	0	0	0	0	6123.75	4394.95	0	24222.5	39522.5	1861.25	0	1148.02	0	0	0	0	0	0	0
PHAX	0	0	0	0	1493.2	1204.75	0	0	0	0	0	0	0	0	0	0	0	0	0	0	0	0	3646.85	1258.5	0	0	0	0	0	0	0	0	0	0	1285.4	859.965	0	1179	1155	0	0	0	0	0	0	0	0	0	0
PHYHIP	0	0	0	0	4116.75	5484.25	0	0	0	0	0	0	0	0	0	0	0	0	0	0	0	0	300.645	3708.9	0	0	0	0	0	0	0	0	0	0	867.705	4154.2	0	0	0	3863.6	0	3593.3	5007.15	0	3426.05	0	0	0	0
PIP4P1	0	0	0	0	2742.55	4339.95	0	0	0	0	0	0	0	4255.6	2322.5	0	0	0	0	5267.25	3479.55	12396	5780.65	4364.85	0	0	0	4166.9	1895.15	1362.4	0	0	0	0	3205.05	6647.75	907.44	2276.5	2570.55	5390.95	0	1242.51	0	0	0	0	0	0	0
PLBD2	0	0	0	0	1280.7	2264.25	0	0	0	1962.9	0	5828.5	0	0	0	0	0	0	0	3036.1	3932.05	0	0	0	0	0	0	0	0	0	0	0	0	0	0	0	0	2946.75	1795.65	0	0	0	0	0	0	0	0	0	0
PLOD1	0	0	0	0	1159.15	912.96	0	0	0	0	0	0	0	0	0	0	0	0	0	0	0	0	2801.35	927.34	0	0	0	0	0	0	0	0	0	0	1377.7	2194.9	0	2305.6	2201.55	1371.75	0	565.975	0	0	0	0	0	0	0
PLOD3	0	0	0	0	487.68	751.03	0	0	0	0	0	0	0	1398.22	1608.2	1003.9	1112.14	1339.2	0	0	0	0	0	0	0	0	0	245.12	1994.05	991.81	0	0	0	0	1887	2691.75	0	2573.8	2260.45	0	0	0	0	0	0	0	0	0	0
PMPCA	0	0	0	0	253.525	199.73	5995.35	0	3264.1	22549	0	8444.2	0	0	0	0	0	0	0	0	0	0	2031.6	554.04	0	0	0	0	0	0	0	0	0	0	479.75	188.755	0	5039.1	2680.75	15252.5	51.506	12583.5	13772	0	10913	0	0	0	0
PNPT1	0	0	0	0	1302.9	754.49	0	0	0	1228.35	0	1081.32	0	0	0	0	0	0	0	0	0	3129.75	219.85	365.57	0	0	0	1636.5	429.93	718.8	0	0	0	0	1320.22	711.225	0	6581.05	6996.6	0	0	0	0	0	0	0	0	0	0
POF1B	0	0	0	0	414.32	888.75	0	0	0	773.8	0	847.49	0	0	0	0	0	0	0	2157.1	898.3	0	2631.4	1153.21	0	0	0	2780.75	1060.3	1009.08	0	0	0	0	4424.1	2310.65	0	4362.9	1653.65	0	0	0	0	0	0	0	0	0	0
POLR2K	0	0	0	0	955.395	612.57	0	0	0	0	0	0	0	0	0	0	0	0	0	0	0	0	0	0	0	0	0	0	0	0	0	0	0	0	0	0	0	0	0	0	0	0	0	0	0	0	0	0	0
PPID	0	0	0	0	1108.5	818.845	0	0	0	0	0	0	0	0	0	1794.45	1916.65	1329.3	0	1580.35	1221.01	0	6333.8	3524.05	0	0	0	0	0	0	0	0	0	0	0	0	0	1601.35	1104.85	1659.25	0	1953.75	1902.7	0	1680.85	0	0	0	0
PPP2R1B	0	0	0	0	654.055	577.655	0	0	0	3220.45	0	1149.65	0	0	0	0	0	0	0	0	0	0	3743.6	1644.55	0	0	0	1196	261.89	717.75	0	0	0	0	1019.35	588.57	0	762.285	1079.55	0	0	0	1395.3	0	1009.82	0	0	0	0
PRKAA1	0	0	0	0	1211.65	1104.62	0	0	0	0	0	0	0	0	0	0	0	0	0	0	0	0	2524.6	1493.25	0	0	0	0	0	0	0	0	0	0	0	0	0	2596.5	1778.3	0	0	0	0	0	0	0	0	0	0
PRKACA	0	0	0	0	1186.25	887.1	0	0	0	0	0	0	0	0	0	0	0	0	0	0	0	0	0	0	0	0	0	0	2045.95	790.3	0	0	0	0	0	0	0	879.365	1502.35	0	0	0	0	0	0	0	0	0	0
PRKAR2A	0	0	0	0	5597.3	3396.6	0	0	0	20892.8	0	14915.5	0	0	0	0	0	0	0	7561.8	4094.1	0	15984.5	7407.2	0	0	0	0	0	0	0	0	0	0	4671.7	4725.7	0	25004.5	12172	0	0	0	12244.4	0	4404.7	0	0	0	0
PSMG2	0	0	0	0	350.13	418.31	0	0	0	3270.1	0	2510.2	0	739.8	372.375	0	0	0	0	2371.65	1559.05	0	4723.1	2872.4	0	0	0	0	0	0	0	0	0	0	0	0	0	0	0	0	0	0	3287.75	0	2223.15	0	0	0	0
PTP4A1	0	0	0	0	1372.9	823.365	0	0	0	1823.1	0	1708.75	2463.8	572.3	771.325	0	0	0	0	0	0	0	0	0	0	0	0	523.185	0	672.15	0	0	0	0	0	0	0	2815.2	1355.75	0	0	0	0	0	0	0	0	0	0
RAB1B	0	0	0	0	2924.05	745.065	1937.35	0	2055.9	9105.55	0	4033.35	0	0	0	0	0	0	0	6324.4	3178.1	0	3059.1	2354.25	0	0	0	6840.55	0	5374.45	0	0	0	0	5097.7	1838.5	0	14289.5	7069.75	2460.2	0	1306.2	1545.9	0	780.115	0	0	0	0
RAB21	0	0	0	0	4051.1	2057.7	0	0	0	6488.95	0	3583.45	790.38	325.98	142.596	0	0	0	0	0	0	0	1261.05	2804.65	0	0	0	4481.9	1279.45	2445.95	0	0	0	0	3730.65	1669.85	0	8125.95	2126.3	2985.25	0	2427.25	3905.95	0	2331.6	0	0	0	0
RAB39A	0	0	0	0	1220.25	845.465	0	0	0	0	0	0	0	0	0	0	0	0	0	0	0	0	0	0	0	0	0	0	0	0	0	0	0	0	3363.5	1647.85	0	2638.55	2795.35	0	0	0	0	0	0	0	0	0	0
RAB5A	0	0	0	0	254.125	530.185	0	0	0	0	0	0	0	0	0	0	0	0	0	0	0	0	363.038	481.385	0	0	0	0	0	0	0	0	0	0	972.67	435.25	0	622.5	1718.8	0	0	0	0	0	0	0	0	0	0
RAP1A	0	0	0	0	5020.16	164.54	0	0	0	79080	0	59883	0	0	0	0	0	0	0	0	0	0	4578.7	3332.95	0	0	0	4302.85	0	2812.95	0	0	0	0	260.77	858.61	0	284.69	276.405	0	0	0	0	0	0	0	0	0	0
RAVER1	0	0	0	0	521.3	607.355	0	0	0	0	0	0	0	0	0	0	0	0	0	0	0	0	0	0	0	0	0	0	0	0	0	0	0	0	950.635	1099.54	0	878.15	537.655	0	0	0	0	0	0	0	0	0	0
RBX1	0	0	0	0	2513.35	918.58	0	0	0	1851.35	0	1348.55	0	0	0	0	0	0	0	0	0	0	0	0	0	0	0	0	0	0	0	0	0	0	2768.5	1131	0	3146.45	2053.85	0	0	0	0	0	0	0	0	0	0
REEP6	0	0	0	0	1878.5	1281.15	0	0	0	0	0	0	0	0	0	0	0	0	0	0	0	0	2498.25	1891.9	0	0	0	0	0	0	0	0	0	0	3064.25	1423.7	0	1799	1515.9	0	0	0	0	0	0	0	0	0	0
RIOK2	0	0	0	0	1297.82	441.185	0	0	0	1170.8	0	1199.15	0	0	0	0	0	0	0	0	0	0	0	0	0	0	0	843.05	203.51	566.58	0	0	0	0	0	0	0	1180.95	1400.35	1577.7	0	1613.75	0	0	0	0	0	0	0
RPL11	0	0	0	0	2913.8	1127.99	0	0	0	0	0	0	0	0	0	0	0	0	0	0	0	0	0	0	0	0	0	0	0	0	0	0	0	0	0	0	0	0	0	0	0	0	0	0	0	0	0	0	0
RPL39P5	0	0	0	0	505.495	407.965	0	0	0	0	0	0	2012.1	608.83	1106.83	4232.9	231.26	1032.92	1183.18	912.365	539.52	0	1477.45	1349.35	5382.05	1580.5	0	1157.8	0	764.485	0	0	0	0	1140.25	895.51	2000.3	1128.5	1150.8	1719.35	0	1786.65	3577.4	0	1192.1	0	0	0	0
RTF1	0	0	0	0	1113.29	568.555	0	0	0	0	0	0	0	0	0	0	0	0	0	0	0	0	0	0	0	0	0	0	0	0	0	0	0	0	1194.94	538.34	0	1358.6	726.65	0	0	0	0	0	0	0	0	0	0
S100A13	0	0	0	0	2364.9	1993	0	0	0	5053.85	0	4365.95	0	5915.95	3891.5	0	7691.7	2619.95	0	4688	2632.25	0	6601.4	4405.6	2681.8	4380.4	4983.4	3139.3	5789.8	5525.45	0	0	0	0	0	0	0	0	0	0	0	0	5488.25	0	3079.35	0	0	0	0
S100A7	0	0	0	0	7483.75	5174.9	0	0	0	0	0	0	0	0	0	0	0	0	0	0	0	0	0	0	0	0	0	0	0	0	0	0	0	0	0	0	0	0	0	0	0	0	0	0	0	0	0	0	0
S100A8	0	0	0	0	2196.6	2210.55	0	0	0	0	0	0	0	0	0	0	0	0	0	0	0	0	0	0	0	0	0	0	0	0	0	0	0	0	0	0	0	0	0	0	0	0	0	0	0	0	0	0	0
SAE1	0	0	0	0	2096	1684.25	0	0	0	6382.35	0	2503	0	0	0	0	0	0	0	1473.4	1731.84	0	4683.2	3819.75	0	0	0	0	0	0	0	0	0	0	0	0	0	2807.65	1533.9	1927.75	0	994.57	2425.05	0	2742.3	0	0	0	0
SARNP	0	0	0	0	1201.4	610.305	0	3607.75	645.175	0	0	0	705.12	1282.45	564.19	561.525	2843.95	1091.5	0	0	0	0	0	0	579.56	1604.15	3445.3	87103	3636.9	47600	1390.4	5499.4	5479.55	0	906.97	441.33	0	442.975	883.85	0	0	0	0	0	0	819.05	7416.7	4568.15	1295.97
SDHB	0	0	0	0	509.65	294.37	0	0	0	128.475	0	801.875	0	0	0	0	0	0	0	0	0	0	0	0	0	0	0	20634.5	0	7690.25	0	0	0	0	1197.25	439.675	0	5024.7	6333.15	0	0	0	0	0	0	0	0	0	0
SFXN1	0	0	0	0	372.68	410.555	0	1241.31	573.615	2562.2	0	2970.15	0	0	0	0	0	0	0	0	0	0	0	0	0	0	0	55067	232.6	14365	0	0	0	0	2728.8	1995.7	0	11836	4859.3	0	0	0	0	0	0	0	2771.6	278.64	0
SLC25A1	0	0	0	0	2379.9	1007.46	0	0	0	16327.5	0	5882.8	0	0	0	0	0	0	0	0	0	0	0	0	0	0	0	10787.1	55.635	3768.05	0	0	0	0	9465.65	4229.95	0	20496.5	12076	1231.85	0	677.605	0	0	0	0	0	0	0
SLC25A13	0	0	0	0	352.645	308.75	0	0	0	1119.7	0	3032.35	0	0	0	0	0	0	0	0	0	0	62.5015	13.6977	0	0	0	72990	0	20330.5	0	0	0	0	1098.17	2247.85	0	14171	8282.7	1362	0	290.105	69.4165	0	20.5155	0	0	0	0
SLC25A24	0	0	0	0	250.8	143.64	0	0	0	0	0	0	0	0	0	0	0	0	0	0	0	0	0	0	0	0	0	14714	0	7954.55	0	0	0	0	2134.4	518.805	0	3408.85	5699.8	0	0	0	0	0	0	0	0	0	0
SLC39A7	0	0	0	0	2649.55	892.06	0	0	0	882.26	0	604.12	0	0	0	0	0	0	0	0	0	0	0	0	0	0	0	0	0	0	0	0	0	0	2993.75	1341.2	0	3663.45	2509.3	0	0	0	0	0	0	0	0	0	0
SMN1	0	0	0	0	619.815	358.685	0	0	0	2708.45	0	953.465	0	0	0	0	0	0	0	0	0	0	2971.65	1060.95	0	0	0	0	0	0	0	0	0	0	0	0	0	1512.95	619.15	0	0	0	0	0	0	0	0	0	0
SMS	0	0	0	0	701.765	694.115	5939.75	0	1246.4	2779.6	0	3108.7	0	0	0	0	0	0	0	4048.55	1413	0	7972.75	6554.55	0	0	0	0	0	0	0	0	0	0	639.675	1105.43	0	965.46	2241.05	5559.5	0	3196.8	9535.7	0	6987.15	0	0	0	0
SMTN	0	0	0	0	6495.8	5487.95	0	0	0	9856.05	0	12469.5	0	0	0	0	0	0	0	0	0	0	0	0	0	0	0	0	0	0	0	0	0	0	16781	13206	0	21630.5	28040	0	0	0	0	0	0	0	0	0	0
SNX3	0	0	0	0	1174.85	813.915	0	0	0	0	0	0	0	0	0	0	0	0	0	0	0	0	0	0	0	0	0	0	0	0	0	0	0	0	0	0	0	0	0	0	0	0	0	0	0	0	0	0	0
SNX6	0	0	0	0	691.045	1812.55	0	0	0	0	0	0	0	0	0	0	0	0	0	0	0	0	2513.45	1477.9	0	0	0	0	0	0	0	0	0	0	2222.35	592.285	0	2864.95	776.26	0	0	0	2028.85	0	1183.45	0	0	0	0
SOAT1	0	0	0	0	1549.7	854.18	0	0	0	0	0	0	0	0	0	0	0	0	0	0	0	0	0	0	0	0	0	0	0	0	0	0	0	0	3882.25	1528.55	0	4794	1793.45	0	0	0	0	0	0	0	0	0	0
STAT1	0	0	0	0	204.129	1825.75	0	0	0	877.31	0	686.535	0	0	0	0	0	0	0	2039.15	792.345	0	5517.75	6729.55	0	0	0	0	0	0	0	0	0	0	389.91	136.395	0	841.52	419.655	2818.05	0	1176.13	7826.95	0	2668.5	0	0	0	0
STK26	0	0	0	0	1131.1	605.305	0	0	0	0	0	0	0	0	0	0	0	0	0	0	0	0	0	0	1969.25	2089.55	1157.7	2241.95	1673.2	1984.8	0	0	0	0	1330.85	2116.44	0	5307.2	1456.3	0	0	0	0	0	0	0	0	0	0
STOML2	0	0	0	0	1412.8	509.03	0	0	0	11685.5	0	3976.05	0	0	0	0	0	0	0	0	0	0	0	0	0	0	0	4307.6	0	701.045	0	0	0	0	5634.65	3455.7	0	16886	13793	0	0	0	0	0	0	0	0	0	0
SWAP70	0	0	0	0	2804.95	2287.1	3064.3	7228.15	2749.3	0	0	0	0	1432.47	2877.65	3289.05	2477.85	2228.9	0	3004.65	3625.65	0	5915.1	5491.1	0	2510.3	4016.35	6674.45	2711.65	4243.25	0	20282.9	3447.25	0	0	0	0	0	0	3737.15	0	4270.35	3821.9	0	2544.35	246.48	6439.3	6829.35	0
TFB2M	0	0	0	0	1252.6	1187.45	0	0	0	0	0	0	0	0	0	0	0	0	0	0	0	0	0	0	0	0	0	0	0	0	0	0	0	0	1420.55	1475.91	0	1349.85	1343.95	0	0	0	0	0	0	0	0	0	0
TIMM23	0	0	0	0	407.965	204.29	0	0	0	1873.05	0	2394.75	0	0	0	0	0	0	0	0	0	0	0	0	0	0	0	3575	0	1195.7	0	0	0	0	1194.8	4110.25	0	0	0	0	0	0	0	0	0	0	0	0	0
TMED1	0	0	0	0	2281	287.315	0	0	0	0	0	0	0	0	0	0	0	0	0	0	0	0	0	0	0	0	0	0	0	0	0	0	0	0	1156.75	349.065	0	1355.4	922.47	0	0	0	0	0	0	0	0	0	0
TMPO	0	0	0	0	147.81	934.72	0	21844	7826.15	0	0	0	0	2235.85	2792.45	1408.6	6538.1	3392.25	0	0	0	0	0	0	0	5351.4	8231.15	61064	26282	44989.5	22528	37130	26253	0	2485.8	4358.5	0	3640.1	1582.7	0	0	0	0	0	0	9038.75	14028	16489	3831.75
TOMM22	0	0	0	0	1208.9	665.385	0	0	0	0	0	0	0	0	0	0	0	0	0	0	0	0	0	0	0	0	0	12473	0	3547.3	0	0	0	0	9545.85	6942.05	0	1336.59	27987.5	4088.85	0	1759.05	0	0	0	0	0	0	0
TTI2	0	0	0	0	3071.1	910.345	0	0	0	1735.3	0	2005.8	0	0	0	0	0	0	0	2225.65	1196.55	0	0	0	0	0	0	0	0	0	0	0	0	0	4293.55	1741.6	0	2911.3	1647.25	0	0	0	0	0	0	0	0	0	0
TUBB4A	0	0	0	0	6250.1	3231	0	0	0	0	0	0	0	0	0	0	0	0	0	0	0	2330.9	1579.3	1292.45	0	0	0	7741.5	978.37	2731.2	0	0	0	0	8073.65	5977.05	226.01	6317.25	8324.3	0	0	0	0	0	0	0	1741.55	2007.7	0
TXNDC5	0	0	0	0	515.935	239.485	0	0	0	1456.2	0	978.54	0	0	0	0	0	0	0	10434.5	4182.9	0	14457.5	18518	0	0	0	0	0	0	0	0	0	0	316.89	192.88	0	800.48	2748.45	3629.75	0	1446.2	11520	0	5263.75	0	0	0	0
UBE2Z	0	0	0	0	1314.15	1112.75	4752.65	0	1606.25	6104.35	0	2186.41	0	0	0	0	0	0	0	2394.45	1478.45	0	5457	4928.8	0	0	0	446.065	0	281.715	0	0	0	0	0	0	0	2451.4	2999.55	6515	0	2344.25	8299.5	0	4079.3	0	0	0	0
UBR4	0	0	0	0	628.695	1038.88	0	0	0	0	0	0	0	0	0	0	0	0	0	0	0	0	2810.3	2790	2141.6	979.66	0	1470.3	2114.35	621.425	0	0	0	0	1591.25	691.815	0	2134.85	1698	1806.5	0	1812.02	4505.25	0	1906.7	0	0	0	2670.3
UQCRFS1	0	0	0	0	1122.8	1088.09	0	0	0	3943.95	0	5618.7	0	0	0	0	0	0	0	0	0	0	782.27	399.125	0	0	0	3660.15	0	677.38	0	0	0	0	4256.05	3076.35	0	9964.85	8842	1047.15	0	557.905	674.395	0	305.115	0	0	0	0
VDAC3	0	0	0	0	2118.45	1298.82	0	0	0	8022.1	0	5542.4	0	0	0	0	0	0	0	0	0	0	0	0	0	0	0	11428	0	5077.15	0	0	0	0	11999.5	7259.45	0	23703	18599.5	5381.4	0	1392.9	0	0	0	0	0	0	0
VPS25	0	0	0	0	3151.8	1501.55	0	0	0	0	0	0	0	550.88	1316.2	698.6	1257.25	1356.3	0	0	0	0	1919.65	668.125	0	0	0	0	0	0	0	0	0	0	2372.2	1530.85	0	3714.3	2021.3	0	0	0	0	0	0	2438.1	1049.8	1311.9	0
VPS26A	0	0	0	0	702.37	465.99	0	0	0	3617.25	0	2321.15	0	0	0	0	0	0	0	3698.1	1570.65	0	7575.05	5710.35	0	0	0	0	0	0	0	0	0	0	0	0	0	3677.5	3407.4	4080.85	0	1439.95	4983.5	0	2411.35	0	0	0	0
VPS35	0	0	0	0	631.06	292.12	5354.55	0	1127.26	6011.65	0	3280.5	0	0	0	0	0	0	0	7288.15	4618.5	0	18918	12060	0	0	0	1643.85	322.17	1383.26	0	0	0	0	2307.25	1146.1	0	7600.5	4384.4	8707.15	4300.8	3072.4	11020.5	0	6284.45	0	0	0	0
ZGPAT	0	0	0	0	3106.7	1280.2	0	0	0	24975	0	2865.95	0	0	0	0	0	0	0	0	0	0	0	0	0	0	0	0	0	0	0	0	0	0	4265.25	1990.3	0	0	0	0	0	0	0	0	0	0	0	0	0
ZNF841	0	0	0	0	5258.7	4071.05	0	0	0	0	0	0	0	0	0	0	0	0	0	0	0	0	0	0	0	0	0	0	0	0	0	0	0	0	0	0	0	2626.4	5965.8	0	0	0	0	0	0	0	0	0	0
ACTB	0	0	0	0	0	0	1625650	402010	1128800	603310	373730	1361200	0	0	0	0	1328100	643555	293180	1155800	1033050	0	0	0	0	0	0	0	0	0	0	0	0	0	0	0	0	0	0	1226500	683150	1214500	1172750	548405	834850	0	0	0	0
ACTC1	0	0	0	0	0	0	1826200	381535	1647000	722930	431275	1491400	0	0	0	0	0	0	0	0	0	0	0	0	0	0	0	0	0	0	0	0	0	0	0	0	0	0	0	1135600	564525	1284450	1420200	657795	1655800	0	0	0	0
ACTG1	0	0	0	0	0	0	4254850	1407800	3372250	1288050	1703350	2053100	0	0	0	1452300	4004050	2579800	1050500	2508500	2902500	0	0	0	0	0	0	0	0	0	0	0	0	0	0	0	0	0	0	2510550	2618950	2723200	2253650	1456500	3046200	0	0	0	2943250
ACTL6A	0	0	0	0	0	0	568.6	884.5	695.34	0	0	0	0	484.3	242.995	0	3632.65	1282.2	0	0	0	0	0	0	685.565	2119	8548.3	28439	803.205	7540.05	0	0	0	0	0	0	0	0	0	0	0	0	0	0	0	120.14	1540.85	951.18	762.45
ACTL8	0	0	0	0	0	0	30894.5	74050	35626.5	0	0	0	47758	78918	67330.5	57805	86866.5	63727.5	0	0	0	0	0	0	0	0	0	0	0	0	0	0	0	0	0	0	0	0	0	36674	118520	53690.5	26580.5	77201	41125	76885	42132	51698.5	71836.5
ACTR2	0	0	0	0	0	0	37255.5	31823.5	36165.5	47445.5	31919.5	71865	41633.5	45991	42243.5	42329.5	79824	58897.5	7481	69712	57483.5	0	0	0	17680	47704.5	68333.5	21479	71406	51877	44813	45869	40024	0	0	0	0	0	0	40769	40950.5	47588	73325.5	36825	74124	61959	45964	49864.5	64402.5
ADK	0	0	0	0	0	0	2745.65	0	983.81	0	0	0	0	0	0	0	0	0	0	2917.6	1484.25	0	5955.45	4206.65	0	0	0	0	0	0	0	0	0	0	0	0	0	0	0	0	0	0	3068.65	0	3338.45	0	0	0	0
AK4	0	0	0	0	0	0	5521.35	0	5524.2	1527.95	0	1165.27	0	0	0	0	0	0	0	0	0	0	1446.4	1242.39	0	0	0	0	0	0	0	0	0	0	3899.9	719.04	0	0	0	5849.85	0	1157.21	3409.55	0	1049.25	0	0	0	0
APEH	0	0	0	0	0	0	6217	0	1244.35	3520.65	0	2494.8	0	0	0	0	0	0	0	7437.45	4587.4	0	16556	16520.5	0	0	0	0	0	0	0	0	0	0	0	0	0	3943.85	2505.8	4536.7	0	2180.9	7824.15	0	7931	0	0	0	0
APRT	0	0	0	0	0	0	3403.2	0	1442.7	2181.3	0	2840.35	0	0	0	0	3413.51	1349.15	0	4093.6	6142.55	0	13773	9864.3	0	0	0	0	0	0	0	0	0	0	0	0	0	1723.55	1654.4	4663.85	0	1540.45	10639	0	3876	0	0	0	0
ARF5	0	0	0	0	0	0	2615.75	0	1311.05	0	0	0	0	0	0	0	0	0	0	2625.4	1318.11	0	2525.4	4232.1	0	0	0	0	0	0	0	0	0	0	0	0	0	0	0	757.38	0	1541.1	4093.95	0	3153.6	0	0	0	0
ARFGAP1	0	0	0	0	0	0	1663.95	0	745.595	896.55	0	967.58	0	0	0	0	0	0	0	2793.2	1885.05	0	2985.05	3451.45	0	0	0	984.19	0	881.21	0	0	0	0	0	0	0	3645.3	1737.95	0	0	0	1665.6	0	2015.25	0	0	0	0
ARPC3	0	0	0	0	0	0	28976	19366	26404	38996.5	16865	51476	22836	34056	31360	21646.5	54835.5	37876	0	0	0	0	0	0	0	0	0	22615.5	43791.5	33089.5	0	0	0	0	0	0	0	0	0	28975	27977.5	36628.5	41977.5	21861	43707	43386.5	31270	38904.5	44711.5
C1QBP	0	0	0	0	0	0	4522.1	33426	11920	9103.95	81895.5	16276	67486.5	44619	51446.5	32949	2426.95	21043.5	0	0	0	0	14905	9638.75	24042.5	18527.5	21121	23420	53662.5	40193.5	3158.9	29815.5	17460	0	0	0	0	23750	17893.5	8462.75	29818	12194	10059.5	44571.5	16067	30003.5	72593.5	56341.5	41222
CAP1	0	0	0	0	0	0	20968	3270.8	14187	0	0	0	0	0	0	0	0	0	0	0	0	0	0	0	0	0	0	0	0	0	0	0	0	0	0	0	0	0	0	12306.1	6668.5	15759.5	23347	4905.1	22111	0	0	0	0
CFL2	0	0	0	0	0	0	4272.45	0	1263.26	1245.99	0	5247.85	0	2551.35	1273.25	884.375	8478.65	2775.2	0	4997.35	1572.1	0	9875.5	8465.8	0	1045.64	3468.45	0	2840.45	1156.8	0	0	0	0	2874.12	333.63	0	1028.54	1785.22	7613.9	3842.85	4427.1	10347	0	5443.95	2942.25	407.95	1754.9	1138.9
CNN2	0	0	0	0	0	0	167480	13941.5	96071.5	116400	7196.95	169475	0	0	0	0	0	0	0	0	0	0	0	0	0	0	0	0	0	0	0	0	0	0	0	0	0	0	0	0	0	0	215155	15975	169110	0	0	0	0
CNN3	0	0	0	0	0	0	258528	59673	203749	0	0	0	0	0	0	0	0	0	0	0	0	0	0	0	0	0	0	0	0	0	0	0	0	0	0	0	0	0	0	0	0	0	214995	58569	410765	0	0	0	0
COPA	0	0	0	0	0	0	146470	142115	131060	205235	106540	151000	0	0	0	0	0	0	40094	349855	300280	0	0	0	0	0	0	0	0	0	0	0	0	256900	153205	119965	0	0	0	0	0	0	145795	136425	139105	0	0	0	0
COPB2	0	0	0	0	0	0	458600	533275	430760	315245	485795	343200	227050	638560	496390	0	0	0	142200	833165	738740	0	0	0	0	0	0	0	0	0	0	0	0	623910	286245	328010	0	0	0	439635	377940	432530	357190	504550	379740	0	0	0	673920
COPG2	0	0	0	0	0	0	30189.5	15252.5	23516.5	26486	11407	27232.5	0	0	0	0	0	0	431.35	79161	72910.5	105.03	41691	43079.5	0	0	0	0	0	0	0	0	0	24645	21882	22692	0	0	0	32775	9681.55	25633	19556.5	17224	19349	0	0	0	0
COPZ1	0	0	0	0	0	0	228530	226400	220880	133430	230300	110520	120435	298385	270055	0	0	0	79160	303020	277040	0	0	0	0	0	0	0	0	0	0	0	0	0	0	0	0	0	0	116775	190985	137630	0	0	0	0	0	0	344425
CORO1B	0	0	0	0	0	0	46672.5	15134	34846	30402	10904.5	42053	0	0	0	19372	45865.5	30764	0	66088.5	59037	0	55105.5	50591.5	0	0	0	0	0	0	0	0	0	0	0	0	0	0	0	55601	25210	52418	65238.5	10070.5	44422.5	0	0	0	33188
DBN1	0	0	0	0	0	0	83347.5	97.479	50941.5	158840	5759.7	215235	0	0	0	0	0	0	1207.67	139300	176415	0	90665	76567.5	0	0	0	0	0	0	0	0	0	0	0	0	0	0	0	99030.5	1201.64	72402.5	135870	8063.05	92929.5	0	0	0	0
DCXR	0	0	0	0	0	0	2644.6	0	1950.7	4989.9	0	1621.7	0	0	0	0	0	0	0	2010.1	1133.55	0	2920.9	3118.5	0	0	0	0	0	0	0	0	0	0	0	0	0	3461.2	1488.65	1668.6	0	1117.04	2650.1	0	2237.55	0	0	0	0
DDAH1	0	0	0	0	0	0	3576.9	0	1245.05	1008.66	0	1650.1	0	0	0	0	0	0	0	4730.95	513.295	0	10665.5	8767.7	0	0	0	0	0	0	0	0	0	0	0	0	0	947.735	1239.2	2785.2	0	1305.45	4757.6	0	3688.35	0	0	0	0
DENR	0	0	0	0	0	0	19829.5	4781.3	10540.5	26543	2171.45	30401.5	0	0	0	0	0	0	0	0	0	0	0	0	0	0	0	0	0	0	0	0	0	0	0	0	0	0	0	0	0	0	0	0	0	0	0	0	0
DNM1L	0	0	0	0	0	0	25552	0	11920.5	19432.8	0	20358.7	0	0	0	0	0	0	0	7582.4	4432.95	0	7880.65	5836.35	0	0	0	0	0	0	0	0	0	0	0	0	0	584.63	392.185	20254	0	14589.5	16623.6	35.862	13181.4	0	0	0	0
DSP	0	0	0	0	0	0	55132	1702.15	29310.5	32457.5	0	31449	0	0	0	0	0	0	0	0	0	0	0	0	0	0	0	21294.5	2458.95	10591	0	0	0	0	17464	22549.5	0	12755	10171.8	86865.5	881.14	73212	56129.5	1346.35	57866	0	0	0	0
DYSF	0	0	0	0	0	0	16796	0	8475.1	7643.75	0	49034.5	0	0	0	0	0	0	0	4240.95	2447.95	0	2779.4	1251.27	0	0	0	0	0	0	0	0	0	0	427.035	1303.65	0	691.625	5665.05	17638.5	0	14136.5	12308.5	0	9417.65	0	0	0	0
ECI1	0	0	0	0	0	0	3343.85	0	904.375	0	0	0	0	0	0	0	0	0	0	4665.4	2392.65	0	3194.05	8841.7	0	0	0	0	0	0	0	0	0	0	0	0	0	0	0	0	0	0	4979.55	0	2804.5	0	0	0	0
EEF2	0	0	0	0	0	0	41928.5	11268	33717	31057.5	8268	38726	0	0	0	0	0	0	36087	34444.5	35867.5	38746	51345	47367	26459	20141	13800.5	0	0	0	0	0	0	0	0	0	12881	23652.5	21094	42354.5	13731	34622.5	33730.5	12589.5	49030	0	0	0	0
EIF3K	0	0	0	0	0	0	66046.5	93925.5	61867.5	0	0	0	150750	149365	117720	141090	172555	118500	0	0	0	0	0	0	75921	124930	184210	0	0	0	103730	182860	105464	0	0	0	0	0	0	65979	141525	72082	0	0	0	128180	123425	89552.5	153945
ERO1A	0	0	0	0	0	0	2042.65	0	843.6	469.675	0	346.955	0	0	0	0	0	0	0	4825.4	2323.75	0	8143.6	11012.5	0	0	0	0	0	0	0	0	0	0	0	0	0	388.42	941.81	514.325	0	836.115	5423.55	0	2009.3	0	0	0	0
FH	0	0	0	0	0	0	6885.35	0	2478.5	3593.15	0	606.735	0	0	0	392.86	942.84	657.63	0	4236	2782.1	0	10319	12600	0	0	0	0	0	0	0	0	0	0	1141.15	2154.8	0	1559.6	3852.85	3613.4	0	4471.45	14073.5	0	9672.7	365.61	0	667.955	0
FIG4	0	0	0	0	0	0	621885	67326.5	356440	1683450	353550	1207775	0	0	0	85045	536185	294360	0	0	0	0	0	0	0	0	0	0	0	0	0	0	0	0	0	0	0	0	0	1038750	212600	681845	986715	91708	1075800	0	0	0	0
FLNA	0	0	0	0	0	0	757640	73651.5	511735	490790	38923.5	676310	0	0	0	0	0	0	8747	312170	267835	0	0	0	0	0	0	0	0	0	0	0	0	0	0	0	0	0	0	669610	44439	539465	464150	102346	450925	0	0	0	0
GGCT	0	0	0	0	0	0	14227.5	0	19073	6606.4	0	11300.5	0	0	0	0	0	0	0	21699.5	13463	0	27446	72985	0	0	0	11114	18158	19561	0	0	0	0	0	0	0	0	0	17433.5	0	13794	32744	0	23413	0	0	0	0
GLRX3	0	0	0	0	0	0	2334.45	0	2367.4	0	0	0	0	0	0	352.37	1572.42	1021.82	0	2805.65	2902.65	0	9373.4	6692.35	0	0	0	0	0	0	0	0	0	0	0	0	0	3460.35	788.775	547.995	0	1102.21	5963	0	4171.95	0	0	0	0
GMDS	0	0	0	0	0	0	1342.96	0	1202.7	0	0	0	0	0	0	1528.8	466.12	1139	0	2030.45	1581.95	0	3299.55	3856.95	0	0	0	0	0	0	0	0	0	0	0	0	0	0	0	195.682	0	838.765	2504.68	0	1968.35	0	3428.4	1850.7	0
GNPDA1	0	0	0	0	0	0	3840.35	0	773.44	0	0	0	0	0	0	0	0	0	0	4249	2983.3	0	7407.15	11408.5	0	0	0	0	0	0	0	0	0	0	0	0	0	362.345	178.745	2255.95	0	2158.35	4587.7	0	4308.9	0	0	0	0
GPATCH11	0	0	0	0	0	0	9933.3	196135	69047	0	0	0	39293	18964.5	27832.5	26139	19068	21943.5	120465	9467.9	31945.5	106865	0	12151.5	16111.6	33657.5	72238	5778.4	38243.8	41187	368390	19309.5	103560	0	0	0	0	0	0	0	0	0	0	0	0	24068	33092	16833.5	8284.9
GRPEL1	0	0	0	0	0	0	3434.05	0	1545.7	1576.1	0	2141.25	0	0	0	0	0	0	0	2840.15	958.985	0	7777.35	6481.25	0	692.057	429.63	2487.85	238.75	612.49	0	0	0	0	0	0	0	4106.2	1545	835.45	1544.5	1819.75	5367.9	0	4196.35	0	0	0	0
GSR	0	0	0	0	0	0	3114.6	0	995.84	5876.65	0	3194.95	0	0	0	0	0	0	0	3222.75	1279.68	0	8275.5	5557.2	0	0	0	0	0	0	0	0	0	0	1282.65	329.445	0	2802.75	2269.15	3390.8	0	1881.85	6404.3	0	3524.6	0	0	0	0
HAT1	0	0	0	0	0	0	1593.67	0	2155.65	0	0	0	0	0	0	482.35	1819.2	1302	0	5051.65	5311.4	0	7891.65	14803	613.15	898.7	1435.45	943.605	479.72	530.06	0	0	0	0	0	0	0	0	0	4652	0	3569.6	1408	0	3948.69	0	0	0	0
HSPA9	0	0	0	0	0	0	66632	25814.5	45018.5	69585	27557.5	45018	0	0	0	42319	45155	41038	25199.5	48251	43940	22144.5	79699	69369	29805	38186.5	48439	0	0	0	0	0	0	0	0	0	0	0	0	57262	37825	54891	90609.5	20619	81917	47866.5	40297.5	43528.5	46699
HSPE1	0	0	0	0	0	0	21827	18373	18005	0	0	0	0	0	0	18168	38369.5	28776.5	19896	26247.5	27888	35587	17568.5	48296.5	33658	33431	32945	0	0	0	29840	27928	31372.5	0	0	0	0	0	0	0	0	0	29026	22225.5	37005	41267	24932	35055.5	28897.5
IDE	0	0	0	0	0	0	5515.7	0	1925.8	6429.1	0	7589.95	0	0	0	0	0	0	0	0	0	0	3735.85	11091.7	0	0	0	0	0	0	0	0	0	0	0	0	0	17485.5	5467	0	0	0	14908.5	0	5856.55	0	0	0	0
LAD1	0	0	0	0	0	0	59930.5	17567.5	38091.5	216590	3925.15	155085	0	0	0	0	0	0	3558.95	51717.5	38162	4751.1	36969	27623	0	0	0	34651	3901.5	17905	0	0	0	0	0	0	0	0	0	51848	4654.1	44821	66624.5	4610.7	47948	0	0	0	0
LANCL1	0	0	0	0	0	0	1044.1	0	1544.75	0	0	0	1860	2796.35	2054.45	1053.49	1739.6	1693.95	0	2900.5	2093.6	0	0	0	1978.2	2716.55	2255	1751.75	1922.35	2051.1	0	0	0	0	0	0	0	0	0	0	0	0	0	0	0	2567.55	2263.2	2324.55	2139.75
LAP3	0	0	0	0	0	0	2556.85	0	796.485	781.82	0	894.685	0	0	0	0	0	0	0	1854.15	630.215	0	9655.05	6196.6	0	0	0	0	0	0	0	0	0	0	266.885	492.25	0	1693.35	1476.45	3152.3	0	1332.65	8462.65	0	2962.25	0	0	0	0
MCCC2	0	0	0	0	0	0	2266.9	0	2305	4795.2	0	2718.9	0	0	0	640.49	529.64	604.94	0	2342.1	1078.81	0	4724.35	5184	1223.55	1098.95	1972.55	1278.3	1235.45	1818	0	0	0	0	1100.55	819.575	0	1979.2	2731.65	5444.9	0	4690.7	6958.6	0	5621.15	1199.25	0	887.95	0
MRPS10	0	0	0	0	0	0	5474.75	0	6208.6	0	0	0	0	0	0	3085.95	8330.8	2069.55	0	0	0	0	0	0	0	0	0	0	0	0	0	0	0	0	0	0	0	12603.5	5255.8	0	0	0	0	0	0	843.38	7231.85	3293.7	0
NACA	0	0	0	0	0	0	50030	9660.85	29847	0	0	0	0	0	0	0	0	0	0	0	0	0	34405.5	31877.5	0	0	0	0	0	0	0	0	0	0	0	0	0	0	0	47682.5	9637.6	36778	47957	13772.5	39858.5	0	0	0	0
NAPA	0	0	0	0	0	0	2067.05	0	1763.25	0	0	0	0	609.095	402.34	1737.45	764.96	1146.3	0	0	0	0	2867.95	2041.35	280.82	797.41	978.775	17225	218.51	5348.15	0	0	0	0	0	0	0	657.405	1995.65	2621.9	0	2402.85	3953.9	0	2900.95	0	0	0	0
NELFB	0	0	0	0	0	0	27545.5	34217.5	33341	0	0	0	0	0	0	0	0	0	0	0	0	0	0	0	0	0	0	0	0	0	0	0	0	0	0	0	0	0	0	0	0	0	0	0	0	0	0	0	0
NPEPPS	0	0	0	0	0	0	2173.55	0	1045.76	649.14	0	326.335	0	0	0	0	0	0	0	4707.3	2538.55	0	8896	10917.5	0	0	0	0	0	0	0	0	0	0	0	0	0	886.655	573.435	860.765	0	1132.86	7502.35	0	4604.1	0	0	0	0
NUTF2	0	0	0	0	0	0	8620.25	0	753.955	2499.3	0	3017.55	0	0	0	0	0	0	0	7655.35	4575.8	0	23120.5	15522.5	0	0	0	2495.7	0	568.61	0	0	0	0	0	0	0	0	0	3174.25	0	5094.85	6771.95	0	8509.35	0	0	0	0
OAT	0	0	0	0	0	0	12624.5	0	4337.75	7096.9	0	3370.7	0	0	0	0	0	0	0	5185	3490.45	271.48	14302	10916.5	0	0	0	0	0	0	0	0	0	0	0	0	0	0	0	10405	0	5625.7	14739	0	12512.5	0	0	0	0
PDLIM2	0	0	0	0	0	0	8664.05	0	7318	3588.2	0	1654.71	0	0	0	0	0	0	0	19370.5	9571.85	0	3321.4	5966.95	0	0	0	0	0	0	0	0	0	0	0	0	0	0	0	4376.75	0	6113.8	12357.5	0	12775.5	0	0	0	0
PLEC	0	0	0	0	0	0	52936.5	277.828	37201	38233.6	44.339	40697.5	0	0	0	0	0	0	0	29816.5	29538.8	0	16473	18773.6	0	0	0	0	0	0	0	0	0	0	20983.5	19746	35.515	18858.6	15725.8	81346.5	24.924	75184	62821.5	2834.2	62396	0	0	0	0
PMM2	0	0	0	0	0	0	1441.7	2108.9	2568.55	6122.9	2129.55	0	0	6806.95	3089.1	1460.8	2995.2	2458.8	0	2495.85	2402.85	0	3200.45	2808.55	2263.3	2591.75	0	965.26	3853.3	2044.2	0	0	0	0	0	0	0	0	0	0	0	0	3126.25	0	1653.3	0	0	0	3516.1
PMPCB	0	0	0	0	0	0	5691.8	0	2148.8	14704	0	7915.25	0	0	0	0	0	0	0	0	0	0	1851.65	920.255	0	0	0	0	0	0	0	0	0	0	0	0	0	5319.1	3206.85	12393.5	0	8924.65	11562	0	8725.95	0	0	0	0
PNP	0	0	0	0	0	0	2267.4	0	1594.8	1415.58	0	2434	0	0	0	0	0	0	0	3621.7	2036.85	0	12632	8956.15	0	0	0	0	0	0	0	0	0	0	0	0	0	584.035	1518.96	3310.3	0	1231	9371.9	0	3308.6	0	0	0	0
PPP2R2A	0	0	0	0	0	0	4028.1	0	4310	0	0	0	3684.9	2590.05	2900.1	3174.1	4155.15	4272.7	0	6085.6	5426.95	0	4116.15	8201.4	0	0	0	0	0	0	0	0	0	0	0	0	0	0	0	2261.15	0	2417	3523.4	0	3657.8	4100.9	5051.05	5513.25	3035.7
PRDX2	0	0	0	0	0	0	27698.5	26751	24036.5	26348	32026.5	22283	0	0	0	0	0	0	25990	56972.5	45081.5	29343	69775.5	35728	0	0	0	0	0	0	0	0	0	0	0	0	0	0	0	0	0	0	0	0	0	0	0	0	0
PTPRS	0	0	0	0	0	0	166580	17131	63432.5	269215	3413.15	155860	0	0	0	0	0	0	0	66592.5	66469.5	0	0	0	0	0	0	0	0	0	0	0	0	0	181880	127165	1474.1	249090	268610	497610	7781.8	285855	249690	7059.45	169535	0	0	0	0
PYCR1	0	0	0	0	0	0	26992	25618.5	19693.5	0	0	0	0	0	0	0	0	0	0	0	0	0	0	0	0	0	0	28631.5	36629	35954	0	0	0	0	0	0	0	0	0	0	0	0	0	0	0	0	0	0	0
QDPR	0	0	0	0	0	0	2238.1	0	1169.98	0	0	0	0	0	0	0	0	0	0	0	0	0	7298.7	2211.25	0	0	0	0	0	0	0	0	0	0	0	0	0	0	0	2562.8	0	1537.72	3522.7	0	2017.35	0	0	0	0
RAB6A	0	0	0	0	0	0	28880	11909	24802	0	0	0	0	0	0	0	0	0	13460.5	22487	22579	0	0	0	24281.5	21350.5	14533.5	56352.5	11855.5	35833	0	0	0	0	0	0	0	0	0	0	0	0	0	0	0	0	0	0	0
RFC2	0	0	0	0	0	0	19554	0	7003.1	0	0	0	13250	3830.65	7115.1	7548.25	12721	9332.35	0	12629	18674	0	0	0	2646.35	9188.15	8953.15	10064.5	8389.1	8664.6	0	0	0	0	0	0	0	0	0	0	0	0	0	0	0	3559.05	14120.5	10796	0
RFLNA	0	0	0	0	0	0	7782.2	0	2016.75	10728.8	0	13105	0	0	0	0	0	0	0	33016.5	18954	0	27462	20173	0	0	0	0	0	0	0	0	0	0	0	0	0	3890.35	3026.75	11281	0	7682.2	7008.65	0	6056.75	0	0	0	0
RSU1	0	0	0	0	0	0	1895.4	0	1333.7	0	0	0	0	0	0	0	0	0	0	0	0	0	0	0	0	0	0	7868.6	0	3964	0	0	0	0	0	0	1715.6	2955.3	1489.2	0	0	0	0	0	0	0	0	0	0
SLC25A10	0	0	0	0	0	0	10366.4	7343.7	7042.5	20447.5	0	10714.5	0	0	0	0	0	0	0	0	0	0	0	0	0	0	0	37823.5	0	9262.45	49049	11259.1	2527.8	27993	8916.35	8792.35	0	50713.5	36247	0	0	0	0	0	0	0	0	0	0
SRM	0	0	0	0	0	0	2102.85	0	669.73	0	0	0	0	0	0	0	0	0	0	1530.15	932.26	0	1089.1	2801.75	0	0	0	0	0	0	0	0	0	0	0	0	0	0	0	0	0	0	1461.68	0	2376.7	0	0	0	0
ST13	0	0	0	0	0	0	7831.8	0	8091.35	3120.2	0	1503.9	0	0	0	3358.3	3834	3372.4	0	10571.6	14314.5	0	11253	28545.5	6420	3238.35	3173	7311.65	276.17	4002.1	0	0	0	0	1501.6	3031.4	0	6065.3	4450.4	1665.8	0	7481.6	14135	0	12776.9	2635.45	1150.1	2061.6	0
STIP1	0	0	0	0	0	0	49955.5	50551	47851.5	0	0	0	0	0	0	0	0	0	0	0	0	0	0	0	0	0	0	0	0	0	0	0	0	0	0	0	0	0	0	42129	61394.5	48116	71566	45572	64657.5	0	0	0	0
TAGLN2	0	0	0	0	0	0	78370.5	12175	64345	0	0	0	0	0	0	0	0	0	0	0	0	0	0	0	0	0	0	0	0	0	0	0	0	0	0	0	0	0	0	0	0	0	72680	14724.5	86504	0	0	0	0
TES	0	0	0	0	0	0	1839.1	0	1576.4	6053.95	0	1584.15	0	0	0	0	0	0	0	2145.6	2494.4	0	6644.7	4639.9	0	0	0	0	0	0	0	0	0	0	0	0	0	4773.35	1082.85	1331.8	0	1260.95	5568.3	0	2771.55	0	0	0	0
TLN1	0	0	0	0	0	0	3045.05	0	509.235	1540.95	0	369.7	0	78.838	202.76	0	411.285	361.915	0	3688.7	1410.5	0	9886.15	7624.35	0	0	0	0	0	0	0	0	0	0	166.185	166.085	0	1893.2	685.565	2881.35	0	1850.7	7898.45	0	4030.8	0	0	0	0
TMED5	0	0	0	0	0	0	10150.5	0	2909.95	1799.05	0	5558.55	0	0	0	0	0	0	0	0	0	0	5689.15	4079.65	0	0	0	0	0	0	0	0	0	0	0	0	0	0	0	8915.1	0	7667.3	8217.85	0	7372.3	0	0	0	0
TMOD3	0	0	0	0	0	0	13362	15166.5	11980.5	29735	29336.5	20205.5	37465.5	52509	44534	31074	85287	53733.5	14682.5	12661	12166.5	0	0	0	15966.5	45546.5	72922	18363.5	54389.5	36621.5	16277	44309.5	35260	0	0	0	0	0	0	10114	27919	13938.5	8442.3	17828	10924.6	39318.5	32324	35929.5	42237.5
TRAP1	0	0	0	0	0	0	7820.4	0	6166.95	0	0	0	0	0	0	0	0	0	0	11696.6	6679.8	0	12929	21968	0	0	0	0	0	0	0	0	0	0	0	0	0	0	0	0	0	0	11852	0	18002.5	0	0	0	0
TRIM28	0	0	0	0	0	0	15369	2908.7	10653	0	0	0	0	0	0	0	0	0	2038	16314.5	15968.5	3169.85	26018	18103.5	15889.5	11277.5	8959.05	0	0	0	0	0	0	0	0	0	13610.5	8621.75	12190.5	14935.5	3199.75	15202.5	13381	4801.3	17344.5	0	0	0	0
USP5	0	0	0	0	0	0	2814.04	0	670.06	0	0	0	0	0	0	208.485	423.83	207.63	0	5565.85	3286.8	0	20147.5	19669	0	0	0	0	0	0	0	0	0	0	378.79	218.369	0	1617.74	2122.9	1483.1	0	1068.3	11284.5	0	4966.05	0	0	0	0
VAMP8	0	0	0	0	0	0	695.12	0	577.01	0	0	0	0	0	0	0	0	0	0	0	0	0	669.495	517.72	0	0	0	0	0	0	0	0	0	0	0	0	0	0	0	0	0	0	642.265	0	681.3	0	0	0	0
VCL	0	0	0	0	0	0	1198.3	0	344.975	275.68	0	748.96	0	1999.25	5132.6	2879.65	2250.75	1392.5	0	15047	9851.35	0	16539.5	16755.5	0	0	0	506.885	2259.7	132.631	0	0	0	0	122.58	421.075	0	192.705	125.965	1452.95	0	2434.45	11248.9	0	8126.4	0	0	0	0
YWHAB	0	0	0	0	0	0	29189.5	13244	31344	49988.5	18732	31488.5	0	0	0	0	0	0	29475.5	29677	28898	25209.5	38189	39059	32890	29439	19741	39738.5	17404	28101	0	0	0	0	0	0	8370.7	58839.5	27395	28819	12895.5	24132	49000	12559.5	28565.5	0	0	0	0
YWHAE	0	0	0	0	0	0	79331	23568	51415	74099.5	37605	74115	0	0	0	0	0	0	42862	95659.5	78623.5	40877	143835	119505	0	0	0	76126.5	40647.5	59502	0	0	0	0	0	0	0	0	0	0	0	0	108645	31118.5	90502	0	0	0	0
YWHAZ	0	0	0	0	0	0	57807	13340	44439	0	0	0	0	0	0	0	0	0	21758	46947	43213	13449	84607.5	59898.5	0	0	0	0	0	0	0	0	0	0	0	0	0	0	0	51890	15607.5	35626.5	68062	10699.7	54282	0	0	0	0
AASDHPPT	0	0	0	0	0	0	0	0	0	4695.2	0	3274.35	0	0	0	0	0	0	0	0	0	0	2970.25	1412.95	0	0	0	0	0	0	0	0	0	0	0	0	0	2811.85	1392.25	0	0	0	0	0	0	0	0	0	0
ABCF1	0	0	0	0	0	0	0	0	0	5350.15	0	5667.2	0	0	0	0	0	0	0	0	0	0	0	0	0	0	0	0	0	0	0	0	0	0	0	0	0	0	0	0	0	0	0	0	0	0	0	0	0
ACACA	0	0	0	0	0	0	0	0	0	821.7	0	1011.22	0	0	0	0	0	0	0	1122.99	1574.8	0	5688.95	2851.55	0	0	0	0	0	0	0	0	0	0	602.415	644.69	0	1030.43	1331.21	2302.75	0	1090.25	4079.25	0	1044.75	0	0	0	0
ACOT7	0	0	0	0	0	0	0	0	0	3440.15	0	629.79	0	0	0	0	0	0	0	1322.45	1230.15	0	4081.5	2481.45	0	0	0	0	0	0	0	0	0	0	0	0	0	1493.25	617.795	1659.1	0	630.62	4000.65	735.39	1248.1	0	0	0	0
ACOX1	0	0	0	0	0	0	0	0	0	907.065	0	822.185	0	0	0	0	0	0	0	0	0	0	951.38	405.335	0	0	0	0	0	0	0	0	0	0	0	0	0	795.38	570.785	0	0	0	0	0	0	0	0	0	0
ACTBL2	0	0	0	0	0	0	0	0	0	139095	0	81169	0	0	0	0	0	0	0	0	0	0	40703.5	13123.5	0	0	0	0	0	0	0	0	0	0	0	0	0	0	0	0	0	0	7443.65	0	5970.05	0	0	0	0
ACTN4	0	0	0	0	0	0	0	0	0	171030	6619.25	237395	0	0	0	0	0	0	1934.1	140455	114955	0	0	0	0	0	0	0	0	0	0	0	0	0	0	0	0	0	0	0	0	0	172710	21367.5	142910	0	0	0	0
ACTR3	0	0	0	0	0	0	0	0	0	108665	21766	101915	0	0	0	28312.5	59130	38319	6820.4	51257.5	43180.5	0	0	0	0	0	0	0	0	0	0	0	0	0	0	0	0	0	0	51823.5	26975.5	31510	89742	24135	57961.5	42489.5	27823.5	29739.5	42708
AFG3L2	0	0	0	0	0	0	0	0	0	4398.65	0	5415.05	0	0	0	0	0	0	0	0	0	0	0	0	0	0	0	0	0	0	0	0	0	0	6849.3	5639.85	0	42382	25209.5	0	0	0	0	0	0	0	0	0	0
ALDH5A1	0	0	0	0	0	0	0	0	0	4687.05	0	2333.4	0	0	0	0	0	0	0	0	0	0	2436.7	3488.65	0	0	0	0	0	0	0	0	0	0	863.965	909.19	0	778.18	1590.55	1955.8	0	2241.5	3751.3	0	2897.2	0	0	0	0
ANKLE2	0	0	0	0	0	0	0	0	0	4817.75	0	6562.85	0	0	0	0	0	0	0	0	0	0	0	0	0	0	0	0	0	0	0	0	0	0	0	0	2942	3445.7	3840.8	0	0	0	0	0	0	0	0	0	0
ANO10	0	0	0	0	0	0	0	0	0	4694.1	0	3243.6	0	0	0	0	0	0	0	0	0	0	0	0	0	0	0	0	0	0	0	0	0	0	0	0	0	0	0	0	0	0	0	0	0	0	0	0	0
APEX1	0	0	0	0	0	0	0	0	0	17830	0	11832	0	0	0	0	0	0	0	0	0	0	0	0	0	0	0	0	0	0	0	0	0	0	0	0	0	0	0	0	0	0	0	0	0	0	0	0	0
APMAP	0	0	0	0	0	0	0	0	0	11418.5	5157.15	10167	0	0	0	0	0	0	0	0	0	0	0	0	0	0	0	0	0	0	0	0	0	0	0	0	0	0	0	0	0	0	0	0	0	0	0	0	0
APOA1	0	0	0	0	0	0	0	0	0	1752.8	0	1814.65	0	0	0	0	0	0	0	0	0	0	4826.3	4974.6	0	0	0	0	0	0	0	0	0	0	1494.95	1690.3	0	2774.9	2010.45	2016.6	0	1496.8	3470	0	1869.65	0	0	0	0
ARPC1B	0	0	0	0	0	0	0	0	0	47226	17153.5	47032.5	0	0	0	18797	43549	23613.5	0	0	0	0	0	0	0	0	0	0	0	0	0	0	0	0	0	0	0	0	0	28587.5	20024.5	23777.5	49094	13574.5	32591	0	0	0	27577
ARPC2	0	0	0	0	0	0	0	0	0	43958	20410	41825	23674.5	24671.5	27107.5	23486	41143.5	32640.5	0	0	0	0	0	0	0	0	0	0	0	0	0	0	0	0	0	0	0	0	0	21902.5	22060.5	18103.5	36157.5	20433	32628	32871	23194	27320	33178
ASNS	0	0	0	0	0	0	0	0	0	1713.85	0	837.68	0	0	0	0	0	0	0	0	0	0	6289.95	3449.8	0	0	0	0	0	0	0	0	0	0	0	0	0	0	0	0	0	0	5743.6	0	3798.7	0	0	0	0
ATP5MJ	0	0	0	0	0	0	0	0	0	8270.25	0	6550.9	0	0	0	0	0	0	0	0	0	0	0	0	0	0	0	1682.45	0	307.625	0	0	0	0	2332.3	710.715	0	7518.2	4875.05	0	0	0	0	0	0	0	0	0	0
BAG6	0	0	0	0	0	0	0	0	0	3188.25	0	1839.8	0	0	0	0	0	0	0	0	0	0	0	0	0	0	0	2938.05	931.81	2274.4	0	0	0	0	0	0	0	0	0	0	0	0	0	0	0	0	0	0	0
BASP1	0	0	0	0	0	0	0	0	0	2189.36	0	390.06	0	0	0	0	0	0	0	0	0	0	1834.3	1163.96	0	0	0	4134.85	0	1930.5	0	0	0	0	0	0	0	8519.1	12188	0	0	0	0	0	0	0	0	0	0
BIN1	0	0	0	0	0	0	0	0	0	3638.7	0	1207.4	0	0	0	0	0	0	0	2019.6	1203.59	0	5637.6	4663.55	0	0	0	0	0	0	0	0	0	0	0	0	0	1377.4	719.06	5128.6	0	997.72	4951	0	2349.9	0	0	0	0
BLVRB	0	0	0	0	0	0	0	0	0	743.205	0	998.1	0	0	0	1050.6	2053.6	1183.3	0	4018.8	3710.6	0	9321.1	7977.8	0	0	0	0	0	0	0	0	0	0	420.405	537.29	0	1519.1	1955.35	2137.3	0	921.865	5275.45	0	4350.8	0	0	0	0
CAPZA1	0	0	0	0	0	0	0	0	0	56403	47429	57864.5	0	0	0	52392	64748.5	54703.5	0	0	0	0	0	0	0	0	0	0	0	0	60730.5	61086.5	60576.5	0	0	0	0	0	0	36030.5	70693.5	39206	58596	44717.5	63350.5	54306.5	61402	56960	54177
CAPZB	0	0	0	0	0	0	0	0	0	42240.5	40941	31756.5	42654	48315	42868	38906.5	50673.5	41088.5	0	0	0	0	0	0	0	0	0	0	0	0	44826.5	48963.5	55046	0	0	0	0	0	0	0	0	0	41085	24978	34565	42947.5	47611.5	38907.5	43048
CAST	0	0	0	0	0	0	0	0	0	41794.5	234.994	34611.5	0	0	0	0	0	0	0	0	0	0	0	0	0	0	0	56631.5	5880.6	26838.5	0	0	0	0	0	0	0	40281.5	33744	0	0	0	0	0	0	0	0	0	0
CNIH4	0	0	0	0	0	0	0	0	0	3694.5	0	1370.35	0	0	0	0	0	0	0	0	0	0	0	0	0	0	0	0	0	0	0	0	0	0	0	0	0	0	0	0	0	0	0	0	0	0	0	0	0
CNOT1	0	0	0	0	0	0	0	0	0	4305.3	0	990.53	0	0	0	0	0	0	0	0	0	0	690.845	847.205	0	0	0	0	0	0	0	0	0	0	0	0	0	2599.05	1235.74	0	0	0	0	0	0	0	0	0	0
CSRP2	0	0	0	0	0	0	0	0	0	5676.8	0	3038.55	0	0	0	0	0	0	0	1985.69	1573.5	0	1644.95	2078.8	0	696.32	2960.45	645.205	2220.55	1475.05	0	0	0	0	0	0	0	0	0	0	0	0	633.125	0	1090.1	0	0	0	0
CTSC	0	0	0	0	0	0	0	0	0	1763.8	0	267.725	0	0	0	0	0	0	0	1170.88	603.685	0	2873.95	5083.35	0	0	0	0	0	0	0	0	0	0	0	0	0	760.185	438.055	0	0	0	2665.5	0	1618.45	0	0	0	0
CYC1	0	0	0	0	0	0	0	0	0	9738.2	0	6316.4	0	0	0	0	0	0	0	0	0	0	0	0	0	0	0	2037.4	0	524.95	0	0	0	0	1011.06	341.315	0	8579.4	6211.8	0	0	0	0	0	0	0	0	0	0
DDOST	0	0	0	0	0	0	0	0	0	10927.3	0	2723.15	0	0	0	0	0	0	0	0	0	0	0	0	0	0	0	33430	1058.3	16423.5	0	0	0	0	0	0	0	0	0	0	0	0	0	0	0	0	0	0	0
DIAPH1	0	0	0	0	0	0	0	0	0	3846.7	0	1184.55	0	0	0	0	0	0	0	0	0	0	7833.75	3387.45	0	0	0	0	0	0	0	0	0	0	0	0	0	2239.25	1545.15	3824.9	0	1388.47	5096.15	0	2653	0	0	0	0
DLAT	0	0	0	0	0	0	0	0	0	4412.85	0	6460.35	0	0	0	0	0	0	0	0	0	0	0	0	0	0	0	94910	0	38608	0	0	0	0	3197.2	1898	0	13483	21967	0	0	0	0	0	0	0	0	0	0
DLST	0	0	0	0	0	0	0	0	0	517.44	0	340.365	0	0	0	0	0	0	0	0	0	0	0	0	0	0	0	12008	0	5924.55	0	0	0	0	534.19	703.2	0	7708.9	10818.4	645.425	0	510.825	0	0	0	0	0	0	0
DPP3	0	0	0	0	0	0	0	0	0	1954.8	0	1485.35	0	0	0	0	0	0	0	2894.95	131.892	0	12781	8859.5	0	0	0	0	0	0	0	0	0	0	511.98	1052.81	0	1677.45	1693.15	3418.3	0	502.502	8984.2	0	3583.45	0	0	0	0
EFHD2	0	0	0	0	0	0	0	0	0	4226.4	0	1865.9	0	0	0	0	0	0	0	1113.1	450.76	0	1438.45	976.285	0	0	0	0	0	0	0	0	0	0	0	0	0	646.745	1240.87	0	0	0	0	0	0	0	0	0	0
EPN3	0	0	0	0	0	0	0	0	0	1053.83	0	894.86	0	0	0	0	0	0	0	0	0	0	1642.7	599.65	0	0	0	0	0	0	0	0	0	0	0	0	0	2136.9	994.96	0	0	0	0	0	0	0	0	0	0
ERP44	0	0	0	0	0	0	0	0	0	7271.25	0	2141.9	0	0	0	0	0	0	0	1281.61	1126.64	0	8381.9	4971.85	0	0	0	0	0	0	0	0	0	0	0	0	0	6818.45	3220.8	0	0	0	6252.55	0	1471.9	0	0	0	0
ESPN	0	0	0	0	0	0	0	0	0	5067.65	0	1843.1	0	0	0	0	0	0	0	0	0	0	0	0	0	0	0	0	0	0	0	0	0	0	0	0	0	0	0	0	0	0	0	0	0	0	0	0	0
FAM3C	0	0	0	0	0	0	0	0	0	6488.05	0	8292.75	0	0	0	0	0	0	0	0	0	0	0	0	0	0	0	3301.85	0	614.505	0	0	0	0	889.445	849.25	0	0	0	0	0	0	0	0	0	0	0	0	0
FAM83H	0	0	0	0	0	0	0	0	0	12947.5	0	13402	0	0	0	0	0	0	0	0	0	0	0	0	0	0	0	0	0	0	0	0	0	0	6036.4	3898.9	9980.6	7634.5	4336	10544.5	0	7131	7827.4	0	5387.7	1006.2	1851.5	5512.25	0
FILIP1L	0	0	0	0	0	0	0	0	0	16710	0	5900	0	0	0	0	0	0	0	0	0	0	2219.8	779.695	0	0	0	0	0	0	0	0	0	0	0	0	0	1260.9	1465.8	3965.6	0	938.285	3866.85	0	1788.45	0	0	0	0
FLII	0	0	0	0	0	0	0	0	0	2467.55	0	1715.05	0	0	0	0	0	0	0	0	0	0	0	0	0	0	0	0	0	0	0	0	0	0	0	0	0	0	0	0	0	0	0	0	0	0	0	0	0
FSCN1	0	0	0	0	0	0	0	0	0	6567.65	0	5710.4	0	0	0	0	0	0	0	0	0	0	1139.5	379.405	0	0	0	0	0	0	0	0	0	0	0	0	0	0	0	0	0	0	8273	0	2222.15	0	0	0	0
FUBP1	0	0	0	0	0	0	0	0	0	5151.45	0	5532.35	1790.2	4320.75	3045.95	1091.4	7528.5	1576.2	0	0	0	0	815.285	492.45	1511.2	4510.75	5703.05	42974.5	4631.35	23894	687.6	10413.6	10743.1	0	0	0	0	2908.65	2052.1	6765.8	0	1248.25	0	0	0	2739.85	15695.5	6278.1	2238.9
GNAI2	0	0	0	0	0	0	0	0	0	2279.4	0	1559.75	0	0	0	0	0	0	0	3038.9	1498.95	0	1378.2	2644.05	0	0	0	1996	0	675.515	0	0	0	0	1036.35	1332.85	0	7366.45	2366.25	1838.3	0	2471.1	0	0	0	0	0	0	0
GOT1	0	0	0	0	0	0	0	0	0	1031.75	0	2953.95	0	0	0	0	0	0	0	6037.3	4379.95	0	29419	17863.5	0	0	0	0	0	0	0	0	0	0	0	0	0	1817.4	2300.8	1486.05	0	539.165	9481.2	0	6587.65	0	0	0	0
HEBP1	0	0	0	0	0	0	0	0	0	1682.55	0	1036.15	0	0	0	0	0	0	0	0	0	0	5655.45	2750.35	0	0	0	0	0	0	0	0	0	0	0	0	0	4177.15	1854.15	0	0	0	0	0	0	0	0	0	0
HIP1R	0	0	0	0	0	0	0	0	0	5591.8	0	765.74	0	0	0	0	0	0	0	0	0	0	0	0	0	0	0	0	0	0	0	0	0	0	0	0	0	0	0	0	0	0	0	0	0	0	0	0	0
HMGCS2	0	0	0	0	0	0	0	0	0	3999.45	0	640.04	0	0	0	0	0	0	0	6870	3358.45	0	21462.5	14397	0	0	0	0	0	0	0	0	0	0	0	0	0	1150.81	1944.12	3371	0	831.305	4701.85	0	2542.65	0	0	0	0
HNMT	0	0	0	0	0	0	0	0	0	789.235	0	585.885	0	0	0	0	0	0	0	0	0	0	3728.05	1387.3	0	0	0	0	0	0	0	0	0	0	0	0	0	0	0	0	0	0	0	0	0	0	0	0	0
IDH3A	0	0	0	0	0	0	0	0	0	3086.9	0	524.495	0	0	0	0	0	0	0	0	0	0	1116.15	757.435	0	0	0	0	0	0	0	0	0	0	1474.8	628.83	0	1302.75	1551	0	0	0	1588.35	0	743.58	0	0	0	0
INF2	0	0	0	0	0	0	0	0	0	3755.8	0	6476.2	0	5743.85	1502.1	2487.9	903.61	1409.8	7438.8	5177.3	2549.35	10661	9719.2	8241.2	0	0	0	0	6497.45	1772.5	0	0	0	0	0	0	0	0	0	5029.2	0	3575	0	0	0	0	0	0	0
ITPKA	0	0	0	0	0	0	0	0	0	6589.65	0	1962.6	0	0	0	0	0	0	0	0	0	0	2012.25	1107.23	0	0	0	0	0	0	0	0	0	0	0	0	0	0	0	0	0	0	835.555	0	1288.75	0	0	0	0
KIAA1671	0	0	0	0	0	0	0	0	0	37118.5	0	20413.5	0	0	0	0	0	0	0	0	0	0	0	0	0	0	0	0	0	0	0	0	0	0	0	0	0	0	0	0	0	0	0	0	0	0	0	0	0
LMCD1	0	0	0	0	0	0	0	0	0	3632.2	0	1961	0	0	0	0	0	0	0	0	0	0	0	0	0	0	0	0	0	0	0	0	0	0	0	0	0	0	0	0	0	0	0	0	0	0	0	0	0
LMNA	0	0	0	0	0	0	0	0	0	7040.6	0	2755.95	0	0	0	0	0	0	0	0	0	0	0	0	0	0	0	0	0	0	0	0	0	0	6543.7	961.085	0	6712.7	2557.3	0	0	0	0	0	0	0	0	0	0
LMNB1	0	0	0	0	0	0	0	0	0	81.928	0	155.58	0	0	0	0	0	0	0	0	0	0	0	0	0	0	0	0	0	0	0	0	0	0	0	0	0	72.6465	73.509	0	0	0	0	0	0	0	0	0	0
LPP	0	0	0	0	0	0	0	0	0	11722.2	0	6232.45	0	0	0	0	0	0	0	4637.7	2270.15	0	2210.85	3109.5	0	0	0	0	0	0	0	0	0	0	0	0	0	0	0	0	0	0	3205.75	0	2610.6	0	0	0	0
LRBA	0	0	0	0	0	0	0	0	0	646.19	0	554.795	0	0	0	0	0	0	0	0	0	0	1293.25	599.92	0	0	0	0	0	0	0	0	0	0	0	0	0	0	0	0	0	0	0	0	0	0	0	0	0
LSS	0	0	0	0	0	0	0	0	0	1269.5	0	460.695	0	0	0	0	0	0	0	0	0	0	3586.9	1197.35	0	0	0	0	0	0	0	0	0	0	0	0	0	1968.1	521.71	0	0	0	1357.62	0	683.74	0	0	0	0
LTN1	0	0	0	0	0	0	0	0	0	32977	0	37245.5	0	0	0	0	0	0	0	0	0	0	0	0	0	0	0	0	0	0	0	0	0	0	715.825	2610.55	0	8523.75	1894.15	18021.5	0	1694	8444.85	228.49	1256.8	0	0	0	0
MACF1	0	0	0	0	0	0	0	0	0	63171	0	32637	0	0	0	0	0	0	0	0	0	0	0	0	0	0	0	0	0	0	0	0	0	0	0	0	0	0	0	32967	0	7888.05	28447.5	0	13415.5	0	0	0	0
ME1	0	0	0	0	0	0	0	0	0	6826.7	0	527.025	0	0	0	0	0	0	0	2338.05	798.575	0	5611.6	4017.6	0	0	0	0	0	0	0	0	0	0	0	0	0	2509.15	726.95	918.45	0	1288.8	6546.7	0	3186.25	0	0	0	0
MEMO1	0	0	0	0	0	0	0	0	0	1845.6	0	744.375	0	0	0	0	0	0	0	647.77	843.38	0	1969.75	845.385	0	0	0	0	0	0	0	0	0	0	0	0	0	0	0	826.64	0	1032.49	1216.14	0	1281.9	0	0	0	0
MPST	0	0	0	0	0	0	0	0	0	2140.4	0	1635.8	0	0	0	0	0	0	0	0	0	0	4247.75	3309.25	0	0	0	0	0	0	0	0	0	0	0	0	0	0	0	0	0	0	4097.65	0	1826	0	0	0	0
MRPL14	0	0	0	0	0	0	0	0	0	2105.6	0	1527.85	0	0	0	0	0	0	0	0	0	0	0	0	0	0	0	9073.55	384.42	4331.9	0	0	0	0	1067.5	438.97	0	5014.1	2833.45	0	0	0	0	0	0	0	0	0	0
MRPL19	0	0	0	0	0	0	0	0	0	2606.55	0	1015.29	0	0	0	0	0	0	0	0	0	0	0	0	0	0	0	1317.86	0	549.745	0	0	0	0	0	0	0	7045.95	4969.55	0	0	0	0	0	0	0	0	0	0
MRPL24	0	0	0	0	0	0	0	0	0	3454.95	0	421.135	0	0	0	0	0	0	0	0	0	0	0	0	0	0	0	0	0	0	0	0	0	0	0	0	0	0	0	0	0	0	0	0	0	0	0	0	0
MRPL4	0	0	0	0	0	0	0	0	0	1300.1	0	790.21	0	0	0	0	0	0	0	0	0	0	0	0	0	0	0	4292.15	0	1188.88	0	0	0	0	0	0	0	7904.7	1984.3	0	0	0	0	0	0	0	0	0	0
MRPL48	0	0	0	0	0	0	0	0	0	2745.35	0	1145.75	0	0	0	0	0	0	0	0	0	0	0	0	0	0	0	1400.45	0	1125.79	0	0	0	0	694.45	365.26	0	6763.8	4933.95	0	0	0	0	0	0	0	0	0	0
MRPS5	0	0	0	0	0	0	0	0	0	1441.15	0	1105.41	0	0	0	0	0	0	0	0	0	0	0	0	0	0	0	0	0	0	0	0	0	0	828.72	441.48	0	3297.9	2382.05	0	0	0	0	0	0	0	0	0	0
MTAP	0	0	0	0	0	0	0	0	0	656.755	0	597.355	0	0	0	0	0	0	0	0	0	0	2169	1265.7	0	0	0	0	0	0	0	0	0	0	0	0	0	0	0	0	0	0	0	0	0	0	0	0	0
MYH10	0	0	0	0	0	0	0	0	0	10992	0	3133.45	0	0	0	0	0	0	0	0	0	0	3647.75	1115.96	0	0	0	0	0	0	0	0	0	0	1342.73	498.705	0	3471.6	1491.05	6307	0	2134.95	6678.9	0	2308.35	0	0	0	0
MYL12A	0	0	0	0	0	0	0	0	0	35813.5	8776.45	17954.5	0	0	0	0	0	0	0	0	0	0	0	0	0	0	0	0	0	0	0	0	0	0	0	0	0	0	0	0	0	0	0	0	0	0	0	0	0
MYLK	0	0	0	0	0	0	0	0	0	1533.9	0	1509.3	0	0	0	0	0	0	0	9778.85	4285.25	0	6469.85	3895.65	0	0	0	0	0	0	0	0	0	0	0	0	0	0	0	0	0	0	0	0	0	0	0	0	0
MYO18A	0	0	0	0	0	0	0	0	0	1453.2	0	2066.05	0	0	0	0	0	0	0	0	0	0	0	0	0	0	0	0	0	0	0	0	0	0	0	0	0	0	0	0	0	0	0	0	0	0	0	0	0
NCAPD2	0	0	0	0	0	0	0	0	0	5250.8	9224.4	3617.2	0	0	0	0	0	0	0	0	0	0	0	0	21182.5	13529	9298.1	21539.5	10281	13783	0	0	0	20153	14566.5	18106	16823	4318.6	25532.5	26629	6290	17176.5	22004	9465.5	10026	0	0	0	0
NDUFB9	0	0	0	0	0	0	0	0	0	3805.4	0	1840.75	0	0	0	0	0	0	0	0	0	0	0	0	0	0	0	4832.75	0	1939.95	0	0	0	0	1764.85	1106.33	0	8192.55	3760.2	0	0	0	0	0	0	0	0	0	0
NDUFS3	0	0	0	0	0	0	0	0	0	3934.65	0	4306.7	0	0	0	0	0	0	0	0	0	0	0	0	0	0	0	4615	550.155	4012.4	0	0	0	0	2888	1585.25	0	6795.75	4986.7	0	0	0	0	0	0	0	0	0	0
NNT	0	0	0	0	0	0	0	0	0	1502.55	0	1715.55	0	0	0	0	0	0	0	0	0	0	0	0	0	0	0	3243.5	0	1401.35	0	0	0	0	932.05	1686.5	0	3649	3431.9	0	0	0	0	0	0	0	0	0	0
NUDT5	0	0	0	0	0	0	0	0	0	1794.75	0	763.205	0	741.765	552.365	436.1	2280.8	770.65	0	4477.25	2781.05	0	9596.55	9085.35	966.32	887.87	677.255	2734	118.36	842.91	0	0	0	0	0	0	0	2640.8	1260.4	1635.9	0	781.62	6846.75	0	2464.35	0	0	0	0
NUP54	0	0	0	0	0	0	0	0	0	80053.5	0	65203.5	0	0	0	0	0	0	0	0	0	0	0	0	0	0	0	1060.3	0	1939.05	0	0	0	0	0	0	0	0	0	0	0	0	0	0	0	0	0	0	0
OCIAD1	0	0	0	0	0	0	0	0	0	3643.65	0	383.35	0	0	0	0	0	0	0	0	0	0	0	0	0	0	0	0	0	0	0	0	0	0	3111.1	587.635	0	6758.8	4295.55	0	0	0	0	0	0	0	0	0	0
OGFR	0	0	0	0	0	0	0	0	0	411360	0	547525	0	0	0	0	0	0	0	0	0	0	0	0	0	0	0	0	0	0	0	0	0	0	232050	145845	0	314505	178322	0	0	0	0	0	0	0	0	0	0
PAWR	0	0	0	0	0	0	0	0	0	2069.6	0	908.76	0	0	0	0	0	0	0	0	0	0	0	0	0	0	0	0	0	0	0	0	0	0	0	0	0	726.08	454.14	0	0	0	0	0	0	0	0	0	0
PCM1	0	0	0	0	0	0	0	0	0	26750	0	37962.5	0	0	0	0	13444.5	2626.45	0	33228	3678	0	28232	28683	0	0	0	1972.8	15872	13518	0	0	0	0	2273.2	11163	0	2254.65	9688.8	39092.5	0	33216.5	27916	0	42560	0	0	0	0
PCMT1	0	0	0	0	0	0	0	0	0	1035.27	0	372.475	0	0	0	0	0	0	0	3894.95	1424.2	0	8199.95	8759.5	0	0	0	0	0	0	0	0	0	0	0	0	0	3511.75	3523.15	0	0	0	4438.85	0	1966.45	862.15	0	609.61	0
PDHX	0	0	0	0	0	0	0	0	0	901.95	0	713.8	0	0	0	0	0	0	0	0	0	0	0	0	0	0	0	43357.5	129.91	17783.5	0	0	0	0	0	0	0	6399.95	3643.8	0	0	0	0	0	0	0	0	0	0
PDXK	0	0	0	0	0	0	0	0	0	2604.5	0	1241.05	0	0	0	0	0	0	0	0	0	0	5080.3	2840.6	0	0	0	0	0	0	0	0	0	0	0	0	0	1323.1	1575.45	0	0	0	3544.35	0	1571.8	0	0	0	0
PEBP1	0	0	0	0	0	0	0	0	0	2589.25	0	1988.4	0	0	0	0	0	0	0	4467.8	3374.25	0	7143.55	9307.9	0	0	0	3431.2	0	2037.2	0	0	0	0	0	0	0	1785.05	554.15	0	0	0	4964.05	0	3142.15	0	0	0	0
PEPD	0	0	0	0	0	0	0	0	0	2150.45	0	2613.6	0	0	0	0	0	0	0	6850.3	3250.7	0	21618.5	16501.5	0	0	0	0	0	0	0	0	0	0	395.075	716.26	0	1213.65	3142.1	7435.95	0	4317.65	14430.5	0	7889.95	0	0	0	0
PGM1	0	0	0	0	0	0	0	0	0	30140.5	0	28596.5	0	0	0	0	0	0	0	0	0	0	14598.5	10216.2	0	0	0	0	0	0	0	0	0	0	0	0	0	0	0	0	0	0	0	0	0	0	0	0	0
PIK3C2A	0	0	0	0	0	0	0	0	0	7541.95	0	882.085	0	0	0	0	0	0	0	0	0	0	0	0	0	0	0	0	0	0	0	0	0	0	0	0	0	719.23	712.37	0	0	0	0	0	0	0	0	0	0
PITPNA	0	0	0	0	0	0	0	0	0	546.435	0	941.255	0	0	0	0	0	0	0	0	0	0	1492.55	1190.45	0	0	0	0	0	0	0	0	0	0	0	0	0	0	0	0	0	0	1513.85	0	1070.16	0	0	0	0
PITPNB	0	0	0	0	0	0	0	0	0	3534.9	0	253.35	0	0	0	0	0	0	0	434.215	1224.45	0	4142.55	1378.45	0	0	0	0	0	0	0	0	0	0	338.688	287.23	0	2333.2	1119.05	785.555	0	556.115	4734.25	0	1090.31	0	0	0	0
PLS1	0	0	0	0	0	0	0	0	0	7369.6	0	1260.4	0	0	0	0	0	0	0	0	0	0	670.605	2250.35	0	0	0	0	0	0	0	0	0	0	0	0	0	0	0	0	0	0	0	0	0	0	0	0	0
PPL	0	0	0	0	0	0	0	0	0	13404.3	0	9996.3	0	0	0	0	0	0	0	0	0	0	1622.75	1111.24	0	0	0	0	0	0	0	0	0	0	891.49	380.47	0	4140.45	2522.65	6435.45	0	1558.3	4934.75	0	1201.55	0	0	0	0
PPP1R2	0	0	0	0	0	0	0	0	0	3231.5	0	1644.05	0	0	0	0	0	0	0	0	0	0	3393.9	2087.55	0	0	0	0	0	0	0	0	0	0	0	0	0	1965.45	741.91	0	0	0	1490.35	0	553.33	0	0	0	0
PPP2R5C	0	0	0	0	0	0	0	0	0	12114	0	4341.05	0	0	0	0	0	0	0	0	0	0	3076.65	1532.85	0	0	0	0	0	0	0	0	0	0	0	0	0	0	0	0	0	0	0	0	0	0	0	0	0
PPP2R5E	0	0	0	0	0	0	0	0	0	3201.35	0	2600.1	0	0	0	0	0	0	0	0	0	0	1141.8	2882.3	0	0	0	0	0	0	0	0	0	0	0	0	0	1929.2	1277.75	0	0	0	0	0	0	0	0	0	0
PPP6R3	0	0	0	0	0	0	0	0	0	1207.35	0	581.34	0	0	0	0	0	0	0	1022.48	495.2	0	4522.15	2338.3	0	0	0	0	0	0	0	0	0	0	0	0	0	1825.85	678.58	1207.5	0	615.545	3246.3	0	849.02	0	0	0	0
PPT1	0	0	0	0	0	0	0	0	0	7002.8	0	4494.7	0	0	0	0	0	0	0	0	0	0	5336.4	2938.5	0	0	0	0	0	0	0	0	0	0	0	0	0	1506.95	1375.75	2378.65	0	1155.35	6265.65	0	4589.05	0	0	0	0
PRKAG1	0	0	0	0	0	0	0	0	0	1645.4	0	475.51	0	0	0	0	0	0	0	0	0	0	3951.3	1177.45	0	0	0	0	0	0	0	0	0	0	0	0	0	1406.6	1251.74	0	0	0	0	0	0	0	0	0	0
PRSS8	0	0	0	0	0	0	0	0	0	2092.5	0	1983.4	0	0	0	0	0	0	0	1430.75	1467.4	0	0	0	0	0	0	0	0	0	0	0	0	0	0	0	0	4191	2612.55	0	0	0	0	0	0	0	0	0	0
PSMB1	0	0	0	0	0	0	0	0	0	122085	44606.5	143355	0	0	0	0	0	0	235810	72630	79885	0	0	0	0	0	0	0	0	0	0	0	0	0	0	0	0	0	0	0	0	0	139680	53518.5	113005	0	0	0	0
PSMF1	0	0	0	0	0	0	0	0	0	2627.9	0	437.025	0	0	0	0	0	0	0	0	0	0	2586.9	752.42	0	0	0	0	0	0	0	0	0	0	0	0	0	1276.2	444.67	0	0	0	0	0	0	0	0	0	0
PTPN12	0	0	0	0	0	0	0	0	0	1494.25	0	958.68	0	0	0	0	0	0	0	0	0	0	0	0	0	0	0	0	0	0	0	0	0	0	0	0	0	0	0	0	0	0	0	0	0	0	0	0	0
PYGL	0	0	0	0	0	0	0	0	0	2439.15	0	1002.83	0	0	0	0	0	0	0	1512.95	1096.58	0	6490.5	3665.7	1816.55	1493.75	1199.15	2683.15	0	1573.9	0	0	0	0	0	0	0	2395.35	1079.11	1902.6	0	894.975	5130.3	0	2086.5	0	0	0	0
RAB18	0	0	0	0	0	0	0	0	0	732.36	0	531.07	0	0	0	0	0	0	0	0	0	0	963.39	825.66	0	0	0	5844.15	0	1604.88	0	0	0	0	1114.3	846.59	0	2586.6	2733.55	0	0	0	2677.65	0	1061.1	0	0	0	0
RIPOR3	0	0	0	0	0	0	0	0	0	18902.5	0	12874	0	0	0	0	0	0	0	0	0	0	12997.5	8374.1	0	0	0	0	0	0	0	0	0	0	0	0	0	621.685	4987.4	31076	0	2349.75	30991.5	0	15438	0	0	0	0
ROCK2	0	0	0	0	0	0	0	0	0	1351.14	0	1871.62	0	0	0	0	0	0	0	0	0	0	0	0	0	0	0	0	0	0	0	0	0	0	0	0	0	0	0	0	0	0	0	0	0	0	0	0	0
RRAS2	0	0	0	0	0	0	0	0	0	1277.45	0	435.535	0	0	0	0	0	0	0	0	0	0	2200.7	552.32	0	0	0	0	0	0	0	0	0	0	0	0	0	4916.9	1053.55	0	0	0	0	0	0	0	0	0	0
SCML2	0	0	0	0	0	0	0	0	0	1769.69	0	2729.45	0	0	0	0	0	0	0	0	0	0	2344.8	2294.3	0	0	0	32097.5	0	7402.65	0	0	0	0	0	0	0	2319.25	1806.8	0	0	0	2779.6	0	1524.2	0	0	0	0
SEC23IP	0	0	0	0	0	0	0	0	0	1533.1	0	854.17	0	0	0	0	0	0	0	0	0	0	4408.9	1879.05	0	0	0	0	0	0	0	0	0	0	0	0	0	2062.4	1197.2	0	0	0	1852.3	0	716.425	0	0	0	0
SEC24A	0	0	0	0	0	0	0	0	0	8993.25	6790.1	3803.05	0	0	0	0	0	0	0	19050	9478.25	0	41879	28013	0	0	0	0	0	0	0	0	0	0	11025	12892.1	0	3700.1	7555.1	0	0	0	17354	0	10737	0	0	0	0
SLC25A4	0	0	0	0	0	0	0	0	0	3101	0	1249.05	0	0	0	0	0	0	0	0	0	0	0	0	0	0	0	15582	0	5707.65	0	0	0	0	509.725	461.255	0	3695.85	2471.2	1304.3	0	197.675	0	0	0	0	0	0	0
SMARCE1	0	0	0	0	0	0	0	0	0	238280	0	252985	0	0	0	0	0	0	0	0	0	0	0	0	0	0	0	0	0	0	0	0	0	0	0	0	0	257060	181430	0	0	0	0	0	0	0	0	0	0
SNAP23	0	0	0	0	0	0	0	0	0	3789.3	0	1114.51	0	0	0	0	0	0	0	2750.3	1139.21	0	4411.95	3181.25	0	0	0	875.605	0	690.06	0	0	0	0	551.825	500.335	0	4662.75	3787.95	2238.7	0	1012.35	987.315	0	470.8	0	0	0	0
SNTB2	0	0	0	0	0	0	0	0	0	24360	0	29460.5	0	0	0	0	0	0	0	0	0	0	0	0	0	0	0	8211.8	8204.45	10685	0	0	0	0	0	0	0	2470.4	2493.75	22332.9	0	15317.5	0	0	0	0	0	0	0
SNX9	0	0	0	0	0	0	0	0	0	3890.95	0	499.495	0	0	0	0	0	0	0	0	0	0	0	0	0	0	0	0	0	0	0	0	0	0	0	0	0	2645.05	808.42	0	0	0	0	0	0	0	0	0	0
SORBS1	0	0	0	0	0	0	0	0	0	1632.55	0	7801.45	0	0	0	0	0	0	0	21166.5	14582.5	0	13448	13084	0	0	0	587.675	29.478	79.475	0	0	0	0	0	0	0	247.92	175.51	1787.2	0	239.245	3760.85	0	1455.7	0	0	0	0
SPR	0	0	0	0	0	0	0	0	0	1337.85	0	709.255	0	0	0	0	0	0	0	0	0	0	1332.65	6733.5	0	0	0	0	0	0	0	0	0	0	0	0	0	1124.05	691.86	517.99	0	3019.2	5279	0	3659.3	0	0	0	0
SPTAN1	0	0	0	0	0	0	0	0	0	16067	0	6705.45	0	0	0	0	0	0	0	2854.5	4579.95	0	2107.25	7359.3	0	0	0	0	0	0	0	0	0	0	0	0	0	4718.3	1639.25	0	0	0	0	0	0	0	0	0	0
SSR3	0	0	0	0	0	0	0	0	0	1520	0	1733.75	0	0	0	0	0	0	0	0	0	0	0	0	7040.05	2679.7	0	7853.55	0	3489.45	0	0	0	0	847.59	2328.6	0	0	0	0	0	0	0	0	0	0	0	0	0
STMN1	0	0	0	0	0	0	0	0	0	985.095	0	1745.1	0	0	0	0	0	0	0	1837.3	1789.55	0	10287.5	4740.4	0	0	0	0	0	0	0	0	0	0	0	0	0	4096.35	1710.1	0	0	0	0	0	0	0	0	0	0
SYNPO	0	0	0	0	0	0	0	0	0	6006.65	0	2105.99	0	0	0	0	0	0	0	0	0	0	0	0	0	0	0	0	0	0	0	0	0	0	0	0	0	0	0	0	0	0	0	0	0	0	0	0	0
TFG	0	0	0	0	0	0	0	0	0	3650.35	0	3209.4	3213.5	3548.55	3628.8	3668.1	3885.25	1755.05	0	4290.8	4500.3	0	7310.05	6394.25	2478.1	3731.85	4363.45	0	0	0	0	0	0	0	0	0	1334.6	4643.2	3343.4	0	0	0	2247.65	0	4090.15	3900.05	2872.65	3789.8	3899.25
TMEM70	0	0	0	0	0	0	0	0	0	779.77	0	2695.2	0	0	0	0	0	0	0	0	0	0	0	0	0	0	0	6361.05	0	1940.9	0	0	0	0	0	0	0	1613.85	3868.25	0	0	0	0	0	0	0	0	0	0
TNKS1BP1	0	0	0	0	0	0	0	0	0	13456	0	7384.15	0	0	0	0	0	0	0	1473.5	1243.1	0	818.785	1354.5	0	0	0	0	0	0	0	0	0	0	0	0	0	552.45	498.97	1771.15	0	1114.25	3382.95	0	1455.81	0	0	0	0
TNPO3	0	0	0	0	0	0	0	0	0	1493.1	0	587.855	0	0	0	0	0	0	0	0	0	0	1257.65	646.8	0	0	0	0	0	0	0	0	0	0	1034.24	676.265	0	1019.5	1059.45	0	0	0	996.095	0	430.945	0	0	0	0
TOMM40	0	0	0	0	0	0	0	0	0	783.425	0	429.955	0	0	0	0	0	0	0	0	0	0	0	0	0	0	0	19322.5	0	4724.5	0	0	0	0	1733.8	3224.25	0	3668.5	2888.85	0	0	0	537.115	0	375.215	0	0	0	0
TWF2	0	0	0	0	0	0	0	0	0	8244.3	0	2048.6	0	326.96	245.36	163.045	304.45	178.205	0	2876.55	623.69	0	4961.75	2469.85	0	0	0	0	0	0	0	0	0	0	0	0	0	2083.8	652.545	1012.19	0	464.22	3637.35	0	677.07	0	0	0	0
TXNDC17	0	0	0	0	0	0	0	0	0	2573.35	0	1300.75	0	0	0	0	0	0	0	3091.8	1683.3	0	4551.3	5169.9	0	0	0	0	0	0	0	0	0	0	0	0	0	1931	1239.15	0	0	0	2103.75	0	4431.75	0	0	0	0
UBXN1	0	0	0	0	0	0	0	0	0	764.83	670.89	957.3	0	0	0	0	0	0	0	0	0	0	10851.5	2926.25	0	0	0	0	0	0	0	0	0	0	2977.85	654.93	0	4866.6	3963.4	0	0	0	0	0	0	0	0	0	0
UCHL3	0	0	0	0	0	0	0	0	0	707.35	0	921.07	0	0	0	0	0	0	0	3994.05	2497.4	0	18038	8970.35	0	0	0	0	0	0	0	0	0	0	379.9	42.2185	0	1891.85	3144.85	0	0	0	5316.55	0	3978.85	0	0	0	0
UFC1	0	0	0	0	0	0	0	0	0	1949.4	0	1401.1	0	0	0	0	0	0	0	0	0	0	2922.2	1197.2	0	0	0	0	0	0	0	0	0	0	754.33	658.33	0	1721.25	1437.8	0	0	0	0	0	0	0	0	0	0
VASP	0	0	0	0	0	0	0	0	0	57774	5762.8	65895	0	0	0	0	0	0	8803.3	19868	17249	0	0	0	0	0	0	0	0	0	0	0	0	0	0	0	0	0	0	0	0	0	41619.5	2804.2	24028.5	0	0	0	0
XPO7	0	0	0	0	0	0	0	0	0	611.72	0	731.47	0	0	0	0	0	0	0	0	0	0	3197.3	886.335	0	0	0	13155	0	5828.45	0	0	0	0	1604.5	994.67	0	2460.8	2302.95	1913.5	0	1355.89	2073.65	0	2279.4	0	0	0	0
YES1	0	0	0	0	0	0	0	0	0	3737.3	0	4112.85	0	0	0	0	0	0	0	4087.35	2587.55	0	5077.7	5154.95	0	0	0	0	0	0	0	0	0	0	1244.35	3733.35	0	4281.75	2580.95	2047.35	0	5950.1	2400.5	0	2237	0	0	0	0
YKT6	0	0	0	0	0	0	0	0	0	1457.2	0	388.555	0	0	0	0	0	0	0	0	0	0	3068.85	705.55	0	0	0	0	0	0	0	0	0	0	0	0	0	978.68	602.375	0	0	0	0	0	0	0	0	0	0
ZC3HAV1L	0	0	0	0	0	0	0	0	0	774.22	0	856.75	0	0	0	0	0	0	0	0	0	0	0	0	0	0	0	0	0	0	0	0	0	0	0	0	0	0	0	0	0	0	0	0	0	0	0	0	0
ZYX	0	0	0	0	0	0	0	0	0	3858.15	0	5875.05	0	0	0	0	0	0	0	5910.25	4354.3	0	2890.55	1725.7	0	0	0	2184.1	0	1274.65	0	0	0	0	0	0	0	0	0	0	0	0	6450.9	0	3702.15	0	0	0	0
AP1S3	0	0	0	0	0	0	0	0	0	0	0	0	2164.6	836.705	1883.4	2632.6	1472.5	1881.15	0	0	0	0	0	0	0	0	0	0	0	0	0	0	0	0	0	0	0	0	0	0	0	0	0	0	0	1341.2	3764.7	3765.9	2695.1
AP2B1	0	0	0	0	0	0	0	0	0	0	0	0	24652.5	31630.5	26685	0	0	0	0	0	0	0	0	0	0	0	0	19640	30937.5	25989.5	0	0	0	0	0	0	0	0	0	0	0	0	0	0	0	29265.5	23212	24167.5	28692.5
ATP5IF1	0	0	0	0	0	0	0	0	0	0	0	0	1360.65	849.205	1156.35	0	0	0	0	3048.95	2853.75	0	691.845	2913.65	0	0	0	0	0	0	0	0	0	0	0	0	0	0	0	0	0	0	0	0	0	0	0	0	0
BIRC2	0	0	0	0	0	0	0	0	0	0	0	0	1405.9	1633	1577	1234.9	1109.5	1354.55	0	0	0	0	0	0	0	0	0	0	0	0	0	0	0	0	0	0	0	0	0	0	0	0	0	0	0	0	0	0	0
C15orf40	0	0	0	0	0	0	0	0	0	0	0	0	2188.6	699.64	1441.9	0	0	0	0	0	0	0	0	0	826.13	1309	1278.7	14277.5	1134.67	6652.05	0	9828.5	6965	0	0	0	0	0	0	0	0	0	0	0	0	0	7831.2	1969.85	0
CALU	0	0	0	0	0	0	0	0	0	0	0	0	2415.7	5061.6	4687.65	1613.6	3873.35	2961.6	0	1398.7	865.84	0	5444	3658.6	0	946.06	2435.95	0	5883.35	2530.15	0	0	0	0	0	0	0	3234.9	3773.4	0	0	0	0	0	0	750.3	5024.95	2951.05	1250.05
CC2D1A	0	0	0	0	0	0	0	0	0	0	0	0	599.31	995.14	755.955	0	0	0	0	0	0	0	0	0	835.405	646.125	432.77	0	0	0	0	0	0	0	0	0	0	0	0	0	0	0	0	0	0	0	0	0	0
CCAR1	0	0	0	0	0	0	0	0	0	0	0	0	72504.5	45283.5	50690	0	0	0	0	0	0	0	0	0	0	0	0	0	0	0	0	0	0	0	0	0	0	0	0	0	0	0	0	0	0	43874	71782	58864	43832
CCDC88C	0	0	0	0	0	0	0	0	0	0	0	0	9147.8	13878.9	5305.45	0	0	0	0	0	0	0	2717.15	12899.4	0	0	0	0	0	0	0	0	0	0	0	0	0	0	0	0	0	0	0	0	0	0	5073.45	4726.55	0
CHMP2B	0	0	0	0	0	0	0	0	0	0	0	0	580.55	708.785	874.32	0	0	0	0	0	0	0	0	0	0	0	0	2235.4	0	1087.35	0	0	0	0	0	0	0	0	0	0	0	0	0	0	0	0	0	0	0
CLNS1A	0	0	0	0	0	0	0	0	0	0	0	0	746755	307465	354285	0	0	0	0	0	0	0	0	0	0	0	0	0	0	0	351685	630130	496095	0	0	0	0	0	0	0	0	0	0	0	0	0	0	0	292940
COPRS	0	0	0	0	0	0	0	0	0	0	0	0	10220	2910.1	3096.4	4064	659.8	3566	0	0	0	0	0	0	578.97	1019.7	1193.9	0	1596.4	700.025	0	8223.7	5387.5	0	0	0	0	0	0	0	0	0	0	0	0	472.73	5235.4	2454.75	744.89
DIMT1	0	0	0	0	0	0	0	0	0	0	0	0	1449.75	1280	1448.24	2061.3	0	789.24	0	0	0	0	0	0	1997.25	1336.45	730.145	1128.01	927.825	361.21	0	4500	1821.6	0	0	0	1249.8	1857.4	0	0	0	0	0	0	0	537.52	1755.9	1181.58	0
EEF1D	0	0	0	0	0	0	0	0	0	0	0	0	5775.95	1299.7	1610.1	4925.85	3469.25	4185.75	0	0	0	0	0	0	0	0	0	0	0	0	0	0	0	0	0	0	0	1692.45	1472.9	0	0	0	0	0	0	0	5325	2931.25	0
EFTUD2	0	0	0	0	0	0	0	0	0	0	0	0	21512	11144	14424	0	0	0	0	0	0	0	0	0	0	0	0	0	0	0	0	0	0	0	0	0	0	0	0	0	0	0	0	0	0	9574.8	23691.5	18628	0
EIF3A	0	0	0	0	0	0	0	0	0	0	0	0	128160	66456.5	90199	132080	65831	101795	0	0	0	0	0	0	0	0	0	0	0	0	111990	140190	152355	0	0	0	0	0	0	0	0	0	0	0	0	56006.5	119005	97821.5	62406.5
EIF3E	0	0	0	0	0	0	0	0	0	0	0	0	178670	138225	146995	173225	157470	169270	0	0	0	0	0	0	68909	129725	167680	0	0	0	152405	192300	216210	0	0	0	0	0	0	0	0	0	0	0	0	116440	158430	137490	126260
EIF4E2	0	0	0	0	0	0	0	0	0	0	0	0	2573.05	1382.2	1378	0	0	0	0	0	0	0	0	0	0	0	0	0	0	0	0	0	0	0	0	0	0	0	0	0	0	0	0	0	0	0	0	0	0
EXOSC3	0	0	0	0	0	0	0	0	0	0	0	0	1249.89	2277.75	2812.65	2931.7	2353.2	2667.95	0	824.925	963.995	0	0	0	3212.6	3520.5	3499.7	2745	1484.7	3328.6	0	0	0	0	0	0	0	0	0	0	0	0	0	0	0	1321.8	2758.3	0	693.93
FOXA1	0	0	0	0	0	0	0	0	0	0	0	0	4194.55	2806.4	5118.9	0	0	0	0	0	0	0	0	0	0	0	0	4831.05	1678.35	1683.5	0	0	0	0	0	0	0	0	0	0	0	0	0	0	0	0	0	0	0
GAR1	0	0	0	0	0	0	0	0	0	0	0	0	1369.9	540.68	1237.4	0	0	0	0	0	0	0	0	0	2710.5	2301.8	1215.1	6020.15	882.37	2132.75	0	0	0	0	0	0	0	0	0	0	0	0	0	0	0	0	0	0	0
HNRNPLL	0	0	0	0	0	0	0	0	0	0	0	0	1819.35	2137.55	1537.3	1132.2	1030.04	1896.13	0	0	0	0	0	0	0	0	0	0	0	0	0	0	0	0	0	0	0	0	0	0	0	0	0	0	0	0	0	0	0
IARS1	0	0	0	0	0	0	0	0	0	0	0	0	4374.95	1385.9	2013.45	2575.95	1606.45	2142.4	0	0	0	0	0	0	0	0	0	0	0	0	0	0	0	0	0	0	0	0	0	0	0	0	0	0	0	1336.4	1566.7	1788.4	0
IMP3	0	0	0	0	0	0	0	0	0	0	0	0	1924.9	1252.1	1575.4	3019.9	0	1034.3	0	0	0	0	0	0	427.61	472.49	955.795	1262.75	1062.3	1378.25	0	0	0	0	0	0	0	0	0	0	0	0	0	0	0	537.71	3101.1	1613.5	0
KATNA1	0	0	0	0	0	0	0	0	0	0	0	0	1527.4	1464.95	1261.1	2685.6	1654.75	2442.95	0	0	0	0	0	0	0	0	0	0	1883.55	951.14	0	0	0	0	0	0	0	0	0	0	0	0	0	0	0	707.44	2493.25	1390.3	0
LRP2	0	0	0	0	0	0	0	0	0	0	0	0	1692.5	5431.25	6772.25	3443.05	3783.35	4074.85	5560.6	0	2149.75	0	0	0	0	4370.5	5789.9	8973.15	3490.1	3150.5	0	0	0	0	0	0	0	0	0	0	0	0	0	0	0	3547.95	6515.6	2425.9	4221.9
LRRFIP2	0	0	0	0	0	0	0	0	0	0	0	0	1377.6	907.425	2208.7	1002.84	1093.35	1062.86	0	0	0	0	0	0	0	0	0	720.29	1352.2	1131.7	0	0	0	0	787.015	794.09	0	0	0	0	0	0	0	0	0	1059.17	1614.25	1445.05	885.135
LRRK1	0	0	0	0	0	0	0	0	0	0	0	0	1661.65	433.03	971.8	0	0	0	0	0	0	0	0	0	3463	2693.1	861.27	0	0	0	0	0	0	0	0	0	0	0	0	0	0	0	0	0	0	0	0	0	0
MOB2	0	0	0	0	0	0	0	0	0	0	0	0	4521.85	1495.55	2223	4491.35	0	3492.75	0	0	0	0	0	0	0	0	0	0	0	0	0	5651.55	3469.3	0	0	0	0	0	0	0	0	0	0	0	0	1625.8	7802.2	3872.1	1722.1
MRPL12	0	0	0	0	0	0	0	0	0	0	0	0	2719.35	1396.13	2260.9	521.3	703.015	812.05	0	0	0	0	0	0	1437.85	2182.7	2162.9	17755	1235.21	9022.8	0	6383.8	2331.25	0	0	0	0	11271.5	5417	0	0	0	0	0	0	343.13	9779.4	6241.7	462.03
MRPS18B	0	0	0	0	0	0	0	0	0	0	0	0	3115.3	715.065	1441.1	2830.2	0	1412	0	0	0	0	0	0	0	0	0	2107	718.36	1383.45	0	0	0	0	0	0	0	0	0	0	0	0	0	0	0	0	0	0	0
MRPS22	0	0	0	0	0	0	0	0	0	0	0	0	3865.15	909.81	1719	0	0	0	0	0	0	0	0	0	0	0	0	6081	784.03	1765.75	0	0	0	0	0	0	0	2233.4	6892.45	0	0	0	0	0	0	0	8253.9	3714.7	0
MSN	0	0	0	0	0	0	0	0	0	0	0	0	2407.05	4613	4245.4	0	0	0	0	6518.85	1829.48	0	0	0	1286.9	1424.25	1275.2	2412.7	3383.65	3020.8	0	0	0	0	0	0	0	0	0	0	0	0	1315.3	0	2427.85	0	0	0	4922.5
NDE1	0	0	0	0	0	0	0	0	0	0	0	0	851.46	3614.8	2205.95	490.06	2521.5	1526.4	0	1908.65	793.465	0	1717.65	1770.27	0	1700.33	4016.6	0	3859.85	1417.85	0	0	0	0	0	0	0	0	0	0	0	0	0	0	0	1388.5	1798.1	2300.3	1539.1
NSF	0	0	0	0	0	0	0	0	0	0	0	0	3042.35	692.995	3023.9	6813.65	1616.66	5767.75	0	0	0	0	0	0	973.47	1492.2	2677.6	3987.2	0	2493.8	0	8562.75	14205.5	0	0	0	0	0	0	0	0	0	0	0	0	0	0	0	0
NSRP1	0	0	0	0	0	0	0	0	0	0	0	0	4044.4	2722.95	2243.75	0	0	0	0	0	0	0	0	0	0	0	0	0	2786.4	1697.1	0	0	0	0	0	0	0	0	0	0	0	0	0	0	0	0	2803.85	2663.55	0
PDLIM7	0	0	0	0	0	0	0	0	0	0	0	0	2881.1	3145.7	3146.9	0	0	0	0	0	0	0	0	0	3890.4	3366.85	2665.15	2348.75	3663.3	3924.35	0	0	0	0	0	0	0	0	0	0	0	0	0	0	0	3336.4	1543.6	2393.85	1739.2
PFKFB3	0	0	0	0	0	0	0	0	0	0	0	0	2704.45	623.27	481.745	1965.15	0	732.595	0	0	0	0	0	0	0	0	0	0	0	0	0	2088.6	1188.8	0	0	0	0	0	0	0	0	0	0	0	0	0	10838.5	4864.1	0
PSMD2	0	0	0	0	0	0	0	0	0	0	0	0	24990.5	28128.5	27811	27832.5	41522	33526.5	0	0	0	0	0	0	0	0	0	0	0	0	0	0	0	0	0	0	0	0	0	0	0	0	0	0	0	0	0	0	25219.5
QKI	0	0	0	0	0	0	0	0	0	0	0	0	5341.1	2974.45	3689.4	4854.45	3482.05	3833.95	0	0	0	0	0	0	0	1268.3	2328.95	76.068	2093.85	806.175	0	5239.45	6312.65	0	0	0	0	0	0	0	0	0	0	0	0	1145.1	9596.75	3424.5	2130
RAB3A	0	0	0	0	0	0	0	0	0	0	0	0	5003.3	0	4516.1	0	0	0	0	0	0	0	0	0	0	0	0	0	0	0	0	0	0	0	0	0	0	0	0	0	0	0	0	0	0	0	0	0	0
RPS12	0	0	0	0	0	0	0	0	0	0	0	0	241430	157820	131330	0	0	0	0	0	0	0	0	0	154955	159195	152930	0	0	0	167675	266920	157365	0	0	0	0	0	0	0	0	0	0	0	0	0	0	0	130630
SNF8	0	0	0	0	0	0	0	0	0	0	0	0	621.24	1087.73	903.155	950.785	749.23	1022.26	0	0	0	0	0	0	1268.6	1020.6	963.62	2438	986.48	1537.65	0	0	0	0	1341.5	1095.71	0	0	0	0	0	0	0	0	0	1008.4	2127.75	978.41	0
SNRPA1	0	0	0	0	0	0	0	0	0	0	0	0	101820	46101.5	67757	0	0	0	0	0	0	0	0	0	64565.5	64445	61822.5	0	0	0	75316.5	90674.5	96106	0	0	0	0	0	0	0	0	0	0	0	0	59283.5	73820.5	67343.5	51881.5
SNRPF	0	0	0	0	0	0	0	0	0	0	0	0	102320	62586.5	65272.5	65642.5	58051.5	65826	90022.5	42684	50770	0	0	0	55928.5	69191.5	71977.5	0	0	0	86666.5	72816.5	70639	0	0	0	0	0	0	0	0	0	0	0	0	70726	73251	81071	66604
SRSF9	0	0	0	0	0	0	0	0	0	0	0	0	2007.6	1292.77	679.135	1953.2	0	1144.98	0	0	0	0	0	0	1305.7	1566.57	1356.9	5793.9	1625.07	4062.6	0	0	0	0	0	0	0	0	0	0	0	0	0	0	0	3383.4	2394.15	3181.2	0
SYNRG	0	0	0	0	0	0	0	0	0	0	0	0	1416.35	2710.3	1955.65	1798.95	871.28	1444.6	0	0	0	0	0	0	0	0	0	0	0	0	0	0	0	0	0	0	0	0	0	0	0	0	0	0	0	1346.9	1755.65	1526.8	1387.35
TRIP4	0	0	0	0	0	0	0	0	0	0	0	0	3574.25	2803.2	5875.95	3693.9	3308.1	3817.5	0	0	0	0	0	0	0	2667.05	4282.35	2085.5	4307.05	3302.15	0	0	0	0	0	0	0	0	0	0	0	0	0	0	0	2812.2	5475	5472.2	0
UCHL5	0	0	0	0	0	0	0	0	0	0	0	0	3058.7	3262.1	3297	3013.9	3929.05	3717.4	0	0	0	0	2325.85	3845.9	3567.2	2779.75	3759.65	0	0	0	0	0	0	0	0	0	0	0	0	0	0	0	0	0	0	2294.55	3789.3	3303.4	1882.05
WTAP	0	0	0	0	0	0	0	0	0	0	0	0	21287.5	11191.5	13572	13672.5	17687	14010.5	0	0	0	0	0	0	15846	17357	18724	0	0	0	0	0	0	0	0	0	0	0	0	0	0	0	0	0	0	9267.25	24439.5	16916	8096.85
CSDE1	0	0	0	0	0	0	0	0	0	0	0	0	0	3088.35	889.41	0	0	0	0	2824.5	1847.5	0	1184.95	3770.75	0	854.495	1582.95	564.875	1728.6	1198.4	0	0	0	0	0	0	0	0	0	0	0	0	0	0	0	0	0	0	0
EHD4	0	0	0	0	0	0	0	0	0	0	0	0	0	874.42	1197.6	0	0	0	0	0	0	0	0	0	543.635	1379.1	2264.2	0	0	0	0	0	0	0	0	0	0	0	0	0	0	0	0	0	0	0	0	0	0
HDAC2	0	0	0	0	0	0	0	0	0	0	0	0	0	1513.57	882.61	0	3014.5	947.015	0	0	0	0	0	0	0	938.095	2661.05	935.15	893.99	315.815	0	0	0	0	0	0	0	0	0	0	0	0	0	0	0	0	0	0	0
MRPS9	0	0	0	0	0	0	0	0	0	0	0	0	0	552.235	597.69	0	0	0	0	0	0	0	0	0	0	0	0	0	0	0	0	0	0	0	1802.3	521.8	1102.7	4761.4	7776.9	0	0	0	0	0	0	0	0	0	0
MVK	0	0	0	0	0	0	0	0	0	0	0	0	0	3700.45	3197.15	2071.8	3013.25	2545.6	0	3327.65	2201.55	0	5736.25	3901.2	0	2361.2	3860.85	0	3325.95	2200.75	0	0	0	0	0	0	0	0	0	1855.3	0	1751.3	2409.85	0	2071.65	3894.25	1835.8	3281	3440.25
MYL9	0	0	0	0	0	0	0	0	0	0	0	0	0	1136.95	1250.95	0	0	0	0	936.625	1272.15	0	0	0	0	0	0	1618.05	682.63	1275.6	0	0	0	0	0	0	0	0	0	0	0	0	1886.55	0	1594.15	0	2203.65	1251.1	0
NMD3	0	0	0	0	0	0	0	0	0	0	0	0	0	2033.75	2078.4	0	0	0	0	0	0	0	0	0	0	0	0	0	0	0	0	0	0	0	0	0	0	0	0	0	0	0	0	0	0	0	0	0	0
PSAT1	0	0	0	0	0	0	0	0	0	0	0	0	0	1088.54	440.745	0	0	0	0	0	0	0	1349.09	2662.85	0	0	0	0	1107.3	824.795	0	0	0	0	0	0	0	0	0	2414.8	0	974.7	1476.4	0	1705.1	0	0	0	0
PSMD10	0	0	0	0	0	0	0	0	0	0	0	0	0	1441.8	1825.9	1159.7	1634.95	1286.35	0	0	0	0	1181.85	1127.3	0	804.8	1261.25	0	1396.5	936.04	0	0	0	0	0	0	0	630.185	631.2	0	0	0	0	0	0	0	0	0	0
PSMG1	0	0	0	0	0	0	0	0	0	0	0	0	0	1003.59	808.36	723.02	1769.95	545.38	0	6291.6	3690.1	0	3119.4	3654.4	0	0	0	574.36	1537.7	1138.3	0	0	0	0	0	0	0	0	0	0	0	0	1602.95	0	4921.75	0	0	0	0
RRM2	0	0	0	0	0	0	0	0	0	0	0	0	0	1928.2	1045.25	0	0	0	0	0	0	0	7306.35	6270.1	0	0	0	0	0	0	0	0	0	0	0	0	0	0	0	2823.25	0	5299.55	3603.4	0	8355.4	1876.85	759.76	756.85	0
SMAP1	0	0	0	0	0	0	0	0	0	0	0	0	0	1890.85	1536.95	0	0	0	0	3319.2	2241	0	0	0	2108.8	1672.5	2419.5	6449.65	2219.7	4379.25	0	0	0	0	0	0	0	0	0	0	0	0	3154.95	0	2991.95	0	0	0	0
SMYD2	0	0	0	0	0	0	0	0	0	0	0	0	0	9030.7	5265.85	3415.4	6741.05	2206.75	0	0	0	0	0	0	926.81	4959	8308.6	5354.1	6842.25	4371.65	0	0	0	0	0	0	0	0	0	1172.45	2485.6	351.38	0	0	0	4895.1	1502.5	1837.4	4481.25
TAB2	0	0	0	0	0	0	0	0	0	0	0	0	0	774.96	532.67	485.48	2474.75	696.04	0	0	0	0	0	0	0	477.75	2490.1	0	3206.65	961.395	0	0	0	0	0	0	0	0	0	0	0	0	0	0	0	0	0	0	0
VTA1	0	0	0	0	0	0	0	0	0	0	0	0	0	1793.15	3020.8	0	0	0	0	0	0	0	2521.75	1100	0	0	0	0	0	0	0	0	0	0	0	0	0	0	0	1048.72	0	754.985	0	0	0	0	0	0	0
ATP6V1A	0	0	0	0	0	0	0	0	0	0	0	0	0	0	0	14806.5	33030	22885.5	0	0	0	0	0	0	0	0	0	0	0	0	0	0	0	0	0	0	0	0	0	0	0	0	0	0	0	0	0	0	0
BANF1	0	0	0	0	0	0	0	0	0	0	0	0	0	0	0	2607.95	639.22	0	0	913.375	494.14	0	3008.6	2386.2	0	0	0	199.21	2750.55	1460.09	0	0	0	0	2402.6	3439.1	0	2284.35	3106.8	0	0	0	0	0	0	1243.55	2756.8	1421.2	0
CBX5	0	0	0	0	0	0	0	0	0	0	0	0	0	0	0	380.31	0	285.82	0	0	0	0	0	0	0	0	0	0	0	0	0	0	0	0	0	0	0	0	0	0	0	0	0	0	0	0	0	0	0
CDC23	0	0	0	0	0	0	0	0	0	0	0	0	0	0	0	633.47	2671.55	1116.05	0	0	0	0	0	0	0	1263.2	3799.9	2803.7	636.3	982.245	0	0	0	0	0	0	0	0	0	0	0	0	0	0	0	0	0	0	0
CDK9	0	0	0	0	0	0	0	0	0	0	0	0	0	0	0	1012.85	0	804.21	0	0	0	0	0	0	0	0	0	0	0	0	0	0	0	0	0	0	0	0	0	0	0	0	0	0	0	677.83	1717.45	1186.44	0
CHCHD2P9	0	0	0	0	0	0	0	0	0	0	0	0	0	0	0	1611.4	374	814.17	0	0	0	0	0	0	0	0	0	0	0	0	0	0	0	0	0	0	0	0	0	0	0	0	0	0	0	0	3380.45	1494.26	0
CORO1C	0	0	0	0	0	0	0	0	0	0	0	0	0	0	0	66990	94166.5	75596	0	0	0	0	0	0	0	0	0	0	0	0	0	0	0	0	0	0	0	0	0	0	0	0	0	0	0	74102.5	65489.5	61372.5	69825
CRACD	0	0	0	0	0	0	0	0	0	0	0	0	0	0	0	558.095	679.525	1186.37	0	0	0	0	0	0	0	0	0	0	0	0	0	3277	887.035	0	0	0	0	0	0	0	0	0	0	0	0	0	0	0	0
DAD1	0	0	0	0	0	0	0	0	0	0	0	0	0	0	0	3455.5	1149.1	2663.2	0	0	0	0	0	0	0	0	0	15076.5	0	10261.1	0	0	0	0	0	0	0	0	0	0	0	0	0	0	0	0	0	0	0
DHX30	0	0	0	0	0	0	0	0	0	0	0	0	0	0	0	942.81	0	561.585	0	0	0	0	0	0	0	0	0	1455.75	0	853.425	0	0	0	0	0	0	0	2013.8	2681.75	0	0	0	0	0	0	0	7833.7	1497.5	0
EIF2S2	0	0	0	0	0	0	0	0	0	0	0	0	0	0	0	47400	39167.5	39810.5	0	0	0	0	0	0	0	0	0	0	0	0	0	0	0	0	0	0	0	0	0	0	0	0	0	0	0	0	0	0	0
EIF3J	0	0	0	0	0	0	0	0	0	0	0	0	0	0	0	276085	372085	315040	0	0	0	0	0	0	0	0	0	0	0	0	0	0	0	0	0	0	0	0	0	0	0	0	0	0	0	0	0	0	0
EIF3L	0	0	0	0	0	0	0	0	0	0	0	0	0	0	0	182485	191775	192015	0	0	0	0	0	0	0	0	0	0	0	0	171235	198305	224960	0	0	0	0	0	0	0	0	0	0	0	0	0	0	0	159635
FUBP3	0	0	0	0	0	0	0	0	0	0	0	0	0	0	0	959.085	1949.9	1513.6	0	0	0	0	0	0	0	0	0	1671.1	1041.42	2264	0	0	0	0	941.475	2385.5	0	481.615	615.88	0	0	0	0	0	0	0	0	0	0
HIBADH	0	0	0	0	0	0	0	0	0	0	0	0	0	0	0	1674.5	0	1368.3	0	0	0	0	1866.55	876.74	0	0	0	0	0	0	0	0	0	0	0	0	0	3217.5	1276.75	0	0	0	2681	0	1896.85	0	0	0	0
HS2ST1	0	0	0	0	0	0	0	0	0	0	0	0	0	0	0	1853	786.43	0	0	0	0	0	0	0	0	0	0	3077.35	654.475	1370.6	0	0	0	0	0	0	0	0	0	0	0	0	0	0	0	448.72	1042.31	1069.3	0
IL1RL1	0	0	0	0	0	0	0	0	0	0	0	0	0	0	0	6014.15	0	1360	0	0	0	0	0	0	0	0	0	0	0	0	0	0	0	0	0	0	0	0	0	0	0	0	0	0	0	0	0	0	0
KCTD17	0	0	0	0	0	0	0	0	0	0	0	0	0	0	0	2287.05	0	1857	0	0	0	0	0	0	0	0	0	0	0	0	0	0	0	0	0	0	0	0	0	0	0	0	0	0	0	0	1866.6	1053.8	0
NECAP1	0	0	0	0	0	0	0	0	0	0	0	0	0	0	0	3386.6	1784.25	2936	0	0	0	0	0	0	0	0	0	0	0	0	0	0	0	0	0	0	0	0	0	0	0	0	0	0	0	2836.2	2471.45	1848.95	0
NUMB	0	0	0	0	0	0	0	0	0	0	0	0	0	0	0	704.75	2364	1192.9	0	0	0	0	0	0	0	0	0	0	0	0	0	0	0	0	0	0	0	2943.95	1325.85	0	0	0	0	0	0	0	0	0	0
PCNT	0	0	0	0	0	0	0	0	0	0	0	0	0	0	0	1423.2	6115.1	6398.5	0	0	0	0	0	0	0	4700	4437.2	0	0	0	0	0	0	0	0	0	0	0	0	0	0	0	0	0	0	5302.1	1282.85	3200.5	6865.2
PSMD14	0	0	0	0	0	0	0	0	0	0	0	0	0	0	0	30764.5	73120	47011.5	0	0	0	0	0	0	0	0	0	0	0	0	0	0	0	0	0	0	0	0	0	0	0	0	0	0	0	0	0	0	0
PSMD3	0	0	0	0	0	0	0	0	0	0	0	0	0	0	0	30266.5	51541.5	41704	0	0	0	0	0	0	0	0	0	0	0	0	0	0	0	0	0	0	0	0	0	0	0	0	0	0	0	0	0	0	0
PSMD9	0	0	0	0	0	0	0	0	0	0	0	0	0	0	0	257.92	2521.5	1036.75	0	0	0	0	2813.85	1717.05	499.435	1065.7	970.21	0	0	0	0	0	0	0	0	0	0	0	0	0	0	0	0	0	0	0	0	0	0
PTBP3	0	0	0	0	0	0	0	0	0	0	0	0	0	0	0	664.82	498.14	473.55	0	0	0	0	0	0	0	0	0	0	2817.6	1407.84	0	0	0	0	0	0	0	0	0	0	0	0	0	0	0	0	0	0	0
RACK1	0	0	0	0	0	0	0	0	0	0	0	0	0	0	0	327580	363550	288000	0	0	0	0	0	0	259230	307855	332620	0	0	0	0	0	0	0	0	0	0	0	0	0	0	0	0	0	0	0	0	0	0
RBBP4	0	0	0	0	0	0	0	0	0	0	0	0	0	0	0	21884.5	58663	38752.5	0	0	0	0	0	0	17836	36686.5	47396.5	21621	27205.5	26783	0	0	0	0	0	0	0	0	0	17213.5	32334.5	17450	0	0	0	0	0	0	0
RPS24	0	0	0	0	0	0	0	0	0	0	0	0	0	0	0	208280	108160	165055	0	0	0	0	0	0	0	0	0	0	0	0	171990	182650	183715	0	0	0	0	0	0	0	0	0	0	0	0	0	0	0	0
SORT1	0	0	0	0	0	0	0	0	0	0	0	0	0	0	0	1287.05	1442.35	1336.9	0	0	0	0	0	0	0	0	0	0	0	0	0	0	0	0	0	0	0	0	0	0	0	0	0	0	0	0	0	0	0
TRIM21	0	0	0	0	0	0	0	0	0	0	0	0	0	0	0	33973.5	43301.5	35820	0	0	0	0	0	0	44458	41738	38412	0	0	0	0	0	0	0	0	0	32112	41263	30823	0	0	0	0	0	0	0	0	0	31164
UBE2D3	0	0	0	0	0	0	0	0	0	0	0	0	0	0	0	259.23	4481.95	1099.9	0	5861.7	5087.7	0	1957.75	5458.2	0	0	0	7571.1	1063.88	4175.75	0	0	0	0	0	0	0	0	0	0	0	0	0	0	0	0	0	0	0
VIM	0	0	0	0	0	0	0	0	0	0	0	0	0	0	0	340.24	102683	27344	0	0	0	0	0	0	0	0	0	0	0	0	0	0	0	0	0	0	0	0	0	0	0	0	0	0	0	0	0	0	0
COBL	0	0	0	0	0	0	0	0	0	0	0	0	0	0	0	0	5556	3529.9	0	2725.26	1654.3	0	0	0	0	2779.55	7246.05	0	5580.8	3268.7	0	0	0	0	0	0	0	0	0	0	0	0	0	0	0	0	0	0	2504.5
H1-3	0	0	0	0	0	0	0	0	0	0	0	0	0	0	0	0	4166.7	1344.2	0	0	0	0	0	0	0	5935.8	13805	34815.5	4130.7	14719	0	22405	9986.2	0	0	0	0	0	0	0	0	0	0	0	0	230.48	19396	5960.15	0
HSP90AB4P	0	0	0	0	0	0	0	0	0	0	0	0	0	0	0	0	970.72	492.735	0	915.105	773.66	0	0	0	0	0	0	0	0	0	0	0	0	0	0	0	0	0	0	0	0	0	0	0	0	0	0	0	0
SH3BGRL	0	0	0	0	0	0	0	0	0	0	0	0	0	0	0	0	2862.4	870.79	0	1391.1	1387.6	0	1033.52	2531	0	0	0	0	0	0	0	0	0	0	0	0	0	0	0	0	0	0	0	0	0	0	0	0	0
SMARCC1	0	0	0	0	0	0	0	0	0	0	0	0	0	0	0	0	2073.05	664.045	0	0	0	0	0	0	0	0	0	0	0	0	0	0	0	0	0	0	0	0	0	0	0	0	0	0	0	0	0	0	0
CSE1L	0	0	0	0	0	0	0	0	0	0	0	0	0	0	0	0	0	0	10621	25616	22433	11445.5	32326.5	38958	0	0	0	0	0	0	0	0	0	0	38370	57977	0	0	0	0	0	0	0	0	0	0	0	0	0
DLG1	0	0	0	0	0	0	0	0	0	0	0	0	0	0	0	0	0	0	11131	0	2760.75	16266	0	2693.15	0	0	0	0	0	0	0	0	0	0	0	0	0	0	0	0	0	0	0	0	0	0	0	0	0
FKBP2	0	0	0	0	0	0	0	0	0	0	0	0	0	0	0	0	0	0	3767.05	5145.9	5540.4	6552.55	0	5785.4	5490.25	5093.6	5385.4	2344.4	2806.95	4248.6	5732.5	13202	10438.5	0	0	0	0	0	0	0	0	0	0	0	0	2191.5	13951.5	10373.5	0
GOT2	0	0	0	0	0	0	0	0	0	0	0	0	0	0	0	0	0	0	16279	21505.5	20961	0	0	0	0	0	0	0	0	0	0	0	0	0	0	0	0	0	0	0	0	0	0	0	0	0	0	0	0
GSTP1	0	0	0	0	0	0	0	0	0	0	0	0	0	0	0	0	0	0	66996	242430	192465	53753	314565	338635	0	0	0	0	0	0	0	0	0	0	0	0	0	0	0	0	0	0	275910	23416	225630	0	0	0	0
KTI12	0	0	0	0	0	0	0	0	0	0	0	0	0	0	0	0	0	0	9791.35	0	1501.51	21522.5	0	7499.7	0	0	0	0	0	0	0	0	0	0	0	0	0	0	0	0	0	0	0	0	0	0	0	0	0
NASP	0	0	0	0	0	0	0	0	0	0	0	0	0	0	0	0	0	0	10785.7	44097.5	42051.5	6773.2	70141	55261.5	0	0	0	0	0	0	0	0	0	0	0	0	0	0	0	0	0	0	0	0	0	0	0	0	0
PFAS	0	0	0	0	0	0	0	0	0	0	0	0	0	0	0	0	0	0	45500	12782	16827	27432.5	6269.65	20200	0	0	0	0	0	0	0	0	0	0	0	0	34249.5	7106.2	1037.5	0	0	0	10389.9	4738.9	12412	0	0	0	0
SLC2A3	0	0	0	0	0	0	0	0	0	0	0	0	0	0	0	0	0	0	7781	30089	21125.5	0	0	0	0	0	0	58679	3947.95	32949	0	0	0	0	27498	37084	0	0	0	0	0	0	0	0	0	0	0	0	0
TUBA1B	0	0	0	0	0	0	0	0	0	0	0	0	0	0	0	0	0	0	277935	251540	245910	288910	258740	294235	0	0	0	460710	161070	309525	0	0	0	0	0	0	0	0	0	0	0	0	353620	142995	325165	0	0	0	0
TUBB8	0	0	0	0	0	0	0	0	0	0	0	0	0	0	0	0	0	0	44776	75259	77033.5	0	0	0	0	0	0	0	0	0	0	0	0	0	0	0	0	0	0	0	0	0	0	0	0	0	0	0	0
ADH5	0	0	0	0	0	0	0	0	0	0	0	0	0	0	0	0	0	0	0	3463.55	2717.9	0	8729.8	9012.95	0	0	0	0	0	0	0	0	0	0	0	0	0	287.624	263.26	2055.6	0	1522.75	7669.7	0	4537.7	0	0	0	0
ADSS2	0	0	0	0	0	0	0	0	0	0	0	0	0	0	0	0	0	0	0	2747.9	1278.65	0	5195.05	4350.05	0	0	0	0	0	0	0	0	0	0	0	0	0	0	0	2872.15	0	1859.9	5245.1	0	4367.2	0	0	0	0
AGMAT	0	0	0	0	0	0	0	0	0	0	0	0	0	0	0	0	0	0	0	561.785	1137.45	0	3575.45	1530.15	0	0	0	0	0	0	0	0	0	0	0	0	0	0	0	0	0	0	1553.75	0	1163.15	0	0	0	0
AKR1A1	0	0	0	0	0	0	0	0	0	0	0	0	0	0	0	0	0	0	0	5298.1	4486.25	0	5825.95	8835.75	0	0	0	0	0	0	0	0	0	0	824.875	1202.1	0	601.38	1261.1	743.095	0	3653.95	2399.5	0	4531.85	0	0	0	0
ALDH1B1	0	0	0	0	0	0	0	0	0	0	0	0	0	0	0	0	0	0	0	842.68	748.15	0	3347.8	2881.75	0	0	0	0	0	0	0	0	0	0	0	0	0	0	0	561.595	0	1026.41	2470	0	1521.85	0	0	0	0
ATL2	0	0	0	0	0	0	0	0	0	0	0	0	0	0	0	0	0	0	0	1906.7	1099.3	0	975.89	2179.9	0	0	0	0	0	0	0	0	0	0	0	0	0	0	0	0	0	0	0	0	0	0	0	0	0
BCAT1	0	0	0	0	0	0	0	0	0	0	0	0	0	0	0	0	0	0	0	1855.15	1425.35	0	7132	6201.7	0	0	0	0	0	0	0	0	0	0	0	0	0	0	0	0	0	0	1581.85	0	601.71	0	0	0	0
BCCIP	0	0	0	0	0	0	0	0	0	0	0	0	0	0	0	0	0	0	0	14476	11302	0	30013.5	22984	0	0	0	0	0	0	0	0	0	0	0	0	0	15026	11535.1	0	0	0	15132	0	9481.9	0	0	0	0
CAMK2B	0	0	0	0	0	0	0	0	0	0	0	0	0	0	0	0	0	0	0	7062.5	3169.95	0	2440.5	1792.5	0	0	0	1548.3	453.3	517.185	0	0	0	0	262.685	953.9	0	2421.3	2185.35	5695.85	0	4451.55	0	0	0	0	0	0	0
CAPN2	0	0	0	0	0	0	0	0	0	0	0	0	0	0	0	0	0	0	0	3047.9	2020.05	0	2016.8	3962.65	0	0	0	0	0	0	0	0	0	0	0	0	0	0	0	0	0	0	987.265	0	1959.8	0	0	0	0
CARHSP1	0	0	0	0	0	0	0	0	0	0	0	0	0	0	0	0	0	0	0	2812.6	1523.88	0	6424.2	5368.35	0	0	0	0	0	0	0	0	0	0	0	0	0	2069.05	1204.8	0	0	0	2279.25	0	1710	0	0	0	0
CAT	0	0	0	0	0	0	0	0	0	0	0	0	0	0	0	0	0	0	0	702.075	511.055	0	9626.15	2631.7	0	0	0	0	0	0	0	0	0	0	0	0	0	561.29	165.736	0	0	0	0	0	0	0	0	0	0
CHMP1A	0	0	0	0	0	0	0	0	0	0	0	0	0	0	0	0	0	0	0	1929.65	1030.25	0	0	0	0	0	0	2427.35	2115.4	2255.05	0	0	0	0	0	0	0	0	0	777.18	0	1360.75	0	0	0	0	0	0	0
CLTA	0	0	0	0	0	0	0	0	0	0	0	0	0	0	0	0	0	0	0	10340.2	5822.2	0	8217.05	6239.05	0	0	0	6650.15	0	2156.85	0	0	0	0	1264.5	344.755	0	8640.85	6654.1	0	0	0	0	0	0	0	0	0	0
CLUH	0	0	0	0	0	0	0	0	0	0	0	0	0	0	0	0	0	0	0	1109.21	793.05	0	1840.9	1772.2	0	0	0	0	0	0	0	0	0	0	0	0	0	666.105	797.97	725.26	0	2215.95	1191.42	0	1878.25	0	0	0	0
CNPY2	0	0	0	0	0	0	0	0	0	0	0	0	0	0	0	0	0	0	0	3437.3	1861.4	0	3747.25	6927.15	0	0	0	0	0	0	0	0	0	0	0	0	0	0	0	0	0	0	728.125	0	571.645	0	0	0	0
COMT	0	0	0	0	0	0	0	0	0	0	0	0	0	0	0	0	0	0	0	1542.55	888.855	0	6726.55	6980.5	0	0	0	0	0	0	0	0	0	0	0	0	0	1807.65	1615.95	0	0	0	2202.4	0	2359.3	0	0	0	0
CRABP1	0	0	0	0	0	0	0	0	0	0	0	0	0	0	0	0	0	0	0	2411.25	2852.3	0	3896.3	3802.7	0	0	0	0	0	0	0	0	0	0	0	0	0	0	0	0	0	0	1775.45	0	3038.6	0	0	0	0
DDAH2	0	0	0	0	0	0	0	0	0	0	0	0	0	0	0	0	0	0	0	3229.8	2081.4	0	4272.45	5743.7	0	0	0	0	0	0	0	0	0	0	0	0	0	0	0	0	0	0	0	0	0	0	0	0	0
DPP8	0	0	0	0	0	0	0	0	0	0	0	0	0	0	0	0	0	0	0	2044.05	1101.78	0	2544.1	2554.1	0	0	0	0	0	0	0	0	0	0	0	0	0	0	0	0	0	0	0	0	0	0	0	0	0
DPP9	0	0	0	0	0	0	0	0	0	0	0	0	0	0	0	0	0	0	0	1009.75	1879.65	0	2877	2548.15	0	0	0	0	0	0	0	0	0	0	0	0	0	0	0	825.995	0	1342.67	920.56	0	1199	0	0	0	0
ECHDC1	0	0	0	0	0	0	0	0	0	0	0	0	0	0	0	0	0	0	0	962.165	1494.1	0	2287.25	3505.95	0	0	0	0	0	0	0	0	0	0	442.575	1104.05	0	1104.25	781.985	0	0	0	0	0	0	0	0	0	0
FABP5	0	0	0	0	0	0	0	0	0	0	0	0	0	0	0	0	0	0	0	7364.7	5330.65	0	4546.95	9849.5	528.57	423.24	839.6	3829.9	385.54	2227.15	0	0	0	0	0	0	0	0	0	3689.05	0	2831.8	9583.15	0	8828.1	0	0	0	0
GALM	0	0	0	0	0	0	0	0	0	0	0	0	0	0	0	0	0	0	0	3839.7	1677.85	0	5469.7	7276.15	0	0	0	0	0	0	0	0	0	0	0	0	0	0	0	0	0	0	2199.75	0	2496.5	0	0	0	0
HLA-C	0	0	0	0	0	0	0	0	0	0	0	0	0	0	0	0	0	0	0	1510.65	1333.75	0	0	0	0	0	0	6477.65	0	2402.9	0	0	0	0	0	0	0	0	0	1383.45	0	1598.2	1746.8	0	1790.35	0	0	0	0
HPRT1	0	0	0	0	0	0	0	0	0	0	0	0	0	0	0	0	0	0	0	2617.2	1693.05	0	4661.15	4810.95	0	0	0	0	0	0	0	0	0	0	0	0	0	0	0	2654.8	0	1071.6	5253.35	0	3111.65	0	0	0	0
ISOC1	0	0	0	0	0	0	0	0	0	0	0	0	0	0	0	0	0	0	0	739.395	691.135	0	2688.8	2489.15	0	0	0	0	0	0	0	0	0	0	0	0	0	0	0	0	0	0	1106.85	0	683.49	0	0	0	0
ITGB1	0	0	0	0	0	0	0	0	0	0	0	0	0	0	0	0	0	0	0	818.5	884.575	0	373.4	663.51	0	0	0	7888.6	0	3541.95	0	0	0	0	0	0	0	0	0	1366.55	0	890.01	0	0	0	0	0	0	0
ITPR3	0	0	0	0	0	0	0	0	0	0	0	0	0	0	0	0	0	0	0	6207.9	1124.4	0	2220.65	717	0	0	0	0	0	0	0	0	0	0	185.825	102.08	0	5057.85	1768.85	1060.81	0	386.025	0	0	0	0	0	0	0
LYPLA1	0	0	0	0	0	0	0	0	0	0	0	0	0	0	0	0	0	0	0	1280.8	1823	0	0	0	0	0	0	0	0	0	0	0	0	0	0	0	0	0	0	0	0	0	0	0	0	0	0	0	0
PAFAH1B2	0	0	0	0	0	0	0	0	0	0	0	0	0	0	0	0	0	0	0	4425.45	3344.25	0	3259.15	3788.55	0	0	0	0	0	0	0	0	0	0	0	0	0	0	0	0	0	0	0	0	0	0	0	0	0
PDZK1	0	0	0	0	0	0	0	0	0	0	0	0	0	0	0	0	0	0	0	1324.8	864.28	0	651.735	1375.4	0	0	0	0	0	0	0	0	0	0	0	0	0	813.915	497.535	0	0	0	0	0	0	0	0	0	0
POFUT1	0	0	0	0	0	0	0	0	0	0	0	0	0	0	0	0	0	0	0	3293.75	1181.42	0	7525.55	3701.2	0	0	0	0	0	0	0	0	0	0	0	0	0	0	0	747.8	0	109.907	2279.25	0	1506.35	0	0	0	0
POLD3	0	0	0	0	0	0	0	0	0	0	0	0	0	0	0	0	0	0	0	1243.5	849.215	0	1815.65	1278.9	0	0	0	2435.15	0	891.055	0	0	0	0	0	0	0	0	0	0	0	0	0	0	0	0	0	0	0
PPME1	0	0	0	0	0	0	0	0	0	0	0	0	0	0	0	0	0	0	0	2883.95	1222.25	0	4710.55	5512.85	0	0	0	0	0	0	0	0	0	0	0	0	0	3141.8	563.9	1495.4	0	1732.4	4774.3	0	3304.7	0	0	0	0
PPP3CA	0	0	0	0	0	0	0	0	0	0	0	0	0	0	0	0	0	0	0	1929.85	1556.7	0	1811.5	3145.85	0	0	0	0	0	0	0	0	0	0	0	0	0	3265.2	995.885	0	0	0	1073.83	0	1430.9	0	0	0	0
PREP	0	0	0	0	0	0	0	0	0	0	0	0	0	0	0	0	0	0	0	1280.04	264.035	273.6	7789.5	4850.15	0	0	0	0	0	0	0	0	0	0	0	0	0	844.455	753.955	0	0	0	4555.05	0	1606.75	0	0	0	0
PSPH	0	0	0	0	0	0	0	0	0	0	0	0	0	0	0	0	0	0	0	3081.8	1972.8	0	6216.8	5024.95	0	0	0	0	0	0	0	0	0	0	0	0	0	0	0	1297.65	0	783.9	3751.95	0	1504.55	0	0	0	0
RAB2A	0	0	0	0	0	0	0	0	0	0	0	0	0	0	0	0	0	0	0	2503.75	917.865	0	2877.15	3607.05	0	0	0	17556	0	6672.95	0	0	0	0	1598.2	6598.85	0	11668	4425.95	0	0	0	5751.1	0	2684.45	0	0	0	0
RPRD1B	0	0	0	0	0	0	0	0	0	0	0	0	0	0	0	0	0	0	0	332.59	492.15	0	5432.5	3974.2	0	0	0	534.79	0	367.77	0	0	0	0	501.16	142.755	0	3355.9	963.485	0	0	0	2203.15	0	471.065	0	0	0	0
SEC24D	0	0	0	0	0	0	0	0	0	0	0	0	0	0	0	0	0	0	0	2030.65	1115.16	0	2557.3	4218.3	0	0	0	0	0	0	0	0	0	0	0	0	0	0	0	0	0	0	0	0	0	0	0	0	0
SERPINB6	0	0	0	0	0	0	0	0	0	0	0	0	0	0	0	0	0	0	0	2165.75	1172	0	4940.8	4802.75	0	0	0	0	0	0	0	0	0	0	0	0	0	0	0	2532.25	0	2176.9	4335.75	0	3594.2	0	0	0	0
SGTA	0	0	0	0	0	0	0	0	0	0	0	0	0	0	0	0	0	0	0	1333.4	977.955	0	5212.5	4987.25	0	0	0	0	0	0	0	0	0	0	0	0	0	959.755	1069.04	0	0	0	1105.87	0	1119.52	0	0	0	0
SH3GL1	0	0	0	0	0	0	0	0	0	0	0	0	0	0	0	0	0	0	0	1909.4	1043.07	0	5339.45	3710.65	0	0	0	0	0	0	0	0	0	0	0	0	0	0	0	0	0	0	3623	0	1017	0	0	0	0
SPINT1	0	0	0	0	0	0	0	0	0	0	0	0	0	0	0	0	0	0	0	1430.03	1371.25	0	0	0	0	0	0	0	0	0	0	0	0	0	0	0	0	0	0	0	0	0	0	0	0	0	0	0	0
STMN2	0	0	0	0	0	0	0	0	0	0	0	0	0	0	0	0	0	0	0	1203.3	2417.95	0	4063.95	6565.45	0	0	0	0	0	0	0	0	0	0	0	0	0	0	0	0	0	0	2073.05	0	509.925	0	0	0	0
TPD52L2	0	0	0	0	0	0	0	0	0	0	0	0	0	0	0	0	0	0	0	7524.1	8102.05	0	15063.2	18385.2	0	0	0	0	0	0	0	0	0	0	0	0	0	1774.3	1117.83	0	0	0	2654.2	0	1466.05	0	0	0	0
TPRN	0	0	0	0	0	0	0	0	0	0	0	0	0	0	0	0	0	0	0	3340.75	1860.65	0	2804	2052.1	0	0	0	0	0	0	0	0	0	0	0	0	0	0	0	0	0	0	0	0	0	0	0	0	0
TSG101	0	0	0	0	0	0	0	0	0	0	0	0	0	0	0	0	0	0	0	1217.35	894.685	0	0	0	0	0	0	0	0	0	0	0	0	0	0	0	0	4094.15	2248.2	0	0	0	0	0	0	0	0	0	0
UBE2C	0	0	0	0	0	0	0	0	0	0	0	0	0	0	0	0	0	0	0	878.04	668.61	0	1953.65	2554.55	0	0	0	0	0	0	0	0	0	0	0	0	0	0	0	0	0	0	1326.5	0	3500.35	0	0	0	0
UBE2N	0	0	0	0	0	0	0	0	0	0	0	0	0	0	0	0	0	0	0	20662	11866.5	0	31890	25350.5	0	0	0	0	0	0	0	0	0	0	0	0	0	0	0	0	0	0	0	0	0	0	0	0	0
UCHL1	0	0	0	0	0	0	0	0	0	0	0	0	0	0	0	0	0	0	0	852.355	2705.3	0	8891.45	3723.65	0	0	0	0	0	0	0	0	0	0	0	0	0	3277.2	1588.15	0	0	0	2542.35	0	1004.58	0	0	0	0
VPS29	0	0	0	0	0	0	0	0	0	0	0	0	0	0	0	0	0	0	0	825.56	984.57	0	3133	1326	0	0	0	0	0	0	0	0	0	0	0	0	0	0	0	0	0	0	0	0	0	0	0	0	0
ZC3H6	0	0	0	0	0	0	0	0	0	0	0	0	0	0	0	0	0	0	0	3077.95	2429.8	0	0	0	0	0	0	0	0	0	0	0	0	0	0	0	0	0	0	0	0	0	2172.65	0	1817.05	0	0	0	0
ACLY	0	0	0	0	0	0	0	0	0	0	0	0	0	0	0	0	0	0	0	0	0	4171.9	28984	27227	0	0	0	0	0	0	0	0	0	0	0	0	0	0	0	0	0	0	0	0	0	0	0	0	0
CAND1	0	0	0	0	0	0	0	0	0	0	0	0	0	0	0	0	0	0	0	0	0	2459	26698	24823	0	0	0	0	0	0	0	0	0	0	0	0	0	0	0	0	0	0	0	0	0	0	0	0	0
DDX19A	0	0	0	0	0	0	0	0	0	0	0	0	0	0	0	0	0	0	0	0	0	998.715	9414.9	9327.3	0	0	0	0	0	0	0	0	0	0	0	0	0	0	0	0	0	0	7480.55	0	5652.9	0	0	0	0
EIF6	0	0	0	0	0	0	0	0	0	0	0	0	0	0	0	0	0	0	0	0	0	27158	43943.5	44609	0	0	0	0	0	0	0	0	0	0	0	0	0	0	0	0	0	0	0	0	0	0	0	0	0
GPI	0	0	0	0	0	0	0	0	0	0	0	0	0	0	0	0	0	0	0	0	0	12868.5	91252	60807.5	0	0	0	0	0	0	0	0	0	0	0	0	0	0	0	57129	16152	39266	75473	9191.1	50644.5	0	0	0	0
HAGH	0	0	0	0	0	0	0	0	0	0	0	0	0	0	0	0	0	0	0	0	0	3687.3	492.61	1406.41	2372.7	984.215	0	0	0	0	0	0	0	0	0	0	0	0	0	0	0	0	0	0	0	0	0	0	0
PDIA3	0	0	0	0	0	0	0	0	0	0	0	0	0	0	0	0	0	0	0	0	0	256.59	60445	70529	0	0	0	0	0	0	0	0	0	0	0	0	0	0	0	0	0	0	37279	3958.85	35833.5	0	0	0	0
PGAM1	0	0	0	0	0	0	0	0	0	0	0	0	0	0	0	0	0	0	0	0	0	580.96	56750	46770	0	0	0	0	0	0	0	0	0	0	0	0	0	0	0	0	0	0	0	0	0	0	0	0	0
PKM	0	0	0	0	0	0	0	0	0	0	0	0	0	0	0	0	0	0	0	0	0	36457	91995	76683.5	0	0	0	0	0	0	0	0	0	0	0	0	0	0	0	0	0	0	0	0	0	0	0	0	0
RARS1	0	0	0	0	0	0	0	0	0	0	0	0	0	0	0	0	0	0	0	0	0	4064.05	18899.5	14771	0	0	0	0	0	0	0	0	0	0	0	0	0	0	0	0	0	0	21068	829.555	16550.5	0	0	0	0
RPL17	0	0	0	0	0	0	0	0	0	0	0	0	0	0	0	0	0	0	0	0	0	42147.5	14914.5	12792.5	0	0	0	0	0	0	0	0	0	0	0	0	10871.6	27104	25246.5	0	0	0	0	0	0	0	0	0	0
SRSF2	0	0	0	0	0	0	0	0	0	0	0	0	0	0	0	0	0	0	0	0	0	23212	37877.5	15401	36201	29104.5	22039	29278	21754	29531.5	0	0	0	0	0	0	16632	32764	29500.5	0	0	0	0	0	0	0	0	0	0
AAGAB	0	0	0	0	0	0	0	0	0	0	0	0	0	0	0	0	0	0	0	0	0	0	1417.2	1460.75	0	0	0	0	0	0	0	0	0	0	0	0	0	0	0	0	0	0	0	0	0	0	0	0	0
ABHD14B	0	0	0	0	0	0	0	0	0	0	0	0	0	0	0	0	0	0	0	0	0	0	1289.25	1187.9	0	0	0	0	0	0	0	0	0	0	0	0	0	0	0	0	0	0	0	0	0	0	0	0	0
ACO1	0	0	0	0	0	0	0	0	0	0	0	0	0	0	0	0	0	0	0	0	0	0	5881.25	2828.9	0	0	0	0	0	0	0	0	0	0	0	0	0	14033.5	9461.5	0	0	0	0	0	0	0	0	0	0
ACSF2	0	0	0	0	0	0	0	0	0	0	0	0	0	0	0	0	0	0	0	0	0	0	2241.55	1285.35	0	0	0	0	0	0	0	0	0	0	0	0	0	0	0	0	0	0	0	0	0	0	0	0	0
ACY1	0	0	0	0	0	0	0	0	0	0	0	0	0	0	0	0	0	0	0	0	0	0	2843.8	2122.95	0	0	0	0	0	0	0	0	0	0	0	0	0	0	0	0	0	0	1245.2	0	1354	0	0	0	0
ADD3	0	0	0	0	0	0	0	0	0	0	0	0	0	0	0	0	0	0	0	0	0	0	1365.1	4161.45	0	0	0	0	0	0	0	0	0	0	0	0	0	0	0	823.87	0	768.03	2437.15	0	1421.5	0	0	0	0
ADI1	0	0	0	0	0	0	0	0	0	0	0	0	0	0	0	0	0	0	0	0	0	0	861.97	1792.45	0	0	0	0	0	0	0	0	0	0	0	0	0	0	0	0	0	0	1193	0	505.54	0	0	0	0
AIP	0	0	0	0	0	0	0	0	0	0	0	0	0	0	0	0	0	0	0	0	0	0	5421.65	3936.05	0	0	0	0	0	0	0	0	0	0	0	0	0	1634.9	1110.55	0	0	0	0	0	0	0	0	0	0
AKR1B1	0	0	0	0	0	0	0	0	0	0	0	0	0	0	0	0	0	0	0	0	0	0	835.03	3476.3	0	0	0	0	0	0	0	0	0	0	0	0	0	0	0	0	0	0	2749.7	0	1809.85	0	0	0	0
AKR1C3	0	0	0	0	0	0	0	0	0	0	0	0	0	0	0	0	0	0	0	0	0	0	1156.1	622.045	0	0	0	0	0	0	0	0	0	0	0	0	0	0	0	0	0	0	0	0	0	0	0	0	0
AKR7A2	0	0	0	0	0	0	0	0	0	0	0	0	0	0	0	0	0	0	0	0	0	0	5653.55	4787	0	0	0	0	0	0	0	0	0	0	0	0	0	0	0	1547.15	0	665.1	1296.75	0	1192.2	0	0	0	0
ALAD	0	0	0	0	0	0	0	0	0	0	0	0	0	0	0	0	0	0	0	0	0	0	1368.6	1238.8	0	0	0	0	0	0	0	0	0	0	0	0	0	0	0	0	0	0	0	0	0	0	0	0	0
AMACR	0	0	0	0	0	0	0	0	0	0	0	0	0	0	0	0	0	0	0	0	0	0	2006.35	2144.5	0	0	0	0	0	0	0	0	0	0	0	0	0	2169.85	1349.1	0	0	0	0	0	0	0	0	0	0
ANK3	0	0	0	0	0	0	0	0	0	0	0	0	0	0	0	0	0	0	0	0	0	0	17095.5	20495	0	0	0	0	0	0	0	0	0	0	0	0	0	0	0	0	0	0	0	0	0	0	0	0	0
ARAP1	0	0	0	0	0	0	0	0	0	0	0	0	0	0	0	0	0	0	0	0	0	0	523.97	241.235	0	0	0	0	0	0	0	0	0	0	0	0	0	0	0	0	0	0	0	0	0	0	0	0	0
ARFIP1	0	0	0	0	0	0	0	0	0	0	0	0	0	0	0	0	0	0	0	0	0	0	1713.8	1656.55	0	0	0	0	0	0	0	0	0	0	0	0	0	316.6	375.355	0	0	0	551.95	0	948.155	0	0	0	0
ARFIP2	0	0	0	0	0	0	0	0	0	0	0	0	0	0	0	0	0	0	0	0	0	0	1434.35	480.86	0	0	0	0	0	0	0	0	0	0	0	0	0	0	0	0	0	0	0	0	0	0	0	0	0
ARHGAP1	0	0	0	0	0	0	0	0	0	0	0	0	0	0	0	0	0	0	0	0	0	0	5487.95	3124.3	0	0	0	0	0	0	0	0	0	0	0	0	0	486.955	469.98	0	0	0	1598.65	0	946.185	0	0	0	0
ARHGEF1	0	0	0	0	0	0	0	0	0	0	0	0	0	0	0	0	0	0	0	0	0	0	4920.3	1456.15	0	0	0	0	0	0	0	0	0	0	0	0	0	1224.95	806.12	0	0	0	0	0	0	0	0	0	0
ARL15	0	0	0	0	0	0	0	0	0	0	0	0	0	0	0	0	0	0	0	0	0	0	1640.75	664.075	0	0	0	0	0	0	0	0	0	0	0	0	0	0	0	0	0	0	0	0	0	0	0	0	0
ARMT1	0	0	0	0	0	0	0	0	0	0	0	0	0	0	0	0	0	0	0	0	0	0	2941.45	352.875	0	0	0	0	0	0	0	0	0	0	0	0	0	544.635	276.795	0	0	0	0	0	0	0	0	0	0
ASL	0	0	0	0	0	0	0	0	0	0	0	0	0	0	0	0	0	0	0	0	0	0	6032.15	4797.35	0	0	0	0	2233.8	2640.35	0	0	0	0	0	0	0	0	0	3045.85	0	3867.65	3914.65	0	3619.35	0	0	0	0
ATOX1	0	0	0	0	0	0	0	0	0	0	0	0	0	0	0	0	0	0	0	0	0	0	3508.4	1472.85	0	0	0	0	0	0	0	0	0	0	0	0	0	0	0	0	0	0	1313.42	0	395.8	0	0	0	0
ATP6V1D	0	0	0	0	0	0	0	0	0	0	0	0	0	0	0	0	0	0	0	0	0	0	3724.45	5752.7	0	0	0	0	0	0	0	0	0	0	0	0	0	2195.55	1457.95	0	0	0	0	0	0	0	0	0	0
BAX	0	0	0	0	0	0	0	0	0	0	0	0	0	0	0	0	0	0	0	0	0	0	4447.05	3273.1	0	0	0	0	0	0	0	0	0	0	1392.25	1402.65	0	0	0	0	0	0	3888.5	0	2325.95	0	0	0	0
BCAM	0	0	0	0	0	0	0	0	0	0	0	0	0	0	0	0	0	0	0	0	0	0	1223	1006.31	0	0	0	1552.7	0	2309.93	0	0	0	0	458.22	1171.55	0	0	0	1559.85	0	1202.94	0	0	0	0	0	0	0
BID	0	0	0	0	0	0	0	0	0	0	0	0	0	0	0	0	0	0	0	0	0	0	3023.75	1039.09	0	0	0	0	0	0	0	0	0	0	0	0	0	0	0	0	0	0	0	0	0	0	0	0	0
BLMH	0	0	0	0	0	0	0	0	0	0	0	0	0	0	0	0	0	0	0	0	0	0	7989.6	3308.15	0	0	0	0	0	0	0	0	0	0	0	0	0	444.325	719.435	0	0	0	3761.05	0	309.9	0	0	0	0
BPNT1	0	0	0	0	0	0	0	0	0	0	0	0	0	0	0	0	0	0	0	0	0	0	5096.25	5682.2	0	0	0	0	0	0	0	0	0	0	0	0	0	0	0	0	0	0	2753.85	0	1773	0	0	0	0
CARS1	0	0	0	0	0	0	0	0	0	0	0	0	0	0	0	0	0	0	0	0	0	0	1395.15	612.405	0	0	0	0	0	0	0	0	0	0	0	0	0	0	0	0	0	0	0	0	0	0	0	0	0
CDK6	0	0	0	0	0	0	0	0	0	0	0	0	0	0	0	0	0	0	0	0	0	0	6300.8	871.705	0	0	0	0	0	0	0	0	0	0	599.535	460.265	0	1411.35	254.865	0	0	0	1772.05	0	175.289	0	0	0	0
CES1	0	0	0	0	0	0	0	0	0	0	0	0	0	0	0	0	0	0	0	0	0	0	2059.15	1511.95	0	0	0	0	0	0	0	0	0	0	0	0	0	0	0	0	0	0	1081.3	0	1252.2	0	0	0	0
CHMP4A	0	0	0	0	0	0	0	0	0	0	0	0	0	0	0	0	0	0	0	0	0	0	2537.7	2904.65	0	0	0	0	0	0	0	0	0	0	0	0	0	0	0	0	0	0	0	0	0	0	0	0	0
CHORDC1	0	0	0	0	0	0	0	0	0	0	0	0	0	0	0	0	0	0	0	0	0	0	62092	44819	0	0	0	0	0	0	0	0	0	0	0	0	0	0	0	0	0	0	48015	5587.65	29951.5	0	0	0	0
CIAPIN1	0	0	0	0	0	0	0	0	0	0	0	0	0	0	0	0	0	0	0	0	0	0	1231.69	1601.35	0	0	0	0	0	0	0	0	0	0	0	0	0	0	0	0	0	0	1061.27	0	1485.1	0	0	0	0
COPS2	0	0	0	0	0	0	0	0	0	0	0	0	0	0	0	0	0	0	0	0	0	0	3152.1	2115.15	0	0	0	0	0	0	0	0	0	0	0	0	0	2277.6	739.725	0	0	0	0	0	0	0	0	0	0
COPS5	0	0	0	0	0	0	0	0	0	0	0	0	0	0	0	0	0	0	0	0	0	0	2030.75	722.645	0	0	0	0	0	0	0	0	0	0	0	0	0	984.42	962.22	0	0	0	0	0	0	0	0	0	0
COPS6	0	0	0	0	0	0	0	0	0	0	0	0	0	0	0	0	0	0	0	0	0	0	3106.45	2450.9	0	0	0	0	0	0	0	0	0	0	390.06	744.49	0	2129.1	1079.27	0	0	0	1308.85	0	598.73	0	0	0	0
CPOX	0	0	0	0	0	0	0	0	0	0	0	0	0	0	0	0	0	0	0	0	0	0	1599.3	1152.9	0	0	0	0	0	0	0	0	0	0	0	0	0	1120.37	1085.04	0	0	0	0	0	0	0	0	0	0
CPPED1	0	0	0	0	0	0	0	0	0	0	0	0	0	0	0	0	0	0	0	0	0	0	3317.35	3281.65	0	0	0	0	0	0	0	0	0	0	0	0	0	0	0	0	0	0	0	0	0	0	0	0	0
CRK	0	0	0	0	0	0	0	0	0	0	0	0	0	0	0	0	0	0	0	0	0	0	3193	1304.35	0	0	0	0	0	0	0	0	0	0	0	0	0	0	0	0	0	0	0	0	0	0	0	0	0
CRLF3	0	0	0	0	0	0	0	0	0	0	0	0	0	0	0	0	0	0	0	0	0	0	998.215	408.795	0	0	0	0	0	0	0	0	0	0	0	0	0	0	0	0	0	0	0	0	0	0	0	0	0
CUL1	0	0	0	0	0	0	0	0	0	0	0	0	0	0	0	0	0	0	0	0	0	0	1469.05	888.83	0	0	0	0	0	0	0	0	0	0	2305.35	2043.95	0	2084.9	1453.55	2173.95	0	1548.75	2677	0	1223.4	0	0	0	0
CUL4B	0	0	0	0	0	0	0	0	0	0	0	0	0	0	0	0	0	0	0	0	0	0	1071.15	583.38	0	0	0	0	0	0	0	0	0	0	0	0	0	0	0	0	0	0	0	0	0	0	0	0	0
CUTA	0	0	0	0	0	0	0	0	0	0	0	0	0	0	0	0	0	0	0	0	0	0	8744.8	4791.35	0	0	0	0	0	0	0	0	0	0	0	0	0	0	0	0	0	0	0	0	0	0	0	0	0
CYRIB	0	0	0	0	0	0	0	0	0	0	0	0	0	0	0	0	0	0	0	0	0	0	3230.35	2292.4	0	0	0	0	0	0	0	0	0	0	0	0	0	0	0	0	0	0	2782.05	0	966.49	0	0	0	0
DAPK3	0	0	0	0	0	0	0	0	0	0	0	0	0	0	0	0	0	0	0	0	0	0	899.67	1726.15	0	0	0	0	0	0	0	0	0	0	0	0	0	0	0	0	0	0	0	0	0	0	0	0	0
DBI	0	0	0	0	0	0	0	0	0	0	0	0	0	0	0	0	0	0	0	0	0	0	26904	21403.5	0	0	0	0	0	0	0	0	0	0	0	0	0	0	0	0	0	0	0	0	0	0	0	0	0
DCPS	0	0	0	0	0	0	0	0	0	0	0	0	0	0	0	0	0	0	0	0	0	0	2705.3	1360.47	0	0	0	0	0	0	0	0	0	0	0	0	0	0	0	0	0	0	0	0	0	0	0	0	0
DDT	0	0	0	0	0	0	0	0	0	0	0	0	0	0	0	0	0	0	0	0	0	0	5364.6	3315.55	0	0	0	0	0	0	0	0	0	0	0	0	0	1521.05	816.84	0	0	0	2181.85	0	561.195	0	0	0	0
DERA	0	0	0	0	0	0	0	0	0	0	0	0	0	0	0	0	0	0	0	0	0	0	2806.1	2387.7	0	0	0	0	0	0	0	0	0	0	0	0	0	0	0	0	0	0	3018.35	0	1092.35	0	0	0	0
DFFA	0	0	0	0	0	0	0	0	0	0	0	0	0	0	0	0	0	0	0	0	0	0	6216.75	3193.85	0	0	0	0	0	0	0	0	0	0	0	0	0	2925.2	1129.95	0	0	0	0	0	0	0	0	0	0
DHFR	0	0	0	0	0	0	0	0	0	0	0	0	0	0	0	0	0	0	0	0	0	0	1326.55	3468.75	0	0	0	0	0	0	0	0	0	0	1989.7	1151.5	0	0	0	0	0	0	0	0	0	0	0	0	0
DNAAF5	0	0	0	0	0	0	0	0	0	0	0	0	0	0	0	0	0	0	0	0	0	0	872.945	584.83	0	0	0	0	0	0	0	0	0	0	0	0	0	0	0	0	0	0	0	0	0	0	0	0	0
DNPEP	0	0	0	0	0	0	0	0	0	0	0	0	0	0	0	0	0	0	0	0	0	0	1937.55	550.99	0	0	0	0	0	0	0	0	0	0	0	0	0	0	0	0	0	0	0	0	0	0	0	0	0
DPYSL3	0	0	0	0	0	0	0	0	0	0	0	0	0	0	0	0	0	0	0	0	0	0	1885.7	543.36	0	0	0	0	0	0	0	0	0	0	0	0	0	0	0	0	0	0	0	0	0	0	0	0	0
DUSP3	0	0	0	0	0	0	0	0	0	0	0	0	0	0	0	0	0	0	0	0	0	0	1978.25	1407.19	0	0	0	665.43	183.55	567.525	0	0	0	0	0	0	0	0	0	0	0	0	6982.4	0	1942.2	0	0	0	0
DUT	0	0	0	0	0	0	0	0	0	0	0	0	0	0	0	0	0	0	0	0	0	0	3606.25	3107.2	0	0	0	0	0	0	0	0	0	0	0	0	0	0	0	0	0	0	1897.2	0	1003.96	0	0	0	0
EIPR1	0	0	0	0	0	0	0	0	0	0	0	0	0	0	0	0	0	0	0	0	0	0	1122.67	1512.91	0	0	0	0	0	0	0	0	0	0	1124.85	1616.45	0	620.405	1034.95	0	0	0	0	0	0	0	0	0	0
ENOPH1	0	0	0	0	0	0	0	0	0	0	0	0	0	0	0	0	0	0	0	0	0	0	2054.7	1402.8	0	0	0	0	0	0	0	0	0	0	0	0	0	585.78	356.82	0	0	0	629.365	0	290.495	0	0	0	0
EXOSC4	0	0	0	0	0	0	0	0	0	0	0	0	0	0	0	0	0	0	0	0	0	0	457.865	1046.57	0	0	0	1472.3	405.58	1311.8	0	0	0	0	0	0	0	0	0	0	0	0	1399.9	0	1215.15	0	0	0	0
FADD	0	0	0	0	0	0	0	0	0	0	0	0	0	0	0	0	0	0	0	0	0	0	2359.05	1388.64	0	0	0	0	0	0	0	0	0	0	0	0	0	0	0	0	0	0	0	0	0	0	0	0	0
FAHD1	0	0	0	0	0	0	0	0	0	0	0	0	0	0	0	0	0	0	0	0	0	0	936.435	731.96	0	0	0	0	0	0	0	0	0	0	0	0	0	0	0	0	0	0	0	0	0	0	0	0	0
FAM118A	0	0	0	0	0	0	0	0	0	0	0	0	0	0	0	0	0	0	0	0	0	0	904.555	491.56	0	0	0	0	0	0	0	0	0	0	0	0	0	1559.25	754.53	0	0	0	0	0	0	0	0	0	0
FASN	0	0	0	0	0	0	0	0	0	0	0	0	0	0	0	0	0	0	0	0	0	0	44703.5	40609.5	0	0	0	0	0	0	0	0	0	0	0	0	0	0	0	0	0	0	0	0	0	0	0	0	0
FBXO22	0	0	0	0	0	0	0	0	0	0	0	0	0	0	0	0	0	0	0	0	0	0	2962.7	1574.5	0	0	0	0	0	0	0	0	0	0	0	0	0	0	0	0	0	0	0	0	0	0	0	0	0
FDX1	0	0	0	0	0	0	0	0	0	0	0	0	0	0	0	0	0	0	0	0	0	0	803.6	546.575	0	0	0	0	0	0	0	0	0	0	0	0	0	0	0	0	0	0	0	0	0	0	0	0	0
FKBP1A	0	0	0	0	0	0	0	0	0	0	0	0	0	0	0	0	0	0	0	0	0	0	7634	4448.2	0	0	0	0	0	0	0	0	0	0	0	0	0	0	0	0	0	0	2180.4	0	536.05	0	0	0	0
FKBP4	0	0	0	0	0	0	0	0	0	0	0	0	0	0	0	0	0	0	0	0	0	0	39892	33162.5	0	0	0	0	0	0	0	0	0	0	0	0	0	0	0	0	0	0	0	0	0	0	0	0	0
FKBP5	0	0	0	0	0	0	0	0	0	0	0	0	0	0	0	0	0	0	0	0	0	0	1399.5	1044.18	0	0	0	0	0	0	0	0	0	0	0	0	0	1311.91	908.34	0	0	0	0	0	0	0	0	0	0
FN3K	0	0	0	0	0	0	0	0	0	0	0	0	0	0	0	0	0	0	0	0	0	0	1468.5	843.755	0	0	0	0	0	0	0	0	0	0	1801.15	686.885	0	0	0	0	0	0	0	0	0	0	0	0	0
FOXK1	0	0	0	0	0	0	0	0	0	0	0	0	0	0	0	0	0	0	0	0	0	0	1634.5	485	0	0	0	532.735	0	285.28	0	0	0	0	0	0	0	0	0	0	0	0	0	0	0	0	0	0	0
GALE	0	0	0	0	0	0	0	0	0	0	0	0	0	0	0	0	0	0	0	0	0	0	2901.35	1565.5	0	0	0	0	0	0	0	0	0	0	0	0	0	0	0	0	0	0	1182.3	0	649.675	0	0	0	0
GALK1	0	0	0	0	0	0	0	0	0	0	0	0	0	0	0	0	0	0	0	0	0	0	2056.45	1792.7	0	0	0	0	0	0	0	0	0	0	0	0	0	0	0	0	0	0	0	0	0	0	0	0	0
GAMT	0	0	0	0	0	0	0	0	0	0	0	0	0	0	0	0	0	0	0	0	0	0	3291.25	973.365	0	0	0	0	0	0	0	0	0	0	0	0	0	0	0	0	0	0	0	0	0	0	0	0	0
GAS2	0	0	0	0	0	0	0	0	0	0	0	0	0	0	0	0	0	0	0	0	0	0	1420.45	656.365	0	0	0	0	0	0	0	0	0	0	0	0	0	0	0	0	0	0	0	0	0	0	0	0	0
GCSH	0	0	0	0	0	0	0	0	0	0	0	0	0	0	0	0	0	0	0	0	0	0	4568.95	2089.45	0	0	0	0	0	0	0	0	0	0	0	0	0	0	0	0	0	0	0	0	0	0	0	0	0
GFUS	0	0	0	0	0	0	0	0	0	0	0	0	0	0	0	0	0	0	0	0	0	0	1805	967.47	0	0	0	0	0	0	0	0	0	0	0	0	0	0	0	0	0	0	0	0	0	0	0	0	0
GIPC1	0	0	0	0	0	0	0	0	0	0	0	0	0	0	0	0	0	0	0	0	0	0	779.795	1002.89	0	0	0	0	0	0	0	0	0	0	0	0	0	875.035	610.685	0	0	0	0	0	0	0	0	0	0
GLMN	0	0	0	0	0	0	0	0	0	0	0	0	0	0	0	0	0	0	0	0	0	0	2117.65	842.155	0	0	0	0	0	0	0	0	0	0	0	0	0	1512.5	842.9	0	0	0	0	0	0	0	0	0	0
GLO1	0	0	0	0	0	0	0	0	0	0	0	0	0	0	0	0	0	0	0	0	0	0	25498.5	13763	0	0	0	0	0	0	0	0	0	0	0	0	0	0	0	0	0	0	0	0	0	0	0	0	0
GLOD4	0	0	0	0	0	0	0	0	0	0	0	0	0	0	0	0	0	0	0	0	0	0	1223.05	2085.85	0	0	0	0	0	0	0	0	0	0	0	0	0	0	0	0	0	0	0	0	0	0	0	0	0
GNA13	0	0	0	0	0	0	0	0	0	0	0	0	0	0	0	0	0	0	0	0	0	0	1854.45	957.23	0	0	0	0	0	0	0	0	0	0	0	0	0	3616.5	2566.95	1317.35	0	1445.1	0	0	0	0	0	0	0
GNG5	0	0	0	0	0	0	0	0	0	0	0	0	0	0	0	0	0	0	0	0	0	0	4079.95	2026.2	0	0	0	0	0	0	0	0	0	0	0	0	0	0	0	0	0	0	0	0	0	0	0	0	0
GON7	0	0	0	0	0	0	0	0	0	0	0	0	0	0	0	0	0	0	0	0	0	0	2835.45	259.83	0	0	0	0	0	0	0	0	0	0	0	0	0	483.185	177.44	0	0	0	0	0	0	0	0	0	0
GPS1	0	0	0	0	0	0	0	0	0	0	0	0	0	0	0	0	0	0	0	0	0	0	1077.65	365.665	0	0	0	0	0	0	0	0	0	0	0	0	0	1970.85	514.335	0	0	0	0	0	0	0	0	0	0
GRB2	0	0	0	0	0	0	0	0	0	0	0	0	0	0	0	0	0	0	0	0	0	0	2196.8	2481.35	0	0	0	0	0	0	0	0	0	0	0	0	0	0	0	0	0	0	0	0	0	0	0	0	0
GRHPR	0	0	0	0	0	0	0	0	0	0	0	0	0	0	0	0	0	0	0	0	0	0	1155.47	3080	0	0	0	0	0	0	0	0	0	0	0	0	0	0	0	0	0	0	0	0	0	0	0	0	0
GYG1	0	0	0	0	0	0	0	0	0	0	0	0	0	0	0	0	0	0	0	0	0	0	3038.3	2367.1	0	0	0	0	0	0	0	0	0	0	1547.6	1318.95	0	0	0	0	0	0	4913.4	0	1668.55	0	0	0	0
HIKESHI	0	0	0	0	0	0	0	0	0	0	0	0	0	0	0	0	0	0	0	0	0	0	648.965	2626.45	0	0	0	0	0	0	0	0	0	0	0	0	0	0	0	0	0	0	0	0	0	0	0	0	0
HMGCS1	0	0	0	0	0	0	0	0	0	0	0	0	0	0	0	0	0	0	0	0	0	0	37180	49488	0	0	0	0	0	0	0	0	0	0	0	0	0	0	0	0	0	0	48576.5	0	31548	0	0	0	0
HNRNPK	0	0	0	0	0	0	0	0	0	0	0	0	0	0	0	0	0	0	0	0	0	0	6256.35	5501.3	0	0	0	0	0	0	0	0	0	0	6141.55	3631.65	0	0	0	0	0	0	0	0	0	0	0	0	0
HPDL	0	0	0	0	0	0	0	0	0	0	0	0	0	0	0	0	0	0	0	0	0	0	3063.9	3886.6	0	0	0	0	0	0	0	0	0	0	0	0	0	0	0	0	0	0	4659.4	0	2113.55	0	0	0	0
HSP90AA4P	0	0	0	0	0	0	0	0	0	0	0	0	0	0	0	0	0	0	0	0	0	0	6233.35	2425.5	0	0	0	0	0	0	0	0	0	0	1436.95	796.63	0	0	0	0	0	0	0	0	0	0	0	0	0
HSPH1	0	0	0	0	0	0	0	0	0	0	0	0	0	0	0	0	0	0	0	0	0	0	24872	18686	0	0	0	0	0	0	0	0	0	0	0	0	0	0	0	0	0	0	0	0	0	0	0	0	0
IARS2	0	0	0	0	0	0	0	0	0	0	0	0	0	0	0	0	0	0	0	0	0	0	4927.05	1829.75	0	0	0	0	0	0	0	0	0	0	0	0	0	0	0	0	0	0	3043	0	1563.75	0	0	0	0
IDH2	0	0	0	0	0	0	0	0	0	0	0	0	0	0	0	0	0	0	0	0	0	0	1070.67	838.655	0	0	0	0	0	0	0	0	0	0	0	0	0	990.47	509.205	314.965	0	1080.35	742.87	0	1064.53	0	0	0	0
IMPDH2	0	0	0	0	0	0	0	0	0	0	0	0	0	0	0	0	0	0	0	0	0	0	17072.5	10067.4	0	0	0	0	0	0	0	0	0	0	0	0	0	0	0	0	0	0	0	0	0	0	0	0	0
ITPA	0	0	0	0	0	0	0	0	0	0	0	0	0	0	0	0	0	0	0	0	0	0	1330.45	1346.84	0	0	0	0	0	0	0	0	0	0	0	0	0	0	0	0	0	0	0	0	0	0	0	0	0
JPT1	0	0	0	0	0	0	0	0	0	0	0	0	0	0	0	0	0	0	0	0	0	0	3120.95	2532.8	0	0	0	0	0	0	0	0	0	0	0	0	0	0	0	0	0	0	0	0	0	0	0	0	0
KLC1	0	0	0	0	0	0	0	0	0	0	0	0	0	0	0	0	0	0	0	0	0	0	2738.65	802.49	0	0	0	0	0	0	0	0	0	0	0	0	0	0	0	0	0	0	0	0	0	0	0	0	0
LONP1	0	0	0	0	0	0	0	0	0	0	0	0	0	0	0	0	0	0	0	0	0	0	927.56	668.43	0	0	0	0	0	0	0	0	0	0	0	0	0	0	0	0	0	0	0	0	0	0	0	0	0
LSM8	0	0	0	0	0	0	0	0	0	0	0	0	0	0	0	0	0	0	0	0	0	0	5407.3	3380.6	0	0	0	0	0	0	0	0	0	0	0	0	0	0	0	0	0	0	0	0	0	0	0	0	0
LYPLA2	0	0	0	0	0	0	0	0	0	0	0	0	0	0	0	0	0	0	0	0	0	0	1322.3	1071.65	0	0	0	0	0	0	0	0	0	0	0	0	0	0	0	0	0	0	0	0	0	0	0	0	0
MAGOHB	0	0	0	0	0	0	0	0	0	0	0	0	0	0	0	0	0	0	0	0	0	0	1111.65	673.18	0	0	0	0	0	0	0	0	0	0	0	0	0	1894.3	728.115	0	0	0	0	0	0	0	0	0	0
MAPK3	0	0	0	0	0	0	0	0	0	0	0	0	0	0	0	0	0	0	0	0	0	0	1954.1	846.65	0	0	0	0	0	0	0	0	0	0	0	0	0	0	0	0	0	0	0	0	0	0	0	0	0
MEAK7	0	0	0	0	0	0	0	0	0	0	0	0	0	0	0	0	0	0	0	0	0	0	3855.55	1361.85	0	0	0	0	0	0	0	0	0	0	0	0	0	2256.4	2489.3	0	0	0	0	0	0	0	0	0	0
MINDY1	0	0	0	0	0	0	0	0	0	0	0	0	0	0	0	0	0	0	0	0	0	0	4401.6	4983.2	0	0	0	0	0	0	0	0	0	0	0	0	0	0	0	9551.4	0	9968.35	7869.25	0	7928.75	0	0	0	0
MPZL1	0	0	0	0	0	0	0	0	0	0	0	0	0	0	0	0	0	0	0	0	0	0	428.195	515.23	0	0	0	0	0	0	0	0	0	0	0	0	0	0	0	0	0	0	0	0	0	0	0	0	0
MRE11	0	0	0	0	0	0	0	0	0	0	0	0	0	0	0	0	0	0	0	0	0	0	1142.4	641.45	0	0	0	0	0	0	0	0	0	0	1771.8	1456.25	0	1587.5	1490.65	0	0	0	0	0	0	0	0	0	0
MYG1	0	0	0	0	0	0	0	0	0	0	0	0	0	0	0	0	0	0	0	0	0	0	4323.3	2559.65	0	0	0	0	0	0	0	0	0	0	0	0	0	0	0	0	0	0	2487.5	0	1955.1	0	0	0	0
NAA25	0	0	0	0	0	0	0	0	0	0	0	0	0	0	0	0	0	0	0	0	0	0	928.66	370.445	0	0	0	0	0	0	0	0	0	0	0	0	0	0	0	0	0	0	0	0	0	0	0	0	0
NAE1	0	0	0	0	0	0	0	0	0	0	0	0	0	0	0	0	0	0	0	0	0	0	1253.9	2214.55	0	0	0	0	0	0	0	0	0	0	0	0	0	0	0	0	0	0	769.825	0	929.76	0	0	0	0
NANS	0	0	0	0	0	0	0	0	0	0	0	0	0	0	0	0	0	0	0	0	0	0	2442.4	2292.65	0	0	0	0	0	0	0	0	0	0	0	0	0	0	0	0	0	0	0	0	0	0	0	0	0
NAXE	0	0	0	0	0	0	0	0	0	0	0	0	0	0	0	0	0	0	0	0	0	0	5336.4	789.825	0	0	0	0	0	0	0	0	0	0	0	0	0	0	0	0	0	0	722.065	0	1526.4	0	0	0	0
NDRG1	0	0	0	0	0	0	0	0	0	0	0	0	0	0	0	0	0	0	0	0	0	0	840.61	1117.36	0	0	0	0	0	0	0	0	0	0	0	0	0	0	0	0	0	0	0	0	0	0	0	0	0
NDRG2	0	0	0	0	0	0	0	0	0	0	0	0	0	0	0	0	0	0	0	0	0	0	1812	909.04	0	0	0	0	0	0	0	0	0	0	0	0	0	0	0	0	0	0	0	0	0	0	0	0	0
NDRG3	0	0	0	0	0	0	0	0	0	0	0	0	0	0	0	0	0	0	0	0	0	0	6673.95	5829.65	0	0	0	0	0	0	0	0	0	0	0	0	0	823.08	1651.65	0	0	0	0	0	0	0	0	0	0
NDUFAB1	0	0	0	0	0	0	0	0	0	0	0	0	0	0	0	0	0	0	0	0	0	0	4977.15	2661.8	0	0	0	0	0	0	0	0	0	0	0	0	0	3754.6	4161.65	0	0	0	0	0	0	0	0	0	0
NIT2	0	0	0	0	0	0	0	0	0	0	0	0	0	0	0	0	0	0	0	0	0	0	5438.75	3815.35	0	0	0	0	0	0	0	0	0	0	0	0	0	2593.05	1383.1	0	0	0	0	0	0	0	0	0	0
NT5DC1	0	0	0	0	0	0	0	0	0	0	0	0	0	0	0	0	0	0	0	0	0	0	1541.28	1062.09	0	0	0	0	0	0	0	0	0	0	0	0	0	0	0	0	0	0	1339.35	0	419.98	0	0	0	0
NUCB1	0	0	0	0	0	0	0	0	0	0	0	0	0	0	0	0	0	0	0	0	0	0	2290	777.93	0	0	0	0	0	0	0	0	0	0	0	0	0	1453.52	385.545	0	0	0	0	0	0	0	0	0	0
NUCB2	0	0	0	0	0	0	0	0	0	0	0	0	0	0	0	0	0	0	0	0	0	0	1054.02	891.685	0	0	0	0	0	0	0	0	0	0	0	0	0	0	0	0	0	0	0	0	0	0	0	0	0
NUDT4	0	0	0	0	0	0	0	0	0	0	0	0	0	0	0	0	0	0	0	0	0	0	2659.95	1613.05	0	0	0	0	0	0	0	0	0	0	0	0	0	703.565	305.33	0	0	0	808.89	0	291.32	0	0	0	0
OXSR1	0	0	0	0	0	0	0	0	0	0	0	0	0	0	0	0	0	0	0	0	0	0	2717.2	1839.4	0	0	0	0	0	0	0	0	0	0	0	0	0	0	0	0	0	0	1997.45	0	317.459	0	0	0	0
PAFAH1B3	0	0	0	0	0	0	0	0	0	0	0	0	0	0	0	0	0	0	0	0	0	0	1436.85	401.36	0	0	0	0	0	0	0	0	0	0	0	0	0	0	0	0	0	0	0	0	0	0	0	0	0
PAPSS1	0	0	0	0	0	0	0	0	0	0	0	0	0	0	0	0	0	0	0	0	0	0	3280.9	602.995	0	0	0	0	0	0	0	0	0	0	0	0	0	817.51	583.105	0	0	0	867.635	0	501.065	0	0	0	0
PCK2	0	0	0	0	0	0	0	0	0	0	0	0	0	0	0	0	0	0	0	0	0	0	9812.55	6945.25	0	0	0	0	0	0	0	0	0	0	0	0	0	0	0	0	0	0	0	0	0	0	0	0	0
PCYT2	0	0	0	0	0	0	0	0	0	0	0	0	0	0	0	0	0	0	0	0	0	0	2835.1	1599.45	0	0	0	0	0	0	0	0	0	0	0	0	0	0	0	0	0	0	0	0	0	0	0	0	0
PDHA1	0	0	0	0	0	0	0	0	0	0	0	0	0	0	0	0	0	0	0	0	0	0	597.195	709.95	0	0	0	4412.7	0	2809.6	0	0	0	0	2201.55	2174.95	0	7240	12656.5	880.02	0	926.825	0	0	0	0	0	0	0
PFDN2	0	0	0	0	0	0	0	0	0	0	0	0	0	0	0	0	0	0	0	0	0	0	2623	2702.45	0	0	0	0	0	0	0	0	0	0	0	0	0	0	0	0	0	0	0	0	0	0	0	0	0
PFDN4	0	0	0	0	0	0	0	0	0	0	0	0	0	0	0	0	0	0	0	0	0	0	2014.35	2063.85	0	0	0	0	0	0	0	0	0	0	0	0	0	929.17	725.83	0	0	0	0	0	0	0	0	0	0
PFDN5	0	0	0	0	0	0	0	0	0	0	0	0	0	0	0	0	0	0	0	0	0	0	932.415	3408.7	0	0	0	0	0	0	0	0	0	0	0	0	0	0	0	0	0	0	0	0	0	0	0	0	0
PFDN6	0	0	0	0	0	0	0	0	0	0	0	0	0	0	0	0	0	0	0	0	0	0	1976.8	1986.4	0	0	0	0	0	0	0	0	0	0	0	0	0	775.905	1086.21	0	0	0	0	0	0	0	0	0	0
PFKM	0	0	0	0	0	0	0	0	0	0	0	0	0	0	0	0	0	0	0	0	0	0	14322.5	12826	0	0	0	0	0	0	0	0	0	0	0	0	0	0	0	0	0	0	0	0	0	0	0	0	0
PGLS	0	0	0	0	0	0	0	0	0	0	0	0	0	0	0	0	0	0	0	0	0	0	2601.75	1779.6	0	0	0	0	0	0	0	0	0	0	0	0	0	0	0	0	0	0	2185.95	0	1742.8	0	0	0	0
PGM2	0	0	0	0	0	0	0	0	0	0	0	0	0	0	0	0	0	0	0	0	0	0	886.28	709.965	0	0	0	0	0	0	0	0	0	0	0	0	0	0	0	0	0	0	0	0	0	0	0	0	0
PGM3	0	0	0	0	0	0	0	0	0	0	0	0	0	0	0	0	0	0	0	0	0	0	2030.3	1619.45	0	0	0	0	0	0	0	0	0	0	0	0	0	0	0	0	0	0	0	0	0	0	0	0	0
PGP	0	0	0	0	0	0	0	0	0	0	0	0	0	0	0	0	0	0	0	0	0	0	971.86	789.82	0	0	0	0	0	0	0	0	0	0	0	0	0	493.19	218.885	0	0	0	0	0	0	0	0	0	0
PGRMC2	0	0	0	0	0	0	0	0	0	0	0	0	0	0	0	0	0	0	0	0	0	0	9701.8	3211.25	0	0	0	14747.5	437.47	5179.9	0	0	0	0	9819.55	7223.35	0	7708.1	25516	0	0	0	0	0	0	0	0	0	0
PLIN2	0	0	0	0	0	0	0	0	0	0	0	0	0	0	0	0	0	0	0	0	0	0	3424.6	1866.5	0	0	0	0	0	0	0	0	0	0	0	0	0	0	0	0	0	0	888.845	0	680.49	0	0	0	0
POMP	0	0	0	0	0	0	0	0	0	0	0	0	0	0	0	0	0	0	0	0	0	0	718.905	637.99	0	0	0	0	0	0	0	0	0	0	0	0	0	0	0	0	0	0	0	0	0	0	0	0	0
PPAT	0	0	0	0	0	0	0	0	0	0	0	0	0	0	0	0	0	0	0	0	0	0	3309.75	1759.9	0	0	0	0	0	0	0	0	0	0	0	0	0	0	0	0	0	0	2451.8	0	749.905	0	0	0	0
PPP1R12A	0	0	0	0	0	0	0	0	0	0	0	0	0	0	0	0	0	0	0	0	0	0	4504.85	1579.95	0	0	0	0	0	0	0	0	0	0	0	0	0	0	0	0	0	0	2394.45	0	850.61	0	0	0	0
PPP1R7	0	0	0	0	0	0	0	0	0	0	0	0	0	0	0	0	0	0	0	0	0	0	2393.3	2005.3	0	0	0	0	0	0	0	0	0	0	0	0	0	0	0	0	0	0	0	0	0	0	0	0	0
PPP2R5D	0	0	0	0	0	0	0	0	0	0	0	0	0	0	0	0	0	0	0	0	0	0	2367.55	513.255	0	0	0	0	0	0	0	0	0	0	0	0	0	479.625	443.83	0	0	0	0	0	0	0	0	0	0
PRKCSH	0	0	0	0	0	0	0	0	0	0	0	0	0	0	0	0	0	0	0	0	0	0	21748.5	35933.5	0	0	0	0	0	0	0	0	0	0	0	0	0	0	0	0	0	0	0	0	0	0	0	0	0
PSAP	0	0	0	0	0	0	0	0	0	0	0	0	0	0	0	0	0	0	0	0	0	0	4903.9	3621.9	0	0	0	0	0	0	0	0	0	0	0	0	0	746.76	471.04	0	0	0	0	0	0	0	0	0	0
PSME2	0	0	0	0	0	0	0	0	0	0	0	0	0	0	0	0	0	0	0	0	0	0	16999.5	15594.5	0	0	0	0	0	0	0	0	0	0	0	0	0	0	0	0	0	0	0	0	0	0	0	0	0
PTGR1	0	0	0	0	0	0	0	0	0	0	0	0	0	0	0	0	0	0	0	0	0	0	21733.5	8443.85	0	0	0	0	0	0	0	0	0	0	0	0	0	0	0	0	0	0	20103.5	0	10105.5	0	0	0	0
PUS7	0	0	0	0	0	0	0	0	0	0	0	0	0	0	0	0	0	0	0	0	0	0	904.635	1596.45	0	0	0	0	0	0	0	0	0	0	0	0	0	1154.4	618.195	970.26	0	794.555	1390.43	0	1284.5	0	0	0	0
PXN	0	0	0	0	0	0	0	0	0	0	0	0	0	0	0	0	0	0	0	0	0	0	934.445	700.81	0	0	0	0	0	0	0	0	0	0	0	0	0	0	0	0	0	0	0	0	0	0	0	0	0
PYGB	0	0	0	0	0	0	0	0	0	0	0	0	0	0	0	0	0	0	0	0	0	0	1682.7	406.11	0	0	0	0	0	0	0	0	0	0	0	0	0	590.895	359.245	0	0	0	0	0	0	0	0	0	0
RANBP3	0	0	0	0	0	0	0	0	0	0	0	0	0	0	0	0	0	0	0	0	0	0	1704.4	2233.1	0	0	0	0	0	0	0	0	0	0	0	0	0	0	0	0	0	0	0	0	0	0	0	0	0
RBBP9	0	0	0	0	0	0	0	0	0	0	0	0	0	0	0	0	0	0	0	0	0	0	1367.7	307.48	0	0	0	0	0	0	0	0	0	0	0	0	0	0	0	0	0	0	0	0	0	0	0	0	0
RBM8A	0	0	0	0	0	0	0	0	0	0	0	0	0	0	0	0	0	0	0	0	0	0	567.58	1020.08	0	0	0	0	0	0	0	0	0	0	0	0	0	0	0	0	0	0	0	0	0	0	0	0	0
RIDA	0	0	0	0	0	0	0	0	0	0	0	0	0	0	0	0	0	0	0	0	0	0	6300.15	3117.4	0	0	0	0	0	0	0	0	0	0	0	0	0	0	0	0	0	0	2207.91	0	2393.55	0	0	0	0
RNF113A	0	0	0	0	0	0	0	0	0	0	0	0	0	0	0	0	0	0	0	0	0	0	715.71	349.075	0	0	0	0	0	0	0	0	0	0	0	0	0	0	0	0	0	0	0	0	0	0	0	0	0
RNF114	0	0	0	0	0	0	0	0	0	0	0	0	0	0	0	0	0	0	0	0	0	0	3381.25	4679	0	0	0	1564.1	1096.18	1596.3	0	0	0	0	0	0	0	0	0	0	0	0	2847.9	0	6359.5	0	0	0	0
RNF214	0	0	0	0	0	0	0	0	0	0	0	0	0	0	0	0	0	0	0	0	0	0	784.06	592.53	0	0	0	0	0	0	0	0	0	0	0	0	0	0	0	0	0	0	0	0	0	0	0	0	0
RPIA	0	0	0	0	0	0	0	0	0	0	0	0	0	0	0	0	0	0	0	0	0	0	2185.75	1400.6	0	0	0	0	0	0	0	0	0	0	0	0	0	0	0	0	0	0	0	0	0	0	0	0	0
RTKN	0	0	0	0	0	0	0	0	0	0	0	0	0	0	0	0	0	0	0	0	0	0	2336.95	1481.9	0	0	0	0	0	0	0	0	0	0	0	0	0	0	0	1322.2	919.37	459.25	0	0	0	0	0	0	0
S100A14	0	0	0	0	0	0	0	0	0	0	0	0	0	0	0	0	0	0	0	0	0	0	235.73	1317.47	0	0	0	11641.5	0	4298	0	0	0	0	0	0	0	1961.4	570.75	0	0	0	0	0	0	0	0	0	0
S100P	0	0	0	0	0	0	0	0	0	0	0	0	0	0	0	0	0	0	0	0	0	0	1454.85	487.22	0	0	0	0	0	0	0	0	0	0	0	0	0	0	0	0	0	0	0	0	0	0	0	0	0
SCRN1	0	0	0	0	0	0	0	0	0	0	0	0	0	0	0	0	0	0	0	0	0	0	4354.95	2828.65	0	0	0	0	0	0	0	0	0	0	0	0	0	794.295	516.96	0	0	0	2713.7	0	1238.92	0	0	0	0
SCYL2	0	0	0	0	0	0	0	0	0	0	0	0	0	0	0	0	0	0	0	0	0	0	778.64	372.095	0	0	0	0	0	0	0	0	0	0	0	0	0	1300.19	735.12	0	0	0	0	0	0	0	0	0	0
SHTN1	0	0	0	0	0	0	0	0	0	0	0	0	0	0	0	0	0	0	0	0	0	0	2249.7	1100.65	0	0	0	0	0	0	0	0	0	0	0	0	0	0	0	0	0	0	0	0	0	0	0	0	0
SOD2	0	0	0	0	0	0	0	0	0	0	0	0	0	0	0	0	0	0	0	0	0	0	3790.85	3336.8	0	0	0	0	0	0	0	0	0	0	0	0	0	0	0	0	0	0	2109.1	0	1406.05	0	0	0	0
SPAG9	0	0	0	0	0	0	0	0	0	0	0	0	0	0	0	0	0	0	0	0	0	0	1330.2	508.995	0	0	0	0	0	0	0	0	0	0	0	0	0	0	0	0	0	0	540.875	0	584.105	0	0	0	0
STRAP	0	0	0	0	0	0	0	0	0	0	0	0	0	0	0	0	0	0	0	0	0	0	15747.5	15339	0	0	0	0	0	0	0	0	0	0	0	0	0	0	0	0	0	0	0	0	0	0	0	0	0
SUCLG2	0	0	0	0	0	0	0	0	0	0	0	0	0	0	0	0	0	0	0	0	0	0	6176.45	1995.75	0	0	0	0	0	0	0	0	0	0	0	0	0	1411.45	1975.5	0	0	0	1455.3	0	3109.75	0	0	0	0
TIAL1	0	0	0	0	0	0	0	0	0	0	0	0	0	0	0	0	0	0	0	0	0	0	8028	5162.55	0	0	0	7748.05	6958	6307.95	0	0	0	0	0	0	0	0	0	0	0	0	0	0	0	2771.3	3182.1	18291	0
TIGAR	0	0	0	0	0	0	0	0	0	0	0	0	0	0	0	0	0	0	0	0	0	0	3326.75	2561.6	0	0	0	0	0	0	0	0	0	0	0	0	0	0	0	0	0	0	1731.6	0	1703.65	0	0	0	0
TIPRL	0	0	0	0	0	0	0	0	0	0	0	0	0	0	0	0	0	0	0	0	0	0	1325.8	1456.9	0	0	0	0	0	0	0	0	0	0	0	0	0	0	0	0	0	0	0	0	0	0	0	0	0
TKFC	0	0	0	0	0	0	0	0	0	0	0	0	0	0	0	0	0	0	0	0	0	0	4340.35	1556.85	0	0	0	0	0	0	0	0	0	0	0	0	0	0	0	0	0	0	0	0	0	0	0	0	0
TP53I3	0	0	0	0	0	0	0	0	0	0	0	0	0	0	0	0	0	0	0	0	0	0	3032.45	828.22	0	0	0	0	0	0	0	0	0	0	0	0	0	0	0	0	0	0	0	0	0	0	0	0	0
TPD52	0	0	0	0	0	0	0	0	0	0	0	0	0	0	0	0	0	0	0	0	0	0	2663.55	1116.7	0	0	0	0	0	0	0	0	0	0	0	0	0	0	0	0	0	0	0	0	0	0	0	0	0
TRNT1	0	0	0	0	0	0	0	0	0	0	0	0	0	0	0	0	0	0	0	0	0	0	2049.05	634.53	0	0	0	0	0	0	0	0	0	0	0	0	0	944.725	557.2	0	0	0	0	0	0	0	0	0	0
TSFM	0	0	0	0	0	0	0	0	0	0	0	0	0	0	0	0	0	0	0	0	0	0	1116.6	967.24	0	0	0	0	0	0	0	0	0	0	0	0	0	0	0	0	0	0	0	0	0	0	0	0	0
TSNAX	0	0	0	0	0	0	0	0	0	0	0	0	0	0	0	0	0	0	0	0	0	0	3322.45	1788	0	0	0	0	0	0	0	0	0	0	0	0	0	0	0	0	0	0	963.78	0	594.565	0	0	0	0
TYMS	0	0	0	0	0	0	0	0	0	0	0	0	0	0	0	0	0	0	0	0	0	0	2280.95	1561.7	0	0	0	0	0	0	0	0	0	0	0	0	0	0	0	0	0	0	0	0	0	0	0	0	0
UBA6	0	0	0	0	0	0	0	0	0	0	0	0	0	0	0	0	0	0	0	0	0	0	2073.6	722	0	0	0	0	0	0	0	0	0	0	0	0	0	0	0	0	0	0	0	0	0	0	0	0	0
UBE2K	0	0	0	0	0	0	0	0	0	0	0	0	0	0	0	0	0	0	0	0	0	0	3343.6	3811.2	0	0	0	0	0	0	0	0	0	0	0	0	0	0	0	0	0	0	3647.65	0	2216.35	0	0	0	0
UBE2V2	0	0	0	0	0	0	0	0	0	0	0	0	0	0	0	0	0	0	0	0	0	0	884.195	1232.79	0	0	0	0	0	0	0	0	0	0	0	0	0	0	0	0	0	0	0	0	0	0	0	0	0
UBE4A	0	0	0	0	0	0	0	0	0	0	0	0	0	0	0	0	0	0	0	0	0	0	3371.75	2865.75	0	0	0	2231.4	0	1064.95	0	0	0	0	0	0	0	1475.4	2275.2	4887.05	0	1124.24	2055.15	0	1559.1	0	0	0	0
UBFD1	0	0	0	0	0	0	0	0	0	0	0	0	0	0	0	0	0	0	0	0	0	0	3592.9	4617.8	0	0	0	0	0	0	0	0	0	0	0	0	0	0	0	0	0	0	0	0	0	0	0	0	0
UGGT1	0	0	0	0	0	0	0	0	0	0	0	0	0	0	0	0	0	0	0	0	0	0	5876.7	3283.5	0	0	0	0	0	0	0	0	0	0	0	0	0	512.575	352.155	0	0	0	2075	0	569.02	0	0	0	0
VBP1	0	0	0	0	0	0	0	0	0	0	0	0	0	0	0	0	0	0	0	0	0	0	2130.8	3090.8	0	0	0	0	0	0	0	0	0	0	0	0	0	0	0	0	0	0	0	0	0	0	0	0	0
VPS37B	0	0	0	0	0	0	0	0	0	0	0	0	0	0	0	0	0	0	0	0	0	0	1092.14	521.86	0	0	0	0	0	0	0	0	0	0	0	0	0	0	0	0	0	0	0	0	0	0	0	0	0
WDR55	0	0	0	0	0	0	0	0	0	0	0	0	0	0	0	0	0	0	0	0	0	0	1283.5	441.56	0	0	0	0	0	0	0	0	0	0	3387.91	740.37	0	0	0	0	0	0	0	0	0	0	0	0	0
ZBTB8OS	0	0	0	0	0	0	0	0	0	0	0	0	0	0	0	0	0	0	0	0	0	0	868.3	950.225	0	0	0	0	0	0	0	0	0	0	0	0	0	0	0	0	0	0	0	0	0	0	0	0	0
ZPR1	0	0	0	0	0	0	0	0	0	0	0	0	0	0	0	0	0	0	0	0	0	0	1371	982.985	0	0	0	0	0	0	0	0	0	0	0	0	0	0	0	0	0	0	0	0	0	0	0	0	0
ABCB1	0	0	0	0	0	0	0	0	0	0	0	0	0	0	0	0	0	0	0	0	0	0	0	0	931.92	160.97	0	611.5	0	276.925	0	0	0	0	0	0	0	0	0	0	0	0	0	0	0	0	0	0	0
ATP5F1D	0	0	0	0	0	0	0	0	0	0	0	0	0	0	0	0	0	0	0	0	0	0	0	0	2230.2	722.725	265.14	72962	4353.75	36758.5	0	0	0	0	0	0	0	3375.35	5508.75	0	0	0	0	0	0	0	0	0	0
ATP6V0D1	0	0	0	0	0	0	0	0	0	0	0	0	0	0	0	0	0	0	0	0	0	0	0	0	939.91	296.408	0	2157.75	0	147.8	0	0	0	0	0	0	0	0	0	0	0	0	0	0	0	0	0	0	0
CIAO2B	0	0	0	0	0	0	0	0	0	0	0	0	0	0	0	0	0	0	0	0	0	0	0	0	4880	5103.45	3825.1	0	0	0	0	0	0	0	0	0	0	0	0	0	0	0	0	0	0	0	0	0	0
DIABLO	0	0	0	0	0	0	0	0	0	0	0	0	0	0	0	0	0	0	0	0	0	0	0	0	564450	502555	372440	0	0	0	0	0	0	0	0	0	0	0	0	0	0	0	0	0	0	0	0	0	258795
DNAJA2	0	0	0	0	0	0	0	0	0	0	0	0	0	0	0	0	0	0	0	0	0	0	0	0	17657.5	14424	12915.5	0	0	0	0	0	0	0	0	0	22227.5	11787.5	14824	0	0	0	0	0	0	0	0	0	0
DNAJC1	0	0	0	0	0	0	0	0	0	0	0	0	0	0	0	0	0	0	0	0	0	0	0	0	2885.75	826.2	0	0	0	0	0	0	0	0	0	0	0	1203.49	1416.5	0	0	0	0	0	0	0	0	0	0
GPR89A	0	0	0	0	0	0	0	0	0	0	0	0	0	0	0	0	0	0	0	0	0	0	0	0	676.07	180.41	0	618.4	0	184.48	0	0	0	0	0	0	0	0	0	0	0	0	0	0	0	0	0	0	0
HNRNPH1	0	0	0	0	0	0	0	0	0	0	0	0	0	0	0	0	0	0	0	0	0	0	0	0	154035	170855	186875	205985	164415	199945	0	0	0	0	0	0	0	0	0	0	0	0	0	0	0	0	0	0	0
LSM2	0	0	0	0	0	0	0	0	0	0	0	0	0	0	0	0	0	0	0	0	0	0	0	0	8010.95	8153	10363.6	8634	13306.5	10418	0	0	0	0	0	0	0	0	0	0	0	0	0	0	0	0	0	0	0
MKI67	0	0	0	0	0	0	0	0	0	0	0	0	0	0	0	0	0	0	0	0	0	0	0	0	169.2	741.33	7609.4	179520	150.15	45675	0	0	0	0	1050.37	602.54	0	2366.3	2213.3	0	0	0	0	0	0	0	0	0	0
MTHFD1L	0	0	0	0	0	0	0	0	0	0	0	0	0	0	0	0	0	0	0	0	0	0	0	0	276.17	731.51	2265.5	0	5800.05	3747.9	0	0	0	0	2333.55	1042.02	0	1676.2	2882.8	0	0	0	0	0	0	0	0	0	0
NUMA1	0	0	0	0	0	0	0	0	0	0	0	0	0	0	0	0	0	0	0	0	0	0	0	0	598.87	1155.82	1594.95	34747.5	1044.62	10389	0	0	0	175.18	206.4	723.935	0	0	0	0	0	0	0	0	0	0	0	0	0
PDXDC1	0	0	0	0	0	0	0	0	0	0	0	0	0	0	0	0	0	0	0	0	0	0	0	0	14346.5	28753.5	43051	0	0	0	0	0	0	0	0	0	0	0	0	0	0	0	0	0	0	0	0	0	0
PRPF8	0	0	0	0	0	0	0	0	0	0	0	0	0	0	0	0	0	0	0	0	0	0	0	0	107890	79528	59047	0	0	0	0	0	0	0	0	0	0	0	0	0	0	0	0	0	0	39926	184545	96147	0
RPLP2	0	0	0	0	0	0	0	0	0	0	0	0	0	0	0	0	0	0	0	0	0	0	0	0	127530	94027.5	47454	116325	46687	83144.5	0	0	0	0	0	0	0	0	0	0	0	0	0	0	0	0	0	0	0
SLC35B2	0	0	0	0	0	0	0	0	0	0	0	0	0	0	0	0	0	0	0	0	0	0	0	0	1952.85	1449.15	0	0	0	0	3619.6	2978.4	4417.45	0	0	0	0	0	0	0	0	0	0	0	0	0	0	0	5954.8
TCAF1	0	0	0	0	0	0	0	0	0	0	0	0	0	0	0	0	0	0	0	0	0	0	0	0	1923.65	2493	2168.4	1518.8	1693.2	2031.95	0	0	0	0	0	0	0	0	0	0	0	0	0	0	0	0	0	0	0
TMBIM1	0	0	0	0	0	0	0	0	0	0	0	0	0	0	0	0	0	0	0	0	0	0	0	0	883.975	359.985	0	3401.7	0	961.47	0	0	0	0	0	0	0	0	0	0	0	0	0	0	0	0	0	0	0
TMED4	0	0	0	0	0	0	0	0	0	0	0	0	0	0	0	0	0	0	0	0	0	0	0	0	1096.37	328.865	0	1293.7	0	387.715	0	0	0	0	0	0	0	0	0	0	0	0	0	0	0	0	0	0	0
TXNL4A	0	0	0	0	0	0	0	0	0	0	0	0	0	0	0	0	0	0	0	0	0	0	0	0	4541.3	4425.3	3513.65	8075.95	6036.7	6843.6	0	0	0	0	0	0	0	0	0	0	0	0	0	0	0	5141.1	0	4816.05	0
U2SURP	0	0	0	0	0	0	0	0	0	0	0	0	0	0	0	0	0	0	0	0	0	0	0	0	21679.5	21396.5	20165.5	0	0	0	0	0	0	0	0	0	0	0	0	0	0	0	0	0	0	0	0	0	0
CDC27	0	0	0	0	0	0	0	0	0	0	0	0	0	0	0	0	0	0	0	0	0	0	0	0	0	1398.9	2722.55	1875.85	0	1818.7	0	0	0	0	0	0	0	0	0	0	0	0	0	0	0	0	0	0	0
RBFOX2	0	0	0	0	0	0	0	0	0	0	0	0	0	0	0	0	0	0	0	0	0	0	0	0	0	671.075	946.755	1053.7	750.89	1575.9	0	0	0	0	0	0	0	0	0	0	0	0	0	0	0	0	0	0	0
AP2A1	0	0	0	0	0	0	0	0	0	0	0	0	0	0	0	0	0	0	0	0	0	0	0	0	0	0	0	6096.65	14187	10687.5	0	0	0	0	0	0	0	0	0	0	0	0	0	0	0	0	0	0	0
ATP5F1A	0	0	0	0	0	0	0	0	0	0	0	0	0	0	0	0	0	0	0	0	0	0	0	0	0	0	0	140025	6291.95	73821	0	0	0	0	45622.5	49505.5	0	0	0	0	0	0	0	0	0	0	0	0	0
ATP5PF	0	0	0	0	0	0	0	0	0	0	0	0	0	0	0	0	0	0	0	0	0	0	0	0	0	0	0	5048.85	0	1108.25	0	0	0	0	0	0	0	0	0	0	0	0	0	0	0	0	0	0	0
BAG2	0	0	0	0	0	0	0	0	0	0	0	0	0	0	0	0	0	0	0	0	0	0	0	0	0	0	0	770.73	527.38	707.025	0	0	0	0	0	0	0	2185.25	840.36	0	0	0	0	0	0	0	0	0	0
BAG3	0	0	0	0	0	0	0	0	0	0	0	0	0	0	0	0	0	0	0	0	0	0	0	0	0	0	0	3979.5	0	1442.1	0	0	0	0	0	0	0	0	0	0	0	0	0	0	0	0	0	0	0
C1orf174	0	0	0	0	0	0	0	0	0	0	0	0	0	0	0	0	0	0	0	0	0	0	0	0	0	0	0	3148.15	0	1205.9	0	0	0	0	0	0	0	0	0	0	0	0	0	0	0	0	0	0	0
CANX	0	0	0	0	0	0	0	0	0	0	0	0	0	0	0	0	0	0	0	0	0	0	0	0	0	0	0	54638.5	19033.5	38033	0	0	0	0	0	0	0	0	0	0	0	0	0	0	0	0	0	0	0
CDC26	0	0	0	0	0	0	0	0	0	0	0	0	0	0	0	0	0	0	0	0	0	0	0	0	0	0	0	6452.3	0	3569.65	0	0	0	0	0	0	0	0	0	0	0	0	0	0	0	0	0	0	0
CDK2	0	0	0	0	0	0	0	0	0	0	0	0	0	0	0	0	0	0	0	0	0	0	0	0	0	0	0	1410.5	1548.85	1369.35	0	0	0	0	1593.15	1436	0	624.395	1543.4	0	0	0	0	0	0	0	0	0	0
CDV3	0	0	0	0	0	0	0	0	0	0	0	0	0	0	0	0	0	0	0	0	0	0	0	0	0	0	0	30846.5	49329	42646.5	0	0	0	0	0	0	0	0	0	0	0	0	0	0	0	0	0	0	0
CISD1	0	0	0	0	0	0	0	0	0	0	0	0	0	0	0	0	0	0	0	0	0	0	0	0	0	0	0	4925.4	0	1641.45	0	0	0	0	0	0	0	3189.45	1047.79	0	0	0	0	0	0	0	0	0	0
CKAP2	0	0	0	0	0	0	0	0	0	0	0	0	0	0	0	0	0	0	0	0	0	0	0	0	0	0	0	1585	0	517.81	0	0	0	0	0	0	0	0	0	0	0	0	0	0	0	0	0	0	0
CLASP2	0	0	0	0	0	0	0	0	0	0	0	0	0	0	0	0	0	0	0	0	0	0	0	0	0	0	0	1617.15	0	917.625	0	0	0	0	0	0	0	0	0	0	0	0	0	0	0	0	0	0	0
COX20	0	0	0	0	0	0	0	0	0	0	0	0	0	0	0	0	0	0	0	0	0	0	0	0	0	0	0	2412.75	0	389.455	0	0	0	0	0	0	0	3136.95	2682.15	0	0	0	0	0	0	0	0	0	0
CTBP1	0	0	0	0	0	0	0	0	0	0	0	0	0	0	0	0	0	0	0	0	0	0	0	0	0	0	0	1853.8	850.27	1213.38	0	0	0	0	0	0	0	0	0	0	0	0	0	0	0	0	0	0	0
CTBP2	0	0	0	0	0	0	0	0	0	0	0	0	0	0	0	0	0	0	0	0	0	0	0	0	0	0	0	1013.7	1007.7	1104.76	0	0	0	0	0	0	0	0	0	0	0	0	0	0	0	0	0	0	0
DBT	0	0	0	0	0	0	0	0	0	0	0	0	0	0	0	0	0	0	0	0	0	0	0	0	0	0	0	2565.65	0	254.105	0	0	0	0	0	0	0	3589.4	1183.3	0	0	0	0	0	0	0	0	0	0
DNTTIP2	0	0	0	0	0	0	0	0	0	0	0	0	0	0	0	0	0	0	0	0	0	0	0	0	0	0	0	6792.8	0	1208.03	0	0	0	0	0	0	0	0	0	0	0	0	0	0	0	0	0	0	0
DPM1	0	0	0	0	0	0	0	0	0	0	0	0	0	0	0	0	0	0	0	0	0	0	0	0	0	0	0	1524.4	0	975.915	0	0	0	0	0	0	0	0	0	0	0	0	0	0	0	0	0	0	0
DPY30	0	0	0	0	0	0	0	0	0	0	0	0	0	0	0	0	0	0	0	0	0	0	0	0	0	0	0	1798.6	0	474.965	0	0	0	0	0	0	0	1661.45	964.405	0	0	0	0	0	0	0	0	0	0
DSG2	0	0	0	0	0	0	0	0	0	0	0	0	0	0	0	0	0	0	0	0	0	0	0	0	0	0	0	3915.3	0	1026.65	0	0	0	0	0	0	0	0	0	0	0	0	0	0	0	0	0	0	0
EMC1	0	0	0	0	0	0	0	0	0	0	0	0	0	0	0	0	0	0	0	0	0	0	0	0	0	0	0	802.465	0	426.755	0	0	0	0	0	0	0	0	0	0	0	0	0	0	0	0	0	0	0
ERLIN2	0	0	0	0	0	0	0	0	0	0	0	0	0	0	0	0	0	0	0	0	0	0	0	0	0	0	0	2987.2	0	832.545	0	0	0	0	0	0	0	0	0	0	0	0	0	0	0	0	0	0	0
FAM107B	0	0	0	0	0	0	0	0	0	0	0	0	0	0	0	0	0	0	0	0	0	0	0	0	0	0	0	5027.4	0	2524.15	0	0	0	0	0	0	0	0	0	0	0	0	0	0	0	0	0	0	0
FAR1	0	0	0	0	0	0	0	0	0	0	0	0	0	0	0	0	0	0	0	0	0	0	0	0	0	0	0	2572.5	0	2430.25	0	0	0	0	0	0	0	0	0	0	0	0	0	0	0	0	0	0	0
GGCX	0	0	0	0	0	0	0	0	0	0	0	0	0	0	0	0	0	0	0	0	0	0	0	0	0	0	0	2582.85	0	908.915	0	0	0	0	0	0	0	0	0	0	0	0	0	0	0	0	0	0	0
GPRC5A	0	0	0	0	0	0	0	0	0	0	0	0	0	0	0	0	0	0	0	0	0	0	0	0	0	0	0	796.915	0	401.135	0	0	0	0	0	0	0	0	0	0	0	0	0	0	0	0	0	0	0
GTSE1	0	0	0	0	0	0	0	0	0	0	0	0	0	0	0	0	0	0	0	0	0	0	0	0	0	0	0	3262.8	1424.15	2377.65	0	0	0	0	0	0	0	0	0	0	0	0	0	0	0	0	0	0	0
HMGA1	0	0	0	0	0	0	0	0	0	0	0	0	0	0	0	0	0	0	0	0	0	0	0	0	0	0	0	42934.5	0	10641.5	0	0	0	0	0	0	0	0	0	0	0	0	0	0	0	0	7091.5	1380.55	0
HMGA2	0	0	0	0	0	0	0	0	0	0	0	0	0	0	0	0	0	0	0	0	0	0	0	0	0	0	0	3444.15	0	972.355	0	0	0	0	0	0	0	0	0	0	0	0	0	0	0	0	0	0	0
HMGN1	0	0	0	0	0	0	0	0	0	0	0	0	0	0	0	0	0	0	0	0	0	0	0	0	0	0	0	62586.5	0	23290.5	0	0	0	0	0	0	0	0	0	0	0	0	0	0	0	0	0	0	0
HMGN2	0	0	0	0	0	0	0	0	0	0	0	0	0	0	0	0	0	0	0	0	0	0	0	0	0	0	0	184500	3016.4	78040	0	0	0	0	0	0	0	0	0	0	0	0	0	0	0	0	0	0	0
HMGN3	0	0	0	0	0	0	0	0	0	0	0	0	0	0	0	0	0	0	0	0	0	0	0	0	0	0	0	25745.5	0	9192.8	0	0	0	0	0	0	0	0	0	0	0	0	0	0	0	0	0	0	0
HMGN4	0	0	0	0	0	0	0	0	0	0	0	0	0	0	0	0	0	0	0	0	0	0	0	0	0	0	0	4407.45	0	1823.85	0	0	0	0	0	0	0	0	0	0	0	0	0	0	0	0	0	0	0
HNRNPA3	0	0	0	0	0	0	0	0	0	0	0	0	0	0	0	0	0	0	0	0	0	0	0	0	0	0	0	30879.5	24141.5	29571.5	0	0	0	0	0	0	0	0	0	0	0	0	0	0	0	0	0	0	0
IKBIP	0	0	0	0	0	0	0	0	0	0	0	0	0	0	0	0	0	0	0	0	0	0	0	0	0	0	0	1139.85	0	671.955	0	0	0	0	0	0	0	0	0	0	0	0	0	0	0	0	0	0	0
KRTCAP2	0	0	0	0	0	0	0	0	0	0	0	0	0	0	0	0	0	0	0	0	0	0	0	0	0	0	0	6280.7	0	2483.15	0	0	0	0	653.125	613.715	0	0	0	0	0	0	0	0	0	0	0	0	0
LAMTOR3	0	0	0	0	0	0	0	0	0	0	0	0	0	0	0	0	0	0	0	0	0	0	0	0	0	0	0	3357.75	0	1119.6	0	0	0	0	0	0	0	6870.65	5108.5	0	0	0	0	0	0	0	0	0	0
MAVS	0	0	0	0	0	0	0	0	0	0	0	0	0	0	0	0	0	0	0	0	0	0	0	0	0	0	0	2558.85	0	932.78	0	0	0	0	0	0	0	0	0	0	0	0	0	0	0	0	0	0	0
MBNL1	0	0	0	0	0	0	0	0	0	0	0	0	0	0	0	0	0	0	0	0	0	0	0	0	0	0	0	128.44	176.44	195.19	0	0	0	0	0	0	0	0	0	0	0	0	0	0	0	0	0	0	0
MESD	0	0	0	0	0	0	0	0	0	0	0	0	0	0	0	0	0	0	0	0	0	0	0	0	0	0	0	5425.15	0	1547.95	0	0	0	0	0	0	0	0	0	0	0	0	0	0	0	0	0	0	0
MGMT	0	0	0	0	0	0	0	0	0	0	0	0	0	0	0	0	0	0	0	0	0	0	0	0	0	0	0	17057	0	8517.95	0	0	0	0	812.19	164.69	0	586.3	457.025	0	0	0	0	0	0	0	0	0	0
MLEC	0	0	0	0	0	0	0	0	0	0	0	0	0	0	0	0	0	0	0	0	0	0	0	0	0	0	0	3203.2	0	879.765	0	0	0	0	1631.79	506.075	0	2620.67	748.675	0	0	0	0	0	0	0	0	0	0
MMAB	0	0	0	0	0	0	0	0	0	0	0	0	0	0	0	0	0	0	0	0	0	0	0	0	0	0	0	5424.25	0	1005.99	0	0	0	0	0	0	0	0	0	0	0	0	0	0	0	0	0	0	0
MORF4L2	0	0	0	0	0	0	0	0	0	0	0	0	0	0	0	0	0	0	0	0	0	0	0	0	0	0	0	1405.55	0	652.035	0	0	0	0	0	0	0	0	0	0	0	0	0	0	0	0	0	0	0
MRPL1	0	0	0	0	0	0	0	0	0	0	0	0	0	0	0	0	0	0	0	0	0	0	0	0	0	0	0	6792.4	520.415	999.345	0	0	0	0	0	0	0	3876.65	1319.2	0	0	0	0	0	0	0	0	0	0
MRPL15	0	0	0	0	0	0	0	0	0	0	0	0	0	0	0	0	0	0	0	0	0	0	0	0	0	0	0	1675.1	389.76	901.93	0	0	0	0	0	0	0	4951.25	3460.15	0	0	0	0	0	0	0	0	0	0
MRPL46	0	0	0	0	0	0	0	0	0	0	0	0	0	0	0	0	0	0	0	0	0	0	0	0	0	0	0	11898	0	3584.05	0	0	0	0	0	0	0	3081.8	1155.7	0	0	0	0	0	0	0	0	0	0
MRPL47	0	0	0	0	0	0	0	0	0	0	0	0	0	0	0	0	0	0	0	0	0	0	0	0	0	0	0	1290.9	0	970.615	0	0	0	0	0	0	0	6333.15	1059.35	0	0	0	0	0	0	0	0	0	0
MRPL51	0	0	0	0	0	0	0	0	0	0	0	0	0	0	0	0	0	0	0	0	0	0	0	0	0	0	0	1486.8	0	620.08	0	0	0	0	0	0	0	0	0	0	0	0	0	0	0	0	0	0	0
MRPS23	0	0	0	0	0	0	0	0	0	0	0	0	0	0	0	0	0	0	0	0	0	0	0	0	0	0	0	943.405	854.31	1227.9	0	0	0	0	0	0	0	0	0	0	0	0	0	0	0	0	0	0	0
MRPS28	0	0	0	0	0	0	0	0	0	0	0	0	0	0	0	0	0	0	0	0	0	0	0	0	0	0	0	5536.6	850.67	1581.05	0	0	0	0	0	0	0	0	0	0	0	0	0	0	0	0	6176.1	2270.35	0
MT-ATP6	0	0	0	0	0	0	0	0	0	0	0	0	0	0	0	0	0	0	0	0	0	0	0	0	0	0	0	15680	0	9396.3	0	0	0	0	0	0	0	0	0	8438.75	0	7560.5	2956.5	0	2375	0	0	0	0
MTCH1	0	0	0	0	0	0	0	0	0	0	0	0	0	0	0	0	0	0	0	0	0	0	0	0	0	0	0	12576	0	3795.45	0	0	0	0	0	0	0	0	0	0	0	0	0	0	0	0	0	0	0
MYOF	0	0	0	0	0	0	0	0	0	0	0	0	0	0	0	0	0	0	0	0	0	0	0	0	0	0	0	3063.8	493.86	1751.05	0	0	0	0	1169.15	810.075	0	2784.8	596.285	0	0	0	0	0	0	0	0	0	0
NDUFA4	0	0	0	0	0	0	0	0	0	0	0	0	0	0	0	0	0	0	0	0	0	0	0	0	0	0	0	7686.35	0	1436.4	0	0	0	0	1064.95	2384.4	0	0	0	0	0	0	0	0	0	0	0	0	0
NDUFA7	0	0	0	0	0	0	0	0	0	0	0	0	0	0	0	0	0	0	0	0	0	0	0	0	0	0	0	2425.95	0	772.82	0	0	0	0	0	0	0	5096.05	2419.2	0	0	0	0	0	0	0	0	0	0
NDUFAF3	0	0	0	0	0	0	0	0	0	0	0	0	0	0	0	0	0	0	0	0	0	0	0	0	0	0	0	4341.75	0	1653.25	0	0	0	0	0	0	0	0	0	0	0	0	0	0	0	0	0	0	0
NDUFAF4	0	0	0	0	0	0	0	0	0	0	0	0	0	0	0	0	0	0	0	0	0	0	0	0	0	0	0	857.8	0	393.85	0	0	0	0	0	0	0	924.65	573.005	0	0	0	0	0	0	0	0	0	0
NDUFS2	0	0	0	0	0	0	0	0	0	0	0	0	0	0	0	0	0	0	0	0	0	0	0	0	0	0	0	2640.4	0	1750.85	0	0	0	0	0	0	0	0	0	0	0	0	0	0	0	0	0	0	0
NDUFV2	0	0	0	0	0	0	0	0	0	0	0	0	0	0	0	0	0	0	0	0	0	0	0	0	0	0	0	26693	0	5306	0	0	0	0	0	0	0	4409.3	2197.25	0	0	0	0	0	0	0	0	0	0
NHEJ1	0	0	0	0	0	0	0	0	0	0	0	0	0	0	0	0	0	0	0	0	0	0	0	0	0	0	0	3720.2	0	999.685	0	0	0	0	0	0	0	0	0	0	0	0	0	0	0	0	0	0	0
NUP153	0	0	0	0	0	0	0	0	0	0	0	0	0	0	0	0	0	0	0	0	0	0	0	0	0	0	0	9790.8	416.14	2975.25	0	0	0	0	0	0	0	0	0	0	0	0	0	0	0	0	0	0	0
NUP35	0	0	0	0	0	0	0	0	0	0	0	0	0	0	0	0	0	0	0	0	0	0	0	0	0	0	0	43999	403.24	12216	0	0	0	0	444.605	393.105	0	97.22	172.828	0	0	0	0	0	0	0	1234.39	984.315	0
NUP50	0	0	0	0	0	0	0	0	0	0	0	0	0	0	0	0	0	0	0	0	0	0	0	0	0	0	0	4529.7	0	838.065	0	0	0	0	0	0	0	494.84	279.705	0	0	0	0	0	0	0	0	0	0
NUP62	0	0	0	0	0	0	0	0	0	0	0	0	0	0	0	0	0	0	0	0	0	0	0	0	0	0	0	2526.6	0	1325.45	0	0	0	0	0	0	0	0	0	0	0	0	0	0	0	0	0	0	0
PARVA	0	0	0	0	0	0	0	0	0	0	0	0	0	0	0	0	0	0	0	0	0	0	0	0	0	0	0	1748.85	0	875.105	0	0	0	0	0	0	0	0	0	0	0	0	0	0	0	0	0	0	0
PAXX	0	0	0	0	0	0	0	0	0	0	0	0	0	0	0	0	0	0	0	0	0	0	0	0	0	0	0	9421.05	0	5621.9	0	0	0	0	0	0	0	0	0	0	0	0	0	0	0	0	0	0	0
PCBP1	0	0	0	0	0	0	0	0	0	0	0	0	0	0	0	0	0	0	0	0	0	0	0	0	0	0	0	105605	28058	64782	0	0	0	0	0	0	0	0	0	0	0	0	0	0	0	0	0	0	0
PCLAF	0	0	0	0	0	0	0	0	0	0	0	0	0	0	0	0	0	0	0	0	0	0	0	0	0	0	0	8680.95	118.63	2314	0	0	0	0	0	0	0	0	0	0	0	0	0	0	0	0	0	0	0
PDIA5	0	0	0	0	0	0	0	0	0	0	0	0	0	0	0	0	0	0	0	0	0	0	0	0	0	0	0	113.97	329.32	363.345	0	0	0	0	0	0	0	0	0	0	0	0	0	0	0	0	0	0	0
PGRMC1	0	0	0	0	0	0	0	0	0	0	0	0	0	0	0	0	0	0	0	0	0	0	0	0	0	0	0	8747.55	0	3730.7	0	0	0	0	0	0	0	0	0	0	0	0	0	0	0	0	0	0	0
POR	0	0	0	0	0	0	0	0	0	0	0	0	0	0	0	0	0	0	0	0	0	0	0	0	0	0	0	2558.2	0	1055.55	0	0	0	0	3270.8	1006.14	0	6909.1	5003.5	519.875	0	821.69	578.135	0	888.03	0	0	0	0
PREB	0	0	0	0	0	0	0	0	0	0	0	0	0	0	0	0	0	0	0	0	0	0	0	0	0	0	0	2394.8	1268.8	839.12	0	0	0	0	0	0	0	0	0	0	0	0	0	0	0	0	0	0	0
PSIP1	0	0	0	0	0	0	0	0	0	0	0	0	0	0	0	0	0	0	0	0	0	0	0	0	0	0	0	16492	0	2924.75	0	0	0	0	0	0	0	0	0	0	0	0	0	0	0	0	0	0	0
PTCD3	0	0	0	0	0	0	0	0	0	0	0	0	0	0	0	0	0	0	0	0	0	0	0	0	0	0	0	3043.1	0	1303.2	0	0	0	0	978.375	414.095	0	5337	3827.7	0	0	0	0	0	0	0	0	0	0
RBMX	0	0	0	0	0	0	0	0	0	0	0	0	0	0	0	0	0	0	0	0	0	0	0	0	0	0	0	82882.5	21657	52127	0	0	0	0	0	0	0	0	0	0	0	0	0	0	0	0	0	0	0
RHOG	0	0	0	0	0	0	0	0	0	0	0	0	0	0	0	0	0	0	0	0	0	0	0	0	0	0	0	3253	0	1808.85	0	0	0	0	0	0	0	0	0	0	0	0	0	0	0	0	0	0	0
RIF1	0	0	0	0	0	0	0	0	0	0	0	0	0	0	0	0	0	0	0	0	0	0	0	0	0	0	0	2360	0	2182.8	0	0	0	0	0	0	0	0	0	0	0	0	0	0	0	0	0	0	0
RNPS1	0	0	0	0	0	0	0	0	0	0	0	0	0	0	0	0	0	0	0	0	0	0	0	0	0	0	0	989.09	2290.75	2074	0	0	0	0	0	0	0	0	0	0	0	0	0	0	0	0	0	0	0
RRP1B	0	0	0	0	0	0	0	0	0	0	0	0	0	0	0	0	0	0	0	0	0	0	0	0	0	0	0	7870.75	0	1832.52	0	0	0	0	0	0	0	0	0	0	0	0	0	0	0	0	0	0	0
SACM1L	0	0	0	0	0	0	0	0	0	0	0	0	0	0	0	0	0	0	0	0	0	0	0	0	0	0	0	2138.1	0	1259.65	0	0	0	0	0	0	0	1998.65	2887.6	0	0	0	0	0	0	0	0	0	0
SCAF11	0	0	0	0	0	0	0	0	0	0	0	0	0	0	0	0	0	0	0	0	0	0	0	0	0	0	0	2809.3	467.64	722.86	0	0	0	0	0	0	0	0	0	0	0	0	0	0	0	0	0	0	0
SFXN3	0	0	0	0	0	0	0	0	0	0	0	0	0	0	0	0	0	0	0	0	0	0	0	0	0	0	0	14528	357.98	3815.3	0	0	0	0	0	0	0	0	0	0	0	0	0	0	0	0	0	0	0
SLC25A22	0	0	0	0	0	0	0	0	0	0	0	0	0	0	0	0	0	0	0	0	0	0	0	0	0	0	0	6240.85	0	3204.75	0	0	0	0	0	0	0	0	0	0	0	0	0	0	0	0	0	0	0
SLC25A5	0	0	0	0	0	0	0	0	0	0	0	0	0	0	0	0	0	0	0	0	0	0	0	0	0	0	0	452805	21698.5	262650	0	0	0	0	0	0	0	0	0	0	0	0	0	0	0	0	0	0	0
SLC25A6	0	0	0	0	0	0	0	0	0	0	0	0	0	0	0	0	0	0	0	0	0	0	0	0	0	0	0	113945	0	46030.5	0	0	0	0	0	0	0	39270.5	34159.5	0	0	0	0	0	0	0	0	0	0
SNX8	0	0	0	0	0	0	0	0	0	0	0	0	0	0	0	0	0	0	0	0	0	0	0	0	0	0	0	601.413	912.19	757.7	0	0	0	0	0	0	0	0	0	0	0	0	0	0	0	0	0	0	0
SPCS3	0	0	0	0	0	0	0	0	0	0	0	0	0	0	0	0	0	0	0	0	0	0	0	0	0	0	0	2492.1	0	725.705	0	0	0	0	0	0	0	0	0	0	0	0	0	0	0	0	0	0	0
SSR1	0	0	0	0	0	0	0	0	0	0	0	0	0	0	0	0	0	0	0	0	0	0	0	0	0	0	0	4529.4	0	1045.15	0	0	0	0	0	0	0	0	0	0	0	0	0	0	0	0	0	0	0
STX7	0	0	0	0	0	0	0	0	0	0	0	0	0	0	0	0	0	0	0	0	0	0	0	0	0	0	0	4147.8	640.28	893.21	0	0	0	0	545.46	1076.1	0	0	0	829.135	0	800.685	0	0	0	0	0	0	0
SYPL1	0	0	0	0	0	0	0	0	0	0	0	0	0	0	0	0	0	0	0	0	0	0	0	0	0	0	0	6249.9	0	2289.4	0	0	0	0	0	0	0	0	0	1596.8	0	6578.35	3348.1	0	5820.15	0	0	0	0
TAX1BP3	0	0	0	0	0	0	0	0	0	0	0	0	0	0	0	0	0	0	0	0	0	0	0	0	0	0	0	1790.9	0	3150.8	0	0	0	0	0	0	0	0	0	0	0	0	0	0	0	0	0	0	0
TBL1XR1	0	0	0	0	0	0	0	0	0	0	0	0	0	0	0	0	0	0	0	0	0	0	0	0	0	0	0	520.94	780.365	662.965	0	0	0	0	617.675	232.025	0	2199.95	674.72	0	0	0	0	0	0	0	0	0	0
THEM6	0	0	0	0	0	0	0	0	0	0	0	0	0	0	0	0	0	0	0	0	0	0	0	0	0	0	0	1547.75	0	735.105	0	0	0	0	2625.5	3389.6	0	2375.75	1334.05	0	0	0	0	0	0	0	0	0	0
TOR1AIP1	0	0	0	0	0	0	0	0	0	0	0	0	0	0	0	0	0	0	0	0	0	0	0	0	0	0	0	32802	0	3077.4	0	0	0	0	0	0	0	0	0	0	0	0	0	0	0	0	0	0	0
UBAP2	0	0	0	0	0	0	0	0	0	0	0	0	0	0	0	0	0	0	0	0	0	0	0	0	0	0	0	1463.4	0	664.365	0	0	0	0	0	0	0	0	0	0	0	0	0	0	0	0	0	0	0
UQCR10	0	0	0	0	0	0	0	0	0	0	0	0	0	0	0	0	0	0	0	0	0	0	0	0	0	0	0	2191.55	0	847.765	0	0	0	0	0	0	0	0	0	0	0	0	0	0	0	0	0	0	0
VAMP3	0	0	0	0	0	0	0	0	0	0	0	0	0	0	0	0	0	0	0	0	0	0	0	0	0	0	0	3429.15	0	656.285	0	0	0	0	1129.84	522.685	0	2761.4	1157.3	0	0	0	0	0	0	0	0	0	0
ZMPSTE24	0	0	0	0	0	0	0	0	0	0	0	0	0	0	0	0	0	0	0	0	0	0	0	0	0	0	0	2067	0	562.92	0	0	0	0	2459.2	570.71	0	5469.55	1424.94	0	0	0	0	0	0	0	0	0	0
PRKAR1A	0	0	0	0	0	0	0	0	0	0	0	0	0	0	0	0	0	0	0	0	0	0	0	0	0	0	0	0	718.015	577.275	0	0	0	0	0	0	0	845.85	504.22	0	0	0	0	0	0	0	0	0	0
RBM7	0	0	0	0	0	0	0	0	0	0	0	0	0	0	0	0	0	0	0	0	0	0	0	0	0	0	0	0	2121.95	1259.15	0	0	0	0	0	0	0	0	0	0	0	0	0	0	0	0	0	0	0
DRG1	0	0	0	0	0	0	0	0	0	0	0	0	0	0	0	0	0	0	0	0	0	0	0	0	0	0	0	0	0	0	25323.5	24524.5	22907.5	0	0	0	0	0	0	0	0	0	0	0	0	0	0	0	0
PIN4	0	0	0	0	0	0	0	0	0	0	0	0	0	0	0	0	0	0	0	0	0	0	0	0	0	0	0	0	0	0	31913	16275.5	26345.5	0	0	0	0	0	0	0	0	0	0	0	0	0	0	0	0
SNRPA	0	0	0	0	0	0	0	0	0	0	0	0	0	0	0	0	0	0	0	0	0	0	0	0	0	0	0	0	0	0	115055	66400	91124	0	0	0	0	0	0	0	0	0	0	0	0	0	0	0	0
DDX6	0	0	0	0	0	0	0	0	0	0	0	0	0	0	0	0	0	0	0	0	0	0	0	0	0	0	0	0	0	0	0	0	0	26941	20570	15083.5	0	0	0	0	0	0	0	0	0	0	0	0	0
LRRC47	0	0	0	0	0	0	0	0	0	0	0	0	0	0	0	0	0	0	0	0	0	0	0	0	0	0	0	0	0	0	0	0	0	27579	35738.5	24529	0	0	0	0	0	0	0	0	0	0	0	0	0
ATP5ME	0	0	0	0	0	0	0	0	0	0	0	0	0	0	0	0	0	0	0	0	0	0	0	0	0	0	0	0	0	0	0	0	0	0	541.135	988.76	0	0	0	0	0	0	0	0	0	0	0	0	0
CCDC97	0	0	0	0	0	0	0	0	0	0	0	0	0	0	0	0	0	0	0	0	0	0	0	0	0	0	0	0	0	0	0	0	0	0	932.015	665.655	0	0	0	0	0	0	0	0	0	0	0	0	0
CNOT7	0	0	0	0	0	0	0	0	0	0	0	0	0	0	0	0	0	0	0	0	0	0	0	0	0	0	0	0	0	0	0	0	0	0	805.3	589.85	0	0	0	0	0	0	0	0	0	0	0	0	0
CNPY3	0	0	0	0	0	0	0	0	0	0	0	0	0	0	0	0	0	0	0	0	0	0	0	0	0	0	0	0	0	0	0	0	0	0	2997.3	965.115	0	0	0	0	0	0	0	0	0	0	0	0	0
CPVL	0	0	0	0	0	0	0	0	0	0	0	0	0	0	0	0	0	0	0	0	0	0	0	0	0	0	0	0	0	0	0	0	0	0	2658.75	404.51	0	0	0	0	0	0	0	0	0	0	0	0	0
DHCR7	0	0	0	0	0	0	0	0	0	0	0	0	0	0	0	0	0	0	0	0	0	0	0	0	0	0	0	0	0	0	0	0	0	0	14334	21346.5	0	0	0	0	0	0	0	0	0	0	0	0	0
DNAJC19	0	0	0	0	0	0	0	0	0	0	0	0	0	0	0	0	0	0	0	0	0	0	0	0	0	0	0	0	0	0	0	0	0	0	1021.87	492.29	0	1872.15	1363	0	0	0	0	0	0	0	0	0	0
FAF2	0	0	0	0	0	0	0	0	0	0	0	0	0	0	0	0	0	0	0	0	0	0	0	0	0	0	0	0	0	0	0	0	0	0	944.715	2488.94	0	404.005	895.445	0	0	0	0	0	0	0	0	0	0
HIRIP3	0	0	0	0	0	0	0	0	0	0	0	0	0	0	0	0	0	0	0	0	0	0	0	0	0	0	0	0	0	0	0	0	0	0	854.905	307.545	0	0	0	0	0	0	0	0	0	0	0	0	0
HKDC1	0	0	0	0	0	0	0	0	0	0	0	0	0	0	0	0	0	0	0	0	0	0	0	0	0	0	0	0	0	0	0	0	0	0	46835.5	70738	0	22361.5	54686	281525	0	294730	183175	0	353310	0	0	0	0
IER3IP1	0	0	0	0	0	0	0	0	0	0	0	0	0	0	0	0	0	0	0	0	0	0	0	0	0	0	0	0	0	0	0	0	0	0	2657.85	3892.5	0	0	0	0	0	0	0	0	0	0	0	0	0
IRF2BP2	0	0	0	0	0	0	0	0	0	0	0	0	0	0	0	0	0	0	0	0	0	0	0	0	0	0	0	0	0	0	0	0	0	0	659.135	331.695	0	1161.15	969.66	0	0	0	0	0	0	0	0	0	0
MOB3A	0	0	0	0	0	0	0	0	0	0	0	0	0	0	0	0	0	0	0	0	0	0	0	0	0	0	0	0	0	0	0	0	0	0	2457.9	1575.2	0	3744.65	5929.8	0	0	0	0	0	0	0	0	0	0
MRPL27	0	0	0	0	0	0	0	0	0	0	0	0	0	0	0	0	0	0	0	0	0	0	0	0	0	0	0	0	0	0	0	0	0	0	548.815	498.185	0	845.45	3158.2	0	0	0	0	0	0	0	0	0	0
MRPL55	0	0	0	0	0	0	0	0	0	0	0	0	0	0	0	0	0	0	0	0	0	0	0	0	0	0	0	0	0	0	0	0	0	0	458.78	293.2	0	2892.7	3199.1	0	0	0	0	0	0	0	0	0	0
MRPS34	0	0	0	0	0	0	0	0	0	0	0	0	0	0	0	0	0	0	0	0	0	0	0	0	0	0	0	0	0	0	0	0	0	0	367.29	354.665	0	0	0	0	0	0	0	0	0	0	0	0	0
MTARC1	0	0	0	0	0	0	0	0	0	0	0	0	0	0	0	0	0	0	0	0	0	0	0	0	0	0	0	0	0	0	0	0	0	0	1723.6	510.4	0	2311.45	1604.15	0	0	0	0	0	0	0	0	0	0
NCLN	0	0	0	0	0	0	0	0	0	0	0	0	0	0	0	0	0	0	0	0	0	0	0	0	0	0	0	0	0	0	0	0	0	0	731.375	914.33	0	1551.45	1422.26	0	0	0	0	0	0	0	0	0	0
NDUFA12	0	0	0	0	0	0	0	0	0	0	0	0	0	0	0	0	0	0	0	0	0	0	0	0	0	0	0	0	0	0	0	0	0	0	1455.8	953.265	0	4096.9	2611.25	0	0	0	0	0	0	0	0	0	0
NDUFB5	0	0	0	0	0	0	0	0	0	0	0	0	0	0	0	0	0	0	0	0	0	0	0	0	0	0	0	0	0	0	0	0	0	0	884.845	607.99	0	3458.65	1312.27	0	0	0	0	0	0	0	0	0	0
NT5C3A	0	0	0	0	0	0	0	0	0	0	0	0	0	0	0	0	0	0	0	0	0	0	0	0	0	0	0	0	0	0	0	0	0	0	1105.16	1047.14	0	0	0	0	0	0	0	0	0	0	0	0	0
NUP214	0	0	0	0	0	0	0	0	0	0	0	0	0	0	0	0	0	0	0	0	0	0	0	0	0	0	0	0	0	0	0	0	0	0	2139.8	948.83	0	1215.21	3427.35	0	0	0	0	0	0	0	0	0	0
OTULINL	0	0	0	0	0	0	0	0	0	0	0	0	0	0	0	0	0	0	0	0	0	0	0	0	0	0	0	0	0	0	0	0	0	0	2525.75	4028	0	1755.05	2153.75	0	0	0	0	0	0	0	0	0	0
PNPLA4	0	0	0	0	0	0	0	0	0	0	0	0	0	0	0	0	0	0	0	0	0	0	0	0	0	0	0	0	0	0	0	0	0	0	305.55	340.96	0	0	0	0	0	0	0	0	0	0	0	0	0
PTRH2	0	0	0	0	0	0	0	0	0	0	0	0	0	0	0	0	0	0	0	0	0	0	0	0	0	0	0	0	0	0	0	0	0	0	7063.05	2473.35	0	9461.65	3833.4	0	0	0	0	0	0	0	0	0	0
RETREG3	0	0	0	0	0	0	0	0	0	0	0	0	0	0	0	0	0	0	0	0	0	0	0	0	0	0	0	0	0	0	0	0	0	0	1966.55	4099.55	0	3102.75	1896.95	0	0	0	0	0	0	0	0	0	0
ROMO1	0	0	0	0	0	0	0	0	0	0	0	0	0	0	0	0	0	0	0	0	0	0	0	0	0	0	0	0	0	0	0	0	0	0	3258.8	1497.3	0	2350	2634.35	0	0	0	0	0	0	0	0	0	0
SAMM50	0	0	0	0	0	0	0	0	0	0	0	0	0	0	0	0	0	0	0	0	0	0	0	0	0	0	0	0	0	0	0	0	0	0	3006.75	729.07	0	4526.55	4149.75	0	0	0	0	0	0	0	0	0	0
SLC35A4	0	0	0	0	0	0	0	0	0	0	0	0	0	0	0	0	0	0	0	0	0	0	0	0	0	0	0	0	0	0	0	0	0	0	2967.1	2879.35	0	3068.6	1564.15	0	0	0	0	0	0	0	0	0	0
SMC2	0	0	0	0	0	0	0	0	0	0	0	0	0	0	0	0	0	0	0	0	0	0	0	0	0	0	0	0	0	0	0	0	0	0	3722.5	2887.15	0	0	0	0	0	0	0	0	0	1668.6	2478.05	2808.25	2378.6
[truncated: 267 more rows]
[truncated: 80 more columns]
