# Supplementary material for: Analysis of context-specific KRAS–effector (sub)complexes in Caco-2 cells
Source: Life Sci Alliance. 2023 Mar 9;6(5):e202201670. doi: 10.26508/lsa.202201670 (PMC9998658; doi:10.26508/lsa.202201670)
Supplement: Supplementary file 6 [file LSA-2022-01670_TableS3.xlsx]

## Sheet: log2_biolrepl_wide_excel
Table S3. Log2 transformed AP-MS data with biological triplicates.
hgnc	12c_dmog_20_1	12c_dmog_20_2	12c_dmog_20_3	12c_dmog_200_1	12c_dmog_200_2	12c_dmog_200_3	12c_egf_20_1	12c_egf_20_2	12c_egf_20_3	12c_egf_200_1	12c_egf_200_2	12c_egf_200_3	12c_il6_20_1	12c_il6_20_2	12c_il6_20_3	12c_il6_200_1	12c_il6_200_2	12c_il6_200_3	12c_pge2_20_1	12c_pge2_20_2	12c_pge2_20_3	12c_pge2_200_1	12c_pge2_200_2	12c_pge2_200_3	12c_tnfa_20_1	12c_tnfa_20_2	12c_tnfa_20_3	12c_tnfa_200_1	12c_tnfa_200_2	12c_tnfa_200_3	12c_unstim_none_1	12c_unstim_none_2	12c_unstim_none_3	12d_dmog_20_1	12d_dmog_20_2	12d_dmog_20_3	12d_dmog_200_1	12d_dmog_200_2	12d_dmog_200_3	12d_egf_20_1	12d_egf_20_2	12d_egf_20_3	12d_egf_200_1	12d_egf_200_2	12d_egf_200_3	12d_il6_20_1	12d_il6_20_2	12d_il6_20_3	12d_il6_200_1
ABCB11	14.9717	11.8686	9.22151	14.4725	13.2954	12.1589	13.4118	0	13.4491	11.537	14.3584	12.8114	0	0	0	0	0	0	0	0	0	0	0	0	13.1858	13.8866	12.9098	0	0	0	0	0	0	0	0	0	13.2537	12.0515	11.7524	0	0	0	0	0	0	0	0	0	0
ABHD10	10.1462	13.49	12.92	11.5286	12.0587	12.8727	0	0	0	10.4672	0	11.4225	0	11.7472	10.893	10.2218	11.1603	10.0385	0	10.7016	9.21964	0	10.8493	10.8825	12.25	11.779	11.0558	11.3549	11.2762	11.586	0	0	0	0	13.0262	13.1657	11.6165	12.5614	12.7951	11.6974	9.82169	10.7794	11.7963	0	10.6183	11.0444	0	10.2396	0
ACAA1	9.38927	12.1586	13.0184	11.5347	11.7122	12.8907	12.3571	0	11.5473	12.3877	6.60127	12.8232	10.2989	13.1089	12.1094	12.2053	9.78984	11.2467	10.4786	11.9032	11.6131	11.8164	12.3168	12.4723	12.8299	12.3988	12.1424	13.9448	13.1015	13.5741	0	0	0	10.0326	10.0408	12.826	11.8034	11.7961	12.0366	12.1316	0	12.1512	12.3081	0	11.9819	12.3451	11.7342	12.0997	11.973
ACAA2	14.2444	14.8163	14.631	13.8962	15.3377	14.6926	13.9041	12.21	12.9515	14.0895	12.6965	14.1857	12.5517	14.3819	13.9337	13.0565	13.3616	13.2465	0	0	0	12.2707	13.6401	13.1787	14.5456	14.344	14.1809	13.9026	14.3513	14.2603	0	0	0	13.6572	15.0145	14.6065	14.243	15.0637	15.0034	14.2701	13.2397	13.8802	14.0144	12.942	13.7178	14.2782	12.9183	13.6327	14.0707
ACADVL	13.4836	14.0629	14.2155	13.2954	13.2383	13.9101	12.8789	11.2272	11.9979	11.6972	9.90486	12.2253	13.6037	12.3819	12.9324	13.2157	11.4809	12.8433	12.2392	12.3327	12.2858	13.2915	11.7176	12.8696	14.3195	13.7682	13.182	13.5263	12.9951	13.4944	0	13.7292	13.2124	12.9364	12.6342	14.0908	13.1846	12.9162	13.1457	13.1809	8.88258	13.159	13.1613	11.6489	13.2744	12.4377	13.2747	13.1394	12.2449
ACAT1	14.8925	15.0238	14.8786	14.935	14.9214	15.0739	14.3502	14.5967	14.3695	14.2111	15.0045	14.1129	14.0088	14.7459	14.457	14.2535	13.8142	13.9791	14.916	13.5975	13.7176	15.0659	14.338	14.1439	14.4887	14.3477	14.152	14.5415	14.4451	14.5315	14.9961	14.7315	14.9251	14.3199	15.1263	14.4598	14.0757	15.433	15.1451	14.4137	15.4748	14.596	14.2456	14.2167	14.2833	14.9165	14.3987	14.6138	14.8401
ACOT13	14.2069	14.701	14.3284	14.3665	14.9208	14.4828	0	0	0	0	0	0	0	0	0	0	0	0	0	0	0	0	0	0	0	0	0	0	0	0	0	0	0	14.0555	14.8771	13.5662	14.7187	14.735	14.5586	0	0	0	0	0	0	0	0	0	14.0265
ACSL3	13.315	15.0279	14.5934	12.3376	14.9019	14.4884	11.9512	12.5093	10.9079	12.7912	13.2506	12.8706	13.7947	11.8408	12.4918	13.6548	12.6883	13.265	13.4061	11.9393	12.5322	13.9823	12.7769	12.7872	14.8207	14.105	13.3309	14.691	12.5013	13.9159	12.9328	13.6144	13.4229	12.2387	15.2471	14.8642	13.3567	14.7573	14.9569	13.3531	9.62894	12.8445	12.9538	12.733	12.4755	11.7623	13.3693	12.7851	9.72228
ACSL5	11.665	13.5054	11.5659	0	13.9826	12.3615	0	0	0	0	0	0	11.2096	12.0919	11.6077	11.7579	11.6413	12.1962	0	0	0	0	0	0	11.7559	10.4117	9.24615	13.9641	8.2823	10.732	0	0	0	12.7578	13.7999	13.2589	11.4491	13.3036	13.3637	0	0	0	0	0	0	11.557	10.1682	10.2134	9.81446
ACTN1	8.87526	10.1197	10.0089	10.3052	11.2121	11.2993	13.8876	6.06049	11.9029	14.7696	9.24201	15.0913	9.12377	9.99764	5.9698	9.35567	12.1463	10.612	0	13.6545	13.3623	0	14.2708	14.1053	0	8.39109	10.3502	10.6851	7.91964	10.2376	0	0	0	0	11.6414	10.9104	0	13.1147	12.862	13.8033	10.0231	13.2148	15.1466	5.63923	14.5458	10.2549	9.55481	9.80298	6.81544
ADAM10	9.1902	13.0542	13.0896	9.47543	11.7785	12.7525	9.93909	0	9.82231	0	0	0	11.4225	9.5034	10.7739	12.0944	9.50075	11.3668	0	0	0	0	7.91301	9.23694	12.8313	11.9479	10.2994	12.0127	9.80686	11.5093	0	0	0	9.19037	12.6998	13.329	11.713	10.2036	11.5672	10.3992	0	10.2947	9.72432	0	9.7821	0	0	0	0
AFDN	15	15.8336	15.4984	13.6778	15.4966	15.2289	13.6674	11.0274	12.9623	11.8729	11.1755	12.4715	11.0205	11.1926	11.0764	10.6558	9.19865	10.3902	15.3939	9.74725	11.8623	15.7812	10.9346	11.7431	15.4835	14.1193	10.4606	14.7253	10.9162	13.7236	10.9797	10.7278	10.6199	13.9255	14.6274	14.5072	14.378	14.3717	14.9269	13.8215	9.55192	12.7548	12.8816	11.498	12.2621	10.2748	10.9203	10.8662	9.82524
AGPS	12.4949	14.2702	13.6353	12.2163	14.1901	14.0866	12.6707	10.6002	11.968	13.9537	10.3952	13.4972	12.6559	11.6955	11.8501	11.7847	10.1747	10.9895	12.4914	11.6373	11.4544	12.7757	13.0954	12.6318	13.927	13.1641	11.6416	13.7647	11.5574	12.9839	0	12.5924	12.19	12.0415	14.8777	14.5792	13.1967	15.1467	15.4243	14.3755	9.70665	13.687	13.5885	10.286	13.0274	11.4035	11.9049	11.419	10.8643
AHCYL2	13.0237	14.1722	14.3221	12.5553	13.9067	14.0791	12.9022	13.3573	12.6661	13.5897	13.533	0	0	11.8702	13.1374	11.8403	13.1181	12.2823	0	12.7356	12.8278	0	12.9	13.6931	13.9242	13.2404	12.578	13.8568	11.622	12.9684	13.4927	12.9728	13.551	0	13.6146	14.1077	13.2383	13.4277	11.7995	12.1135	12.7892	12.7381	13.0138	0	12.422	0	0	0	0
AHNAK	10.9372	13.3736	14.021	11.2962	14.8045	14.8846	14.5061	13.0703	13.8588	14.0155	5.86843	14.7857	8.1879	10.0331	8.73162	9.20194	9.02889	8.09321	3.20005	15.353	14.8403	0	14.5673	15.0094	8.92474	10.7438	12.77	17.7832	13.0567	16.6434	9.40521	12.0473	11.3799	9.67396	14.8319	15.4242	10.4561	15.3392	15.5768	14.5386	7.89324	14.1627	14.4358	8.25545	14.3883	9.784	13.228	11.8738	11.2179
ALDH18A1	12.9162	13.6933	13.4255	13.4831	13.7625	13.7706	11.7531	14.288	12.7863	13.6212	13.8695	13.8091	14.0279	15.0902	14.7359	14.2358	13.1065	13.8834	10.7822	13.3671	12.9521	11.5926	13.8523	13.4728	13.4289	14.6179	15.3734	13.3561	15.5673	14.9546	14.3301	12.6877	13.2432	11.9839	14.5611	14.2775	13.5378	14.5087	14.6365	13.3623	13.4043	13.1608	12.8318	13.8177	12.935	15.1811	14.6455	14.8229	14.7926
ALDH3A2	11.0001	13.061	13.9542	10.3813	13.1324	13.5207	11.4888	0	9.70713	8.84678	0	9.55067	0	0	0	0	0	0	11.696	7.27506	8.71081	11.7717	0	9.9498	14.2901	13.0558	9.93496	13.8062	7.80632	12.5758	0	0	0	11.0443	12.7547	13.7794	12.3632	11.7259	11.0522	12.2807	0	12.1783	11.1928	0	11.6449	0	0	0	0
ALDH9A1	10.6252	11.1919	11.5298	12.306	12.0875	12.2618	11.4842	0	10.2638	12.263	9.99393	11.4521	12.1147	12.654	12.0979	12.5323	11.7828	11.9754	0	12.2642	11.9499	0	12.8158	13.0321	0	0	0	0	12.8117	11.6519	0	0	0	0	12.0108	11.8865	10.9878	12.1434	11.7763	11.6664	10.8442	11.0228	11.379	9.00991	11.0879	12.8261	11.7123	11.9264	12.5278
ALDOA	17.5883	17.8104	17.7006	17.633	17.7588	17.7913	16.9468	17.2355	16.7544	17.727	17.4795	17.1706	0	0	0	0	0	0	17.4588	16.636	16.768	17.6858	17.2429	17.0017	0	0	0	0	0	0	17.8842	17.5382	17.6982	17.2629	17.7637	17.5853	17.2462	17.8369	17.575	16.964	17.3254	16.8588	17.2081	17.2118	17.0827	17.2433	17.4125	17.3149	17.173
ALDOC	13.7617	16.1025	16.0516	14.0787	15.8356	15.9966	13.9199	12.747	13.3684	11.037	14.0532	13.2823	14.1622	14.6469	14.5113	15.1085	13.9099	14.6806	0	14.2682	13.4138	0	15.1288	14.613	14.3734	14.1195	14.0182	14.3478	14.7063	14.7507	0	15.1967	13.6606	0	15.616	15.8135	13.9394	15.1323	15.5098	13.5767	8.14037	14.0052	14.7162	13.2441	14.4662	13.3695	14.8574	14.3134	13.2026
ALKBH5	9.23848	11.4597	11.1483	9.62152	11.9626	11.3005	0	0	0	0	0	0	9.69811	10.4363	10.1136	10.0631	11.3121	8.96609	12.2223	10.7463	10.4745	12.635	9.64671	8.69707	10.514	10.7773	10.6203	10.5374	10.5327	9.94784	11.3283	9.71978	10.5286	0	10.9538	10.674	10.7741	10.4488	9.63055	10.7058	0	9.6248	9.77404	0	10.676	10.7872	9.98897	9.98507	11.496
ALYREF	15.1861	15.2362	14.8131	0	0	0	0	0	0	0	0	0	0	0	0	0	0	0	0	0	0	0	0	0	15.4597	15.5454	15.5787	16.9996	15.4947	16.4607	16.0213	15.4587	15.4553	15.9454	14.7516	14.7287	15.7659	14.4418	14.9044	0	0	0	0	0	0	0	0	0	0
ANP32B	14.6962	16.0536	16.2319	14.6103	15.8456	15.9794	0	0	0	0	0	0	0	0	0	0	0	0	15.598	14.8236	14.862	0	0	0	16.4718	15.8282	14.3013	0	0	0	0	0	0	0	0	0	0	0	0	0	0	0	0	0	0	0	0	0	0
ANXA2	17.0331	16.5292	16.6685	16.8817	17.6604	17.6357	16.4622	17.71	16.9425	16.9915	16.6857	16.7237	0	0	0	0	0	0	15.0231	18.2018	18.1521	15.4917	17.472	17.4311	0	0	0	18.975	15.8947	18.0944	0	0	0	17.1698	17.777	17.9301	16.3829	18.2273	18.1483	17.1131	16.2772	16.9791	16.4107	16.3065	16.3801	0	0	0	0
AP1M2	7.71239	10.4857	10.1025	0	0	0	0	0	0	0	0	0	0	0	0	0	0	0	0	10.7451	9.98298	0	10.1377	10.5123	0	0	0	9.57341	10.4397	10.8159	0	0	0	0	10.9872	10.6417	0	10.5132	10.7275	0	0	0	11.0275	0	10.4737	0	0	0	0
ARAF	14.4558	13.1127	14.0405	13.534	12.7074	13.3489	11.3003	12.2835	12.0483	0	11.8037	10.3124	12.6296	8.38871	10.3798	10.9651	0	9.68738	14.2584	7.32953	11.3169	14.9649	7.80813	10.6358	15.0582	13.5765	8.83697	14.0515	9.10438	12.9976	9.58577	12.1826	12.5778	13.9119	12.5978	12.9056	13.9792	10.2007	11.5944	12.1303	0	11.8914	11.0187	12.3325	11.9025	0	11.7606	9.81735	0
ARCN1	17.7383	17.3643	17.1715	18.0842	17.2676	17.3846	18.1014	18.0529	17.922	18.0043	17.9919	17.9574	16.9159	18.3955	18.0997	0	0	0	16.3638	18.798	18.6006	16.2031	18.3921	18.1868	0	0	0	15.9455	17.6096	17.0115	16.9523	16.4582	16.7391	18.2967	17.703	17.6696	17.8098	16.8514	17.3588	18.2604	17.5607	17.9167	17.7299	18.1885	17.8215	18.1112	16.6482	17.5578	18.4752
ARHGAP28	11.7747	15.0921	14.9384	12.3877	14.5098	14.4176	12.0135	0	10.6379	12.479	0	11.8555	0	0	0	0	0	0	0	0	0	13.8115	6.43687	7.63677	14.7397	13.0897	8.83466	14.146	0	12.7886	0	0	0	13.2931	14.3576	14.3087	13.8471	13.5181	13.5323	12.7643	0	12.2449	12.1663	0	11.3335	0	0	0	0
ARID4B	12.2989	12.0457	12.6722	10.5648	11.1477	12.4802	11.3927	10.8971	10.5293	0	0	0	11.4986	12.2885	12.139	11.3937	12.4974	11.8125	0	11.9894	11.1689	0	11.0206	12.0695	11.6012	12.3557	13.0043	11.3804	13.1252	12.5903	0	0	0	12.14	12.147	11.6871	11.7464	10.7065	10.2172	12.4668	0	11.8002	0	0	0	11.7665	11.7858	10.9648	10.8442
ARL6IP1	13.9122	15.2479	15.0453	13.7979	15.04	14.6975	14.204	12.6294	13.7278	12.0838	12.7675	12.2938	0	0	0	9.62255	11.9332	10.9188	13.7451	0	13.2709	0	0	0	14.5796	13.8949	12.5228	13.0061	12.756	13.4114	0	0	0	13.358	15.1327	14.8911	13.5737	13.551	14.4703	14.1752	12.2543	13.9947	14.0541	12.7011	14.0069	0	0	0	0
ARL6IP5	12.5825	13.1446	13.7559	13.6146	11.017	12.3212	0	0	0	0	0	0	0	0	0	0	0	0	12.776	10.9207	11.8887	14.1036	8.13453	11.4099	14.4283	12.1506	12.7769	13.8436	11.5983	11.8928	0	0	0	12.472	11.7678	12.963	12.7253	0	11.5771	12.7911	0	13.5145	0	0	0	0	0	0	0
ARL8B	10.6219	12.2842	11.2213	8.90456	12.1754	12.1326	11.4895	10.0171	10.1111	12.4781	0	11.5491	8.55132	11.2064	9.98224	0	11.3617	10.2624	0	11.1351	9.55405	0	12.0408	11.1966	11.1993	11.2349	12.2386	11.4971	11.7239	11.7394	0	0	0	0	13.3195	12.9212	0	13.8201	13.2718	12.7276	0	11.0862	12.2768	0	10.9691	0	0	0	0
ARMC8	10.5008	11.4795	11.6764	11.3838	11.8909	10.6031	0	0	0	8.91112	0	10.4456	10.8383	12.6041	12.1692	11.5892	11.7283	11.7096	0	0	0	0	0	0	9.63925	11.38	11.5865	10.3583	11.7339	11.3591	0	0	0	0	11.5933	11.6464	12.1669	10.5121	11.5046	10.4145	10.9318	10.7413	10.5643	10.3223	10.5303	11.7912	11.5882	11.8814	11.6777
ARPC1A	11.3335	11.6098	10.3916	0	11.7565	10.6098	11.7376	11.1357	10.7638	15.6395	0	14.5994	11.7154	10.4758	10.4716	10.7805	10.5069	10.4549	0	13.2265	12.6796	0	13.49	11.8492	8.72206	12.0798	11.0456	0	11.6793	9.84872	14.4807	12.8691	12.9292	0	13.3086	12.0597	10.8152	12.8457	12.095	12.5319	11.9388	11.9317	14.2626	11.7101	13.1814	12.5138	12.5843	12.1899	12.1989
ARPC5	13.1539	12.3203	11.2584	12.2667	12.1552	10.7546	12.7734	12.9512	11.5833	15.3695	13.3245	12.1636	13.8936	14.0433	13.9315	13.5955	15.0946	14.5867	12.856	14.0887	14.1172	12.7602	12.4361	13.0761	12.5308	14.1466	14.7931	13.5205	14.6656	14.2967	12.896	13.9167	13.9773	11.1944	13.2989	11.7766	11.3201	12.9361	12.0663	11.4713	12.7161	12.7793	14.0201	12.6694	14.1502	14.336	13.7419	13.8903	14.4298
ASPSCR1	12.0192	5.379	9.93993	12.5281	0	10.4179	9.07791	11.9109	10.495	11.0731	10.55	9.86402	10.9342	14.0891	13.8243	11.7439	14.4615	13.5147	0	11.182	10.0951	0	8.62783	10.8911	9.79767	12.5411	14.3445	0	14.1684	12.7075	0	11.7163	10.9804	0	0	0	0	0	0	0	12.9167	10.7933	8.67266	11.6471	6.71205	13.7028	11.1524	12.0349	13.2993
ATIC	9.39153	12.7761	12.3771	11.3747	12.1922	12.5249	14.099	0	12.7389	12.7545	0	13.2418	5.82087	11.7212	10.8368	9.81905	12.0685	11.4658	8.75405	13.9624	13.5156	0	14.9843	14.772	10.1056	11.4253	12.0821	10.8139	11.8042	11.5751	0	0	0	0	12.7652	12.8902	8.6262	12.8575	13.2646	14.2674	8.13554	13.5529	14.8021	9.06692	14.3331	11.7301	7.22752	9.80542	10.8887
ATP2A2	10.2394	15.0839	14.5454	10.2259	14.8991	14.6699	11.2267	7.86617	9.332	8.5377	8.33842	7.47796	0	0	0	3.94364	10.2609	7.94556	12.63	7.47396	7.18042	13.2326	10.0643	9.50722	14.6245	13.4781	11.6566	15.6631	10.9805	14.5691	4.87066	8.4048	8.59451	8.77844	15.3439	15.3173	10.3811	14.5145	14.3802	11.1455	0	12.1082	11.0649	0	11.9901	0	0	0	0
ATP5F1B	11.9368	13.386	12.6681	10.5723	15.8168	15.3619	14.0538	14.5685	13.8779	16.6272	6.21727	16.1974	0	10.3335	9.43393	10.8726	11.996	11.4124	14.1781	13.5796	13.521	14.0582	14.8879	14.6085	13.9682	13.6814	13.4565	18.3302	13.3409	17.3243	13.469	13.2975	12.8087	0	16.0751	15.6147	8.45876	16.9115	17.5146	15.3867	6.99061	14.4243	14.4573	9.21661	13.9728	11.3064	13.5371	12.8094	12.6965
ATP5F1C	8.32611	10.9873	10.8852	0	13.3115	13.2704	0	0	0	13.3627	0	13.896	0	0	0	0	0	0	0	0	0	0	11.4544	11.6512	10.6214	8.68829	8.29347	15.0239	9.87028	13.9321	0	0	0	0	13.9117	14.1358	0	14.1884	15.0927	12.5467	0	12.0652	11.2002	0	11.7942	0	0	0	0
ATP5F1EP2	11.9527	9.78562	11.7027	0	0	0	10.0149	13.4074	11.7971	0	0	0	12.4015	11.3072	11.7751	11.9408	11.5023	11.8253	0	0	0	0	0	0	11.1012	11.3333	11.4392	14.3704	11.1604	13.3828	12.0042	12.1108	12.3002	0	0	0	0	0	0	10.2429	11.4807	11.2454	10.5466	11.0743	10.8755	11.8492	12.9142	12.6751	11.7331
ATP6V1E1	15.1941	15.8329	15.021	16.068	15.1938	15.1775	14.7241	15.8406	16.4962	16.2891	15.9582	16.173	16.0173	16.463	16.0837	15.1716	16.4438	15.6591	15.6046	15.1542	15.3305	15.8385	15.2407	16.0727	15.6232	16.1162	16.4688	15.47	15.8231	15.6888	15.3887	15.5335	15.6736	15.6772	16.1094	15.2525	15.681	16.4031	16.0461	16.0749	15.2202	15.4645	16.3331	15.8382	15.7863	16.1896	14.9661	15.814	16.2554
ATP6V1G1	11.3315	11.3632	11.5003	11.6629	12.1516	11.3903	10.5628	10.6059	10.8308	12.8718	11.0693	11.746	11.1616	12.4081	11.9955	11.5886	12.6295	12.0902	0	12.0735	11.5773	0	12.8672	12.8696	11.1487	11.8784	12.3181	9.38571	12.0083	11.6337	0	0	0	0	11.1243	11.2288	0	12.9001	11.2572	11.6369	10.6923	11.1936	12.4022	9.88116	11.1492	11.5789	11.5194	11.5408	11.7456
ATXN2L	12.0921	14.0263	13.4471	12.1899	14.5102	13.9863	12.0632	11.6041	11.3789	13.3905	10.6973	12.4082	11.5535	12.7747	12.4217	12.2482	11.7826	12.0502	12.5424	11.7671	11.7871	11.9304	12.7167	12.0658	12.3004	12.5694	12.8862	13.9522	13.5492	13.985	12.1696	11.9131	12.602	0	13.9679	13.4367	10.9592	13.9464	13.7313	12.4071	11.4175	11.8109	12.3932	11.1091	11.8378	12.8969	11.9943	12.4304	12.3947
BAIAP2L1	11.1439	11.6368	11.0846	11.564	10.7361	10.326	0	0	0	11.6528	0	12.1168	0	0	0	0	0	0	0	0	0	10.5326	8.8999	9.17278	10.2044	9.67174	8.88991	9.63018	9.21352	9.66545	0	0	0	11.7844	11.0326	10.3375	11.758	10.9415	11.2926	10.83	0	10.1238	11.462	9.72795	9.70745	0	0	0	0
BRI3BP	11.2166	14.4332	13.7881	10.9097	13.8992	13.9464	0	0	0	0	0	0	0	0	0	0	0	0	0	0	0	0	0	0	13.987	12.5686	0	13.7711	0	12.4522	0	0	0	12.3222	13.6707	13.8661	11.7127	11.863	13.6805	0	0	0	0	0	0	0	0	0	0
BTF3	12.9678	13.4592	13.6066	12.1905	13.9884	13.7617	14.3466	12.0119	13.0843	14.7124	12.2016	13.8041	12.1292	12.1419	12.1327	12.6435	12.7821	12.5829	12.6942	13.0794	12.8692	13.116	13.5925	13.6347	12.5708	12.0554	12.12	12.9853	12.1065	12.5214	0	12.6331	12.0139	12.2518	13.3101	13.332	12.1687	14.6288	13.436	14.3742	12.5491	13.6744	14.1452	12.5442	13.8012	11.6253	12.2197	12.1897	11.6896
BUB3	15.0294	15.2019	14.6805	14.8058	14.7791	14.6325	12.8431	14.3178	13.3829	10.6931	15.4937	13.4971	14.6556	14.7367	14.5682	14.3274	14.0096	14.0995	14.7161	13.9617	13.9455	15.1063	14.1607	13.7906	15.1317	14.9615	14.6538	12.9889	14.7328	14.2488	14.3907	14.3957	14.3492	14.9068	14.9516	14.6268	15.1806	13.4519	14.6185	13.3413	14.9817	13.9157	13.0268	14.9028	13.331	14.7907	13.7263	14.372	14.2492
BUD31	10.8879	9.32002	10.8569	10.8699	10.9548	10.8333	0	0	0	9.8107	0	9.31442	9.92794	9.7664	10.8898	0	0	0	0	0	0	0	8.68548	9.03918	10.037	9.80759	10.0588	9.0325	10.077	9.52004	0	0	0	11.9215	9.97696	10.209	11.9364	9.44206	8.60833	9.65831	9.90041	9.3974	8.41633	0	8.85521	9.16739	9.97317	10.2445	0
BZW1	11.6731	16.1501	16.2392	13.9324	15.7114	16.0402	0	0	0	0	0	0	0	0	0	0	0	0	15.5928	12.1667	13.1085	15.3708	12.4951	12.4349	16.6621	15.4099	10.9701	16.0402	9.88122	15.0098	0	0	0	12.8562	15.7742	15.5642	14.3061	14.8759	15.0561	13.7221	0	13.7087	0	0	0	0	0	0	0
BZW2	13.1742	16.5435	16.3571	13.9309	16.4985	16.3106	0	0	0	0	0	0	0	0	0	0	0	0	15.5889	13.7524	13.5853	15.4141	13.3967	13.3436	16.6358	15.3872	11.373	16.0803	12.1388	15.0324	0	0	0	14.1439	16.4221	16.3556	15.2235	15.6987	15.8864	14.5833	10.9954	14.203	14.2073	12.112	13.8431	0	0	0	0
CACYBP	14.1371	15.1971	14.9725	14.1857	15.3946	14.9478	15.0572	14.0905	14.6358	15.5462	14.0365	15.1689	0	0	0	0	0	0	13.8062	14.8137	14.5443	13.4037	14.9898	14.8796	13.9914	14.0907	14.2784	14.0782	14.294	14.301	0	0	0	13.3938	15.2885	14.8383	13.6233	15.5836	15.0685	15.2711	14.1674	14.8231	15.0637	14.2405	14.8823	0	0	0	0
CALD1	12.5041	11.8646	12.3367	11.6998	12.1982	11.9895	15.6769	13.2366	15.3211	16.8905	12.4197	17.0025	12.1092	12.6102	12.3368	11.9699	12.3965	12.2069	10.0505	14.1792	13.9001	10.2175	12.9668	12.8936	10.7055	12.2762	12.2629	13.1936	12.8372	13.0589	11.6628	12.0797	12.3037	11.6239	10.8412	11.0804	11.517	12.7667	12.2079	15.6405	12.485	15.2567	16.2167	13.0914	15.9673	12.5685	12.3418	12.7243	12.5517
CAPRIN1	14.2381	14.4765	14.2338	0	0	0	0	0	0	0	0	0	15.8567	13.0924	14.5133	15.2776	12.9718	14.6278	0	0	0	0	0	0	14.8122	14.2911	13.6358	0	0	0	14.3512	15.049	15.3412	0	0	0	0	0	0	0	0	0	0	0	0	13.9543	14.7861	14.2149	12.7817
CBR1	9.10276	11.5154	11.5332	9.16177	10.7175	11.6854	13.268	0	10.5883	9.63735	0	10.3492	0	11.525	9.56843	10.1248	12.4438	9.67306	0	13.2831	12.5836	7.42139	13.1034	13.8632	8.89417	8.79307	11.3201	7.9794	11.0888	10.5732	0	0	0	0	11.7445	11.8647	0	10.2972	11.6044	11.1955	0	12.9111	12.9817	7.00607	13.5822	9.257	0	7.76335	0
CBX3	11.7584	13.5035	12.5374	12.7019	13.4762	13.1394	14.2488	10.5378	12.8444	13.4237	12.5569	13.9598	11.0412	12.9862	12.4021	11.6925	13.7799	12.8363	0	14.8429	14.445	0	16.0061	15.5664	11.9488	12.5696	13.2678	15.2473	13.3111	14.6201	0	0	0	0	13.3686	12.6577	0	14.1902	14.2943	13.8617	11.4268	13.1217	14.9808	0	14.6429	13.4601	11.9737	12.6041	13.4721
CCDC124	10.9014	11.7782	12.306	10.4134	12.1828	12.4594	11.958	0	10.4569	10.8534	0	10.3189	9.61884	9.35136	9.75202	10.4122	0	9.81565	12.7865	10.4517	10.6691	12.928	11.3702	11.1383	12.1641	10.9656	9.68718	0	0	0	0	0	0	11.8719	11.8271	11.8186	10.9488	11.3028	11.2656	12.5922	0	11.9801	11.5738	8.60344	11.6012	0	0	0	0
CCNK	11.0674	12.5029	11.2699	9.66342	11.7124	10.6287	0	0	0	0	0	0	0	0	0	9.51627	9.62988	8.75694	0	0	0	12.4389	10.4747	9.19698	11.9499	11.5884	10.7548	11.0445	10.9695	11.0186	12.0412	10.475	0	0	11.6371	10.5646	11.9894	11.596	11.0281	0	0	0	0	0	0	0	0	0	0
CCT3	15.7036	15.5894	15.7298	15.4308	15.8451	15.8552	15.252	15.3801	15.1311	15.7041	15.5011	15.0448	15.2454	15.8949	15.6721	0	0	0	0	0	0	0	0	0	15.6076	15.4523	15.2425	15.1412	15.52	15.4417	0	0	0	15.0334	15.6187	15.6438	15.6836	15.8212	15.6104	15.6638	15.9291	15.4983	15.3712	15.7034	15.27	15.67	15.48	15.5465	15.8004
CCT4	16.2986	16.0587	15.9088	15.9561	16.2788	16.0902	15.4624	15.7908	15.3438	0	0	0	15.6783	16.0401	15.786	0	0	0	0	0	0	0	0	0	0	0	0	0	0	0	16.0178	15.9211	15.8179	15.8401	16.3104	15.86	16.1248	15.8436	16.0503	15.7388	16.5299	15.6999	15.5793	16.1614	15.4644	16.0848	15.7118	15.7388	16.3077
CCT5	15.5274	15.4788	15.2487	15.735	15.831	15.6441	14.3232	15.3494	14.6446	0	0	0	15.1438	16.0285	15.8281	15.4288	17.5019	16.7416	0	0	0	0	0	0	15.337	16.6206	17.0864	13.978	16.3711	15.7488	0	0	0	14.9099	15.7348	15.306	15.8834	15.2579	15.441	14.9404	16.0292	14.913	14.5421	15.5437	14.7172	16.3008	15.4101	15.7982	16.0023
CCT7	16.0331	15.1585	15.582	15.7303	15.1685	15.4025	14.7738	15.6662	15.1496	0	0	0	15.7435	15.9942	15.8356	15.7867	14.7408	15.2771	0	0	0	0	0	0	15.8808	15.4876	14.9387	15.2159	15.5222	15.314	15.923	15.919	15.8162	15.5199	15.1337	15.4257	0	0	0	14.9391	16.4332	15.2383	14.4983	15.9885	14.8501	15.9077	15.9061	15.7633	16.0797
CCT8	16.2459	15.4477	15.68	15.8845	15.5519	15.9035	15.8064	16.0815	15.7588	0	0	0	16.2358	16.4246	16.3664	0	0	0	15.2793	15.5032	15.3745	0	0	0	0	0	0	0	0	0	16.2312	16.3458	16.4833	0	0	0	0	0	0	15.9541	16.6993	15.7803	15.7351	16.3786	15.795	16.3194	16.2364	16.2579	16.5889
CDC37	10.6523	12.5516	11.2821	11.9203	12.4752	11.8314	10.6288	10.1064	11.1836	12.5743	11.4538	12.1612	11.7177	12.2329	11.7521	11.0841	12.9883	12.322	0	13.56	12.4359	0	13.6561	13.6443	12.4598	13.2929	13.3355	10.3386	12.6161	11.773	0	0	0	0	12.7393	11.7285	9.67349	12.8794	12.4879	10.8489	10.2786	9.96707	12.8956	10.4548	12.0987	11.7524	10.6995	12.1199	12.6001
CDC42	10.2242	12.5704	11.6858	12.0249	12.7732	13.2569	14.3283	11.8275	13.2767	14.1209	11.3346	13.6688	0	11.879	10.5887	0	0	0	11.6996	13.3285	12.6515	12.5851	14.1813	13.48	12.2362	12.1272	11.9971	14.1495	12.0737	13.3813	0	0	0	11.7615	13.6392	12.8691	11.8211	14.2884	14.1537	14.4066	10.6642	13.9733	14.7012	10.438	13.8234	12.5062	0	11.4661	12.2406
CDC5L	10.4877	11.3192	11.0072	0	10.7093	10.0776	0	0	0	0	0	0	9.15985	9.16818	9.74865	10.2772	6.63925	9.35335	0	0	0	12.563	0	9.80464	11.9095	9.74974	10.4673	11.3582	10.1845	10.6191	0	0	0	10.5563	11.4036	10.2909	13.2509	10.8784	10.356	0	0	0	0	0	0	0	9.90107	8.7126	0
CDC73	14.7194	13.91	13.6092	13.98	14.2569	14.1304	8.36628	13.6313	10.9152	9.64903	13.7851	10.7345	12.6213	12.936	12.7174	12.2164	12.5028	12.312	13.5954	11.9078	12.055	14.0848	11.4499	11.527	12.4822	12.6936	13.0687	12.4871	13.1378	13.0074	10.1408	12.9403	13.2523	14.3556	13.1285	13.3314	13.9854	12.9238	13.4065	10.9905	14.1482	12.1729	8.13553	13.6372	10.5976	13.1872	12.997	12.8959	13.1323
CEP164	10.81	10.1317	10.4669	13.2333	11.6112	12.056	12.1675	11.5743	12.2701	12.2944	10.2863	11.3919	0	0	0	0	0	0	0	13.8763	13.5123	0	13.6331	13.4191	0	0	0	10.4747	11.438	10.5117	0	0	0	9.88591	11.2884	11.4671	11.2096	11.6732	11.4347	12.2898	10.3861	12.2868	12.6196	11.9562	12.8285	0	0	0	11.8148
CFAP20	13.7137	10.4066	13.7525	13.3691	12.2834	12.275	11.036	11.8982	11.6699	0	13.9574	11.5083	13.0646	13.136	13.3344	12.6693	11.7646	12.412	12.3713	13.2117	12.7649	12.1674	12.24	13.2793	13.9306	13.5171	12.796	11.2736	13.1448	12.8333	12.0045	12.3473	12.755	14.5284	0	12.9355	0	0	0	11.101	13.3027	12.6506	11.3728	13.4551	12.4721	13.2207	12.1613	12.8765	12.2504
CHID1	11.212	11.1101	11.3312	11.1415	11.7428	10.8774	0	0	0	8.05975	0	9.42172	11.3972	11.5714	11.4848	0	0	0	0	0	0	0	0	0	0	0	0	0	0	0	0	0	0	0	11.8218	11.9382	0	9.72727	10.7901	0	0	0	0	0	0	0	0	0	0
CIRBP	15.0403	14.77	14.848	14.7798	15.0037	14.584	0	0	0	0	0	0	0	0	0	0	0	0	0	0	0	0	0	0	0	0	0	0	0	0	15.1189	14.9753	15.0298	0	0	0	0	0	0	0	0	0	0	0	0	0	0	0	0
CISD2	11.0528	13.1943	12.7388	8.72144	12.0664	12.3993	0	0	0	9.58834	0	9.95159	0	0	0	0	0	0	10.9245	9.8999	9.11442	11.954	10.1739	9.45495	13.7005	12.4527	8.80051	13.4202	0	12.3039	0	0	0	12.3951	13.1048	13.4019	11.4706	11.0376	11.3176	0	0	0	0	0	0	0	0	0	0
CKAP5	10.6912	12.5384	12.2236	10.6702	12.8763	12.5381	12.7873	7.85212	12.4042	13.271	0	13.0545	12.4528	13.6225	13.0977	12.0854	14.3125	13.0271	0	12.9805	12.5395	11.7222	13.7064	13.7214	12.8264	13.9805	14.582	12.6407	14.0061	13.9363	0	0	0	0	13.311	12.4638	12.737	13.2981	13.047	13.3459	0	12.5847	12.7863	11.2369	12.4039	12.896	12.1292	12.5835	13.1299
CLPB	9.77737	11.3703	10.6937	9.6256	12.636	11.4115	0	0	0	0	0	0	10.0812	9.57514	9.66378	10.8238	0	10.0217	0	0	0	0	0	0	10.7787	10.5587	0	9.1853	9.73027	8.99529	0	0	0	0	0	0	0	0	0	0	0	0	0	0	0	10.1052	10.0821	10.0293	0
CNP	10.5302	12.0891	12.6975	10.709	12.006	12.0638	9.46552	0	7.50692	9.37055	0	10.5452	8.33918	9.83553	9.67507	10.3932	0	9.51006	9.77457	10.4799	9.99065	11.0033	11.203	10.6886	12.1111	11.1205	10.5117	11.5488	10.9597	11.4631	0	0	0	10.8104	12.6127	12.6415	12.012	11.7517	12.336	10.9395	0	10.3276	9.85171	0	9.29672	9.04701	9.23591	8.18673	0
COPB1	17.639	16.8902	16.9391	18.072	16.8984	17.2392	18.2155	18.0673	17.8599	17.8459	17.93	17.9875	16.9596	18.4816	18.1104	0	0	0	16.1478	18.8364	18.6265	15.8535	17.9921	18.0667	0	0	0	16.1899	17.6658	17.1405	17.237	16.7015	16.572	18.4071	17.4954	17.5914	17.8965	16.7842	16.9816	18.1858	17.4514	17.9905	17.584	18.2101	17.7692	18.0111	16.6736	17.4061	18.524
COPE	17.0218	17.4227	17.3132	17.5446	17.1641	17.3415	18.4142	17.4214	17.7958	18.6144	17.7912	18.4988	16.8443	18.4825	18.1436	0	0	0	16.7103	18.6718	18.4593	16.1201	18.2833	18.0857	0	0	0	16.1957	17.7816	17.2834	0	0	0	17.643	17.6268	17.7511	17.2355	17.3494	17.1927	18.3706	17.3206	17.894	17.9184	17.9447	17.9067	18.1364	16.5354	17.4975	18.33
COPG1	18.0426	17.3123	17.3587	18.5209	17.3529	17.5236	18.588	18.5673	18.3974	17.7483	18.4145	18.2601	17.2797	18.8675	18.5592	0	0	0	16.8571	19.0596	18.9738	16.4838	18.4736	18.3511	0	0	0	16.5445	18.0661	17.5383	0	0	0	18.8712	17.9663	17.8996	18.2961	17.4402	17.5237	18.6215	18.0427	18.3134	18.0021	18.5083	18.0828	18.6214	16.963	17.9164	19.061
COPS4	11.497	12.412	12.9023	11.7458	12.5367	12.9586	11.9816	0	10.413	11.3394	0	11.9693	13.7768	11.7752	12.6171	12.0635	12.2424	12.5111	0	12.6828	11.2488	0	13.43	13.3622	9.82212	11.0508	12.3759	11.1012	12.8949	12.58	0	0	0	0	12.6853	12.8232	11.6648	12.1837	12.8078	13.223	0	12.7982	12.3561	9.62009	12.6796	12.0134	13.8642	13.5796	11.3002
CPSF6	8.39159	14.4484	13.8787	11.3105	12.6445	12.7968	0	0	0	9.4359	0	9.84975	11.3609	12.1037	12.0167	10.9884	11.6623	10.0237	13.327	10.9141	11.5487	13.3123	9.13421	11.4141	14.2293	13.4675	12.3386	13.1381	12.7425	12.7788	11.6168	12.1413	10.9795	11.34	13.9059	12.9008	13.5469	12.6761	12.5136	7.78319	11.5349	11.1132	0	0	0	11.7864	11.1286	11.5023	10.3571
CPSF7	9.36431	13.0183	12.7665	10.7045	12.6038	11.9797	0	0	0	10.587	11.7159	10.446	10.2234	11.9762	11.6343	11.1664	10.9712	10.9321	10.8683	10.4273	10.5685	12.5603	11.0372	10.4917	11.8653	12.2102	12.3029	11.5174	12.312	12.4434	0	11.0447	10.2953	9.24783	12.6403	12.2393	12.7057	12.2148	12.2332	9.03873	11.7458	10.2493	8.63234	10.1993	9.18495	11.3922	10.7898	10.8949	0
CRYBG2	10.9396	10.7897	8.95363	11.9087	11.2523	12.2527	12.9271	0	11.7168	14.6625	11.779	14.4491	11.5912	8.78409	0	0	0	0	0	11.9988	11.3914	0	11.6223	10.1389	0	0	0	0	0	0	0	9.22072	11.1768	0	8.98931	11.2806	0	7.56171	11.0718	12.835	0	12.8399	13.6346	0	12.4516	0	0	0	0
CS	19.174	19.0447	19.2937	19.4176	18.6673	19.1452	18.8049	19.2805	18.811	0	0	0	19.7133	19.3067	19.4358	19.2856	19.9029	19.7108	19.0493	19.321	19.4209	19.4711	18.5384	18.692	19.9384	19.9124	19.9216	18.9254	19.5151	19.2035	19.717	18.9505	19.1759	19.6838	18.4586	19.2932	0	0	0	18.7522	18.8873	18.8897	18.3426	19.3886	18.7111	19.5845	18.8041	19.1652	19.9466
CSNK1A1	13.4381	13.4705	13.2669	13.2439	12.9772	13.2766	12.7107	11.6386	12.2205	8.91313	13.1047	11.9554	12.4785	13.377	13.1868	12.4061	12.8557	12.6656	12.5136	13.1571	12.9161	12.7368	12.4518	12.6962	13.1025	13.3738	13.5071	12.2056	13.6384	13.1112	12.4088	12.2821	12.2579	13.939	13.3478	13.5609	14.3487	12.2358	13.0469	12.9113	13.0425	12.8821	12.3366	12.8846	12.7259	13.3342	12.1408	12.6442	13.122
CSNK1D	10.3414	11.2976	9.46787	0	12.2194	10.4637	0	0	0	0	0	0	10.2297	10.4902	10.5056	9.93241	10.3993	9.71005	0	0	0	0	0	0	10.8622	9.40045	10.2148	9.59824	11.4247	11.2041	0	0	0	12.5511	11.2367	11.0791	0	0	0	0	0	0	0	0	0	0	0	0	0
CSNK2A1	12.5263	15.0095	14.6572	0	0	0	0	0	0	0	0	0	0	0	0	0	0	0	0	0	0	0	0	0	0	0	0	0	0	0	0	0	0	0	0	0	0	0	0	0	0	0	0	0	0	0	0	0	0
CSNK2A2	12.7462	15.0588	14.4161	12.5726	14.9212	14.3929	0	0	0	0	0	0	0	0	0	0	0	0	0	0	0	0	0	0	0	0	0	0	0	0	0	0	0	13.0399	14.8372	14.4338	13.5854	13.9327	14.1101	0	0	0	0	0	0	0	0	0	0
CSNK2B	11.5745	13.0286	12.7436	10.9883	12.2524	11.7774	10.0238	0	9.2771	12.0804	9.83058	10.9831	12.2944	10.8527	10.8234	11.7369	11.3333	11.4958	10.2886	10.485	11.1426	9.79826	11.903	10.8125	13.7789	12.3964	10.5966	13.1077	11.0498	12.0275	0	11.7612	11.8063	11.2203	12.3723	11.6229	12.5551	12.5435	11.2041	11.1875	10.0801	8.58026	10.4337	11.5564	9.24086	11.2216	11.55	11.3089	11.3888
CSTF3	12.5834	13.0942	13.9568	11.3874	12.6176	12.6627	12.8822	11.7666	11.3527	0	0	0	12.5908	12.8846	12.4367	12.6203	13.6115	13.2178	10.9776	11.1967	11.3833	12.441	9.80639	10.5308	13.319	14.0246	14.2907	12.851	14.0993	13.9043	0	12.6661	12.758	11.9	12.7059	12.6072	12.8782	11.9243	12.2991	0	12.9211	12.6721	9.57852	12.1128	12.9385	12.936	12.6962	13.0278	12.5064
CTNNA1	12.0619	12.6376	12.441	12.2234	13.367	13.4394	12.7934	9.56466	12.1482	12.961	10.6022	12.4807	12.1362	12.5226	12.529	12.5467	12.5251	12.3661	10.0728	14.3155	13.8874	10.4214	14.6832	14.4624	13.04	12.8433	12.741	14.2257	12.4485	13.5683	10.1367	12.3032	11.9543	9.84249	13.4196	13.5647	12.2514	14.3224	14.1824	13.5221	11.3481	13.3967	13.6169	10.2372	12.9618	12.5466	12.4002	12.4308	12.2574
CTNNB1	11.4336	10.4512	10.4157	10.4482	11.4961	12.0148	11.5331	0	10.1278	12.3715	0	11.8506	11.632	11.655	11.3875	10.2933	11.222	11.3896	10.0844	12.4281	12.1541	9.30638	13.555	13.3558	11.1231	11.1595	11.3996	12.7566	11.1909	12.0524	0	11.4757	11.6363	9.85635	11.9797	12.6269	11.2566	12.5687	12.639	12.548	10.7751	11.6319	12.1162	10.31	11.7281	11.6615	10.8875	11.8976	11.5404
CTNND1	13.9558	12.8635	13.171	13.3188	13.7243	13.5552	12.3429	12.7023	12.0808	13.2489	13.1036	13.5346	13.3463	13.2005	13.2652	13.2098	12.2492	12.7856	13.8919	13.7829	13.7076	14.1217	14.3725	13.8397	13.7221	13.372	12.9327	13.7831	13.2832	13.5964	13.3217	13.3868	13.5377	14.0011	13.8691	13.6773	14.1005	14.3026	14.2726	13.2879	13.0555	13.087	12.5198	12.7147	12.3591	13.0121	13.2746	13.2164	12.8926
CTSA	10.2847	10.2042	10.9294	11.8569	10.3781	11.6167	13.34	0	12.8353	12.551	0	11.8907	12.3043	11.2818	11.0995	10.8295	11.987	12.3742	0	12.4774	12.4716	0	13.3606	13.3359	11.8887	12.2623	11.843	13.0388	10.9932	12.533	0	0	0	0	10.3149	11.7332	11.5004	11.0607	11.791	12.5853	0	13.1245	13.8049	0	13.338	12.5148	11.9784	11.5391	12.1926
CTSB	10.0379	14.7497	14.2039	11.3899	14.0993	13.8517	13.3638	0	12.9386	13.8122	0	13.262	0	11.1093	10.4512	10.4493	11.4219	10.7417	13.5536	12.7505	12.8964	13.7489	13.5473	13.7112	14.0626	13.0359	11.2278	13.7075	10.8533	12.9992	0	0	0	0	14.1555	13.9224	11.8515	14.0491	13.5471	12.6938	0	12.6837	13.4253	10.6915	13.0846	11.0199	0	10.4412	10.865
CWC27	11.3842	12.2636	13.8694	0	0	0	0	0	0	0	0	0	0	0	0	0	0	0	12.3388	10.7879	9.85375	12.4503	8.57315	9.98385	12.6669	10.968	9.17153	11.9589	8.92452	10.2482	0	0	0	0	9.18337	13.7272	12.5626	0	9.65036	10.0643	0	8.7742	9.5461	0	9.95774	0	0	0	0
CWF19L1	12.4253	12.922	12.3682	0	12.6366	12.3457	0	0	0	0	0	0	12.0755	11.4647	11.5616	11.8764	11.1456	12.0259	0	0	0	10.8431	11.3339	11.4662	11.4309	11.6177	11.4669	0	12.004	11.4797	0	0	0	12.0647	13.3958	13.175	11.764	12.2076	12.1671	0	0	0	0	0	0	11.5476	11.7114	11.0247	11.4848
DAP3	11.7032	12.098	11.6051	9.87173	12.4335	12.33	9.94778	11.4122	10.3822	11.5744	11.0941	11.437	11.2135	12.4066	11.9168	11.646	9.9136	11.1197	0	0	0	0	9.19919	9.29902	10.396	11.441	11.8642	14.2368	12.3819	13.8773	0	11.1235	11.444	0	12.8714	12.6471	10.2099	13.2942	13.7743	11.3282	10.8121	11.1805	10.2763	11.7211	10.3455	12.0497	12.3746	12.3197	11.585
DARS1	10.0506	14.2467	13.8763	10.397	13.5173	13.9356	13.8274	0	11.711	12.3037	0	12.5307	8.97749	11.5906	11.052	10.5119	14.0207	12.5453	11.1895	13.5909	12.8344	9.7718	14.3298	14.346	13.1303	12.757	12.5989	12.4815	11.5417	11.9017	0	0	0	0	13.6229	14.0278	10.9669	13.4403	13.2394	13.665	8.29333	13.6135	14.2906	9.78674	13.6145	10.6941	9.01731	9.26718	9.73161
DARS2	9.54106	10.4863	12.0438	9.57817	9.80678	12.1318	0	0	0	10.4962	7.16732	9.53849	9.67656	9.80599	10.0633	0	0	0	10.6408	9.27306	9.2677	9.9369	7.57803	9.8885	12.1187	10.2954	8.54195	11.421	10.1916	10.5533	0	0	0	0	11.0805	11.7149	10.1298	11.0609	10.4763	9.57613	0	10.0389	8.21723	0	9.62071	0	9.7975	8.35949	0
DAZAP1	11.6648	7.41337	11.2783	0	10.0416	11.087	0	0	0	8.18636	11.0454	8.84721	0	0	0	0	11.9829	9.63546	0	0	0	0	10.8908	10.1692	9.04696	11.6655	12.0931	13.5912	12.659	13.142	0	0	0	0	0	0	0	9.71448	9.42864	0	0	0	0	0	0	9.33262	11.3476	10.691	0
DCAF7	10.6532	12.9711	12.4406	11.3804	12.3145	12.6326	10.728	9.75185	9.40916	0	11.7443	11.6977	11.4407	11.7442	11.5786	11.3406	11.2881	11.3263	0	12.1112	11.621	9.71946	11.6124	11.7817	11.6735	11.8444	12.1407	11.5415	12.2975	12.1031	0	0	0	0	12.6371	12.7477	12.1635	10.8517	12.4216	11.1713	10.6008	11.3989	10.976	11.1831	11.2016	11.3198	10.4176	10.9583	10.7568
DDB1	14.4048	14.8239	14.6863	14.6425	15.1263	14.8956	14.1394	13.949	13.8769	14.1322	14.4185	14.2075	14.1613	14.6039	14.4486	14.3311	14.7546	14.4386	14.2455	13.9593	13.8684	0	0	0	14.4855	14.5994	14.7868	0	0	0	0	0	0	13.6926	15.0899	14.7575	14.3338	15.0767	14.7779	14.1433	14.3804	14.117	14.0868	14.3541	13.9399	14.5662	14.0118	14.229	14.4956
DDX1	13.2903	12.9639	13.1936	12.5615	11.7236	11.6656	0	0	0	8.25555	11.1962	9.94905	12.7926	11.7771	11.7398	12.541	11.2046	12.1632	13.125	8.61763	10.3545	13.3977	10.9706	11.049	13.095	12.6712	12.0215	11.6154	12.3009	12.1053	11.6484	13.1863	12.7201	13.0744	12.2451	12.1809	13.7112	11.896	11.9774	10.4967	11.9762	11.3346	10.4571	10.5357	8.48297	11.8688	12.0572	11.7553	10.1142
DDX18	11.6297	12.6171	11.0025	12.8713	11.4905	12.3037	0	0	0	8.7665	11.2485	9.78876	12.7629	11.2637	12.2199	11.8967	11.5274	10.8868	0	10.7793	9.93667	0	0	0	12.0533	12.2664	12.0285	12.3473	11.6657	11.4964	0	0	0	12.2088	11.8595	11.5049	12.1503	11.6857	11.2702	0	0	0	0	0	0	10.3853	12.4786	12.9195	10.5035
DDX21	13.5345	14.8068	14.4231	12.4363	14.0803	14.3095	0	0	0	0	0	0	0	0	0	13.4199	13.1413	13.3653	14.5567	12.1538	12.7109	14.9311	11.5956	12.908	15.2685	14.6201	13.6821	15.2488	12.9893	14.4962	0	0	0	13.6419	13.5105	13.946	13.8901	12.0969	13.3168	0	0	0	0	0	0	0	0	0	0
DDX23	11.3459	10.7883	10.9261	5.46822	10.9683	9.49823	0	0	0	0	0	0	13.159	11.6264	12.4209	12.6735	9.91651	11.7175	0	0	0	10.3797	6.37196	8.61783	11.985	12.0257	11.6156	9.52478	12.8105	11.6876	11.2598	12.1997	12.4689	9.96679	11.4474	10.8926	11.7164	11.6297	10.474	10.9881	7.92095	5.57092	0	0	0	11.5312	14.077	13.4431	10.4564
DDX39B	11.0784	11.2794	11.522	11.1602	11.212	11.3163	11.7263	0	10.2884	11.2064	10.3495	11.3861	11.6089	12.705	12.1825	11.5575	12.2103	11.9549	0	12.6155	11.683	0	13.1529	12.5905	12.1334	12.2832	12.4288	13.9378	12.6334	13.4198	0	0	0	0	11.0855	10.9782	11.6602	12.0521	12.1269	12.4457	11.5657	11.0344	12.7538	11.7117	12.3149	11.8753	11.3493	11.8401	11.9187
DDX47	11.6365	9.25821	10.4578	11.7668	9.31556	9.0164	0	0	0	8.37167	11.6104	0	12.6284	10.4119	11.8019	12.6208	10.643	12.1089	13.5487	9.49042	10.9755	12.6616	9.13926	9.05284	12.2584	11.7815	11.6624	11.0604	10.5491	11.3954	11.5513	12.4188	12.7037	11.6879	9.33692	9.96337	12.4659	8.92954	9.09886	9.05236	11.5423	9.792	8.85915	10.4284	7.68993	11.2129	12.0116	12.0027	0
DDX56	11.567	10.857	11.7627	10.3974	10.8877	11.6098	0	10.6647	9.67183	0	0	0	12.274	10.4506	11.3815	11.9457	10.5544	11.3943	10.3851	7.98277	8.81946	11.7109	0	9.53498	11.1827	11.4867	11.2619	11.0589	10.5857	10.8837	11.3203	12.6271	12.6666	11.4275	11.3185	11.3936	11.7579	11.8389	9.35531	0	11.0702	9.46913	0	0	0	10.4051	12.3041	11.9087	10.6968
DHCR24	8.29464	14.5392	13.9796	7.6011	13.6366	13.9236	0	0	0	11.0668	10.8487	8.49837	11.7923	8.68032	9.69198	10.3385	0	7.73545	8.16007	6.98925	9.0631	10.9419	5.77555	9.37315	14.1472	12.1209	8.37689	14.3468	10.0572	12.9152	0	0	0	0	13.8455	14.5355	10.1914	12.9073	13.2051	12.0489	0	10.4246	10.5808	12.6542	8.30722	11.3415	10.0808	9.23916	9.46718
DHX15	13.4741	14.134	13.5742	0	0	0	0	0	0	0	0	0	0	0	0	0	0	0	0	0	0	13.9949	13.8079	13.3292	0	0	0	0	0	0	13.785	13.7859	14.1359	13.8214	13.9327	13.4726	14.1344	13.6929	13.7429	0	0	0	0	0	0	0	0	0	0
DHX9	11.8474	14.2876	13.8153	10.2893	14.3556	14.0211	0	0	0	0	0	0	0	0	0	0	0	0	0	0	0	0	0	0	0	0	0	0	0	0	0	0	0	0	0	0	12.0173	13.5003	13.4283	0	0	0	0	0	0	0	0	0	0
DNAJA1	14.0687	15.4022	15.0765	14.5736	15.3562	15.1109	0	0	0	14.3134	13.1864	14.1375	13.2085	14.6797	14.3081	13.3695	14.898	14.1077	0	0	0	0	0	0	15.2474	15.0842	14.919	14.4444	14.9411	14.7394	0	0	0	14.0733	15.7504	15.5303	14.578	15.123	15.0193	0	0	0	0	0	0	0	0	0	0
DNAJC7	10.9911	12.1193	12.5895	11.7434	12.5804	12.3292	12.1693	0	11.2965	10.6757	8.35248	11.7527	10.7143	12.1006	12.158	12.3214	12.4094	12.3065	0	12.223	11.742	0	12.7318	12.513	11.8356	12.0031	12.2376	11.515	12.3237	12.166	0	11.6804	11.2549	0	12.952	12.7275	11.2956	12.2333	12.6742	12.4022	11.4573	12.3149	12.6284	10.118	12.3119	12.0426	12.217	12.2456	10.6763
DNAJC8	13.6605	13.1753	13.1371	12.6379	12.429	12.2696	0	0	0	0	14.2042	9.93524	12.8664	10.8463	12.4451	12.5226	9.03246	10.7906	13.4873	0	9.71939	14.5229	10.2192	8.17986	12.841	12.0598	10.6835	8.80087	11.0952	9.67867	13.2548	11.7829	13.0023	14.0909	13.0626	12.6729	13.5008	10.1317	12.4309	7.79889	13.1742	9.8297	0	0	0	10.6198	11.1015	10.8684	10.4343
DOCK7	9.34275	6.71383	6.97339	9.4487	7.44464	8.1875	13.2676	0	11.6929	14.1709	0	14.0825	11.3781	11.6862	11.6884	11.5695	9.82915	10.8036	0	11.5218	9.68675	0	12.2486	10.7413	0	8.54272	10.4673	0	11.6445	9.07387	0	0	0	0	7.91361	7.93896	8.47913	8.84122	9.05646	14.1022	0	13.1486	12.764	0	11.5926	10.1308	12.4383	11.6605	9.26883
DPP4	10.3363	11.2674	12.1766	8.80064	12.3067	12.7792	13.4892	11.9659	11.9672	11.8205	0	13.4062	12.5082	10.7152	11.0977	11.4402	11.916	9.86406	10.7334	14.9259	14.6285	10.9524	15.0538	15.4271	13.6716	12.1512	9.55796	14.4664	9.63204	13.4668	0	12.6819	11.633	11.8	12.6943	13.6026	12.417	12.9402	14.342	13.7906	12.1507	13.9133	13.3464	11.9432	13.0381	9.38402	11.2769	11.4726	8.32152
DPYSL2	15.0777	13.1921	11.984	13.7404	14.1928	14.8239	16.6436	16.024	15.4774	13.7195	15.8636	15.7119	0	0	0	16.154	14.2238	15.4331	14.1248	16.5005	16.3875	15.2502	17.8399	17.4895	15.2469	12.3182	12.3163	14.4965	0	13.8203	16.2985	11.6653	13.9861	15.194	14.6166	14.3576	15.7587	13.7855	16.125	16.7814	15.5823	16.1413	17.5416	14.1954	16.8778	13.3784	14.8694	15.283	14.7801
DTD1	10.4408	12.3766	12.1134	11.7695	12.3971	11.999	11.4595	0	11.1881	12.0393	0	12.6288	0	0	0	9.32926	9.633	9.54874	9.31452	9.89939	9.56104	10.5598	11.0936	10.563	0	0	0	9.401	9.12159	9.91502	13.2147	11.2257	13.6228	11.3368	12.3701	11.8597	10.7918	12.0752	12.2153	11.8361	9.62919	11.5139	11.629	0	10.9639	0	0	0	0
EDF1	13.6883	14.3306	13.5703	12.9182	14.6545	14.1507	0	0	0	0	0	0	0	0	0	0	0	0	0	0	0	0	0	0	0	0	0	0	0	0	0	0	0	0	0	0	0	0	0	0	0	0	0	0	0	0	0	0	0
EIF1B	11.7541	12.3659	11.5711	11.8179	11.6329	11.6351	9.72871	11.4048	11.1638	10.6211	10.8494	9.52044	0	11.88	11.1506	0	12.2411	10.1961	0	11.1559	11.001	0	10.8917	10.5973	10.653	11.2861	11.9513	8.97358	12.4124	11.2298	0	0	0	12.3937	11.2222	10.7487	11.7124	10.5409	10.9417	9.8218	11.9751	10.1075	9.6324	11.1776	9.63648	11.1272	0	9.97654	11.4881
EIF2B1	13.4696	13.2127	13.1419	13.1077	13.3658	13.3061	13.0073	12.6359	12.771	13.1439	12.7417	13.1557	12.25	13.5885	13.1163	12.5276	9.74412	11.8308	9.70922	12.9464	12.5712	10.1939	13.4822	13.1029	10.3563	11.1382	11.9105	12.1394	13.2378	12.8119	10.2696	11.8846	8.55328	12.683	13.4047	13.4439	13.4868	13.1846	13.2106	13.3546	12.7127	13.2431	12.8405	12.8902	12.8469	13.2837	12.3268	12.7406	13.4684
EIF2B2	11.952	12.9587	12.7429	11.8271	13.466	13.0923	12.4116	10.8799	11.8236	12.4426	10.6027	12.2224	11.7321	12.9563	12.7432	12.2136	0	11.1159	0	12.3002	11.605	0	12.7965	12.1661	9.43018	10.1286	11.1021	11.6885	12.7127	12.3164	0	0	0	0	13.2324	12.7284	11.5577	12.7485	12.9112	12.476	11.2294	12.4689	12.0865	11.5544	11.9966	12.5892	11.8743	12.0951	12.5159
EIF2B3	18.5716	18.1275	18.4487	17.9831	18.1047	17.8461	17.4396	16.38	16.6605	18.51	16.9196	17.4434	16.9281	17.7331	17.4436	16.9151	15.5226	16.2583	18.2651	16.8412	16.9728	19.0172	17.3826	17.224	20.3554	19.1394	17.3144	18.2428	17.695	18.0558	0	0	0	17.3435	18.9317	17.9447	18.786	18.4272	18.0028	16.8556	16.8703	17.2619	17.1119	17.122	17.0397	17.3946	16.9173	17.2674	17.4992
EIF2B5	13.8189	14.3032	14.5565	13.6552	14.4007	14.1858	11.1414	11.2696	7.12691	7.95678	12.0857	11.1218	11.97	13.153	12.4374	11.6802	10.031	11.1545	14.0689	11.3356	12.1005	15.2443	10.1157	12.5491	16.6014	15.4785	12.4087	14.5232	13.0608	13.7889	0	0	0	13.313	14.1363	14.3503	14.8227	13.3259	13.5918	12.1291	11.1257	12.4954	9.93097	12.3697	11.3899	12.3145	11.1525	11.6753	12.4278
EIF3G	16.8924	16.5833	16.6245	16.7688	16.8806	16.6187	16.3629	17.141	16.5005	17.4216	17.2693	16.9184	17.3727	17.2206	17.277	17.3547	17.499	17.3903	16.3882	16.4545	16.3544	0	0	0	16.3108	17.0983	17.5104	15.3367	17.3844	16.769	16.4464	17.3291	17.3043	0	0	0	16.465	17.2183	16.5322	16.3465	17.136	16.3922	15.9319	16.9298	16.0022	16.9597	17.0575	17.0325	17.0489
EIF4A1	16.4405	16.6397	16.388	16.6689	16.6614	16.6144	15.8966	15.9419	15.7311	15.8813	16.0909	15.6908	16.342	16.7823	16.7302	16.433	16.6593	16.5971	15.9882	16.6014	16.4607	16.0756	16.8602	16.5354	16.3492	16.6616	16.7575	15.4651	16.7267	16.3424	0	0	0	16.4285	16.6512	16.4543	16.6745	16.3494	16.4498	15.9805	16.456	15.9172	16.0253	16.1528	15.9827	16.7498	15.9726	16.4592	16.7433
EIF4G1	15.55	15.9669	15.8762	15.4959	16.1405	15.9724	15.2627	14.9302	14.9626	15.6059	14.7119	15.6842	15.1363	15.4306	15.3361	15.0397	15.4483	15.1996	15.3497	14.734	14.6564	0	0	0	15.4719	15.473	15.441	14.7522	15.4567	15.1534	15.3405	15.4164	15.5135	15.9638	15.8394	15.7266	16.3203	15.5765	15.7438	15.3792	15.1632	15.1591	15.0006	14.9889	14.8171	0	0	0	15.2494
EIF4G2	15.0915	15.1661	14.9206	14.7249	15.1664	15.0841	0	0	0	0	0	0	15.0979	14.8479	15.0247	15.209	15.2009	15.2101	0	0	0	0	0	0	15.0503	15.0141	15.0212	0	0	0	14.8858	15.0997	15.2459	15.0813	15.1763	14.7216	15.4954	14.1842	14.8062	0	0	0	0	0	0	0	0	0	14.7102
EIF5	14.3418	14.3654	14.368	14.454	14.5909	14.5176	13.7763	13.5401	13.6497	14.24	13.4799	13.0904	14.1163	14.0697	13.8596	14.0033	14.685	14.142	14.0764	13.7207	13.6516	14.2677	14.4121	14.2098	14.8527	14.2996	14.103	14.3749	14.1295	14.2739	0	0	0	14.3333	15.0045	14.4063	14.7809	15.0141	14.8527	14.272	14.1563	13.9709	13.6248	14.0829	13.6249	14.1393	13.8561	13.7634	14.1137
EIF5B	16.0423	16.3217	15.9048	15.6512	16.2483	15.798	15.3992	15.6725	15.2551	16.0072	15.5471	15.5919	16.5165	15.3437	15.8054	16.1142	15.3909	15.7671	0	0	0	0	0	0	15.9892	15.5979	15.2768	15.2109	15.7032	15.4935	0	0	0	16.2939	16.5363	16.0257	16.4005	15.6138	15.8426	15.8719	14.6283	15.322	15.3264	15.7412	15.303	15.2884	16.0972	15.6548	15.5004
EML4	12.0361	13.3111	13.308	10.0788	13.2552	13.2301	12.2503	0	11.0373	12.6551	0	12.2812	10.2181	11.1661	11.754	11.5071	11.3444	11.4109	13.0302	12.4844	11.8934	11.9646	13.7687	13.8037	11.8455	11.2952	10.8458	11.2856	10.4045	11.3382	0	11.5385	11.2727	0	13.2741	12.7514	8.75566	12.8991	12.9268	12.8407	0	12.0269	12.462	0	11.9874	9.55225	11.5064	11.0836	0
ESYT2	10.6951	13.3685	13.0284	11.7023	13.2551	12.2905	9.75461	10.7107	10.7348	11.8963	0	10.6541	10.808	11.1675	8.82569	10.0186	11.8592	11.9113	12.9519	10.3661	10.5357	13.2087	10.1381	10.8498	14.1376	11.2923	11.5648	12.6941	8.80949	10.8954	0	0	0	12.9603	14.0787	14.5404	12.6822	13.5243	14.0381	10.9597	10.5876	10.3711	9.79866	0	9.81726	11.7602	9.00152	11.0353	11.2545
EWSR1	15.3199	15.4752	16.0397	0	0	0	0	0	0	0	0	0	0	0	0	0	0	0	0	0	0	0	0	0	15.894	15.6616	15.2073	16.288	15.6337	16.1028	0	0	0	0	0	0	0	0	0	0	0	0	0	0	0	0	0	0	0
FAM32A	9.8827	12.2875	10.8281	9.77129	11.9411	11.8339	0	0	0	0	0	0	10.7332	9.29749	10.3273	10.8317	0	9.05427	0	0	0	0	0	0	0	0	0	0	0	0	0	0	0	11.2549	12.1461	11.9266	10.8849	11.4958	11.7177	0	0	0	9.37968	0	8.75992	0	0	0	0
FARSA	10.273	13.0278	13.3819	8.49939	13.6735	12.7863	12.358	0	11.2984	13.4442	0	12.5665	0	0	0	10.2273	11.1816	10.6231	13.2876	11.0819	11.5906	13.6502	11.7069	12.3765	13.1848	12.146	9.31201	12.3409	0	11.1372	0	12.079	10.3817	9.23211	13.1578	12.4939	11.3499	11.9804	12.6047	12.6377	0	11.8878	12.2677	0	11.9504	0	10.8838	10.5925	0
FARSB	10.1686	13.8552	13.5476	9.84963	13.6531	13.1043	12.1478	9.33791	10.9621	13.1018	0	12.4931	9.27987	9.92727	7.70038	11.0946	9.94026	10.3328	13.9206	11.1545	11.8039	14.3189	12.6668	11.6964	13.5823	12.4803	10.5214	12.7142	9.21341	11.213	0	0	0	8.65664	13.6032	13.096	11.9468	13.218	13.2833	12.9352	0	12.1303	13.017	0	11.3131	8.61265	10.4032	9.63787	6.47624
FDFT1	16.0952	17.4286	17.4932	15.9789	16.7991	17.3569	15.5179	13.6261	14.8159	14.1789	13.4442	15.2555	13.1496	12.2467	12.3533	11.6455	12.2418	11.6949	16.2555	10.4483	13.2426	16.457	10.2018	12.766	17.5431	16.4207	13.6598	16.8901	13.2992	15.8834	11.809	12.2723	11.5494	16.9179	16.911	17.5685	17.5698	16.2396	16.8284	16.0338	12.1418	15.4576	15.1501	14.1224	15.0198	11.6733	12.2158	11.8159	12.0481
FKBP11	9.1897	8.39262	11.5425	0	0	0	0	0	0	0	0	0	0	0	0	0	0	0	0	0	0	0	0	0	10.4109	8.40831	0	11.9446	0	10.3529	0	0	0	0	8.38918	10.9525	0	11.8939	8.72392	0	0	0	0	0	0	0	0	0	0
FNTB	9.3033	10.1576	9.83231	0	12.6873	10.2493	0	0	0	10.6521	0	8.72404	0	0	0	0	0	0	0	0	0	0	0	0	0	0	0	8.74561	9.0471	8.7703	0	0	0	0	0	0	0	10.4443	9.46688	0	0	0	0	0	0	0	0	0	0
FOCAD	11.0466	14.5767	12.3482	12.9276	13.6503	13.9636	0	0	0	14.1625	12.8973	14.7537	13.4975	12.256	13.0122	13.8509	12.1221	12.9878	10.7679	11.8184	12.428	0	0	0	14.0339	13.2077	13.1032	0	13.141	12.1155	0	0	0	0	0	0	14.8972	12.5855	14.1565	0	0	0	13.3041	9.51361	12.8124	0	0	0	10.7773
FRG1	12.1802	11.5784	12.5922	10.4932	13.0981	12.5269	0	0	0	0	11.7935	10.4152	11.9027	10.1285	11.5068	11.5109	11.3123	11.6296	11.9146	9.91228	9.86783	12.0056	10.4029	9.49549	10.8885	11.2146	10.9325	9.45683	11.314	11.0611	0	12.5623	12.0815	12.7139	12.8184	11.5427	12.3733	11.5427	12.2372	10.7713	11.5044	11.1352	0	0	0	11.0619	11.7899	11.5802	10.7573
FUNDC1	13.6154	14.5267	15.1404	13.6773	15.8593	14.3444	13.3139	10.2502	12.9739	13.8497	0	14.5349	0	0	0	0	0	0	13.5908	0	10.4927	13.4493	0	8.93049	14.4788	14.1294	0	14.3711	9.02558	13.5469	0	0	0	14.1449	15.8814	14.1162	14.2784	15.2113	14.4157	13.1624	0	12.8905	12.528	10.4136	12.8793	0	0	0	0
FUNDC2	12.3977	14.9374	15.2134	12.1787	13.3526	14.3899	0	0	0	10.4762	8.31682	8.72748	0	0	0	0	0	0	0	0	0	13.5789	9.52054	9.80596	14.1653	12.982	8.64811	13.9266	8.63274	12.2989	0	0	0	13.2545	14.7118	14.8552	13.1729	12.9606	13.557	10.2074	0	8.98107	8.98797	9.58725	9.23318	0	0	0	0
FUS	15.9621	16.9763	16.8573	15.9513	17.0445	16.4427	13.9554	16.327	15.134	15.2952	16.7824	15.5538	14.9925	15.389	15.342	0	0	0	16.1019	14.6491	15.0494	16.2756	14.4023	14.5328	16.3761	16.0241	15.2811	16.5586	16.0787	16.4094	16.4194	15.3485	15.8785	16.3767	16.9183	16.1438	16.0327	16.5853	16.2855	14.194	16.0485	14.9224	0	0	0	15.5075	14.9118	15.304	15.2419
GAK	13.7347	13.867	14.2208	14.2741	14.0077	13.8905	0	0	0	14.0279	0	14.2563	15.0918	15.6313	15.0896	14.5738	14.6682	14.7104	0	0	0	0	14.1265	13.5189	14.0758	14.9942	15.2456	14.0875	15.2908	14.5403	0	14.6579	13.9688	0	14.0865	13.9387	15.4102	14.7	13.3237	0	0	0	13.0465	13.8581	14.3346	14.9493	14.8232	15.0727	14.6297
GCN1	11.2505	14.4481	14.2828	10.5702	14.2257	14.1401	12.1843	6.77768	10.5387	12.0848	0	11.6483	7.76563	7.7162	7.22521	8.36444	5.17117	6.58577	13.0195	10.4009	11.1927	12.9764	11.7287	11.8197	14.13	12.4613	6.10156	14.5218	7.67267	13.1441	0	0	0	11.1852	14.8327	14.995	11.0187	14.2884	13.9617	12.8223	0	11.9521	12.6557	4.17393	11.9445	6.79267	7.55367	7.13335	5.49297
GEMIN5	9.49396	11.035	10.4232	8.12787	11.1481	11.8896	11.3003	0	9.7364	11.407	0	11.4715	9.39829	12.9144	11.4212	9.42287	0	8.89359	0	12.141	10.5427	0	13.3025	13.0366	0	0	0	10.9307	12.3941	10.5446	0	0	0	0	11.8397	11.4662	8.47644	12.0029	11.9608	11.7569	9.01477	11.6782	12.3665	8.324	11.6143	10.325	8.85703	9.64903	9.6762
GLG1	11.5053	11.079	10.7915	0	11.3748	11.1713	0	0	0	0	0	0	12.4774	12.2354	11.4664	11.4216	11.8413	11.5182	0	0	0	0	11.0675	10.3252	12.3428	12.0776	12.4671	11.7663	12.4061	11.9093	0	11.5561	10.772	0	11.9298	11.2585	11.4227	12.3368	11.4366	0	0	0	0	0	0	11.8616	12.7775	12.2976	12.1926
GNB1	11.8991	12.176	12.6673	11.9679	13.5975	14.0647	14.1108	12.1554	13.288	13.9162	10.7244	14.0134	10.825	11.5988	11.0693	10.647	11.0382	10.8903	0	15.5668	15.3135	0	14.6974	15.2195	13.4251	13.1603	12.4502	14.5603	12.2829	13.5075	9.84643	10.4486	11.4548	15.1552	14.2714	14.0085	13.3116	14.6188	14.6704	14.7639	10.7305	14.2994	13.2752	10.7116	13.4165	12.272	10.664	11.2891	11.6029
GNB2	11.027	7.79116	9.07031	10.8042	10.8299	0	10.716	10.5542	11.9576	0	0	0	0	0	0	0	0	0	0	13.4137	13.0411	0	13.0871	13.2286	11.3412	10.7766	10.2845	12.658	9.17964	12.1411	0	0	0	0	10.9936	10.4463	10.416	11.8947	12.719	11.2579	0	11.1432	9.94483	0	10.1214	0	0	0	0
GOLIM4	11.3241	0	11.1818	0	0	0	0	0	0	0	0	0	11.1529	10.8542	11.4199	11.2584	11.3037	11.3118	0	10.6313	10.68	0	0	0	11.5589	11.3644	11.1599	12.1026	10.2957	10.8439	0	0	0	0	0	0	0	0	0	9.94502	10.0013	11.0116	0	0	0	11.3483	11.1308	11.2431	11.3159
GOLT1B	10.1149	7.94251	12.2324	0	0	0	0	0	0	0	0	0	0	0	0	0	0	0	13.5231	0	9.54492	14.0597	0	8.88964	0	0	0	0	0	0	0	0	0	0	0	0	0	0	0	0	0	0	0	0	0	0	0	0	0
GOSR1	11.4326	13.18	12.9555	9.98385	13.2475	12.8363	0	0	0	10.7737	11.1492	9.4116	10.8116	9.93998	10.6929	11.3642	8.84743	10.8175	12.9932	8.43212	10.3134	0	0	0	13.4221	12.7591	10.5145	12.7409	10.1071	12.224	0	0	0	10.2473	13.4495	12.8862	12.0346	13.5427	13.0882	0	0	0	0	0	0	7.7738	10.7258	9.98407	0
GOSR2	10.8234	12.1035	12.0673	10.4087	10.5033	11.3139	0	0	0	11.6865	10.5289	10.3592	12.4455	10.6275	12.2464	12.0564	9.44919	11.8863	13.0205	8.72516	10.0879	0	0	0	13.187	12.503	10.4747	12.2377	10.8427	11.4922	0	0	0	10.9054	11.5415	11.6179	10.547	0	11.714	11.5617	9.35039	11.3305	11.2887	0	10.4565	8.91675	11.7456	11.5786	0
GPKOW	11.894	13.2794	12.382	10.5153	13.6179	13.2826	12.9046	12.0795	11.6067	10.4157	13.3543	11.3537	12.8015	12.8582	12.501	12.5828	11.7912	12.1024	0	11.6138	11.2748	0	12.7751	12.0521	12.5693	11.9147	12.4502	12.7461	13.9979	13.6622	0	0	0	0	13.5696	12.8479	0	11.9129	13.0744	12.2027	12.4104	10.6541	11.8685	0	12.7298	12.6259	12.4909	12.5696	10.9961
GPN1	11.6228	11.9832	10.1789	11.3711	12.5218	10.5665	0	0	0	0	0	0	11.9829	12.7593	12.647	12.1682	13.0455	12.6025	0	11.2335	11.4743	0	0	0	11.3671	12.5513	12.9908	10.2516	12.1159	11.8858	0	0	0	0	12.2871	10.2765	11.2126	11.5051	11.6534	0	12.1796	11.8054	10.7022	12.0883	10.9157	12.515	11.9784	11.9313	12.3488
GRWD1	10.2485	12.561	11.5724	0	13.4307	12.4569	0	0	0	11.359	0	9.83584	0	0	0	0	0	0	0	0	0	0	0	0	13.1748	12.4827	10.4819	12.1433	10.0317	10.865	0	0	0	0	13.3584	12.0045	11.3159	13.2495	12.8208	0	0	0	0	0	0	0	0	0	0
GSK3A	11.1762	9.93656	11.1728	10.4928	10.1261	10.3095	0	0	0	9.34764	10.5454	9.68593	9.9544	12.4577	9.95928	0	0	0	0	10.6556	9.71066	0	10.3113	11.2869	10.1636	11.0307	11.4079	10.9039	11.7957	11.4983	0	0	0	11.1658	9.4886	11.6353	11.8415	10.0988	10.7008	9.22891	9.89271	10.2326	0	0	0	10.3939	10.5902	9.92619	10.4128
GSK3B	12.4773	11.8886	12.9557	12.2741	12.9452	12.6458	0	0	0	12.1637	11.3274	12.4648	11.4504	13.6287	11.6455	10.684	12.2213	11.6645	12.0251	11.2736	10.955	13.0108	11.9276	11.879	13.0081	12.9515	13.5674	11.6082	13.9645	12.8368	0	0	0	12.5464	12.5815	13.0272	13.8446	12.2093	11.8737	12.5636	12.1638	12.2002	11.1434	11.1466	11.2336	12.7322	11.3799	11.1075	12.1802
GSN	14.1178	13.2716	13.2562	13.8446	13.2872	13.1576	13.2307	13.7292	12.9512	14.2546	13.6244	13.7292	12.7689	14.2012	14.0119	13.0863	15.376	14.5469	11.8855	15.5041	14.7706	11.2313	15.1147	14.7718	11.5399	14.0826	15.0334	11.967	14.6886	13.9453	13.6913	13.562	13.7557	12.7655	14.3032	14.2751	12.4175	13.8252	14.1041	13.1649	14.3253	13.4635	14.038	13.3276	13.5869	14.4911	13.0311	13.9803	14.4677
GSTK1	11.9955	14.0909	14.0239	12.4816	14.1332	13.8585	13.1272	11.7734	12.4332	12.8283	11.5235	12.1512	12.4217	13.0478	13.1587	12.2181	12.8331	12.6949	12.347	12.8422	12.4845	12.3543	12.4278	12.7699	13.5993	13.4242	13.1641	14.0018	13.0103	13.6526	0	11.6888	12.0248	12.2814	13.7994	14.1217	12.1882	13.8624	13.7201	13.366	11.4587	12.9658	12.5813	11.4727	12.8137	13.07	12.3342	12.667	12.6063
GTF2F2	12.1223	11.5234	11.2658	12.9004	12.3698	11.7523	10.5141	11.664	11.0374	10.9218	12.6361	11.3426	0	0	0	0	0	0	12.8672	11.6062	10.7791	12.1445	12.446	12.0584	0	0	0	0	0	0	11.8372	12.3595	12.7576	13.2273	12.5884	11.7012	12.1281	12.1703	12.2874	11.0193	11.5864	10.7681	0	0	0	10.218	10.9571	10.5923	0
H1-10	12.6316	13.2729	13.3522	11.4956	11.6904	12.7673	0	0	0	0	0	0	12.3385	11.9347	12.1382	11.9622	12.7699	12.4305	13.5462	10.4784	11.3607	13.8535	8.89545	11.4591	12.7403	12.8278	13.0555	11.9699	12.5767	12.5305	12.5845	14.0451	13.1274	12.9356	13.4969	12.2468	12.9857	13.7365	12.4587	0	0	0	0	0	0	11.9478	12.3381	12.3599	10.3744
HACD3	8.38159	12.1229	11.5979	7.88652	12.2247	11.9873	0	0	0	6.57346	0	6.31218	0	0	0	0	0	0	8.79758	7.745	6.95024	8.26765	6.85169	6.56038	12.7082	10.6697	0	13.342	0	11.5925	0	0	0	10.3085	12.4494	12.5432	8.44783	12.1372	11.3774	8.55905	0	8.28815	0	0	0	0	0	0	0
HADHA	16.3092	16.6105	16.3513	15.4187	16.4642	16.323	14.1457	14.0299	13.8201	13.5123	14.2551	14.3072	14.0679	13.7622	13.63	0	0	0	16.7272	11.9075	13.3158	16.9523	12.8035	13.6459	16.6359	15.5716	12.9881	16.7373	13.6667	15.8361	13.6704	14.3106	14.2529	16.318	16.3281	16.3943	15.9042	15.2999	16.3023	14.9149	14.0469	14.4913	14.3422	14.0955	14.1661	13.6371	14.2759	13.8867	13.6191
HADHB	15.3718	15.3365	15.4258	14.4993	15.0375	15.2042	12.6879	13.0392	12.9692	0	0	0	0	0	0	0	0	0	15.6906	11.2966	13.2715	15.9815	11.2528	12.7496	16.0815	15.0673	12.9666	15.9828	13.1907	15.0076	0	0	0	15.0512	14.4604	15.289	14.9538	14.0754	14.9399	13.7529	12.4253	13.3041	12.9118	12.6438	12.8065	13.0852	13.3888	13.246	0
HCFC1	11.6484	9.00818	11.2515	0	0	0	0	0	0	0	0	0	0	0	0	9.20097	9.77037	9.14034	0	9.13263	9.60589	0	8.57135	9.27912	8.90944	9.83361	10.0809	13.9846	10.049	10.6539	0	0	0	0	0	0	0	0	0	0	0	0	0	0	0	0	0	0	0
HDAC1	13.6246	11.619	12.9164	13.4068	11.047	12.5765	13.4542	13.2071	12.6153	12.0818	12.9726	12.5899	13.1916	13.9242	13.7241	13.2877	14.4094	13.8414	0	11.0296	11.777	0	12.732	11.4674	13.0338	13.941	14.6362	13.0249	14.0421	13.5561	9.86878	12.9598	12.9159	12.148	13.378	11.8956	13.2956	11.3512	13.8388	13.1721	13.5152	13.6107	11.042	12.6481	13.5366	13.7398	13.3548	13.5443	13.0782
HEATR3	11.8167	15.8949	15.7376	12.4679	15.818	15.6408	12.7634	0	10.7788	12.6175	0	13.0551	0	0	0	0	0	0	14.2382	7.33476	11.5974	14.6788	10.4858	11.6487	14.7643	13.5741	8.6786	14.4977	9.05601	13.5542	0	0	0	12.4056	15.4535	15.3767	13.7601	14.7848	14.9627	13.4952	0	12.7973	12.9913	0	12.3306	0	0	0	0
HMGB2	8.92529	14.1182	13.754	0	13.0599	13.5352	13.6836	0	12.5535	13.0615	9.65921	12.9473	10.0405	10.6859	10.7965	11.0704	9.11025	10.7902	0	11.8294	11.1941	0	12.0879	11.8657	8.57958	8.80568	8.32921	9.12258	10.403	9.59513	0	0	0	0	12.8116	13.0286	10.5086	12.5709	12.6396	13.1888	0	12.58	12.7854	0	12.4141	9.26599	9.83348	14.0692	8.84922
HNRNPA0	15.2899	15.5866	14.771	14.7629	15.2633	15.0802	0	0	0	0	0	0	0	0	0	0	0	0	0	0	0	0	0	0	15.0979	14.6809	14.7231	14.7855	14.7566	14.7103	0	0	0	15.5929	14.8899	14.8267	15.1714	14.9747	14.7626	0	0	0	0	0	0	0	0	0	0
HNRNPDL	12.5973	13.6408	13.5451	12.1246	13.5959	13.4537	10.5456	13.185	11.7968	11.2247	12.6485	11.9483	10.8394	13.1248	12.54	11.5192	12.715	12.0304	12.8396	11.6423	10.507	13.1772	11.7188	11.2821	12.5671	12.8708	13.186	13.4153	13.4228	13.6454	12.8649	12.8851	12.6884	10.8421	13.1267	12.753	10.1862	12.9318	13.165	10.5467	12.0366	11.9081	12.1087	11.697	11.7462	12.6304	12.0251	12.203	12.4757
HNRNPM	13.5961	13.9108	14.267	0	0	0	0	0	0	0	0	0	0	0	0	13.9249	13.8573	13.9158	13.7115	13.9032	13.3055	13.9175	13.685	13.8167	14.3719	14.3659	14.4413	14.8968	13.8952	14.5166	0	0	0	0	0	0	0	0	0	0	0	0	0	0	0	13.5488	14.4404	14.0477	0
HNRNPUL2	8.56167	9.81166	9.94306	0	0	0	0	0	0	0	0	0	0	0	0	0	0	0	0	10.1699	9.4225	0	0	0	0	0	0	13.1983	10.5635	11.2743	0	0	0	0	0	0	0	0	0	0	0	0	0	0	0	0	0	0	0
HSD17B11	5.55272	13.9843	13.0825	0	13.9955	13.5511	0	0	0	9.23412	0	9.56137	7.5297	7.57883	6.0737	0	0	0	0	9.19271	9.3539	10.3639	10.2186	9.88638	12.0759	10.3772	0	12.0041	8.47311	11.3014	0	0	0	8.83359	14.1859	13.7672	10.3191	13.3198	13.5166	11.1518	0	9.37502	0	0	0	0	0	0	0
HSD17B12	15.1586	15.3756	14.9271	14.0966	15.2184	15.1102	13.7774	13.4416	13.15	13.5934	13.6638	13.5725	0	0	0	0	0	0	15.6308	11.7703	13.4241	15.7203	12.6276	13.2102	0	0	0	15.4534	12.2799	14.6257	0	0	0	15.0296	15.3968	15.1523	14.6547	14.5201	15.0502	14.6532	13.6592	14.0359	13.8988	13.5823	13.7225	0	0	0	0
HSD17B4	14.6055	15.1448	14.7332	14.3411	15.107	14.7227	13.6071	13.261	13.2717	13.9078	14.095	13.8943	13.4149	13.7485	13.6862	0	0	0	15.2366	13.6545	13.9028	15.5447	13.8969	13.9085	14.6582	14.067	13.2895	13.9068	14.007	14.0239	14.3548	13.2034	13.6541	14.8464	14.9398	14.6102	14.8973	14.2708	14.6078	14.0366	13.7774	13.6761	13.5752	13.6808	13.55	13.9517	12.7716	13.4621	13.5255
HSDL2	14.0246	15.6231	14.9676	14.0842	15.4285	14.9711	0	0	0	0	0	0	0	0	0	0	0	0	0	0	0	0	0	0	0	0	0	0	0	0	0	0	0	14.2618	15.5989	15.0251	14.6858	15.2023	15.083	0	0	0	0	0	0	0	0	0	0
HSPB1	13.3758	15.2879	14.9917	14.4755	14.8493	14.5686	0	0	0	0	0	0	0	0	0	0	0	0	13.9901	14.2423	14.371	0	0	0	15.0762	14.7677	14.6133	14.7046	14.0114	14.5179	0	0	0	14.05	15.4117	15.1983	14.8708	14.7333	14.9559	0	0	0	0	0	0	0	0	0	0
HSPBP1	11.0161	10.098	10.1877	0	9.00889	10.3852	10.9628	11.9578	0	11.6275	11.689	10.1575	0	0	0	10.357	9.55491	11.7214	0	11.9925	10.6553	0	12.9236	12.5495	0	0	0	0	0	0	0	0	0	0	9.57919	10.0088	9.63016	11.7317	11.2773	12.864	11.3156	11.4162	12.8788	11.9802	12.0574	10.7095	12.2072	11.8271	11.4734
HTATIP2	11.9998	11.6115	11.9076	12.1177	11.6444	11.4921	11.2547	0	11.071	12.2947	0	11.0717	0	0	0	0	0	0	0	10.1904	11.1047	0	10.7555	10.3399	10.0169	11.7908	8.81375	12.0849	8.86623	10.817	0	0	0	0	12.8896	12.447	0	12.9428	12.8527	10.7776	0	11.1736	11.4362	0	10.8508	0	0	0	0
HTATSF1	13.5087	13.7595	13.2992	13.4301	11.4831	12.6825	6.20992	12.1296	10.2939	0	13.6891	10.3121	13.896	13.6566	13.5565	14.0503	12.7358	13.5216	13.2032	12.3846	12.2561	13.8383	12.6211	12.259	13.91	13.7964	13.8189	10.8132	13.8661	12.7391	13.0873	13.3235	13.4114	12.9265	12.7957	13.2061	14.3608	9.02411	11.9434	8.96499	12.8767	10.442	7.91913	12.9867	9.88314	13.0723	14.0246	13.6742	12.9022
ILKAP	10.9363	12.3514	11.6226	8.82015	12.2622	11.9336	0	0	0	9.49382	11.7094	9.60101	12.0695	12.5197	12.1285	12.3031	10.8349	11.4913	9.93304	9.28959	9.40465	11.5196	10.5845	9.66406	10.9259	11.7011	12.1534	9.50386	12.8136	12.0719	11.799	10.5109	10.6025	0	12.1747	11.6839	8.62359	11.6319	11.9808	8.60402	10.9893	9.91017	9.39366	10.6983	9.47799	12.1958	13.0972	12.5274	10.6237
IMMT	3.05778	7.87719	3.76362	0	12.7481	11.8248	0	0	0	13.3831	0	13.2418	0	0	0	0	0	0	0	7.5263	4.09608	0	5.65479	9.03293	0	0	0	16.1814	8.6248	14.528	0	10.6108	6.81061	0	13.7582	13.4297	2.29581	15.6412	15.2625	11.3425	0	10.2832	9.78957	0	6.9329	2.39782	8.74147	7.31868	0
IPO4	14.307	15.9941	15.8257	13.5656	15.8806	15.9441	13.4617	12.2507	11.7718	12.567	3.9644	13.1571	12.3397	4.85097	4.42626	12.5027	11.9067	12.3035	15.4095	8.23156	12.7101	15.6699	11.388	12.7126	16.4723	15.0211	7.5484	15.6568	10.9723	14.381	0	0	0	14.1957	15.7015	15.9413	14.6694	15.1778	15.3928	14.3299	13.8853	13.7087	13.9853	8.13296	13.2415	12.5912	12.6043	12.4129	12.159
IPO5	14.3945	16.4928	16.2456	14.1573	16.3037	16.2222	0	0	0	13.925	13.4707	13.9264	0	0	0	0	0	0	15.6682	13.1981	13.7268	15.8469	13.8338	13.8439	16.6524	15.5729	12.9419	16.1285	12.5727	15.1698	0	0	0	13.8244	16.2253	16.3382	14.5331	15.7196	15.6412	14.8988	13.3142	14.4848	14.6062	13.4055	14.3475	0	0	0	0
IPO7	16.3974	18.0559	18.0479	16.4982	17.7681	17.6432	16.5182	14.1114	15.8199	16.6082	14.0507	16.0525	0	0	0	0	0	0	17.1994	11.9967	14.6031	17.161	12.6689	13.8745	18.3098	17.0983	13.5527	17.6049	12.7493	16.5889	0	0	0	17.0078	17.7714	17.8598	17.3094	17.1003	17.0483	16.7656	12.7304	16.303	15.9644	14.6372	16.166	0	0	0	0
IPO8	11.6383	13.1864	13.2899	11.2179	13.4312	13.6079	8.7788	8.27216	8.85983	7.886	0	6.61643	8.53765	10.9108	10.2467	8.13217	9.98185	9.32833	11.6048	6.85519	7.53089	11.6124	8.02339	7.54971	13.5979	12.4501	10.3685	12.8217	10.8087	11.801	0	8.52883	8.76944	11.4614	13.7109	13.7206	12.5771	13.1727	13.531	9.08521	9.39132	10.2516	6.3884	8.65005	8.9138	9.49305	8.33476	7.47098	7.39077
IPO9	14.9869	15.8644	15.9455	15.3345	15.6187	15.5797	15.4996	9.33676	14.5901	0	0	0	0	0	0	0	0	0	15.2883	12.7329	13.3231	14.9115	13.2548	13.4169	16.6657	15.5074	11.9762	16.178	11.1072	15.0502	0	0	0	15.7707	16.1875	16.1999	16.0764	15.1878	15.5259	15.7852	10.077	15.436	15.0429	11.8115	14.9311	0	0	0	0
IQGAP1	9.76195	13.4827	13.0661	12.9263	12.8624	13.1234	13.394	8.74212	12.1821	13.5773	9.22225	13.3526	10.4348	11.0789	9.95549	10.8652	10.8501	10.7063	12.9078	13.3341	13.0718	13.5814	13.3841	13.6395	14.8983	13.5993	11.0078	14.7381	10.9061	13.7364	0	0	0	13.1101	12.5041	13.2442	13.37	11.5155	12.8224	13.5848	7.51246	13.1762	14.0907	10.6429	13.9138	8.75193	9.17591	9.72163	8.69361
KHSRP	9.56312	9.5872	11.5553	8.94658	5.79937	10.065	0	0	0	7.08767	10.4085	7.15603	12.6183	13.4589	12.9509	10.898	14.1002	12.9268	0	0	0	9.00599	6.53612	10.3754	12.402	13.5381	14.1906	16.3682	13.8543	15.3925	11.6978	14.8952	14.0478	0	12.7007	8.6862	8.805	9.23794	7.00123	0	0	0	0	0	0	12.4049	14.8683	14.154	12.4179
KIF5B	12.4509	10.6944	11.7957	12.7324	11.3122	11.097	12.1549	11.4867	11.3378	11.5698	12.4878	11.975	12.5958	11.291	12.046	12.6601	10.4489	11.7328	8.50526	12.734	12.0398	9.7473	13.8096	13.6395	10.2063	10.5412	9.90194	9.273	10.679	9.94818	0	12.9143	12.6448	12.208	11.9937	12.2981	11.85	12.2407	11.9007	12.5673	11.7904	12.1577	13.4776	10.3899	12.6663	11.3363	11.8902	11.7541	10.5792
KLC4	14.404	11.8188	14.1077	13.772	0	12.4044	0	0	0	0	0	0	14.5746	12.846	13.6891	13.9329	13.2998	13.5387	0	0	0	0	0	0	0	0	0	0	12.964	13.4121	0	14.7997	14.9715	0	0	0	0	0	0	0	0	0	0	0	0	13.4444	14.7237	14.3749	13.1977
KLHDC4	9.33651	10.1774	9.50013	0	10.5916	10.247	0	0	0	9.2642	0	10.0072	12.298	10.2613	11.2875	11.7656	10.9259	11.2174	0	0	0	0	10.6218	9.17817	0	9.18347	9.8157	0	0	0	0	12.0176	10.9709	0	11.044	9.40982	10.6549	12.0107	9.87543	9.94596	0	8.86254	9.77222	10.2051	5.64933	8.26242	12.108	10.9624	8.48466
KPNA2	15.505	15.629	15.4824	14.9697	15.717	15.7555	0	0	0	0	0	0	15.3616	15.5193	15.4694	15.5728	15.7079	15.6412	0	0	0	0	0	0	0	0	0	15.118	15.5305	15.4064	0	0	0	0	0	0	0	0	0	15.3737	15.3111	15.0187	0	0	0	0	0	0	0
KPNB1	14.5168	17.0411	16.9855	15.6188	17.119	16.9311	15.8585	13.2577	15.26	15.5625	13.1376	15.6268	0	0	0	0	0	0	16.3618	15.0406	15.1012	16.6555	15.8252	15.6186	17.2823	16.3904	14.7701	16.7968	13.8984	15.9207	0	0	0	15.0128	17.5732	17.1933	16.0175	17.0226	16.7429	16.173	13.5248	15.4816	16.206	13.5847	15.7275	0	0	0	0
KRAS	22.301	21.2213	21.8317	21.9984	20.5206	20.8077	20.4569	19.8701	21.1663	18.8465	20.0103	20.4861	19.242	18.1931	18.5905	18.2753	18.4398	18.3306	23.8657	17.6644	21.1442	24.0431	17.0204	19.9461	22.7138	22.3094	19.4701	21.6278	18.9911	21.1096	19.7305	19.0747	19.1354	23.1713	20.3766	20.8367	22.6647	19.6501	20.264	20.3829	18.8966	20.3167	19.8342	20.3884	20.201	18.2934	18.2394	18.2648	18.7463
LAMC1	12.5181	14.7188	14.2617	0	0	0	0	0	0	15.5448	13.6896	15.7316	12.7124	13.601	13.2763	14.1439	12.9506	13.6311	0	0	0	0	15.5472	14.1217	0	0	0	14.2827	13.2113	0	0	0	0	0	15.4226	14.7749	0	15.7205	15.1746	14.9835	13.5183	14.6309	15.1325	0	14.4937	0	0	0	0
LARP1	10.0974	12.266	11.9545	9.94574	12.2289	12.0168	0	0	0	11.9201	10.8132	9.75485	11.8107	10.9288	10.012	11.5363	10.7959	11.5768	9.93176	11.5377	10.8493	10.8158	12.3623	12.0396	12.5194	11.7744	11.4719	11.8697	11.3426	11.726	0	0	0	11.8121	11.6676	11.9224	11.8821	11.5258	10.6866	12.6253	0	11.3257	12.1571	0	11.6612	10.0526	11.4915	7.91719	0
LARP4	11.8789	11.7651	12.007	11.4207	12.2213	11.4224	12.1876	12.0054	12.3879	0	0	0	11.9243	11.2589	11.9267	11.4026	11.7747	11.8189	0	0	0	0	0	0	0	0	0	10.8939	11.8512	10.3724	0	0	0	11.6284	12.5316	11.2214	0	12.9898	11.9397	0	0	0	0	0	0	11.8263	11.8752	11.9382	0
LEO1	11.5855	10.9998	11.4522	11.0984	12.5742	11.1444	10.1549	11.4344	11.0121	10.1398	10.7098	10.4711	12.4801	12.8558	12.6165	11.9268	10.5062	11.1743	0	11.6033	11.4893	12.8627	11.4984	10.2338	12.9759	12.3071	11.7718	11.7448	12.7609	12.7437	0	11.9639	11.3384	0	12.8565	12.1879	10.632	11.9568	11.3016	0	0	0	9.11628	11.143	10.5196	12.2287	12.5433	12.8774	11.9832
LETM1	9.58678	11.4841	11.4501	0	11.9122	11.8788	0	0	0	11.4129	0	12.2302	0	0	0	0	0	0	0	0	0	0	9.42122	9.95225	12.7691	10.2862	0	14.4656	0	12.7693	0	0	0	0	13.561	13.3663	0	13.6946	14.0262	12.0554	0	10.4604	0	0	0	0	0	0	0
LIMA1	11.4791	11.8033	11.0722	0	13.0428	12.319	14.9852	12.2887	14.3683	15.4914	11.1834	14.9077	12.5339	13.7813	13.5169	13.1644	13.8801	13.5561	10.2291	16.1039	15.7669	9.90552	14.9486	14.6991	7.16993	13.3174	14.0286	10.7677	14.144	13.2925	11.8492	13.4265	13.4427	0	13.4264	12.5474	9.09326	14.2519	13.6683	14.9958	13.7431	14.6857	14.5088	11.2607	14.4277	14.0181	13.0217	13.7438	13.7472
LIN7C	11.5295	11.7022	11.2039	10.6878	12.1341	11.2338	8.31859	11.7975	10.5045	11.1547	11.9982	11.2235	12.7951	12.3817	12.7315	10.8433	11.2447	11.4378	11.0629	12.8061	12.5497	0	12.9883	12.786	13.1225	12.6103	12.0672	12.1956	12.4042	12.5085	11.6744	12.5579	12.9896	0	0	0	0	13.9502	13.1681	0	0	0	0	0	0	11.9601	13.1337	12.8594	11.1328
LMAN2	8.14394	11.0988	11.3909	0	12.2291	11.1988	0	0	0	9.99937	0	10.1931	0	0	0	10.5053	11.4617	10.7105	0	11.0378	10.3498	0	10.6482	10.0159	11.6957	11.6737	12.1224	13.3075	11.0969	11.1597	0	0	0	0	12.828	12.4343	0	13.0248	13.0902	0	0	0	0	0	0	0	0	0	0
LMO7	13.1827	11.488	12.8244	10.8636	10.811	12.9435	12.1858	14.1304	13.0499	13.884	14.8105	14.2205	13.9233	13.6991	13.788	13.8961	14.0811	14.011	0	12.2555	12.2189	0	0	0	11.352	12.6313	13.0565	12.9895	13.9204	13.6312	13.7611	13.5392	13.6779	0	0	0	11.9014	14.9213	14.7212	14.385	14.5991	14.3513	13.7707	14.3275	13.1115	13.7337	14.0926	14.0166	13.6693
LRP5	12.0803	13.4547	13.2982	10.7331	13.0137	13.3136	0	0	0	0	0	0	14.1142	11.8696	13.2852	13.1716	11.3581	12.4601	0	12.0897	11.0086	0	0	0	0	0	0	0	0	0	0	12.8714	12.1753	0	0	0	0	0	0	0	0	0	0	0	0	0	0	0	11.7853
LRPAP1	12.6658	13.7094	13.61	0	0	0	0	0	0	0	0	0	0	0	0	0	0	0	0	0	0	0	0	0	0	0	0	0	0	0	0	0	0	0	0	0	0	0	0	0	0	0	0	0	0	0	0	0	0
LSM14A	10.7996	11.5204	12.4927	11.289	12.4086	11.6922	10.7086	0	9.95109	12.1914	10.5779	11.0424	11.4232	11.5523	10.885	11.6578	12.1727	11.8202	11.2444	11.2736	10.8502	0	10.8635	8.61916	11.7872	11.656	11.7759	10.9383	11.9703	11.8225	0	11.2584	10.6721	12.2868	12.173	10.9882	12.2377	12.9409	12.0113	0	0	0	7.64976	0	10.3333	11.1886	11.1468	10.5437	10.1499
LSM14B	11.9515	11.7769	12.4083	11.7785	12.5405	11.8558	12.0993	0	11.2343	11.8617	10.4587	8.73023	11.5433	11.2302	11.3929	11.4501	11.2329	11.6889	11.228	11.9771	11.6613	10.4423	10.8903	11.6717	11.7798	11.839	11.6614	11.9213	11.7111	11.962	0	0	0	12.7103	12.3188	11.85	12.6691	13.0551	12.6849	0	10.6189	11.8359	10.9317	10.702	11.7489	10.8661	11.4747	11.3332	10.5675
LSM4	13.1105	14.1723	13.4262	13.1003	14.39	13.9555	11.3726	11.2807	10.8743	12.0345	12.1717	11.935	12.6298	12.7344	12.8218	12.5306	12.838	12.4782	10.8899	11.84	11.4393	12.0134	12.8728	12.1992	12.2009	12.751	13.0882	12.3673	13.5828	13.2189	0	12.1996	11.752	12.001	14.2589	13.2164	12.3929	14.4593	12.6962	11.4961	12.5576	11.6163	12.3695	0	11.5338	12.8713	13.0936	13.1715	12.307
LSM6	11.9157	11.7869	11.2501	11.6841	0	11.6262	0	0	0	0	0	0	11.8645	11.6098	11.9859	10.5512	11.2079	10.9701	0	0	0	0	0	0	11.7237	11.5832	11.2248	11.5505	11.6469	11.6475	0	11.5433	11.1866	0	11.5441	11.3768	0	10.9742	11.0353	0	0	0	0	0	0	11.7298	12.3928	11.6411	11.5231
LTA4H	13.5932	0	9.39789	12.8434	7.98373	8.83577	11.1656	0	9.41418	0	0	0	0	0	0	0	0	0	12.2285	11.2961	10.2578	0	14.4562	13.0841	0	0	0	0	0	0	0	0	0	0	0	0	12.8888	12.7943	11.1745	10.2402	0	9.52265	13.5441	0	11.2288	0	0	0	0
LUC7L2	12.7773	14.656	14.7727	0	0	0	0	0	0	0	0	0	0	0	0	0	0	0	0	0	0	0	0	0	0	0	0	0	0	0	0	0	0	0	0	0	0	0	0	14.1334	13.2359	13.857	14.0277	12.5581	13.8114	0	0	0	0
MANF	12.7667	10.8557	12.1399	13.0813	11.2844	11.4152	10.8727	13.0789	11.8074	0	0	0	12.4878	11.6917	11.7647	11.9992	11.127	11.474	0	11.0033	11.1147	0	0	0	12.1132	11.8142	10.8833	12.0425	11.0604	11.3411	0	12.4086	12.4912	12.7786	0	11.4319	11.9908	10.025	10.6813	10.0185	12.0419	11.3654	0	12.1507	10.4667	11.8118	12.8272	12.197	11.0985
MAP7	12.1586	11.8596	11.6058	12.5516	12.3632	11.6373	0	0	0	0	0	0	11.6851	0	10.7463	0	0	0	0	0	0	12.5411	0	11.2466	0	0	0	0	0	0	0	0	0	12.6729	12.2368	11.7523	12.8152	11.4589	11.5658	0	0	0	0	0	0	0	11.2441	11.2691	0
MARK2	10.9534	10.7979	9.33711	11.2155	11.3952	10.3095	0	0	0	0	0	0	10.0966	9.63929	9.19599	0	0	0	0	0	0	0	0	0	9.67775	9.76426	9.73067	0	0	0	0	0	0	10.5756	11.2816	10.3898	11.4525	10.5216	10.364	0	0	0	0	0	0	0	0	0	0
MARS1	11.6079	13.1954	13.5132	11.4918	13.5195	13.7239	0	0	0	0	0	0	0	0	0	0	0	0	0	0	0	0	0	0	0	0	0	0	0	0	0	0	0	0	0	0	0	0	0	0	0	0	0	0	0	0	0	0	0
MCTS1	8.22843	13.42	12.7608	8.19037	12.826	13.2217	12.2627	0	10.0792	10.966	0	12.5067	0	0	0	11.1425	11.6602	10.7482	10.5121	11.2269	9.05496	9.34964	12.1297	11.615	8.95565	8.801	10.6246	11.8175	11.5002	11.6857	0	0	0	0	12.955	13.2	8.85309	11.517	12.1847	11.0776	9.03194	11.5122	11.9853	9.30266	11.2338	8.06786	10.9164	10.5676	0
MDH2	16.948	16.7164	16.8157	17.3255	16.4629	17.1062	17.0995	16.9051	16.8542	16.1997	16.4795	16.4503	16.0406	16.4669	16.2875	16.0939	16.6175	16.3202	17.1658	16.1487	16.3685	17.4253	16.4054	16.4553	16.7765	16.6805	16.6927	18.0867	16.5789	17.5559	17.0444	16.4957	16.4077	16.8256	16.1618	16.6922	16.5773	15.6272	16.2174	17.1024	16.7881	16.7446	16.6676	16.3288	16.766	16.7348	16.389	16.5886	16.8093
MDN1	13.36	14.1984	13.6498	0	14.4876	13.5853	0	0	0	13.6768	0	12.5863	14.0793	13.4132	13.601	14.1806	14.0852	12.8115	13.3846	12.8193	13.9824	0	0	0	13.1682	12.8625	13.8604	13.5613	13.4326	12.8314	0	0	0	13.7194	14.4079	13.6371	12.7555	14.3842	14.1354	13.3042	13.4119	12.7494	0	0	0	12.9083	14.127	12.7669	13.6843
METAP1	11.0224	11.4802	12.4508	12.3868	11.4196	12.0372	0	0	0	12.5857	0	10.6591	0	0	0	12.4145	12.5241	11.7602	13.0462	5.92773	7.00349	12.2786	9.083	10.1494	11.446	11.3488	11.686	11.7757	12.2733	9.70651	0	0	0	9.59218	11.4948	11.6645	10.7732	12.74	10.3216	9.58841	10.138	9.92954	8.60766	10.7315	12.999	0	0	0	0
METAP2	15.0176	14.8723	14.7386	11.9031	15.1286	14.3361	14.2175	0	13.1809	14.2688	10.7968	14.8704	0	12.4754	10.7416	10.6471	13.2369	0	11.711	13.0442	12.5059	12.1432	13.8044	13.1069	12.9351	12.4852	12.4224	12.5796	13.1644	13.1085	0	0	0	11.6359	15.3035	14.0826	12.6413	14.3171	14.5672	14.6128	0	14.3019	14.209	12.5825	13.625	0	0	0	0
MFAP1	10.8555	12.8675	12.6956	0	0	0	0	0	0	0	12.3344	10.0412	12.4585	11.0777	12.1681	12.6867	0	11.5726	0	0	0	12.9344	9.18175	9.56552	12.425	11.574	10.0205	7.68608	10.7742	10.8651	12.3181	10.7921	10.8545	0	11.1874	12.3059	11.8667	10.5556	10.1129	0	0	0	9.68589	11.6536	9.41372	9.68321	11.2043	10.5992	0
MOB4	10.7423	10.4097	9.89981	10.5989	11.16	10.3805	0	0	0	0	0	0	0	11.5613	10.2189	0	0	0	0	0	0	0	0	0	9.76117	10.6182	11.4074	9.47625	10.8843	10.4116	0	0	0	0	10.8903	9.87341	9.99294	11.8751	11.4602	11.1403	0	10.7591	11.4772	0	10.5043	0	0	0	0
MOGS	10.5635	13.0487	12.5898	0	12.0664	12.328	0	0	0	9.66671	0	9.4581	7.29591	9.49818	9.48423	0	0	0	0	0	0	11.3352	9.91616	7.67874	11.6392	10.1605	8.61949	12.2625	10.3786	11.0504	0	0	0	9.50823	12.6186	13.077	10.854	11.286	11.8008	0	0	0	9.70856	0	8.1515	0	0	0	0
MRPS7	11.4612	11.6533	11.6358	0	11.9653	11.8665	0	0	0	9.60975	0	11.7514	12.1537	11.4087	11.9149	12.3973	9.76668	11.8357	0	0	0	0	0	0	9.86364	10.4779	10.741	13.5244	11.5903	12.6263	9.98114	11.8546	11.973	0	12.3938	13.1064	10.998	13.4819	13.7142	11.349	0	10.3861	8.95918	11.5869	9.86274	9.5772	13.4662	12.457	10.7951
MRRF	12.3223	12.2667	12.307	10.792	11.4957	11.9753	10.4977	10.7418	9.63813	10.0607	10.5449	11.1826	11.2085	11.0184	11.1076	11.6744	9.71552	11.2542	11.4054	0	9.38074	11.3157	9.19922	9.43993	11.7139	11.1999	10.9302	11.2471	11.4116	11.2368	0	12.6099	10.9907	11.8497	9.9187	12.0148	11.1625	10.686	10.5669	10.7819	11.1812	11.4685	10.324	10.0475	10.7263	9.10796	11.9231	11.2434	9.46565
MTA2	15.1066	12.8069	13.985	14.7431	13.7885	13.753	12.1105	14.6452	12.4886	14.2538	13.8391	12.7413	13.9821	14.7696	14.8005	13.4612	15.8912	15.1123	0	0	0	0	0	0	12.1547	14.7739	15.5647	13.5412	14.7346	14.7015	0	14.8234	14.2458	13.7961	14.1771	13.7197	14.1381	13.5129	13.9741	13.0289	14.8346	13.6021	0	0	0	14.7709	14.64	14.687	14.5763
MTDH	13.3995	13.0773	13.4677	11.0349	12.795	13.5444	11.4669	11.9585	10.6711	10.6357	11.4015	11.6327	12.619	12.6862	12.1764	12.3366	10.9644	12.2814	13.8915	8.88632	10.3415	13.223	9.72642	10.499	12.8735	12.4893	11.7356	12.6178	12.5338	12.6987	0	13.2929	13.2141	12.856	12.0217	12.5327	12.8954	11.5228	11.5792	11.8525	11.4061	11.4497	9.76749	11.948	10.1456	11.8555	12.8522	12.5766	9.84714
MTHFD2	11.9212	12.8491	11.5059	11.8474	13.15	12.7438	0	0	0	0	0	0	11.373	11.8538	11.8599	11.5687	10.7934	10.8179	0	0	0	0	0	0	11.6134	11.2101	11.502	9.69014	12.5591	10.4454	0	11.6323	12.1489	10.4088	12.7776	11.4656	12.0338	11.9994	11.6055	0	0	0	0	0	0	12.3635	11.7453	11.338	11.7678
MYO1D	9.92671	13.1234	12.7429	9.32992	14.7075	14.4441	13.649	11.0704	12.2216	14.4178	8.90275	13.8593	8.62976	11.2623	10.3393	11.105	4.62205	9.52991	0	14.443	14.0837	11.2043	13.8004	13.6117	12.7501	11.1139	10.8155	14.1587	11.8848	13.3819	12.0406	10.9614	11.6081	10.5226	14.3101	14.3525	10.0771	15.6061	15.1323	14.8757	9.28589	14.4193	13.2681	0	12.8389	8.34578	10.9643	10.1829	0
NAMPT	10.6623	11.2447	11.149	10.5085	11.3448	11.6474	12.1461	0	10.1221	9.19777	0	11.171	11.418	9.75443	10.2047	11.7607	11.9213	11.6622	0	12.39	11.4541	0	12.7606	12.8053	10.2232	11.1725	11.7693	9.89371	9.81813	9.63473	0	0	0	0	10.6071	11.7733	10.8437	9.36616	10.7353	12.0188	0	11.259	12.4095	0	12.4209	8.04551	11.4935	10.9804	8.69209
NAP1L1	14.9203	15.1048	14.8679	14.6582	15.8415	15.5625	0	0	0	0	0	0	0	0	0	0	0	0	0	0	0	0	0	0	16.1196	15.332	13.9821	0	0	0	0	0	0	14.4026	16.0405	15.8298	14.7823	15.3752	15.4531	11.6409	0	9.8523	12.4697	0	10.3665	0	0	0	0
NAP1L4	14.4125	15.8674	16.0579	14.3403	15.6472	15.5107	0	0	0	0	0	0	0	0	0	0	0	0	0	0	0	15.3383	14.7969	14.8024	0	0	0	0	0	0	0	0	0	14.2377	15.3998	15.7633	0	0	0	0	0	0	15.0119	14.4272	14.8034	0	0	0	0
NCL	17.0375	18.52	18.5374	16.8732	18.1313	18.1951	17.1557	16.4482	16.7673	17.1886	16.4792	16.9439	0	0	0	0	0	0	0	0	0	0	0	0	0	0	0	0	0	0	0	0	0	17.118	17.8543	17.9522	16.9385	17.5291	17.3383	0	0	0	0	0	0	0	0	0	0
NDUFAF2	8.90488	13.7127	12.7656	0	12.0001	12.2236	0	0	0	0	10.8924	8.59135	14.3219	12.9323	14.0814	13.0205	9.13272	11.713	0	0	0	0	0	0	14.2988	13.7347	12.2901	10.2203	12.2477	11.6797	0	13.0871	12.3551	0	13.3582	11.6964	9.10392	12.9195	13.4898	0	0	0	0	0	0	11.4266	13.3653	12.2912	9.47248
NELFA	11.9981	12.3017	12.5436	0	11.9524	13.2937	0	0	0	0	0	0	10.8961	11.2682	10.415	10.4831	11.2157	10.8451	0	10.8045	9.7226	0	10.1902	10.5222	0	0	0	11.2128	11.3136	11.7809	0	0	0	10.1653	11.5553	12.8246	11.3484	11.5064	10.7374	10.4699	10.824	10.7355	0	0	0	10.5961	11.4481	10.6461	0
NELFCD	12.1658	13.0638	12.1459	11.7923	13.8	13.4574	0	0	0	11.2727	10.9597	9.44795	0	11.3386	9.50625	9.41895	10.631	9.19994	11.3323	11.0883	11.4059	0	9.83135	9.22539	9.094	10.4282	10.7423	11.6655	10.8307	11.6494	0	0	0	0	12.984	11.779	10.5039	12.8558	11.6761	5.44979	11.8502	10.2251	0	0	0	0	0	0	0
NF1	10.1099	12.9999	12.1635	0	11.7182	11.5846	0	0	0	0	0	0	0	0	0	0	0	0	0	0	0	0	0	0	13.2493	10.7516	0	11.9229	0	10.153	0	0	0	0	10.764	10.8636	10.4742	9.038	9.95514	0	0	0	0	0	0	0	0	0	0
NIPSNAP1	11.4266	10.9376	12.255	0	10.9568	10.6947	0	0	0	12.2151	0	11.3257	13.3872	10.9344	12.355	12.9104	0	12.3673	12.5996	0	10.9501	13.0983	11.2792	11.4773	13.4932	12.944	11.9504	13.3752	11.5185	12.369	11.2045	12.5955	12.6934	0	11.4609	12.611	0	12.6706	11.3497	0	0	0	0	0	0	12.0832	12.5388	12.3397	11.2209
NOLC1	12.1724	14.956	14.3952	12.0934	15.221	14.7852	12.1199	12.2761	12.1095	13.6587	12.3544	13.3232	12.7123	10.901	10.1292	12.0601	11.047	12.0283	12.6183	12.3279	11.9706	13.471	12.7165	12.1825	12.3568	11.8235	10.1807	13.1837	11.5359	12.4337	11.6781	12.1318	11.7255	13.3617	14.9204	14.2587	13.1578	14.8307	14.1807	11.3791	11.5515	11.7704	11.9626	11.5306	11.7667	10.9907	12.0228	11.8955	11.1617
NOMO2	10.36	10.8147	8.84829	10.6702	11.0789	9.65256	0	0	0	11.3574	10.823	9.71791	10.4237	11.0403	10.9599	10.9101	11.3207	11.1287	0	10.3825	10.2651	0	0	0	10.151	10.2725	10.0163	13.9689	9.19057	11.6561	0	0	0	0	11.2196	9.77344	10.5395	11.5203	11.3794	10.4118	0	10.4946	9.81942	0	9.95134	0	0	0	0
NOP14	10.7788	13.7981	13.2532	9.89083	12.0498	12.7571	13.1243	0	11.8706	0	0	0	10.8334	9.75842	9.91387	10.6267	10.1062	9.72445	11.4484	11.0733	11.3729	12.1969	12.8404	11.852	12.3482	11.9328	11.0751	11.97	10.7546	11.8519	0	0	0	0	11.9983	12.8828	10.0917	10.2055	11.5713	12.4168	0	11.946	13.0362	0	12.7566	0	0	0	0
NOP2	10.6	11.9054	12.6343	9.10669	12.031	11.6749	0	0	0	0	0	0	13.3522	10.2678	11.4373	13.37	9.00762	12.1752	10.0067	10.5564	10.8357	12.1823	7.3831	10.7652	12.6546	11.7316	11.5619	14.3466	11.9722	13.3721	11.6441	13.9695	12.827	0	11.1475	11.2388	10.636	9.90122	10.1364	0	0	0	0	0	0	8.8041	14.0242	12.4619	7.76142
NOP56	9.14416	12.3177	11.8151	0	11.5124	12.0239	0	0	0	0	0	0	0	0	0	11.0185	0	9.23744	0	0	0	11.5264	7.36041	10.0285	12.3176	11.434	0	13.3885	9.0416	12.2279	0	0	0	0	11.5122	11.542	10.681	8.68463	9.76591	9.50547	0	8.86481	0	0	0	9.12039	10.9406	10.4796	0
NOP58	10.7343	14.2464	14.1092	10.2797	13.3523	13.6342	8.84108	0	8.51235	9.11615	0	8.6927	9.56168	9.29511	9.49317	11.0095	7.90803	10.0562	13.1405	8.09154	10.149	13.6292	9.36549	10.3284	14.3094	13.0827	8.85109	14.0291	10.4672	12.9333	0	0	0	11.7488	13.6719	13.8425	12.7808	12.0501	12.7624	10.2529	0	9.46387	10.0926	0	8.31922	5.82538	11.0207	10.5923	7.72253
NOP9	6.7202	13.5516	13.9379	5.54117	12.8763	13.2612	0	0	0	0	0	0	0	0	0	0	0	0	0	0	0	0	0	0	13.6896	11.2758	0	12.6584	4.88852	11.1319	0	0	0	7.30305	12.4949	13.4541	10.9002	10.9063	11.053	8.02777	0	7.81925	0	0	0	0	0	0	0
NOSIP	11.7195	11.7346	11.7369	11.9856	12.2986	12.0826	0	0	0	11.9753	10.617	10.9984	0	9.95369	9.73691	0	0	0	0	0	0	0	0	0	9.8925	9.86859	9.81685	10.472	10.4312	10.7082	0	0	0	0	11.714	11.1942	0	12.0305	11.7766	0	0	0	11.0656	10.3842	10.5307	10.8013	9.59988	8.60759	0
NPM1	16.9921	18.239	17.5471	0	0	0	0	0	0	0	0	0	0	0	0	0	0	0	0	0	0	0	0	0	0	0	0	0	0	0	0	0	0	0	0	0	0	0	0	0	0	0	0	0	0	0	0	0	0
NTPCR	11.5591	9.90728	12.3143	0	9.59105	12.1794	0	0	0	0	0	0	10.34	10.5068	9.82622	0	0	0	0	0	0	0	0	0	9.37723	9.03025	9.39182	11.5652	11.1547	11.7235	0	0	0	0	0	0	0	0	0	0	0	0	0	0	0	9.28057	9.63895	8.33128	0
NUDCD1	13.8065	13.6542	13.6381	14.9353	11.5347	12.8613	12.7169	12.1974	12.6138	10.9241	12.2678	10.8682	10.1886	13.7172	12.8974	10.9878	11.557	10.5195	14.0868	13.6018	13.6017	14.7239	13.1054	13.0741	15.8508	14.7677	13.1494	14.2588	14.4803	14.1947	8.90584	9.67849	9.95662	13.8869	12.9621	13.3069	15.3539	10.5369	12.598	12.458	12.006	12.1278	12.0142	11.8191	12.0541	13.8177	9.50145	12.835	13.5795
NUFIP2	11.0398	8.39793	9.9806	0	0	0	0	0	0	0	0	0	0	0	0	0	0	0	10.7901	8.95552	8.6057	0	0	0	10.1797	8.53966	9.13287	8.63988	8.77734	10.0375	0	0	0	0	0	0	0	0	0	0	0	0	0	0	0	8.79451	8.78658	11.6612	0
NUP107	10.008	11.8138	11.3909	0	11.8501	11.8255	0	0	0	0	0	0	10.4062	10.1162	10.6289	9.69766	12.8014	10.8317	0	0	0	0	0	0	11.064	12.009	12.614	11.9675	11.2462	11.6288	0	0	0	0	10.5541	10.6712	11.8091	11.5722	11.5401	0	0	0	0	0	0	10.9854	10.8448	11.0877	0
NUP205	13.6247	11.7831	12.6933	12.6148	13.603	11.0895	0	0	0	0	0	0	0	0	0	0	0	0	0	0	0	0	12.4565	11.7593	0	0	0	16.0112	9.35001	13.2496	0	0	0	0	10.8812	11.8596	12.7134	10.8379	12.0231	0	13.7476	11.7033	11.0211	12.8797	10.3263	0	0	0	0
NUP43	10.7333	11.9307	11.876	10.2802	11.6005	11.7274	0	0	0	11.8663	0	9.48123	9.38001	10.5658	10.3721	10.1944	12.5901	11.4346	11.2348	9.76827	9.97485	10.8448	10.5641	11.2859	12.0199	12.4465	12.9886	13.584	12.1706	12.7808	0	0	0	0	11.5826	11.8207	11.8095	12.4584	11.2502	8.72045	0	10.3979	10.5448	0	9.94067	0	0	0	0
NXF1	9.17295	11.1229	12.0531	0	11.0315	11.0375	0	0	0	0	0	0	10.0187	11.0835	10.9576	0	0	0	0	0	0	0	11.6869	10.7234	11.5089	11.2561	10.8715	11.1598	11.5472	11.458	0	0	0	0	10.9738	12.1965	11.253	11.7261	10.6665	10.7958	0	10.8393	0	0	0	10.6017	11.0101	10.4951	0
OLA1	10.8068	14.8871	14.6564	12.7765	13.9182	14.5934	13.9462	0	12.9243	12.9491	9.0086	12.5648	9.46794	11.1275	10.4549	10.7485	11.8169	11.6996	11.9283	13.5042	13.182	10.7932	14.0335	13.9622	13.2747	12.0018	11.249	12.4837	9.61987	11.7214	0	0	0	9.01869	13.5476	14.2397	11.4407	13.4223	13.5775	12.4821	10.0074	13.2448	13.7706	0	13.5655	11.5865	10.1344	10.6374	11.0369
PAF1	12.2785	12.769	12.4758	10.7211	12.5187	12.443	11.1779	11.9686	11.5652	10.7537	11.0761	11.4676	12.9025	13.0198	12.7692	12.5751	10.1369	11.8753	11.6776	12.1009	11.902	10.8622	12.128	11.6429	12.4362	11.9121	11.8298	12.1508	12.7537	12.6079	0	12.5363	11.8489	0	10.8313	12.4158	8.71596	12.628	12.0313	9.81271	10.0649	11.2949	10.2984	11.7643	10.1948	12.3847	13.108	12.8198	12.134
PAK4	8.00388	11.3235	10.8642	0	0	0	0	0	0	0	0	0	0	0	0	0	0	0	0	0	0	0	10.0617	9.48035	0	0	0	0	0	0	0	0	0	0	10.1872	11.0912	11.9815	10.8272	10.3682	0	0	0	0	0	0	0	0	0	0
PARP1	11.803	10.8969	10.9099	11.2381	11.3109	11.7633	0	0	0	10.103	10.5767	9.54365	10.3512	11.3969	10.7761	11.6695	11.8777	12.1655	0	9.73013	9.92522	10.1631	11.7736	11.6275	11.8765	12.0783	11.2757	13.6751	12.7953	12.727	0	0	0	12.7566	10.9629	12.12	13.5045	12.3668	11.9927	8.54005	10.0831	9.69951	0	0	0	8.81157	9.42019	9.41832	6.28797
PCID2	11.4916	12.1251	9.02916	10.6562	10.9186	11.4303	8.93522	0	10.0529	12.2164	10.8297	9.51857	12.1079	10.6797	10.3309	11.3299	10.9171	11.329	10.2819	10.2587	10.1485	11.0283	10.9584	11.2397	12.0223	10.7683	9.4359	11.2172	10.8246	10.678	0	11.8723	12.107	0	0	0	12.3447	12.059	12.2487	0	0	0	11.0212	0	9.98613	0	0	0	9.28482
PCNP	10.0741	12.3307	12.9136	10.2746	13.1362	12.3691	11.1376	13.801	12.6396	13.4337	13.5412	13.0181	13.9551	13.1968	13.4087	12.7048	12.3757	12.5781	11.2658	12.5944	12.3821	12.2979	11.8534	12.7034	13.3173	13.6241	13.7583	14.226	13.7103	13.9574	11.8281	13.5121	13.3184	0	12.7599	11.8543	8.97286	13.4378	12.259	10.5035	0	10.8255	11.7985	11.1494	11.7044	13.6137	13.7281	14.0526	13.2817
PDAP1	16.6957	17.203	16.5115	15.7151	17.2348	16.8074	16.4831	16.5447	16.2562	15.6857	16.425	16.463	16.8095	15.9965	16.4151	16.6415	16.2851	16.5212	16.3727	15.6509	15.4549	16.3594	15.6653	15.2179	15.8605	15.9814	16.0148	0	0	0	16.5376	16.8162	16.9683	16.2113	16.6294	16.2966	15.8606	16.0391	16.4638	16.1138	16.6138	15.905	15.707	16.858	15.7957	15.9125	16.4073	16.1966	16.0117
PDCD10	13.3289	11.2246	12.0007	12.6838	12.8473	12.7008	12.3839	12.8338	11.1712	13.1167	12.1606	13.2535	12.3767	12.2686	11.7754	11.7706	13.1018	12.0148	12.7523	11.2308	11.5939	0	12.8082	11.5344	12.7847	12.6171	12.6309	14.2868	12.8806	13.7395	12.6266	12.1372	12.8255	0	12.4729	11.0237	12.0203	12.6576	12.701	12.7216	12.5615	11.9833	13.0878	11.5996	11.98	12.1464	11.2519	11.8481	12.5672
PDCD6	9.34983	11.8137	10.9163	9.30158	10.3165	10.8175	14.0295	9.03265	10.8465	14.5885	9.08877	14.6298	9.78795	10.7788	11.955	10.5347	0	10.0696	0	14.4027	14.35	0	14.5582	14.6167	10.3922	9.53743	7.99932	10.6542	10.0369	9.60108	0	0	0	0	10.7122	10.2594	9.32198	10.7805	10.7191	13.6744	0	12.3467	13.8454	9.52587	13.3318	9.8477	10.0821	9.83644	9.41307
PDIA4	9.51777	14.0501	13.3559	12.9404	13.4645	13.5938	14.6327	9.26339	14.006	12.7119	9.22129	13.5309	10.4454	12.3107	11.9502	12.3807	13.4524	12.8774	0	14.8558	14.3258	0	15.7823	15.5073	13.1036	12.7926	12.3705	12.9815	11.0704	12.3336	0	10.992	8.60062	10.8869	13.6085	13.8113	10.3748	13.2082	14.0955	14.5981	11.6807	14.1026	15.1916	10.0086	14.832	12.8417	11.153	12.2956	12.5127
PDS5A	10.6372	11.193	10.3071	10.2422	10.3801	10.471	0	0	0	0	0	0	0	0	0	0	0	0	0	0	0	0	0	0	0	0	0	12.1449	0	10.136	0	0	0	0	11.0362	10.0721	0	9.81059	9.82211	0	0	0	0	0	0	0	0	0	0
PGK1	14.42	15.4673	15.3035	15.2486	15.3297	15.7095	15.9272	14.0918	15.0616	15.0142	14.392	15.3183	0	0	0	14.2944	15.1189	14.5807	14.6223	15.6653	15.4516	14.6813	16.0039	16.1344	14.59	14.7588	14.8846	15.0125	14.6654	14.8975	0	0	0	13.9905	15.1554	15.6178	14.7114	15.6211	15.3462	15.6706	14.7377	15.615	16.2281	14.4508	15.8233	15.0947	14.038	14.5302	14.9069
PIP4K2C	13.668	15.4362	14.8681	13.2023	15.0934	14.7084	12.0728	8.92616	10.4511	13.1898	10.8886	12.7239	11.7433	12.1203	11.6808	11.4816	11.5767	11.0179	13.4649	10.946	11.9979	13.7342	10.9102	11.9121	14.7075	13.6136	12.2732	13.8696	12.6006	13.3245	0	0	0	13.7016	15.239	14.7286	14.3421	15.0578	14.7301	13.0338	10.4379	12.3577	12.6318	12.1197	12.4185	11.8941	11.6227	11.5884	11.8657
PKP2	12.484	11.1673	12.1337	11.7599	10.9078	12.255	12.0801	12.8595	12.3645	12.3396	12.4006	10.9157	12.1841	12.0831	12.2521	11.9662	10.6724	11.6391	12.4881	12.3867	12.3117	13.0909	11.9565	12.4074	12.013	12.1908	12.2026	15.2213	12.9787	14.4773	13.234	12.4251	12.9484	12.7528	13.3397	13.3394	13.4078	13.5012	12.8969	12.1084	11.9501	12.7072	11.1537	10.9654	12.0444	12.3923	13.0348	12.906	11.8777
PKP3	12.8998	14.4074	14.2089	12.7853	13.8869	14.1	11.6665	12.1968	11.6709	11.5731	12.872	12.5718	12.5076	12.4526	12.5716	12.583	11.1397	12.0983	13.2096	12.7449	12.7108	13.5123	13.1911	13.0016	12.5206	12.4003	12.1775	12.1669	13.1393	12.8075	13.3487	12.5726	12.7007	13.7519	13.8532	14.1356	14.2844	13.7555	13.5649	12.3425	12.8242	11.9381	10.6003	12.567	11.7407	12.2345	12.1114	12.1603	11.3589
PLRG1	10.6109	11.4714	10.7606	10.8613	11.0764	10.7297	0	0	0	9.90326	11.7425	7.91091	10.432	10.8683	11.061	11.1009	10.8557	9.94364	12.3305	8.91967	9.46114	12.7877	10.2071	9.31054	10.282	11.2083	11.0284	10.4367	12.6999	10.3574	10.5872	9.45366	9.95616	10.9932	11.3247	11.2074	12.2634	10.2053	10.2069	8.15305	10.7965	8.72845	0	0	0	11.3442	11.1299	11.7238	9.44257
POGLUT3	10.4545	9.94935	10.4648	12.203	10.9486	11.9015	11.8944	0	11.2273	9.914	0	11.2753	10.0164	13.031	12.3891	11.6263	13.158	12.1403	0	12.5763	11.4122	12.525	13.6042	13.5608	0	12.1936	13.0098	8.63945	12.2508	11.2084	0	0	0	0	11.8341	11.7642	11.391	11.9373	12.1801	12.5141	11.7322	12.2826	12.5918	13.2727	12.1777	12.4809	9.81163	12.0378	12.0985
POLD2	11.8014	0	10.4843	11.9714	9.8577	10.5775	0	0	0	0	0	0	9.95542	9.90633	10.0915	10.5984	0	9.11472	0	10.8134	10.4499	0	11.3545	11.1645	0	0	0	8.30156	6.05411	9.11098	0	0	0	0	8.99189	9.83306	10.4611	10.0586	9.3484	9.02994	11.9078	10.5545	10.7213	0	10.6672	0	0	0	0
POLDIP3	11.8882	11.6622	11.8729	11.5305	10.0332	11.4978	0	0	0	0	0	0	10.0304	10.8687	10.4439	10.5403	11.799	11.1618	11.6885	9.857	10.5652	12.5377	0	9.80674	12.2517	12.4727	12.0467	15.0345	11.9353	14.1068	0	11.9772	11.8074	12.7212	10.6761	11.4171	12.037	9.5475	8.26903	0	0	0	0	0	0	11.2358	10.8495	11.1308	10.4186
POLR2E	12.1462	0	12.3892	12.4111	0	11.6539	0	11.8105	11.32	0	0	0	12.1753	12.3279	12.3862	12.237	12.7624	12.5777	12.5044	11.4996	11.8672	0	0	0	12.3389	12.8085	12.9496	12.5063	12.5296	12.7467	0	12.0417	12.2419	0	0	0	0	0	0	0	0	0	0	0	0	12.2387	12.3856	12.0394	11.9396
PPIF	12.7168	12.9553	12.665	13.1279	12.6982	12.9157	11.3861	13.3109	12.1773	11.5499	12.8422	11.83	12.2825	13.233	12.4559	12.2598	13.111	12.3609	13.1951	11.4162	11.5222	13.7813	11.6422	11.4941	13.1461	13.0604	13.3501	14.9652	13.4714	14.4351	13.4238	11.3922	0	12.2415	12.6249	12.1924	11.5919	12.5971	12.724	9.70866	11.3391	11.3207	11.6047	10.9784	10.9295	12.9783	12.5857	12.3571	12.9817
PPIL1	12.6497	11.9285	12.6905	12.4999	11.2401	12.391	10.588	12.5096	11.5792	11.6253	13.051	17.9592	12.8137	11.7638	12.3293	12.0456	11.5869	11.8853	11.735	11.6489	11.706	12.7582	11.6216	12.1112	12.3235	12.1789	11.6942	11.844	12.1278	12.0327	12.9724	12.401	13.1353	11.6754	10.2823	12.5212	12.1471	14.2654	10.4328	10.6367	12.3886	9.8948	11.8078	11.2348	11.6315	12.4475	12.4595	12.1226	11.919
PPIL4	14.0188	14.3723	13.1492	0	16.117	14.8561	0	0	0	16.915	0	16.4033	14.3212	13.2159	11.2579	0	0	0	0	0	0	15.238	15.6987	13.7058	0	0	0	0	0	0	0	0	0	0	0	0	14.3817	17.8654	13.1226	17.9651	0	16.772	16.6142	0	16.0462	0	0	0	0
PPM1G	14.6806	16.9465	16.4055	13.7115	16.811	16.0528	14.2084	13.6736	13.8862	13.1018	13.9146	14.9278	13.6192	12.6276	13.2735	13.1864	11.9308	12.6479	15.8776	12.8055	13.6607	15.6387	13.4174	13.4133	16.3108	15.2886	12.3329	15.8561	12.7433	14.894	10.9908	13.3619	13.4216	13.4847	16.2264	16.1201	13.7559	15.9658	16.0057	14.5616	11.5883	13.9395	14.3312	13.8011	14.022	11.9278	13.0253	12.7512	11.7809
PPP1CB	12.7527	0	11.2971	0	0	0	0	0	0	0	0	0	12.735	12.3687	12.2837	12.2587	12.4905	12.4825	12.2892	11.116	11.977	12.3851	0	11.3073	12.51	12.6974	12.7193	12.9408	12.36	12.539	10.8061	13.3468	13.3467	0	0	0	0	0	0	0	13.007	11.2582	0	0	0	13.0268	12.6868	13.1061	12.7328
PPP1CC	12.2192	12.1853	12.2049	12.1933	12.6327	12.5301	11.6365	11.7218	10.9472	13.0852	11.6985	12.427	12.4703	12.0436	12.1387	11.9537	12.0565	11.8794	12.4577	11.7502	11.8533	11.4957	11.8	11.7904	11.9662	12.4075	12.3688	12.7567	12.2897	12.6134	9.12923	12.9173	12.8953	10.5451	12.7593	11.6956	12.2606	12.9954	12.4852	11.8726	12.1533	11.3117	11.6774	10.9396	11.0479	12.2902	12.064	12.0811	11.8946
PPP4C	9.92692	10.8904	8.86144	0	11.3231	10.1058	0	0	0	0	0	0	0	0	0	0	0	0	0	0	0	0	12.0522	10.3594	0	0	0	0	0	0	0	0	0	0	10.7447	9.94724	0	10.7455	11.8767	0	0	0	0	0	0	10.6353	9.93645	9.62251	0
PPP4R2	9.62571	11.7055	11.0127	0	11.03	11.0662	0	0	0	0	0	0	0	12.3229	10.6439	9.87742	11.5193	10.401	0	0	0	0	8.48055	9.5035	10.253	9.93679	11.9394	11.654	12.4047	10.4881	0	0	0	0	11.5394	10.9916	0	10.1115	11.0616	0	0	0	0	0	0	11.4107	9.94557	11.1174	11.0044
PPP5C	11.4925	11.1912	10.9608	12.5007	10.8232	11.959	12.0891	11.5612	11.1476	10.6092	10.7379	11.7679	10.9241	12.4219	11.7588	10.9868	12.7961	11.9613	0	12.4206	12.0509	0	13.4067	13.249	10.3693	11.8336	12.5779	10.4163	12.0006	11.2723	0	0	0	0	9.35149	11.8631	9.45955	10.529	9.18034	12.1902	12.0976	11.4717	12.7654	11.0872	12.2934	12.622	10.9728	11.7538	12.3796
PQBP1	11.6784	13.8925	13.1719	11.4561	13.486	12.6219	0	0	0	12.8042	12.728	12.4745	12.4174	10.9921	11.6571	12.4839	11.0185	12.0037	12.4824	10.6884	10.0123	13.114	10.6927	0	11.8854	11.9961	11.0873	0	0	0	12.6559	12.1125	12.7575	0	13.9189	13.0433	11.4303	13.7624	12.9655	0	0	0	0	0	0	11.6877	12.1922	11.6985	11.0956
PRDX1	16.9687	17.1263	17.2928	17.7922	17.0915	17.034	17.1847	18.06	17.2765	17.8081	18.2379	17.5155	17.6767	18.0947	17.9606	0	0	0	17.2646	17.7797	17.9689	17.487	17.7743	17.3684	17.0645	17.0317	16.7858	16.379	17.5058	17.1503	18.397	16.7289	17.4977	17.4764	17.173	16.8045	16.3994	17.2862	17.4127	17.113	17.131	16.8319	17.2959	17.2563	17.126	17.9412	16.6567	17.2579	18.154
PRKDC	13.1345	15.089	14.7941	10.4883	14.4437	14.4815	9.96989	0	10.301	10.0229	0	11.4158	12.4376	11.2856	10.721	12.2945	8.8336	10.5824	13.3799	11.9918	12.5657	14.3974	12.4445	12.7663	15.5768	14.1893	12.5884	15.3943	12.6402	14.2946	0	12.9006	10.3774	12.2161	14.4004	15.0931	14.479	13.4317	14.307	12.5288	9.80198	10.958	10.8431	10.6922	9.63341	11.5831	12.3397	9.76035	9.99789
PRPF19	14.7558	14.5526	14.3087	14.1762	14.2928	14.1187	0	0	0	11.7131	15.0194	12.8261	14.1655	14.003	13.8652	13.8255	13.4626	13.5636	14.7635	12.4185	12.7716	15.2664	12.6716	12.6401	14.268	14.3156	14.2237	13.0283	14.6444	14.2437	15.0225	13.8322	14.0718	14.8483	14.4403	13.8767	15.4115	14.3009	14.2014	12.13	15.0289	13.3741	11.725	14.5745	12.9662	14.3339	13.6904	13.867	13.4768
PRPF3	10.8784	11.7273	12.2486	8.15497	11.7827	11.1992	0	0	0	0	0	0	11.3415	11.2572	11.5653	12.0078	10.2215	11.3156	0	0	0	11.1592	11.0809	8.95002	10.2759	11.3397	11.2105	0	11.8492	10.6309	10.2937	11.7497	11.5732	10.4442	10.8176	11.3805	10.5937	10.1038	9.69899	10.1836	10.3138	0	0	0	0	11.2052	13.1391	12.656	0
PRPF4	12.1315	12.8962	12.9913	11.161	12.0005	11.9562	7.58515	11.5238	8.73351	9.36111	12.8544	9.6748	13.3465	13.8738	13.5715	13.1258	13.0268	12.7931	0	10.7597	10.2513	12.3431	9.69223	10.1419	13.0125	13.5116	13.8643	10.8967	14.2569	13.2814	10.7466	12.1165	10.7675	10.636	12.3798	11.7368	11.9228	11.5537	11.4098	9.05856	11.9239	10.902	9.15196	12.3106	10.0163	13.5239	13.8286	13.6869	12.8547
PRRC2B	12.5882	11.6692	12.6444	12.3964	12.4157	12.7062	11.2424	12.0077	11.6382	8.73508	11.8638	8.74302	13.1615	13.3135	12.8478	12.5175	13.7158	13.0465	0	12.4371	11.8492	11.8685	11.5658	12.1093	12.0641	13.0158	14.0068	11.5083	13.6856	12.754	11.7735	13.1673	13.1071	12.3573	10.9437	12.0007	12.5326	11.3874	11.8557	0	12.7257	12.7753	0	11.983	12.6188	12.7569	12.9842	12.8619	12.7044
PSMD5	14.8218	13.9842	13.8012	14.3441	14.6092	14.3103	0	0	0	0	0	0	14.017	14.7922	14.5285	14.2101	15.1732	14.7215	0	0	0	0	13.5751	13.2588	10.8456	14.1536	15.1838	0	0	0	0	0	0	13.7236	14.0479	13.5268	14.015	13.4778	14.2149	10.7661	14.9693	13.2649	11.8655	14.3907	12.7192	14.0394	14.2834	14.1799	13.903
PSPC1	11.7573	12.8194	12.9149	12.5794	10.583	12.3699	0	0	0	0	0	0	11.4365	11.2929	11.4292	11.7839	11.3046	11.7957	12.8833	11.5174	11.5014	13.1753	10.6024	11.2461	12.8235	12.4619	12.4567	12.4376	12.3102	12.29	10.2803	11.2727	11.0587	9.73561	11.7944	12.4337	12.0939	8.44151	11.1224	9.29797	10.6645	8.49097	0	0	0	10.9096	11.6463	11.3503	9.52759
PTGES2	7.94287	13.087	12.3237	10.5964	12.2954	12.3391	12.4304	0	11.2452	12.3431	0	11.0089	9.87234	11.015	10.4721	10.0773	11.5087	10.5949	0	10.9668	10.9651	0	11.4968	11.5861	11.2143	12.0818	11.7437	11.227	11.5074	12.4614	0	0	0	0	12.8359	12.699	11.2112	12.5909	12.8134	12.518	0	12.5122	11.8924	0	12.3035	11.0724	9.47391	10.4432	10.3884
PTPN11	11.6633	10.3084	11.1915	11.3197	12.9913	10.6964	0	0	0	0	0	0	11.8496	11.2632	10.8015	11.2074	10.2053	11.0053	0	10.9486	9.65411	0	10.3698	10.7639	10.1765	10.4622	10.928	10.2863	11.3374	11.1798	0	0	0	0	0	0	10.5941	9.11968	10.8634	0	0	0	0	0	0	11.4517	11.962	11.637	10.9352
PUF60	12.6662	14.2016	13.755	12.4649	13.7845	13.3296	0	0	0	0	0	0	13.0125	13.2256	13.1545	13.1156	12.61	12.8763	14.7845	12.1335	12.8652	14.4871	12.6916	12.5956	14.7125	14.1374	13.6804	13.6861	13.5603	13.6666	13.6462	13.4473	13.5422	0	0	0	0	0	0	0	0	0	0	0	0	12.8168	13.2875	13.0994	0
RAB13	11.3944	12.3761	11.4284	10.4767	12.6691	11.1241	0	0	0	10.9176	0	10.0254	11.1968	11.3783	11.4683	11.2706	9.96483	10.9973	11.5442	10.6678	10.6197	11.2383	0	9.78826	12.5266	12.341	11.9941	12.0792	11.4324	11.7378	0	0	0	0	13.0389	12.0473	10.4698	12.4132	12.4549	0	0	0	0	0	0	11.6309	10.8542	11.0752	10.4153
RAB1A	13.3595	12.4975	12.3867	13.6156	13.8725	12.5223	14.4525	13.3498	13.9605	13.2801	12.7455	13.8001	12.767	12.4845	12.5487	12.5816	13.3821	13.1383	13.4	14.2306	14.1833	12.9395	14.2739	14.4936	14.2447	13.9941	13.1253	15.9804	12.608	14.7531	12.7285	12.3992	12.5983	12.8278	14.1842	13.4135	12.8757	13.8162	14.8971	14.3869	13.1272	13.2197	13.7979	12.6203	14.3659	13.2758	12.4301	12.7384	13.3928
RAB5C	10.7396	11.6954	12.1292	11.5447	11.6011	13.129	13.4122	12.6545	13.0041	10.4286	10.4164	12.7985	11.8565	11.9893	12.072	11.8078	12.7273	12.1912	9.4634	12.2515	12.0603	9.18658	12.5841	12.8801	12.9552	12.9592	12.8244	14.6628	12.0469	13.7659	0	11.7649	10.9826	0	12.2472	13.5132	9.05799	11.3836	13.3448	13.6755	10.5242	13.1542	12.5616	0	12.932	12.6519	12.8441	12.6802	12.7672
RAB8A	10.9743	12.9595	12.5517	11.6178	13.0193	12.9259	11.6844	0	10.8455	12.2573	0	12.2192	11.1605	11.1098	11.4362	10.8907	11.1421	11.0879	11.9348	10.0333	10.4345	11.7496	11.4834	11.1225	11.824	11.5151	11.2206	12.2091	10.8672	11.5293	0	0	0	0	13.2349	13.05	11.1806	13.9489	12.4739	12.1837	0	11.883	0	0	0	11.0656	11.4539	11.4625	10.9885
RAC1	13.6175	13.3517	13.986	13.1915	12.2012	13.6458	13.4526	13.6724	13.6085	13.985	13.45	12.2494	14.1467	12.7022	13.197	13.4003	12.4353	12.8971	13.7375	13.1513	13.2799	14.224	12.9918	13.1937	14.4206	13.9008	13.3028	14.0425	12.7146	13.4473	14.0727	13.6855	13.464	12.5622	13.447	14.0022	13.1203	13.7724	14.2091	12.8254	13.0229	13.7108	12.4905	12.5929	13.1316	13.1783	13.6617	13.4059	12.9691
RAD50	12.0684	12.8363	12.4395	11.4374	12.1189	10.8646	0	0	0	10.3561	10.279	10.4039	11.2406	9.98569	11.2343	0	0	0	0	9.77621	9.09122	9.38057	12.0287	10.2577	11.0676	9.70138	9.15985	7.39934	9.44245	9.52956	0	0	0	12.6483	13.1247	12.7737	14.4704	12.7124	12.6135	10.4277	11.3728	10.4433	9.16282	8.56518	9.28134	9.94791	0	9.08773	10.8687
RAE1	13.8301	13.5048	14.1095	13.9794	12.6897	13.6099	13.2592	13.5811	13.134	11.1607	13.6827	12.9565	11.9786	13.8487	13.3357	12.768	13.7624	12.9654	13.5142	13.2897	13.332	13.9353	12.596	13.2677	14.1463	14.1784	14.5007	13.6183	14.2776	14.1939	13.1682	12.4699	12.5155	13.4	13.1529	13.7477	13.8341	12.2224	13.0953	13.0647	13.3551	13.4249	12.4832	13.2141	13.1328	13.753	12.7944	12.9059	13.2887
RAF1	15.1974	14.5279	15.3443	14.3156	14.6562	14.5859	13.4242	13.0141	13.2351	12.8167	12.9225	13.1502	13.594	10.5632	12.412	12.7187	8.39697	11.4561	15.1805	0	12.0107	15.5116	8.46748	10.214	16.0093	14.6055	8.42251	15.0369	10.6594	13.9827	12.6398	13.6147	13.4798	15.07	14.4539	14.6903	15.0965	13.0868	13.8028	13.734	11.229	13.7194	13.4677	13.6841	12.7662	6.64645	12.2165	11.4185	9.07658
RALB	12.7456	13.0741	11.9793	10.4874	13.5028	12.7546	0	0	0	13.6731	10.47	12.2317	0	0	0	0	0	0	12.0005	11.8414	11.5271	13.4601	11.7414	10.8607	13.5616	11.5969	6.93723	11.916	8.85164	11.767	0	0	0	12.1062	14.1366	12.9565	10.3654	14.5419	14.0889	12.7972	9.84602	12.0544	11.7149	0	10.0522	0	0	0	0
RANBP1	8.82741	15.2397	15.108	10.6554	14.6172	14.3721	13.4179	0	12.5831	13.5567	9.44655	12.9331	10.3634	11.8183	10.2563	9.28382	12.4775	11.6513	11.9643	14.322	13.9407	11.8258	14.8547	15.0092	15.0301	14.3855	12.4277	14.5524	10.9676	13.8778	0	0	0	0	14.4756	14.491	10.8621	14.9509	14.7322	13.041	0	12.8454	14.2073	11.1855	14.2403	11.1547	9.55999	10.4164	9.67915
RANBP2	11.3342	14.1754	13.943	12.1813	13.3315	13.2521	11.0944	0	10.0787	10.1944	0	10.4553	10.1165	10.8464	9.97492	9.92291	12.1366	10.9233	11.3786	10.6629	10.3401	13.0103	11.408	11.1206	16.1371	14.9393	12.3868	13.6973	11.8023	12.664	0	0	0	10.5094	13.4376	13.584	13.0524	12.4416	12.8452	10.7687	0	9.10538	10.9223	0	10.7757	10.8138	9.77381	10.1799	10.3514
RANGAP1	14.0292	15.5321	15.5891	13.7194	14.8184	15.0108	0	0	0	0	0	0	0	0	0	0	0	0	15.2463	13.0477	13.4355	16.3172	13.5751	13.9381	17.2971	16.2558	14.093	15.3315	14.0544	14.9337	0	0	0	13.3742	14.6657	15.1371	15.3531	13.9476	14.4216	14.0058	12.3509	13.6101	13.6573	12.4971	13.6755	0	0	0	0
RAP1GDS1	9.32725	14.1186	13.7973	8.07374	14.6948	14.5269	10.1911	1.81238	6.8479	8.84101	0	7.72189	0	0	0	0	0	0	8.93303	0	6.63575	7.50412	6.02945	5.66424	12.7399	10.9356	0	11.8372	0	10.4568	0	0	0	0	14.4512	14.182	10.0798	13.7805	13.9416	9.46307	0	9.43193	9.42875	0	9.31565	0	0	0	0
RBBP7	11.4267	11.863	10.7758	12.011	12.3595	12.088	10.5417	10.5638	11.2244	11.6696	11.4022	10.8111	12.1812	12.1862	11.7638	12.4192	13.7632	12.9135	11.0261	11.7144	11.2101	0	13.1261	12.0345	11.2878	12.6359	13.6345	10.9348	12.3881	12.0476	0	11.7484	10.5459	0	12.5843	11.4029	11.2584	13.0903	12.2958	11.8358	12.4889	10.6946	11.8976	11.7947	10.8957	12.0902	12.4068	12.3663	12.2639
RBM14	13.0367	13.4479	13.4334	12.743	13.1356	13.3603	0	0	0	0	0	0	12.103	12.4614	12.1996	12.2054	13.2138	12.5195	12.7002	12.2295	11.9958	13.9215	12.3179	12.2482	13.4171	13.4701	13.5943	14.517	13.2113	14.0676	12.4299	12.91	13.3603	12.2063	13.032	12.9941	12.419	11.8823	12.8254	0	0	0	0	0	0	12.2872	13.2376	13.0116	0
RBM17	11.5604	13.8066	12.5315	10.491	12.2823	11.7236	0	0	0	11.0803	12.6887	8.8015	12.8394	13.4664	12.7122	12.5971	10.8427	11.4255	10.7524	9.84904	9.34066	12.267	9.19609	9.18069	13.8081	13.6048	13.5656	11.6976	14.3599	13.4656	12.6645	11.4235	12.0835	11.4808	13.1911	12.2488	11.8749	12.0223	12.134	8.81782	11.7343	8.80142	8.81234	12.4055	8.77149	12.4851	13.436	13.2417	11.5359
RBM22	10.6052	11.7044	10.658	10.0264	11.9666	10.4806	11.3539	0	10.3712	0	0	0	11.4082	10.4865	11.0853	10.7356	10.5455	10.5006	0	0	0	0	10.4256	10.204	10.5089	10.4623	10.8463	11.5931	11.0702	11.5929	0	0	0	0	11.3302	11.3793	0	10.4588	11.385	10.0876	0	11.1074	11.8204	0	11.1997	10.7476	10.8847	10.6132	0
RBM27	9.9085	11.3168	10.53	10.7711	10.7337	10.2442	0	0	0	0	0	0	9.98081	9.33651	10.2026	10.2364	10.2478	9.80319	0	0	0	11.2191	10.568	10.2043	10.6305	10.428	10.0115	9.80745	9.72269	9.64988	0	0	0	0	10.5163	10.5943	12.7527	9.94386	10.5385	0	0	0	0	0	0	9.83026	9.03239	9.7969	0
RBM39	11.0602	13.0871	13.7519	10.5885	11.6096	12.9661	11.9797	0	10.7858	10.1757	0	12.3601	12.2405	11.6844	11.7217	12.1535	9.2317	11.4828	12.3402	11.8568	11.3143	12.444	11.7121	11.9549	12.5611	12.2974	11.6137	12.384	12.0634	12.333	0	12.6329	12.0055	11.9377	11.3636	12.9414	13.6541	10.2871	11.7751	12.3077	12.6754	12.7436	12.2102	11.6504	12.6655	10.7065	12.348	11.9631	0
RBM42	10.2706	12.2578	11.3865	9.04155	11.8131	11.998	0	0	0	0	0	0	9.90552	11.2505	10.483	11.2759	10.8797	10.8641	0	0	0	0	0	0	10.6252	10.3154	11.324	10.2662	11.9164	11.269	0	0	0	0	11.4845	11.8001	11.2528	0	12.3899	0	0	0	0	0	0	10.4129	12.0044	11.5262	0
RCC2	12.1861	13.2993	13.3712	12.5671	12.1544	12.7269	12.207	11.6116	11.4579	12.0444	12.7388	12.1198	10.6925	11.747	11.4958	11.3179	11.9055	11.4042	13.2067	13.3285	12.8384	13.8355	12.9151	12.8144	12.7839	11.787	11.1709	11.8002	11.7589	11.6613	12.1773	12.5249	11.1858	13.2987	12.5807	13.1055	14.3578	12.2605	12.1536	11.8374	11.7124	12.4631	11.5723	12.1217	11.937	10.6779	9.26791	10.857	9.704
REEP3	11.7591	11.524	11.7263	10.6857	10.6275	11.8728	0	0	0	0	0	0	0	0	0	0	0	0	0	0	0	0	0	0	12.9695	11.219	0	0	0	0	0	0	0	11.186	11.7046	11.5682	11.4875	12.0341	11.5409	0	0	0	0	0	0	0	0	0	0
REEP4	8.97814	10.1631	10.763	0	0	0	0	0	0	0	0	0	0	0	0	0	0	0	0	0	0	0	0	0	11.6056	10.3466	0	0	0	0	0	0	0	0	0	0	0	0	0	0	0	0	0	0	0	0	0	0	0
REEP5	10.6994	14.6651	13.8864	12.4907	14.7189	13.7599	13.2678	0	13.1143	13.2261	9.83083	13.7249	0	10.8704	10.436	10.6136	11.4592	11.0784	10.6764	12.3466	12.4077	0	13.0624	12.6792	13.6476	12.7834	11.3137	13.6043	10.4739	12.5125	0	0	0	9.98741	14.4048	14.1447	11.8697	14.1893	13.8624	13.3737	10.3714	12.836	12.9966	0	12.9239	11.4032	10.4966	11.1501	11.3039
RGPD3	9.76717	10.8029	12.1102	10.1241	0	10.7941	0	0	0	0	0	0	0	0	0	0	0	0	0	0	0	0	0	0	0	0	0	12.7244	0	12.3927	0	0	0	0	0	0	0	0	0	0	0	0	0	0	0	0	0	0	0
RIN1	13.5166	15.8783	15.5787	13.2689	15.2238	15.4143	12.4175	12.5679	12.6111	10.5313	12.8256	12.5643	12.1108	8.0319	11.2165	10.6561	0	9.25641	13.7783	7.30415	8.15906	14.2247	4.32995	10.7118	15.2931	13.9567	8.39343	14.697	9.77575	13.7564	11.4813	11.7807	11.9207	13.6405	15.3435	15.7909	14.5524	12.7376	14.5359	13.5916	10.5653	13.4423	13.2933	13.9339	13.4454	8.73603	12.0745	11.1248	8.73573
RPL10	13.6159	14.4997	14.4374	13.0254	14.4649	14.4178	0	0	0	0	0	0	0	0	0	0	0	0	14.8992	12.8558	13.2891	15.1449	13.1302	13.4902	0	0	0	0	0	0	0	0	0	0	0	0	0	0	0	0	0	0	0	0	0	0	0	0	0
RPL23	15.9164	16.1756	15.8084	15.331	16.2934	15.8723	0	0	0	16.2806	14.647	15.5208	0	0	0	0	0	0	16.4643	14.5726	14.7785	16.639	15.0849	14.77	0	0	0	0	0	0	0	0	0	15.924	15.9196	15.6856	15.9559	15.7787	16.1353	15.9524	14.6565	15.2706	0	0	0	0	0	0	0
RPL38	15.6807	16.1997	15.8337	15.0552	16.4634	16.1458	16.0316	14.8862	15.2266	17.1061	14.7122	16.3455	0	0	0	0	0	0	0	0	0	0	0	0	0	0	0	0	0	0	0	0	0	16.0741	15.9136	15.4154	15.9215	16.3441	16.0642	16.1459	14.7075	15.4861	15.7895	15.0154	15.2596	0	0	0	0
RPL5	14.8713	16.4731	16.1906	14.3581	16.4873	16.048	0	0	0	0	0	0	0	0	0	0	0	0	16.3139	13.6294	14.2129	16.7143	14.0179	14.1914	0	0	0	0	0	0	0	0	0	15.2434	15.9107	15.5577	14.7692	15.5745	15.3901	0	0	0	0	0	0	0	0	0	0
RPLP0	15.223	15.9189	15.5009	14.5528	15.8677	15.7153	0	0	0	15.3612	13.6472	15.3784	0	0	0	0	0	0	16.1275	14.3545	14.5695	16.0485	15.0388	14.9438	0	0	0	0	0	0	0	0	0	15.3163	15.6075	15.513	15.2728	15.2623	15.5922	16.0631	13.5407	15.3513	15.6422	13.8809	15.2066	0	0	0	0
RPN1	11.4609	14.2792	13.3723	10.4046	14.4697	13.9612	11.4838	8.39551	7.55639	12.6977	0	12.1085	10.4433	7.60095	9.53999	10.7334	7.70653	9.57513	13.1351	9.09121	10.3857	13.8111	11.1802	11.1799	14.1313	12.9342	9.00967	15.0429	9.49883	13.8512	0	12.2501	9.21571	8.34753	14.6469	14.1164	10.8122	14.6695	14.3821	13.0481	0	11.86	12.16	0	11.1281	5.65431	11.2812	9.05312	5.31853
RPN2	9.72798	13.1489	12.336	7.89118	13.4357	13.1999	10.7811	0	7.98883	11.6363	0	11.4993	9.5941	8.97815	8.95681	9.95655	8.8056	9.37591	11.4232	9.88205	10.3949	10.8157	11.0418	10.7031	13.3485	12.3299	10.069	15.3334	10.2823	14.2114	0	11.7171	10.793	0	13.6291	13.1915	9.5259	13.1851	13.5438	12.1916	0	11.0445	11.2858	0	10.343	7.32939	11.989	10.3401	0
RPS15	15.0797	15.3161	15.187	14.5175	15.7303	15.3864	0	0	0	0	0	0	0	0	0	15.7414	14.1827	15.3225	0	0	0	0	0	0	0	0	0	0	0	0	0	0	0	15.2068	15.2142	15.0684	0	0	0	0	0	0	0	0	0	0	0	0	0
RPS16	18.2403	17.5917	18.0861	0	0	0	0	0	0	0	0	0	17.9823	17.9078	18.1482	18.2901	17.9294	18.2133	0	0	0	0	0	0	17.426	17.7662	17.8617	0	0	0	18.7293	18.275	18.511	0	0	0	0	0	0	0	0	0	0	0	0	17.7277	18.0403	17.9657	17.5947
RPS21	16.2257	16.2353	16.1111	15.462	16.9219	16.5623	14.956	16.3288	15.2251	15.2947	16.2075	15.577	15.8762	15.9626	15.9677	15.2688	16.3593	15.8817	15.9497	15.266	15.2782	16.3326	15.384	15.2218	15.6647	15.9299	15.9745	0	0	0	16.8499	16.1318	16.2162	0	0	0	0	0	0	0	0	0	15.2384	15.8743	15.2142	15.8903	15.807	15.9145	15.895
RPS26	17.3885	17.3226	17.39	16.8915	16.9423	17.5131	16.354	17.2938	16.476	16.5794	17.3282	15.5519	0	0	0	0	0	0	0	0	0	0	0	0	0	0	0	0	0	0	16.6947	17.393	16.8912	16.9512	16.6648	17.3012	0	0	0	16.8484	17.079	16.7267	16.3673	17.4605	16.5107	0	0	0	16.509
RPS27	18.3637	18.2902	18.3681	17.8456	17.8741	18.3456	17.6905	18.3514	17.7789	0	0	0	18.3857	17.9229	18.2122	18.2097	17.9796	18.0599	0	0	0	0	0	0	17.6371	17.7805	17.8606	0	0	0	18.3957	18.6559	18.6926	18.2687	17.3503	17.9875	18.0114	17.9092	17.7512	17.7104	18.1827	17.7569	16.9833	18.2142	17.3704	17.7252	18.2973	18.0761	17.7464
RPS28	17.0043	14.8268	16.2148	16.2743	16.6086	15.1962	14.2078	17.3949	15.708	14.7748	17.2295	15.9552	0	0	0	0	0	0	0	0	0	0	0	0	0	0	0	0	0	0	17.3272	16.1768	16.307	16.8648	15.7993	15.4315	15.5193	16.94	15.6668	0	0	0	0	0	0	0	0	0	16.1277
RPSA	18.7713	18.5391	18.651	0	0	0	0	0	0	0	0	0	18.6285	18.6212	18.6679	18.7408	18.9413	18.791	0	0	0	0	0	0	18.2593	18.5063	18.8245	0	0	0	19.2306	18.7257	18.7239	0	0	0	0	0	0	0	0	0	0	0	0	0	0	0	18.439
RRBP1	15.0761	14.8	14.4271	14.815	14.7902	14.5456	14.0963	13.6019	13.5868	0	0	0	0	0	0	0	0	0	15.1674	13.9049	13.9432	15.2754	14.6765	14.539	15.1383	14.8373	14.3183	15.196	13.9161	14.7106	0	0	0	14.9234	14.5658	14.3773	14.2747	14.5798	14.7826	0	0	0	0	0	0	0	0	0	0
RRP1	11.3895	14.3701	14.1841	10.2287	13.3549	13.7107	0	0	0	0	0	0	0	0	0	0	0	0	0	0	0	13.6697	0	6.813	13.7621	12.3309	0	13.3144	8.19574	11.9045	0	0	0	11.4538	13.7254	13.8651	11.8472	11.1718	11.9663	0	0	0	0	0	0	0	0	0	0
RRP12	10.9461	12.6611	12.2884	9.2574	12.7496	11.1499	0	0	0	8.50613	0	7.48236	11.6736	8.55723	10.1995	9.79593	9.28737	10.7583	0	0	0	0	0	0	12.9108	11.7048	0	13.0754	8.98074	11.3368	0	11.4242	11.4952	10.3056	12.6464	11.8064	10.5458	10.9613	10.7731	0	0	0	0	0	0	0	12.0113	10.7376	8.42299
RTCB	14.637	15.1863	14.6768	14.4471	14.9072	14.6837	0	0	0	0	0	0	0	0	0	0	0	0	0	0	0	0	0	0	0	0	0	0	0	0	0	0	0	14.7022	15.0389	14.713	15.1354	14.4086	14.5513	0	0	0	0	0	0	0	0	0	0
RTN4	13.2729	16.8576	16.661	14.0951	15.8749	16.2265	0	0	0	0	0	0	0	0	0	0	0	0	0	0	0	0	0	0	15.8836	14.6151	12.763	15.8122	12.341	14.7605	0	0	0	13.4299	15.4492	16.3916	14.1197	15.6763	15.6277	0	0	0	0	0	0	0	0	0	0
RTRAF	13.5899	14.4562	14.1526	0	0	0	0	0	0	0	0	0	0	0	0	0	0	0	0	0	0	0	0	0	14.5346	14.1906	13.913	0	0	0	0	15.0256	14.5076	0	0	0	0	0	0	0	0	0	0	0	0	0	0	0	0
S100A16	11.7268	12.9439	12.23	10.5627	13.1457	12.8414	0	0	0	12.5635	0	12.1526	0	12.8413	11.8083	12.4917	12.9	11.1729	0	12.3072	11.2534	0	12.5428	12.047	0	10.8463	12.269	12.306	12.7638	12.6201	0	0	0	10.6076	12.8682	12.5758	11.2881	13.9886	13.5185	11.5617	0	9.13534	10.8221	0	9.71933	11.6692	11.6959	9.92437	12.3818
S100A6	10.5449	9.12562	9.81594	0	0	0	0	0	0	0	0	0	0	0	0	0	11.4094	9.84064	0	9.69611	11.5269	0	0	0	0	9.94027	9.81224	0	0	0	0	0	0	0	0	0	0	10.9989	9.84763	0	0	0	0	0	0	10.8072	10.9529	10.3998	0
SAP30BP	14.7485	14.771	15.0398	14.3036	13.9686	14.4195	12.6297	14.6397	13.5586	11.2055	15.8179	13.5158	14.8854	14.087	14.3554	14.5542	13.5093	14.2609	15.6763	13.077	13.6835	15.9227	12.8309	13.4149	15.3103	14.818	14.3528	13.9505	14.3582	14.1282	15.6547	14.4347	15.0878	14.3747	13.788	14.0248	14.7263	13.3086	13.9593	11.6113	15.0358	13.5018	11.7312	15.1412	13.4763	14.3455	14.2343	14.3308	13.8756
SARS2	11.4431	13.5538	13.3743	11.4533	13.8512	14.115	0	0	0	7.63985	0	9.1184	11.9098	11.511	11.6552	12.1048	0	11.122	9.65421	8.68022	8.81964	0	11.2045	10.1195	12.2861	10.6167	10.3601	10.5365	10.8836	11.1447	0	0	0	10.6952	12.6351	13.3481	11.2602	11.7393	12.2361	11.5505	8.93369	11.6274	11.202	9.18339	10.8884	10.1408	12.2618	11.51	10.4659
SART1	11.8769	11.5008	12.2963	0	0	0	0	0	0	0	0	0	13.0568	11.8555	12.7085	13.7521	11.4769	12.8913	11.0396	8.97797	9.82893	11.9075	0	8.20692	12.3354	12.3972	12.9214	10.0316	13.3485	12.1604	11.9913	12.5755	12.6054	0	10.1948	10.8974	11.1187	9.74789	9.85054	0	11.4477	9.76938	0	0	0	11.5142	14.6293	13.4013	11.4013
SART3	9.21833	12.9648	12.4277	9.69838	13.0464	12.927	11.202	8.51999	9.93125	10.4143	8.33568	11.3658	11.6595	12.9342	12.4619	12.3716	12.5942	12.3588	0	12.4901	11.6151	0	12.7288	12.433	10.5248	11.9404	12.9017	9.16891	13.0204	11.9176	0	0	0	10.1415	12.9382	12.8775	11.2632	12.6682	12.4912	12.228	7.76977	11.4514	11.5842	9.12752	11.2565	11.5053	12.2955	12.0329	11.061
SBDS	13.6726	14.4464	13.9705	13.5825	14.8591	14.17	0	0	0	14.2574	12.5153	13.3064	0	0	0	0	0	0	0	0	0	14.4005	12.8395	12.6961	0	0	0	0	0	0	0	0	0	13.6396	14.6772	13.8732	13.1059	14.4566	14.1513	13.7052	12.9078	13.4549	0	0	0	0	0	0	0
SCCPDH	11.3509	10.8117	10.2707	9.76761	11.7643	9.1076	0	0	0	0	0	0	9.11949	8.58447	8.29085	8.55171	9.12182	8.08018	0	0	0	0	0	0	13.5968	11.6801	9.11331	12.4622	8.82	8.61747	0	0	0	10.5904	10.8568	10.2484	11.0517	11.8864	9.80373	0	0	0	0	0	0	8.58152	9.26087	7.35138	0
SCFD1	10.2866	9.58006	10.0492	0	10.4807	10.0124	0	0	0	0	0	0	9.35048	10.3746	9.66399	10.2707	8.95992	9.75679	0	0	0	0	10.3576	10.2252	9.96481	9.55769	9.58805	10.9068	9.5292	10.5265	0	0	0	0	9.86619	11.4688	0	11.8282	10.6907	11.252	0	10.6421	11.3795	0	10.9199	9.63084	10.7055	10.0192	0
SDHA	10.3709	9.16378	10.6244	10.0926	10.7097	9.73739	10.6275	9.38143	9.66036	12.0295	9.72526	12.0287	0	0	0	0	0	0	0	10.4281	9.05856	0	12.9249	12.5685	0	0	0	14.6877	8.54299	12.4562	0	0	0	0	12.1484	10.7866	10.2644	14.2115	13.9217	11.2934	0	11.1431	12.4667	0	11.2048	0	0	0	0
SEC22B	11.5703	12.3917	12.5568	0	12.7683	12.516	0	0	0	11.6568	0	11.5414	11.7946	10.23	10.9065	11.6756	10.4379	11.1387	11.7288	10.1572	9.20429	12.6126	11.5467	11.1731	13.3963	12.6492	11.5098	13.892	10.9672	13.1901	0	0	0	0	12.8459	12.7397	11.4594	11.6975	12.9075	12.5211	0	11.7019	12.232	0	11.4744	0	11.9428	11.0999	7.35324
SEC31A	12.2999	13.7287	12.5378	13.2402	13.7599	13.1939	12.145	12.7701	12.3657	11.8546	0	12.1178	11.5062	12.2925	11.8622	12.3033	12.931	12.7574	12.3213	11.6033	12.6944	13.0381	12.8096	10.6669	12.69	13.1169	12.9576	13.6048	11.2131	13.3253	12.3014	10.8185	11.7411	12.7445	14.1122	12.9411	11.7986	13.4915	13.4764	12.8386	0	10.9998	11.7165	10.7277	11.6269	12.4381	11.7674	12.2293	12.4311
SEC61A1	12.3495	12.594	12.1311	0	13.3486	11.4747	0	0	0	9.14329	0	8.99725	0	0	0	0	0	0	0	0	0	0	0	0	12.0769	11.6785	0	11.771	0	9.32768	0	0	0	11.6693	13.4387	12.3033	11.7304	12.8837	11.3812	9.21688	0	8.86368	0	0	0	0	0	0	0
SEPTIN11	11.6648	10.0908	10.9618	0	10.6743	10.1	0	0	0	0	0	0	0	0	0	0	0	0	0	0	0	0	10.9982	10.0749	0	0	0	9.55467	9.95392	9.72474	10.8227	10.8925	10.7085	0	11.0383	10.7438	0	11.2558	11.815	10.4244	0	10.1317	10.0741	10.3255	9.43042	0	0	0	0
SERBP1	14.9633	16.7069	16.4144	14.0007	17.1295	16.3979	0	0	0	16.7237	14.627	16.3631	0	0	0	0	0	0	0	0	0	0	0	0	0	0	0	0	0	0	0	0	0	0	0	0	14.4284	16.3429	15.9975	0	0	0	0	0	0	0	0	0	0
SERINC1	12.0711	14.3594	13.9874	12.5765	0	14.0567	0	0	0	13.4124	0	12.9166	0	0	0	0	0	0	0	0	0	0	0	0	12.8214	12.0804	0	12.527	0	12.2383	0	0	0	12.7317	14.4244	13.9438	13.4259	0	14.1015	12.9861	0	12.3942	12.5885	0	12.1847	0	0	0	0
SET	15.9106	18.2079	18.2585	15.922	17.7578	17.7925	0	0	0	0	0	0	0	0	0	0	0	0	17.317	16.4951	16.2914	0	0	0	17.9155	17.2298	15.7865	0	0	0	0	0	0	0	0	0	0	0	0	0	0	0	0	0	0	0	0	0	0
SF1	15.2621	15.3194	15.1284	15.0529	14.4832	14.6474	11.7461	15.7449	14.0866	12.2421	16.2613	13.4688	14.8083	14.5614	14.6209	14.1986	14.5702	14.4276	16.1927	13.9013	14.4678	15.8857	13.4089	13.1587	14.1268	14.9149	14.7525	15.0136	15.3273	15.0158	16.6038	14.7875	15.556	15.499	13.6084	14.4744	14.9602	14.3408	13.5216	0	0	0	0	0	0	14.8803	14.453	14.6303	14.5843
SF3A1	16.7245	16.1099	16.1732	16.0896	16.1624	15.8717	0	0	0	0	0	0	16.4121	16.5183	16.5868	16.259	16.3768	16.345	16.2228	15.2732	15.3339	0	0	0	16.5312	16.7849	16.8956	15.2343	16.834	16.3892	16.9841	16.2443	16.506	16.8244	16.4057	15.8046	16.9317	15.7591	15.8733	0	0	0	0	0	0	16.651	16.4739	16.613	16.3703
SF3A2	15.6521	14.9771	15.2824	15.3168	14.7553	14.7747	0	0	0	0	0	0	15.1543	15.6618	15.5352	15.0015	15.2	15.0906	0	0	0	0	0	0	15.1907	15.4457	15.6	14.0036	15.7609	15.2128	15.5634	14.9799	15.3658	15.5337	14.6409	14.7393	15.5518	14.5851	14.5372	0	0	0	0	0	0	15.6632	15.2467	15.5456	15.34
SF3A3	16.2512	15.7877	15.729	0	0	0	0	0	0	0	0	0	16.0417	15.7585	15.7451	0	0	0	0	0	0	0	0	0	16.3118	16.3502	16.2089	0	0	0	16.4205	15.8048	16.1121	16.1321	15.7183	15.5078	0	0	0	0	0	0	0	0	0	15.8774	15.802	15.8077	15.7531
SF3B1	16.01	15.4822	15.5537	15.5534	14.7376	14.9033	0	0	0	0	0	0	15.9166	15.4636	15.6865	15.6507	15.1136	15.3921	15.4839	14.1002	14.2326	15.9542	14.1908	13.9905	15.8553	15.8874	15.8118	13.8431	15.79	15.1808	15.8354	15.5923	15.8052	16.7401	15.1421	15.3206	16.8256	14.5269	15.0574	0	0	0	0	0	0	15.4757	15.8118	15.6924	15.2806
SF3B2	16.3543	15.6981	15.9618	15.899	14.8718	15.2026	0	0	0	0	0	0	16.0706	15.8072	15.9995	15.9589	15.33	15.6861	15.6396	14.7158	14.7491	16.2216	14.4153	14.4732	15.7137	15.8601	15.8791	13.8563	16.0067	15.3801	16.221	15.6932	16.0387	16.8421	15.4264	15.6395	16.7925	14.3213	15.2426	0	0	0	0	0	0	15.8519	15.9145	15.8548	15.2984
SF3B3	16.6044	16.1454	16.2223	16.4086	15.4498	15.7798	0	0	0	0	0	0	16.7614	16.247	16.384	16.4013	15.8969	16.1956	16.7386	15.3379	15.5496	16.9594	15.402	15.284	16.7608	16.7092	16.6574	14.8716	16.5396	16.0173	16.7915	16.4834	16.7033	16.878	15.6438	15.905	17.2019	14.9291	15.4947	0	0	0	0	0	0	16.4133	16.4238	16.3903	16.1229
SF3B5	12.3435	13.2582	13.0892	11.805	12.6958	12.9418	8.97052	11.4912	9.11682	9.02807	12.5047	9.94387	13.5601	13.2674	13.3783	12.6083	13.0697	12.6205	13.4062	12.2017	11.9463	14.2976	12.133	12.0804	12.3847	13.3613	13.7846	10.7998	13.6321	12.9236	14.8067	13.5416	13.1884	12.5259	12.5796	12.5565	13.0431	12.5336	12.7658	10.1133	12.4819	11.1007	9.21975	12.7086	10.977	12.8147	13.6388	13.0946	12.6784
SGPL1	11.5427	13.8893	13.9926	8.16769	14.0429	13.6411	0	0	0	9.2667	0	9.70255	8.98432	9.21231	6.66037	0	0	0	13.1685	0	9.05558	13.3659	0	8.94414	13.7283	12.4305	8.27991	13.5104	9.26229	12.7315	0	9.67584	9.25492	9.96506	13.4761	13.7811	11.2401	11.9253	12.8465	10.7087	0	10.5662	0	0	0	0	0	0	0
SH3BGRL2	13.1952	11.8325	12.0816	13.2809	12.1887	12.4376	12.4398	13.1105	12.228	13.0528	13.6776	13.2045	13.6253	14.2274	13.8634	13.2959	15.2479	14.4767	0	13.3093	12.9344	0	12.898	12.8693	12.2878	14.1022	14.8149	13.5174	14.5897	14.1392	11.6561	13.8439	12.845	10.7186	12.0096	12.1897	11.7037	12.9032	12.4788	12.1275	14.0282	12.8382	12.3998	12.9957	12.7143	14.1066	13.6268	13.7292	14.212
SLC27A2	12.0601	15.3801	14.6024	9.52274	15.2342	14.5433	0	0	0	12.7979	0	11.8575	0	0	0	0	0	0	0	0	0	13.6149	6.8627	8.93917	15.1536	13.4918	0	14.0283	0	12.8013	0	0	0	12.2345	15.311	14.7	13.2635	14.6815	14.4794	13.0569	0	11.1426	12.4478	6.08438	10.4465	0	0	0	0
SLC2A1	13.4551	16.1251	15.6443	13.7104	16.192	15.9376	15.2781	14.028	14.8497	16.026	13.171	16.0074	0	0	0	0	0	0	14.9313	14.7594	14.7693	15.2579	14.7786	14.4042	15.0643	14.3206	12.7504	15.4338	12.0346	14.5827	0	0	0	13.8801	16.6315	16.0195	13.9273	16.5026	15.8947	16.2105	12.7971	15.466	15.5779	13.7206	15.2695	0	0	0	0
SLC3A2	11.5321	13.3602	12.9697	12.6918	13.7476	13.6121	13.6196	8.63749	12.6039	13.3022	9.42566	13.252	10.6183	11.8928	11.543	11.9743	12.1156	12.078	12.9437	12.8798	12.7323	12.707	12.8949	12.9671	13.537	12.8491	12.0782	14.1236	11.572	13.3103	0	0	0	10.1874	13.7947	13.8589	11.9185	14.1311	13.8119	14.1124	11.3725	13.7013	13.9442	9.80003	13.7159	11.7689	11.3346	11.5584	11.2107
SMNDC1	11.6713	12.2845	11.5586	10.4713	12.2554	11.2708	0	0	0	0	0	0	11.4577	8.46583	10.3956	11.1718	9.38759	10.7496	0	0	0	0	0	0	10.8811	10.3034	0	8.91289	8.14825	11.4524	0	12.5402	12.1469	11.1311	11.5278	11.5541	0	0	0	0	0	0	0	0	0	0	0	0	0
SMU1	12.8302	12.89	13.1227	11.5479	11.7461	12.5599	0	0	0	8.61484	13.3628	7.89778	12.0643	12.3821	12.1178	11.8964	7.77043	10.6352	13.1533	6.92291	11.0534	14.0519	7.69443	11.1695	13.2266	12.5176	12.023	10.3363	12.5761	12.1186	12.3721	10.3822	10.9577	12.3909	11.8582	12.5669	14.0514	9.07362	11.2133	5.41485	12.577	10.378	0	12.3219	8.30768	12.6257	11.2798	11.9472	11.0812
SNRPB2	14.3794	14.4116	14.3283	0	0	0	0	0	0	0	0	0	15.0726	14.3472	14.4952	14.2575	13.6056	13.9771	0	0	0	0	0	0	14.882	14.6283	14.4185	0	0	0	14.9261	14.7585	14.5025	0	0	0	0	0	0	0	0	0	0	0	0	14.0941	14.6395	14.3156	13.8272
SNRPC	13.4466	14.203	13.9926	12.8818	13.7574	13.908	11.521	13.5787	12.6275	11.8464	13.9983	11.7791	14.2719	13.2623	13.6904	12.0893	13.3983	12.9062	13.691	13.0989	12.5962	14.2155	11.6231	12.8198	14.6915	14.4088	13.9766	14.4934	13.8494	14.2564	11.8665	14.1595	13.653	13.1982	13.7967	13.5947	13.4838	13.1583	13.4929	12.4899	13.0645	12.5649	10.8462	13.2597	12.6131	13.3756	13.4553	13.2276	13.3325
SNRPD1	16.0788	15.9832	15.7293	15.8501	15.6392	15.5276	0	0	0	0	0	0	16.3773	15.7429	16.0222	16.0564	15.7101	16.0029	0	0	0	0	0	0	15.2504	15.5722	15.8858	0	0	0	0	0	0	16.6704	15.6741	15.5866	0	0	0	15.121	15.9513	15.289	14.8588	16.2842	15.0658	15.4811	15.8055	15.7283	15.6125
SNU13	12.2894	12.2557	11.3369	12.7161	12.3563	11.0043	9.14517	12.2258	9.84952	0	0	0	13.7058	13.1791	13.4853	13.3474	13.4435	13.1709	13.8381	11.3123	10.9033	11.6941	10.202	11.6573	13.184	13.168	13.7142	12.5652	13.3178	13.157	10.1965	13.5738	13.6808	13.158	12.9184	12.4274	12.9363	13.4945	12.4267	0	12.0229	10.8675	8.58081	11.6462	11.0717	13.4336	13.8426	13.5842	12.8353
SNW1	10.3086	12.7076	12.1021	9.70283	11.6403	11.0506	0	0	0	8.12704	10.8529	10.1123	10.8776	10.0796	10.8633	0	0	0	10.4748	9.69005	10.2581	11.3939	9.64158	10.5285	9.94536	9.33637	10.1672	10.4608	10.9134	10.6407	0	0	0	11.831	11.7441	11.3297	11.9296	10.4956	11.0506	0	0	0	0	0	0	10.0867	0	10.9468	0
SPATS2L	12.8383	13.8487	13.2286	12.1086	13.4413	13.2411	11.9381	12.7808	11.9744	11.3601	12.9897	10.3908	11.6537	10.3958	10.9437	11.6153	10.3566	10.9744	12.7442	10.3447	10.5559	0	11.7156	11.5845	12.5687	11.5139	9.89912	12.8635	10.2638	11.8389	0	11.872	11.3257	11.6479	13.2273	13.4181	11.3005	12.8287	12.9499	11.8065	0	11.0331	11.3644	0	10.9006	12.8139	11.5743	11.0398	0
SRP14	14.4359	15.6603	14.8509	14.0328	15.5096	15.2095	0	0	0	0	0	0	0	0	0	0	0	0	0	0	0	0	0	0	0	0	0	0	0	0	0	0	0	0	0	0	0	0	0	0	0	0	0	0	0	0	0	0	0
SRP54	12.5862	15.7395	15.795	11.9056	14.6577	15.2118	12.3949	0	10.6422	11.7813	6.9751	11.1336	5.73915	9.12882	6.85653	5.61406	8.09297	6.83384	14.4918	7.81346	10.813	14.9298	6.50246	10.2294	15.7581	14.52	10.1538	15.5943	9.76388	14.5891	13.1561	0	11.2582	12.7896	14.3676	15.1298	13.7647	14.1997	13.4882	12.7062	10.5088	12.1957	10.8952	9.89775	11.4035	7.12371	2.95722	5.12673	7.2723
SRP68	12.8011	15.3412	15.2242	12.0496	15.1687	14.6769	11.9167	7.57395	10.7724	11.6782	6.16764	10.5595	7.72417	6.5005	7.62768	7.78895	5.90318	6.52292	14.1625	6.8986	10.6891	14.416	7.36172	10.4714	15.4763	14.2191	8.8751	14.9265	9.38732	13.7867	0	0	0	13.4353	14.6577	14.502	13.3023	13.6745	13.8318	12.1491	0	11.82	10.5755	5.13369	11.1586	0	8.52339	6.4532	0
SRP72	13.9075	15.8301	15.8053	13.1484	15.2649	15.4299	12.2776	10.6451	11.8972	6.92609	8.8211	11.5344	8.61565	8.77137	9.30415	9.17411	9.51755	8.09368	15.1583	7.30012	12.0045	15.6397	7.11866	11.5498	15.8971	14.7343	10.9767	15.233	10.8575	14.3202	0	0	0	14.1286	14.836	15.0933	13.5895	13.5753	14.1813	12.7333	2.95777	12.6542	11.3839	10.6017	11.5331	9.33103	10.1133	9.46572	8.41009
SRP9	13.8763	15.1592	15.3157	13.7134	14.6637	14.6453	0	0	0	0	0	0	0	0	0	0	0	0	15.5333	13.1224	13.5922	15.439	13.4535	13.816	15.2827	14.5895	13.7819	0	0	0	0	0	0	0	0	0	0	0	0	0	0	0	0	0	0	0	0	0	0
SRPRA	12.3398	12.071	12.6355	11.1396	12.0994	11.5513	8.76555	8.88632	8.42032	0	0	0	10.5356	9.23689	9.57777	11.1409	7.32125	9.94114	12.8061	7.32571	10.0703	13.3494	7.1605	9.59305	13.7709	12.3602	10.2221	12.9845	9.54091	12.0667	0	0	0	11.4739	11.833	11.6418	11.8303	11.5716	10.6662	9.36443	9.96364	9.5858	9.45145	9.57162	9.13079	0	11.0194	9.83957	0
SRPRB	12.8449	12.8971	13.5102	11.6579	12.277	13.3382	10.475	10.5027	10.2003	9.7737	10.1642	10.4123	12.5187	10.1185	9.9356	11.7646	10.3863	11.3514	12.8449	0	8.49595	13.03	9.4668	10.2545	14.2523	13.6038	11.3683	14.1343	11.1155	13.5669	9.22104	11.654	9.48747	11.2277	12.5163	13.4177	12.4796	11.9321	11.9401	11.1727	10.1596	11.924	10.4526	10.4789	10.8328	8.31829	11.7773	9.85628	0
SRRM2	13.1791	14.6628	14.0819	11.9256	14.3455	14.1392	0	0	0	0	0	0	0	12.1872	11.693	0	0	0	14.0653	8.96819	10.9603	14.781	11.86	10.0186	13.6743	12.8627	8.80616	13.2733	10.8127	12.2526	0	0	0	0	13.4827	13.9063	12.4656	11.2675	12.7815	0	0	0	0	0	0	11.6269	12.8803	11.7836	0
SRSF11	13.2133	12.2202	11.8639	12.2949	11.3602	10.9672	0	0	0	0	0	0	0	0	0	0	0	0	0	0	0	0	0	0	0	0	0	0	0	0	0	0	0	0	11.2551	11.2381	0	10.217	10.51	0	0	0	0	0	0	0	0	0	0
SRSF7	12.2614	12.8306	11.9044	11.0813	12.52	10.9543	0	0	0	0	0	0	12.3794	12.0536	11.9078	12.9817	11.6755	12.4505	0	0	0	13.1235	10.9732	9.64865	12.7321	12.7751	12.5348	13.3118	13.045	12.7165	13.5336	13.0659	13.2184	11.8026	13.4446	12.2634	12.154	13.1849	12.9759	0	0	0	0	0	0	12.9615	12.8314	12.5576	12.4127
SSR4	13.0842	12.5754	13.8756	11.6145	12.803	13.1652	12.6128	0	11.4481	9.88233	12.7746	10.8883	11.5154	11.3706	10.5369	11.782	11.977	11.4334	13.7378	11.0203	12.3054	13.7444	9.27956	11.6559	14.2616	13.3026	12.6713	14.3915	11.872	13.9103	11.8031	12.5389	11.8118	11.5764	11.3194	13.7067	12.8359	11.5167	12.2564	11.4212	12.5869	12.1571	10.2181	12.0894	11.5907	11.661	12.5555	12.1031	11.5617
STARD10	11.4542	10.5953	11.4329	11.171	9.93106	10.7955	11.4385	11.1088	9.89438	9.80209	11.2686	10.5342	0	0	0	0	0	0	0	14.3755	13.423	0	14.9195	15.6856	9.56858	11.3654	0	9.28937	11.3793	0	0	0	0	9.95233	10.9295	10.2242	10.125	10.8091	10.469	11.8261	11.2905	11.1092	14.09	0	13.4155	10.9932	0	9.58901	0
STEEP1	13.1098	12.7626	13.898	12.4986	11.1085	12.5406	11.6039	12.1425	11.0504	0	0	0	12.7163	12.3598	12.2603	12.5684	12.0787	12.2252	13.7962	11.5687	11.9713	14.0516	11.2203	12.1054	12.5243	12.2627	11.8277	11.3999	12.592	12.4222	13.6421	12.6979	12.6311	13.5756	12.2207	12.8385	13.7487	8.65532	12.511	12.296	12.9007	12.3878	11.2769	12.8437	12.3244	12.0849	12.1233	12.1756	11.914
STT3A	9.06445	12.0078	12.0928	8.72506	11.9312	11.8494	0	0	0	0	0	0	0	0	0	0	0	0	10.0681	7.42962	9.4316	11.6107	0	7.92587	13.6612	11.5053	7.58489	14.1947	7.63118	13.0413	0	0	0	8.4358	12.1632	12.1457	8.52278	11.7024	12.1291	10.5461	0	10.4444	0	0	0	0	0	0	0
STXBP2	12.1918	11.946	10.8938	12.1967	9.7463	11.442	0	0	0	0	0	0	11.4825	10.8979	11.1838	12.2934	9.94323	11.3665	0	0	0	12.7243	12.2853	10.9941	0	0	0	10.7454	10.2506	9.78615	0	0	0	12.4806	10.1951	11.1495	11.9611	13.1415	12.5256	0	0	0	0	0	0	10.0527	10.8562	10.7297	10.6966
SUB1	15.7945	14.9726	14.8752	15.7419	15.3319	14.4788	14.9548	15.1413	14.7131	14.3417	16.1156	14.2476	15.9237	15.4648	15.7124	15.7158	15.3355	15.698	16.4648	15.8644	15.9666	16.4797	15.7158	15.1888	16.5397	16.2469	15.4614	14.2427	15.545	14.7964	15.1064	14.8098	15.6153	16.9041	16.0409	15.2428	17.1913	15.2267	15.475	13.9764	15.651	14.2584	14.0305	15.7656	14.888	15.4945	13.9542	14.7882	15.4124
SUGP1	11.6451	12.8099	11.8714	10.827	12.4787	11.3969	0	0	0	0	0	0	11.3908	11.4344	11.9812	11.6406	11.3749	11.6314	12.3963	9.36975	11.446	12.4393	10.3884	9.62109	12.4445	12.3673	12.033	11.8324	12.2241	12.327	12.2442	11.6513	12.2034	0	11.7428	11.2574	11.0142	12.2273	10.7493	0	0	0	0	0	0	11.2853	11.4218	10.8794	11.5274
SUMF2	12.296	11.5705	12.1625	0	11.5289	12.3383	0	0	0	0	0	0	0	0	0	0	0	0	0	11.6381	10.9087	0	12.2007	10.4084	0	0	0	11.0462	0	10.2969	0	0	0	0	0	0	0	10.2376	10.4887	0	0	0	0	0	0	0	0	0	0
SUMO1	11.5368	13.8777	12.8944	12.1749	13.516	13.2082	12.0503	0	11.207	10.0758	9.71244	11.2027	10.6439	11.2934	11.6305	11.267	11.2389	11.1994	12.7482	11.7027	11.5019	14.3985	12.5575	11.8081	14.993	14.3221	11.7327	12.4395	11.8366	12.4635	0	0	0	0	13.2798	13.059	12.496	12.6302	12.819	10.4674	9.64602	11.7027	11.9174	10.752	11.6515	11.6702	11.3859	11.7159	11.2668
SUMO2	11.9985	13.6468	12.4043	0	11.3614	11.7309	12.2598	0	12.8907	0	0	0	0	0	0	0	0	0	0	12.821	13.3993	13.5198	13.7182	13.914	0	0	0	13.6861	0	12.5381	0	13.2356	11.9682	12.1597	11.4731	12.0198	13.2163	9.73854	12.595	0	0	0	11.2902	11.8917	12.1432	0	0	0	0
SUPT5H	10.6893	9.31052	9.87679	11.3563	10.2599	9.28351	0	0	0	10.342	9.67204	9.04661	11.0149	9.89301	10.9456	11.4265	0	10.1801	0	0	0	0	11.7751	10.6402	10.8627	10.0571	9.79909	8.97589	10.2158	9.82946	0	0	0	10.6815	10.8333	9.23649	9.84775	11.3589	10.1864	9.34498	10.4988	10.7917	0	0	0	10.4459	11.5731	10.6206	10.6238
SURF4	11.8447	12.6179	13.1484	12.3915	12.2562	13.2495	12.4453	9.715	11.0482	0	0	0	0	0	0	9.05658	9.46031	9.35589	13.5568	11.5054	10.9318	14.2233	11.3618	11.6306	14.4285	13.05	8.39309	13.6511	0	13.5445	0	0	0	12.5487	11.8363	13.3774	12.0661	0	12.1475	13.1008	0	12.3096	12.1747	10.2807	12.7842	7.1334	9.36978	9.57369	0
SVIL	6.79597	4.33135	4.91148	6.54484	4.66878	5.47117	14.2416	6.78503	13.324	13.7106	5.91535	14.8014	7.52381	7.81609	7.61839	7.94075	10.3153	7.66874	0	14.9509	14.2892	0	14.7004	14.4796	0	6.97936	9.33157	4.24291	9.2602	8.30198	0	0	0	0	5.52906	4.38078	6.0735	7.01887	9.93252	14.912	4.98639	14.3468	14.4897	7.01067	13.9539	8.03386	6.58562	7.25663	7.13622
TAF15	13.0989	14.5342	14.3508	13.3349	13.6433	13.7921	12.578	13.1335	12.3521	12.9867	13.6817	13.2414	0	0	0	0	0	0	14.5154	12.3568	12.9814	14.775	12.5211	12.9331	13.0412	12.9559	13.0042	13.9254	14.0026	14.0359	0	0	0	12.8168	13.5046	13.5547	13.1033	12.844	13.0911	12.6875	13.0022	12.6737	12.4179	12.913	12.5418	13.1298	12.6296	13.0596	12.7767
TAF4	12.7884	0	11.8826	12.2764	0	10.8256	12.3885	13.0533	12.8342	0	13.0644	10.7703	13.3642	13.2112	12.6814	13.6274	13.1069	13.5143	12.8675	11.6966	11.3746	0	11.8434	11.4555	11.3951	12.5147	13.4731	13.6784	12.6311	13.3533	12.5229	13.7101	13.6942	12.2487	12.0779	12.5202	13.1878	0	10.7442	12.7479	13.2314	12.7838	11.7179	11.489	11.6098	12.4274	13.9591	13.5684	12.9732
TARDBP	10.5775	10.6605	10.4168	10.5158	11.8418	10.4017	5.80186	10.1393	9.50073	9.96201	0	8.8145	9.96841	11.0044	11.1061	10.8514	10.936	10.4703	0	0	0	0	9.46286	9.92496	9.85142	10.4744	11.1608	11.9897	10.9975	11.53	0	12.0166	11.2044	0	11.7768	10.6376	9.723	12.4028	11.5793	0	0	0	0	0	0	11.5385	11.5259	11.8265	10.8217
TBRG4	11.4962	13.1291	12.3417	10.6077	13.5603	12.6221	10.1144	12.5908	11.9473	12.503	12.6339	12.743	14.4213	11.5106	12.7177	14.8855	7.14771	13.7821	0	0	0	0	10.6172	9.88965	11.448	9.46797	9.05543	13.549	11.1517	12.7181	12.1421	9.36992	11.4892	0	13.8018	13.3923	10.4117	14.1414	13.9797	12.4927	0	10.8225	11.9162	11.5585	10.9884	0	15.1975	14.0399	12.6769
TCEA1	12.0552	14.0937	13.8141	12.0884	13.7757	13.6473	11.8622	9.99105	10.9042	13.6348	9.78838	12.9589	10.543	11.8914	11.407	10.8346	11.2211	10.7713	11.8458	11.5557	11.3522	12.7258	12.3875	12.0085	12.5485	11.8972	11.4901	12.9451	12.2923	12.637	0	0	0	11.9084	13.8761	13.4357	12.8126	14.2278	13.6349	12.5333	10.9125	11.8835	12.1482	9.97896	11.4825	11.1674	11.2213	11.7748	10.4313
TCERG1	12.599	13.189	13.3893	13.118	10.6745	11.8734	0	0	0	0	12.9207	10.1624	11.455	12.1805	11.4978	10.8774	10.5047	10.68	12.4534	11.3549	10.2789	12.5354	10.9263	10.6708	13.6352	12.5595	12.4554	10.6806	12.7404	12.186	0	12.2816	10.5668	14.8364	12.1279	12.8585	15.3409	10.837	12.3228	8.62368	12.4846	10.4334	8.52015	11.6258	9.74105	11.8382	9.37995	11.689	8.85353
TCOF1	12.4986	14.7942	14.5887	12.4642	14.7457	14.3696	0	0	0	0	0	0	0	0	0	0	0	0	0	0	0	0	0	0	0	0	0	0	0	0	0	0	0	0	0	0	0	0	0	0	0	0	0	0	0	0	0	0	0
TCP1	16.2302	15.5798	15.7044	0	0	0	15.1969	15.6987	15.1436	0	0	0	15.7165	15.9157	15.7538	0	0	0	0	0	0	0	0	0	0	0	0	0	0	0	0	0	0	0	0	0	0	0	0	15.4294	16.4913	15.5816	15.1286	16.1185	15.4543	15.7525	15.8268	15.6782	15.9767
TECR	9.40434	14.6486	14.3101	8.14052	14.5419	14.3492	11.1572	0	9.32801	10.1487	0	11.0216	0	0	0	0	0	0	10.8923	8.09977	9.136	11.716	8.83116	10.2629	14.2381	12.8864	5.94301	14.3826	7.658	13.1329	0	0	0	7.824	14.88	14.7695	9.70184	14.0866	14.2808	13.0999	0	11.8684	11.6005	0	11.276	0	0	0	0
TGFBRAP1	11.7652	12.3853	11.8231	10.8644	12.6968	11.7967	0	0	0	0	0	0	11.1221	12.0029	11.7313	11.6407	10.3602	10.9214	0	0	0	0	0	0	9.9844	10.6576	10.7107	10.2769	12.0644	11.4089	0	10.5665	10.7373	0	0	0	0	0	0	0	0	0	0	0	0	11.14	10.8582	11.188	11.0757
TIMM13	8.93655	11.2973	10.8349	0	11.8824	11.8403	0	10.9035	9.44132	9.02285	11.3048	10.236	0	10.0965	9.15019	0	11.6233	9.81249	0	11.596	10.4776	0	12.1477	11.6278	9.359	10.8157	11.682	11.0583	10.7688	10.8123	0	0	0	0	11.2303	11.2016	0	8.91591	11.4361	10.8446	0	9.71816	11.6364	0	10.6617	9.00161	10.4647	9.18266	0
TJP1	12.2718	11.5786	10.7669	10.6702	10.2974	9.16929	9.90188	11.211	10.762	13.0809	10.9851	12.7385	12.8982	13.493	12.6308	12.4269	11.3415	12.0304	0	10.3309	10.1579	0	10.4077	9.01846	9.73207	11.2193	12.1477	14.2758	13.5774	14.1128	0	11.1704	11.0312	0	10.396	11.5791	11.1147	12.2452	10.7884	9.11044	10.4539	12.2749	10.9591	11.3397	10.4978	12.774	12.7814	12.5117	12.532
TK1	10.2479	12.0412	11.7077	9.81405	12.0136	12.024	0	0	0	11.9548	0	11.6424	10.6837	10.522	9.80041	9.99795	11.0355	10.588	0	10.0176	9.88198	0	8.77737	9.39139	10.0215	10.5743	11.1233	10.3645	9.71577	10.4757	0	0	0	0	11.9269	11.791	10.8644	10.6061	11.6609	10.3434	0	10.2373	10.5056	0	10.0261	10.2201	9.96939	10.0851	9.9447
TM9SF4	9.44985	10.044	8.4391	0	10.2583	8.67288	0	0	0	0	0	0	0	0	0	0	0	0	0	0	0	0	0	0	11.565	6.21622	0	0	0	0	0	0	0	0	10.7682	11.3309	5.57174	8.93136	9.92852	0	0	0	0	0	0	0	0	0	0
TMEM109	13.1331	13.0857	12.8361	13.2823	13.3773	12.5852	0	0	0	0	0	0	9.7524	9.56448	10.2867	11.2341	9.38757	10.6916	15.1195	0	12.585	15.0085	11.3942	9.83043	14.6445	14.2005	12.201	14.1693	9.39874	13.5493	0	0	0	14.8727	13.5643	12.6338	14.5998	11.6847	12.4119	0	0	0	10.791	10.4487	8.48502	8.84182	11.1991	9.42821	9.00146
TMEM214	11.167	11.2963	11.5071	10.2331	11.8702	11.5607	0	0	0	0	0	0	0	11.0919	9.84283	10.6138	10.3158	9.867	11.3248	9.5029	9.54817	12.0175	10.9061	10.1935	12.1796	11.6332	10.928	13.7228	10.7869	13.0731	0	12.3014	10.9021	10.7812	10.1277	11.5756	12.3825	11.7558	11.1169	9.75782	10.2471	10.1536	0	0	0	9.53134	10.1418	9.66906	0
TMEM33	9.32515	14.496	14.168	11.6859	13.4324	14.1585	11.2699	0	10.242	0	0	0	0	0	0	0	0	0	13.4781	9.37911	10.125	13.3846	0	10.0657	14.7957	13.5625	10.2678	15.3143	7.73775	14.2987	0	0	0	0	14.0757	14.3489	11.9145	12.0352	12.8616	10.3088	0	12.3246	11.4083	0	11.1775	0	0	0	0
TMEM97	12.708	14.4289	14.0018	12.0952	14.4545	14.039	0	0	0	12.6863	0	12.8275	0	0	0	11.581	9.26101	11.3789	0	0	0	0	0	0	13.9191	12.7498	9.18118	12.6333	0	11.3593	0	12.8175	13.4003	13.328	14.4417	13.9297	12.9834	14.1693	13.8897	11.8111	9.55036	10.7377	0	0	0	0	0	0	0
TNFAIP8L1	10.1891	12.875	12.1394	0	11.8416	12.0543	0	0	0	0	0	0	0	0	0	0	0	0	0	0	0	0	0	0	0	0	0	0	0	0	0	0	0	0	12.6617	12.558	11.0602	11.5496	11.5247	0	0	0	0	0	0	0	0	0	0
TNPO1	8.75502	13.405	13.5748	11.2388	13.3962	13.8238	12.7081	0	11.8629	10.5187	0	10.1908	0	0	0	6.28797	10.0821	8.19719	13.5947	11.7322	11.8377	13.5876	12.0309	12.7819	13.4669	12.0953	9.66982	13.4517	8.73884	12.0011	0	0	0	9.17581	13.0736	13.2164	11.3512	12.7608	12.7873	12.4035	0	12.1898	12.9454	0	12.8208	8.61235	6.59598	7.37704	7.61556
TOMM70	9.78991	9.78097	10.1976	0	10.0459	10.8018	0	0	0	11.4115	0	10.0485	0	0	0	0	0	0	9.87742	11.4478	9.47943	0	0	0	11.2826	10.9148	0	15.1753	10.7806	13.8916	0	0	0	0	13.0288	12.453	0	14.5688	14.5688	0	0	0	0	0	0	0	0	0	0
TOP1	7.75682	12.1235	12.4449	0	0	0	0	0	0	0	0	0	0	0	0	0	0	0	0	0	0	0	0	0	11.7316	10.9868	10.1998	0	0	0	0	0	0	0	11.8155	11.0449	10.62	10.9669	11.6342	0	0	0	0	0	0	0	0	0	0
TPP1	12.8568	13.6077	13.4231	12.4853	13.797	13.0121	12.2708	12.8332	11.8604	13.8629	12.6912	11.9493	12.1607	11.9172	11.4939	10.9554	11.8544	11.6492	11.2006	12.2551	12.0477	0	12.1918	12.3269	12.5043	12.5088	11.8246	12.6195	11.0243	12.181	0	0	0	0	13.3846	13.2176	11.2178	14.2698	13.7075	12.0628	12.1708	11.3654	11.8975	0	11.8717	0	0	0	0
TRIM25	8.09872	11.3467	10.8985	0	11.971	11.1164	0	0	0	12.205	0	11.1996	9.89483	7.92279	9.51098	0	0	0	0	9.76292	9.08749	0	11.1543	9.87462	0	0	0	9.91719	0	8.95575	0	0	0	0	12.2563	10.2276	0	11.401	10.4047	12.0098	0	10.4503	0	0	0	0	0	0	0
TRMT10C	9.55817	12.7118	11.5342	8.59727	12.5084	12.3883	0	0	0	10.7994	0	10.1587	9.73721	8.35559	8.80608	11.0419	6.50166	8.50457	0	0	0	0	8.90231	7.39703	10.8036	8.29609	7.5809	10.0639	7.85599	9.2942	0	0	0	7.9279	11.91	11.6425	9.10489	12.4576	12.3551	9.57416	0	8.90372	9.58457	0	8.28695	7.93855	12.1168	10.5775	0
TSR1	10.9221	12.1445	12.5832	9.79878	12.4317	10.9567	8.9542	9.92327	9.1344	10.6301	9.79217	8.84483	13.4957	11.2568	12.7697	13.6128	10.8068	12.7094	11.4165	10.0814	10.0105	12.0549	9.55225	10.3168	13.8358	13.2952	12.175	12.8964	11.9604	12.7844	9.71461	13.4242	12.3541	11.5932	12.1599	10.9522	12.8371	10.9494	12.0405	10.7429	9.40559	10.1611	9.93892	9.80353	11.4086	9.29144	13.6171	12.5039	9.68954
TUBA4A	10.3458	11.5244	12.4775	0	0	0	0	0	0	0	0	0	0	0	0	0	0	0	0	12.272	12.3252	0	13.8765	13.8442	0	0	0	11.2515	9.17844	10.6745	0	0	0	0	0	0	0	0	0	11.0851	0	10.5857	12.3808	0	11.299	0	0	0	0
TUBB	16.9581	17.9925	17.5051	16.9735	18.0522	17.9834	16.9014	15.7851	16.2723	0	0	0	0	0	0	0	0	0	17.4328	16.4613	16.9172	17.3115	17.0627	17.0197	0	0	0	17.7498	16.1157	17.2181	0	0	0	17.1294	18.3267	18.2078	16.7855	17.7228	17.8307	17.0194	16.4462	16.5349	17.0825	15.8782	16.8224	0	0	0	0
TUBB2B	11.2502	10.5795	11.6372	12.2625	0	10.6612	0	0	0	0	0	0	11.429	11.705	11.9206	11.7603	11.2491	11.677	0	0	0	0	0	0	13.932	13.4606	11.995	14.0218	12.4542	13.3385	0	0	0	0	0	0	0	0	0	0	0	0	0	0	0	11.7972	11.9892	11.7158	11.7497
TUBB4B	17.3128	18.0199	17.8593	17.419	18.2562	17.9748	17.6293	16.3354	17.1544	0	0	0	0	0	0	0	0	0	17.8056	17.2931	17.5036	17.8353	17.654	17.7531	18.0828	17.5007	16.7682	18.3165	16.9265	17.799	0	0	0	17.168	18.2547	18.13	17.251	18.068	17.9369	17.6501	16.9652	17.3358	17.8131	16.5658	17.6754	0	0	0	0
TUFM	14.0466	16.0432	15.7549	14.502	15.491	15.6876	0	0	0	0	0	0	0	0	0	0	0	0	0	0	0	14.5813	14.4804	14.4939	0	0	0	0	0	0	0	0	0	12.9576	15.3459	15.362	13.8079	15.5874	15.1655	14.733	13.8868	14.4025	0	0	0	0	0	0	0
U2AF1	12.3265	13.4336	13.2994	11.7001	12.7416	12.501	11.253	10.2124	9.60492	11.4015	11.4902	11.3989	12.3114	12.0493	11.8981	12.1207	8.65562	11.1653	12.8508	11.2735	11.9734	12.7607	11.6259	11.6722	13.2779	12.4807	11.7495	12.3109	12.127	12.2765	11.2327	12.52	11.9541	12.6403	13.193	12.8931	14.2329	12.6238	12.9681	11.552	12.8744	12.2249	11.3325	12.4704	11.5532	11.3026	12.3072	11.6697	11.0409
U2AF2	14.2134	14.9638	14.0434	14.0062	13.5192	13.5598	10.543	12.1288	9.8255	9.31954	14.2629	11.5202	12.5413	13.6607	13.0893	12.4564	12.1659	11.9087	15.3226	12.7626	13.3607	15.9507	13.6001	13.5259	15.9523	14.8409	13.8932	13.3389	13.9296	13.8166	13.8773	12.6298	11.9962	15.4432	14.1579	14.2465	16.702	11.8365	14.2111	12.2294	14.5655	12.8105	10.7706	14.7296	12.8443	13.3999	12.2299	12.323	12.9997
UBA2	13.9662	11.7741	14.4102	8.52572	12.3891	11.2134	0	0	0	11.6429	14.0547	11.4032	14.3451	13.2279	12.861	13.4388	13.4989	14.3482	13.4828	13.7427	13.541	13.8747	14.0217	14.6339	14.0522	14.2491	14.4705	0	0	0	0	14.957	13.6253	13.6782	10.4784	11.6905	14.0425	10.6423	11.2623	13.8499	0	12.228	14.7168	14.0839	13.8772	14.2386	14.0621	14.0042	14.0599
UBAP2L	9.97542	10.6549	11.1158	9.1605	11.4643	10.4393	8.66037	10.0751	9.38379	0	0	0	10.4948	10.9307	10.6611	10.9956	11.6101	11.0092	9.57975	10.5158	10.3374	0	8.38705	10.5147	11.6879	11.1702	10.7521	12.4419	11.4401	12.0806	0	11.5109	10.9257	0	11.0934	10.0615	0	11.3138	10.9611	0	0	0	0	0	0	9.91863	11.3038	10.3066	0
UBE2I	12.4962	13.9715	12.5839	12.8803	12.2519	12.0849	11.8407	11.7462	11.4702	10.7014	10.9031	10.7393	0	12.4213	12.0749	9.32138	14.3864	13.2907	11.8228	11.6775	11.5124	13.6383	12.2841	12.4999	15.5102	14.917	13.75	14.0885	12.5893	13.8866	0	11.0293	11.4784	11.9094	14.4201	12.8056	12.3201	11.5011	10.523	11.0965	11.9666	11.2868	11.6629	11.5046	11.1318	12.2776	10.8451	11.0787	11.6205
UBLCP1	14.7482	14.8401	13.7732	15.3692	15.1729	15.0137	15.5404	14.2644	14.2225	16.3939	14.2298	15.2951	13.3859	15.6312	14.5865	0	0	0	0	16.9439	16.0581	0	16.7822	15.8123	0	0	0	11.7718	14.7435	14.0727	0	0	0	15.249	15.7859	15.9122	15.4322	16.0837	14.9791	16.87	15.4108	15.4832	16.0261	15.1595	15.3481	15.6532	13.3463	14.7785	16.0611
UBTF	12.8381	14.0124	12.2882	12.8567	12.4419	12.84	11.9439	12.0196	11.8029	12.2593	12.8836	12.2197	11.5033	11.5194	11.248	11.0617	13.0097	12.5863	0	12.098	12.0009	0	12.3271	12.0876	10.9493	12.126	12.8754	11.4782	12.7852	12.3748	0	0	0	0	11.7626	12.4518	12.7217	12.0965	11.8647	0	0	0	12.5464	12.5988	12.4357	12.3297	11.6513	11.7618	12.6011
UFD1	11.6409	10.6558	11.504	12.8261	11.5422	10.5596	10.8806	12.6298	9.25387	0	12.2459	10.4308	12.398	12.4399	11.4794	8.77821	12.6565	13.0282	0	0	0	8.92846	11.4003	10.9588	11.6593	11.6935	13.0354	14.7524	12.5037	14.1427	0	12.0717	12.2591	0	0	0	0	0	0	10.2182	11.5395	10.8032	10.4485	0	11.1613	11.3946	10.4729	10.0673	13.07
UFL1	14.7125	14.1184	14.3042	14.325	14.4416	14.1943	0	14.2672	13.0525	0	0	0	0	0	0	0	0	0	13.5038	0	12.1705	0	0	0	0	0	0	14.3357	11.7115	13.1994	14.7515	14.9336	15.2989	13.5671	14.3902	14.0286	12.1591	14.8961	14.218	0	0	0	0	0	0	0	0	0	0
UPF1	9.73574	12.3283	11.7306	11.0767	12.9487	12.5061	11.9837	0	10.1041	12.9748	9.49055	12.7416	9.81704	11.5407	11.8057	11.2267	10.4952	11.1086	0	11.5178	10.4553	10.7812	12.8222	12.1069	10.457	10.5311	10.7449	10.6699	11.4814	11.3836	0	0	0	0	12.95	12.1792	10.999	12.8913	12.9243	12.6918	9.62831	11.9685	12.87	9.09503	12.0863	11.2184	10.5945	10.9062	8.75614
USO1	10.5112	12.2341	11.5275	10.7267	12.2806	12.0265	10.9508	0	10.9939	11.4712	9.05696	9.40957	10.5604	11.4021	11.1043	10.7723	11.5018	11.1697	0	11.5744	10.8423	0	13.5626	12.3483	9.53801	10.3587	11.117	9.56435	10.8168	10.5877	0	0	0	0	12.802	12.2471	10.2069	12.8038	12.5045	10.7874	10.4007	11.4574	11.6278	9.85932	11.2151	11.1388	10.9981	11.764	11.1421
USP22	9.10345	13.5697	11.9912	9.04416	13.389	12.8023	0	0	0	9.24116	0	8.0601	0	0	0	0	0	0	9.99901	6.88121	6.80671	0	0	0	11.3057	9.74071	0	11.804	8.22607	10.4763	0	0	0	9.28992	13.4146	12.8403	10.6674	12.9329	12.2037	9.87206	0	8.20156	0	0	0	0	0	0	0
USP7	9.81733	12.0583	12.391	11.3794	12.6043	12.2604	12.0831	0	11.4973	9.85522	0	10.4924	0	0	0	8.33831	9.16128	10.6651	0	11.4447	11.2638	0	11.9643	12.2298	12.7554	11.952	11.0253	11.4747	9.94547	11.449	0	0	0	0	12.6895	12.1021	12.1098	11.8398	12.1421	11.0802	0	11.8965	11.119	0	11.5669	10.6424	10.7501	10.3273	0
VIL1	16.1455	16.5225	16.5615	16.4682	16.248	16.249	16.4716	16.4029	16.3665	16.9211	16.5479	17.3717	16.3451	17.4721	17.2675	16.2573	19.0701	18.2455	15.7518	18.0495	17.9619	15.4669	17.5241	17.3329	15.102	18.0684	18.7207	15.0551	18.2602	17.5497	16.3182	16.3526	16.4622	15.9351	17.0765	16.961	15.894	15.9143	16.2281	17.1238	17.0722	17.0009	16.8608	16.5487	16.8216	18.3383	16.2202	17.6114	18.239
VPS11	14.2797	13.749	13.9469	13.6196	12.8958	14.7391	12.7282	15.0207	12.7275	11.7817	14.2976	12.2258	14.6703	14.592	14.9877	14.2604	12.092	13.0607	12.4596	15.3912	12.4679	13.5475	11.4861	11.28	13.0532	13.4244	12.8414	12.2708	15.4962	14.0234	13.0197	13.1748	13.0198	13.6372	12.1342	12.033	14.0966	12.3357	12.4624	11.6515	14.0821	9.07366	0	14.3164	14.0851	14.9033	14.1385	13.6167	15.2224
VPS16	12.4959	12.6098	12.4183	11.8028	13.3682	12.3418	10.4013	10.5649	10.8495	11.2352	11.3222	9.78327	12.0963	12.0504	12.3113	12.0646	11.3284	12.127	12.2164	9.80123	10.4477	12.211	8.88725	10.2469	12.2647	12.7869	12.0009	11.8525	12.3625	11.8321	0	11.1853	11.2588	10.72	10.6704	11.0096	11.6277	10.3995	10.7247	0	0	0	9.35629	10.4501	0	11.296	12.3086	11.7092	11.0156
VPS18	11.6741	11.2384	12.2806	0	11.8223	12.5768	0	0	0	10.2476	0	10.3001	11.7741	11.5075	11.9425	11.2248	0	10.7381	0	0	0	0	0	0	12.2178	11.9507	11.1961	12.005	11.9391	11.9962	0	0	0	0	9.5202	9.89214	0	0	0	0	0	0	0	0	0	10.3364	11.6109	10.8035	8.88883
VPS33A	12.7276	11.7836	12.1408	12.1181	12.066	12.3707	11.6574	10.6342	10.7054	10.3786	10.7259	10.0329	11.6636	12.7371	12.2852	11.8784	11.7707	11.3344	11.2834	9.52786	10.3112	11.0778	10.2262	9.75953	12.4278	12.297	12.479	12.3579	12.9796	12.3896	9.74804	10.6324	9.55618	10.5783	10.8442	11.0338	11.4342	10.0768	10.5893	10.0415	10.6779	10.3194	9.34573	0	10.1589	12.0576	11.6726	11.67	11.6961
WASHC5	10.2476	8.68524	11.0344	0	0	0	0	0	0	0	0	0	11.0564	11.3769	11.4294	11.106	10.9017	11.1691	0	0	0	0	10.6924	9.6294	9.66677	11.1404	11.6571	9.82943	11.54	11.3593	0	0	0	0	0	0	10.5618	9.67592	9.38433	9.67767	9.73373	10.4414	0	0	0	10.9715	11.6558	11.4949	10.7297
WBP11	10.9311	12.7816	11.8447	9.72792	13.1666	12.1949	10.4864	9.70506	9.07125	10.4123	10.4748	10.2925	13.0153	10.9841	11.6409	13.015	10.7052	11.8867	9.88842	11.544	9.94851	0	10.5	10.0233	0	0	0	10.3763	12.4608	11.3796	0	12.6272	11.6948	0	13.0395	11.734	12.3234	13.2524	11.9847	10.1265	10.2288	8.78113	10.9104	10.9151	10.9825	8.97945	13.8195	12.2442	9.6737
WDR1	10.8085	8.49536	8.39802	13.0194	11.2285	12.4272	14.4423	10.6364	13.2754	14.8459	0	14.3805	6.53883	13.4778	12.464	11.203	12.9936	12.2152	0	14.6686	14.5438	0	15.0398	14.8278	8.94446	11.5204	12.7969	8.88299	12.9755	12.1834	12.284	7.91196	10.9062	11.1008	11.4206	12.0581	10.6947	13.1595	12.6473	14.7657	12.7252	14.2944	15.1485	11.4108	14.79	12.8606	6.22899	10.0701	12.3272
WDR26	11.1573	11.7033	10.162	10.6971	11.9909	11.3561	0	0	0	9.89118	9.54483	9.04756	12.032	11.7062	11.3953	11.169	11.9155	11.2916	12.0028	10.4497	9.98655	0	11.7846	10.3298	9.20986	10.9977	11.8386	7.2854	12.7748	10.837	0	11.6601	11.6482	0	12.274	11.3728	11.0258	12.3739	12.1788	0	0	0	0	0	0	10.7566	11.9798	12.2032	11.21
WDR48	12.3108	13.2524	12.5493	12.5534	12.8017	12.7404	12.4479	0	11.7035	13.0372	0	12.724	12.602	12.0251	0	0	0	0	0	0	0	0	0	0	0	0	0	0	0	0	0	0	0	0	13.0278	12.9634	13.4756	12.5604	12.7525	12.6651	0	12.9329	12.9689	0	12.618	0	0	0	0
WDR5	12.1605	11.3337	11.8522	12.197	11.0128	11.3525	8.99791	10.758	8.52806	11.6305	10.5946	8.66649	10.4993	11.0089	10.109	9.29138	12.1112	10.7931	7.95797	9.75543	9.78519	0	9.13422	9.86051	11.1525	12.5305	12.8724	15.3316	12.1166	14.5421	0	0	0	12.4098	11.7681	11.5412	12.3633	12.1619	10.1156	8.74308	11.4776	9.48789	7.56499	10.8114	8.89165	11.459	11.324	11.4088	11.6409
WDR61	14.3969	14.5117	14.5084	14.1489	14.4502	14.6552	0	0	0	0	0	0	0	0	0	0	0	0	0	0	0	0	0	0	14.1509	14.2981	14.3607	13.7317	14.2901	14.1873	0	0	0	0	0	0	0	0	0	0	0	0	0	0	0	0	0	0	0
WDR82	13.5494	14.5799	14.0705	13.2417	13.5989	13.6026	11.0044	12.7584	11.2363	11.4571	13.599	11.895	12.6016	13.2719	13.1194	12.2132	13.1299	12.7829	13.9233	12.7348	12.4147	15.1056	12.9384	12.29	13.9353	13.6919	13.434	13.6293	13.997	14.0402	13.6326	12.5298	11.9494	13.8875	13.8736	13.7316	14.4304	12.7025	13.4437	11.9633	13.8025	12.5394	10.8664	13.0241	11.0854	13.6131	12.3855	13.2453	13.1491
XIAP	10.7479	12.1338	11.7601	10.777	12.3303	11.213	0	0	0	9.37099	10.7836	10.5294	12.184	13.177	12.5791	11.5452	12.813	12.3516	0	12.8475	11.8096	0	12.1727	12.3131	11.304	12.4062	12.8045	10.2974	13.0027	12.2527	0	0	0	0	12.5001	10.9097	11.2808	12.3429	12.1676	0	0	0	9.06113	11.0051	10.0986	12.138	11.5008	12.0857	12.2376
XPNPEP1	8.6872	12.2924	11.8094	10.02	13.0886	12.682	10.5774	10.7861	8.98783	10.8955	0	9.91825	0	0	0	0	0	0	0	0	0	0	13.2421	12.2439	12.2264	10.6225	0	11.6721	0	10.1651	0	0	0	0	11.9216	12.211	10.8329	11.9233	11.4401	11.392	12.5675	10.3322	12.3882	0	9.78657	0	0	0	0
XPNPEP3	11.6267	10.7514	11.3287	12.0639	10.5293	11.6064	11.1655	10.9134	10.8061	0	0	0	11.0459	12.6133	12.2405	11.6005	12.0875	11.8778	0	11.7658	10.9714	0	12.1373	11.9492	11.2397	12.1229	12.5833	9.38747	12.7356	11.9125	0	0	0	0	0	0	12.3279	0	11.5226	12.3536	0	11.3148	11.336	0	11.4502	12.2039	10.3571	11.6587	11.8484
YARS1	8.64064	13.5277	12.8011	10.8957	13.7491	13.5064	11.3628	0	10.2754	11.9206	0	10.715	0	0	0	8.49237	8.59171	6.61678	0	10.9879	10.6557	0	12.9538	12.5108	11.3467	10.3866	0	10.6502	6.24314	10.4921	0	0	0	0	13.4094	12.4825	0	13.081	13.0908	11.2642	0	11.3327	12.8582	0	11.5076	0	0	0	0
YARS2	12.2172	11.3365	11.3301	10.963	11.1696	10.0692	0	0	0	12.9502	12.2286	12.3342	12.4677	11.235	11.7133	12.7161	0	11.3614	12.6141	11.919	12.0358	12.7754	9.20708	10.6755	12.3925	12.0792	10.2127	13.2698	11.898	12.3739	12.3975	12.6719	12.8896	0	12.2001	11.5146	13.282	13.9963	12.4804	0	0	0	10.0963	11.0752	11.6537	10.666	12.4644	11.8688	0
YWHAG	13.8576	15.0916	14.9856	14.1988	15.4072	15.0351	15.0768	13.8635	14.8163	15.3848	14.0849	14.9573	0	0	0	0	0	0	14.9341	14.297	14.276	14.8789	14.9089	14.702	0	0	0	0	0	0	0	0	0	13.1904	15.1437	14.8679	13.2623	15.4447	14.891	14.6494	13.7887	14.549	15.1045	13.7181	14.8681	0	0	0	0
ZC3H15	11.817	12.5206	11.3696	10.3933	11.8496	10.4458	12.0343	10.1071	11.1401	10.5505	0	11.1632	11.2401	10.904	11.3839	12.0326	11.1774	11.2845	12.6004	11.1601	11.3775	12.7262	10.7858	11.7105	12.011	10.3884	11.4471	12.3813	11.3952	12.0996	0	12.3982	12.1542	11.9782	12.5721	11.2497	12.2813	12.6779	12.1889	0	0	0	0	0	0	10.6048	11.738	11.1091	11.5138
ZNF207	13.7038	14.1086	13.8371	13.2561	13.0209	13.2909	10.0135	13.7848	12.1521	0	14.2867	11.3884	13.7612	13.2674	13.4932	13.364	12.9765	13.257	13.1696	11.8174	11.9787	14.4564	12.5057	12.4204	14.3581	13.9466	13.3971	13.8067	13.5895	13.7973	13.8407	13.7585	14.0637	13.065	13.1561	13.4047	13.2033	10.6262	13.3247	10.7146	13.671	12.5426	10.1897	14.1223	11.7208	13.4269	13.4242	13.5433	13.0143
ZW10	9.71373	11.9847	11.6966	9.55877	12.2957	11.9096	11.7832	10.3746	11.4977	11.4891	10.0236	11.0267	9.61125	11.2475	11.4535	11.1339	10.7502	10.9247	0	10.544	10.7036	0	11.6967	10.8066	10.8803	11.2577	10.6557	11.6446	10.5899	11.6765	0	0	0	10.0293	12.5601	12.0126	10.0396	12.2846	12.4584	12.3644	0	11.6139	11.5597	10.2645	11.7032	10.4598	10.2883	10.6891	10.666
AAMP	0	11.8454	11.2494	0	11.9974	11.3293	11.6184	0	11.4422	12.3691	0	11.8367	0	0	0	10.5374	0	9.60849	0	11.0358	10.9897	0	12.7287	11.8979	0	0	0	0	0	0	0	0	0	0	12.057	11.3692	0	12.4047	11.5351	11.862	0	11.3446	12.4147	0	11.6966	0	0	0	0
ABCC11	0	11.4556	10.905	0	11.9846	11.912	0	0	0	0	0	0	0	0	0	0	0	0	0	0	0	0	0	0	0	0	0	0	0	0	0	0	0	0	11.1319	11.5317	0	9.82494	11.041	0	0	0	0	0	0	0	0	0	0
ABCD3	0	6.19817	6.3612	0	8.99214	7.10884	0	0	0	0	0	0	0	0	0	0	0	0	0	0	0	0	0	0	0	0	0	12.6629	7.88148	10.673	0	0	0	0	7.36422	6.69734	0	9.52042	6.26946	0	0	0	0	0	0	0	0	0	0
ABCF2	0	10.7865	11.0532	0	11.2429	10.9668	0	0	0	9.16714	0	8.05729	0	0	0	0	0	0	0	0	0	8.10999	7.46577	9.45267	0	0	0	10.157	0	7.60318	0	0	0	0	8.45617	10.4653	5.58141	6.82393	8.267	9.53508	0	9.75237	10.0883	0	9.76107	0	0	0	0
ACAT2	0	10.3183	8.25276	10.3833	11.5637	11.1866	12.793	0	10.9745	13.3058	0	11.9063	0	10.1139	8.28891	7.96402	10.1463	9.06358	0	13.2024	12.7931	0	14.5052	14.0169	0	8.49941	9.55672	9.50139	8.40459	9.94593	0	0	0	0	11.8248	10.7462	0	13.4399	12.5169	13.1824	8.11022	11.8582	13.7516	0	13.1274	10.7619	0	8.48643	0
ACBD3	0	11.7853	11.8201	0	11.2762	11.8111	0	0	0	0	0	0	0	10.4137	10.5543	0	0	0	0	10.3306	10.7602	0	10.2307	10.9161	0	0	0	11.1402	10.9816	11.3064	0	0	0	0	0	0	0	10.0667	10.6027	0	0	0	0	0	0	10.4785	10.7447	10.4194	0
ACOT9	0	11.0455	10.7534	9.37334	11.8462	10.3296	0	0	0	0	0	0	10.8415	10.1308	10.3588	0	0	0	0	0	0	0	0	0	10.9523	10.8502	9.7596	10.7521	11.4627	11.6726	0	0	0	0	11.8357	9.49523	0	0	0	0	0	0	0	0	0	0	0	0	0
ACSL1	0	12.3714	11.8103	10.7568	12.1523	12.2343	0	0	0	9.7097	0	10.307	0	0	0	0	0	0	0	0	0	0	0	0	11.3402	11.3004	9.46208	12.3568	10.169	10.4769	0	0	0	0	12.6602	12.8785	10.9298	11.138	12.2346	10.5661	0	9.55553	10.4816	0	9.88403	0	0	0	0
ACSL4	0	13.1181	12.1622	0	13.2591	13.1842	0	0	0	12.3094	0	12.9328	0	0	0	9.60225	9.47868	9.27048	0	13.1779	12.1284	0	13.6917	13.3043	11.4249	11.0995	10.048	11.7459	10.3453	11.1777	0	0	0	0	12.7646	13.9267	10.3154	13.244	13.2877	13.2256	0	12.2128	12.1715	0	11.6964	0	0	0	0
AGFG1	0	9.64304	8.27601	0	10.673	10.4031	0	0	0	0	0	0	0	0	0	0	0	0	0	0	0	0	10.7296	8.99352	0	0	0	10.3697	9.40435	9.92131	0	0	0	0	0	0	0	0	0	0	0	0	0	0	0	0	0	0	0
AGL	0	10.0088	9.74856	0	10.1245	10.0378	0	0	0	0	0	0	0	0	0	0	0	0	0	11.5131	10.2654	0	11.9883	11.1849	0	0	0	8.923	8.82263	9.10863	0	0	0	0	11.1165	10.3431	0	9.00069	10.2902	10.2048	0	8.3427	10.2859	0	8.75791	0	0	0	0
AGPAT1	0	12.3895	12.8779	0	11.3593	11.7609	0	0	0	0	0	0	0	0	0	0	0	0	0	0	0	0	0	0	0	0	0	0	0	0	0	0	0	0	11.2996	12.4568	0	0	0	0	0	0	0	0	0	0	0	0	0
AHSA1	0	6.92884	7.74883	0	9.1827	9.06872	13.1014	0	10.9559	11.8671	0	12.2511	0	0	0	0	10.8677	10.1896	0	12.9012	12.6808	0	13.3482	14.0977	10.3046	10.6894	11.0836	9.88232	10.1267	10.3344	0	0	0	0	11.146	9.72329	0	11.0101	10.5083	13.2154	0	12.5374	13.8469	0	13.1988	0	0	0	0
AIMP2	0	12.2353	12.1846	9.83618	11.5077	11.2985	12.0397	0	11.6478	13.162	0	11.6083	0	0	0	0	12.4509	10.3545	9.88551	12.0831	11.7216	0	11.7524	12.3536	11.9901	11.7861	11.4837	11.6991	10.6037	11.6159	0	0	0	0	11.6905	11.755	10.7424	12.9225	11.8814	11.8659	0	12.0836	12.4439	0	12.4854	0	0	0	0
AK2	0	10.7036	9.80577	0	8.97588	9.60604	0	0	0	0	0	0	0	0	0	0	0	0	0	9.78363	11.736	0	14.0539	13.5457	0	0	0	0	0	0	0	0	0	0	0	0	0	12.3189	11.5206	0	0	0	10.2654	0	11.9408	0	0	0	0
ALG1	0	12.7734	11.4475	0	12.3032	11.7167	0	0	0	0	0	0	0	0	0	0	0	0	0	0	0	0	0	0	0	0	0	11.5978	0	10.2049	0	0	0	0	11.4192	11.5417	0	0	0	0	0	0	9.8283	0	8.87961	0	0	0	0
ALG5	0	12.0037	11.6719	0	11.1563	11.5846	0	0	0	0	0	0	0	0	0	10.2086	0	8.76504	0	0	0	0	0	0	0	0	0	10.3042	0	9.09496	0	0	0	0	11.7329	11.6822	0	11.7654	11.5362	0	0	0	0	0	0	0	0	0	0
ALOXE3	0	12.024	12.3448	0	0	0	0	0	0	0	0	0	0	0	0	0	0	0	0	0	0	0	0	0	0	0	0	11.2346	0	9.90905	0	0	0	0	0	0	0	0	0	0	0	0	0	0	0	0	0	0	0
ANKRD17	0	13.9607	12.8704	0	12.8961	11.3638	0	0	0	10.0784	0	12.525	0	0	0	0	0	0	0	0	0	0	0	0	0	0	0	0	0	0	0	0	0	0	13.6529	12.7088	0	11.8096	11.5526	0	0	0	0	0	0	0	0	0	0
ANP32E	0	12.8501	12.0574	0	12.7402	12.4047	0	0	0	10.4567	0	11.4135	0	0	0	0	0	0	0	0	0	0	12.1606	11.4784	12.7623	11.3336	0	12.3456	8.21529	11.5821	0	0	0	0	12.3569	12.2758	9.36934	12.5385	12.3598	11.6998	0	10.4511	11.7509	0	11.1224	0	0	0	0
ANXA11	0	14.6912	13.7343	11.8965	13.5289	13.3052	14.3814	11.4375	12.6249	15.0828	0	15.0959	0	10.5681	7.76069	7.92196	9.8755	8.79087	0	13.85	13.5034	0	14.7599	14.2821	8.49197	8.90156	9.50431	11.22	8.46322	9.77448	0	0	0	0	15.7273	15.6211	0	13.1472	13.5587	14.8739	11.1703	14.1333	15.7113	10.7418	14.9686	10.7676	5.44549	8.9659	0
ANXA4	0	12.881	13.044	0	0	0	12.0946	0	12.4805	12.1493	0	11.3808	0	0	0	0	0	0	0	12.8986	13.2494	0	13.3099	13.8512	0	0	0	0	0	0	0	0	0	0	13.6842	14.1987	0	12.4417	11.4346	11.401	0	12.4188	13.21	11.1123	12.5977	0	0	0	0
ANXA7	0	11.1415	10.3348	11.6402	11.8724	11.9701	13.2495	0	12.2243	13.3733	0	13.0752	0	10.0259	10.6842	10.4165	11.3819	10.5149	9.77975	13.064	12.9389	0	13.6511	13.4594	8.16667	11.5302	9.75174	11.7447	0	10.4074	0	0	0	0	12.5499	11.9582	0	12.6547	12.4861	13.0832	9.86256	12.5316	13.4856	0	13.249	11.3207	9.96555	10.0445	0
AP1M1	0	10.1196	9.47404	0	10.3308	9.28063	0	0	0	10.3268	0	10.2747	0	11.2212	10.868	10.109	0	9.59996	0	11.7633	10.7436	0	12.1166	11.5592	9.76522	10.1079	9.26318	10.198	11.5744	11.2826	0	0	0	0	10.4257	9.86641	0	9.68407	10.8491	10.544	0	11.1282	11.5957	10.6522	11.1341	10.3538	10.589	10.6328	10.1602
AP1S1	0	9.72527	9.50508	0	10.1304	9.81809	0	0	0	0	0	0	0	0	0	0	0	0	0	0	0	0	10.8705	10.3982	0	0	0	0	0	0	0	0	0	0	8.94924	10.3752	0	0	0	0	0	0	0	0	0	0	0	0	0
APOE	0	13.845	13.9233	10.0213	12.8172	13.3714	12.3359	0	10.7006	11.3606	0	11.4076	0	0	0	0	0	0	10.6611	10.9762	10.6336	11.2705	12.2943	12.4612	13.0014	11.6872	0	13.0307	0	11.5198	0	0	0	0	13.1146	14.1841	0	12.7697	12.6884	12.3342	0	11.7844	12.6524	0	12.3228	0	0	0	0
ARF3	0	10.2796	10.0468	11.6068	11.9327	10.3596	12.8788	0	11.7736	0	0	0	0	11.6902	11.1293	9.89009	12.8048	11.6436	0	14.3546	13.3307	0	13.9123	14.1727	9.83651	9.48072	11.7443	13.477	9.97443	12.4178	0	0	0	0	10.5553	10.3781	0	12.9103	13.0445	11.4279	11.7086	12.6832	12.8209	0	12.7957	11.7901	10.253	10.4625	11.7521
ARF6	0	12.3144	11.3293	10.7724	12.967	12.2072	0	0	0	13.935	10.0426	12.9548	10.8045	11.7414	11.1054	10.9578	11.4297	11.2714	0	13.3505	12.8078	0	13.2306	12.3715	12.3073	12.2416	12.304	12.6181	12.0708	12.3806	0	0	0	0	13.0467	11.9016	0	13.9161	13.4055	13.1653	0	12.4412	12.2577	0	12.2692	11.8072	10.3807	10.3071	11.7038
ARFGAP3	0	10.0951	11.1886	11.142	11.7999	11.3531	11.4745	11.3024	11.4689	11.2594	0	10.1714	0	11.034	11.0272	0	0	0	0	11.334	10.4579	0	11.2018	11.5421	0	0	0	12.4712	10.7082	11.8479	0	0	0	0	11.2944	11.1132	0	12.0162	10.9858	10.861	0	10.6399	10.1209	0	11.3605	0	0	0	0
ARHGAP42	0	9.88477	9.79655	0	0	0	0	0	0	0	0	0	0	10.2661	9.41393	0	0	0	0	0	0	0	0	0	0	0	0	0	0	0	0	0	0	0	0	0	0	0	0	0	0	0	0	0	0	0	0	0	0
ARHGDIA	0	10.6884	10.3966	8.08305	10.8066	10.4089	12.7453	0	10.4477	9.70224	0	12.5362	0	0	0	0	11.6136	9.2907	0	13.6301	13.1008	0	14.7409	14.1276	8.90728	9.54295	10.5352	11.9751	7.67913	11.0307	0	0	0	0	11.0448	10.1082	0	11.9595	12.3543	12.3272	0	11.3508	13.6577	0	13.3425	0	0	0	0
ARHGEF6	0	11.7294	11.3972	0	11.5824	11.1655	0	0	0	0	0	0	0	0	0	0	0	0	0	0	0	0	0	0	0	0	0	0	0	0	0	0	0	0	11.7711	11.5504	0	11.7671	11.8269	0	0	0	0	0	0	0	0	0	0
ARL1	0	10.3909	10.8043	0	0	0	12.0476	0	9.94352	0	0	0	0	0	0	0	0	0	0	10.5803	10.599	0	12.2872	12.684	0	0	0	11.261	0	9.75527	0	0	0	0	0	0	0	0	0	0	0	0	11.9013	0	11.862	0	0	0	0
ARL6IP4	0	9.92006	10.2553	0	0	0	0	0	0	0	0	0	0	0	0	0	0	0	0	0	0	0	0	0	0	0	0	0	0	0	0	0	0	0	9.64239	10.6638	0	0	0	0	0	0	0	0	0	0	0	0	0
ARMC6	0	11.6175	11.2853	10.9803	11.436	11.2747	11.3619	11.3282	11.5432	10.9264	11.3814	11.2389	11.8593	11.8427	12.0156	11.9799	12.0246	11.9976	0	0	0	0	11.2386	11.403	11.4385	11.7442	11.8113	10.8281	11.8798	11.6594	0	0	0	0	0	0	11.4473	11.155	11.0549	0	0	0	11.668	11.4294	0	11.3349	11.3042	11.8553	11.462
ARPC5L	0	12.3333	11.5132	0	12.6113	12.2505	0	0	0	12.9167	0	11.541	12.2847	13.8128	13.4898	12.8869	14.9548	14.0998	0	13.6678	13.2528	0	11.9096	12.4849	9.33105	13.5412	14.4035	10.1511	14.7423	13.5969	0	12.2035	11.3207	0	12.3839	11.3062	0	0	0	8.92113	10.7259	11.2594	10.4915	10.6552	13.1203	13.712	13.0146	13.3719	13.8386
ARRB1	0	11.9774	12.4344	0	12.1671	11.3358	0	0	0	0	0	0	0	9.80478	8.38733	9.11248	9.37988	8.22366	0	9.11805	9.05582	8.55094	10.1843	10.4598	9.75479	0	7.91874	10.3876	8.10504	9.87501	0	0	0	0	11.4824	10.594	8.33291	11.8276	10.7413	0	0	0	0	0	0	0	0	0	0
ASCC3	0	14.1846	14.8008	13.6543	14.6564	13.6212	14.3642	13.4375	13.4814	14.8634	13.0526	14.0261	13.9634	12.0951	12.7395	14.474	13.7497	13.5877	0	14.3988	12.9747	0	0	0	0	0	0	13.0036	14.1252	13.9444	0	0	0	0	0	0	14.1028	14.3613	14.3411	0	0	0	0	0	0	0	14.8495	13.1679	0
ASPH	0	10.4974	9.82691	0	0	0	0	0	0	0	0	0	0	0	0	0	0	0	0	0	0	0	0	0	0	0	0	11.1069	0	10.0874	0	0	0	0	0	0	0	0	0	0	0	0	0	0	0	0	0	0	0
ATP1B1	0	12.5615	11.6627	9.99195	12.857	12.0563	0	0	0	13.4798	0	13.0913	0	0	0	0	0	0	0	12.9739	12.8348	0	12.3235	12.5139	13.1694	10.9801	0	13.4807	0	12.1081	0	0	0	0	13.5901	12.8124	9.71428	13.7035	13.6786	12.9609	0	12.405	12.6408	0	11.7091	0	0	0	0
ATP1B3	0	12.9803	11.7383	10.1747	12.8958	13.1256	12.4768	0	11.4276	12.7075	0	12.5206	0	0	0	0	0	0	0	13.0297	12.5831	0	13.3423	12.9889	13.3448	11.8569	9.7987	13.5256	9.17308	12.4026	0	0	0	0	13.3857	13.6444	0	13.2812	13.6481	12.585	0	12.778	13.001	0	12.3091	0	0	0	0
ATP5MG	0	9.20101	8.99134	0	12.3497	11.6715	12.0871	12.6794	12.5874	13.3218	0	13.5684	0	9.37748	9.52682	0	0	0	0	10.4672	10.3358	0	10.7011	10.4265	0	0	0	15.376	10.0144	14.4276	0	0	0	0	13.4672	13.6324	8.23883	14.2632	13.7314	12.9911	0	12.1272	11.7562	0	12.125	0	0	0	0
ATP5PO	0	7.97676	7.94694	0	11.4171	11.1731	0	0	0	9.0219	0	11.348	0	0	0	0	0	0	0	0	0	0	0	0	0	0	0	16.7044	9.29315	15.6802	0	0	0	0	11.5766	11.2431	0	12.6101	13.5655	8.9348	0	7.55601	0	0	0	0	0	0	0
ATXN10	0	13.4011	12.7776	0	13.2096	12.3937	0	0	0	10.8492	0	10.1758	0	0	0	7.47102	12.2516	10.5793	0	10.9804	9.90658	0	12.5125	11.7667	0	9.91255	10.1672	8.92573	9.32546	9.60543	0	0	0	0	12.8409	11.7813	0	12.6329	11.5004	11.2891	0	10.6948	11.9145	0	10.9938	10.0152	0	9.41787	0
AURKA	0	10.8553	11.5273	0	9.10113	11.5509	0	0	0	0	0	0	0	0	0	0	0	0	0	0	0	0	0	0	10.4909	9.77813	10.4573	9.30012	11.1878	10.408	0	0	0	0	10.0368	11.7403	0	9.84892	9.84142	0	0	0	0	0	0	0	0	0	0
BAIAP2	0	11.0608	13.1622	0	10.0589	10.9319	0	0	0	0	0	0	10.3606	10.8858	10.8169	0	0	0	0	0	0	0	10.5769	10.518	10.8503	0	10.5928	9.70485	10.8221	10.8983	0	0	0	0	10.4714	9.88361	11.1048	10.8626	11.0779	10.3399	8.87191	10.7923	0	0	0	0	0	0	0
BCAP29	0	10.8424	9.81486	0	10.9144	10.2894	0	0	0	0	0	0	0	0	0	0	0	0	0	0	0	0	0	0	0	0	0	0	0	0	0	0	0	0	11.156	10.5662	0	10.589	10.2905	0	0	0	0	0	0	0	0	0	0
BCAS2	0	12.205	11.7794	11.2506	11.5385	10.5392	0	0	0	0	0	0	11.2234	11.1157	11.922	10.6278	11.1894	10.8043	0	0	0	0	8.81068	8.95977	12.1832	11.7763	11.5035	10.642	11.3313	11.2874	0	11.9115	10.4558	0	11.1373	9.83979	9.3226	12.1015	10.8343	0	0	0	0	0	0	8.98769	11.8745	11.0678	0
BET1	0	11.3087	9.72189	0	11.2612	10.1787	0	0	0	0	0	0	0	0	0	0	0	0	0	0	0	0	0	0	0	0	0	11.3112	0	9.2293	0	0	0	0	9.71016	10.693	0	0	0	0	0	0	0	0	0	0	0	0	0
BRAF	0	12.0071	10.3941	0	11.6147	11.4018	0	0	0	0	0	0	0	0	0	0	0	0	0	0	0	0	0	0	11.96	9.56078	0	11.6007	0	10.4156	0	0	0	0	11.8077	10.8833	0	10.5064	10.5908	0	0	0	0	0	0	0	0	0	0
BRIX1	0	9.62799	8.80177	0	10.2789	9.32744	0	0	0	0	0	0	0	0	0	0	0	0	0	0	0	0	0	0	0	0	0	10.853	0	9.97116	0	0	0	0	9.59347	9.11968	0	9.85727	9.36884	0	0	0	0	0	0	0	0	0	0
BSG	0	11.2087	11.4342	0	11.7132	10.3898	10.492	0	9.48031	11.8259	0	8.93235	0	0	0	0	0	0	0	12.4871	12.4719	9.60389	11.0334	11.9636	12.3787	10.97	8.62216	12.9153	0	12.0109	0	0	0	0	12.2817	12.4735	0	12.9163	12.2706	0	0	0	10.875	0	11.4827	0	0	0	0
BUD23	0	11.5479	11.9427	0	12.0057	12.0558	0	0	0	0	0	0	0	0	0	0	0	0	0	0	0	0	0	0	0	0	0	0	0	0	0	0	0	0	12.3639	12.0228	0	11.7174	10.8396	9.68136	0	10.1634	0	0	0	0	0	0	0
BYSL	0	12.3946	12.2848	0	11.8986	12.6431	0	0	0	0	0	0	11.1692	9.15329	8.89727	11.1208	8.26132	9.66934	0	0	0	0	0	0	11.0749	9.84138	9.86246	11.5427	10.0471	10.58	0	11.4941	11.2223	0	11.0297	11.6045	9.1934	10.0557	10.6702	10.5265	9.6347	8.74771	10.0058	0	9.43868	11.3045	11.4971	10.5578	10.9613
C11orf98	0	13.111	11.8387	0	13.1462	11.3561	11.7267	0	10.8661	12.5202	0	12.1608	12.4047	0	11.1391	11.9913	9.31933	11.2522	12.283	11.5726	11.4265	12.6402	10.7594	11.3907	13.2667	12.4557	10.9431	12.1765	11.2284	12.0844	0	12.8489	13.0461	0	12.9066	12.0239	12.3513	13.1177	12.4865	10.5571	0	11.9831	11.2128	0	11.0984	0	11.9536	11.0054	0
C1orf116	0	13.6932	13.0865	12.7787	14.9342	13.6792	15.9709	13.9565	15.5841	15.5736	13.1663	15.9451	0	13.859	13.8168	13.4415	13.696	13.7037	0	15.2408	15.0294	0	15.1673	14.8682	0	0	0	17.4138	13.4262	16.8028	0	0	0	0	13.9044	13.8814	0	14.4268	14.5049	16.0081	0	14.9491	16.0237	0	15.7652	0	0	0	0
C7orf50	0	8.51248	11.5723	0	0	0	0	0	0	0	0	0	0	0	0	0	0	0	0	0	0	0	0	0	0	0	0	9.53864	0	9.16479	0	0	0	0	0	0	0	0	0	0	0	0	0	0	0	0	0	0	0
CAB39	0	12.4929	11.3867	0	11.8849	11.154	11.9034	0	10.3861	12.5303	0	12.1566	0	0	0	0	0	0	0	11.4487	10.0407	0	11.8298	11.0261	0	0	0	11.1052	9.10291	10.7011	0	0	0	0	12.3168	11.5432	0	10.9246	11.1139	12.3025	0	10.4517	12.6202	0	11.9525	0	0	0	0
CAD	0	10.7774	9.37323	0	10.3774	10.283	12.8018	0	8.92352	10.9941	0	11.8467	0	0	0	0	0	0	0	13.0378	11.9643	0	13.7033	14.0244	0	0	0	12.4589	8.24163	11.3428	0	0	0	0	11.2979	12.4195	0	10.6119	11.0362	12.8049	0	11.4222	13.047	0	12.8696	0	0	0	8.75559
CALM3	0	13.1335	12.3753	0	13.3007	12.3709	12.5793	0	12.3208	12.6985	10.5933	12.2245	13.2482	12.2209	12.648	10.5061	13.0233	12.9178	0	14.2935	14.4974	0	15.6362	14.8536	15.8691	14.9645	13.2749	15.4964	11.6778	14.6529	0	13.9347	13.1408	0	13.5905	12.0218	0	15.047	14.4468	11.933	0	12.5674	13.6378	10.4841	12.9212	11.5112	12.8355	12.1596	12.1612
CAPN1	0	8.89922	9.08172	8.44444	8.47885	10.4447	12.7306	0	9.98873	11.6525	0	11.4509	0	10.8424	8.62227	8.56426	11.2807	10.1836	0	13.3531	11.8322	0	13.0951	13.7468	6.00625	9.23487	11.0741	10.205	10.3244	10.4201	0	0	0	0	10.342	12.01	0	11.4838	11.5311	13.3688	0	13.3656	13.9505	9.25842	13.7872	0	0	0	0
CBLL1	0	11.2615	11.7254	9.12443	10.6888	10.9084	0	0	0	0	0	0	0	0	0	0	0	0	0	0	0	0	0	0	0	10.7483	11.4706	0	11.0948	10.3963	0	0	0	0	10.565	10.9067	0	9.37341	10.071	0	0	0	0	0	0	0	0	0	0
CBX1	0	10.6241	8.83278	0	0	0	0	0	0	12.4548	0	10.7164	0	11.5039	10.83	0	0	0	0	12.7939	12.1477	0	14.2051	13.8496	10.0096	11.3849	11.7426	11.5486	11.4352	11.7934	0	0	0	0	10.3961	9.70086	0	12.8181	11.9141	0	0	0	11.6014	0	9.02052	12.1773	0	11.07	0
CCDC134	0	9.79158	9.02799	0	10.5934	9.7452	0	0	0	0	0	0	0	0	0	0	0	0	0	0	0	0	0	0	0	0	0	0	0	0	0	0	0	0	10.6565	8.94737	0	0	0	0	0	0	0	0	0	0	0	0	0
CCDC47	0	10.6644	9.34227	0	11.3064	9.42785	0	0	0	9.59743	0	10.6236	0	0	0	0	0	0	0	0	0	0	11.5794	11.4189	0	0	0	0	0	0	0	0	0	0	12.1261	10.7484	0	12.4951	11.9505	8.95571	0	12.9354	12.6425	0	12.2872	0	0	0	0
CCDC6	0	9.9786	10.7942	10.0814	10.6984	10.2773	12.5236	0	10.9211	12.3649	9.59188	12.3837	0	0	0	0	0	0	0	12.5699	12.0639	0	11.9732	11.9133	0	0	0	0	0	0	0	0	0	0	11.469	11.1833	9.46056	11.5982	11.3108	12.3612	0	9.49823	11.383	0	12.6654	0	0	0	0
CD9	0	11.2882	10.271	0	0	0	0	0	0	9.7101	0	9.53523	0	0	0	0	0	0	0	0	0	0	10.823	11.2827	0	0	0	12.2256	0	11.4856	0	0	0	0	12.8977	12.3037	0	12.6011	12.6573	0	0	0	11.0851	0	11.2134	0	0	0	0
CDC123	0	11.368	11.2161	0	11.173	11.5236	0	0	0	0	0	0	0	11.5329	11.3402	11.4253	11.512	11.5461	0	0	0	0	10.9221	10.4341	0	9.84858	10.6096	8.70877	10.7578	10.5276	0	0	0	0	10.8556	11.1791	0	0	0	0	0	0	0	0	0	10.4952	10.3399	10.5623	0
CDH17	0	10.4276	9.729	0	10.5336	10.091	0	0	0	0	0	0	0	0	0	0	0	0	0	0	0	0	0	0	0	0	0	0	0	0	0	0	0	0	10.8961	10.2888	0	11.7457	10.7639	0	0	0	0	0	0	0	0	0	0
CDK11B	0	11.9409	11.6352	0	11.7385	11.2297	0	0	0	10.7672	0	10.1536	0	10.2333	10.2723	9.8705	8.64184	9.35262	0	9.78542	9.53811	0	10.3994	9.86477	11.6401	10.7684	9.82429	10.053	10.5119	10.5004	0	0	0	0	11.9484	10.9431	11.5848	11.9899	11.1254	10.5276	9.97039	10.0099	10.6962	9.75474	9.66642	0	0	0	0
CDK5RAP1	0	14.9423	14.858	0	13.5	14.2912	14.7134	0	11.1603	13.0852	0	11.665	0	13.569	13.7516	0	0	0	0	14.0943	11.2164	0	14.1151	13.7659	0	0	0	11.1761	14.0961	12.9554	0	0	0	0	0	0	0	13.8852	13.9567	0	0	0	13.2223	0	13.8315	0	0	0	0
CDK7	0	12.2242	11.1113	0	11.4702	11.2445	0	0	0	0	0	0	0	9.84496	9.841	0	0	0	0	0	0	0	10.6096	10.5877	0	0	0	11.5049	11.0058	10.3789	0	0	0	0	11.7785	11.5274	11.679	8.85755	11.8795	0	0	0	0	0	0	0	0	0	0
CELF1	0	9.64726	9.45292	0	9.60973	9.54179	0	0	0	0	0	0	0	0	0	0	0	0	0	0	0	0	0	0	0	0	0	0	0	0	0	0	0	0	9.11881	9.62752	0	10.311	9.61953	0	0	0	0	0	0	0	0	0	0
CERS2	0	12.9919	12.4879	0	13.0992	12.5467	0	0	0	11.5358	0	9.94361	0	0	0	0	0	0	0	0	0	0	0	0	14.1142	12.284	8.51948	13.7632	0	12.747	0	0	0	0	13.1918	12.9312	9.35584	13.3615	12.6366	0	0	0	10.0892	0	8.81956	0	0	0	0
CETN2	0	11.2697	11.1067	0	10.9601	11.1225	0	0	0	0	0	0	0	0	0	0	0	0	0	0	0	0	0	0	0	0	0	0	0	0	0	0	0	0	11.3874	10.9722	0	0	0	0	0	0	0	0	0	0	0	0	0
CGN	0	9.60655	9.2007	0	0	0	11.497	0	10.2422	14.8161	0	14.3753	0	0	0	0	0	0	0	10.685	9.04211	0	11.5106	10.5288	0	0	0	0	0	0	0	0	0	0	7.81622	7.45014	0	9.21398	7.62582	11.7944	0	11.0399	13.1679	0	12.3061	0	0	0	0
CHEK1	0	11.5458	11.5251	10.1148	10.738	11.1159	0	0	0	0	0	0	0	0	0	0	0	0	0	0	0	0	0	0	0	0	0	0	0	0	0	0	0	0	11.416	11.1055	10.8288	10.4979	10.7124	0	0	0	0	0	0	0	0	0	0
CHMP4B	0	9.92759	10.1148	0	0	0	11.8863	0	10.7092	0	0	0	0	0	0	0	0	0	0	12.6953	12.2153	0	13.4892	13.593	0	0	0	10.352	0	9.32504	0	0	0	0	9.25424	11.5312	0	11.1382	11.56	11.6673	0	11.8889	12.8402	0	12.6947	0	0	0	0
CHP1	0	11.1069	9.6516	0	0	0	0	0	0	0	0	0	10.2215	8.32733	9.09368	0	0	0	0	0	0	0	0	0	12.6322	11.1169	9.1384	11.2338	9.24059	9.64006	0	0	0	0	0	0	0	9.62238	10.5379	0	0	0	0	0	0	0	0	0	0
CIAO1	0	11.7795	11.9209	0	12.2221	11.2847	0	0	0	12.8029	0	12.4013	0	0	0	0	0	0	0	11.1271	10.3856	0	11.2842	10.9561	11.7067	11.3894	12.3223	0	0	0	0	0	0	0	12.4875	11.9666	0	12.3536	11.8583	11.5571	0	11.1625	11.745	0	9.95324	0	0	0	0
CKS1B	0	12.0179	12.0753	8.59783	11.5758	11.3436	10.6269	11.0955	10.6121	0	0	0	11.6762	11.5551	11.9996	0	11.61	11.1089	0	11.4744	11.2179	0	11.9417	11.4802	11.6714	11.9407	11.7808	12.5823	11.9394	12.3936	0	0	0	0	0	0	0	0	0	0	0	0	0	0	0	10.6596	12.1004	12.0185	0
CLINT1	0	7.30328	7.81519	0	8.92544	8.28438	0	0	0	13.5156	0	12.3773	0	0	0	0	0	0	0	11.1309	9.6711	0	11.4753	10.741	0	0	0	0	0	0	0	0	0	0	10.475	9.03404	0	12.0049	10.9561	11.0574	0	10.2406	11.2121	0	10.2501	0	0	0	0
CLTB	0	10.928	10.5491	0	0	0	0	0	0	11.2392	0	12.0173	0	0	0	0	0	0	0	10.7447	11.5088	0	10.266	10.5373	0	0	0	0	0	0	0	0	0	0	0	0	0	11.0126	10.8013	0	0	0	0	0	0	0	0	0	0
CLTCL1	0	10.3153	10.2794	0	0	0	10.78	0	11.1412	0	0	0	0	0	0	0	0	0	0	0	0	0	0	0	0	0	0	0	0	0	0	0	0	0	8.45572	9.20477	0	10.1991	10.724	0	0	0	0	0	0	0	0	0	0
CMBL	0	9.90345	8.96281	9.92261	11.2226	9.4587	0	0	0	10.0994	9.01419	9.25336	10.2371	9.98763	10.4738	10.0232	9.45358	9.97413	0	0	0	0	8.71721	8.93537	10.1246	10.4858	9.90366	7.00439	9.96063	9.75419	0	0	0	0	0	0	0	11.6337	9.61825	0	0	0	0	0	0	10.065	9.63367	10.0418	10.0659
CMC1	0	12.084	12.3506	0	0	0	0	0	0	0	0	0	12.0317	11.7476	12.2609	10.342	12.6355	11.6877	0	0	0	11.4805	11.2994	11.1212	12.2987	12.1583	12.3257	12.6849	12.0046	12.2804	0	0	0	0	9.8663	10.9177	0	0	0	0	0	0	0	0	0	11.2885	11.8569	12.0231	11.1433
CMPK1	0	9.72129	9.1338	10.1857	10.0843	9.68475	11.3903	11.1321	10.5626	10.8003	0	11.2487	8.64598	10.7179	9.76824	10.6328	11.3817	10.4574	0	12.0756	11.186	0	13.1806	12.5941	0	0	0	0	0	0	0	0	0	0	10.0106	9.00312	0	11.9335	11.9972	0	0	0	12.4732	0	11.7448	0	10.8034	9.67497	0
CMYA5	0	12.5666	12.9512	0	12.8248	12.8385	0	0	0	0	0	0	0	0	0	0	0	0	0	0	0	0	0	0	0	0	0	0	0	0	0	0	0	0	0	0	0	0	0	0	0	0	0	0	0	0	0	0	0
CNOT9	0	10.4423	9.71057	0	11.9057	11.0276	0	0	0	12.4122	0	10.311	0	0	0	8.87058	8.96818	8.93578	0	0	0	0	11.2978	9.65412	0	0	0	0	10.2292	8.97205	0	0	0	0	12.3976	10.7547	0	12.4714	11.9634	0	0	0	0	0	0	0	0	0	0
COX5A	0	11.4148	8.19804	0	12.6324	11.8283	0	0	0	13.15	0	12.6079	0	0	0	0	0	0	0	0	0	0	12.1274	11.1029	0	0	0	15.8574	0	14.7197	0	0	0	0	13.0769	12.4188	0	15.4893	14.96	0	0	0	0	0	0	0	0	0	0
CPNE1	0	9.6903	7.83384	12.3015	10.6299	11.0318	13.1731	0	11.4828	11.9693	0	11.5932	0	0	0	7.5572	10.7161	11.6807	0	12.8479	13.3435	0	13.0454	14.0936	0	0	0	9.8177	5.81954	8.79141	0	0	0	0	11.6558	10.9933	0	12.3192	11.5881	11.7495	11.6798	12.357	12.9283	0	12.6099	0	0	0	0
CPSF1	0	12.5528	12.1498	0	9.21633	9.83301	0	0	0	0	0	0	0	0	0	0	0	0	0	0	0	0	0	0	10.7001	9.30232	9.25824	0	0	0	0	0	0	7.33333	9.22895	11.4793	10.6188	0	8.2601	0	0	0	0	0	0	0	0	0	0
CPSF2	0	12.2819	10.4193	0	10.0237	9.83405	0	0	0	0	0	0	0	0	0	0	0	0	0	0	0	0	0	0	0	0	0	0	0	0	0	0	0	0	10.0257	9.33191	0	0	0	0	0	0	0	0	0	0	0	0	0
CSRP1	0	10.6987	10.7544	0	9.63023	11.5332	14.7995	11.8502	14.2152	16.2157	10.0118	15.499	10.2953	13.1878	12.3829	0	13.873	12.3308	0	16.1167	15.7665	0	15.117	15.2289	0	12.8182	13.8271	12.3736	13.8527	13.5962	11.2344	11.3144	11.0829	0	10.2527	11.7449	0	13.2701	13.1277	14.7471	0	14.5775	15.1077	12.7697	15.254	13.4617	11.0014	12.1215	13.2673
CSTB	0	11.8407	11.9284	9.53928	11.6476	12.0556	10.4162	0	10.7945	0	0	0	9.56428	10.0287	9.89907	8.51262	11.4811	10.0999	0	12.4141	12.7243	0	12.2252	12.5097	10.0038	10.731	10.7722	12.7358	9.17025	11.7052	0	0	0	0	10.6298	11.3043	0	12.3484	12.0648	0	0	0	0	0	0	9.46756	10.1866	9.6704	0
CSTF1	0	11.6189	9.9287	0	10.1115	9.28543	0	0	0	0	0	0	0	0	0	0	0	0	0	0	0	0	0	0	0	0	0	0	8.92913	8.8687	0	0	0	0	11.2173	9.72995	0	10.3291	9.35682	0	0	0	0	0	0	0	0	0	0
CSTF2	0	10.6564	11.4151	0	0	0	0	0	0	0	0	0	12.1341	10.2398	10.3813	9.89064	12.0334	10.4393	0	0	0	0	0	0	13.1368	12.8942	12.6232	12.3338	12.0188	12.4658	0	0	0	0	0	0	0	0	0	0	0	0	0	0	0	9.55589	12.5141	11.6126	0
CTNNBL1	0	10.6929	9.80888	0	10.816	10.2085	0	0	0	10.7925	0	10.5097	0	0	0	0	0	0	0	0	0	0	11.3129	10.7426	0	0	0	10.4954	9.78061	9.96436	0	0	0	0	10.6164	10.569	0	10.9806	10.6509	10.876	0	9.82493	10.7534	0	9.92101	0	0	0	0
CTSD	0	8.48512	10.3584	11.7595	9.19497	10.4297	13.3504	0	11.3102	10.7956	0	12.1729	0	10.0227	9.5366	8.95359	11.0667	10.4804	0	13.0474	12.0894	0	14.6272	14.6367	9.25059	9.83716	10.8562	12.2967	9.39029	10.4779	0	0	0	0	9.47126	10.9008	0	10.7799	11.3373	13.0467	0	11.7019	13.7352	9.83761	13.5416	11.6837	0	10.178	10.0356
CTTN	0	9.91317	9.47383	0	0	0	0	0	0	15.8284	14.2588	15.9368	0	0	0	0	0	0	0	0	0	0	0	0	0	0	0	0	0	0	0	0	0	0	9.72162	10.4056	0	0	0	0	0	0	15.1636	13.9164	14.6525	0	0	0	0
CUL2	0	12.4215	12.9388	0	12.9831	13.4816	0	0	0	0	0	0	0	0	0	0	0	0	0	0	0	0	14.3481	13.8566	0	0	0	0	0	0	0	0	0	0	13.2907	13.3378	0	12.0133	12.8242	0	0	0	0	0	0	0	0	0	0
CUL4A	0	10.9621	10.5289	0	11.3288	10.6746	0	0	0	11.5831	0	10.8125	0	0	0	0	0	0	0	10.9492	9.15339	0	12.1296	11.3871	0	0	0	0	9.98491	9.43168	0	0	0	0	11.684	11.1576	0	12.4182	11.8714	0	0	0	0	0	0	0	0	0	0
CWC22	0	13.5535	12.0012	0	11.4036	11.269	0	0	0	0	0	0	0	0	0	0	0	0	0	0	0	0	0	0	0	0	0	0	0	0	0	0	0	0	13.3564	12.0092	0	10.6293	10.4535	0	0	0	0	0	0	0	0	0	0
CYFIP1	0	11.5249	10.1584	10.307	11.8072	10.7413	0	0	0	10.8422	11.6814	10.2671	9.31576	9.42109	9.42087	0	0	0	10.3679	10.9516	9.83242	10.8405	10.7086	11.1487	10.2974	10.2528	8.79542	9.65681	9.06961	9.63535	0	0	0	11.3782	12.4939	10.7015	12.3203	11.7461	11.8347	10.2947	0	10.4433	10.3421	0	10.1702	0	0	0	0
CYP2S1	0	12.485	12.4802	0	10.1665	11.4198	0	0	0	10.8186	0	10.9687	0	0	0	0	0	0	0	0	0	0	0	0	11.8681	10.6914	0	12.5607	0	10.661	0	0	0	0	11.9188	12.4059	9.57739	11.7874	11.41	0	0	0	0	0	0	0	0	0	0
CYSTM1	0	10.9968	10.1326	0	12.1439	11.0604	0	0	0	0	0	0	0	0	0	0	0	0	0	0	0	0	0	0	0	0	0	0	0	0	0	0	0	0	12.2466	11.0081	0	12.8459	12.3971	0	0	0	0	0	0	0	0	0	0
DBNL	0	7.38815	7.96792	0	0	0	12.3897	8.21179	11.5911	14.1855	0	14.6523	0	9.72456	7.42044	0	10.3431	8.06768	0	13.824	13.5816	0	13.007	12.9767	0	0	0	6.61218	9.1509	8.16171	0	0	0	0	9.94173	10.1291	0	10.6364	10.3821	12.5816	0	11.928	14.804	0	13.8738	0	0	0	0
DCAF8	0	10.7225	10.9315	0	10.3171	10.5788	0	0	0	0	0	0	0	0	0	0	0	0	0	0	0	0	9.6326	9.1543	0	0	0	0	0	0	0	0	0	0	10.333	11.176	0	8.22125	10.0446	0	0	0	0	0	0	0	0	0	0
DCUN1D5	0	13.2309	12.7368	0	13.3076	12.9899	9.57338	0	9.38774	11.0974	0	10.4311	0	0	0	0	0	0	0	9.83834	9.2587	0	10.9751	10.5207	9.91605	10.7583	0	14.8065	8.46465	13.8626	0	0	0	0	13.0733	12.7525	11.8153	10.4956	12.0971	11.446	0	9.27639	0	0	0	9.72841	10.1819	9.4564	0
DDA1	0	12.3743	11.9278	0	11.0874	11.2597	0	0	0	10.6465	10.4604	11.3424	11.5139	10.609	9.31541	0	0	0	0	0	0	0	12.66	12.2038	0	11.9137	10.0438	0	10.3026	10.2231	0	0	0	0	12.6137	10.9499	0	11.5265	12.383	12.6366	0	11.3066	12.4887	0	11.7969	9.61342	10.4171	10.5169	0
DDX19B	0	10.054	8.40092	0	10.4815	9.36942	0	0	0	10.6143	0	9.5287	0	0	0	0	0	0	0	0	0	0	0	0	0	0	0	0	0	0	0	0	0	0	10.5857	9.54705	0	11.1023	10.2377	0	0	0	0	0	0	0	0	0	0
DDX27	0	10.5957	10.0002	7.21218	9.76174	10.9099	0	0	0	0	0	0	9.93914	0	9.09507	10.8058	8.60366	9.30353	0	0	0	0	0	0	11.9289	8.6269	9.31363	12.4078	8.77073	11.3379	10.8976	10.8647	10.2628	0	9.54215	8.99023	8.74935	7.69408	9.20485	0	0	0	0	0	0	8.20738	10.5287	8.69303	0
DDX41	0	13.7365	12.8732	0	12.8294	12.7433	0	0	0	0	0	0	10.2982	10.5758	10.2315	10.078	0	8.92379	0	0	0	0	9.39675	9.63616	0	0	0	0	0	0	0	0	0	10.1473	12.0423	12.4871	12.6328	11.3034	11.5787	10.3339	0	9.91511	9.91486	0	9.2453	0	0	0	0
DERL1	0	10.173	10.0402	0	0	0	0	0	0	0	0	0	0	0	0	0	0	0	0	0	0	0	0	0	0	0	0	10.6522	0	8.92704	0	0	0	0	0	0	0	0	0	0	0	0	0	0	0	0	0	0	0
DHRS7B	0	12.7086	12.6896	0	12.2923	12.5832	0	0	0	0	0	0	0	0	0	0	0	0	0	0	0	0	0	0	12.3643	11.2857	0	12.6103	0	11.6074	0	0	0	0	12.101	12.881	0	11.0308	11.7864	10.5386	0	9.55788	0	0	0	0	0	0	0
DHRSX	0	12.1015	12.2486	0	0	0	0	0	0	0	0	0	12.0596	0	10.4223	11.5648	0	10.9454	0	0	0	0	0	0	11.8198	11.0167	9.34713	10.5924	0	9.98796	0	12.0232	12.0643	0	0	0	0	0	0	0	0	0	0	0	0	0	0	0	0
DIS3	0	10.425	10.0878	0	9.74334	9.49335	0	0	0	11.9145	0	9.51831	0	0	0	0	0	0	0	0	0	0	10.296	9.95816	0	0	0	8.94981	0	8.88838	0	0	0	0	9.34088	10.1488	0	11.5264	10.3556	0	0	0	0	0	0	0	0	0	0
DLD	0	10.5238	9.11971	0	11.8116	11.3423	10.4037	0	7.69589	11.5484	0	12.0338	0	0	0	0	0	0	0	8.38126	7.69857	0	12.8926	12.1147	7.54493	7.98618	8.32924	13.6667	8.9269	12.5262	0	0	0	0	11.3034	11.0642	0	13.8036	13.7024	10.7385	0	8.78128	12.5375	0	10.7429	0	0	0	0
DNAJA3	0	14.2911	13.8387	0	13.6922	12.1545	0	0	0	0	0	0	0	0	0	0	0	0	0	0	0	0	0	0	0	0	0	14.5987	12.4155	14.2781	0	0	0	0	13.975	12.4003	0	14.0297	14.0581	0	0	0	0	0	0	0	0	0	0
DNAJB11	0	11.4516	10.5176	8.83029	10.4929	10.9015	0	0	0	11.6277	0	10.0839	0	0	0	0	0	0	0	0	0	0	9.98223	10.2199	11.6558	11.5542	12.0958	11.0584	12.0261	11.5937	0	0	0	0	11.6047	11.4768	11.1417	11.985	11.4237	0	0	0	0	0	0	0	0	0	0
DNAJB6	0	12.5455	11.4582	11.6801	12.0941	12.065	0	0	0	12.3499	0	12.428	0	0	0	11.8818	11.8208	11.9156	0	0	0	0	0	0	12.1328	12.2516	12.3641	11.8251	11.763	11.9494	0	0	0	0	12.9401	12.3645	12.7862	12.6829	12.4784	0	0	0	11.5465	0	11.6228	0	0	0	0
DNAJC13	0	10.9179	10.9751	0	12.3304	11.3425	0	0	0	0	0	0	10.1442	9.47845	9.88497	11.5498	9.77873	10.1747	0	0	0	0	0	0	10.2465	9.82272	9.56795	8.98785	10.0016	9.48064	0	0	0	0	12.3786	11.4879	0	12.632	12.1316	0	0	0	0	0	0	10.1523	12.3308	11.4684	9.78163
DNAJC9	0	10.5755	11.1721	0	11.5514	10.41	0	0	0	0	0	0	9.8079	9.73095	9.84941	10.6497	10.0122	10.6309	0	10.3464	10.3338	0	11.5281	10.9987	10.457	10.4088	10.4928	10.7317	9.90058	10.7372	0	0	0	0	11.0263	10.2546	0	9.7622	10.9142	0	0	0	11.0414	0	10.6846	9.35517	11.0419	10.0049	0
DPAGT1	0	12.5509	12.1456	0	12.5728	12.6775	0	0	0	0	0	0	0	0	0	0	0	0	0	0	0	0	0	0	0	0	0	0	0	0	0	0	0	0	12.7008	12.1	0	11.7786	11.9978	0	0	0	0	0	0	0	0	0	0
DPP7	0	10.9992	11.4781	10.9902	11.7538	11.9876	11.587	0	10.8412	0	0	0	0	12.6909	12.2024	11.091	13.4964	12.3401	0	12.5879	12.0179	0	13.3317	12.6245	10.1294	11.7762	12.6394	7.96255	12.1044	11.6744	0	0	0	0	9.94383	10.8172	0	10.7693	9.77316	9.79746	12.1418	11.2499	9.57663	10.1372	10.9216	12.2358	9.63543	11.0603	12.0771
DTYMK	0	10.2762	9.9321	0	9.28971	9.82001	10.6909	0	10.0025	11.2475	0	9.97857	0	0	0	0	0	0	0	0	0	0	11.2994	11.5146	0	0	0	0	0	0	0	0	0	0	10.1986	9.93768	0	11.031	10.5267	10.4789	0	10.9487	11.6298	0	10.9663	0	0	0	0
DYNC1LI2	0	10.5799	9.93656	10.2921	11.0927	10.9211	11.5494	0	10.5269	11.1366	0	11.9713	0	11.7723	11.1255	9.75164	11.7642	10.7987	0	13.7404	13.1075	0	13.9874	13.6589	9.54398	11.2491	11.9275	11.1161	11.7263	11.2117	0	0	0	0	11.236	11.4014	0	10.1111	11.3053	12.1458	0	10.4864	12.1017	0	11.2894	10.9778	9.17757	10.0908	0
DYNLRB1	0	11.1519	11.1367	10.4244	11.3089	11.4813	0	0	0	0	0	0	12.2995	11.3541	12.1421	10.9128	12.765	11.9313	0	10.4557	9.96631	0	10.9842	11.7173	0	11.9392	12.3766	13.3112	11.4651	12.6287	12.0877	13.5384	13.5859	0	0	0	0	0	0	0	0	0	0	0	0	11.1059	12.542	12.3024	11.2842
DYNLT3	0	11.1086	10.8514	10.6984	11.7803	11.331	0	0	0	0	0	0	0	0	0	0	0	0	0	0	0	0	11.63	11.4539	0	0	0	0	0	0	0	0	0	0	0	0	0	0	0	0	0	0	0	0	0	0	0	0	0
EBP	0	13.625	13.96	9.85843	13.2577	13.7637	0	0	0	12.0836	0	11.058	0	0	0	0	0	0	0	0	0	13.3628	7.25096	11.8922	14.1979	13.1214	9.08945	13.7694	9.28764	13.0511	0	0	0	0	14.3252	14.3416	0	14.1568	13.7124	12.3249	0	12.2239	0	0	0	0	0	0	0
ECD	0	13.3246	12.0502	0	11.924	12.5095	0	0	0	11.3514	0	11.4046	0	0	0	0	0	0	0	0	0	0	0	0	0	0	0	8.84936	10.0432	9.70753	0	0	0	0	12.0436	12.4466	10.9323	12.0176	11.0138	10.3172	0	9.66447	9.48278	0	9.39767	0	0	0	0
ECHS1	0	9.12249	8.12655	11.1509	11.0493	10.7085	13.4751	0	12.1694	12.7901	0	12.6952	0	10.7199	9.51628	9.88513	10.8532	10.1908	0	12.9382	12.135	0	13.8266	13.4677	0	9.22391	9.97684	10.762	9.39463	10.0911	0	0	0	0	11.5626	10.2632	0	12.8904	12.6052	13.2435	9.30772	12.6361	13.942	9.34341	13.5401	10.6345	0	8.42793	0
ECPAS	0	13.9832	12.8692	0	13.7601	12.7397	0	0	0	11.4609	0	9.1493	0	0	0	0	0	0	0	8.56815	7.74557	0	10.6027	9.79852	11.2025	10.1305	9.58388	10.4234	7.374	9.32036	0	0	0	0	14.1015	13.8756	8.77587	12.974	13.0329	10.3515	0	8.57935	9.85702	0	8.9737	0	0	0	0
EDC4	0	12.2082	11.1883	0	12.1283	11.8883	0	0	0	10.7494	0	9.88109	0	0	0	0	0	0	0	0	0	0	10.9349	10.3841	11.4328	9.47758	7.33199	12.4449	8.27382	10.7146	0	0	0	0	12.1825	11.6816	8.19229	12.5117	11.9746	0	0	0	0	0	0	0	0	0	0
EEF1A2	0	11.418	9.05691	0	11.7699	10.898	0	0	0	0	0	0	0	0	0	0	12.5492	10.1058	0	0	0	0	0	0	0	0	0	0	0	0	0	0	0	0	11.3541	9.22308	0	11.7974	11.109	0	0	0	0	0	0	0	0	0	0
EEF1E1	0	11.8329	12.8393	0	0	0	0	0	0	0	0	0	0	11.5498	10.8937	9.96268	12.631	11.5031	0	11.9873	10.799	0	11.5175	12.0058	11.3179	11.6489	11.9561	11.4785	11.5676	11.799	0	0	0	0	0	0	0	0	0	12.2654	0	11.6943	12.8366	0	12.4978	10.6322	9.9663	10.6011	10.7417
EIF1AD	0	12.8006	12.2215	0	12.1834	12.5027	0	0	0	12.7883	8.26721	12.456	10.6385	10.2162	9.8707	9.6212	9.41184	9.51384	0	0	0	0	10.6182	8.46342	0	0	0	0	0	0	0	11.454	9.78677	0	12.6422	12.1098	0	12.6897	11.3724	11.1285	0	10.2762	11.3744	10.6697	10.1217	0	0	0	0
EIF2B4	0	10.9824	10.6189	0	11.4672	10.7431	0	0	0	11.0287	0	10.6189	0	0	0	0	0	0	0	0	0	0	0	0	0	0	0	0	9.53165	9.59815	0	0	0	0	11.7447	10.9415	9.53561	11.4986	11.067	0	0	0	9.53725	0	9.19481	0	0	0	0
EIF4G3	0	10.7538	10.5103	0	0	0	0	0	0	0	0	0	0	0	0	0	0	0	0	0	0	0	0	0	0	0	0	0	0	0	0	0	0	0	10.5415	10.9348	0	0	0	0	0	0	0	0	0	0	0	0	0
ELOC	0	12.0414	11.4631	0	11.1948	11.1365	11.9574	0	10.92	8.81279	0	10.4029	0	10.9981	10.5875	9.80252	11.7037	10.4385	0	12.17	11.4774	0	13.2572	12.8526	11.2915	11.5248	11.3939	11.1835	11.1998	11.4656	0	0	0	0	11.4234	11.6799	10.1767	11.9489	12.0589	11.7479	0	11.4199	12.7162	0	12.1674	10.6456	7.76911	8.68612	0
ELOVL5	0	13.2482	12.528	0	13.3017	12.7957	0	0	0	0	0	0	0	0	0	0	0	0	0	0	0	0	0	0	0	0	0	12.5993	0	11.7277	0	0	0	0	13.3259	12.6399	9.45179	13.3333	12.7167	0	0	0	0	0	0	0	0	0	0
EMD	0	10.3381	9.89026	0	10.4313	10.099	0	0	0	0	0	0	0	0	0	0	0	0	0	0	0	0	0	0	0	0	0	10.5755	0	8.81195	0	0	0	0	10.4769	10.408	0	10.6406	10.2969	0	0	0	0	0	0	0	0	0	0
ENAH	0	11.9266	10.5081	0	11.84	10.6815	10.6156	0	9.54953	14.9342	0	14.822	0	0	0	0	0	0	0	11.2058	10.6883	0	11.1984	10.2315	0	0	0	8.69669	7.05257	9.31447	0	0	0	0	11.1706	9.19847	0	12.1642	11.4501	11.1027	0	10.3377	13.4217	0	12.5772	0	0	0	0
ENDOD1	0	9.98036	11.1446	0	7.60781	11.0652	0	0	0	0	0	0	0	5.42036	5.24738	0	0	0	0	5.21329	5.20326	5.8844	5.95825	8.83648	11.9803	10.2786	5.10896	11.9645	5.61054	10.5276	0	0	0	0	10.5051	10.6268	0	9.94506	7.21135	8.0471	0	7.63619	8.78234	0	8.81828	5.20574	0	5.07607	0
EPB41L1	0	11.5428	11.2497	0	11.4159	11.1731	0	0	0	10.9818	0	11.4765	10.6267	9.09409	8.51436	8.6471	7.83428	8.47628	0	11.9058	10.2076	0	12.5967	12.5242	9.84024	9.00015	8.10664	10.9185	8.04158	10.7502	0	0	0	0	11.8511	11.0329	0	12.7694	12.4614	11.0072	0	10.1592	11.342	0	11.1083	0	10.6388	10.1714	0
EPCAM	0	11.9776	11.0933	8.79341	13.0448	12.5089	12.026	0	10.4764	12.6903	0	12.9982	0	0	0	7.47946	9.86425	8.7277	0	12.7362	12.1597	0	12.8726	12.5272	11.3679	10.26	9.21416	13.1625	7.97456	11.6831	0	0	0	0	13.6179	12.8075	0	13.5333	13.6266	13.1136	0	12.1624	12.2629	0	11.8138	0	0	0	0
EPHA2	0	11.3611	11.1825	0	11.8078	11.0342	0	0	0	9.94345	0	10.1463	0	0	0	0	0	0	0	0	0	11.4309	0	8.90935	12.4802	10.458	0	13.026	0	11.3243	0	0	0	0	12.0924	11.582	9.96823	12.077	10.8699	10.7521	0	10.227	9.6648	0	9.76343	0	0	0	0
EPHX1	0	11.4933	10.6067	0	0	0	0	0	0	10.728	0	11.1986	10.3295	8.46469	8.99311	10.074	9.42223	9.93153	0	0	0	0	8.17288	9.67576	10.8757	11.0907	9.69781	12.0885	0	10.7738	0	0	0	0	12.1819	11.6771	0	12.7003	12.5377	10.6237	0	10.1275	11.1425	0	10.7717	0	0	0	0
EPPK1	0	10.5118	11.2279	0	12.1151	11.466	13.3205	0	12.1104	13.3164	0	13.5444	0	0	0	0	0	0	0	12.4452	11.5033	0	11.3466	10.5897	0	0	0	13.8204	8.15315	11.7851	0	0	0	0	12.6885	12.3113	0	13.853	13.7468	14.8706	0	13.9969	13.9797	0	13.0529	0	0	0	0
EPRS1	0	11.5568	11.1087	7.81028	11.369	11.1588	11.7583	0	9.56656	12.2888	0	11.3313	9.32114	8.70972	8.17128	9.68676	9.67462	9.88836	0	12.1274	11.3602	0	13.4378	13.1423	8.94827	9.08142	8.82364	8.5932	8.16362	8.07505	0	0	0	0	12.3059	11.253	8.0974	12.5219	11.8654	12.5807	0	11.4038	13.2314	0	12.1226	7.8857	8.21109	9.77807	7.74369
ERGIC1	0	11.3195	11.1015	0	11.673	10.4603	0	0	0	9.87566	0	9.29852	0	0	0	0	0	0	0	0	0	0	0	0	11.4284	10.0104	0	11.2147	0	8.89206	0	0	0	0	12.2931	11.7293	0	12.2321	11.0644	0	0	0	0	0	0	0	0	0	0
ESD	0	9.77851	9.41305	8.98073	9.25974	9.03792	13.1005	0	11.9337	11.6669	0	11.248	0	0	0	8.9571	8.2609	7.74376	0	12.5382	12.1761	0	14.2541	13.3463	0	0	0	10.4099	0	10.0913	0	0	0	0	9.31945	8.57209	0	10.9953	10.8951	12.6408	0	10.9825	12.783	0	12.9468	8.96733	0	11.8311	0
ETFA	0	10.6775	10.5803	12.3202	11.5839	11.7449	13.2952	9.53049	12.5444	12.9223	0	11.5784	0	11.0673	9.45757	7.97957	11.8263	9.68287	0	12.8619	12.5255	0	14.0148	13.6866	10.345	10.851	10.9824	12.6229	10.7786	11.819	0	0	0	0	11.2764	11.8814	0	10.7536	11.9835	12.5489	10.6268	12.6277	13.4351	0	13.3015	11.7383	7.53006	9.86515	11.2034
ETFB	0	10.957	10.8958	12.7696	11.6156	10.701	11.195	0	12.7501	9.93306	0	9.85361	9.76486	11.5037	11.059	12.0393	12.4751	12.4011	12.0328	10.5048	12.6368	11.2065	12.7617	11.7973	12.135	12.246	12.0085	12.1838	10.9251	12.0522	0	0	0	0	11.5611	10.5752	7.2867	11.6547	11.9993	11.6093	11.3915	10.9611	12.3402	0	11.3547	12.5376	11.2325	12.0209	11.9322
EXOC7	0	10.0008	9.69702	0	11.2651	10.8502	0	0	0	0	0	0	0	0	0	0	0	0	0	0	0	0	0	0	11.4744	10.9349	10.373	11.1765	9.76045	10.7913	0	0	0	0	11.3998	10.3488	0	11.942	11.6414	0	0	0	0	0	0	0	0	0	0
EXOSC8	0	11.1216	9.82257	0	9.71644	9.96031	0	0	0	0	0	0	0	0	0	0	0	0	0	0	0	0	9.81056	9.15008	0	0	0	0	0	0	0	0	0	0	9.82066	9.87097	0	0	0	0	0	0	0	0	0	0	0	0	0
FAM133B	0	9.93519	12.7322	0	11.1247	11.1067	12.2361	0	10.544	0	0	0	0	0	0	0	0	0	0	0	0	0	0	0	0	0	0	0	0	0	0	0	0	0	10.8395	10.7394	0	10.8826	9.29031	11.1643	0	12.4977	11.2445	0	12.4688	0	0	0	0
FAM50A	0	9.64693	10.8534	0	9.37343	10.7004	0	0	0	0	0	0	0	0	0	10.0541	11.2215	10.7072	0	10.4291	9.85788	0	11.6646	11.4517	0	0	0	0	10.7636	9.25418	0	0	0	0	9.049	10.9023	0	0	0	10.0938	10.3049	10.2138	9.89163	0	10.3447	10.7966	9.49721	9.84568	0
FANCD2	0	10.7861	9.69868	0	10.9273	9.91625	0	0	0	0	0	0	0	0	0	0	0	0	0	0	0	0	0	0	0	0	0	0	0	0	0	0	0	0	11.2016	10.2275	0	10.8529	10.1984	0	0	0	0	0	0	0	0	0	0
FBXO30	0	10.2125	9.59515	9.90278	9.24149	9.95266	0	0	0	8.89168	0	9.16729	0	12.6495	11.7031	0	11.9563	10.6886	0	0	0	0	10.8776	10.0193	0	11.3639	12.3269	0	12.8261	11.1412	0	0	0	0	9.30871	8.62974	9.0797	9.59109	8.90983	10.1425	10.6643	11.0668	0	0	0	0	0	0	0
FKBP8	0	10.3275	9.74279	0	10.2721	10.0374	0	0	0	0	0	0	0	0	0	0	0	0	0	0	0	0	0	0	0	0	0	10.1923	0	8.75607	0	0	0	0	11.5182	10.1667	0	11.5723	11.0039	0	0	0	0	0	0	0	0	0	0
FLNC	0	6.76626	10.3683	0	8.7495	9.23897	14.7952	0	13.4192	14.7757	0	15.4321	0	0	0	0	0	0	12.6836	14.2955	13.394	13.2206	12.5515	12.5991	0	0	0	11.4429	0	10.4471	0	0	0	0	10.7782	10.3067	0	10.6827	11.2436	14.2055	0	14.1057	14.8469	8.41547	14.9459	0	0	0	0
FNTA	0	11.9372	11.8116	0	13.2437	11.5755	0	0	0	0	0	0	0	0	0	0	0	0	0	0	0	0	0	0	0	0	0	0	0	0	0	0	0	0	11.4635	11.6279	0	11.9482	11.1109	0	0	0	0	0	0	0	0	0	0
G3BP2	0	13.381	12.2047	10.8076	12.6668	12.1037	0	0	0	10.772	0	11.2866	9.735	11.6255	11.1877	11.0893	8.68289	10.1258	0	10.2981	9.3857	9.32758	11.3436	10.74	10.5571	10.5889	10.4413	8.35566	12.2629	10.4135	0	0	0	0	13.3692	12.5555	10.23	13.2279	12.813	9.97348	0	10.9176	11.0379	0	9.33763	10.6713	9.17639	10.2013	6.86146
GALNT3	0	12.8473	12.6119	0	12.5941	12.4626	0	12.543	12.0909	0	0	0	0	0	0	0	0	0	0	0	0	0	0	0	12.239	0	12.2382	12.2023	12.1891	11.097	0	0	0	0	13.0148	12.5775	0	12.5037	12.5471	0	0	0	0	0	0	0	0	0	0
GANAB	0	12.2981	11.3057	8.78216	11.8617	12.022	12.6756	0	11.2735	11.87	0	11.472	0	10.9265	8.02217	8.97513	11.1115	10.113	0	13.5597	13.1761	0	14.8688	14.2658	10.6821	9.89848	10.3055	10.9166	8.71058	9.70557	0	0	0	0	12.6965	12.6097	0	12.4706	12.6424	12.4938	0	12.3723	14.2743	0	13.3569	0	0	0	7.58274
GAPDH	0	12.384	11.9069	0	0	0	0	0	0	0	0	0	0	0	0	0	0	0	0	10.9205	9.93564	0	12.7623	11.9114	0	0	0	0	0	0	0	0	0	0	0	0	0	0	0	0	0	0	11.2973	0	10.359	0	0	0	0
GART	0	9.92962	11.3256	0	9.06207	10.6421	12.6301	0	9.79841	9.37679	0	9.40623	8.8339	9.71786	8.4723	8.15851	8.665	9.10965	0	13.3989	12.0051	0	14.5647	14.4123	8.99213	8.63038	9.3085	7.79614	8.54566	8.09347	0	0	0	9.15874	9.9628	11.0136	6.77109	10.1715	10.4467	12.55	0	12.2281	13.7778	0	13.3844	8.64904	9.16763	9.11454	0
GBA	0	11.8206	11.8585	10.881	11.0518	11.4608	0	0	0	0	0	0	0	0	0	0	0	0	0	0	0	0	0	0	11.5049	10.9981	10.854	12.3219	10.6081	11.8375	0	0	0	0	10.9574	11.5934	0	0	0	0	0	0	0	0	0	0	0	0	0
GBF1	0	11.9212	10.5567	0	11.4216	10.5161	0	0	0	0	0	0	0	0	0	0	0	0	0	0	0	0	8.43688	9.84106	0	0	0	10.0215	0	8.71822	0	0	0	0	11.9537	10.8129	0	12.1402	11.3304	8.42513	0	10.3457	0	0	0	0	0	0	0
GET3	0	9.96319	10.5086	0	11.2486	11.2377	0	0	0	0	0	0	0	0	0	0	0	0	0	0	0	0	11.448	10.5745	0	0	0	11.5828	0	9.37737	0	0	0	0	12.5314	11.6626	0	11.918	12.2026	0	0	0	0	0	0	0	0	0	0
GFPT1	0	10.3818	9.23852	7.47094	9.55277	9.98618	12.8577	0	11.6933	11.2101	0	11.5645	0	0	0	9.43311	10.9893	10.0169	0	13.1024	12.3953	0	14.0582	14.3422	9.76286	9.83105	9.44936	8.22113	0	6.94468	0	0	0	0	9.07952	9.61442	8.85287	11.0351	10.461	12.9417	0	12.8754	13.6157	0	13.4153	8.6327	8.48663	7.62965	0
GHDC	0	10.9911	11.605	0	10.6653	10.2323	0	0	0	0	0	0	0	0	0	0	0	0	0	0	0	0	0	0	0	0	0	0	0	0	0	0	0	0	10.5482	11.0112	8.77043	10.6844	10.3692	0	0	0	0	0	0	0	0	0	0
GLB1	0	10.9507	10.385	10.6308	9.63069	10.1737	13.3326	0	11.3703	12.0757	0	12.2831	0	10.8905	8.79622	0	12.0676	10.0005	0	12.1135	11.8183	0	13.9326	13.7789	9.52064	10.662	11.1506	12.4195	10.1582	11.4615	0	0	0	0	10.628	10.224	9.44058	10.1869	11.7053	13.025	0	12.174	14.082	0	13.5764	10.5983	0	9.18471	0
GMPS	0	12.2236	11.5144	10.6928	12.568	12.1294	0	0	0	12.3457	0	10.7342	0	0	0	0	0	0	0	11.4234	9.20631	0	12.9728	12.6158	12.5909	11.9538	10.804	0	0	0	0	0	0	0	12.8517	12.2551	0	13.0026	12.6162	12.7472	0	12.4659	13.1461	0	12.5565	0	0	0	0
GNAS	0	11.4147	10.2519	0	13.7317	12.743	12.4243	9.41678	12.2874	13.6539	0	12.4587	0	11.5847	10.9813	10.4619	9.94521	10.1923	0	13.0977	13.5552	11.1882	13.4783	13.3805	12.8438	12.6463	11.0646	14.4016	9.43955	13.1135	0	0	0	0	13.7376	13.0156	10.3133	14.872	14.3122	12.8982	0	12.5385	12.3862	0	11.3792	0	0	0	0
GNPNAT1	0	12.2776	12.2819	11.194	11.0953	12.6002	12.0665	0	10.931	9.85669	10.3259	10.3554	0	12.145	10.7892	0	0	0	0	12.8219	12.0623	0	12.7267	12.9957	8.49609	10.625	11.8799	12.0551	12.7774	12.4624	0	0	0	0	10.8176	11.9187	12.2871	10.2652	11.7362	10.4663	10.3987	10.5152	11.6767	12.1102	11.7419	0	0	0	0
GOLPH3	0	10.972	11.3947	8.84031	11.0285	11.2296	0	0	0	0	0	0	0	0	0	0	0	0	0	0	0	0	11.3169	11.7401	11.9361	11.0892	10.0405	0	0	0	0	0	0	0	11.1281	12.2759	0	0	0	10.6782	0	11.7414	10.6579	0	12.4764	0	0	0	0
GRB7	0	10.6286	9.69927	0	9.69456	10.1276	0	0	0	0	0	0	0	0	0	0	0	0	0	0	0	0	0	0	0	0	0	0	0	0	0	0	0	0	9.68805	9.95053	0	9.20038	10.5811	0	0	0	0	0	0	0	0	0	0
GSPT1	0	11.1944	9.26276	10.522	11.2759	11.1257	11.1915	0	8.95638	11.1283	0	10.8101	7.61213	10.8775	9.35548	8.69598	10.4322	9.82247	0	13.5394	13.1471	0	14.1923	14.3483	0	8.31694	10.2619	5.13319	10.2339	9.67745	0	0	0	0	11.6087	10.9842	0	11.0023	10.9841	12.8316	7.07253	10.5718	13.2298	0	12.6576	10.3355	8.28218	10.6331	10.3001
GSTO1	0	10.5964	10.2641	10.0424	10.5688	11.2668	13.8021	0	12.9447	11.4353	0	11.8244	0	10.4705	8.74133	7.13745	11.2486	9.56441	0	13.7341	13.1461	0	14.4878	14.5798	0	0	0	11.7307	8.15959	11.4022	0	0	0	0	11.1633	11.5273	0	11.8582	12.3997	13.301	0	13.2286	14.0059	9.37408	13.962	0	0	0	0
GTF2B	0	11.8855	12.2559	9.96415	12.0927	12.1961	0	0	0	0	0	0	11.5157	11.9469	12.0714	11.9129	12.3467	12.1477	0	0	0	0	0	0	12.3905	11.5727	11.7762	10.2713	11.5042	11.2489	0	0	0	0	11.4041	12.9669	11.4635	10.7942	11.1243	0	0	0	0	0	0	10.8482	11.7858	11.53	0
GTF2F1	0	10.3883	8.90976	11.8493	11.1272	11.5446	0	0	0	9.32569	0	8.83676	10.7237	10.8395	10.5615	10.7334	10.4858	10.458	0	11.604	11.3259	11.6973	10.0694	9.78852	0	0	0	10.5893	10.587	10.0958	0	0	0	11.4389	11.7965	11.333	10.9824	10.1779	11.1786	0	0	0	0	0	0	0	0	0	0
GTF2I	0	11.2096	10.6968	11.6978	10.8638	11.2484	0	0	0	0	0	0	0	0	0	0	0	0	0	0	0	0	10.6575	9.75551	11.6736	9.61092	10.299	11.0647	7.4545	11.0297	0	0	0	11.2361	11.3593	10.5063	12.6147	10.6451	11.5264	0	0	0	0	0	0	0	0	0	0
GTPBP4	0	12.9056	12.2757	0	12.3566	12.2552	8.88275	0	6.88827	7.33963	9.52658	9.27117	0	0	0	0	0	0	10.5876	6.85825	8.22132	12.0294	9.0298	9.80823	12.4634	9.94533	0	12.7298	0	10.8864	0	0	0	9.16727	11.6432	11.197	0	10.153	11.0025	10.153	0	7.87876	10.3613	0	8.36229	0	0	0	0
HABP4	0	11.2527	9.88087	0	11.3769	10.2271	0	0	0	0	0	0	0	0	0	0	0	0	0	0	0	0	0	0	0	0	0	0	0	0	0	0	0	0	10.4565	9.24161	0	11.1669	10.3626	0	0	0	0	0	0	0	0	0	0
HACD2	0	12.7528	12.4459	0	12.7624	12.1497	0	0	0	0	0	0	0	0	0	0	0	0	0	0	0	0	0	0	0	0	0	0	0	0	0	0	0	0	12.9392	12.4674	0	12.5729	12.1285	0	0	0	0	0	0	0	0	0	0
HACL1	0	8.26369	9.4527	0	0	0	0	0	0	0	0	0	0	0	0	0	0	0	0	11.9193	9.94972	0	11.2893	11.6825	0	0	0	0	0	0	0	0	0	0	0	0	0	0	0	0	0	0	0	0	0	0	0	0	0
HARS1	0	12.0417	12.0992	0	12.4258	11.8007	12.4314	0	11.7004	10.42	0	10.405	9.34014	10.5688	10.6322	11.0197	10.6616	11.0871	0	12.5754	11.4939	0	12.8095	13.0574	11.6452	10.7776	9.87751	11.1009	10.4075	10.1538	0	0	0	0	12.4599	11.4799	11.0044	11.5344	11.8516	11.63	0	11.1853	12.4967	0	11.7082	11.1752	11.3219	10.1975	0
HBS1L	0	9.79458	9.55481	0	0	0	0	0	0	0	0	0	0	0	0	0	0	0	0	0	0	0	0	0	0	0	0	0	0	0	0	0	0	0	0	0	0	0	0	0	0	0	9.27816	0	8.48736	0	0	0	0
HCLS1	0	7.80649	8.23355	0	0	0	0	0	0	0	0	0	0	0	0	0	0	0	0	0	0	0	0	0	0	0	0	0	0	0	0	0	0	0	0	0	0	0	0	0	0	0	0	0	0	0	0	0	0
HDGF	0	10.9954	10.4921	9.43998	10.8345	11.6395	12.5879	11.4521	12.4746	11.2531	0	11.3316	0	9.37296	10.018	9.64057	12.5258	10.9096	0	13.5191	13.3633	0	14.3458	13.6677	0	9.92681	11.3998	15.7038	10.1256	14.5825	0	0	0	0	10.9553	11.8012	0	11.737	12.2469	11.3457	0	12.1883	13.3195	0	12.9586	9.40971	10.8928	10.492	10.0626
HEXB	0	10.0661	11.4794	0	11.294	10.5944	9.53169	0	8.36608	13.2068	0	12.5707	0	0	0	8.94284	10.7878	9.23903	0	11.6391	10.8484	0	13.2186	12.3219	9.90986	10.4119	11.0592	11.3471	9.94251	11.2725	0	0	0	0	11.376	9.58551	0	12.2006	11.9214	11.808	0	9.82967	12.5248	0	10.7167	0	0	0	11.2803
HIBCH	0	11.8034	11.1656	0	11.8345	11.3157	11.9991	0	10.1737	12.0815	0	11.9579	0	0	0	0	0	0	0	10.5766	9.82818	0	12.2228	11.4973	0	0	0	0	0	0	0	0	0	0	11.9287	11.6993	0	12.1272	11.5217	11.5297	0	10.6694	12.0313	10.4263	11.3862	0	0	0	0
HK2	0	10.8628	9.20478	0	11.0295	9.94232	0	0	0	0	0	0	0	0	0	0	0	0	0	0	0	0	9.42797	9.51418	0	0	0	0	0	0	0	0	0	0	12.0428	10.1896	0	13.0221	11.0904	9.5744	0	9.30643	11.7356	0	10.1713	0	0	0	0
HLA-A	0	9.76023	9.12094	0	11.3447	10.8294	0	0	0	9.81812	0	9.84605	0	0	0	0	0	0	0	11.2366	8.95623	0	11.489	10.9474	0	0	0	11.4878	0	9.92084	0	0	0	0	11.6944	11.5278	0	10.9024	11.9394	11.3558	0	9.99271	10.8147	0	9.79054	0	0	0	0
HM13	0	10.549	11.7865	0	10.8391	11.0074	0	0	0	0	0	0	0	0	0	0	0	0	9.28272	8.48957	8.86567	11.8134	0	8.83809	12.1738	11.2859	0	13.3448	8.80103	12.8486	0	0	0	0	12.3545	12.1679	0	11.5911	10.8402	6.52913	0	10.1506	8.46653	0	10.6432	0	0	0	0
HMCES	0	14.1938	15.2464	0	0	0	0	0	0	0	0	0	0	13.0606	12.8054	0	0	0	0	0	0	0	0	0	0	0	0	11.8461	13.359	13.3703	0	0	0	0	0	0	0	0	0	0	0	0	0	0	0	0	0	0	0
HNRNPH2	0	10.1436	9.9248	0	10.4132	10.0226	0	0	0	0	0	0	0	0	0	0	0	0	0	0	0	0	9.0178	9.83775	0	0	0	8.74325	9.41312	10.2297	0	0	0	0	10.2217	9.71028	0	10.0138	10.0856	0	0	0	0	0	0	0	0	0	0
HNRNPUL1	0	12.2615	11.9038	0	12.3417	11.6238	0	0	0	10.8633	0	10.7316	0	0	0	0	0	0	0	0	0	0	12.0081	11.1837	11.2599	10.8541	8.89151	11.2791	10.6728	11.1836	0	0	0	0	11.9456	10.7498	8.90053	12.6156	12.1844	10.1756	0	9.34243	0	0	0	9.04712	10.6019	9.38593	0
HP1BP3	0	11.0707	8.94339	0	9.82173	8.99685	0	0	0	0	0	0	0	0	0	0	0	0	0	0	0	0	0	0	0	0	0	0	0	0	0	0	0	0	10.825	9.18509	0	9.71291	9.42593	0	0	0	0	0	0	0	0	0	0
HSD17B2	0	10.6558	11.4381	0	11.4514	9.81626	0	0	0	0	0	0	0	0	0	0	0	0	0	0	0	0	0	0	0	0	0	0	0	0	0	0	0	0	11.7047	10.6479	0	11.7615	10.6148	0	0	0	0	0	0	0	0	0	0
IBA57	0	14.2374	12.6327	0	14.5703	13.4766	0	0	0	0	0	0	0	0	0	0	10.4838	11.1129	0	0	0	0	0	0	0	0	0	0	0	0	0	0	0	0	14.4337	14.2417	0	0	0	0	0	0	0	0	0	11.0099	12.5764	10.9991	0
ICAM1	0	10.0985	9.34858	0	0	0	0	0	0	0	0	0	0	0	0	0	0	0	0	0	0	0	0	0	0	0	0	0	0	0	0	0	0	0	0	0	0	0	0	0	0	0	0	0	0	0	0	0	0
IDH1	0	9.83257	9.10291	10.3048	11.2453	10.846	13.8192	0	12.5513	13.0824	0	12.3013	0	9.75435	8.20308	8.48474	11.49	9.63578	0	13.8339	13.0682	0	14.3318	14.2418	0	7.92496	8.83532	9.45636	5.88989	8.20526	0	0	0	0	11.6197	10.7793	0	13.3014	12.9192	13.3918	0	12.7403	14.0124	0	13.8095	10.6917	5.41258	9.71052	0
IDH3B	0	11.2467	11.4697	0	12.0876	10.7755	0	0	0	9.90603	0	11.2613	0	9.70245	9.79262	10.1987	8.43225	9.26948	0	9.61694	9.2918	0	10.413	9.82734	11.4002	10.8724	10.2082	11.5801	10.3968	11.1633	0	0	0	0	12.2205	12.0329	10.04	11.2394	11.9907	10.4785	0	11.1339	10.9863	0	11.4925	0	0	0	0
IGBP1	0	10.0137	8.94225	0	0	0	0	0	0	10.391	0	9.53976	0	0	0	0	11.6759	10.3382	0	0	0	0	11.2464	10.4396	10.2737	11.5457	10.0875	0	0	0	0	0	0	0	9.96287	8.55672	0	10.6237	9.90532	0	0	0	0	0	0	0	0	0	0
ILVBL	0	12.1014	10.8507	0	11.7609	11.1286	0	0	0	0	0	0	0	0	0	0	0	0	0	0	0	0	0	0	0	0	0	12.0284	0	10.8712	0	0	0	0	12.4125	11.8491	0	12.1396	11.7944	9.35917	0	9.0795	0	0	0	0	0	0	0
ISCU	0	11.4488	10.9182	0	10.8637	10.2077	0	0	0	0	0	0	0	11.4802	10.1007	0	0	0	0	0	0	0	0	0	0	0	0	0	0	0	0	0	0	0	0	0	0	0	0	0	0	0	0	0	0	0	0	0	0
IST1	0	11.218	10.0166	0	12.2231	11.2138	11.6889	0	10.6586	11.6665	0	11.0662	0	0	0	0	0	0	0	10.6526	10.1452	0	11.3626	11.164	0	0	0	12.1914	9.57674	10.9114	0	0	0	0	12.2945	11.1396	0	12.9041	12.2137	11.4112	0	10.9888	11.4114	0	10.9483	0	0	0	0
ITGA2	0	12.3142	12.8834	0	13.6537	13.528	0	0	0	0	0	0	0	0	0	0	0	0	0	0	0	0	0	0	0	0	0	11.8935	12.679	12.7716	0	0	0	0	0	0	0	0	0	0	0	0	0	0	0	0	0	0	0
JAGN1	0	10.2546	8.97874	0	10.5769	9.13312	0	0	0	0	0	0	0	0	0	0	0	0	0	0	0	0	0	0	0	0	0	10.2216	0	10.3523	0	0	0	0	11.1984	9.70644	0	11.629	10.2021	0	0	0	0	0	0	0	0	0	0
JAK1	0	11.3794	11.4377	11.325	11.2036	11.5052	10.2113	10.7563	11.9997	0	0	0	11.6654	11.5487	10.5852	10.6094	11.5457	11.47	0	0	0	0	10.8552	10.6865	0	11.3803	11.8365	11.4763	11.8383	11.4402	0	0	0	0	11.2441	11.3287	11.7746	10.5766	11.2298	0	11.8998	11.4424	9.82321	11.8396	11.6366	11.4139	11.5459	11.4659	11.3149
JPT2	0	7.42101	8.36058	0	10.1852	8.99093	0	0	0	11.2468	0	10.0103	0	0	0	0	0	0	0	0	0	0	7.39215	10.5876	0	0	0	13.041	9.50126	12.1312	0	0	0	0	0	0	0	0	0	0	0	0	0	0	0	0	0	0	0
KDELR1	0	11.7825	9.31719	0	10.5459	11.6	0	0	0	12.0903	0	6.21126	0	0	0	0	0	0	0	9.02002	8.35924	0	0	0	0	0	0	10.8892	0	9.83911	0	0	0	0	12.7166	11.632	10.6692	13.4953	11.398	0	0	0	0	0	0	0	0	0	0
KDM1A	0	10.7399	10.2744	0	12.6001	12.2688	0	0	0	10.2482	0	9.62842	10.8882	10.5865	9.55773	10.8839	10.2274	11.3628	0	0	0	0	0	0	0	10.9601	11.0981	10.591	12.4142	10.4309	0	0	0	0	12.6786	11.6363	11.4457	12.9171	12.6644	0	0	0	0	0	0	10.9916	9.11763	10.8249	8.78611
KIN	0	11.3418	10.8209	0	9.88284	10.2958	0	0	0	0	0	0	0	9.0482	9.31099	0	0	0	0	0	0	0	0	0	0	0	0	7.14537	9.54189	8.86101	0	0	0	0	11.0525	11.0539	0	0	0	0	0	0	0	0	0	0	0	0	0
KPNA1	0	13.4836	13.0124	0	13.1794	12.3576	0	0	0	9.98284	0	9.24918	0	0	0	0	0	0	0	0	0	8.28086	10.0211	8.68673	11.6172	9.18362	7.08162	11.44	8.12102	10.4593	0	0	0	0	12.5654	12.4227	9.68166	11.4914	11.0724	0	0	0	0	0	0	0	0	0	0
KPNA4	0	10.3984	10.1964	0	0	0	0	0	0	11.1474	0	10.285	0	0	0	0	0	0	0	0	0	0	9.35495	10.4135	9.54081	8.8864	9.65382	10.0839	9.20934	9.82157	0	0	0	0	11.4435	10.5224	0	11.636	10.6977	0	0	0	10.3953	0	10.3063	0	0	0	0
KPNA6	0	13.0726	12.8245	9.03318	13.0558	12.8093	10.3812	0	9.11147	10.1276	0	10.0951	0	9.2593	8.99715	8.02956	9.95115	8.59854	0	0	0	0	10.3485	10.4888	12.1468	11.0509	9.24417	12.0916	9.58889	11.3943	0	0	0	0	12.6342	12.4574	9.68422	11.7523	11.9516	11.2126	0	10.561	11.1933	0	10.8009	0	0	0	0
LARP4B	0	11.227	11.0348	0	11.7138	11.1438	0	0	0	9.69356	0	10.8356	0	0	0	9.1357	9.70449	0	0	0	0	0	0	0	10.2018	9.71492	9.89227	10.8172	10.8227	10.9819	0	0	0	0	11.0163	10.5665	8.67076	7.11176	10.6471	10.6565	0	10.4151	0	0	0	10.037	9.18786	9.05039	0
LASP1	0	9.9891	9.13493	6.74524	8.71248	8.34347	13.4904	0	13.0041	15.2216	0	14.3524	9.56851	10.4908	10.0178	2.99322	11.0827	9.98762	0	15.9106	15.6095	0	14.2758	15.0444	11.0033	10.5181	10.5967	14.1194	10.1426	11.9978	0	0	0	0	9.20775	8.79362	0	10.8418	10.2527	11.1784	0	12.7759	14.6253	10.6138	14.7313	8.69778	9.14363	8.0321	0
LCLAT1	0	8.06207	8.78699	0	8.32724	7.81919	0	0	0	0	0	0	0	0	0	0	0	0	0	0	0	0	0	0	0	0	0	11.8737	0	8.79923	0	0	0	0	7.7253	9.08304	0	7.50641	7.59824	0	0	0	8.13509	0	7.04425	0	0	0	0
LMF2	0	15.3533	13.9784	0	0	0	0	0	0	0	0	0	0	0	0	0	0	0	0	0	0	0	0	0	0	0	0	0	0	0	0	0	0	0	15.0605	14.7802	14.4712	15.6244	14.7358	0	0	0	0	0	0	0	0	0	0
LNPK	0	11.3788	11.0709	0	12.1615	11.3822	0	0	0	0	0	0	0	0	0	0	0	0	0	0	0	0	0	0	0	0	0	0	0	0	0	0	0	0	11.1969	11.5915	0	0	0	0	0	0	0	0	0	0	0	0	0
LPCAT2	0	11.0706	10.2059	0	10.3694	10.4574	0	0	0	0	0	0	0	0	0	0	0	0	0	0	0	0	0	0	0	0	0	0	0	0	0	0	0	0	11.8505	11.1611	0	0	0	0	0	0	0	0	0	0	0	0	0
LPCAT3	0	10.2171	10.8956	0	10.3898	9.75842	0	0	0	0	0	0	0	0	0	0	0	0	0	0	0	12.631	0	8.40348	0	0	0	12.7731	0	11.3255	0	0	0	0	11.5373	10.1786	9.26118	10.8589	10.3717	0	0	0	0	0	0	0	0	0	0
LRCH1	0	10.425	9.54232	0	0	0	12.7223	0	11.7302	13.4049	0	11.771	0	0	0	0	0	0	0	9.5522	10.2425	0	8.38573	10.4648	0	0	0	0	0	0	0	0	0	0	0	0	0	0	0	11.8396	0	10.667	0	0	0	0	0	0	0
LRRFIP1	0	10.3038	9.69151	0	9.3684	9.85115	0	0	0	0	0	0	9.47785	9.88046	9.77844	10.6352	10.3643	10.1452	0	0	0	0	12.0441	10.9636	0	0	0	0	0	0	0	0	0	0	0	0	0	9.83906	9.24372	0	0	0	0	0	0	0	0	0	9.69376
LSM1	0	12.5356	11.4352	0	10.621	11.0358	0	0	0	0	0	0	0	0	0	0	0	0	0	0	0	0	11.0846	9.97366	11.4507	11.204	10.7633	11.1758	11.087	10.7896	0	0	0	0	0	0	0	10.8186	11.2388	0	0	0	0	0	0	0	0	0	0
LSM5	0	9.92795	10.4567	0	11.2764	10.497	0	0	0	0	0	0	11.4815	10.2775	10.5962	7.34065	10.8659	9.07374	0	0	0	0	10.7857	10.8897	10.1869	9.96996	10.905	10.7587	11.1505	10.9418	0	11.9363	9.834	0	0	0	0	0	0	0	0	0	0	0	0	9.12472	11.6471	11.2214	9.12039
LTV1	0	10.7386	11.0123	0	11.3916	9.84594	0	0	0	0	0	0	0	0	0	11.1731	0	9.88257	0	0	0	10.1317	7.66924	8.31642	11.1555	9.07095	7.87387	10.602	8.6777	10.3144	0	0	0	0	9.28281	9.19892	0	9.74017	9.22259	9.26862	0	9.70254	8.98071	0	9.53492	0	0	0	0
LUC7L	0	13.2899	12.8378	0	12.9798	12.3304	0	0	0	0	0	0	11.8714	0	10.0088	0	0	0	0	0	0	0	11.3087	8.89881	11.5311	10.3616	9.37803	10.8311	9.84972	10.3726	0	0	0	0	12.9797	12.6464	11.367	13.272	13.2795	11.8314	0	11.3142	0	0	0	0	0	0	0
LUC7L3	0	11.1643	12.0633	0	0	0	0	0	0	0	0	0	12.3208	11.2654	11.8547	11.7596	10.5764	11.4291	0	0	0	0	11.2667	9.52645	12.2303	12.1386	11.6921	11.193	11.8319	11.4557	0	12.1189	11.7775	0	11.3061	10.0406	0	0	0	0	0	0	10.0441	11.0102	9.91843	11.3414	12.0204	11.7936	10.3288
LYAR	0	11.4335	10.547	0	11.269	10.7508	0	0	0	0	0	0	0	0	0	0	0	0	0	0	0	0	0	0	0	0	0	0	0	0	0	0	0	0	10.9819	9.79739	0	10.1789	9.6882	0	0	0	0	0	0	0	0	0	0
MAGED2	0	11.9997	11.6476	0	12.2753	10.2342	0	0	0	0	0	0	0	0	0	0	0	0	0	0	0	0	0	0	0	0	0	0	0	0	0	0	0	0	12.0872	11.3281	0	11.9638	11.7819	0	0	0	0	0	0	0	0	0	0
MAGT1	0	10.3006	9.70332	0	10.2962	9.96474	0	0	0	0	0	0	0	0	0	0	0	0	0	0	0	0	0	0	0	0	0	9.63072	0	8.20403	0	0	0	0	0	0	0	0	0	0	0	0	0	0	0	0	0	0	0
MAPK1	0	11.8781	9.7548	10.3203	12.2074	12.0622	12.1397	0	10.9126	12.7197	0	12.5697	10.6688	9.97915	9.16685	10.7006	10.4607	10.6901	0	12.4224	11.0361	0	13.412	12.8445	11.7865	10.9694	11.0917	10.2961	9.01542	9.56835	0	0	0	0	12.787	11.8873	10.6435	12.7738	12.5267	12.814	0	11.7793	13.1969	0	12.3582	10.691	10.6901	9.82757	0
MAPK13	0	11.4453	10.4279	0	11.8166	10.5863	0	0	0	0	0	0	0	0	0	0	0	0	0	0	0	0	0	0	0	0	0	0	0	0	0	0	0	0	11.8023	10.5271	0	10.9742	10.8602	0	0	0	0	0	0	0	0	0	0
MARCKS	0	10.8392	10.2157	10.1049	11.1767	9.88072	0	0	0	10.5466	0	12.106	0	0	0	0	9.49413	10.4853	0	10.1523	9.28936	0	12.3607	11.6831	11.4921	11.0707	10.356	12.6873	0	10.1564	0	0	0	0	11.0106	10.0501	10.3493	14.2139	13.6667	0	0	0	10.1466	0	8.9515	0	0	0	0
MAT2A	0	7.73505	9.66072	10.4462	9.29532	7.84361	11.5308	0	11.2025	11.9345	0	11.0337	0	0	0	8.43625	10.8826	9.06329	0	12.2326	12.3777	0	13.0943	12.3527	9.00222	9.26929	8.03949	8.65903	9.48006	8.86242	0	0	0	0	10.7331	8.72994	0	12.2201	10.7055	10.216	6.80594	9.89358	12.1323	10.0023	12.5179	9.95603	8.14032	9.77824	0
MBOAT7	0	10.5252	10.323	0	11.0253	10.1063	0	0	0	0	0	0	0	0	0	0	0	0	0	0	0	0	0	0	11.5119	10.0643	0	0	0	0	0	0	0	0	11.4783	11.381	0	10.2879	10.3612	0	0	0	0	0	0	0	0	0	0
MCU	0	11.1945	10.2928	0	12.0047	11.1623	0	0	0	11.7025	0	10.9462	0	0	0	0	0	0	0	0	0	0	0	0	0	0	0	13.4422	0	11.8226	0	0	0	0	13.2185	12.298	0	13.6403	12.8541	0	0	0	0	0	0	0	0	0	0
MDH1	0	11.6795	11.2723	12.4266	12.3216	12.6007	14.5545	0	13.8327	12.5179	8.16621	12.1468	0	11.9959	10.6021	8.82575	13.0244	11.5343	0	14.743	14.3733	0	15.2184	15.2514	9.58653	10.9676	11.4677	10.9583	10.3205	10.9654	0	0	0	0	12.4931	12.5853	5.15628	13.0247	13.2739	14.3293	11.0889	14.038	15.0601	0	14.8039	12.7197	0	9.51723	11.7547
MDK	0	11.298	10.7136	0	0	0	0	0	0	0	0	0	0	0	0	0	0	0	0	0	0	0	0	0	0	0	0	0	0	0	0	0	0	0	9.53834	9.51161	0	6.88734	8.4643	0	0	0	0	0	0	0	0	0	0
MEST	0	9.73379	11.1588	8.68636	9.51055	10.9413	0	0	0	0	0	0	0	0	0	0	0	0	0	0	0	0	0	0	0	0	0	9.73351	0	8.9368	0	0	0	0	9.11037	10.9371	0	0	0	0	0	0	0	0	0	0	0	0	0
METTL7B	0	12.7244	12.3194	0	12.6121	12.0055	0	0	0	0	0	0	0	0	0	0	0	0	0	0	0	0	0	0	0	0	0	0	0	0	0	0	0	0	12.5311	12.0101	0	11.2524	11.4802	0	0	0	0	0	0	0	0	0	0
MGST1	0	10.594	12.0935	0	8.65173	11.3602	0	0	0	0	0	0	0	0	0	0	0	0	0	0	0	0	0	0	12.0791	9.64757	0	13.1971	0	12.1416	0	0	0	0	11.4724	11.8074	0	9.37839	10.0664	0	0	0	0	0	0	0	0	0	0
MGST2	0	9.90787	13.5986	0	0	0	0	0	0	0	0	0	0	0	0	0	0	0	0	0	0	0	0	0	12.2197	10.098	0	13.7429	0	12.4703	0	0	0	0	0	0	0	0	0	0	0	0	0	0	0	0	0	0	0
MIF	0	10.6027	10.9993	11.8761	11.9243	12.4358	13.8194	0	12.6139	10.4453	0	12.5733	0	11.7496	10.4124	10.4359	12.9966	11.1397	0	14.3947	13.7694	0	15.0632	14.7642	0	10.2982	11.726	12.1541	9.7238	10.9928	0	0	0	0	11.3453	12.1334	0	10.66	13.4439	13.5001	0	13.0428	14.0211	0	13.612	0	0	0	0
MLST8	0	12.9147	12.9082	0	0	0	0	0	0	0	0	0	0	0	0	0	0	0	0	0	0	0	0	0	0	0	0	10.6375	0	10.5674	0	0	0	0	11.7858	12.5842	10.7728	12.6264	12.3354	0	0	0	0	0	0	0	0	0	0
MLYCD	0	12.6321	12.3378	0	11.7076	12.0719	0	0	0	0	0	0	0	0	0	0	0	0	7.92481	12.5908	12.2248	0	0	0	13.2984	11.2895	0	12.9726	0	11.9224	0	0	0	0	12.204	12.355	0	10.8263	11.8593	10.985	0	11.1302	0	0	0	0	0	0	0
MMS19	0	10.853	10.6357	0	11.3881	10.3411	12.044	0	11.2508	10.8481	10.6418	10.6375	0	0	0	0	0	0	0	0	0	0	12.9726	11.7563	0	0	0	0	0	0	0	0	0	0	12.3592	10.937	0	12.8846	11.1285	0	0	0	0	0	0	0	0	0	0
MRPS27	0	10.0753	9.60595	0	11.4584	11.004	0	0	0	0	0	0	10.7197	10.2416	9.91622	0	0	0	0	0	0	0	0	0	0	0	0	12.5209	10.8335	11.9104	0	0	0	0	10.7945	8.77803	0	13.8616	13.3394	0	0	0	0	0	0	0	12.176	11.5886	0
MRTO4	0	11.7406	10.2652	0	11.703	10.6825	0	0	0	9.91522	0	11.2547	0	0	0	0	0	0	0	11.0189	10.0084	0	10.461	10.2469	0	0	0	10.1308	6.804	8.89609	0	0	0	0	11.5217	9.5792	0	10.8788	11.0976	0	0	0	10.1448	0	9.54074	0	0	0	0
MSMO1	0	12.478	12.2315	0	12.5677	12.3122	0	0	0	0	0	0	0	0	0	0	0	0	0	0	0	0	0	0	12.2387	11.0704	0	12.7271	0	11.7975	0	0	0	0	12.4568	12.4995	0	0	0	9.94073	0	8.93595	0	0	0	0	0	0	0
MTPN	0	10.3455	9.28778	0	10.4868	9.83219	0	0	0	12.2537	0	10.7519	0	0	0	0	0	0	0	12.515	11.2156	0	14.2188	13.456	0	0	0	10.9155	0	10.4487	0	0	0	0	10.2951	9.4043	0	12.4768	12.3648	0	0	0	12.9127	0	11.936	0	0	0	0
MTREX	0	9.39632	9.97432	0	9.79137	10.0963	0	0	0	0	0	0	0	0	0	9.80436	6.38383	9.20276	0	0	0	0	11.9505	10.0906	10.7091	10.1059	10.1463	10.6734	10.82	10.6211	0	0	0	0	10.661	9.47474	9.88153	11.8627	11.3553	0	0	0	0	0	0	7.75589	9.94196	9.24021	0
MYADM	0	12.7354	10.7236	0	13.0726	12.3565	0	0	0	0	0	0	0	0	0	0	0	0	0	0	0	0	0	0	11.7984	9.70183	0	12.0456	0	10.0131	0	0	0	0	13.4207	12.6126	0	0	0	11.505	0	10.2209	0	0	0	0	0	0	0
MYBBP1A	0	10.4258	9.05213	0	10.3113	10.0904	0	0	0	0	0	0	0	0	0	0	0	0	0	0	0	0	0	0	0	0	0	0	0	0	0	0	0	0	0	0	0	0	0	0	0	0	0	0	0	0	0	0	0
MYCBP	0	10.4954	11.3799	0	0	0	0	0	0	0	0	0	12.1759	11.5246	11.8629	0	11.5125	10.6671	0	0	0	0	10.0765	10.8017	12.2185	12.0227	11.7631	10.8031	11.4368	11.4198	0	12.426	10.6535	0	0	0	0	0	0	0	0	0	0	0	0	8.97639	11.8193	10.0479	0
MYCBPAP	0	16.1426	13.646	0	16.4174	16.5669	0	0	0	0	0	0	0	0	0	0	0	0	0	0	0	0	0	0	0	0	0	13.6774	0	11.6312	0	0	0	0	15.6717	15.4173	0	13.2822	16.065	0	0	0	0	0	0	0	0	0	0
MYO1B	0	12.0557	10.6623	0	13.4958	12.6164	0	0	0	13.3151	0	12.3914	0	0	0	0	0	0	0	12.0269	11.4137	10.674	12.5211	12.0745	11.5372	10.122	7.88698	13.6746	7.72955	12.2697	0	0	0	0	13.36	12.5419	8.23256	14.2265	13.9158	13.6025	0	12.3414	11.9636	0	11.2036	0	0	0	0
NAA15	0	9.66565	9.57774	0	10.2902	10.2753	10.9831	0	10.6128	11.5251	0	11.3777	0	9.72163	9.27254	0	0	0	0	10.1769	10.8045	0	12.087	10.9418	9.22511	9.32099	10.4848	10.6595	9.20486	10.1374	0	0	0	0	10.4484	9.75218	0	12.0028	10.9002	12.1143	0	10.7543	11.4759	0	11.2847	0	0	0	0
NAA50	0	10.1831	10.2463	9.09798	11.0156	11.026	0	0	0	0	0	0	0	0	0	0	0	0	0	9.04617	8.606	0	10.1675	10.0984	0	0	0	9.64484	8.48281	9.21808	0	0	0	0	9.7199	9.9662	0	9.51465	10.5486	10.7294	0	10.0785	0	0	0	0	0	0	0
NAALAD2	0	12.756	13.4599	0	0	0	0	0	0	0	0	0	0	0	0	0	0	0	0	0	0	0	0	0	14.3856	11.9747	0	12.4617	0	11.061	0	0	0	14.7078	12.2938	14.2757	12.3243	11.5058	12.1739	0	0	0	0	0	0	0	0	0	0
NACA4P	0	9.84122	9.7336	0	9.47573	10.0127	0	0	0	0	0	0	0	0	0	0	0	0	0	0	0	0	0	0	0	0	0	0	0	0	0	0	0	0	0	0	0	0	0	0	0	0	0	0	0	0	0	0	0
NARS1	0	13.3941	13.0111	0	12.0848	12.5006	12.5905	0	10.1927	11.056	0	12.2169	0	0	0	9.52894	8.52074	8.62063	0	12.3597	11.8637	0	13.172	13.3812	0	0	0	10.2292	0	9.45355	0	0	0	0	12.0319	12.6115	0	0	0	13.2773	0	12.1485	13.2788	0	12.8631	0	0	0	0
NARS2	0	11.8311	10.436	0	11.6318	10.7527	0	0	0	10.9577	0	10.8443	0	0	0	0	0	0	0	0	0	0	0	0	0	10.7721	11.5066	0	0	0	0	0	0	0	11.2528	9.86047	0	11.4064	10.4863	0	0	0	13.495	0	12.5914	0	0	0	0
NCBP2AS2	0	12.2248	9.90891	0	10.8865	10.3773	0	0	0	0	0	0	0	0	0	0	0	0	0	0	0	0	0	0	0	0	0	0	0	0	0	0	0	0	12.3106	11.265	9.6851	12.1582	11.1083	0	0	0	0	0	0	0	0	0	0
NCKAP1	0	9.69687	10.4293	9.58755	9.25915	10.764	0	0	0	10.83	0	8.59384	0	0	0	0	0	0	0	10.4783	9.9356	0	11.0807	11.062	10.2912	10.5889	10.3853	10.0378	10.1549	10.1305	0	0	0	0	8.98321	10.8734	11.2801	10.6768	10.0803	10.2066	0	10.8877	10.3671	0	10.1938	0	0	0	0
NEDD8	0	11.2997	9.45757	0	11.5541	10.6643	0	0	0	12.7263	0	11.6174	0	0	0	0	11.2477	10.0331	0	10.8385	10.4759	0	13.0824	12.1146	9.34286	0	9.22675	10.6748	9.40582	10.0285	0	0	0	0	11.7257	10.2086	0	13.2539	12.5266	10.8445	0	9.38171	12.0069	0	11.1045	0	0	0	0
NELFE	0	12.1281	11.6157	0	12.1219	11.6136	0	0	0	0	0	0	0	9.79146	10.3563	9.9096	9.83879	10.1744	0	10.4182	9.62783	0	11.4702	10.7759	9.71134	10.053	10.1943	11.7985	10.4431	11.4812	0	0	0	0	12.4061	11.866	10.2997	11.7877	12.0159	0	0	0	0	0	0	0	0	0	0
NFS1	0	10.9926	10.7799	0	11.6039	11.2011	0	0	0	11.4477	0	11.178	9.87249	11.7972	10.983	10.751	0	9.40633	0	0	0	0	10.3946	9.46559	0	0	0	0	10.9445	10.3142	0	0	0	0	11.6254	11.0747	10.6073	12.2316	11.6176	0	0	0	10.7405	0	9.93777	10.1246	11.1337	10.6401	9.30334
NHP2	0	11.5913	11.3615	0	0	0	0	0	0	0	0	0	0	0	0	0	0	0	0	0	0	0	0	0	0	0	0	0	0	0	0	0	0	0	11.2598	11.129	0	0	0	0	0	0	0	0	0	0	10.9587	10.8022	0
NIP7	0	11.2715	10.3439	0	11.1408	9.82401	0	0	0	0	0	0	0	0	0	0	0	0	0	0	0	0	0	0	10.0637	9.65487	9.78106	9.82899	10.8278	10.4981	0	0	0	0	10.9166	10.3812	0	9.96415	10.0508	0	0	0	0	0	0	0	0	0	0
NLRP2	0	12.2474	12.1794	0	9.88969	10.9651	0	0	0	0	0	0	0	0	0	0	0	0	0	0	0	0	12.6327	11.9447	0	0	0	11.3743	11.31	11.4016	0	0	0	0	11.596	11.2878	0	10.7506	11.3774	0	0	0	12.3444	0	11.8251	0	0	0	0
NOC2L	0	10.6746	11.7545	0	8.63296	10.7043	0	0	0	0	0	0	0	0	0	0	0	0	0	0	0	10.2543	10.0545	8.54191	12.9752	11.0833	0	12.6253	0	11.4861	0	0	0	0	9.47633	11.703	0	9.13152	10.9737	0	0	0	0	0	0	0	0	0	0
NOC4L	0	12.8617	12.4335	0	12.9241	12.4506	0	0	0	0	0	0	10.4209	9.04084	10.1856	11.0442	8.76193	10.0831	0	0	0	0	0	0	11.6655	10.6882	9.84175	11.7321	9.04547	10.6602	0	0	0	0	12.4465	12.0711	9.81769	11.9093	12.1257	0	0	0	0	0	0	8.78162	11.7073	10.1456	0
NOPCHAP1	0	10.764	9.89013	0	0	0	0	0	0	0	0	0	0	0	0	0	0	0	0	0	0	0	0	0	0	0	0	0	0	0	0	0	0	0	0	0	0	0	0	0	0	0	0	0	0	0	0	0	0
NPM3	0	13.8547	13.2841	9.40067	12.9082	13.0833	0	0	0	13.118	9.19857	11.8444	0	0	0	8.51531	8.5832	8.92322	11.8273	11.3795	11.3462	13.0314	12.0276	11.7375	12.0637	11.4656	9.43403	12.297	10.562	11.6088	0	0	0	0	13.0437	12.3484	8.88719	13.4659	12.7155	11.4945	0	10.4358	11.6686	0	11.1666	0	0	0	0
NSFL1C	0	9.55137	9.313	10.1261	9.33964	9.86798	10.5987	0	9.63645	10.1427	9.73645	10.9073	10.4306	12.3061	11.6563	11.633	13.2164	12.5446	0	12.7761	12.065	0	13.9073	13.4587	7.41236	11.2153	12.4773	9.20069	11.728	11.1321	0	0	0	0	9.57357	8.44584	0	12.0063	11.8365	10.8694	10.4317	10.2193	12.3774	0	11.3296	11.703	10.402	11.2993	11.2338
NSUN2	0	9.40254	8.56834	0	9.84467	8.45393	0	0	0	9.66861	0	8.7105	0	0	0	0	0	0	0	11.7068	11.0788	0	13.2146	13.2278	0	0	0	0	0	0	0	0	0	0	10.1438	10.81	0	11.8689	11.223	12.3435	0	11.4676	13.1444	0	11.8241	0	0	0	0
NUCKS1	0	9.92738	9.13094	0	9.98185	9.56067	0	0	0	0	0	0	0	0	0	0	0	0	0	0	0	0	0	0	0	0	0	0	0	0	0	0	0	0	9.62716	9.33713	0	0	0	0	0	0	0	0	0	0	0	0	0
NUDC	0	10.9107	9.9277	10.741	11.4047	11.3713	12.0122	7.23358	11.7642	9.1807	0	11.7964	0	11.0718	10.887	10.8225	11.7281	11.4167	0	13.4529	12.7228	0	14.376	14.3616	8.08372	10.0904	10.6649	9.60998	10.407	10.6457	0	0	0	0	11.5823	11.261	0	11.2723	12.002	12.1652	10.392	11.8217	13.4177	0	13.0654	11.5056	9.58162	10.6493	10.1264
NUP160	0	11.2743	11.7223	0	11.976	11.2518	0	0	0	0	0	0	0	0	0	0	11.9025	11.4141	0	0	0	0	0	0	11.5432	11.3895	12.1101	11.1735	11.8286	11.683	0	0	0	0	0	0	0	11.7235	11.7199	0	0	0	0	0	0	0	0	0	0
NUP37	0	12.8222	11.285	0	13.0545	11.9209	0	0	0	12.9791	0	12.3432	0	0	0	0	0	0	0	0	0	0	0	0	11.8332	13.2256	12.8387	12.3218	12.265	12.3886	0	0	0	0	13.7053	12.1066	12.4082	13.9913	12.9043	0	0	0	0	0	0	0	0	0	0
NUP93	0	10.1278	9.83547	0	9.79908	9.87646	9.64258	0	10.4146	9.02533	0	8.95897	8.83248	9.37246	9.29819	9.80687	10.7507	9.80956	0	9.35956	9.4826	0	10.6883	10.0117	11.2767	11.6717	10.5944	15.3212	9.50847	14.2356	0	0	0	0	9.97983	11.697	9.77104	9.32069	10.293	9.1402	0	10.6268	11.4123	0	9.9242	11.1596	10.6343	11.5566	9.30654
NUP98	0	9.66003	11.3489	7.73778	12.055	11.2174	0	0	0	0	0	0	0	11.09	10.4573	9.03273	12.9641	11.6373	0	0	0	0	0	0	10.4397	12.1908	13.6121	15.1586	12.9444	14.3226	0	0	0	0	12.1012	11.3647	9.69488	11.6357	11.8034	0	0	0	0	0	0	10.8058	10.8726	10.4915	9.11636
ODR4	0	10.1289	9.95717	0	10.8141	10.0988	0	0	0	0	0	0	0	9.4172	9.48853	0	0	0	0	0	0	0	0	0	0	0	0	10.7587	9.28075	10.741	0	0	0	0	10.71	10.3193	0	10.0744	9.99413	0	0	0	0	0	0	0	0	0	0
ORMDL1	0	12.1347	11.1961	0	12.2834	11.4118	0	0	0	0	0	0	0	0	0	0	0	0	0	0	0	0	0	0	0	0	0	11.7478	0	10.9341	0	0	0	0	12.4791	11.5123	0	12.7092	11.8687	0	0	0	0	0	0	0	0	0	0
OSTC	0	12.8452	12.1836	0	13.3216	12.7798	0	0	0	11.8588	0	10.8054	0	0	0	0	0	0	0	0	0	11.9057	10.3261	10.324	13.0395	11.3846	0	13.7986	0	12.7031	0	0	0	0	13.5837	13.0382	9.79565	13.4236	13.4819	12.0231	0	10.3417	0	0	0	0	0	0	0
P4HA1	0	11.2657	10.9754	0	11.5507	11.6301	0	0	0	0	0	0	0	0	0	0	0	0	0	11.176	10.6991	0	11.8951	11.5474	0	0	0	9.52111	0	10.3766	0	0	0	0	11.1767	11.5606	0	10.9908	11.4197	10.5044	0	11.1875	11.1499	0	11.7397	0	0	0	0
PACSIN2	0	9.11675	8.17575	9.47873	9.49462	9.1001	0	0	0	10.0814	0	10.0684	0	0	0	0	0	0	0	0	0	0	11.1862	10.9547	0	0	0	9.91204	0	8.62509	0	0	0	0	9.88257	9.30923	0	11.4666	10.0726	10.7014	0	10.2199	11.4951	0	10.1808	0	0	0	0
PAIP1	0	9.85915	10.938	0	11.7476	10.7739	10.0998	0	10.5648	11.1453	0	10.4079	0	11.9767	11.3178	9.90489	12.122	10.3529	0	11.0236	10.2428	0	10.7434	11.7118	11.1162	11.7124	11.8409	11.5848	12.0243	11.9463	0	0	0	0	11.9882	11.4392	0	12.6848	11.6299	10.2963	0	11.0708	10.9593	0	11.1763	12.3785	0	11.1392	12.1533
PAK2	0	11.1535	10.495	0	0	0	8.93893	0	11.5292	8.28156	0	11.2552	0	0	0	0	0	0	0	10.7359	11.8726	0	13.0017	12.0537	0	0	0	10.0577	0	9.49055	0	0	0	0	0	0	0	11.4657	10.2476	11.0314	0	8.94429	12.729	0	9.98502	0	0	0	0
PARK7	0	9.71665	10.1427	10.545	10.5926	8.91789	12.1273	0	12.0657	13.0213	0	12.4763	0	10.7166	6.48702	9.93484	11.9531	11.4988	0	12.7294	12.5176	0	14.0345	14.0194	10.025	10.3456	11.312	11.5408	0	10.9778	0	0	0	0	0	0	0	13.2812	12.1971	10.945	0	11.6941	13.6089	0	12.4678	0	0	0	0
PARS2	0	11.4752	8.86511	0	10.9832	10.6576	0	0	0	0	0	0	0	0	0	0	0	0	0	0	0	0	0	0	0	0	0	0	0	0	0	0	0	0	9.64195	9.96645	0	0	0	0	0	0	0	0	0	0	0	0	0
PARVB	0	14.5139	12.4544	0	15.0916	14.4191	0	0	0	13.7665	0	13.4269	0	0	0	0	0	0	0	0	0	0	13.3086	12.0374	0	0	0	0	0	0	0	0	0	0	14.8536	14.2399	0	14.2052	14.5261	0	0	0	12.4111	0	11.794	0	0	0	0
PAXBP1	0	12.5682	12.0654	0	12.232	10.2463	0	0	0	0	0	0	0	10.9129	10.3467	0	0	0	0	0	0	0	0	0	11.7275	11.4368	10.4848	9.97347	11.7891	11.2738	0	0	0	0	12.9778	11.9797	10.6226	12.2899	11.8223	0	0	0	0	0	0	10.9445	9.74541	9.98319	0
PCYOX1	0	9.43727	10.8691	8.60829	10.5248	10.2041	13.1053	0	9.95762	11.5851	0	11.0051	0	0	0	0	0	0	0	9.96821	8.07847	0	11.5927	11.2207	9.06102	7.3462	7.92849	11.2246	0	10.457	0	0	0	0	11.0063	11.1699	0	11.6223	11.692	12.3878	0	13.1624	13.1752	0	12.7814	0	0	0	0
PDCD2L	0	11.0466	9.23396	0	10.5772	10.2633	0	0	0	0	0	0	0	0	0	0	0	0	0	0	0	0	9.67696	8.71461	0	0	0	0	0	0	0	0	0	0	10.8751	9.36843	0	11.0882	10.41	0	0	0	0	0	0	0	0	0	0
PDLIM5	0	12.1263	12.1969	9.31073	13.1864	11.9646	12.5708	10.2714	11.7243	13.6422	10.9071	13.9356	10.7464	11.6821	10.8686	10.1162	11.2228	10.2402	0	11.4517	11.2003	0	11.6143	11.3984	10.2791	11.1478	11.2932	13.4755	12.3675	13.2344	0	0	0	0	13.3115	12.6195	0	13.5161	13.2555	12.4956	11.1438	12.6588	13.7769	11.2539	13.1166	11.0056	11.4071	10.9994	8.55478
PEG10	0	11.8552	10.9613	10.8127	12.2939	11.5199	0	0	0	11.8043	0	11.0175	0	10.6155	9.11593	8.90029	10.2641	4.9944	0	11.2142	11.257	0	12.6195	12.1362	10.4075	10.6277	10.0817	10.3573	10.2576	9.25186	0	0	0	0	12.7592	11.9119	0	12.9966	12.8581	11.5294	0	10.2329	11.9512	0	10.5594	0	0	0	0
PELO	0	11.8662	10.7051	0	11.8402	10.204	0	0	0	0	0	0	0	0	0	0	0	0	0	0	0	0	0	0	0	0	0	10.1969	9.46648	10.4443	0	0	0	0	11.9803	10.7846	0	12.0369	11.0294	0	0	0	0	0	0	0	0	0	0
PES1	0	10.114	8.94128	0	10.0797	8.9802	0	0	0	0	0	0	0	0	0	0	0	0	0	0	0	0	0	0	0	0	0	0	0	0	0	0	0	0	9.3466	8.77406	0	9.20908	9.37721	0	0	0	0	0	0	0	0	0	0
PEX16	0	11.0836	10.3223	0	11.0498	10.2833	0	0	0	0	0	0	0	0	0	0	0	0	0	0	0	0	0	0	0	0	0	0	0	0	0	0	0	0	0	0	0	10.6149	10.2943	0	0	0	0	0	0	0	0	0	0
PEX19	0	12.097	11.1793	0	10.5241	9.85406	0	0	0	0	0	0	0	0	0	0	0	0	0	0	0	0	10.2845	8.24596	11.3568	9.6458	0	11.9616	0	10.7154	0	0	0	0	10.0408	9.9814	0	10.0077	11.7039	0	0	0	0	0	0	0	0	0	0
PEX5	0	11.97	9.92463	0	0	0	0	0	0	0	0	0	11.0815	10.8592	10.9271	10.7869	10.4964	10.5341	0	0	0	0	0	0	0	0	0	0	10.9626	10.058	0	0	0	0	11.6933	10.9411	0	11.0863	11.3658	11.2435	9.64153	10.218	11.5357	0	10.259	0	0	0	10.6474
PI4K2A	0	11.8064	10.7382	0	11.7503	11.0237	0	0	0	0	0	0	0	0	0	0	0	0	0	0	0	0	0	0	0	0	0	0	0	0	0	0	0	0	12.3437	11.9404	0	12.5582	11.7685	0	0	0	0	0	0	0	0	0	0
PIGK	0	8.0167	7.28216	0	0	0	0	0	0	0	0	0	0	0	0	0	0	0	0	0	0	0	0	0	0	0	0	0	0	0	0	0	0	0	7.43392	8.35394	0	6.30991	7.83343	0	0	0	0	0	0	0	0	0	0
PIGS	0	11.4376	10.3594	0	11.5117	11.1992	0	0	0	0	0	0	0	0	0	0	0	0	0	0	0	0	0	0	0	0	0	11.1374	0	8.71335	0	0	0	0	11.5739	10.9232	4.62243	11.0871	10.5101	0	0	0	0	0	0	0	0	0	0
PIGT	0	9.05592	9.71643	0	9.38406	8.80929	0	0	0	0	0	0	0	0	0	0	0	0	0	0	0	0	0	0	0	0	0	10.0685	0	8.66486	0	0	0	0	9.37219	9.69016	0	8.2274	8.52808	0	0	0	0	0	0	0	0	0	0
PIK3CA	0	12.2273	11.1758	0	11.5673	11.0855	0	0	0	0	0	0	0	0	0	0	0	0	0	0	0	0	0	0	0	0	0	0	0	0	0	0	0	0	12.6092	11.8359	9.90971	11.5602	10.9173	0	0	0	0	0	0	0	0	0	0
PIN1	0	11.0922	10.0604	0	9.9283	10.707	0	0	0	0	0	0	0	0	0	0	0	0	0	10.5693	9.44596	0	11.2946	11.5001	0	0	0	0	10.8631	9.69424	0	0	0	0	8.49891	10.1459	0	0	0	9.08591	0	8.70568	9.90308	0	9.9725	0	0	0	0
PIP4K2A	0	11.9629	11.7889	0	11.9694	11.6564	0	0	0	0	0	0	0	0	0	0	0	0	0	0	0	0	0	0	11.1782	11.0019	9.20352	11.1134	10.6569	11.1186	0	0	0	0	12.0381	11.9631	10.4463	9.02269	11.2267	9.4373	0	8.58549	0	0	0	0	0	0	0
PIP4K2B	0	12.5954	11.2678	0	11.7388	10.8643	0	0	0	0	0	0	0	0	0	0	0	0	0	0	0	0	0	0	0	0	0	0	0	0	0	0	0	0	12.8082	12.0818	0	11.3637	11.2687	0	0	0	0	0	0	0	0	0	0
PLCB1	0	9.70995	11.2574	0	0	0	0	0	0	12.151	0	10.8749	0	0	0	0	0	0	0	0	0	0	0	0	0	0	0	0	0	0	0	0	0	0	0	0	0	0	0	10.1075	0	9.6601	0	0	0	0	0	0	0
PLEKHG3	0	8.72642	8.90167	0	8.76197	9.47596	12.8012	0	12.0841	13.0979	0	12.8539	0	11.4487	11.1614	0	12.4184	11.1506	0	13.4418	12.9465	0	13.339	13.0432	0	11.7872	12.558	9.56466	12.429	11.5625	0	0	0	0	8.92047	10.1008	0	9.49378	9.3185	13.3966	0	12.7538	13.3236	10.2256	12.7303	0	0	0	0
PLPBP	0	13.3484	12.8022	10.2216	13.1246	12.6792	11.837	0	10.2511	12.4381	8.76045	11.8185	0	9.59628	9.37187	9.14713	9.15568	0	0	11.0133	9.87626	0	12.3017	11.6675	9.13287	9.48596	0	10.1487	8.35302	10.6058	0	0	0	0	12.6707	11.833	0	12.8554	12.4911	12.274	0	9.84998	12.2495	0	10.864	0	0	0	0
PLS3	0	7.64353	8.13101	10.881	6.38704	8.08353	13.7106	0	12.2795	14.5521	0	14.571	0	10.359	6.38047	7.98652	11.0147	10.5819	0	14.249	13.9146	0	12.8656	14.1952	8.47324	9.861	10.8547	8.54321	8.54917	9.43252	0	0	0	0	8.63938	9.61651	0	10.5957	10.795	12.1174	0	12.9117	14.9947	11.2573	15.1342	10.691	9.14364	9.48865	10.23
PNPO	0	13.4922	12.0969	0	12.8534	12.4477	0	0	0	12.3034	0	11.5947	0	11.4431	10.6339	9.55369	13.3077	11.7205	0	12.6391	12.0393	0	14.093	13.3216	11.172	11.5581	11.4097	0	10.6636	9.97674	0	0	0	0	12.5695	11.9007	0	12.1186	12.28	0	0	0	12.4808	0	11.7125	0	0	0	0
POLDIP2	0	11.0379	11.1843	10.2311	9.71514	10.2107	0	0	0	11.5498	0	11.301	10.545	10.8576	10.4869	9.58864	9.79589	9.49433	0	10.8072	10.1011	0	11.0015	11.4772	12.0483	11.5748	11.3425	11.6835	11.5584	11.9162	0	0	0	0	10.9477	11.4892	9.43486	11.5229	11.4908	11.8822	0	11.1381	12.0629	0	11.9863	10.6997	9.91347	9.73664	8.98188
POLR2H	0	10.7656	9.848	9.32224	11.0189	10.2757	0	0	0	10.223	0	11.1985	9.30723	9.50868	9.97082	9.84037	9.99159	9.85262	0	9.92126	9.71724	0	11.1447	10.4837	9.44131	9.71565	9.9354	12.1217	10.2317	12.0173	0	0	0	0	10.7015	9.87908	7.87492	10.5404	10.8442	9.51248	0	9.03694	0	0	0	0	0	0	0
PON2	0	12.3884	10.961	0	12.6057	12.1721	0	0	0	12.5852	0	11.5309	0	0	0	0	0	0	0	0	0	0	12.3234	11.4862	0	0	0	10.8121	8.9387	10.104	0	0	0	0	12.7907	12.3309	0	13.5147	12.802	12.9404	0	11.77	13.5533	0	12.3016	0	0	0	0
PPA1	0	10.8308	10.6277	0	8.85999	9.83301	12.5455	0	11.2654	10.5949	0	10.0445	0	11.1977	9.87023	0	12.5782	10.8969	0	14.5458	13.8541	0	15.6107	15.6482	12.4244	12.0619	11.4714	13.3635	10.6016	12.6699	0	0	0	0	7.94304	9.85384	0	11.5566	12.1723	11.9421	0	11.6381	13.7163	0	13.3384	10.4484	9.52501	9.99661	0
PPIH	0	11.3778	10.8601	0	11.5661	10.8435	0	0	0	0	0	0	0	0	0	0	10.7987	10.2177	0	0	0	0	0	0	0	0	0	0	0	0	0	0	0	0	11.7221	10.8501	0	10.5579	10.8985	0	0	0	0	0	0	10.4556	10.4659	10.4732	0
PPIL3	0	11.9634	10.9602	0	11.4361	11.0215	0	0	0	9.16133	8.81919	9.752	12.0822	10.0825	11.8653	10.0737	9.6619	9.82106	0	0	0	0	0	0	10.0094	9.9046	9.72375	8.83223	10.7613	9.80613	0	12.7697	11.8417	0	10.1508	9.80698	0	0	0	0	0	0	0	0	0	7.83738	12.2034	10.828	0
PPP1R9B	0	7.91436	6.63263	0	0	0	0	0	0	14.6111	0	13.571	0	0	0	0	0	0	0	12.1727	11.1918	0	11.7619	10.7058	0	0	0	0	0	0	0	0	0	0	6.82622	7.36243	0	8.65693	6.64119	9.86116	0	8.93823	11.548	0	10.1422	0	0	0	0
PPP2CA	0	12.2615	11.5148	11.0591	12.2912	12.2606	13.294	0	11.9056	12.7264	0	12.6852	10.2336	12.7975	11.6798	11.5901	12.8539	12.0906	0	13.2888	12.6015	0	14.1806	13.8699	11.8894	12.5086	12.736	13.329	12.288	13.0203	0	0	0	0	12.1235	11.8748	9.76733	11.5361	12.8762	12.351	9.8438	12.7067	13.3818	9.70765	13.259	11.9404	11.7709	11.7015	11.7028
PPP6C	0	12.0627	11.7682	9.99803	12.3355	11.9253	0	0	0	11.815	0	10.8555	0	11.0602	9.39677	10.3672	11.7664	10.6901	0	11.3853	10.4741	0	12.5571	12.1986	10.8221	10.5661	11.3277	10.6031	11.0366	11.1017	0	0	0	0	12.0242	11.6984	0	12.4839	12.1727	11.5646	0	11.0503	11.7162	0	11.2554	0	0	0	0
PRCP	0	10.8069	10.8614	0	11.3275	12.1954	12.5309	0	9.57961	10.7801	0	12.312	0	10.7837	11.3433	10.3124	10.7334	8.94986	0	12.4187	11.2828	0	13.1304	12.6766	0	0	0	13.551	9.82872	12.6719	0	0	0	0	11.8805	12.1088	0	12.1119	11.9224	13.0112	0	11.941	13.076	0	12.5885	0	0	0	0
PRDX3	0	11.5879	11.4212	0	11.5529	12.0524	12.6449	0	12.0391	0	0	0	0	12.2626	11.5661	11.1982	13.2904	12.6385	0	12.3957	11.7266	0	12.8993	13.2386	10.5575	11.5964	12.9334	14.754	12.5692	14.147	0	0	0	0	0	0	0	13.5978	13.5959	12.8942	0	12.5103	12.5102	0	13.1317	12.4301	10.717	12.2553	0
PRKRA	0	11.2284	10.3915	0	10.0336	9.98204	0	0	0	0	0	0	0	0	0	0	0	0	0	0	0	0	0	0	0	0	0	0	0	0	0	0	0	0	10.1344	10.2093	0	10.134	10.1899	0	0	0	0	0	0	0	0	0	0
PRKRIP1	0	11.2077	9.6021	0	0	0	0	0	0	0	0	0	0	0	0	0	0	0	0	0	0	0	0	0	0	0	0	0	0	0	0	0	0	0	11.409	9.79588	0	11.2951	10.5362	0	0	0	0	0	0	0	0	0	0
PRMT3	0	12.9251	11.6038	0	10.7587	10.8309	0	0	0	10.3662	0	10.3283	0	9.88234	10.3039	9.68527	9.62102	9.63953	0	10.5815	9.21584	0	12.0694	11.1696	10.2226	9.68019	10.4219	0	10.5505	8.91703	0	0	0	0	12.1501	12.0204	11.2377	9.87322	11.0061	10.4102	0	9.72982	10.6742	0	9.35389	0	0	0	0
PROX1	0	13.6223	13.3061	11.1689	15.2024	15.1639	0	0	0	12.384	0	12.4977	0	10.3501	10.1229	0	0	0	0	12.8412	10.5278	0	14.0674	12.7703	0	0	0	0	11.9474	11.2796	0	0	0	0	14.6822	13.3726	0	13.9582	14.6418	0	0	0	0	0	0	0	0	0	0
PRPF40A	0	12.0659	11.4328	0	0	0	0	0	0	0	0	0	11.7856	11.1052	11.0505	0	0	0	0	0	0	0	0	0	11.2721	11.4022	11.9815	12.4508	11.656	11.7363	0	0	0	0	0	0	12.4092	11.5502	11.0437	0	0	0	0	0	0	10.3092	11.754	12.0694	0
PRXL2A	0	10.249	9.60084	0	10.2673	10.9311	0	0	0	10.0481	0	9.76611	0	0	0	0	0	0	0	0	0	0	0	0	0	0	0	11.2845	0	10.3822	0	0	0	0	0	0	11.1097	11.0958	11.6581	0	0	0	10.1762	0	9.65832	0	0	0	0
PTGES3	0	13.8183	13.0302	11.8947	13.7071	13.5576	14.5129	0	13.2332	14.9384	0	14.2079	0	12.6652	11.5962	0	12.7144	10.5431	0	14.4327	13.7022	0	15.9041	15.414	12.2968	12.0686	12.5211	12.2351	12.2973	12.3163	0	0	0	0	14.2487	13.6588	10.6867	14.4751	14.2402	14.5448	0	13.5645	15.2196	12.1903	14.764	0	0	0	12.3048
PTMS	0	11.382	9.51962	0	0	0	0	0	0	11.8057	0	10.5587	0	0	0	0	0	0	0	0	0	0	9.41567	9.27902	0	0	0	0	0	0	0	0	0	0	0	0	0	11.865	10.6044	0	0	0	0	0	0	0	0	0	0
PTPN1	0	11.3105	10.6382	0	11.7122	10.7426	0	0	0	12.1321	0	10.3228	0	0	0	0	0	0	0	8.80277	8.04426	0	10.9075	9.67552	0	0	0	13.5092	0	11.8218	0	0	0	0	12.8836	12.275	0	13.2843	12.7033	11.8435	0	9.92752	11.3667	0	9.59851	0	0	0	0
QARS1	0	13.0308	12.1356	6.59196	12.6605	12.5492	11.8316	0	10.326	10.4761	0	10.106	0	9.38931	8.90871	0	11.4535	10.0838	0	11.2809	10.4776	0	12.947	12.597	10.9389	10.6843	9.89299	10.9681	9.4333	10.373	0	0	0	0	12.8888	12.8177	7.45236	12.185	12.4192	12.4671	0	11.9215	13.197	0	11.9082	0	0	0	0
QPCTL	0	9.72419	9.56265	0	0	0	0	0	0	0	0	0	0	0	0	0	0	0	0	0	0	0	0	0	0	0	0	0	0	0	0	0	0	0	0	0	0	0	0	0	0	0	0	0	0	0	0	0	0
RAB10	0	11.1007	10.4477	11.6387	11.419	10.8597	10.9106	0	10.0252	12.9661	0	12.2667	0	0	0	8.74042	8.85786	8.62706	11.5553	9.50133	9.10834	12.4649	10.9146	10.1535	11.457	11.5457	9.1936	10.3162	10.2473	9.97257	0	0	0	0	12.0807	11.668	0	12.4399	12.3603	11.4702	0	11.0732	11.496	0	10.6874	0	0	0	0
RAB11B	0	11.0329	10.8059	11.348	12.7294	12.5342	13.42	0	12.8512	12.1582	0	12.9442	0	10.6724	10.3439	10.2879	12.2482	11.4289	10.1663	12.9651	12.5975	0	13.8555	13.2617	11.4109	10.8442	10.2091	13.4583	10.0009	12.9907	0	0	0	0	12.3506	12.9211	0	13.9707	13.7779	13.3853	9.27048	13.1141	13.4644	0	12.8801	11.1466	9.21512	11.1042	11.0306
RAB14	0	9.72974	9.91671	0	10.4625	9.74994	0	0	0	0	0	0	0	0	0	0	0	0	0	0	0	0	10.0329	10.0154	0	0	0	11.9651	0	10.4985	0	0	0	0	11.7516	11.5286	0	11.3457	11.968	9.28288	0	10.4598	10.7695	0	8.99149	0	0	0	0
RAB35	0	11.969	11.5462	0	11.84	11.62	0	0	0	11.5983	0	11.5062	0	0	0	0	0	0	0	0	0	0	11.5508	12.426	12.0947	10.6149	0	12.9715	0	11.7087	0	0	0	0	13.7065	12.5298	0	13.2723	13.129	12.7221	0	11.9463	13.0335	0	11.1073	0	0	0	0
RAB5IF	0	9.02357	8.28147	0	0	0	0	0	0	0	0	0	0	0	0	0	0	0	0	0	0	0	0	0	0	0	0	0	0	0	0	0	0	0	0	0	0	0	0	0	0	0	0	0	0	0	0	0	0
RAB7A	0	12.098	13.377	10.719	12.7171	12.9847	14.7632	11.5211	13.7499	13.588	0	13.5422	0	12.112	10.0899	0	14.1081	12.1136	0	14.2586	13.9332	10.9574	12.3731	14.3999	13.1191	13.2447	14.0069	16.108	11.8438	14.9504	0	0	0	0	12.975	13.5726	0	13.5196	13.8143	14.4342	0	14.5959	14.4855	0	14.5668	11.9917	10.1593	11.1639	0
RAD23B	0	10.3959	8.89912	0	0	0	12.0272	0	9.80702	0	0	0	0	10.0253	9.48802	6.5131	11.4956	9.77567	0	12.8577	12.5045	0	14.7863	13.8453	9.80611	10.2911	10.9314	13.2609	9.65283	12.2673	0	0	0	0	0	0	0	12.0795	11.2604	11.0416	0	10.241	13.077	0	12.3399	0	0	0	0
RALA	0	9.48004	11.0153	0	10.9754	11.7	0	0	0	11.9806	0	10.4258	0	0	0	0	0	0	0	0	0	0	10.9577	9.61199	0	0	0	12.4695	0	11.3284	0	0	0	0	11.3587	11.216	0	12.2826	13.2773	12.3478	0	10.868	0	0	0	0	0	0	0
RAP1B	0	14.7424	14.2074	0	14.5035	13.4857	12.6588	0	11.4079	13.5384	0	12.7588	0	0	0	0	0	0	0	12.0669	11.468	11.8967	12.1537	12.5488	13.0425	10.715	9.17173	13.9174	9.16	12.707	0	0	0	0	14.3513	13.5882	9.51487	14.1037	13.8728	13.8609	0	11.9489	12.6303	0	12.0503	0	0	0	0
RASA1	0	11.3498	9.67442	0	9.87583	9.38057	0	0	0	0	0	0	0	0	0	0	0	0	0	0	0	0	0	0	0	0	0	0	0	0	0	0	0	0	0	0	0	0	0	0	0	0	0	0	0	0	0	0	0
RBIS	0	11.5358	9.967	0	11.5765	10.0602	0	0	0	0	0	0	0	0	0	0	0	0	0	0	0	0	0	0	0	0	0	0	0	0	0	0	0	0	11.1478	10.1926	0	10.2395	9.77471	0	0	0	0	0	0	0	0	0	0
RBM12	0	11.5893	12.0421	10.6845	9.59083	11.927	11.1086	9.45732	10.7984	0	0	0	10.9028	11.0572	11.1737	10.7289	11.0585	11.0541	0	11.6515	11.0673	10.3016	9.94079	11.3053	10.7133	10.9969	10.7391	11.0692	10.9037	10.9482	0	0	0	0	0	0	0	0	0	0	0	0	0	0	0	11.2807	10.5002	10.5999	0
RBM4	0	12.4992	11.8336	0	10.3747	11.0906	0	0	0	0	0	0	0	10.2621	10.2033	10.9596	10.0132	10.0879	0	0	0	0	0	0	12.3928	11.1581	10.5733	11.3838	10.3772	10.9325	0	0	0	0	10.9479	11.8343	0	10.7814	9.58059	0	0	0	0	0	0	9.88402	10.8449	9.05175	0
RBMS1	0	10.725	11.4568	10.2834	11.3507	10.8663	10.7885	11.7659	10.8717	0	0	0	11.2491	12.7534	12.3676	11.8593	12.2418	12.188	0	0	0	0	0	0	11.4239	11.9461	12.2839	13.7103	12.73	13.644	0	11.9582	11.4558	0	0	0	0	9.94471	10.58	0	0	0	0	0	0	11.8583	12.0867	11.9188	11.4183
RCC1L	0	9.38632	9.3612	0	9.30586	9.33104	0	0	0	0	0	0	0	0	0	0	0	0	0	0	0	0	0	0	0	0	0	0	0	0	0	0	0	0	9.22202	10.0186	0	0	0	0	0	0	0	0	0	0	0	0	0
RCL1	0	11.7157	11.3629	0	12.3293	12.0137	0	0	0	0	0	0	11.3833	12.3794	12.1125	11.6949	11.3709	11.6801	0	0	0	0	0	0	10.8215	12.0385	13.0127	10.3369	12.6539	12.06	0	0	0	0	11.6012	11.2199	11.3995	10.9857	11.1878	0	0	0	0	0	0	11.4572	11.8546	11.3422	9.71733
RDH11	0	11.4846	10.824	0	11.5082	11.2176	0	0	0	0	0	0	11.4399	0	9.8107	11.0722	0	10.0318	0	0	0	0	0	0	11.1551	10.5909	9.37822	10.8694	7.68951	9.45277	0	0	0	0	11.7022	12.0903	9.7301	12.2224	11.602	11.5553	0	11.0101	11.0059	0	10.8298	0	0	0	0
RDH14	0	11.238	9.84219	0	11.3171	10.2616	0	0	0	0	0	0	0	0	0	0	0	0	0	0	0	0	0	0	0	0	0	0	0	0	0	0	0	0	11.8111	11.0097	0	11.7209	11.1584	0	0	0	0	0	0	0	0	0	0
RDX	0	14.3111	13.5853	10.7341	14.4112	13.8495	0	0	0	0	0	0	0	0	0	0	0	0	0	0	0	0	0	0	0	0	0	0	0	0	0	0	0	0	14.5027	13.7918	11.3768	14.6078	14.1666	0	0	0	12.9062	0	11.7089	0	0	0	0
RER1	0	12.2622	12.1964	0	11.2586	12.0037	0	0	0	0	0	0	0	0	0	0	0	0	0	0	0	0	0	0	12.8122	10.4889	0	12.5981	0	10.6212	0	0	0	0	10.4577	12.2935	0	8.49735	9.28537	0	0	0	0	0	0	0	0	0	0
RFC3	0	12.2987	11.7499	0	11.386	11.9249	0	0	0	0	0	0	0	10.1633	10.3363	10.7596	11.31	10.7587	0	0	0	0	0	0	10.9051	11.4017	12.0739	11.6859	11.9765	10.8249	0	0	0	0	11.711	11.5346	11.4063	9.89211	10.8057	0	0	0	0	0	0	0	0	0	0
RFC5	0	11.3286	10.0391	0	11.0807	10.6745	0	0	0	0	0	0	10.551	8.85518	9.82147	10.2513	10.9524	10.5058	0	0	0	0	0	0	10.5863	11.3973	10.9317	10.5268	8.84513	10.0675	0	0	0	0	10.5397	10.5022	10.8018	10.6893	9.27902	0	0	0	0	0	0	9.72122	10.7976	10.3214	0
RGL2	0	12.666	10.2726	0	12.3577	11.0558	0	0	0	0	0	0	0	0	0	0	0	0	0	0	0	0	0	0	0	0	0	0	0	0	0	0	0	0	12.7085	11.75	0	12.822	11.6929	0	0	0	8.3462	0	5.29175	0	0	0	0
RHOA	0	12.7673	12.5754	11.3198	13.7287	13.8106	14.0758	10.6327	13.0722	13.4222	0	14.1254	0	10.7424	9.85896	0	0	0	10.8877	14.2954	13.2753	11.4503	14.3813	14.6095	12.5618	12.3255	11.9379	14.1955	11.6327	13.2849	0	0	0	0	14.4163	14.1034	0	15.4273	15.1769	14.9762	8.74029	13.6864	14.0146	9.81019	13.9199	0	0	0	0
RIN2	0	12.3902	11.8922	0	9.22822	10.7779	0	0	0	0	0	0	0	0	0	0	0	0	0	0	0	0	0	0	0	0	0	0	0	0	0	0	0	0	10.168	12.8661	0	0	0	0	0	0	0	0	0	0	0	0	0
RNF121	0	11.6373	11.2973	0	10.3862	11.3126	0	0	0	0	0	0	0	0	0	0	0	0	0	0	0	0	10.6879	11.7711	0	0	0	0	0	0	0	0	0	0	10.4102	11.4172	0	0	0	0	0	0	0	0	0	0	0	0	0
RNH1	0	10.8143	11.1867	9.81501	10.2079	11.7587	13.8049	0	12.7302	10.2337	0	11.1558	7.29352	11.1385	10.0428	10.8132	12.5938	11.5675	0	13.7445	13.2166	0	14.8376	14.7663	9.39522	10.6802	10.9814	11.9405	9.28623	11.1765	0	0	0	4.63732	10.7576	11.9135	0	10.5508	12.1823	13.4869	9.58415	13.0975	14.3317	8.07087	13.9528	11.2876	10.0364	9.98665	10.6664
RNPEP	0	10.5392	10.8334	0	9.9346	10.7852	0	0	0	0	0	0	11.227	9.2055	9.8697	0	0	0	0	11.06	10.1781	0	12.6594	11.645	0	0	0	9.41327	11.267	11.2633	0	0	0	0	9.32658	10.7642	0	9.55115	9.39466	0	0	0	8.98816	0	10.3766	0	0	0	0
RPL26L1	0	9.55463	9.51469	0	0	0	0	0	0	0	0	0	0	0	0	0	0	0	0	0	0	0	9.5932	9.22763	0	0	0	0	0	0	0	0	0	0	0	0	0	0	0	10.1376	0	11.0162	0	0	0	0	0	0	0
RPL3L	0	14.2639	13.3808	0	14.7853	14.0755	0	0	0	14.8133	0	15.5592	0	0	0	0	0	0	0	0	0	0	15.7939	14.1973	0	0	0	0	0	0	0	0	0	0	15.8172	15.2592	0	14.346	14.7191	14.9757	0	12.1155	13.335	0	11.897	0	0	0	0
RPS27L	0	13.245	13.4603	11.1821	12.1304	12.8554	10.2577	11.7576	11.2987	0	0	0	11.6373	11.7537	12.6262	12.9077	11.4032	12.0097	11.4811	11.558	11.6918	0	9.98293	11.16	12.3175	11.7105	0	9.57633	11.9753	11.3225	0	0	0	11.9029	10.7076	12.3001	0	0	0	0	10.4969	10.113	0	0	0	9.85859	12.9643	13.4817	0
RPS6KA3	0	10.6683	9.57108	0	10.3499	10.3139	0	0	0	10.7885	0	10.9199	0	0	0	0	0	0	0	12.0407	11.31	0	13.3435	12.8641	10.42	8.47664	6.78908	9.50238	7.63441	9.15041	0	0	0	0	10.8011	10.5256	0	10.1822	11.0396	0	0	0	12.2476	0	11.5344	0	0	0	0
RRM1	0	10.57	10.7645	10.0037	10.6999	11.2912	0	0	0	8.68886	0	10.3849	11.8539	9.4164	8.12042	9.92766	9.24757	7.74169	0	12.3512	11.1736	0	13.5566	12.6787	0	0	0	4.52362	8.19128	8.35683	0	0	0	0	9.65379	11.1299	0	9.14334	9.34381	11.7801	0	11.3871	12.8827	0	11.5597	0	0	0	0
RRP15	0	11.4795	10.126	0	0	0	0	0	0	0	0	0	10.4105	9.62138	10.2062	10.9993	8.54005	10.0363	0	10.2033	9.7354	0	0	0	11.2884	11.216	10.3801	11.4765	9.74853	11.0395	0	0	0	0	0	0	11.1688	11.2113	10.6364	0	0	0	0	0	0	0	0	0	0
RTN3	0	14.8836	14.5695	11.7055	14.8223	14.6823	12.8298	9.52785	12.065	13.1451	12.9684	13.0411	9.52348	10.6789	10.079	10.4331	11.253	10.8747	12.2279	11.6282	11.4894	11.4168	12.8067	12.2903	13.6636	12.7927	10.9661	13.5507	10.2338	12.7822	0	0	0	10.5936	14.7685	14.4242	11.7572	14.2476	14.3975	13.2959	0	12.9038	13.364	0	12.8112	9.68209	9.9265	10.2946	9.81751
RWDD1	0	12.1243	9.97325	0	0	0	0	0	0	15.5454	0	15.4017	0	0	0	0	0	0	0	0	0	0	12.4107	9.50236	0	0	0	0	0	0	0	0	0	0	0	0	0	0	0	0	0	0	0	0	0	0	0	0	0
SAAL1	0	15.1291	14.5708	9.52103	14.8103	14.6323	0	0	0	0	0	0	0	0	0	0	0	0	11.7411	8.17597	8.5508	11.478	10.2822	9.48758	13.6399	12.0792	0	13.7064	0	12.041	0	0	0	0	14.7493	15.0008	11.2699	13.4724	14.0177	11.5208	0	10.5722	11.3182	0	10.1797	0	0	0	0
SAMHD1	0	12.663	12.9113	0	13.5938	12.826	12.4956	0	16.9914	0	0	0	0	0	0	0	0	0	0	12.6691	12.1667	0	13.3665	13.0961	0	0	0	14.002	9.86264	12.6829	0	0	0	0	13.1164	12.8491	0	13.3064	13.8709	12.9667	0	12.6302	12.7282	0	12.6148	0	0	0	0
SAP18	0	11.3279	10.38	0	10.1267	9.3278	0	0	0	0	0	0	0	0	0	0	0	0	0	0	0	0	0	0	0	0	0	0	0	0	0	0	0	0	0	0	0	11.2855	10.3988	0	0	0	0	0	0	0	0	0	0
SAR1A	0	11.7668	11.857	12.9637	11.2928	11.2812	13.8057	0	13.4079	12.9284	0	11.584	9.6801	11.9697	11.5017	11.3029	13.053	12.681	0	13.5064	13.4767	0	13.4792	13.8788	12.5286	12.7467	12.7044	13.1382	11.5118	12.5053	0	0	0	0	12.8145	13.0941	11.8132	13.4091	13.119	12.3453	12.014	13.4778	14.2127	11.7425	13.6514	12.7012	10.9582	11.984	12.2121
SARS1	0	9.73454	10.6007	0	0	0	0	0	0	0	0	0	0	0	0	0	0	0	0	11.474	10.8678	0	11.4675	12.2092	0	0	0	12.1738	0	10.5683	0	0	0	0	0	0	0	0	0	10.3036	0	12.5844	11.5461	0	12.8064	0	0	0	0
SCAF4	0	12.8855	12.3593	10.1467	12.1086	11.9507	0	0	0	0	0	0	0	10.9344	9.89517	0	0	0	0	0	0	0	10.6619	10.1005	11.4303	10.9329	10.8419	10.6975	11.7034	11.5449	0	0	0	12.293	12.0988	12.1865	13.4291	11.3213	12.0367	0	0	0	0	0	0	0	0	0	0
SCD	0	11.5217	12.3649	0	12.7539	11.7385	0	0	0	0	0	0	0	0	0	0	0	0	0	0	0	0	0	0	14.3669	13.3218	0	13.0501	0	12.4379	0	0	0	0	12.7814	12.2181	0	12.6354	10.8672	0	0	0	0	0	0	0	0	0	0
SCP2	0	10.392	10.1927	8.7087	8.94563	10.5534	0	0	0	0	0	0	9.33969	10.1972	9.87626	7.97493	9.18052	9.18435	0	11.6659	11.445	0	12.6847	12.6683	10.5676	9.79896	10.1727	12.4212	8.48651	10.8522	0	0	0	0	0	0	0	11.2391	11.5198	0	0	0	0	0	0	9.54123	11.3948	11.607	6.37229
SDAD1	0	12.054	11.5255	0	11.3627	11.5494	0	0	0	0	0	0	0	0	0	0	0	0	0	0	0	0	0	0	0	0	0	10.703	11.3468	10.951	0	0	0	0	10.4735	10.9631	0	10.3053	11.0345	0	0	0	0	0	0	0	0	0	0
SDF2	0	10.7619	8.90814	0	11.2477	10.7865	0	0	0	0	0	0	0	0	0	0	0	0	0	0	0	0	0	0	0	0	0	0	0	0	0	0	0	0	11.3885	10.1365	0	11.6573	10.778	0	0	0	0	0	0	0	0	0	0
SEC11A	0	11.7892	10.3992	0	11.5314	10.9641	0	0	0	0	0	0	0	0	0	0	0	0	0	0	0	0	0	0	0	0	0	10.3867	0	9.78468	0	0	0	0	11.8957	11.7871	0	11.1339	11.8208	0	0	0	0	0	0	0	0	0	0
SEC23A	0	12.0715	10.4663	9.96939	12.6086	11.9207	12.0641	0	9.68281	14.109	9.58585	13.3422	10.8008	10.8797	10.6763	10.5938	10.3074	10.2244	0	14.0496	13.1605	0	14.4001	13.5429	9.50437	9.84718	11.3339	10.8266	11.9017	11.4805	0	0	0	0	13.7623	12.5069	10.788	13.5744	12.9844	13.4454	7.55597	11.2325	13.4348	0	12.4895	10.3069	9.27789	10.2429	10.0835
SEC23B	0	11.327	9.8757	0	10.909	10.4939	0	0	0	9.32242	0	9.6709	0	0	0	0	0	0	0	11.1561	9.70151	0	11.582	10.4528	0	0	0	0	9.57154	9.39884	0	0	0	0	11.6688	10.7706	9.39142	11.3422	11.0607	0	0	0	11.2957	0	9.76374	0	0	0	0
SEC24C	0	10.9513	10.6775	0	9.7146	11.4399	11.5223	0	9.60448	0	0	0	0	11.0162	9.49085	9.49851	10.4913	9.84097	0	13.0639	12.1337	0	13.1251	12.5	8.91183	10.2511	10.6074	11.6804	11.4722	11.5886	0	0	0	0	11.5847	12.3457	8.96064	0	11.5272	12.2684	0	10.8424	11.9341	0	11.6342	10.8679	10.0393	11.1424	0
SEC62	0	12.4904	11.7829	0	12.6529	11.7695	0	0	0	0	0	0	0	0	0	0	0	0	0	0	0	0	0	0	0	0	0	0	0	0	0	0	0	0	12.9614	12.1232	0	12.9226	12.0969	0	0	0	0	0	0	0	0	0	0
SEC63	0	10.5226	10.9224	0	11.3717	10.1919	0	0	0	0	0	0	0	0	0	0	0	0	0	0	0	0	0	0	0	0	0	13.0851	0	11.7951	0	0	0	0	11.2397	10.4384	0	12.1842	10.6656	0	0	0	0	0	0	0	0	0	0
SEH1L	0	11.5294	10.806	10.309	12.3092	11.0762	0	0	0	9.79198	0	9.52372	0	0	0	11.1043	11.4501	11.4575	0	0	0	0	0	0	11.8615	12.0156	11.3938	11.0898	12.5335	11.8983	0	0	0	0	12.4019	10.9738	11.3004	10.5058	10.8648	0	0	0	0	0	0	11.7752	10.9858	11.1981	0
SEL1L	0	10.1357	8.74626	0	9.83284	9.25075	0	0	0	0	0	0	0	0	0	0	0	0	0	0	0	0	0	0	0	0	0	0	0	0	0	0	0	0	10.9697	9.4665	0	10.0349	9.9843	0	0	0	0	0	0	0	0	0	0
SEPTIN2	0	10.2534	10.1508	0	10.9794	11.3707	0	0	0	9.85356	0	11.3968	0	0	0	0	0	0	0	10.987	9.74555	0	12.0346	11.5734	0	8.15188	9.0981	8.3856	10.2123	10.3781	0	0	0	0	12.9862	13.0568	0	13.0787	12.9747	11.3336	0	9.8425	10.4981	0	10.3704	0	0	0	0
SEPTIN9	0	10.7099	10.3994	0	11.8745	10.9797	0	0	0	10.358	0	11.3493	0	0	0	0	0	0	0	10.2714	9.86075	0	11.2248	11.15	0	9.93019	9.58895	10.124	10.7573	9.82894	0	0	0	0	13.2346	12.9108	9.45463	13.2599	13.6103	10.6225	0	10.4414	9.80147	0	9.94863	10.9738	9.88259	10.9512	10.62
SH3BGRL3	0	12.1789	12.296	0	0	0	10.7365	0	11.4009	13.9107	0	11.7063	0	12.4633	11.7488	0	15.2985	14.0244	0	13.6188	13.5521	0	11.9217	13.0045	0	13.5135	14.3715	11.8315	13.7409	13.0443	0	0	0	0	0	0	0	0	0	0	0	0	12.1953	0	12.3337	13.8369	8.84009	12.7743	13.8105
SHPK	0	12.5489	12.7148	0	0	0	15.3659	0	15.4532	16.0798	0	16.5006	0	0	0	0	0	0	0	14.2968	13.2103	0	14.2946	12.4344	0	0	0	12.1954	10.6223	11.5222	0	0	0	0	16.1173	16.198	0	15.1903	15.7146	0	0	0	16.5189	0	16.5564	10.3178	13.2909	12.6861	0
SIGMAR1	0	11.3107	8.33307	0	11.5846	10.1151	0	0	0	0	0	0	0	0	0	0	0	0	0	0	0	0	0	0	0	0	0	0	0	0	0	0	0	0	11.8713	10.5205	0	11.3674	10.9759	0	0	0	0	0	0	0	0	0	0
SKA1	0	12.0038	10.9786	0	12.3169	11.5551	0	0	0	11.0106	0	10.002	10.413	11.1899	10.1273	9.82699	10.6174	10.5563	0	9.2711	7.45677	0	9.54877	9.34893	0	10.4003	9.87938	9.32438	11.161	10.8256	0	0	0	0	12.4165	11.4619	9.97183	12.1483	11.732	10.4306	0	10.6583	0	0	0	10.4715	9.99223	10.2524	0
SLC12A2	0	9.1569	8.07984	0	9.90645	9.84856	0	0	0	0	0	0	0	0	0	0	0	0	0	0	0	5.97262	10.9452	10.9384	10.9069	9.69918	0	12.5893	0	12.2025	0	0	0	0	11.1811	10.9873	0	12.0046	8.79658	10.0853	0	10.2938	11.7086	0	9.57317	0	0	0	0
SLC16A1	0	13.0415	12.8204	0	13.0671	12.6513	10.9152	0	10.3277	12.5996	0	12.7261	0	0	0	0	0	0	10.1877	11.4805	10.9803	0	12.3072	11.9518	12.586	11.1383	0	12.7432	0	11.4077	0	0	0	0	13.6254	13.3545	0	13.5366	13.3962	12.8568	0	12.3299	12.4154	0	11.5252	0	0	0	0
SLC1A5	0	11.9305	11.1006	0	11.8582	12.1767	0	0	0	0	0	0	0	0	0	0	0	0	0	12.3833	11.6116	0	13.4206	12.6734	0	0	0	12.4018	8.63887	11.6695	0	0	0	0	13.1262	13.802	0	13.8317	13.413	13.0003	0	11.5219	12.8023	0	12.6369	0	0	0	0
SLC25A11	0	9.57299	9.29209	0	12.379	11.8044	9.97273	0	9.85284	13.4561	0	13.2668	0	0	0	0	0	0	0	0	0	0	10.3351	10.1182	0	0	0	15.0906	8.72649	14.0136	0	0	0	0	12.7442	12.3562	0	14.2101	14.2173	11.8016	0	11.0097	0	0	0	0	0	0	0
SLC35E1	0	10.107	9.64886	0	11.3475	9.84766	0	0	0	0	0	0	0	0	0	0	0	0	0	0	0	0	0	0	0	0	0	0	0	0	0	0	0	0	0	0	0	0	0	0	0	0	0	0	0	0	0	0	0
SLC39A14	0	12.7573	12.8118	0	11.756	12.8317	11.7976	0	10.2468	0	0	0	0	0	0	0	0	0	0	10.4459	10.4765	0	0	0	12.7274	11.6293	9.26336	12.6815	0	11.3019	0	0	0	0	11.8252	13.1125	10.5559	11.7557	10.6648	11.4	0	12.19	9.6987	0	11.2718	0	0	0	0
SLC4A1AP	0	8.99611	9.93765	9.65775	10.1087	9.30613	0	0	0	0	0	0	10.4636	12.9874	12.1822	11.7939	10.9847	11.4396	0	0	0	0	9.21994	8.19842	10.5439	11.8089	12.0514	0	13.2843	10.7471	0	0	0	0	10.4802	9.54296	0	11.0218	9.77066	6.98766	10.6175	9.32784	0	0	0	11.616	12.0242	11.2787	10.56
SLC9A3R1	0	9.68267	10.5663	0	8.53625	10.865	12.4892	0	11.2886	11.2657	0	11.4795	0	0	0	7.24783	11.2102	10.8653	0	13.7239	13.082	0	13.9309	14.4267	10.2353	10.402	10.7845	12.9218	9.14556	12.4066	0	0	0	0	8.85548	10.0272	0	11.4043	12.245	11.3788	0	10.3402	12.9884	0	13.046	10.0919	0	8.51469	0
SNRNP70	0	10.4144	10.3432	0	10.7755	9.93402	9.73696	12.4911	14.724	9.73786	0	9.99959	0	11.8176	11.9309	10.9217	9.28853	10.6163	0	10.1784	8.79129	0	0	0	9.82051	10.5961	11.0116	12.2867	12.2823	12.7035	0	0	0	0	10.646	10.6775	10.4556	9.86158	9.49561	0	0	0	0	0	0	9.67117	9.53811	10.5193	0
SNX2	0	12.1819	11.6935	10.3891	11.9079	11.5402	12.5604	0	11.8233	13.7478	0	12.7208	0	11.1192	10.9271	10.8673	11.2197	11.2113	0	13.3215	12.8076	0	13.5495	13.6443	12.7604	12.4984	11.5406	12.0789	10.2119	10.9727	0	0	0	0	13.0368	11.9527	10.4111	13.4092	12.2842	12.9089	0	11.2848	13.1323	0	12.3436	0	0	0	0
SORBS2	0	11.3889	11.3513	0	10.9159	10.8075	0	0	0	10.4538	0	10.4854	10.0217	10.5042	9.87793	0	0	0	11.1717	10.4514	10.8063	11.7544	9.93578	9.99915	10.2475	10.3185	9.6715	11.5591	11.0093	11.2251	0	0	0	0	11.5975	10.2936	9.68991	10.3025	9.9339	0	0	0	0	0	0	9.95056	9.50861	10.0128	0
SORBS3	0	11.8271	11.5719	11.5614	12.4569	11.1563	8.19638	12.7333	12.1221	0	13.2192	9.62479	10.4021	12.5272	11.9416	9.31209	7.8062	9.44247	0	11.5076	11.1752	10.6741	10.0168	11.3616	12.1505	11.3604	10.8925	11.5074	12.7427	12.1883	0	0	0	0	11.9348	10.7328	0	0	0	0	0	0	0	0	0	11.0423	9.83551	10.2987	10.8429
SORD	0	11.5939	11.6433	11.263	12.1746	11.9854	13.6721	0	12.5239	12.8799	0	13.2649	0	12.5774	11.9526	9.327	12.6602	11.7704	0	14.3098	13.8043	0	15.2419	14.6285	12.0169	12.1498	12.5287	11.4063	12.2537	12.0881	0	0	0	0	12.4887	12.5764	10.4468	12.7042	12.6245	14.3335	8.86406	13.5062	14.4085	10.5853	13.9903	12.0457	0	10.9987	12.2188
SPCS1	0	10.8045	11.2997	0	9.7449	11.3166	0	0	0	0	0	0	0	0	0	0	0	0	0	0	0	0	0	0	0	0	0	0	0	0	0	0	0	0	0	0	0	0	0	0	0	0	0	0	0	0	0	0	0
SPCS2	0	11.4992	10.9315	0	10.7038	10.8674	0	0	0	0	0	0	0	0	0	0	0	0	0	0	0	0	0	0	0	0	0	11.4179	0	10.5709	0	0	0	0	11.2757	11.7012	0	9.96707	10.8029	0	0	0	0	0	0	0	0	0	0
SPINT2	0	11.2635	10.3866	0	12.1087	11.0419	0	0	0	11.161	0	9.81245	0	0	0	0	0	0	0	0	0	0	0	0	0	0	0	10.4521	0	9.17282	0	0	0	0	12.1543	10.6721	0	12.5546	11.5884	0	0	0	0	0	0	0	0	0	0
SPTBN1	0	9.22652	9.08863	0	11.9842	11.7605	12.6301	0	12.2233	9.31719	0	12.1984	0	0	0	0	0	0	0	13.8353	12.789	0	13.3928	12.602	0	0	0	8.83968	10.4729	9.40204	0	0	0	0	11.7756	11.6255	0	11.5751	12.6024	12.7914	0	12.6879	12.875	0	12.3059	11.1349	10.3323	10.4489	0
SPTLC1	0	11.0433	12.1663	8.63822	12.757	12.0206	0	0	0	0	0	0	0	0	0	0	0	0	0	0	0	11.4805	9.71181	0	12.4981	11.7678	10.9007	12.199	10.3773	10.8968	0	0	0	0	12.7519	12.9569	10.6174	12.4586	11.8157	11.4382	0	10.4721	10.5526	0	10.452	0	0	0	0
SRP19	0	14.5076	13.9193	0	13.9955	13.6373	0	0	0	11.2705	0	11.0547	0	0	0	0	0	0	0	0	0	0	0	0	13.808	12.6439	6.644	13.3724	0	12.5363	0	0	0	0	13.3792	12.8634	9.61061	13.2235	12.5969	10.9335	0	9.33207	7.97908	0	8.91916	0	0	0	0
SRPK1	0	11.9211	11.2347	0	10.9771	11.0261	10.4802	0	9.45246	11.2036	0	10.0013	0	0	0	0	0	0	0	0	0	0	10.0831	9.63329	0	0	0	10.4388	7.39146	8.61618	0	0	0	0	0	0	0	0	0	0	0	0	0	0	0	0	0	0	0
SRRM1	0	12.8133	11.7063	0	11.0514	9.77435	0	0	0	10.3343	0	9.59176	0	10.4789	9.01342	0	0	0	0	0	0	10.1637	11.4021	9.37965	12.0614	11.1209	9.14617	9.74078	11.6805	10.0832	0	0	0	0	12.4024	11.7256	0	12.3402	11.8887	0	0	0	0	0	0	9.77279	9.46437	0	0
STAT3	0	10.7983	10.6688	0	10.8323	10.3268	0	0	0	11.6746	0	9.5396	0	9.90181	10.0005	0	0	0	0	0	0	0	11.1226	10.4652	9.73597	9.94558	10.0453	10.1577	10.2452	9.62499	0	0	0	0	11.6271	11.7429	0	10.3791	11.2188	10.7592	0	10.5817	11.1888	0	10.3122	0	0	0	0
STK24	0	13.2319	12.6069	0	12.3211	11.9832	10.0363	0	10.4201	11.2033	9.46695	10.7839	0	11.6743	11.6786	10.1343	11.6559	11.2168	0	10.3163	10.2268	0	9.50039	10.2777	11.3682	10.7784	10.4402	11.4386	10.9735	11.6424	0	0	0	0	12.643	12.1082	0	12.4298	12.2583	11.1906	0	11.1789	12.5169	0	11.131	10.8708	9.95305	10.583	10.1547
STK38L	0	11.587	11.0989	0	11.2446	10.585	0	0	0	0	0	0	10.8086	10.9758	11.5302	12.2167	10.2557	11.6485	0	0	0	0	11.4287	9.51898	9.92889	10.3315	10.7135	9.55647	11.3538	10.7611	0	0	0	0	11.405	11.0621	9.64211	8.54655	10.0974	0	0	0	0	0	0	0	11.4882	10.4382	0
STT3B	0	10.7042	9.85891	0	0	0	0	0	0	0	0	0	0	0	0	0	0	0	0	0	0	0	0	0	0	0	0	10.5974	0	10.4445	0	0	0	0	11.7208	10.2611	0	0	0	0	0	0	0	0	0	0	0	0	0
SUCLA2	0	10.5562	10.5272	10.169	10.7111	10.6974	12.3796	0	11.5225	0	0	0	0	0	0	0	0	0	0	11.7077	11.113	0	11.7911	12.7578	0	0	0	10.8315	8.73285	10.157	0	0	0	0	0	0	0	0	0	0	0	0	12.0615	0	12.3449	0	0	0	0
SUGT1	0	6.02235	9.54994	11.1549	7.35905	8.60533	12.3363	0	11.9645	11.6217	0	10.1864	0	10.6062	9.84985	9.33548	11.4403	10.8767	0	12.8136	12.4126	0	12.6863	14.0452	0	10.0508	10.4783	10.2086	8.85991	10.0949	0	0	0	0	8.86657	8.61372	0	9.73597	8.93266	10.1642	9.33416	10.6538	11.2839	8.67557	12.8344	11.0266	8.04734	9.91016	9.75711
SUPT6H	0	10.1442	9.27215	0	10.0856	10.3902	0	0	0	10.0785	0	10.1631	10.3309	9.31664	9.81984	0	0	0	0	0	0	0	0	0	0	0	0	0	0	0	0	0	0	0	9.61179	11.0446	0	0	0	0	0	0	0	0	0	0	0	0	0
SUPV3L1	0	8.8775	10.0301	0	9.66518	10.2036	0	0	0	0	0	0	10.4092	9.37683	9.46622	0	0	0	0	0	0	0	0	0	0	0	0	11.0438	10.34	10.5174	0	0	0	0	9.65115	9.94095	0	0	0	0	0	0	0	0	0	0	0	0	0
SYMPK	0	11.0932	9.92524	0	10.1601	9.22747	0	0	0	0	0	0	0	0	0	0	0	0	0	0	0	0	0	0	0	0	0	10.767	8.85443	10.6867	0	0	0	0	10.3821	10.0099	0	10.1714	9.80336	0	0	0	0	0	0	0	0	0	0
TALDO1	0	10.4324	10.5581	13.3854	12.0406	12.2805	14.987	0	14.4806	13.5543	0	13.5973	6.60265	11.9082	10.6425	11.0464	13.1807	11.9261	10.0896	14.8786	14.83	10.0551	15.2958	15.5456	11.2707	11.8128	12.1483	13.4598	10.0857	12.6386	0	0	0	0	12.2359	12.0815	0	12.7252	13.1638	14.1053	11.6219	14.3453	15.2819	11.7503	15.31	12.6003	8.66017	11.2051	11.9962
TATDN1	0	12.7269	12.2449	7.35385	11.6396	11.4525	0	0	0	0	0	0	0	0	0	0	0	0	0	0	0	0	0	0	0	0	0	0	0	0	0	0	0	0	12.0587	11.1379	0	11.7671	11.7408	0	0	0	0	0	0	0	0	0	0
TBC1D4	0	11.4798	11.4945	12.4889	10.5978	9.70912	0	0	0	0	0	0	0	0	0	0	0	0	0	0	0	10.7771	12.8475	12.0685	0	0	0	0	0	0	0	0	0	0	0	0	11.4872	0	10.9287	0	0	0	11.7195	11.7009	10.5712	0	0	0	11.671
TBCA	0	13.3412	12.8618	0	12.6697	12.4492	13.2094	0	11.9354	13.5997	0	13.4321	0	11.8082	11.033	9.31589	12.1593	10.0581	0	14.1021	13.8501	0	15.6205	15.0488	10.5251	10.1637	10.5563	13.0319	9.32871	12.0981	0	14.0863	14.3632	0	12.9096	12.2153	0	14.7869	14.6219	12.4097	0	11.63	13.8211	0	13.2464	9.83017	9.65362	9.9481	9.46909
TBL2	0	9.5162	9.27038	0	10.0138	9.54105	0	0	0	0	0	0	0	0	0	0	0	0	0	0	0	0	8.30449	8.35652	0	0	0	12.1327	0	9.806	0	0	0	0	11.5273	10.1024	0	12.2877	11.6204	0	0	0	0	0	0	0	0	0	0
TELO2	0	10.1344	9.60815	0	11.179	9.54006	0	0	0	0	0	0	0	0	0	0	0	0	0	0	0	0	0	0	0	0	0	0	0	0	0	0	0	0	11.6762	10.5512	0	11.4718	10.9501	0	0	0	0	0	0	0	0	0	0
TFAM	0	9.32667	9.05477	0	10.5609	11.2976	0	0	0	13.3179	0	12.7782	0	0	0	0	0	0	0	0	0	0	9.64316	9.00627	0	0	0	11.4091	0	9.77264	0	0	0	0	12.7834	13.0999	0	14.2146	14.5774	12.201	0	11.7181	10.7862	0	9.45988	0	0	0	0
TFIP11	0	13.1714	12.018	0	13.112	12.7874	0	0	0	7.93946	0	8.16292	0	11.6212	10.5584	0	0	0	7.92973	6.58553	7.3175	8.57459	7.68629	7.5181	9.75686	8.92142	8.34762	8.73456	12.2944	10.6907	0	0	0	0	12.4772	11.7217	8.87928	13.0124	12.2606	0	0	0	6.29339	0	6.91896	9.10394	8.39859	8.24703	0
TFRC	0	10.8702	9.91539	0	11.4268	11.522	0	0	0	9.46843	0	10.2472	0	0	0	0	0	0	0	9.87132	8.60223	0	11.065	10.4099	0	0	0	11.585	7.18814	9.84985	0	0	0	0	12.7447	12.4547	0	12.1517	13.1049	12.9806	0	11.9129	13.1515	0	12.4721	0	0	0	0
TGOLN2	0	10.2975	9.08059	0	0	0	0	0	0	0	0	0	0	0	0	0	0	0	0	0	0	0	0	0	0	0	0	0	0	0	0	0	0	0	10.0177	9.80476	0	0	0	0	0	0	0	0	0	0	0	0	0
THUMPD1	0	9.55481	9.02672	0	10.0923	9.01377	0	0	0	0	0	0	0	0	0	0	0	0	0	0	0	0	9.50891	10.4089	0	0	0	0	0	0	0	0	0	0	9.95415	9.25004	0	10.1397	9.73482	0	0	0	0	0	0	0	0	0	0
THYN1	0	10.0625	9.08252	0	11.056	9.58309	0	0	0	9.70119	0	8.23905	0	0	0	0	0	0	0	0	0	0	0	0	0	0	0	12.5745	9.18913	10.7724	0	0	0	0	9.45551	9.07133	0	10.2324	9.60638	0	0	0	0	0	0	0	0	0	0
TICAM2	0	11.5493	10.9881	0	11.474	11.2871	0	0	0	0	0	0	0	0	0	0	0	0	0	0	0	0	9.46708	9.02554	11.5549	8.73708	0	12.0424	0	11.0066	0	0	0	0	12.2674	11.8491	0	12.2366	11.6823	9.04225	0	8.90769	11.0427	0	9.96693	0	0	0	0
TIMM44	0	12.3192	12.6028	8.62721	10.3272	11.4459	0	0	0	11.2955	0	11.6434	11.851	9.5337	10.2847	10.9417	0	9.41256	0	10.1703	10.6645	0	11.9455	12.4699	12.1985	11.7813	10.1233	0	0	0	0	0	0	10.5763	11.4038	12.4229	10.7722	12.4994	11.3926	10.1115	0	11.8577	12.4497	0	12.3756	12.2443	10.7835	11.147	10.9423
TM9SF2	0	10.1874	9.78892	0	11.2551	10.2798	0	0	0	0	0	0	0	0	0	0	0	0	0	0	0	0	0	0	0	0	0	11.213	0	9.35241	0	0	0	0	11.0344	10.2849	0	11.2694	11.3942	9.98375	0	9.50437	0	0	0	0	0	0	0
TMCO1	0	12.5925	11.3723	0	12.912	12.222	0	0	0	10.9717	0	8.2489	0	0	0	0	0	0	0	0	0	8.44648	8.08265	8.37056	11.2681	9.51461	0	12.0235	0	10.9277	0	0	0	0	13.1295	12.2886	9.58916	13.0243	12.4245	10.9827	0	7.72236	0	0	0	0	0	0	0
TMED10	0	13.5627	13.4217	9.01638	13.78	13.7164	12.3291	0	10.7308	12.6386	0	12.4726	0	0	0	0	0	0	12.3549	10.5393	10.3234	12.6045	12.093	11.8352	13.1301	11.9602	9.25035	14.018	9.20753	13.0178	0	0	0	0	13.8614	13.6726	9.95594	13.3742	13.9805	13.486	0	11.9215	12.7911	0	12.3983	0	0	0	0
TMED2	0	9.5041	9.98406	0	9.50964	10.1714	9.99165	9.07208	9.86493	10.157	0	10.6123	0	0	0	0	0	0	0	9.20559	8.95204	0	10.3298	10.3804	12.1632	11.14	0	12.6854	6.32492	11.4211	0	0	0	0	11.0792	11.7649	0	11.2187	11.7959	10.6328	0	10.6526	11.9471	0	10.248	0	0	0	0
TMED9	0	10.2166	11.4832	0	10.4198	12.0613	0	0	0	11.855	0	9.6795	0	0	0	0	0	0	9.02567	8.92689	8.88801	0	0	0	12.4734	10.5801	0	12.9684	0	12.0449	0	0	0	0	10.6961	12.4708	0	0	0	10.2541	0	9.35945	8.44404	0	10.884	0	0	0	0
TMEM205	0	11.5279	10.2736	0	12.0118	11.1983	0	0	0	0	0	0	0	0	0	0	0	0	0	0	0	0	0	0	0	0	0	12.5401	0	10.3036	0	0	0	0	12.4745	12.2899	0	12.3	11.9541	0	0	0	0	0	0	0	0	0	0
TMEM245	0	10.1884	9.28849	0	0	0	0	0	0	0	0	0	0	0	0	0	0	0	0	0	0	0	0	0	0	0	0	11.2645	0	8.78218	0	0	0	0	10.2886	10.1789	0	10.8022	10.0673	0	0	0	0	0	0	0	0	0	0
TMEM41B	0	11.3887	9.81612	0	11.9319	10.5891	0	0	0	0	0	0	0	0	0	0	0	0	0	0	0	0	0	0	0	0	0	0	0	0	0	0	0	0	12.2822	11.0573	0	11.9871	10.9324	0	0	0	0	0	0	0	0	0	0
TMEM43	0	12.3832	11.2354	0	12.4477	11.7676	0	0	0	8.43425	0	8.43734	0	0	0	0	0	0	0	0	0	0	0	0	9.58887	8.88905	0	11.2256	0	10.2651	0	0	0	0	13.0245	12.0181	8.82286	12.2246	11.7132	0	0	0	0	0	0	0	0	0	0
TMSB10	0	13.6922	12.8945	12.2887	14.3871	14.2848	14.7381	10.4216	14.1027	14.4296	0	14.9475	12.5487	12.7324	12.7687	11.3949	14.6123	13.9242	0	15.4593	14.9716	13.7034	16.2003	15.8032	13.3527	13.4902	13.6525	13.3783	12.2825	13.3589	13.2176	13.2475	12.4537	0	13.8876	13.9846	0	15.0432	15.4718	14.2568	12.1734	13.7314	16.1022	13.3109	15.6658	12.7806	12.3813	12.8755	12.5231
TMSB4X	0	12.6439	12.1337	0	12.9617	12.7206	13.2288	0	12.5022	13.3882	0	13.3468	11.7325	11.8882	11.9503	0	13.2278	12.3933	0	13.842	13.2561	0	15.241	14.3908	12.5282	12.7117	12.4416	12.5202	0	12.3355	12.988	13.5491	9.13988	0	12.957	12.4252	0	13.9553	14.0579	12.5688	0	11.9984	14.4175	0	13.894	0	12.1441	11.7863	10.6484
TMX2	0	7.70138	12.0177	8.75951	9.32983	10.9655	0	0	0	0	0	0	0	0	0	7.75882	5.13484	7.21694	8.32486	7.43896	6.23326	0	0	0	11.6882	10.412	5.61231	12.5683	0	11.2112	0	0	0	0	10.619	11.2607	8.93864	10.1686	8.93648	0	0	0	0	0	0	0	0	0	0
TNFAIP1	0	9.77046	8.8653	0	10.218	9.61314	8.85919	11.4969	10.0581	0	0	0	10.7276	13.44	13.168	0	0	0	0	11.5986	10.0005	0	11.6684	10.2413	0	0	0	0	11.6249	8.60696	0	0	0	0	10.1705	9.81507	9.27156	9.64592	9.68172	9.80685	8.54365	9.5606	0	0	0	12.2908	10.1888	11.9173	12.3795
TNS3	0	9.382	9.7982	9.90654	10.4117	9.89766	0	0	0	11.4248	0	10.285	0	0	0	0	0	0	0	10.8154	10.3568	0	11.0276	11.3236	0	0	0	11.5267	0	11.0882	0	0	0	0	9.81802	8.99478	0	11.0685	10.0015	0	0	0	0	0	0	0	0	0	0
TPM1	0	9.57052	8.73584	0	8.76413	8.30766	13.8468	8.65112	13.1883	13.9472	9.5957	11.2287	8.6024	10.9863	10.5217	8.75064	11.7275	10.5221	0	12.7047	12.5013	0	13.1503	12.803	0	10.8027	11.458	9.15818	10.8474	9.51201	0	0	0	0	8.89786	8.05989	0	11.6728	10.4251	12.7846	0	12.4815	13.0381	8.30597	12.6654	10.1435	9.39135	9.88839	10.3663
TPR	0	10.4396	9.24222	0	9.44811	9.23453	0	0	0	8.72308	0	9.31604	0	0	0	0	0	0	0	12.7029	10.7787	0	11.335	10.0668	9.90135	10.7201	9.8632	9.28526	10.0642	9.38376	0	0	0	0	10.46	9.51142	0	10.6091	9.69659	0	0	0	0	0	0	0	0	0	0
TPRG1L	0	11.1924	11.164	0	10.2055	9.08545	0	0	0	0	0	0	0	0	0	0	0	0	0	0	0	0	0	0	0	0	0	0	0	0	0	0	0	0	11.9026	11.9081	0	0	0	0	0	0	0	0	0	0	0	0	0
TPT1	0	13.35	12.6907	10.4128	13.6167	13.3565	14.081	13.7681	13.697	14.6422	10.3608	14.1045	0	12.4348	11.7795	11.0042	13.4682	12.2778	0	13.6079	13.4788	0	14.388	14.1931	11.7465	11.9296	12.2553	15.997	12.5996	15.1477	0	0	0	0	13.4056	13.0894	0	14.9498	14.147	13.7571	0	13.3237	14.1014	0	14.1458	12.3101	12.7839	13.0852	13.0078
TRIM33	0	9.60641	10.4255	0	0	0	0	0	0	0	0	0	9.41285	10.1053	10.1929	9.81081	10.2765	10.2611	0	0	0	0	0	0	8.47622	9.84883	10.2241	0	0	0	0	0	0	0	0	0	0	0	0	0	0	0	0	0	0	9.82098	10.4939	9.80239	0
TRIM44	0	12.1222	11.2891	0	11.9404	10.548	0	0	0	0	0	0	0	0	0	0	0	0	0	0	0	0	0	0	0	0	0	11.8876	0	9.7138	0	0	0	0	11.7783	10.9295	0	10.6369	10.815	0	0	0	0	0	0	0	0	0	0
TRIP13	0	11.7515	10.0686	0	12.562	11.5525	0	0	0	11.9991	0	10.3537	0	0	0	0	0	0	0	10.1385	10.1004	0	10.5368	11.2443	12.703	10.6994	10.6572	10.5236	8.79614	11.0093	0	0	0	0	12.2068	10.2492	12.4318	13.0695	11.9815	10.932	0	10.8899	11.5574	0	9.74466	0	0	0	0
TRIR	0	12.4632	11.7357	0	12.6255	11.6691	0	0	0	9.88934	10.1342	9.93823	0	10.0619	9.90849	9.41367	9.68657	9.51425	0	0	0	0	0	0	10.7837	10.7164	11.0291	13.97	8.8712	12.9798	0	0	0	0	12.0834	11.1727	0	11.8637	11.122	0	0	0	0	0	0	8.94536	9.18321	9.04786	0
TRMT6	0	9.71193	10.3005	0	10.0279	10.0997	0	0	0	0	0	0	0	0	0	0	0	0	0	0	0	0	11.5363	10.8284	0	0	0	0	0	0	0	0	0	0	0	0	0	0	0	0	0	0	0	0	0	0	0	0	0
TRMT61A	0	10.2716	9.66099	0	10.0644	10.3369	0	0	0	0	0	0	0	0	0	0	0	0	0	10.2277	9.5645	0	11.055	10.5044	0	0	0	0	0	0	0	0	0	0	9.63644	10.2996	0	9.92049	10.0535	0	0	0	10.3869	0	9.74778	0	0	0	0
TSN	0	10.0547	9.79316	0	12.0069	10.5359	0	0	0	12.9394	0	12.6005	0	11.0586	10.4904	11.0146	12.0781	10.8771	0	12.3218	11.4606	0	13.4676	13.339	0	0	0	9.40491	9.48114	9.62297	0	0	0	0	11.4918	10.3344	0	12.3059	11.4508	12.4912	0	11.761	13.1957	0	12.5854	0	0	0	0
TTLL12	0	12.6088	11.7743	0	13.1187	12.2087	0	0	0	12.7468	0	12.0222	0	0	0	0	0	0	0	0	0	0	13.3188	12.1674	0	0	0	0	0	0	0	0	0	0	13.1691	12.4318	0	13.1136	12.5831	0	0	0	11.4692	0	12.0422	0	0	0	0
TUBAL3	0	12.9327	11.8321	0	0	0	0	0	0	0	0	0	0	0	0	0	0	0	0	0	0	0	0	0	0	0	0	12.4938	0	11.4594	0	0	0	0	0	0	0	0	0	0	0	0	0	0	0	0	0	0	0
UBA1	0	7.40841	5.30506	10.9279	8.67499	6.77068	12.5787	0	9.76383	11.0645	0	10.5188	0	0	0	6.20284	10.1502	7.21704	0	13.5062	12.8258	0	14.2666	14.2386	0	10.6502	10.0983	7.58873	0	6.05897	0	0	0	0	10.1998	9.91894	0	10.7406	11.5108	12.6281	0	11.6139	13.5993	0	13.0591	10.2922	10.3048	6.71672	0
UBA52	0	10.5198	9.04459	0	9.88867	9.57781	0	0	0	10.6992	0	10.7556	0	0	0	0	0	0	0	0	0	11.1626	9.41168	6.89166	0	0	0	0	0	0	0	0	0	0	11.148	11.0145	0	10.5216	10.4109	0	0	0	0	0	0	0	0	0	0
UBE2L3	0	10.4832	9.10736	9.21348	8.86791	11.0184	11.8216	0	9.33846	10.0348	0	11.1164	0	0	0	0	0	0	0	13.1408	12.4095	0	13.7393	13.7739	0	0	0	8.92126	8.47068	8.6458	0	0	0	0	9.14407	10.7937	0	10.5981	11.5159	10.8351	0	10.2441	13.4587	0	12.5745	0	0	0	0
UBE2M	0	10.7203	10.1618	11.6403	9.91176	10.4777	12.9736	10.2568	12.3099	13.1437	0	10.9253	0	0	0	8.43638	11.5882	9.71934	0	12.6656	12.2323	0	12.5476	12.9232	9.44282	10.3841	10.6844	13.6453	10.1246	12.8938	0	0	0	0	10.5262	9.01525	0	11.7899	10.8919	10.7075	10.5138	12.5458	12.191	9.61807	12.7905	10.9526	9.91107	10.7536	0
UBE2S	0	10.8242	10.3794	0	11.6356	11.2626	0	0	0	10.5255	0	10.5106	10.6775	8.9057	9.3293	10.7573	8.20804	10.5232	0	0	0	0	10.7443	9.94407	9.41095	8.83472	9.15401	9.94318	8.42861	9.55267	0	0	0	0	11.1124	10.2947	0	9.33935	10.6476	10.3081	0	10.1288	11.6971	0	10.563	0	12.0987	10.9189	0
UBXN4	0	12.163	11.6984	0	0	0	0	0	0	0	0	0	0	0	0	0	0	0	0	0	0	0	0	0	0	0	0	0	0	0	0	0	0	0	12.4053	12.0065	0	0	0	0	0	0	0	0	0	0	0	0	0
UCK2	0	9.1017	10.0494	0	0	0	0	0	0	0	0	0	0	0	0	9.69739	9.34074	9.09811	0	0	0	0	9.66012	10.3489	9.51783	9.39476	9.03067	10.7654	0	9.98142	0	0	0	0	0	0	0	0	0	10.7058	0	10.9075	11.785	0	11.7228	0	0	0	0
UFM1	0	10.2747	10.0386	0	0	0	0	0	0	0	0	0	0	0	0	0	0	0	0	10.6773	10.2939	0	11.3811	12.1027	0	0	0	12.1807	0	10.5119	0	0	0	0	9.06408	10.8393	0	0	0	0	0	0	0	0	0	0	0	0	0
UGDH	0	8.09945	9.0161	10.6862	7.70549	11.4083	13.7967	0	12.0642	10.8361	0	11.6752	0	0	0	7.86435	11.3507	10.6181	0	14.2649	13.487	0	13.9205	14.5625	5.9222	9.08055	10.6183	11.169	8.23642	10.8767	0	0	0	0	8.92818	7.41811	0	11.3678	10.272	12.1909	0	12.4031	13.0897	0	13.7347	0	0	0	0
UGT1A6	0	11.2103	11.2247	0	11.4266	11.2038	0	0	0	0	0	0	0	0	0	0	0	0	0	0	0	0	0	0	0	0	0	0	0	0	0	0	0	0	0	0	0	0	0	0	0	0	0	0	0	0	0	0	0
UMPS	0	10.0365	9.60819	0	9.84578	9.43628	0	0	0	0	0	0	0	0	0	0	0	0	0	0	0	0	9.58408	10.188	0	0	0	0	0	0	0	0	0	0	0	0	0	0	0	0	0	0	0	0	0	0	0	0	0
UNC45A	0	10.4255	9.82851	0	10.7023	10.2867	0	0	0	9.57786	0	11.2544	0	0	0	0	0	0	0	10.0208	9.51343	0	11.0367	10.8576	0	0	0	11.0409	10.277	10.6301	0	0	0	0	10.7841	11.113	9.53603	11.2627	10.617	9.4695	0	9.84533	10.6899	0	10.3397	0	0	0	0
UQCC1	0	11.2657	10.5288	0	12.3192	10.5232	0	0	0	0	0	0	0	0	0	0	0	0	0	0	0	0	0	0	0	0	0	11.2502	8.70463	11.0699	0	0	0	0	12.2978	11.0398	0	12.9191	12.5442	0	0	0	0	0	0	0	0	0	0
UQCC2	0	11.52	12.539	0	10.9746	11.2713	0	0	0	0	0	0	0	9.64371	9.18559	0	0	0	0	0	0	0	0	0	11.6934	10.649	9.47228	10.6339	9.76547	11.1081	0	0	0	0	10.5429	10.6869	0	12.2327	10.732	0	0	0	0	0	0	0	0	0	0
UQCRC1	0	9.08341	7.29415	0	12.0901	11.6938	11.0004	7.97493	9.77198	14.1797	0	13.1028	0	0	0	0	0	0	0	0	0	0	11.7038	10.6723	0	0	0	14.3125	6.65898	13.2247	0	0	0	0	12.8856	12.2384	7.98522	15.1389	14.6161	12.1783	0	11.269	11.7258	0	10.7652	0	0	0	0
UQCRC2	0	11.567	10.8479	0	13.389	13.1199	11.3477	8.36551	10.802	13.9678	0	13.7905	0	0	0	0	0	0	0	9.59565	8.13704	0	11.6101	11.2505	9.65714	9.11982	8.8515	15.5426	10.3343	14.5001	0	10.1897	9.5305	0	13.4976	13.6693	0	14.4604	14.4375	12.7177	0	11.7708	11.9551	0	11.3226	0	0	0	0
UXS1	0	8.20633	8.76127	0	0	0	0	0	0	0	0	0	0	0	0	0	0	0	0	0	0	0	0	0	10.0992	7.36475	0	0	0	0	0	0	0	0	7.13709	8.31915	0	8.25524	7.8008	0	0	0	0	0	0	0	0	0	0
VAPA	0	12.4608	10.6137	0	12.7189	12.4873	0	0	0	8.91739	0	7.22323	0	9.12297	9.53412	0	0	0	0	0	0	0	0	0	11.1565	10.3878	8.20892	11.9085	9.0838	10.8313	0	0	0	0	13.4303	11.6598	8.85571	13.8693	13.0243	0	0	0	0	0	0	8.87181	9.98911	9.92515	0
VAT1	0	10.8912	12.0439	10.9075	11.6088	11.8803	13.2184	0	11.7249	12.4363	0	12.8513	0	10.4034	9.60099	0	12.1839	10.7567	12.3365	12.8932	11.9285	11.5879	12.9141	12.6869	12.9185	11.7695	11.0831	13.383	10.1275	12.5596	0	0	0	0	12.1109	12.331	11.445	12.4598	12.7339	13.0898	0	12.4868	13.2465	0	12.6364	11.2307	8.58841	10.568	0
VDAC1	0	12.8938	12.6738	0	14.3013	14.2018	13.2614	13.9661	14.1304	15.1146	0	15.7911	0	0	0	0	0	0	12.0429	12.5302	12.1931	11.4144	11.9734	12.6682	12.4397	11.6485	11.0075	17.4388	12.4967	16.5453	12.7473	13.0112	12.4526	0	15.6656	16.1829	0	16.2066	16.2417	15.8555	0	14.8995	13.8433	10.5164	14.0678	10.1339	11.7972	10.7895	0
VDAC2	0	10.8716	11.3837	0	12.8116	12.7757	11.3203	11.6418	11.1665	14.2516	0	14.5039	0	0	0	0	0	0	9.48378	8.89898	8.6697	0	10.8868	10.9293	9.89058	10.1635	9.16816	15.8303	11.0236	14.6713	10.8401	11.5983	11.6654	0	14.7082	14.8042	0	15.389	15.1503	13.6218	0	13.2597	12.0221	0	12.2389	8.24736	11.3505	9.14179	0
VKORC1	0	11.0962	11.8462	0	11.8085	11.1445	0	0	0	0	0	0	0	0	0	0	0	0	0	0	0	0	0	0	11.4867	10.1573	0	12.2333	0	11.4189	0	0	0	0	11.7576	11.5075	0	0	0	0	0	0	0	0	0	0	0	0	0
VTI1B	0	11.5574	10.8784	0	10.9192	10.6704	0	0	0	10.1016	0	10.7574	0	0	0	0	0	0	0	0	0	0	11.3696	10.8565	0	0	0	0	0	0	0	0	0	0	10.7531	10.825	0	9.42839	10.6969	0	0	0	0	0	0	0	0	0	0
WARS1	0	10.754	9.81222	9.66014	10.5903	10.81	0	0	0	10.0865	0	10.3903	0	11.029	10.4534	9.49233	10.8223	10.4865	0	11.4843	10.7605	0	12.5524	12.0759	0	0	0	0	10.3816	10.4529	0	0	0	0	11.4988	11.0681	0	11.353	11.4385	11.9485	0	10.8304	12.0893	0	11.3763	0	0	0	0
WASL	0	11.1344	10.8326	0	8.72615	9.86213	0	0	0	0	0	0	0	0	0	0	0	0	0	0	0	0	0	0	0	0	0	0	0	0	0	0	0	0	10.2457	11.1248	9.18364	9.09416	9.79808	0	0	0	0	0	0	0	0	0	0
WDR43	0	9.42283	10.2283	0	0	0	0	0	0	0	0	0	0	0	0	0	0	0	0	0	0	0	0	0	0	0	0	11.107	8.95794	10.7618	0	0	0	0	0	0	0	0	0	0	0	0	0	0	0	0	0	0	0
XPO1	0	13.9252	13.1522	9.38269	13.7752	13.3887	12.517	0	10.193	11.9264	0	11.7538	0	0	0	7.90929	11.0881	9.7389	0	12.208	11.7975	0	13.3087	12.9072	12.8919	12.1265	10.7981	13.1315	8.80219	12.3867	0	0	0	0	14.1518	13.8104	10.4407	13.5965	13.6474	13.0002	0	12.3325	13.2768	0	12.463	0	0	0	0
XPO5	0	12.7775	11.6205	0	12.5183	10.9402	0	0	0	10.1969	12.3184	11.8661	0	0	0	0	0	0	0	10.4165	10.4298	0	12.1993	11.5187	10.9948	10.5788	9.80233	12.2549	9.59023	11.3867	0	0	0	0	13.2534	13.1278	0	13.4773	12.6948	10.4742	0	10.0935	11.2091	0	9.39508	0	0	0	0
XRN2	0	10.977	9.62511	9.2567	11.4844	10.8035	0	0	0	0	0	0	11.327	8.96099	9.97255	10.2043	9.97527	10.346	10.1353	9.11725	9.70839	0	8.20242	9.75202	10.2366	10.6335	10.2237	9.24554	9.24417	9.14937	0	11.5031	10.382	0	10.9026	9.65097	9.73677	11.4787	10.9435	0	9.817	9.6393	0	0	0	10.2382	10.2319	10.4166	0
XYLB	0	10.9814	10.8675	0	10.6627	10.9616	0	0	0	0	0	0	0	0	0	0	0	0	0	0	0	0	10.8098	10.9558	0	0	0	0	0	0	0	0	0	0	10.8952	10.8621	0	10.5467	10.6366	0	0	0	0	0	0	0	0	0	0
YBX3	0	12.7816	12.3896	0	13.0848	12.6155	11.9804	0	11.1784	12.2583	0	12.0478	9.6319	11.962	11.6893	11.4565	12.1172	11.352	0	11.1723	10.8841	0	11.6094	10.7723	9.76235	11.063	11.4792	11.214	11.8806	11.7134	0	0	0	0	12.5541	12.1082	0	11.8474	11.563	11.2531	0	10.6826	11.4498	0	11.3756	10.2491	11.0078	10.8945	0
YTHDF2	0	12.3608	11.3895	0	11.7897	11.3817	10.5653	0	10.7348	11.1467	0	10.4902	0	0	0	0	0	0	0	0	0	0	9.40822	8.84779	0	0	0	9.20373	9.56323	9.80152	0	0	0	0	12.2073	11.3528	0	12.1154	12.006	10.7497	0	11.2652	10.0205	0	11.0369	0	0	0	0
YTHDF3	0	10.8995	10.9871	0	11.3615	11.0731	0	0	0	0	0	0	0	0	0	9.35318	10.4534	0	0	0	0	0	0	0	11.0681	10.5188	10.1712	10.9728	10.4021	11.3365	0	0	0	0	11.0389	10.3828	0	10.9138	10.333	0	0	0	0	0	0	0	0	0	0
ZC3HAV1	0	11.098	9.89881	0	11.3032	10.2353	0	0	0	11.7392	0	8.817	0	0	0	0	0	0	0	0	0	8.84276	10.7179	8.17582	0	0	0	9.47987	8.03012	9.05764	0	0	0	0	11.2032	10.0596	9.18671	11.1203	11.2246	0	0	0	0	0	0	0	0	0	0
ZCCHC10	0	10.4163	10.5928	0	0	0	0	0	0	0	0	0	0	0	0	0	0	0	0	0	0	0	0	0	0	0	0	0	0	0	0	0	0	0	0	0	0	0	0	0	0	0	0	0	0	0	0	0	0
ZFPL1	0	11.1877	10.024	11.1589	10.4458	9.90327	0	0	0	0	0	0	0	0	0	0	0	0	0	0	0	0	0	0	0	0	0	0	0	0	0	0	0	0	11.7618	10.8892	0	11.6412	11.1345	0	0	0	0	0	0	0	0	0	0
ZNF622	0	9.80868	10.642	0	11.3628	11.1257	0	0	0	11.9227	0	11.1966	0	0	0	0	0	0	0	0	0	0	0	0	0	0	0	10.8225	0	10.8398	0	0	0	0	9.79774	8.52941	0	0	0	0	0	0	10.6405	0	10.3982	0	0	0	0
AAAS	0	0	0	12.5308	0	13.0821	14.6845	0	17.1416	0	0	0	13.5992	14.4791	14.6453	12.2938	16.2808	15.454	0	14.7303	16.581	0	0	0	13.0406	15.3527	15.8633	14.0354	14.7956	14.2467	0	0	0	0	0	0	0	0	0	10.8785	12.6076	14.5142	0	0	0	0	0	0	15.6987
AAK1	0	0	0	9.98911	9.5611	9.98106	0	0	0	0	0	0	0	0	0	0	0	0	0	0	0	0	0	0	0	0	0	10.4021	10.3929	9.97199	0	0	0	0	0	0	0	8.79276	9.78065	9.67336	0	9.76271	9.7602	0	9.10203	0	0	0	0
ABRACL	0	0	0	7.58541	10.3499	8.7144	0	0	0	11.7147	0	9.07692	0	0	0	0	0	0	0	0	0	0	12.7175	12.0856	0	0	0	0	0	0	0	0	0	0	9.81206	7.39365	0	11.9923	11.1012	0	0	0	11.1965	0	9.97391	0	0	0	0
ACAD8	0	0	0	9.26486	9.18537	10.0542	11.4897	0	10.4407	0	0	0	0	10.6419	9.84361	0	0	0	0	0	0	0	10.6474	10.3976	10.468	10.4738	10.9793	9.96047	11.185	10.5434	0	0	0	0	0	0	9.93334	9.41403	9.8784	11.25	0	11.8173	11.5827	0	11.6098	0	0	0	0
ACAP2	0	0	0	15.4414	16.0259	15.7493	0	0	0	0	0	0	16.3395	15.6974	15.7871	15.7254	15.9852	15.7949	0	0	0	0	0	0	16.0685	15.9648	15.9142	0	0	0	0	0	0	15.7431	15.7342	15.8944	16.3489	15.5219	15.4547	0	0	0	0	0	0	0	0	0	15.97
ACO2	0	0	0	10.8305	9.94552	9.25365	0	0	0	11.1863	0	11.2076	0	9.18114	10.1064	10.3619	9.22122	10.7499	0	11.9791	9.44231	0	12.6551	13.0004	11.5604	11.7105	10.3181	0	0	0	0	0	0	0	11.5356	9.67708	11.5464	11.9998	11.2993	12.1898	0	11.082	13.4015	0	12.264	10.2141	9.08231	7.24375	0
ACP1	0	0	0	11.2743	9.97843	7.67278	0	0	0	11.0975	0	10.7172	0	0	0	0	0	0	0	12.9005	11.8406	0	12.8731	13.4166	0	0	0	0	0	0	0	0	0	0	0	0	0	12.2299	10.0534	10.1789	0	12.2913	11.4389	0	12.1582	0	0	0	0
ADD1	0	0	0	10.4008	10.1662	10.9737	0	0	0	12.0038	0	12.057	0	0	0	0	0	0	0	12.4479	11.8752	0	13.1904	12.3228	0	0	0	12.1918	0	11.1839	0	0	0	0	11.1816	9.94207	0	12.3021	11.7088	0	0	0	11.3655	0	10.7967	0	0	0	0
ALDH7A1	0	0	0	10.289	9.60661	8.2273	13.0977	0	12.0135	11.8371	0	9.51152	0	0	0	8.82257	11.0647	9.72857	0	13.2764	13.1474	0	14.0974	13.5868	0	8.94276	9.35232	9.83881	7.75556	9.32326	0	0	0	0	0	0	0	11.1022	10.9092	12.6024	0	11.9854	12.1535	0	13.5044	0	0	0	0
API5	0	0	0	12.9848	13.9129	13.6948	0	0	0	0	0	0	0	0	0	13.1539	13.6115	13.3369	0	0	0	0	0	0	13.9931	13.6261	13.5797	15.2279	13.2449	14.6454	0	0	0	0	0	0	12.9185	13.6862	13.1649	0	0	0	0	0	0	0	0	0	0
ARPC4	0	0	0	14.3765	14.9103	14.3734	14.3934	14.5455	14.2764	17.1545	14.8742	16.3992	15.0018	14.9369	14.8167	14.8735	15.8069	15.353	13.6754	15.2707	15.2183	13.2898	15.3752	14.381	13.4504	15.0748	15.52	13.4422	15.485	14.9781	15.433	15.464	15.6701	14.4741	15.9207	14.4686	14.6888	15.3958	14.8015	15.2805	15.2963	14.8866	15.7338	15.0495	15.4729	15.4363	15.0778	15.1116	15.6028
ATAD3A	0	0	0	10.1969	9.63935	8.73486	11.4706	0	11.0524	11.3486	0	11.1205	9.81591	10.4767	10.4357	10.3134	10.8255	10.7512	0	11.9666	11.1388	0	0	0	9.7827	10.7189	7.854	15.7433	10.7437	12.3394	0	0	0	0	13.551	11.8263	9.34651	14.7591	14.0225	9.38031	0	13.0011	10.6799	9.25314	11.7116	0	0	0	0
ATP1A1	0	0	0	12.6017	14.6854	14.2693	0	0	0	0	0	0	0	0	0	0	0	0	13.5798	14.8433	14.6675	14.1594	15.0347	14.7986	0	0	0	15.5091	10.8671	14.3108	0	0	0	10.8414	15.0927	14.9234	12.1356	14.9102	15.3316	15.2428	8.19805	14.7758	14.9132	9.12473	14.3733	0	0	0	0
ATP5PD	0	0	0	7.22516	13.1857	12.4226	8.72739	8.95271	9.43088	14.1973	0	14.1295	0	10.0294	9.58893	0	0	0	0	9.71843	9.80723	0	11.7199	10.8237	8.01984	7.17392	6.86078	16.9381	9.2938	15.4834	0	0	0	0	13.7252	12.3697	7.74099	15.5734	15.8821	11.947	0	9.52945	9.75595	0	8.29696	9.37136	9.53431	9.07307	8.172
ATP6V1C1	0	0	0	11.4546	9.92714	8.84477	0	0	0	12.7396	0	11.914	0	0	0	0	0	0	0	0	0	0	0	0	0	0	0	0	0	0	0	0	0	0	11.1421	9.71079	0	10.5358	11.1416	0	0	0	0	0	0	0	0	0	0
BCAP31	0	0	0	9.66584	13.7665	13.6178	0	0	0	13.6887	0	12.8546	0	0	0	0	0	0	0	0	0	0	12.3561	12.4023	0	0	0	0	0	0	0	0	0	11.4663	13.9314	13.9228	10.9645	14.1929	13.621	0	0	0	0	0	0	0	0	0	0
CFL1	0	0	0	17.3972	16.3032	16.6693	17.7676	16.8457	17.1126	17.4815	16.9113	18.119	0	0	0	15.9454	17.6395	16.7789	15.4227	18.1202	17.852	15.801	18.4808	18.088	15.4821	16.65	17.2016	15.0499	16.9947	16.4108	0	0	0	0	0	0	0	0	0	17.823	17.4913	17.3633	17.9906	16.3229	17.8688	17.3722	15.0427	16.4518	17.2585
COTL1	0	0	0	11.8904	10.482	10.0589	12.4256	0	11.3423	14.2874	0	13.7503	0	0	0	0	10.7716	10.0855	0	11.2064	10.959	0	12.0007	11.9183	12.0334	10.2624	11.1479	0	0	0	0	0	0	0	10.4367	9.70354	0	12.1943	11.0664	11.3843	0	10.7988	14.2875	0	12.7255	0	0	0	0
CTNNA2	0	0	0	10.0025	11.9209	10.4422	0	0	0	0	0	0	0	0	0	0	0	0	0	11.3738	11.9632	0	12.0366	10.8429	0	0	0	9.62521	10.4355	11.3081	0	0	0	0	0	0	0	0	0	10.2869	0	10.3221	0	0	0	0	0	0	0
DCDC2	0	0	0	11.0693	11.0395	9.74814	0	0	0	11.8427	0	11.2283	11.3029	11.2086	11.7664	11.336	10.5724	11.2595	0	0	0	0	0	0	11.6223	11.124	11.7429	12.7415	11.3066	11.7477	0	0	0	11.5963	12.0402	10.9561	11.5185	11.516	11.9178	0	0	0	0	0	0	11.7693	11.6874	11.4625	10.1833
FDPS	0	0	0	8.86118	9.03346	11.4012	13.118	0	12.6047	12.0915	0	9.85793	0	0	0	8.42011	10.1806	8.99421	0	13.4699	13.076	0	14.1095	14.5145	0	0	0	9.99422	6.84172	8.56131	0	0	0	0	10.5484	11.864	0	11.7548	10.3421	12.4153	7.41329	12.8899	13.9313	8.9441	13.0145	9.44189	0	8.16093	0
GDI2	0	0	0	14.6631	14.5738	14.5414	15.6451	12.8186	15.0114	15.6647	12.8513	15.2944	0	0	0	0	0	0	13.8207	15.6953	15.6163	13.2996	16.3847	16.0661	0	0	0	0	0	0	0	0	0	0	0	0	0	0	0	15.3553	14.1852	14.936	15.7593	13.4056	15.6257	0	0	0	0
HADH	0	0	0	11.8662	14.5836	14.8293	0	0	0	0	0	0	0	0	0	0	0	0	0	0	0	0	0	0	0	0	0	0	0	0	0	0	0	0	0	0	0	0	0	0	0	0	0	0	0	0	0	0	0
HDHD5	0	0	0	12.8923	9.73701	10.1844	12.1176	13.4206	11.8233	12.3203	13.3495	11.6593	13.3127	10.5998	12.389	12.8033	13.3936	13.2183	0	12.372	11.356	0	13.275	12.4245	12.7561	13.0471	13.3176	10.3926	12.5177	10.8315	0	0	0	0	10.8738	10.9049	0	11.3114	11.3123	12.6242	13.0487	12.1032	13.3134	0	11.5602	0	0	0	13.3367
HSD17B10	0	0	0	13.1858	15.3541	14.6017	0	0	0	0	0	0	0	0	0	0	0	0	0	0	0	0	0	0	0	0	0	0	0	0	0	0	0	0	0	0	0	0	0	0	0	0	0	0	0	0	0	0	0
HSP90B1	0	0	0	15.0537	15.2504	15.0607	0	0	0	0	0	0	0	0	0	0	0	0	14.1561	15.6329	15.3057	14.2001	16.2436	16.0023	0	0	0	0	0	0	0	0	0	0	0	0	0	0	0	15.4426	14.9432	14.9593	15.846	14.623	15.6794	0	0	0	0
HSPA5	0	0	0	15.5862	16.0237	15.901	16.2869	15.2549	15.8576	16.5395	15.6761	16.3287	0	0	0	15.6464	16.1286	15.9254	14.7332	16.3828	16.0984	14.7697	16.824	16.6649	15.195	15.7062	15.9938	0	0	0	0	0	0	0	0	0	14.5229	16.4783	16.1597	16.5231	15.7406	16.2599	16.8292	15.5752	16.5743	16.1819	15.282	15.8545	15.945
HSPA8	0	0	0	16.5688	16.9444	16.6789	17.2765	15.7757	16.9318	17.0546	15.9352	16.8363	0	0	0	16.2758	16.8272	16.6387	15.9688	17.1113	16.9932	16.0919	17.1854	17.257	16.1874	16.4564	16.5488	0	0	0	0	0	0	0	0	0	15.99	17.6063	16.6509	17.3868	16.4327	17.2398	17.3983	16.3262	17.4441	0	0	0	0
HSPD1	0	0	0	15.8666	15.5524	15.6141	16.0359	14.8191	15.398	16.0396	14.6407	15.7296	0	0	0	0	0	0	0	0	0	15.3325	16.1924	15.9549	0	0	0	0	0	0	0	0	0	0	0	0	13.3692	16.7801	16.8753	16.5698	15.8373	16.0152	16.7616	14.4089	16.3681	0	0	0	0
IDI1	0	0	0	7.77498	8.70556	9.513	12.2209	0	9.88988	10.9291	0	11.4506	0	9.12854	6.71181	0	0	0	0	12.4884	11.5648	0	13.9939	13.8342	0	0	0	0	0	0	0	0	0	0	9.18532	9.26586	0	11.3405	10.4053	11.3108	0	10.7997	13.2381	0	12.3638	0	0	0	0
IQGAP2	0	0	0	13.513	12.7915	12.7472	16.6276	13.4799	15.9753	16.0021	12.9874	16.2681	13.0846	13.7669	13.6057	12.7255	12.9461	12.9208	12.4429	14.6882	14.3841	13.3672	14.2878	14.3155	14.5209	14.1997	13.7252	13.5578	13.9476	13.8813	0	0	0	14.289	12.6947	12.7249	14.7225	12.2166	13.0439	16.226	10.2938	15.8904	16.0199	14.0568	16.0402	13.0509	12.6666	12.8586	13.1107
JUP	0	0	0	7.5725	13.1432	12.8215	0	0	0	0	0	0	0	0	0	0	0	0	0	13.8295	13.2833	0	13.3176	13.7491	0	0	0	15.9546	12.0925	14.4958	0	0	0	8.98965	13.5181	13.3917	8.42492	14.0325	13.8087	12.1656	0	12.1795	11.8972	0	11.6633	11.7947	12.5158	11.9668	0
KIAA1217	0	0	0	10.1248	10.3982	10.1579	0	0	0	11.8877	0	10.1629	0	11.1216	10.6393	9.98805	11.0296	10.3615	0	10.6616	9.66214	0	11.762	9.84	0	0	0	11.6055	10.1017	10.5266	0	0	0	0	11.7857	9.60467	9.89028	12.7759	11.385	11.3307	0	10.4377	10.45	0	10.7541	0	0	0	0
MRPL44	0	0	0	9.26501	9.64705	7.40914	0	0	0	0	0	0	0	0	0	0	0	0	0	0	0	0	0	0	0	0	0	11.0999	0	10.2423	0	0	0	0	11.2376	9.83812	0	12.8666	12.3754	0	0	0	0	0	0	0	0	0	0
NDUFS1	0	0	0	10.0314	9.64113	8.95696	0	0	0	10.9691	0	9.73884	0	0	0	0	0	0	0	0	0	0	7.62958	7.34283	0	0	0	14.284	0	11.2254	0	0	0	0	10.8255	10.8057	0	11.4111	12.9768	0	0	0	0	0	0	0	0	0	0
NPLOC4	0	0	0	10.2775	11.6781	10.6258	0	0	0	0	0	0	0	11.8007	11.432	9.38435	11.3856	10.3505	0	10.4814	8.9197	0	12.12	10.6547	0	0	0	9.46065	11.6395	10.9943	0	0	0	0	11.8048	10.5322	0	11.8843	11.8826	11.0458	0	10.3006	10.806	0	10.3854	11.6702	9.57875	10.4141	0
PGAM5	0	0	0	9.43819	10.6581	9.51735	0	0	0	11.9681	0	11.8674	0	0	0	0	0	0	0	0	0	0	0	0	0	0	0	12.6181	7.43555	11.2852	0	0	0	0	12.0495	11.1764	0	13.1703	12.4337	9.04441	0	9.46402	0	0	0	0	0	0	0
PICALM	0	0	0	12.4763	13.8307	13.5207	0	0	0	0	0	0	0	0	0	0	0	0	0	0	0	0	0	0	0	0	0	13.8482	12.603	13.4415	0	0	0	12.5636	13.9342	13.2209	12.8996	13.3907	13.4179	0	0	0	0	0	0	0	0	0	0
PLIN3	0	0	0	9.11789	8.23857	8.0119	13.2617	0	11.1615	10.8805	0	10.5116	0	0	0	0	9.33272	8.34844	0	13.4051	12.703	0	13.4845	14.0914	7.4949	7.30278	9.95292	10.2347	0	9.07442	0	0	0	0	10.6421	9.42826	0	10.9149	11.869	11.8633	0	11.5388	13.2988	0	13.0634	0	0	0	0
POLR1C	0	0	0	9.85891	10.6628	9.31051	0	0	0	10.5151	0	10.6543	0	0	0	10.1425	10.3988	10.3159	0	0	0	0	11.3292	10.6972	10.9653	10.6092	11.461	0	10.9689	9.97809	0	0	0	0	0	0	0	10.6432	10.3744	0	0	0	0	0	0	0	0	0	0
PPP1R9A	0	0	0	12.3739	0	11.9029	0	0	0	12.582	12.79	12.6555	0	0	0	0	0	0	0	11.9938	10.2	0	0	0	13.1004	12.2271	10.957	0	0	0	0	0	0	13.0792	11.9058	13.1301	11.6086	12.6856	13.0937	11.4329	12.4496	0	0	0	0	0	0	0	0
PRDX5	0	0	0	13.0754	0	10.6935	13.1484	0	12.3103	0	0	0	0	10.3962	10.5881	10.6258	13.3288	12.812	0	13.414	13.9014	0	9.04731	14.208	11.1056	11.1261	11.9981	12.8429	9.98377	11.7963	0	0	0	0	0	0	0	0	0	10.3949	11.4528	10.7144	9.52518	0	13.6495	12.8685	9.94078	11.5925	12.0234
S100A10	0	0	0	11.9664	15.5088	15.0662	0	0	0	0	0	0	0	0	0	0	0	0	0	15.2105	14.8304	0	15.4558	14.1919	0	0	0	0	0	0	0	0	0	9.64066	15.2594	14.6169	11.1453	17.0248	16.5902	0	0	0	0	0	0	0	0	0	0
S100A11	0	0	0	11.5192	10.5244	10.3851	0	0	0	0	0	0	0	0	0	0	0	0	0	11.4517	11.931	0	11.6944	12.1854	0	0	0	0	0	0	0	0	0	0	11.0902	10.575	0	11.2237	11.5712	0	0	0	10.1676	0	10.4946	0	0	0	0
S100A9	0	0	0	8.14234	11.9164	11.8369	0	0	0	0	0	0	0	0	0	0	0	0	0	0	0	0	0	0	0	0	0	0	0	0	0	0	0	0	0	0	0	0	0	0	0	0	0	0	0	0	0	0	0
SEPHS1	0	0	0	12.536	11.1525	10.5569	11.7534	10.5898	11.2926	11.644	11.0938	11.0409	0	13.5308	12.6043	0	13.28	11.7141	0	12.55	12.348	0	12.6335	12.71	10.6231	12.4031	13.6102	11.7844	13.3429	12.9001	0	0	0	0	0	0	11.8625	10.8364	10.1491	0	0	0	12.3521	11.2002	11.9918	12.9282	0	11.2094	12.976
SEPTIN7	0	0	0	9.33793	11.4551	10.5738	0	0	0	12.4433	0	11.0819	0	0	0	0	0	0	0	0	0	0	10.8016	11.1713	0	0	0	0	11.4088	10.7696	0	0	0	0	13.5671	12.8763	0	14.706	14.1058	0	0	0	0	0	0	0	0	0	0
SERPINB1	0	0	0	8.61442	8.7881	9.53041	12.5361	0	9.94618	8.60394	0	10.4538	0	0	0	0	0	0	0	12.2562	11.4094	0	13.0703	13.2018	0	0	0	10.2041	6.70584	9.38474	0	0	0	0	9.70756	8.92852	0	9.76313	10.6229	11.958	0	11.52	13.082	0	12.6391	0	0	0	0
SERPINH1	0	0	0	15.7316	15.608	15.6997	0	0	0	15.9161	14.8274	15.7595	0	0	0	0	0	0	14.7319	15.9024	15.7037	15.01	16.3669	16.0173	0	0	0	0	0	0	0	0	0	15.3363	16.1193	15.9233	15.4599	15.538	16.1314	16.0382	14.5054	15.5616	16.276	14.4271	15.9163	0	0	0	0
SHMT1	0	0	0	12.1713	12.7408	12.3746	0	0	0	0	0	0	0	0	0	0	0	0	0	0	0	0	0	0	0	0	0	0	0	0	0	0	0	0	0	0	0	0	0	0	0	0	0	0	0	0	0	0	0
SHMT2	0	0	0	14.1037	15.339	15.4554	0	0	0	0	0	0	0	0	0	0	0	0	0	0	0	0	0	0	0	0	0	0	0	0	0	0	0	0	0	0	0	0	0	0	0	0	0	0	0	0	0	0	0
SNRPB	0	0	0	17.2164	17.7444	17.2965	0	0	0	16.9153	17.5356	16.6829	17.7039	17.2785	17.2137	17.5664	17.5354	17.2545	0	0	0	0	0	0	0	0	0	0	0	0	18.2304	17.6938	17.6314	17.7458	17.6234	16.7961	17.6675	17.3272	17.5375	0	0	0	0	0	0	0	0	0	17.2991
SPEF2	0	0	0	10.282	9.87578	10.9936	0	0	0	0	0	0	0	0	0	11.298	12.0294	12.0394	0	0	0	0	0	0	0	0	0	0	0	0	0	0	0	0	0	0	0	10.7834	10.9725	0	0	0	10.6527	0	10.0337	0	0	0	0
TIMM50	0	0	0	8.48297	9.60011	8.91067	0	0	0	11.2899	0	10.9229	0	0	0	0	0	0	0	0	0	0	0	0	0	0	0	12.5965	9.09395	11.6218	0	0	0	0	10.9415	9.84175	0	13.013	12.6966	0	0	0	0	0	0	0	0	0	0
TPX2	0	0	0	7.55635	7.09064	6.60219	0	0	0	0	0	0	0	0	0	0	0	0	0	0	0	0	0	0	7.84853	9.05783	10.8979	15.0838	10.6182	13.531	0	0	0	6.84361	8.1447	6.46686	8.83477	6.95965	6.19612	0	0	0	0	0	0	0	0	0	0
USP9X	0	0	0	10.5323	12.1255	10.9957	0	0	0	0	0	0	11.0288	11.7959	11.7259	11.3572	10.9742	11.1973	0	11.7012	10.9212	0	12.5283	12.1546	10.8926	11.7092	12.0675	11.1278	11.9631	11.5766	0	0	0	0	0	0	0	0	0	0	0	0	0	0	0	0	0	0	0
VPS8	0	0	0	8.40271	10.5294	11.7506	0	0	0	0	0	0	10.3045	10.0403	10.0438	0	0	0	0	0	0	0	0	0	0	0	0	0	10.9934	9.78551	0	0	0	0	0	0	0	0	0	0	0	0	0	0	0	0	0	0	0
WASHC4	0	0	0	9.90001	9.98466	9.31187	0	0	0	0	0	0	10.3732	10.54	9.99331	9.45256	0	9.54129	0	0	0	0	9.5634	8.97373	0	9.8778	10.3421	0	9.62064	8.92876	0	0	0	0	10.0013	9.60612	9.21536	10.1428	9.89542	0	0	0	0	0	0	9.59802	10.841	10.7154	0
YWHAH	0	0	0	13.3463	14.5296	14.2202	14.3278	12.655	14.0638	14.5828	12.3988	14.5623	0	0	0	0	0	0	13.6401	13.5361	13.5582	13.4195	14.127	13.9384	0	0	0	0	0	0	0	0	0	0	0	0	12.3219	14.7163	13.933	14.2398	12.5039	13.7504	14.3854	12.0925	14.1347	0	0	0	0
ABI1	0	0	0	0	11.1456	11.9299	0	0	0	0	0	0	0	0	0	0	0	0	0	0	0	0	0	0	0	0	0	0	0	0	0	0	0	0	10.9444	10.8963	0	0	0	0	0	0	0	0	0	0	0	0	0
ACOT8	0	0	0	0	10.8221	10.7409	0	0	0	0	0	0	0	0	0	0	0	0	0	0	0	0	0	0	0	0	0	0	0	0	0	0	0	0	11.2812	11.0433	0	10.4429	10.8438	0	0	0	0	0	0	0	0	0	0
ACTA2	0	0	0	0	11.7751	10.9323	0	0	0	12.3528	0	13.1903	0	0	0	0	0	0	0	0	0	0	12.4024	11.8718	0	0	0	0	0	0	0	0	0	0	12.1643	10.9478	0	10.8883	11.408	14.4475	0	13.7008	13.2399	0	13.0256	0	0	0	0
AGFG2	0	0	0	0	9.9624	9.58983	0	0	0	0	0	0	0	0	0	0	0	0	0	0	0	0	0	0	0	0	0	10.5661	9.59134	9.07991	0	0	0	0	0	0	0	0	0	0	0	0	0	0	0	0	0	0	0
AIFM1	0	0	0	0	10.2313	10.831	0	0	0	0	0	0	0	0	0	0	0	0	0	0	0	0	7.49466	7.75525	11.0682	10.466	9.10295	14.6013	9.80146	13.0034	0	0	0	0	8.85253	12.2281	0	11.6579	12.5665	11.3744	0	7.69645	0	0	0	0	0	0	0
AKAP2	0	0	0	0	12.4866	11.9857	13.3256	0	12.0909	14.4837	0	14.0786	0	10.2135	7.75612	0	0	0	0	14.3491	14.026	0	13.7485	13.5488	0	7.96316	9.22311	11.4786	12.0299	11.8618	0	0	0	0	11.6713	11.4517	0	13.5202	13.3897	14.5509	0	13.372	14.1555	0	13.7207	11.1494	0	8.64362	0
AKR1C1	0	0	0	0	8.19822	8.39457	0	0	0	0	0	0	0	0	0	0	0	0	0	0	0	0	12.5628	11.5948	0	0	0	0	0	0	0	0	0	0	0	0	0	9.8272	10.2579	8.97447	0	8.91293	11.0237	0	9.53425	0	0	0	0
ALDH1A1	0	0	0	0	9.06524	8.23881	13.5547	0	10.9968	11.8497	0	12.898	0	0	0	13.5647	8.82505	13.5302	0	15.3333	14.7467	0	16.2643	16.1847	0	0	0	0	0	0	0	0	0	0	9.55406	9.22992	14.0143	12.1259	12.7638	13.3892	0	12.1204	14.3685	0	13.8771	0	0	0	0
ALDH2	0	0	0	0	9.34231	9.44961	12.6169	0	10.0958	11.0126	0	10.5307	0	0	0	0	0	0	0	12.347	10.5461	0	13.2635	13.231	0	0	0	0	0	0	0	0	0	0	9.89814	10.3969	0	11.7002	11.9302	12.0151	0	12.3559	13.4331	0	12.6692	0	0	0	0
ALG9	0	0	0	0	10.7539	9.78709	0	0	0	0	0	0	0	0	0	0	0	0	0	0	0	0	0	0	0	0	0	0	0	0	0	0	0	0	10.5665	10.7477	0	0	0	0	0	0	0	0	0	0	0	0	0
AMD1	0	0	0	0	11.4546	10.8027	0	0	0	12.0695	0	11.2707	0	0	0	0	0	0	0	0	0	0	0	0	0	0	0	0	0	0	0	0	0	0	0	0	0	0	0	11.0328	0	10.1811	0	0	0	0	0	0	0
ANAPC7	0	0	0	0	9.97675	9.8497	0	0	0	0	0	0	0	0	0	0	0	0	0	0	0	0	0	0	0	0	0	9.84856	9.35032	9.63238	0	0	0	0	0	0	9.77548	9.62182	9.75988	0	0	0	0	0	0	0	0	0	0
ANLN	0	0	0	0	12.8583	13.1253	0	0	0	0	0	0	0	0	0	0	0	0	0	0	0	0	0	0	0	0	0	0	0	0	0	0	0	0	11.3903	12.2756	0	0	0	0	0	0	0	0	0	0	0	0	0
ANXA13	0	0	0	0	12.1839	11.5205	0	0	0	10.4817	0	10.7819	0	0	0	0	0	0	0	0	0	0	0	0	0	0	0	0	0	0	0	0	0	0	11.8321	10.5005	0	12.6343	11.9926	0	0	0	0	0	0	0	0	0	0
ARFGEF2	0	0	0	0	13.6516	12.0648	0	0	0	0	0	0	0	0	0	0	0	0	0	0	0	0	12.4041	11.8533	0	0	0	0	0	0	0	0	0	12.9967	13.2837	13.5545	12.6158	12.9955	13.2535	12.0583	13.0299	12.7799	12.322	12.8085	12.9437	12.6218	11.048	12.0289	13.0465
ARHGAP8	0	0	0	0	10.4551	9.94215	0	0	0	0	0	0	0	0	0	0	0	0	0	0	0	0	0	0	0	0	0	0	0	0	0	0	0	0	0	0	0	0	0	0	0	0	0	0	0	0	0	0	0
ATL3	0	0	0	0	11.404	11.1003	0	0	0	11.9044	0	11.584	0	0	0	0	0	0	0	11.2478	10.2987	0	12.7116	11.8778	0	0	0	10.461	6.22984	9.98456	0	0	0	0	11.8147	11.3427	0	11.26	12.0778	12.6085	0	11.514	12.9503	0	12.0159	0	0	0	0
ATP5MF	0	0	0	0	9.92724	9.65715	0	0	0	12.1506	0	12.8875	0	0	0	0	0	0	0	0	0	0	0	0	0	0	0	13.1706	0	11.7723	0	0	0	0	11.6356	11.8803	0	11.0806	13.1268	12.3133	0	11.2508	10.9143	0	9.1593	0	0	0	0
ATP5MK	0	0	0	0	6.88969	8.93737	0	0	0	11.5327	0	11.7594	0	0	0	0	0	0	0	0	0	0	0	0	0	0	0	13.4573	0	12.5157	0	0	0	0	10.966	13.125	0	13.0113	11.3368	12.382	0	12.195	10.2888	0	9.04415	0	0	0	0
ATP5PB	0	0	0	0	11.9302	11.1748	7.89379	9.69981	9.34355	14.1393	0	13.5069	0	0	0	0	0	0	0	0	0	0	9.65342	10.1836	0	0	0	13.5141	7.90923	12.583	0	0	0	0	13.9018	13.4297	0	15.1331	14.6656	11.6595	0	11.1213	10.3567	0	8.57918	0	0	0	0
ATP6V0A1	0	0	0	0	10.3115	9.21093	0	0	0	0	0	0	0	0	0	0	0	0	0	0	0	0	0	0	0	0	0	0	0	0	0	0	0	0	11.4532	10.322	0	0	0	0	0	0	0	0	0	0	0	0	0
ATP6V1H	0	0	0	0	9.19487	8.04193	0	0	0	0	0	0	0	9.72393	8.36672	0	0	0	0	0	0	8.65456	10.2137	9.86977	0	0	0	0	0	0	0	0	0	0	10.5818	9.51657	0	11.2453	10.3717	9.75498	0	9.38262	0	0	0	0	0	0	0
BTF3L4	0	0	0	0	10.644	9.76512	0	0	0	0	0	0	0	0	0	0	0	0	0	0	0	0	12.0087	11.4563	0	0	0	0	0	0	0	0	0	0	0	0	0	11.7246	11.7538	11.8993	0	9.70622	11.8547	0	9.72382	0	0	0	0
C11orf58	0	0	0	0	9.60959	10.5728	0	0	0	0	0	0	0	0	0	0	0	0	0	11.8655	11.8214	0	12.4236	12.5966	0	0	0	0	0	0	0	0	0	0	0	0	0	11.8948	11.0618	0	0	0	0	0	0	0	0	0	0
C3orf56	0	0	0	0	11.5439	10.5735	0	0	0	0	0	0	0	0	0	0	0	0	0	0	0	0	0	0	0	0	0	0	0	0	0	0	0	0	0	0	0	11.6548	11.213	0	0	0	0	0	0	0	0	0	0
C6orf132	0	0	0	0	9.60048	8.48476	0	0	0	10.9895	0	10.809	0	0	0	0	0	0	0	0	0	0	0	0	0	0	0	11.0576	0	10.8137	0	0	0	0	0	0	0	8.81965	8.89282	0	0	0	0	0	0	0	0	0	0
CARM1	0	0	0	0	10.6318	10.059	11.815	0	10.4667	12.8663	0	11.1394	0	0	0	0	0	0	0	11.3292	11.1718	0	12.9373	12.8952	0	0	0	0	0	0	0	0	0	0	11.1721	9.60474	0	12.4505	11.5932	12.5057	0	11.935	12.953	0	12.4729	0	0	0	0
CCNH	0	0	0	0	11.5425	10.4673	0	0	0	0	0	0	0	0	0	0	0	0	0	0	0	0	0	0	0	0	0	0	0	0	0	0	0	0	10.4491	9.9567	0	0	0	0	0	0	0	0	0	0	0	0	0
CDH1	0	0	0	0	11.516	10.7044	0	0	0	12.8387	0	12.0612	0	0	0	0	0	0	0	12.9986	12.1573	0	13.6747	13.0061	0	0	0	12.4024	0	11.8608	0	0	0	0	11.7133	10.5964	0	12.9707	13.0316	0	0	0	0	0	0	0	0	0	0
CFAP43	0	0	0	0	13.479	12.6146	0	0	0	13.7571	0	13.2136	0	0	0	0	0	0	0	0	0	0	0	0	0	0	0	0	0	0	0	0	0	0	14.5714	13.3957	0	14.7772	14.6001	13.9257	0	11.3761	12.6605	0	10.3674	0	0	0	0
CHCHD3	0	0	0	0	11.1856	11.0155	0	0	0	10.0554	0	12.3464	0	0	0	0	0	0	0	0	0	0	8.30989	6.81046	0	0	0	11.8593	0	10.9051	0	0	0	0	13.1494	12.4868	0	14.0258	13.8231	11.4224	0	9.93239	8.74212	0	7.68531	0	0	0	0
CHTOP	0	0	0	0	9.83381	8.96122	0	0	0	0	0	0	0	0	0	0	0	0	0	0	0	0	0	0	0	0	0	14.4878	9.88283	13.4233	0	10.0218	10.8456	0	0	0	0	0	0	0	0	0	0	0	0	8.9225	10.9278	10.692	0
CLIC4	0	0	0	0	10.7132	9.91853	0	0	0	12.5912	0	11.1847	0	0	0	0	0	0	0	11.7014	10.6302	0	12.7529	12.1223	0	0	0	0	0	0	0	0	0	0	11.1206	9.99096	0	0	0	11.0683	0	9.8948	12.0912	0	10.7527	0	0	0	0
CLPTM1L	0	0	0	0	10.512	9.94407	0	0	0	0	0	0	0	0	0	0	0	0	0	0	0	0	0	0	0	0	0	0	0	0	0	0	0	0	10.8684	10.1919	0	9.07548	10.0758	0	0	0	0	0	0	0	0	0	0
COPS3	0	0	0	0	9.58041	9.57714	9.53396	10.0554	0	0	0	0	0	0	0	0	0	0	0	0	0	0	12.1545	11.706	0	0	0	0	0	0	0	0	0	0	0	0	10.0856	10.4489	9.66357	0	0	0	11.4625	10.4799	10.261	0	0	0	0
COPS7A	0	0	0	0	9.37632	8.63909	0	0	0	0	0	0	0	0	0	0	0	0	0	0	0	0	11.8132	10.5015	0	0	0	0	0	0	0	0	0	0	0	0	0	0	0	0	0	0	0	0	0	0	0	0	0
COQ8A	0	0	0	0	11.9428	9.83926	0	0	0	0	0	0	0	0	0	0	0	0	0	0	0	0	0	0	0	0	0	0	0	0	0	0	0	0	12.2258	10.2958	0	12.5111	12.0332	0	0	0	0	0	0	0	0	0	0
COX4I1	0	0	0	0	10.3811	9.62355	0	0	0	12.9616	0	11.664	0	0	0	0	0	0	0	0	0	0	0	0	0	0	0	12.7435	10.3032	11.8056	0	0	0	0	13.1701	12.2068	0	14.0039	14.4322	9.24871	0	11.2054	0	0	0	0	0	0	0
COX5B	0	0	0	0	9.05742	8.99499	0	0	0	10.4039	0	10.0353	0	0	0	0	0	0	0	0	0	0	0	0	0	0	0	13.8934	0	12.4011	0	0	0	0	9.52818	9.20087	0	13.5199	13.4567	0	0	0	0	0	0	0	0	0	0
COX6C	0	0	0	0	12.02	11.8501	0	0	0	14.3555	0	13.9739	0	0	0	0	0	0	0	0	0	0	11.3923	10.8719	0	0	0	12.7831	0	11.9498	0	0	0	0	13.67	13.1761	0	14.6015	14.4736	12.8675	0	11.8497	11.5504	0	10.6155	0	0	0	0
COX7A2	0	0	0	0	11.787	10.7332	0	0	0	12.3146	0	13.7028	0	0	0	0	0	0	0	0	0	0	10.3179	10.2523	0	0	0	14.1736	0	12.9662	0	0	0	0	12.0185	12.1721	0	11.2881	13.6302	12.2258	0	10.4489	0	0	0	0	0	0	0
CPNE3	0	0	0	0	11.7384	11.9711	14.3841	0	13.7017	12.6021	0	13.8	0	0	0	0	0	0	0	13.7749	13.7691	0	13.2358	13.1624	0	0	0	11.4323	0	10.6367	0	0	0	0	13.4721	14.0765	0	12.1017	12.6964	14.1766	0	14.1578	14.44	0	14.3771	0	0	0	0
CYB5B	0	0	0	0	11.8251	11.5609	0	0	0	11.4299	0	11.988	0	0	0	0	0	0	0	10.9747	12.0539	0	11.8331	12.2117	0	0	0	15.2463	0	13.6498	0	0	0	0	12.7059	13.0075	0	13.9297	13.9003	12.113	0	10.5874	11.8157	0	11.5261	0	0	0	0
CYB5R3	0	0	0	0	11.1678	10.0733	0	0	0	0	0	0	0	0	0	0	0	0	0	0	0	0	0	0	0	0	0	13.2417	0	10.8819	0	0	0	0	12.5904	11.499	0	13.1146	13.1111	0	0	0	0	0	0	0	0	0	0
CYP51A1	0	0	0	0	10.4799	9.74045	0	0	0	0	0	0	0	0	0	10.1573	10.5469	10.4394	0	0	0	0	0	0	11.694	10.7596	10.0875	12.2938	0	11.3052	0	0	0	8.50402	11.4133	11.1921	0	12.0907	11.4797	9.46181	0	10.3345	9.80934	0	9.78253	0	0	0	0
DDX10	0	0	0	0	10.6649	9.58835	0	0	0	0	0	0	0	0	0	0	0	0	0	0	0	0	0	0	0	0	0	0	0	0	0	0	0	0	0	0	0	9.22782	8.59818	0	0	0	0	0	0	0	0	0	0
DDX20	0	0	0	0	9.76264	9.64558	0	0	0	0	0	0	0	10.0005	8.92299	0	0	0	0	0	0	0	11.2968	10.4356	0	0	0	7.78862	10.2632	9.78608	0	0	0	0	0	0	0	10.6611	10.5856	0	0	0	0	0	0	0	0	0	0
DHX36	0	0	0	0	12.4657	11.0027	0	0	0	0	0	0	0	0	0	0	0	0	0	0	0	0	0	0	0	0	0	0	0	0	0	0	0	0	0	0	0	0	0	0	0	0	0	0	0	0	0	0	0
DNAJC11	0	0	0	0	13.5991	13.1669	18.0012	12.6184	17.173	0	0	0	0	0	0	0	0	0	0	0	0	0	0	0	0	0	0	0	0	0	0	0	0	0	0	0	0	0	0	0	0	0	18.8684	11.4689	17.8331	9.90805	10.4058	10.9024	0
DNM2	0	0	0	0	9.44373	10.5124	0	0	0	13.4624	0	13.5119	0	0	0	0	0	0	0	12.6473	12.1864	0	11.4663	11.7356	0	0	0	10.3463	11.0325	10.536	0	0	0	0	10.2844	10.5432	0	9.85047	8.33907	12.5825	0	12.0034	12.783	0	12.549	0	0	0	0
ECH1	0	0	0	0	11.1721	10.0179	0	0	0	0	0	0	0	0	0	0	0	0	0	0	0	0	9.69122	9.15803	0	0	0	0	0	0	0	0	0	0	11.5823	11.1366	0	11.7589	10.3442	0	0	0	9.65637	0	9.96153	0	0	0	0
EHD1	0	0	0	0	9.58778	9.45753	0	0	0	0	0	0	0	0	0	0	0	0	0	12.0566	11.4652	0	10.7929	11.9988	0	0	0	0	0	0	0	0	0	0	10.6089	10.1534	0	12.1402	11.4946	10.5983	0	11.1971	11.0212	0	11.3869	0	0	0	0
EIF2AK2	0	0	0	0	9.35822	9.65987	0	0	0	0	0	0	0	0	0	0	0	0	0	0	0	0	10.3674	10.2831	0	0	0	0	0	0	0	0	0	0	0	0	0	0	0	0	0	0	0	0	0	0	0	0	0
EMC2	0	0	0	0	10.3735	9.69556	0	0	0	0	0	0	0	0	0	0	0	0	0	0	0	0	0	0	0	0	0	0	0	0	0	0	0	0	8.78408	9.60029	0	0	0	0	0	0	0	0	0	0	0	0	0
EPB41L2	0	0	0	0	10.4017	9.42402	0	0	0	8.998	0	9.61579	0	0	0	0	0	0	0	11.5836	10.1301	0	11.5792	11.1154	0	0	0	0	0	0	0	0	0	0	9.09306	8.27065	0	12.9796	11.6507	10.0652	0	9.79003	0	0	0	0	0	0	0
EPB41L5	0	0	0	0	9.9369	8.69862	0	0	0	0	0	0	0	0	0	0	0	0	0	0	0	0	0	0	0	0	0	0	0	0	0	0	0	0	11.0996	9.63798	8.0486	11.4086	9.91713	0	0	0	0	0	0	0	0	0	0
ERVMER34-1	0	0	0	0	10.8464	10.1316	0	0	0	0	0	0	11.2964	11.3907	10.9564	11.3153	9.2567	10.6828	0	0	0	0	0	0	0	0	0	10.8127	10.6647	10.3134	0	0	0	0	10.312	9.63583	0	9.41098	9.55266	0	0	0	0	0	0	10.2945	11.8299	9.96591	0
ESYT1	0	0	0	0	10.1304	11.7391	12.0847	11.627	10.2739	10.4278	0	12.0677	0	0	0	0	0	0	0	11.722	10.5091	0	13.0234	12.3633	0	0	0	0	0	0	0	0	0	0	13.2912	13.4755	0	12.9074	13.4124	13.3261	0	12.362	12.9107	0	11.9401	0	0	0	0
EXOC1	0	0	0	0	9.28869	8.53646	0	0	0	0	0	0	0	0	0	0	0	0	0	0	0	0	0	0	0	0	0	0	0	0	0	0	0	0	0	0	0	11.3376	10.4755	0	0	0	0	0	0	0	0	0	0
FAM126A	0	0	0	0	9.97867	9.54536	0	0	0	0	0	0	0	0	0	0	0	0	0	0	0	0	0	0	0	0	0	0	0	0	0	0	0	0	9.94624	8.7896	0	11.2164	9.96698	0	0	0	0	0	0	0	0	0	0
FAM162A	0	0	0	0	11.4714	11.1129	0	0	0	9.85069	0	11.2938	0	0	0	0	0	0	0	0	0	0	11.1433	9.96254	0	0	0	12.5173	0	10.9723	0	0	0	0	12.5009	12.4377	0	11.9767	13.0197	0	0	0	0	0	0	0	0	0	0
FLNB	0	0	0	0	11.673	9.61266	18.921	15.1831	18.1836	18.4829	13.8602	19.2263	0	0	0	0	0	0	11.6158	18.4026	18.184	0	16.741	16.727	0	0	0	10.6728	10.9305	11.5745	0	0	0	0	0	0	0	0	0	18.8714	13.14	18.217	18.5236	16.0579	18.2885	0	0	0	0
FLOT1	0	0	0	0	9.30236	9.22588	0	0	0	0	0	0	0	0	0	0	0	0	0	0	0	0	0	0	0	0	0	13.4255	0	11.9765	0	0	0	0	10.9067	10.2102	0	11.2871	10.8103	0	0	0	0	0	0	0	0	0	0
FLOT2	0	0	0	0	9.24886	8.64015	0	0	0	0	0	0	0	0	0	0	0	0	0	0	0	0	0	0	0	0	0	14.1883	9.07992	11.8651	0	0	0	0	9.19391	9.81984	0	11.0446	10.8587	0	0	0	0	0	0	0	0	0	0
FTO	0	0	0	0	10.5087	10.6059	0	0	0	11.7646	0	11.6513	0	0	0	0	0	0	0	0	0	0	12.0141	11.508	0	0	0	0	0	0	0	0	0	0	0	0	0	0	0	11.3023	0	10.9383	9.60199	0	10.6484	0	0	0	0
G6PD	0	0	0	0	8.22086	8.21747	0	0	0	7.25301	0	9.20977	0	0	0	0	0	0	0	11.7568	10.4726	0	13.4353	12.9221	0	0	0	0	0	0	0	0	0	0	6.08682	8.41166	0	8.6618	8.20938	12.0838	0	11.342	12.9333	0	12.5507	0	0	0	0
GCDH	0	0	0	0	12.3561	11.8308	0	0	0	11.7327	0	10.9053	0	0	0	0	0	0	0	0	0	0	0	0	0	0	0	0	0	0	0	0	0	0	12.8169	12.0708	0	12.9534	12.6169	0	0	0	0	0	0	0	0	0	0
GHITM	0	0	0	0	11.0323	10.2708	0	0	0	12.7918	0	12.0293	0	0	0	0	0	0	0	0	0	0	0	0	0	0	0	12.9692	0	11.1725	0	0	0	0	12.2442	11.6934	0	12.7171	12.2247	0	0	0	0	0	0	0	0	0	0
GLDC	0	0	0	0	10.4619	9.63024	0	0	0	9.29459	0	8.52085	0	0	0	0	0	0	0	0	0	0	0	0	0	0	0	0	0	0	0	0	0	0	0	0	0	12.1293	11.4025	0	0	0	0	0	0	0	0	0	0
GLS	0	0	0	0	10.3699	8.2974	0	0	0	11.8086	0	11.7655	0	0	0	0	0	0	0	10.636	8.43131	0	12.9678	12.2242	0	0	0	0	0	0	0	0	0	0	10.78	10.2456	0	12.2174	12.3106	12.4635	0	10.8695	13.1061	0	11.968	0	0	0	0
GLUL	0	0	0	0	8.24512	7.30898	0	0	0	8.65428	0	8.49687	0	0	0	0	0	0	0	13.7646	13.238	0	13.1795	13.6569	0	0	0	0	0	0	0	0	0	0	8.69064	7.77353	0	9.11373	8.63247	0	0	0	9.43973	0	8.34221	0	0	0	0
GMEB2	0	0	0	0	11.871	11.0724	0	0	0	0	0	0	0	0	0	0	0	0	0	13.3025	12.9963	0	13.2656	12.7278	0	0	0	0	10.9907	10.5007	0	0	0	0	10.5832	10.0829	0	12.4684	12.3248	12.8483	0	12.3787	12.9995	0	11.5664	0	0	0	0
GNA11	0	0	0	0	8.73318	8.63874	0	0	0	10.8974	0	9.76832	0	0	0	0	0	0	0	11.451	11.2694	0	11.6541	11.3159	0	0	0	0	0	0	0	0	0	0	0	0	0	12.8521	11.7909	10.967	0	9.44411	0	0	0	0	0	0	0
GNAI3	0	0	0	0	11.2388	10.8245	11.9028	0	10.4173	12.5941	0	12.7343	0	0	0	0	0	0	0	12.3673	11.6359	0	12.6247	12.0421	0	0	0	12.0163	0	11.3284	0	0	0	0	11.4249	10.874	0	12.9262	12.7726	12.3704	0	12.3859	12.2552	0	11.3649	0	0	0	0
GNG12	0	0	0	0	10.4883	9.9371	0	0	0	10.6801	0	10.1935	0	0	0	0	0	0	0	10.8406	11.4146	0	11.9537	10.6902	0	0	0	10.9683	6.67765	9.57237	0	0	0	0	10.6343	10.2206	0	12.4204	11.5773	0	0	0	0	0	0	0	0	0	0
GORASP2	0	0	0	0	10.5859	9.04688	0	0	0	11.2493	0	11.0723	0	0	0	0	0	0	0	11.7096	10.862	0	12.9148	12.5925	0	0	0	11.2026	0	10.0298	0	0	0	0	10.5542	9.72829	0	12.2776	10.4675	11.329	0	9.5166	11.9757	0	11.657	0	0	0	0
GPD2	0	0	0	0	8.7212	7.49253	0	0	0	11.733	0	9.73711	0	0	0	0	0	0	0	0	0	0	0	0	0	0	0	12.8886	0	10.4819	0	0	0	0	0	0	0	12.9534	12.1854	0	0	0	0	0	0	0	0	0	0
GSS	0	0	0	0	11.5478	11.3203	13.5474	11.5434	13.2061	11.4129	0	12.2549	0	0	0	0	12.2668	12.1876	0	0	0	0	14.2411	14.0707	0	12.1903	12.4983	11.2609	12.366	11.3068	0	0	0	0	12.4675	12.6518	0	13.2922	14.5107	0	0	0	12.0622	12.3642	13.4642	0	0	0	0
HEATR5B	0	0	0	0	10.1741	10.3825	0	0	0	0	0	0	10.6785	12.1626	11.4317	10.6064	11.1577	10.5555	0	0	0	0	11.0973	10.7119	9.74465	9.67978	11.8483	0	11.7801	10.3232	0	0	0	0	11.327	10.1818	8.795	10.8447	11.2431	0	0	0	11.3071	0	10.4115	10.9309	11.5957	11.2837	10.5316
HEXIM1	0	0	0	0	10.4595	9.53679	0	0	0	12.0225	0	11.3516	0	0	0	0	0	0	0	10.4572	9.61688	0	11.8276	11.1881	0	0	0	0	0	0	0	0	0	0	0	0	0	11.6006	10.344	11.2496	0	9.94988	11.9772	0	10.6852	0	0	0	0
HINT1	0	0	0	0	9.84527	8.29027	0	0	0	11.0784	0	9.74853	0	0	0	0	0	0	0	12.6778	12.0773	0	14.8324	14.1079	0	0	0	0	0	0	0	0	0	0	10.8141	8.2312	0	12.5355	12.1362	0	0	0	12.3908	0	11.6893	0	0	0	0
HSD17B7	0	0	0	0	13.5568	13.9894	0	0	0	0	0	0	0	0	0	0	0	0	0	0	0	0	14.7159	14.2256	0	0	0	0	0	0	0	0	0	0	13.9594	12.503	0	13.5693	13.5413	14.5153	0	15.0305	15.219	0	15.2183	0	0	0	0
HYOU1	0	0	0	0	9.64799	8.29806	11.9365	0	9.55852	10.2071	0	9.77297	0	0	0	4.8106	11.4029	8.77933	0	13.0867	12.5699	0	13.8223	14.0794	10.4123	6.96388	7.45212	7.79886	0	6.83649	0	0	0	0	10.7434	8.77185	0	12.0514	11.631	12.238	0	11.4156	13.6951	0	12.8201	0	0	0	0
IGF2BP2	0	0	0	0	10.7136	11.1222	0	0	0	0	0	0	0	0	0	0	0	0	0	0	0	0	11.0576	10.6711	0	0	0	0	9.75368	9.87343	0	0	0	0	10.4034	10.7925	0	0	0	0	0	0	0	0	0	0	0	0	0
IGKV2D-24	0	0	0	0	12.5227	12.0098	0	0	0	0	0	0	0	0	0	0	0	0	0	0	0	0	0	0	0	0	0	0	0	0	0	0	0	0	0	0	0	0	0	0	0	0	0	0	0	0	0	0	0
KIFBP	0	0	0	0	11.3679	11.5675	0	0	0	0	0	0	11.5854	10.9545	11.1591	0	0	0	0	0	0	0	0	0	0	0	0	12.6482	11.0335	12.0325	0	0	0	0	12.1948	11.4159	0	12.622	11.8602	0	0	0	0	0	0	11.7353	12.1525	11.5892	0
LAMTOR1	0	0	0	0	9.01691	9.47411	0	0	0	10.0865	0	9.10821	0	0	0	0	0	0	0	0	0	0	10.0484	10.0837	0	0	0	11.9575	0	10.9385	0	0	0	0	9.81397	9.52651	0	12.3222	9.88974	0	0	0	0	0	0	0	0	0	0
LANCL2	0	0	0	0	10.1373	12.3331	0	0	0	0	0	0	0	0	0	0	0	0	0	0	0	0	0	0	0	0	0	0	0	0	0	0	0	0	0	0	0	0	0	0	0	0	0	0	0	0	0	0	0
LARS1	0	0	0	0	10.2045	9.20232	0	0	0	0	0	0	0	0	0	0	0	0	0	0	0	0	11.9975	11.2239	0	0	0	0	0	0	0	0	0	0	10.3286	9.13697	0	9.90673	10.6636	0	0	0	11.3143	0	9.12718	0	0	0	0
LGALS2	0	0	0	0	10.4319	9.73812	0	0	0	0	0	0	0	0	0	0	0	0	0	0	0	0	13.2519	12.4158	0	0	0	9.63634	0	8.99894	0	0	0	0	11.1523	10.068	0	11.9096	11.6866	0	0	0	0	0	0	0	0	0	0
MAIP1	0	0	0	0	10.9749	8.69787	0	0	0	0	0	0	0	0	0	0	0	0	0	0	0	0	0	0	0	0	0	0	0	0	0	0	0	0	11.5146	9.87458	0	0	0	0	0	0	0	0	0	0	0	0	0
MAP2K2	0	0	0	0	11.4417	10.0489	0	0	0	0	0	0	0	0	0	0	0	0	0	0	0	0	12.0605	11.3695	0	0	0	0	0	0	0	0	0	0	11.1544	10.8084	0	10.9263	11.5388	10.2074	0	10.8149	11.9715	0	10.8111	0	0	0	0
MARCKSL1	0	0	0	0	11.6473	10.9494	0	0	0	13.1463	0	12.6186	0	0	0	0	0	0	0	12.1952	11.6719	0	13.3142	12.7308	0	0	0	12.4299	0	10.8986	0	0	0	0	11.9736	10.8675	0	14.7043	13.9434	0	0	0	11.0408	0	10.0888	0	0	0	0
MATR3	0	0	0	0	12.7095	12.139	0	0	0	0	0	0	10.512	10.5269	10.0818	10.2356	9.9331	9.49899	0	0	0	0	0	0	0	0	0	12.1171	10.2845	11.2656	0	0	0	0	0	0	0	10.7018	10.5081	0	0	0	0	0	0	9.79364	11.8074	10.5378	0
MGST3	0	0	0	0	12.2057	11.0412	0	0	0	13.3831	0	12.5769	0	0	0	0	0	0	0	0	0	0	0	0	0	0	0	13.2101	0	12.2204	0	0	0	0	13.353	12.7774	0	13.6437	14.0344	12.1569	0	10.2077	0	0	0	0	0	0	0
MISP	0	0	0	0	11.0936	9.03746	0	0	0	14.0932	0	13.6806	0	7.91073	7.55854	0	0	0	0	15.1447	14.581	0	13.9772	13.6157	0	0	0	7.92422	7.58714	7.5297	0	0	0	0	11.3675	8.01831	0	12.7031	12.2792	12.8496	0	11.5739	11.6138	0	10.7131	0	0	0	0
MRPL11	0	0	0	0	9.73368	8.27004	0	0	0	10.5089	0	9.86555	0	0	0	0	0	0	0	0	0	0	0	0	0	0	0	11.8761	8.39137	11.2894	0	0	0	0	10.5308	8.93369	0	12.0824	11.5925	0	0	0	0	0	0	0	0	0	0
MRPL37	0	0	0	0	8.81844	7.40092	0	0	0	0	0	0	0	0	0	0	0	0	0	0	0	0	0	0	0	0	0	12.0969	0	9.5829	0	0	0	0	0	0	0	11.7012	11.6137	0	0	0	0	0	0	0	0	0	0
MRPS31	0	0	0	0	9.65956	9.56573	0	0	0	0	0	0	0	0	0	0	0	0	0	0	0	0	0	0	0	0	0	0	0	0	0	0	0	0	10.4213	9.99472	0	12.2257	12.4633	0	0	0	0	0	0	0	0	0	0
MRPS35	0	0	0	0	9.76597	7.97794	0	0	0	10.6623	0	10.4031	0	0	0	0	0	0	0	0	0	0	0	0	0	0	0	10.4806	0	10.4653	0	0	0	0	10.6081	8.43575	0	12.9365	12.0663	0	0	0	0	0	0	0	9.85597	9.64767	0
MT-CO2	0	0	0	0	10.9811	11.3674	0	0	0	13.5971	0	12.4765	0	0	0	10.6555	10.4323	10.9093	0	0	0	0	0	0	0	0	0	13.0537	0	11.772	0	0	0	0	12.7995	12.9169	0	11.27	13.2382	11.9233	0	10.222	0	0	0	0	0	0	0
MT-CO3	0	0	0	0	10.1616	8.90311	0	0	0	11.3105	0	12.7789	0	0	0	0	0	0	0	0	0	0	0	0	0	0	0	0	0	0	0	0	0	0	11.7561	11.5016	0	11.6432	12.1427	9.78355	0	8.77813	0	0	0	0	0	0	0
MTCH2	0	0	0	0	9.60204	8.76787	0	0	0	11.5619	0	12.0851	0	0	0	0	0	0	0	0	0	0	0	0	0	0	0	13.2564	0	11.5518	0	0	0	0	12.5065	12.1398	0	13.4864	13.519	11.1032	0	9.21956	0	0	0	0	0	0	0
MTMR2	0	0	0	0	9.50146	7.97728	0	0	0	0	0	0	0	0	0	0	0	0	0	0	0	0	0	0	0	0	0	0	0	0	0	0	0	0	0	0	0	0	0	0	0	0	0	0	0	0	0	0	0
MTX1	0	0	0	0	11.3614	10.2454	0	0	0	11.4918	0	10.7036	0	0	0	0	0	0	0	0	0	0	0	0	0	0	0	12.7796	0	11.1551	0	0	0	0	12.0947	11.3831	0	12.6274	12.9355	0	0	0	0	0	0	0	0	0	0
MTX2	0	0	0	0	9.29548	8.782	0	0	0	9.07535	0	10.4162	0	0	0	0	0	0	0	0	0	0	0	0	0	0	0	14.435	0	13.1387	0	0	0	0	10.7058	10.6268	0	12.2417	12.2348	0	0	0	0	0	0	0	0	0	0
MYO1C	0	0	0	0	12.0557	12.0447	11.8009	0	9.16635	12.298	0	12.4237	0	0	0	0	0	0	0	13.2412	12.3936	0	12.4117	12.4	0	0	0	12.407	6.30181	11.239	0	0	0	0	11.215	11.6008	0	14.0966	13.5339	13.7172	0	13.0393	11.8992	0	10.5869	0	0	0	0
NAA10	0	0	0	0	10.1048	9.79562	0	0	0	11.7404	0	10.2948	0	9.30619	9.35275	9.39396	7.29278	9.06686	0	0	0	0	12.0216	10.4217	0	0	0	0	0	0	0	0	0	0	0	0	0	12.4363	11.4593	0	0	0	12.2972	0	10.0911	0	0	0	0
NDUFA6	0	0	0	0	9.53362	8.41282	0	0	0	11.489	0	10.4259	0	0	0	0	0	0	0	0	0	0	0	0	0	0	0	0	0	0	0	0	0	0	9.97602	8.73986	0	11.7039	10.8828	0	0	0	0	0	0	0	0	0	0
NDUFA9	0	0	0	0	8.78398	9.22758	0	0	0	10.7698	0	10.6513	0	0	0	0	0	0	0	0	0	0	0	0	0	0	0	12.3651	8.61055	11.6936	0	0	0	0	10.8818	10.7627	0	12.5174	12.3177	0	0	0	0	0	0	0	0	0	0
NDUFV1	0	0	0	0	7.50985	6.89548	0	0	0	8.73889	0	9.55069	0	0	0	0	0	0	0	0	0	0	0	0	0	0	0	13.6778	0	12.0199	0	0	0	0	9.37855	8.55878	0	11.7941	11.6707	0	0	0	0	0	0	0	0	0	0
NUP133	0	0	0	0	11.3564	10.7399	0	0	0	0	0	0	0	0	0	0	0	0	0	0	0	0	0	0	10.0359	10.5113	10.8049	9.55416	10.6792	10.5059	0	0	0	0	10.0696	9.18688	0	10.3602	10.6584	0	0	0	0	0	0	0	0	0	0
NUP155	0	0	0	0	12.1487	10.3455	0	0	0	0	0	0	0	0	0	0	0	0	0	0	0	0	12.059	10.4884	0	0	0	14.7033	0	14.5017	0	0	0	0	12.2856	11.8983	0	11.2247	11.9298	0	0	0	0	0	0	0	0	0	0
ORMDL3	0	0	0	0	12.003	10.9476	0	0	0	0	0	0	0	0	0	0	0	0	0	0	0	0	0	0	0	0	0	0	0	0	0	0	0	0	12.4929	11.1762	0	12.5954	11.7265	0	0	0	0	0	0	0	0	0	0
OSBP	0	0	0	0	9.60059	8.8042	0	0	0	11.7952	0	10.268	0	0	0	0	0	0	0	0	0	0	11.759	9.98473	0	0	0	0	0	0	0	0	0	0	11.4151	9.51848	0	12.2235	11.0836	11.0172	0	9.8856	12.0041	0	10.5886	0	0	0	0
OTUB1	0	0	0	0	9.08276	8.06361	12.8811	0	10.5234	12.469	0	11.605	0	0	0	0	0	0	0	12.6869	11.8352	0	13.807	13.5686	0	0	0	0	0	0	0	0	0	0	10.6199	9.27639	0	12.3552	11.8044	12.4956	0	11.6867	13.4206	0	12.8437	0	0	0	0
PARD3	0	0	0	0	11.1894	10.8969	0	0	0	11.4677	0	11.3744	0	0	0	0	0	0	0	0	0	0	11.7123	11.0169	0	0	0	11.8186	10.8178	11.0692	0	0	0	0	11.5171	10.9323	0	11.5779	11.7661	11.6487	0	11.3457	11.3187	0	11.4459	0	0	0	0
PATL1	0	0	0	0	11.1711	10.3122	0	0	0	0	0	0	0	0	0	0	0	0	0	0	0	0	0	0	0	0	0	0	0	0	0	0	0	0	0	0	0	0	0	0	0	0	0	0	0	0	0	0	0
PCYT1B	0	0	0	0	9.70414	10.391	0	0	0	10.0379	0	10.7014	0	0	0	0	0	0	0	11.0058	9.71228	0	11.1883	10.6783	0	0	0	0	0	0	0	0	0	11.3164	11.3208	10.1978	11.2365	10.0139	11.571	11.1869	0	9.85373	0	0	0	0	0	0	0
PDCD5	0	0	0	0	10.564	9.9039	0	0	0	12.8731	0	11.2607	0	0	0	0	0	0	0	13.4901	12.1393	0	14.5386	13.9591	0	0	0	12.1676	0	11.0728	0	0	0	0	11.1781	9.99732	0	12.9047	12.1284	11.2699	0	10.2093	12.8749	0	12.2964	0	0	0	0
PDCD6IP	0	0	0	0	10.2479	10.2313	13.3414	0	11.9928	12.1622	0	12.7325	0	0	0	0	0	0	0	12.9477	12.2515	0	13.7096	13.5215	0	0	0	9.75904	4.30283	7.08375	0	0	0	0	10.6608	10.6247	0	10.5384	11.7004	13.4626	0	12.2847	13.5234	0	13.3626	0	0	0	0
PDHB	0	0	0	0	11.7255	10.7391	0	0	0	12.2256	0	11.5411	0	0	0	0	0	0	0	0	0	0	9.86696	7.83039	0	0	0	15.1607	7.24584	13.677	0	0	0	0	12.5802	12.1016	0	14.5641	15.2704	10.8621	0	10.1649	0	0	0	0	0	0	0
PHAX	0	0	0	0	10.5442	10.2345	0	0	0	0	0	0	0	0	0	0	0	0	0	0	0	0	11.8324	10.2975	0	0	0	0	0	0	0	0	0	0	10.328	9.74813	0	10.2033	10.1737	0	0	0	0	0	0	0	0	0	0
PHYHIP	0	0	0	0	12.0073	12.4211	0	0	0	0	0	0	0	0	0	0	0	0	0	0	0	0	8.23192	11.8568	0	0	0	0	0	0	0	0	0	0	9.76106	12.0204	0	0	0	11.9157	0	11.8111	12.2898	0	11.7423	0	0	0	0
PIP4P1	0	0	0	0	11.4213	12.0835	0	0	0	0	0	0	0	12.0551	11.1815	0	0	0	0	12.3628	11.7647	13.5976	12.497	12.0917	0	0	0	12.0248	10.8881	10.4119	0	0	0	0	11.6461	12.6987	9.82566	11.1526	11.3279	12.3963	0	10.279	0	0	0	0	0	0	0
PLBD2	0	0	0	0	10.3227	11.1448	0	0	0	10.9388	0	12.5089	0	0	0	0	0	0	0	11.568	11.9411	0	0	0	0	0	0	0	0	0	0	0	0	0	0	0	0	11.5249	10.8103	0	0	0	0	0	0	0	0	0	0
PLOD1	0	0	0	0	10.1789	9.83441	0	0	0	0	0	0	0	0	0	0	0	0	0	0	0	0	11.4519	9.85695	0	0	0	0	0	0	0	0	0	0	10.428	11.0999	0	11.1709	11.1043	10.4218	0	9.14459	0	0	0	0	0	0	0
PLOD3	0	0	0	0	8.92979	9.55273	0	0	0	0	0	0	0	10.4494	10.6512	9.9714	10.1191	10.3872	0	0	0	0	0	0	0	0	0	7.93734	10.9615	9.95392	0	0	0	0	10.8819	11.3943	0	11.3297	11.1424	0	0	0	0	0	0	0	0	0	0
PMPCA	0	0	0	0	7.98598	7.64191	12.5496	0	11.6725	14.4608	0	13.0437	0	0	0	0	0	0	0	0	0	0	10.9884	9.11385	0	0	0	0	0	0	0	0	0	0	8.90614	7.56037	0	12.299	11.3884	13.8968	5.68667	13.6192	13.7495	0	13.4138	0	0	0	0
PNPT1	0	0	0	0	10.3475	9.55936	0	0	0	10.2625	0	10.0786	0	0	0	0	0	0	0	0	0	11.6118	7.78038	8.514	0	0	0	10.6764	8.74796	9.48945	0	0	0	0	10.3666	9.47416	0	12.6841	12.7724	0	0	0	0	0	0	0	0	0	0
POF1B	0	0	0	0	8.6946	9.79563	0	0	0	9.59582	0	9.72705	0	0	0	0	0	0	0	11.0749	9.81105	0	11.3616	10.1714	0	0	0	11.4413	10.0503	9.97882	0	0	0	0	12.1112	11.1741	0	12.0911	10.6914	0	0	0	0	0	0	0	0	0	0
POLR2K	0	0	0	0	9.89995	9.25873	0	0	0	0	0	0	0	0	0	0	0	0	0	0	0	0	0	0	0	0	0	0	0	0	0	0	0	0	0	0	0	0	0	0	0	0	0	0	0	0	0	0	0
PPID	0	0	0	0	10.1144	9.67745	0	0	0	0	0	0	0	0	0	10.8093	10.9044	10.3765	0	10.626	10.2539	0	12.6289	11.783	0	0	0	0	0	0	0	0	0	0	0	0	0	10.6451	10.1096	10.6963	0	10.932	10.8938	0	10.715	0	0	0	0
PPP2R1B	0	0	0	0	9.35327	9.17406	0	0	0	11.653	0	10.167	0	0	0	0	0	0	0	0	0	0	11.8702	10.6835	0	0	0	10.224	8.03282	9.48734	0	0	0	0	9.99343	9.20107	0	9.57419	10.0762	0	0	0	10.4464	0	9.97988	0	0	0	0
PRKAA1	0	0	0	0	10.2428	10.1093	0	0	0	0	0	0	0	0	0	0	0	0	0	0	0	0	11.3018	10.5442	0	0	0	0	0	0	0	0	0	0	0	0	0	11.3424	10.7963	0	0	0	0	0	0	0	0	0	0
PRKACA	0	0	0	0	10.2122	9.79295	0	0	0	0	0	0	0	0	0	0	0	0	0	0	0	0	0	0	0	0	0	0	10.9986	9.62626	0	0	0	0	0	0	0	9.78032	10.553	0	0	0	0	0	0	0	0	0	0
PRKAR2A	0	0	0	0	12.4505	11.7299	0	0	0	14.3507	0	13.8645	0	0	0	0	0	0	0	12.8845	11.9993	0	13.9644	12.8547	0	0	0	0	0	0	0	0	0	0	12.1897	12.2063	0	14.6099	13.5713	0	0	0	13.5798	0	12.1048	0	0	0	0
PSMG2	0	0	0	0	8.45175	8.70843	0	0	0	11.6751	0	11.2936	0	9.53099	8.54061	0	0	0	0	11.2117	10.6065	0	12.2055	11.488	0	0	0	0	0	0	0	0	0	0	0	0	0	0	0	0	0	0	11.6829	0	11.1184	0	0	0	0
PTP4A1	0	0	0	0	10.423	9.68539	0	0	0	10.8322	0	10.7387	11.2667	9.16063	9.5912	0	0	0	0	0	0	0	0	0	0	0	0	9.03118	0	9.39264	0	0	0	0	0	0	0	11.459	10.4049	0	0	0	0	0	0	0	0	0	0
RAB1B	0	0	0	0	11.5138	9.54122	10.9199	0	11.0056	13.1525	0	11.9778	0	0	0	0	0	0	0	12.6267	11.6339	0	11.5789	11.2011	0	0	0	12.7399	0	12.3919	0	0	0	0	12.3156	10.8443	0	13.8027	12.7874	11.2646	0	10.3512	10.5942	0	9.60754	0	0	0	0
RAB21	0	0	0	0	11.9841	11.0068	0	0	0	12.6638	0	11.8071	9.6264	8.34864	7.15579	0	0	0	0	0	0	0	10.3004	11.4536	0	0	0	12.1299	10.3213	11.2562	0	0	0	0	11.8652	10.7055	0	12.9883	11.0541	11.5436	0	11.2451	11.9315	0	11.1871	0	0	0	0
RAB39A	0	0	0	0	10.253	9.7236	0	0	0	0	0	0	0	0	0	0	0	0	0	0	0	0	0	0	0	0	0	0	0	0	0	0	0	0	11.7157	10.6864	0	11.3655	11.4488	0	0	0	0	0	0	0	0	0	0
RAB5A	0	0	0	0	7.98939	9.05035	0	0	0	0	0	0	0	0	0	0	0	0	0	0	0	0	8.50397	8.91105	0	0	0	0	0	0	0	0	0	0	9.92581	8.7657	0	9.28193	10.7472	0	0	0	0	0	0	0	0	0	0
RAP1A	0	0	0	0	12.2935	7.36229	0	0	0	16.271	0	15.8699	0	0	0	0	0	0	0	0	0	0	12.1607	11.7026	0	0	0	12.0711	0	11.4579	0	0	0	0	8.02663	9.74586	0	8.15325	8.11064	0	0	0	0	0	0	0	0	0	0
RAVER1	0	0	0	0	9.02597	9.2464	0	0	0	0	0	0	0	0	0	0	0	0	0	0	0	0	0	0	0	0	0	0	0	0	0	0	0	0	9.89275	10.1027	0	9.77832	9.07054	0	0	0	0	0	0	0	0	0	0
RBX1	0	0	0	0	11.2954	9.84326	0	0	0	10.8544	0	10.3972	0	0	0	0	0	0	0	0	0	0	0	0	0	0	0	0	0	0	0	0	0	0	11.4349	10.1434	0	11.6195	11.0041	0	0	0	0	0	0	0	0	0	0
REEP6	0	0	0	0	10.8754	10.3232	0	0	0	0	0	0	0	0	0	0	0	0	0	0	0	0	11.2867	10.8856	0	0	0	0	0	0	0	0	0	0	11.5813	10.4754	0	10.813	10.566	0	0	0	0	0	0	0	0	0	0
RIOK2	0	0	0	0	10.3419	8.78524	0	0	0	10.1933	0	10.2278	0	0	0	0	0	0	0	0	0	0	0	0	0	0	0	9.71947	7.66896	9.14614	0	0	0	0	0	0	0	10.2057	10.4516	10.6236	0	10.6562	0	0	0	0	0	0	0
RPL11	0	0	0	0	11.5087	10.1395	0	0	0	0	0	0	0	0	0	0	0	0	0	0	0	0	0	0	0	0	0	0	0	0	0	0	0	0	0	0	0	0	0	0	0	0	0	0	0	0	0	0	0
RPL39P5	0	0	0	0	8.98155	8.6723	0	0	0	0	0	0	10.9745	9.2499	10.1122	12.0474	7.85337	10.0125	10.2085	9.83347	9.07553	0	10.5289	10.398	12.3939	10.6262	0	10.1772	0	9.57834	0	0	0	0	10.1551	9.80657	10.966	10.1402	10.1684	10.7476	0	10.803	11.8047	0	10.2193	0	0	0	0
RTF1	0	0	0	0	10.1206	9.15116	0	0	0	0	0	0	0	0	0	0	0	0	0	0	0	0	0	0	0	0	0	0	0	0	0	0	0	0	10.2227	9.07237	0	10.4079	9.50512	0	0	0	0	0	0	0	0	0	0
S100A13	0	0	0	0	11.2076	10.9607	0	0	0	12.3032	0	12.0921	0	12.5304	11.9261	0	12.9091	11.3553	0	12.1948	11.3621	0	12.6886	12.1051	11.389	12.0968	12.2829	11.6162	12.4993	12.4319	0	0	0	0	0	0	0	0	0	0	0	0	12.4221	0	11.5884	0	0	0	0
S100A7	0	0	0	0	12.8695	12.3373	0	0	0	0	0	0	0	0	0	0	0	0	0	0	0	0	0	0	0	0	0	0	0	0	0	0	0	0	0	0	0	0	0	0	0	0	0	0	0	0	0	0	0
S100A8	0	0	0	0	11.1011	11.1102	0	0	0	0	0	0	0	0	0	0	0	0	0	0	0	0	0	0	0	0	0	0	0	0	0	0	0	0	0	0	0	0	0	0	0	0	0	0	0	0	0	0	0
SAE1	0	0	0	0	11.0334	10.7179	0	0	0	12.6399	0	11.2894	0	0	0	0	0	0	0	10.5249	10.7581	0	12.1933	11.8993	0	0	0	0	0	0	0	0	0	0	0	0	0	11.4551	10.583	10.9127	0	9.95793	11.2438	0	11.4212	0	0	0	0
SARNP	0	0	0	0	10.2305	9.25339	0	11.8169	9.33355	0	0	0	9.46172	10.3247	9.14004	9.13321	11.4737	10.0921	0	0	0	0	0	0	9.17881	10.6476	11.7504	16.4104	11.8285	15.5387	10.4413	12.4251	12.4198	0	9.82491	8.78571	0	8.79108	9.78766	0	0	0	0	0	0	9.67781	12.8566	12.1574	10.3398
SDHB	0	0	0	0	8.99336	8.20149	0	0	0	7.00534	0	9.64723	0	0	0	0	0	0	0	0	0	0	0	0	0	0	0	14.3328	0	12.9088	0	0	0	0	10.2255	8.78029	0	12.2948	12.6287	0	0	0	0	0	0	0	0	0	0
SFXN1	0	0	0	0	8.54179	8.68143	0	10.2776	9.16394	11.3232	0	11.5363	0	0	0	0	0	0	0	0	0	0	0	0	0	0	0	15.7489	7.86171	13.8103	0	0	0	0	11.4141	10.9627	0	13.5309	12.2465	0	0	0	0	0	0	0	11.4365	8.12226	0
SLC25A1	0	0	0	0	11.2167	9.9765	0	0	0	13.995	0	12.5223	0	0	0	0	0	0	0	0	0	0	0	0	0	0	0	13.397	5.79792	11.8796	0	0	0	0	13.2085	12.0464	0	14.3231	13.5599	10.2666	0	9.4043	0	0	0	0	0	0	0
SLC25A13	0	0	0	0	8.46207	8.2703	0	0	0	10.1289	0	11.5662	0	0	0	0	0	0	0	0	0	0	5.96582	3.77587	0	0	0	16.1554	0	14.3114	0	0	0	0	10.1009	11.1343	0	13.7907	13.0159	10.4115	0	8.18043	6.11721	0	4.35864	0	0	0	0
SLC25A24	0	0	0	0	7.97039	7.16631	0	0	0	0	0	0	0	0	0	0	0	0	0	0	0	0	0	0	0	0	0	13.8449	0	12.9576	0	0	0	0	11.0596	9.01905	0	11.7351	12.4767	0	0	0	0	0	0	0	0	0	0
SLC39A7	0	0	0	0	11.3715	9.801	0	0	0	9.78506	0	9.23869	0	0	0	0	0	0	0	0	0	0	0	0	0	0	0	0	0	0	0	0	0	0	11.5477	10.3893	0	11.839	11.2931	0	0	0	0	0	0	0	0	0	0
SMN1	0	0	0	0	9.27569	8.48657	0	0	0	11.4033	0	9.89704	0	0	0	0	0	0	0	0	0	0	11.537	10.0511	0	0	0	0	0	0	0	0	0	0	0	0	0	10.5631	9.27415	0	0	0	0	0	0	0	0	0	0
SMS	0	0	0	0	9.45484	9.43903	12.5362	0	10.2836	11.4407	0	11.6021	0	0	0	0	0	0	0	11.9832	10.4645	0	12.9609	12.6783	0	0	0	0	0	0	0	0	0	0	9.3212	10.1104	0	9.91507	11.13	12.4407	0	11.6424	13.2191	0	12.7705	0	0	0	0
SMTN	0	0	0	0	12.6653	12.4221	0	0	0	13.2668	0	13.6061	0	0	0	0	0	0	0	0	0	0	0	0	0	0	0	0	0	0	0	0	0	0	14.0345	13.6889	0	14.4008	14.7752	0	0	0	0	0	0	0	0	0	0
SNX3	0	0	0	0	10.1983	9.66873	0	0	0	0	0	0	0	0	0	0	0	0	0	0	0	0	0	0	0	0	0	0	0	0	0	0	0	0	0	0	0	0	0	0	0	0	0	0	0	0	0	0	0
SNX6	0	0	0	0	9.43264	10.8238	0	0	0	0	0	0	0	0	0	0	0	0	0	0	0	0	11.2955	10.5293	0	0	0	0	0	0	0	0	0	0	11.1179	9.21015	0	11.4843	9.6004	0	0	0	10.9864	0	10.2088	0	0	0	0
SOAT1	0	0	0	0	10.5978	9.7384	0	0	0	0	0	0	0	0	0	0	0	0	0	0	0	0	0	0	0	0	0	0	0	0	0	0	0	0	11.9227	10.5779	0	12.227	10.8085	0	0	0	0	0	0	0	0	0	0
STAT1	0	0	0	0	7.67334	10.8343	0	0	0	9.77694	0	9.42319	0	0	0	0	0	0	0	10.9938	9.62998	0	12.4299	12.7163	0	0	0	0	0	0	0	0	0	0	8.607	7.09165	0	9.71685	8.71306	11.4605	0	10.1998	12.9342	0	11.3818	0	0	0	0
STK26	0	0	0	0	10.1435	9.24152	0	0	0	0	0	0	0	0	0	0	0	0	0	0	0	0	0	0	10.9434	11.029	10.177	11.1305	10.7084	10.9548	0	0	0	0	10.3781	11.0474	0	12.3737	10.5081	0	0	0	0	0	0	0	0	0	0
STOML2	0	0	0	0	10.4643	8.99161	0	0	0	13.5124	0	11.9571	0	0	0	0	0	0	0	0	0	0	0	0	0	0	0	12.0727	0	9.45336	0	0	0	0	12.4601	11.7548	0	14.0435	13.7516	0	0	0	0	0	0	0	0	0	0
SWAP70	0	0	0	0	11.4538	11.1593	11.5813	12.8194	11.4248	0	0	0	0	10.4843	11.4907	11.6835	11.2749	11.1221	0	11.553	11.824	0	12.5302	12.4229	0	11.2936	11.9717	12.7044	11.405	12.051	0	14.308	11.7512	0	0	0	0	0	0	11.8677	0	12.0601	11.9001	0	11.3131	7.94533	12.6527	12.7375	0
TFB2M	0	0	0	0	10.2907	10.2137	0	0	0	0	0	0	0	0	0	0	0	0	0	0	0	0	0	0	0	0	0	0	0	0	0	0	0	0	10.4722	10.5274	0	10.3986	10.3923	0	0	0	0	0	0	0	0	0	0
TIMM23	0	0	0	0	8.6723	7.67447	0	0	0	10.8712	0	11.2257	0	0	0	0	0	0	0	0	0	0	0	0	0	0	0	11.8037	0	10.2236	0	0	0	0	10.2226	12.005	0	0	0	0	0	0	0	0	0	0	0	0	0
TMED1	0	0	0	0	11.1555	8.16649	0	0	0	0	0	0	0	0	0	0	0	0	0	0	0	0	0	0	0	0	0	0	0	0	0	0	0	0	10.1759	8.44735	0	10.4045	9.84936	0	0	0	0	0	0	0	0	0	0
TMPO	0	0	0	0	7.2076	9.86839	0	14.4149	12.9341	0	0	0	0	11.1266	11.4473	10.46	12.6747	11.728	0	0	0	0	0	0	0	12.3857	13.0069	15.898	14.6818	15.4573	14.4594	15.1803	14.6802	0	11.2795	12.0896	0	11.8298	10.6282	0	0	0	0	0	0	13.1419	13.776	14.0092	11.9038
TOMM22	0	0	0	0	10.2395	9.37805	0	0	0	0	0	0	0	0	0	0	0	0	0	0	0	0	0	0	0	0	0	13.6065	0	11.7925	0	0	0	0	13.2207	12.7611	0	10.3843	14.7725	11.9975	0	10.7806	0	0	0	0	0	0	0
TTI2	0	0	0	0	11.5845	9.83027	0	0	0	10.761	0	10.97	0	0	0	0	0	0	0	11.12	10.2247	0	0	0	0	0	0	0	0	0	0	0	0	0	12.068	10.7662	0	11.5074	10.6858	0	0	0	0	0	0	0	0	0	0
TUBB4A	0	0	0	0	12.6097	11.6578	0	0	0	0	0	0	0	0	0	0	0	0	0	0	0	11.1867	10.6251	10.3359	0	0	0	12.9184	9.93424	11.4153	0	0	0	0	12.979	12.5452	7.82024	12.6251	13.0231	0	0	0	0	0	0	0	10.7662	10.9713	0
TXNDC5	0	0	0	0	9.01105	7.90379	0	0	0	10.508	0	9.93449	0	0	0	0	0	0	0	13.3491	12.0303	0	13.8195	14.1766	0	0	0	0	0	0	0	0	0	0	8.30784	7.59156	0	9.64472	11.4244	11.8257	0	10.4981	13.4919	0	12.3619	0	0	0	0
UBE2Z	0	0	0	0	10.3599	10.1199	12.2145	0	10.6495	12.5756	0	11.0944	0	0	0	0	0	0	0	11.2255	10.5299	0	12.4139	12.267	0	0	0	8.80111	0	8.13809	0	0	0	0	0	0	0	11.2594	11.5505	12.6695	0	11.1949	13.0188	0	11.9941	0	0	0	0
UBR4	0	0	0	0	9.29622	10.0208	0	0	0	0	0	0	0	0	0	0	0	0	0	0	0	0	11.4565	11.446	11.0645	9.93614	0	10.5219	11.046	9.27944	0	0	0	0	10.6359	9.43424	0	11.0599	10.7296	10.819	0	10.8234	12.1374	0	10.8969	0	0	0	11.3828
UQCRFS1	0	0	0	0	10.1329	10.0876	0	0	0	11.9454	0	12.456	0	0	0	0	0	0	0	0	0	0	9.61152	8.6407	0	0	0	11.8377	0	9.40382	0	0	0	0	12.0553	11.587	0	13.2826	13.1102	10.0323	0	9.12388	9.39745	0	8.25321	0	0	0	0
VDAC3	0	0	0	0	11.0488	10.343	0	0	0	12.9698	0	12.4363	0	0	0	0	0	0	0	0	0	0	0	0	0	0	0	13.4803	0	12.3098	0	0	0	0	13.5507	12.8256	0	14.5328	14.183	12.3938	0	10.4439	0	0	0	0	0	0	0
VPS25	0	0	0	0	11.622	10.5522	0	0	0	0	0	0	0	9.10559	10.3622	9.44832	10.2961	10.4055	0	0	0	0	10.9066	9.38397	0	0	0	0	0	0	0	0	0	0	11.212	10.5801	0	11.8589	10.9811	0	0	0	0	0	0	11.2515	10.0359	10.3574	0
VPS26A	0	0	0	0	9.45609	8.86416	0	0	0	11.8207	0	11.1806	0	0	0	0	0	0	0	11.8526	10.6171	0	12.887	12.4794	0	0	0	0	0	0	0	0	0	0	0	0	0	11.8445	11.7345	11.9947	0	10.4918	12.2829	0	11.2356	0	0	0	0
VPS35	0	0	0	0	9.30163	8.19042	12.3865	0	10.1386	12.5535	0	11.6797	0	0	0	0	0	0	0	12.8313	12.1732	0	14.2075	13.5579	0	0	0	10.6829	8.33168	10.4339	0	0	0	0	11.172	10.1625	0	12.8919	12.0982	13.088	12.0704	11.5852	13.4279	0	12.6176	0	0	0	0
ZGPAT	0	0	0	0	11.6012	10.3222	0	0	0	14.6082	0	11.4848	0	0	0	0	0	0	0	0	0	0	0	0	0	0	0	0	0	0	0	0	0	0	12.0584	10.9588	0	0	0	0	0	0	0	0	0	0	0	0	0
ZNF841	0	0	0	0	12.3605	11.9912	0	0	0	0	0	0	0	0	0	0	0	0	0	0	0	0	0	0	0	0	0	0	0	0	0	0	0	0	0	0	0	11.3589	12.5425	0	0	0	0	0	0	0	0	0	0
ACTB	0	0	0	0	0	0	20.6326	18.6169	20.1064	19.2025	18.5116	20.3764	0	0	0	0	20.3409	19.2957	18.1614	20.1405	19.9785	0	0	0	0	0	0	0	0	0	0	0	0	0	0	0	0	0	0	20.2261	19.3818	20.2119	20.1615	19.0649	19.6712	0	0	0	0
ACTC1	0	0	0	0	0	0	20.8004	18.5415	20.6514	19.4635	18.7182	20.5082	0	0	0	0	0	0	0	0	0	0	0	0	0	0	0	0	0	0	0	0	0	0	0	0	0	0	0	20.115	19.1067	20.2927	20.4377	19.3273	20.6591	0	0	0	0
ACTG1	0	0	0	0	0	0	22.0207	20.425	21.6853	20.2968	20.6999	20.9694	0	0	0	20.4699	21.933	21.2988	20.0026	21.2584	21.4689	0	0	0	0	0	0	0	0	0	0	0	0	0	0	0	0	0	0	21.2596	21.3206	21.3769	21.1038	20.4741	21.5386	0	0	0	21.489
ACTL6A	0	0	0	0	0	0	9.15127	9.78872	9.44157	0	0	0	0	8.91976	7.92478	0	11.8268	10.3244	0	0	0	0	0	0	9.42115	11.0492	13.0614	14.7956	9.64962	12.8804	0	0	0	0	0	0	0	0	0	0	0	0	0	0	0	6.90857	10.5895	9.89357	9.5745
ACTL8	0	0	0	0	0	0	14.9151	16.1762	15.1207	0	0	0	15.5435	16.2681	16.039	15.8189	16.4065	15.9596	0	0	0	0	0	0	0	0	0	0	0	0	0	0	0	0	0	0	0	0	0	15.1625	16.8548	15.7124	14.6981	16.2363	15.3277	16.2304	15.3626	15.6578	16.1324
ACTR2	0	0	0	0	0	0	15.1852	14.9578	15.1423	15.534	14.9622	16.133	15.3455	15.4891	15.3664	15.3694	16.2845	15.8459	12.869	16.0891	15.8109	0	0	0	14.1098	15.5418	16.0603	14.3906	16.1238	15.6628	15.4516	15.4852	15.2886	0	0	0	0	0	0	15.3152	15.3216	15.5383	16.162	15.1684	16.1777	15.919	15.4882	15.6057	15.9748
ADK	0	0	0	0	0	0	11.4229	0	9.94224	0	0	0	0	0	0	0	0	0	0	11.5106	10.5355	0	12.54	12.0385	0	0	0	0	0	0	0	0	0	0	0	0	0	0	0	0	0	0	11.5834	0	11.705	0	0	0	0
AK4	0	0	0	0	0	0	12.4308	0	12.4315	10.5774	0	10.1864	0	0	0	0	0	0	0	0	0	0	10.4983	10.2789	0	0	0	0	0	0	0	0	0	0	11.9292	9.48993	0	0	0	12.5142	0	10.1764	11.7354	0	10.0351	0	0	0	0
APEH	0	0	0	0	0	0	12.602	0	10.2812	11.7816	0	11.2847	0	0	0	0	0	0	0	12.8606	12.1635	0	14.0151	14.012	0	0	0	0	0	0	0	0	0	0	0	0	0	11.9454	11.2911	12.1474	0	11.0907	12.9337	0	12.9533	0	0	0	0
APRT	0	0	0	0	0	0	11.7327	0	10.4946	11.091	0	11.4719	0	0	0	0	11.737	10.3978	0	11.9992	12.5846	0	13.7496	13.268	0	0	0	0	0	0	0	0	0	0	0	0	0	10.7512	10.6921	12.1873	0	10.5891	13.3771	0	11.9204	0	0	0	0
ARF5	0	0	0	0	0	0	11.353	0	10.3565	0	0	0	0	0	0	0	0	0	0	11.3583	10.3642	0	11.3023	12.0472	0	0	0	0	0	0	0	0	0	0	0	0	0	0	0	9.56487	0	10.5897	11.9993	0	11.6228	0	0	0	0
ARFGAP1	0	0	0	0	0	0	10.7004	0	9.54225	9.80824	0	9.91824	0	0	0	0	0	0	0	11.4477	10.8804	0	11.5435	11.753	0	0	0	9.94279	0	9.78334	0	0	0	0	0	0	0	11.8318	10.7632	0	0	0	10.7018	0	10.9767	0	0	0	0
ARPC3	0	0	0	0	0	0	14.8226	14.2412	14.6885	15.2511	14.0417	15.6516	14.479	15.0556	14.9366	14.4018	15.7428	15.209	0	0	0	0	0	0	0	0	0	14.465	15.4184	15.0141	0	0	0	0	0	0	0	0	0	14.8225	14.772	15.1607	15.3573	14.4161	15.4156	15.405	14.9325	15.2476	15.4484
C1QBP	0	0	0	0	0	0	12.1428	15.0287	13.5411	13.1523	16.3215	13.9905	16.0423	15.4454	15.6508	15.0079	11.2449	14.3611	0	0	0	0	13.8635	13.2346	14.5533	14.1774	14.3664	14.5155	15.7116	15.2947	11.6252	14.8638	14.0918	0	0	0	0	14.5356	14.1271	13.0469	14.8639	13.5739	13.2963	15.4438	13.9718	14.8728	16.1476	15.7819	15.3311
CAP1	0	0	0	0	0	0	14.3559	11.6754	13.7923	0	0	0	0	0	0	0	0	0	0	0	0	0	0	0	0	0	0	0	0	0	0	0	0	0	0	0	0	0	0	13.5871	12.7031	13.9439	14.5109	12.2601	14.4325	0	0	0	0
CFL2	0	0	0	0	0	0	12.0608	0	10.3029	10.2831	0	12.3575	0	11.317	10.3143	9.78851	13.0496	11.4384	0	12.2869	10.6185	0	13.2696	13.0474	0	10.0302	11.7601	0	11.4719	10.1759	0	0	0	0	11.4889	8.38211	0	10.0064	10.8019	12.8944	11.908	12.1121	13.3369	0	12.4104	11.5227	8.67225	10.7772	10.1534
CNN2	0	0	0	0	0	0	17.3536	13.7671	16.5518	16.8287	12.8132	17.3707	0	0	0	0	0	0	0	0	0	0	0	0	0	0	0	0	0	0	0	0	0	0	0	0	0	0	0	0	0	0	17.715	13.9635	17.3676	0	0	0	0
CNN3	0	0	0	0	0	0	17.98	15.8648	17.6364	0	0	0	0	0	0	0	0	0	0	0	0	0	0	0	0	0	0	0	0	0	0	0	0	0	0	0	0	0	0	0	0	0	17.7139	15.8378	18.648	0	0	0	0
COPA	0	0	0	0	0	0	17.1602	17.1167	16.9999	17.6469	16.701	17.2042	0	0	0	0	0	0	15.2911	18.4164	18.1959	0	0	0	0	0	0	0	0	0	0	0	0	17.9708	17.2251	16.8723	0	0	0	0	0	0	17.1536	17.0577	17.0858	0	0	0	0
COPB2	0	0	0	0	0	0	18.8069	19.0245	18.7165	18.2661	18.89	18.3887	17.7927	19.2845	18.9211	0	0	0	17.1176	19.6682	19.4947	0	0	0	0	0	0	0	0	0	0	0	0	19.251	18.1269	18.3234	0	0	0	18.7459	18.5278	18.7224	18.4463	18.9446	18.5347	0	0	0	19.3622
COPG2	0	0	0	0	0	0	14.8818	13.8968	14.5214	14.6929	13.4776	14.733	0	0	0	0	0	0	8.75272	16.2725	16.1538	6.71466	15.3474	15.3947	0	0	0	0	0	0	0	0	0	14.589	14.4175	14.4699	0	0	0	15.0003	13.241	14.6457	14.2554	14.0721	14.24	0	0	0	0
COPZ1	0	0	0	0	0	0	17.802	17.7885	17.7529	17.0257	17.8132	16.7539	16.8779	18.1868	18.0429	0	0	0	16.2725	18.2091	18.0797	0	0	0	0	0	0	0	0	0	0	0	0	0	0	0	0	0	0	16.8334	17.5431	17.0704	0	0	0	0	0	0	18.3938
CORO1B	0	0	0	0	0	0	15.5103	13.8855	15.0887	14.8919	13.4126	15.3599	0	0	0	14.2417	15.4851	14.909	0	16.0121	15.8493	0	15.7499	15.6266	0	0	0	0	0	0	0	0	0	0	0	0	0	0	0	15.7628	14.6217	15.6778	15.9934	13.2978	15.439	0	0	0	15.0184
DBN1	0	0	0	0	0	0	16.3469	6.60702	15.6366	17.2772	12.4918	17.7156	0	0	0	0	0	0	10.238	17.0878	17.4286	0	16.4683	16.2244	0	0	0	0	0	0	0	0	0	0	0	0	0	0	0	16.5956	10.2308	16.1438	17.0519	12.9771	16.5038	0	0	0	0
DCXR	0	0	0	0	0	0	11.3688	0	10.9298	12.2848	0	10.6633	0	0	0	0	0	0	0	10.9731	10.1466	0	11.5122	11.6066	0	0	0	0	0	0	0	0	0	0	0	0	0	11.7571	10.5398	10.7044	0	10.1255	11.3718	0	11.1277	0	0	0	0
DDAH1	0	0	0	0	0	0	11.8045	0	10.282	9.97823	0	10.6883	0	0	0	0	0	0	0	12.2079	9.00364	0	13.3807	13.098	0	0	0	0	0	0	0	0	0	0	0	0	0	9.88834	10.2752	11.4436	0	10.3503	12.216	0	11.8488	0	0	0	0
DENR	0	0	0	0	0	0	14.2754	12.2232	13.3637	14.696	11.0844	14.8919	0	0	0	0	0	0	0	0	0	0	0	0	0	0	0	0	0	0	0	0	0	0	0	0	0	0	0	0	0	0	0	0	0	0	0	0	0
DNM1L	0	0	0	0	0	0	14.6411	0	13.5412	14.2462	0	14.3134	0	0	0	0	0	0	0	12.8884	12.1141	0	12.9441	12.5109	0	0	0	0	0	0	0	0	0	0	0	0	0	9.19138	8.61539	14.3059	0	13.8326	14.0209	5.16438	13.6862	0	0	0	0
DSP	0	0	0	0	0	0	15.7506	10.7331	14.8391	14.9863	0	14.9407	0	0	0	0	0	0	0	0	0	0	0	0	0	0	0	14.3782	11.2638	13.3705	0	0	0	0	14.0921	14.4608	0	13.6388	13.3123	16.4065	9.78323	16.1598	15.7765	10.3948	15.8204	0	0	0	0
DYSF	0	0	0	0	0	0	14.0358	0	13.049	12.9001	0	15.5815	0	0	0	0	0	0	0	12.0502	11.2574	0	11.4406	10.2892	0	0	0	0	0	0	0	0	0	0	8.73821	10.3483	0	9.43385	12.4679	14.1064	0	13.7871	13.5874	0	13.2012	0	0	0	0
ECI1	0	0	0	0	0	0	11.7073	0	9.82078	0	0	0	0	0	0	0	0	0	0	12.1878	11.2244	0	11.6412	13.1101	0	0	0	0	0	0	0	0	0	0	0	0	0	0	0	0	0	0	12.2818	0	11.4535	0	0	0	0
EEF2	0	0	0	0	0	0	15.3556	13.4599	15.0412	14.9227	13.0133	15.241	0	0	0	0	0	0	15.1392	15.072	15.1304	15.2418	15.6479	15.5316	14.6915	14.2978	13.7524	0	0	0	0	0	0	0	0	0	13.653	14.5297	14.3645	15.3702	13.7451	15.0794	15.0418	13.6199	15.5814	0	0	0	0
EIF3K	0	0	0	0	0	0	16.0112	16.5192	15.9169	0	0	0	17.2018	17.1885	16.845	17.1063	17.3967	16.8545	0	0	0	0	0	0	16.2122	16.9308	17.491	0	0	0	16.6625	17.4804	16.6864	0	0	0	0	0	0	16.0097	17.1107	16.1374	0	0	0	16.9678	16.9133	16.4504	17.2321
ERO1A	0	0	0	0	0	0	10.9962	0	9.72042	8.87552	0	8.4386	0	0	0	0	0	0	0	12.2364	11.1822	0	12.9915	13.4269	0	0	0	0	0	0	0	0	0	0	0	0	0	8.60147	9.87929	9.00654	0	9.70756	12.405	0	10.9725	0	0	0	0
FH	0	0	0	0	0	0	12.7493	0	11.2753	11.811	0	9.24492	0	0	0	8.61787	9.88087	9.36113	0	12.0485	11.442	0	13.333	13.6211	0	0	0	0	0	0	0	0	0	0	10.1563	11.0733	0	10.607	11.9117	11.8191	0	12.1265	13.7807	0	13.2397	8.51416	0	9.38361	0
FIG4	0	0	0	0	0	0	19.2463	16.0389	18.4433	20.683	18.4316	20.2039	0	0	0	16.3759	19.0324	18.1672	0	0	0	0	0	0	0	0	0	0	0	0	0	0	0	0	0	0	0	0	0	19.9864	17.6978	19.3791	19.9123	16.4848	20.037	0	0	0	0
FLNA	0	0	0	0	0	0	19.5312	16.1684	18.965	18.9047	15.2484	19.3673	0	0	0	0	0	0	13.0946	18.252	18.031	0	0	0	0	0	0	0	0	0	0	0	0	0	0	0	0	0	0	19.353	15.4395	19.0412	18.8242	16.6431	18.7825	0	0	0	0
GGCT	0	0	0	0	0	0	13.7964	0	14.2192	12.6896	0	13.4641	0	0	0	0	0	0	0	14.4054	13.7167	0	14.7443	16.1553	0	0	0	13.4401	14.1483	14.2557	0	0	0	0	0	0	0	0	0	14.0896	0	13.7518	14.9989	0	14.515	0	0	0	0
GLRX3	0	0	0	0	0	0	11.1889	0	11.2091	0	0	0	0	0	0	8.46095	10.6188	9.99692	0	11.4541	11.5032	0	13.1944	12.7083	0	0	0	0	0	0	0	0	0	0	0	0	0	11.7567	9.62347	9.09802	0	10.1062	12.5418	0	12.0265	0	0	0	0
GMDS	0	0	0	0	0	0	10.3912	0	10.2321	0	0	0	0	0	0	10.5782	8.86456	10.1536	0	10.9876	10.6275	0	11.6881	11.9132	0	0	0	0	0	0	0	0	0	0	0	0	0	0	0	7.61237	0	9.71212	11.2904	0	10.9428	0	11.7433	10.8539	0
GNPDA1	0	0	0	0	0	0	11.907	0	9.59515	0	0	0	0	0	0	0	0	0	0	12.0529	11.5427	0	12.8547	13.4778	0	0	0	0	0	0	0	0	0	0	0	0	0	8.50122	7.48176	11.1395	0	11.0757	12.1636	0	12.0731	0	0	0	0
GPATCH11	0	0	0	0	0	0	13.2781	17.5815	16.0753	0	0	0	15.262	14.211	14.7645	14.6739	14.2189	14.4215	16.8783	13.2088	14.9633	16.7054	0	13.5688	13.9758	15.0386	16.1405	12.4965	15.2229	15.3299	18.4909	14.237	16.6601	0	0	0	0	0	0	0	0	0	0	0	0	14.5548	15.0142	14.039	13.0163
GRPEL1	0	0	0	0	0	0	11.7457	0	10.594	10.6221	0	11.0642	0	0	0	0	0	0	0	11.4718	9.90536	0	12.9251	12.6621	0	9.43475	8.74695	11.2807	7.89936	9.25854	0	0	0	0	0	0	0	12.0036	10.5934	9.70641	10.5929	10.8295	12.3901	0	12.0349	0	0	0	0
GSR	0	0	0	0	0	0	11.6048	0	9.95977	12.5208	0	11.6416	0	0	0	0	0	0	0	11.6541	10.3216	0	13.0146	12.4401	0	0	0	0	0	0	0	0	0	0	10.3249	8.36389	0	11.4526	11.1479	11.7274	0	10.8779	12.6448	0	11.7832	0	0	0	0
HAT1	0	0	0	0	0	0	10.6381	0	11.0739	0	0	0	0	0	0	8.91394	10.8291	10.3465	0	12.3025	12.3749	0	12.9461	13.8536	9.2601	9.8117	10.4873	9.88204	8.90605	9.05001	0	0	0	0	0	0	0	0	0	12.1836	0	11.8015	10.4594	0	11.9472	0	0	0	0
HSPA9	0	0	0	0	0	0	16.0239	14.6559	15.4582	16.0865	14.7502	15.4582	0	0	0	15.369	15.4626	15.3247	14.6211	15.5583	15.4232	14.4347	16.2823	16.082	14.8633	15.2208	15.5639	0	0	0	0	0	0	0	0	0	0	0	0	15.8053	15.2071	15.7443	16.4674	14.3317	16.3219	15.5467	15.2984	15.4097	15.5111
HSPE1	0	0	0	0	0	0	14.4138	14.1653	14.1361	0	0	0	0	0	0	14.1491	15.2277	14.8126	14.2802	14.6799	14.7674	15.1191	14.1007	15.5596	15.0387	15.0289	15.0078	0	0	0	14.865	14.7694	14.9372	0	0	0	0	0	0	0	0	0	14.8251	14.4399	15.1754	15.3327	14.6057	15.0974	14.8187
IDE	0	0	0	0	0	0	12.4293	0	10.9112	12.6504	0	12.8899	0	0	0	0	0	0	0	0	0	0	11.8672	13.4372	0	0	0	0	0	0	0	0	0	0	0	0	0	14.0939	12.4165	0	0	0	13.8638	0	12.5158	0	0	0	0
LAD1	0	0	0	0	0	0	15.871	14.1006	15.2172	17.7246	11.9385	17.2427	0	0	0	0	0	0	11.7972	15.6584	15.2198	12.214	15.174	14.7536	0	0	0	15.0806	11.9298	14.1281	0	0	0	0	0	0	0	0	0	15.662	12.1843	15.4519	16.0238	12.1708	15.5492	0	0	0	0
LANCL1	0	0	0	0	0	0	10.028	0	10.5932	0	0	0	10.8611	11.4493	11.0045	10.041	10.7645	10.7262	0	11.5021	11.0318	0	0	0	10.95	11.4076	11.1389	10.7746	10.9087	11.0022	0	0	0	0	0	0	0	0	0	0	0	0	0	0	0	11.3262	11.1441	11.1827	11.0632
LAP3	0	0	0	0	0	0	11.3202	0	9.6375	9.61069	0	9.80524	0	0	0	0	0	0	0	10.8565	9.2997	0	13.2371	12.5973	0	0	0	0	0	0	0	0	0	0	8.06007	8.94325	0	10.7257	10.5279	11.6222	0	10.3801	13.0469	0	11.5325	0	0	0	0
MCCC2	0	0	0	0	0	0	11.1465	0	11.1706	12.2274	0	11.4088	0	0	0	9.32303	9.04887	9.24065	0	11.1936	10.0752	0	12.2059	12.3399	10.2569	10.1019	10.9458	10.32	10.2708	10.8281	0	0	0	0	10.104	9.67873	0	10.9507	11.4156	12.4107	0	12.1956	12.7646	0	12.4566	10.2279	0	9.79433	0
MRPS10	0	0	0	0	0	0	12.4186	0	12.6001	0	0	0	0	0	0	11.5915	13.0242	11.0151	0	0	0	0	0	0	0	0	0	0	0	0	0	0	0	0	0	0	0	13.6215	12.3597	0	0	0	0	0	0	9.72004	12.8201	11.6855	0
NACA	0	0	0	0	0	0	15.6105	13.2379	14.8653	0	0	0	0	0	0	0	0	0	0	0	0	0	15.0704	14.9603	0	0	0	0	0	0	0	0	0	0	0	0	0	0	0	15.5412	13.2345	15.1666	15.5495	13.7495	15.2826	0	0	0	0
NAPA	0	0	0	0	0	0	11.0134	0	10.784	0	0	0	0	9.25052	8.65227	10.7628	9.57924	10.1628	0	0	0	0	11.4858	10.9953	8.1335	9.63918	9.93483	14.0722	7.77156	12.3848	0	0	0	0	0	0	0	9.36064	10.9626	11.3564	0	11.2305	11.9491	0	11.5023	0	0	0	0
NELFB	0	0	0	0	0	0	14.7495	15.0624	15.025	0	0	0	0	0	0	0	0	0	0	0	0	0	0	0	0	0	0	0	0	0	0	0	0	0	0	0	0	0	0	0	0	0	0	0	0	0	0	0	0
NPEPPS	0	0	0	0	0	0	11.0858	0	10.0303	9.34239	0	8.35021	0	0	0	0	0	0	0	12.2007	11.3098	0	13.1189	13.4144	0	0	0	0	0	0	0	0	0	0	0	0	0	9.79223	9.16349	9.74948	0	10.1457	12.8731	0	12.1687	0	0	0	0
NUTF2	0	0	0	0	0	0	13.0735	0	9.55833	11.2873	0	11.5592	0	0	0	0	0	0	0	12.9023	12.1598	0	14.4969	13.9221	0	0	0	11.2852	0	9.1513	0	0	0	0	0	0	0	0	0	11.6322	0	12.3148	12.7254	0	13.0548	0	0	0	0
OAT	0	0	0	0	0	0	13.6239	0	12.0827	12.793	0	11.7188	0	0	0	0	0	0	0	12.3401	11.7692	8.0847	13.8039	13.4142	0	0	0	0	0	0	0	0	0	0	0	0	0	0	0	13.345	0	12.4578	13.8474	0	13.6111	0	0	0	0
PDLIM2	0	0	0	0	0	0	13.0808	0	12.8372	11.809	0	10.6924	0	0	0	0	0	0	0	14.2416	13.2246	0	11.6976	12.5428	0	0	0	0	0	0	0	0	0	0	0	0	0	0	0	12.0956	0	12.5779	13.5931	0	13.6411	0	0	0	0
PLEC	0	0	0	0	0	0	15.692	8.11805	15.1831	15.2226	5.4705	15.3127	0	0	0	0	0	0	0	14.8638	14.8503	0	14.0078	14.1964	0	0	0	0	0	0	0	0	0	0	14.357	14.2693	5.15036	14.2029	13.9408	16.3118	4.63946	16.1981	15.939	11.4687	15.9292	0	0	0	0
PMM2	0	0	0	0	0	0	10.4936	11.0423	11.3267	12.58	11.0563	0	0	12.7328	11.593	10.5125	11.5484	11.2637	0	11.2853	11.2305	0	11.6441	11.4556	11.1442	11.3397	0	9.91477	11.9119	10.9973	0	0	0	0	0	0	0	0	0	0	0	0	11.6102	0	10.6911	0	0	0	11.7798
PMPCB	0	0	0	0	0	0	12.4747	0	11.0693	13.8439	0	12.9504	0	0	0	0	0	0	0	0	0	0	10.8546	9.84589	0	0	0	0	0	0	0	0	0	0	0	0	0	12.377	11.6469	13.5973	0	13.1236	13.4971	0	13.0911	0	0	0	0
PNP	0	0	0	0	0	0	11.1468	0	10.6392	10.4672	0	11.2491	0	0	0	0	0	0	0	11.8225	10.9921	0	13.6248	13.1287	0	0	0	0	0	0	0	0	0	0	0	0	0	9.18991	10.5689	11.6927	0	10.2656	13.1941	0	11.692	0	0	0	0
PPP2R2A	0	0	0	0	0	0	11.9759	0	12.0735	0	0	0	11.8474	11.3388	11.5019	11.6321	12.0207	12.0609	0	12.5712	12.4059	0	12.0071	13.0017	0	0	0	0	0	0	0	0	0	0	0	0	0	0	0	11.1428	0	11.239	11.7828	0	11.8368	12.0017	12.3024	12.4287	11.5678
PRDX2	0	0	0	0	0	0	14.7575	14.7073	14.5529	14.6854	14.967	14.4437	0	0	0	0	0	0	14.6657	15.798	15.4602	14.8407	16.0904	15.1248	0	0	0	0	0	0	0	0	0	0	0	0	0	0	0	0	0	0	0	0	0	0	0	0	0
PTPRS	0	0	0	0	0	0	17.3459	14.0643	15.9529	18.0384	11.7369	17.2499	0	0	0	0	0	0	0	16.0231	16.0204	0	0	0	0	0	0	0	0	0	0	0	0	0	17.4726	16.9563	10.5256	17.9263	18.0352	18.9247	12.9259	18.1249	17.9298	12.7853	17.3712	0	0	0	0
PYCR1	0	0	0	0	0	0	14.7202	14.6449	14.2654	0	0	0	0	0	0	0	0	0	0	0	0	0	0	0	0	0	0	14.8053	15.1607	15.1339	0	0	0	0	0	0	0	0	0	0	0	0	0	0	0	0	0	0	0
QDPR	0	0	0	0	0	0	11.1281	0	10.1923	0	0	0	0	0	0	0	0	0	0	0	0	0	12.8334	11.1106	0	0	0	0	0	0	0	0	0	0	0	0	0	0	0	11.3235	0	10.5866	11.7825	0	10.9782	0	0	0	0
RAB6A	0	0	0	0	0	0	14.8178	13.5398	14.5982	0	0	0	0	0	0	0	0	0	13.7164	14.4568	14.4627	0	0	0	14.5676	14.382	13.8271	15.7822	13.5333	15.129	0	0	0	0	0	0	0	0	0	0	0	0	0	0	0	0	0	0	0
RFC2	0	0	0	0	0	0	14.2552	0	12.7738	0	0	0	13.6937	11.9034	12.7967	12.8819	13.6349	13.188	0	13.6245	14.1887	0	0	0	11.3698	13.1656	13.1282	13.297	13.0343	13.0809	0	0	0	0	0	0	0	0	0	0	0	0	0	0	0	11.7973	13.7855	13.3982	0
RFLNA	0	0	0	0	0	0	12.926	0	10.9778	13.3892	0	13.6778	0	0	0	0	0	0	0	15.0109	14.2102	0	14.7451	14.3001	0	0	0	0	0	0	0	0	0	0	0	0	0	11.9257	11.5636	13.4616	0	12.9073	12.7749	0	12.5643	0	0	0	0
RSU1	0	0	0	0	0	0	10.8883	0	10.3812	0	0	0	0	0	0	0	0	0	0	0	0	0	0	0	0	0	0	12.9419	0	11.9527	0	0	0	0	0	0	10.7445	11.5291	10.5403	0	0	0	0	0	0	0	0	0	0
SLC25A10	0	0	0	0	0	0	13.3396	12.8423	12.7819	14.3196	0	13.3873	0	0	0	0	0	0	0	0	0	0	0	0	0	0	0	15.207	0	13.1772	15.5819	13.4588	11.3037	14.7728	13.1222	13.102	0	15.6301	15.1456	0	0	0	0	0	0	0	0	0	0
SRM	0	0	0	0	0	0	11.0381	0	9.38744	0	0	0	0	0	0	0	0	0	0	10.5795	9.86459	0	10.0889	11.4521	0	0	0	0	0	0	0	0	0	0	0	0	0	0	0	0	0	0	10.5134	0	11.2147	0	0	0	0
ST13	0	0	0	0	0	0	12.9351	0	12.9822	11.6074	0	10.5545	0	0	0	11.7135	11.9046	11.7196	0	13.3679	13.8052	0	13.458	14.801	12.6484	11.661	11.6316	12.836	8.10941	11.9665	0	0	0	0	10.5523	11.5658	0	12.5664	12.1197	10.702	0	12.8691	13.787	0	13.6412	11.3638	10.1675	11.0095	0
STIP1	0	0	0	0	0	0	15.6084	15.6255	15.5463	0	0	0	0	0	0	0	0	0	0	0	0	0	0	0	0	0	0	0	0	0	0	0	0	0	0	0	0	0	0	15.3625	15.9058	15.5542	16.127	15.4759	15.9805	0	0	0	0
TAGLN2	0	0	0	0	0	0	16.258	13.5716	15.9735	0	0	0	0	0	0	0	0	0	0	0	0	0	0	0	0	0	0	0	0	0	0	0	0	0	0	0	0	0	0	0	0	0	16.1493	13.8459	16.4005	0	0	0	0
TES	0	0	0	0	0	0	10.8448	0	10.6224	12.5637	0	10.6295	0	0	0	0	0	0	0	11.0672	11.2845	0	12.698	12.1799	0	0	0	0	0	0	0	0	0	0	0	0	0	12.2208	10.0806	10.3792	0	10.3003	12.443	0	11.4365	0	0	0	0
TLN1	0	0	0	0	0	0	11.5723	0	8.99219	10.5896	0	8.53021	0	6.30082	7.66363	0	8.68399	8.49951	0	11.8489	10.462	0	13.2712	12.8964	0	0	0	0	0	0	0	0	0	0	7.37665	7.37578	0	10.8866	9.42115	11.4925	0	10.8539	12.9474	0	11.9769	0	0	0	0
TMED5	0	0	0	0	0	0	13.3093	0	11.5068	10.813	0	12.4405	0	0	0	0	0	0	0	0	0	0	12.474	11.9942	0	0	0	0	0	0	0	0	0	0	0	0	0	0	0	13.122	0	12.9045	13.0045	0	12.8479	0	0	0	0
TMOD3	0	0	0	0	0	0	13.7058	13.8886	13.5484	14.8599	14.8404	14.3025	15.1933	15.6803	15.4426	14.9234	16.38	15.7135	13.8418	13.6281	13.5706	0	0	0	13.9628	15.4751	16.1541	14.1646	15.731	15.1604	13.9905	15.4353	15.1057	0	0	0	0	0	0	13.3041	14.769	13.7668	13.0434	14.1219	13.4153	15.2629	14.9803	15.1329	15.3662
TRAP1	0	0	0	0	0	0	12.933	0	12.5903	0	0	0	0	0	0	0	0	0	0	13.5138	12.7056	0	13.6583	14.4231	0	0	0	0	0	0	0	0	0	0	0	0	0	0	0	0	0	0	13.5328	0	14.1359	0	0	0	0
TRIM28	0	0	0	0	0	0	13.9077	11.5062	13.379	0	0	0	0	0	0	0	0	0	10.9929	13.9939	13.9629	11.6302	14.6672	14.144	13.9558	13.4612	13.1291	0	0	0	0	0	0	0	0	0	13.7324	13.0738	13.5735	13.8665	11.6437	13.892	13.7079	12.2292	14.0822	0	0	0	0
USP5	0	0	0	0	0	0	11.4584	0	9.38815	0	0	0	0	0	0	7.7038	8.72734	7.69787	0	12.4424	11.6825	0	14.2983	14.2636	0	0	0	0	0	0	0	0	0	0	8.56525	7.77063	0	10.6598	11.0518	10.5344	0	10.0611	13.4621	0	12.2779	0	0	0	0
VAMP8	0	0	0	0	0	0	9.44112	0	9.17245	0	0	0	0	0	0	0	0	0	0	0	0	0	9.38693	9.01603	0	0	0	0	0	0	0	0	0	0	0	0	0	0	0	0	0	0	9.32702	0	9.41215	0	0	0	0
VCL	0	0	0	0	0	0	10.2268	0	8.43035	8.10685	0	9.54874	0	10.9652	12.3255	11.4917	11.1362	10.4435	0	13.8772	13.2661	0	14.0136	14.0323	0	0	0	8.98551	11.1419	7.05128	0	0	0	0	6.93758	8.71793	0	7.59025	6.97688	10.5048	0	11.2494	13.4575	0	12.9884	0	0	0	0
YWHAB	0	0	0	0	0	0	14.8332	13.6931	14.9359	15.6093	14.1932	14.9425	0	0	0	0	0	0	14.8472	14.8571	14.8187	14.6217	15.2209	15.2534	15.0054	14.8454	14.2689	15.2782	14.0871	14.7783	0	0	0	0	0	0	13.0311	15.8445	14.7416	14.8147	13.6546	14.5587	15.5805	13.6165	14.802	0	0	0	0
YWHAE	0	0	0	0	0	0	16.2756	14.5245	15.6499	16.1772	15.1986	16.1775	0	0	0	0	0	0	15.3874	16.5456	16.2627	15.319	17.1341	16.8667	0	0	0	16.2161	15.3109	15.8607	0	0	0	0	0	0	0	0	0	0	0	0	16.7293	14.9255	16.4657	0	0	0	0
YWHAZ	0	0	0	0	0	0	15.819	13.7035	15.4395	0	0	0	0	0	0	0	0	0	14.4093	15.5187	15.3992	13.7152	16.3685	15.8702	0	0	0	0	0	0	0	0	0	0	0	0	0	0	0	15.6632	13.93	15.1207	16.0546	13.3853	15.7282	0	0	0	0
AASDHPPT	0	0	0	0	0	0	0	0	0	12.197	0	11.677	0	0	0	0	0	0	0	0	0	0	11.5364	10.4645	0	0	0	0	0	0	0	0	0	0	0	0	0	11.4573	10.4432	0	0	0	0	0	0	0	0	0	0
ABCF1	0	0	0	0	0	0	0	0	0	12.3854	0	12.4684	0	0	0	0	0	0	0	0	0	0	0	0	0	0	0	0	0	0	0	0	0	0	0	0	0	0	0	0	0	0	0	0	0	0	0	0	0
ACACA	0	0	0	0	0	0	0	0	0	9.68247	0	9.98187	0	0	0	0	0	0	0	10.1331	10.621	0	12.4739	11.4775	0	0	0	0	0	0	0	0	0	0	9.23461	9.33246	0	10.009	10.3785	11.1691	0	10.0904	11.9941	0	10.0289	0	0	0	0
ACOT7	0	0	0	0	0	0	0	0	0	11.7483	0	9.29873	0	0	0	0	0	0	0	10.369	10.2646	0	11.9949	11.277	0	0	0	0	0	0	0	0	0	0	0	0	0	10.5442	9.27098	10.6962	0	9.30063	11.966	9.52237	10.2855	0	0	0	0
ACOX1	0	0	0	0	0	0	0	0	0	9.82506	0	9.68332	0	0	0	0	0	0	0	0	0	0	9.89388	8.66297	0	0	0	0	0	0	0	0	0	0	0	0	0	9.6355	9.1568	0	0	0	0	0	0	0	0	0	0
ACTBL2	0	0	0	0	0	0	0	0	0	17.0857	0	16.3086	0	0	0	0	0	0	0	0	0	0	15.3129	13.6799	0	0	0	0	0	0	0	0	0	0	0	0	0	0	0	0	0	0	12.8618	0	12.5435	0	0	0	0
ACTN4	0	0	0	0	0	0	0	0	0	17.3839	12.6925	17.8569	0	0	0	0	0	0	10.9174	17.0997	16.8107	0	0	0	0	0	0	0	0	0	0	0	0	0	0	0	0	0	0	0	0	0	17.398	14.3831	17.1247	0	0	0	0
ACTR3	0	0	0	0	0	0	0	0	0	16.7295	14.4098	16.637	0	0	0	14.7892	15.8516	15.2258	12.7356	15.6455	15.3981	0	0	0	0	0	0	0	0	0	0	0	0	0	0	0	0	0	0	15.6613	14.7194	14.9435	16.4535	14.5588	15.8228	15.3748	14.764	14.8601	15.3822
AFG3L2	0	0	0	0	0	0	0	0	0	12.1028	0	12.4028	0	0	0	0	0	0	0	0	0	0	0	0	0	0	0	0	0	0	0	0	0	0	12.7417	12.4614	0	15.3712	14.6217	0	0	0	0	0	0	0	0	0	0
ALDH5A1	0	0	0	0	0	0	0	0	0	12.1945	0	11.1882	0	0	0	0	0	0	0	0	0	0	11.2507	11.7685	0	0	0	0	0	0	0	0	0	0	9.75483	9.82844	0	9.60396	10.6353	10.9335	0	11.1302	11.8732	0	11.5004	0	0	0	0
ANKLE2	0	0	0	0	0	0	0	0	0	12.2341	0	12.6801	0	0	0	0	0	0	0	0	0	0	0	0	0	0	0	0	0	0	0	0	0	0	0	0	11.5226	11.7506	11.9072	0	0	0	0	0	0	0	0	0	0
ANO10	0	0	0	0	0	0	0	0	0	12.1966	0	11.6634	0	0	0	0	0	0	0	0	0	0	0	0	0	0	0	0	0	0	0	0	0	0	0	0	0	0	0	0	0	0	0	0	0	0	0	0	0
APEX1	0	0	0	0	0	0	0	0	0	14.122	0	13.5304	0	0	0	0	0	0	0	0	0	0	0	0	0	0	0	0	0	0	0	0	0	0	0	0	0	0	0	0	0	0	0	0	0	0	0	0	0
APMAP	0	0	0	0	0	0	0	0	0	13.4791	12.3324	13.3116	0	0	0	0	0	0	0	0	0	0	0	0	0	0	0	0	0	0	0	0	0	0	0	0	0	0	0	0	0	0	0	0	0	0	0	0	0
APOA1	0	0	0	0	0	0	0	0	0	10.7754	0	10.8255	0	0	0	0	0	0	0	0	0	0	12.2367	12.2804	0	0	0	0	0	0	0	0	0	0	10.5459	10.7231	0	11.4382	10.9733	10.9777	0	10.5477	11.7607	0	10.8686	0	0	0	0
ARPC1B	0	0	0	0	0	0	0	0	0	15.5273	14.0662	15.5214	0	0	0	14.1982	15.4104	14.5273	0	0	0	0	0	0	0	0	0	0	0	0	0	0	0	0	0	0	0	0	0	14.8031	14.2895	14.5373	15.5833	13.7286	14.9922	0	0	0	14.7512
ARPC2	0	0	0	0	0	0	0	0	0	15.4238	14.317	15.3521	14.531	14.5906	14.7264	14.5195	15.3284	14.9944	0	0	0	0	0	0	0	0	0	0	0	0	0	0	0	0	0	0	0	0	0	14.4188	14.4292	14.144	15.142	14.3186	14.9938	15.0045	14.5015	14.7377	15.0179
ASNS	0	0	0	0	0	0	0	0	0	10.743	0	9.71026	0	0	0	0	0	0	0	0	0	0	12.6188	11.7523	0	0	0	0	0	0	0	0	0	0	0	0	0	0	0	0	0	0	12.4877	0	11.8913	0	0	0	0
ATP5MJ	0	0	0	0	0	0	0	0	0	13.0137	0	12.6775	0	0	0	0	0	0	0	0	0	0	0	0	0	0	0	10.7163	0	8.26503	0	0	0	0	11.1875	9.47313	0	12.8762	12.2512	0	0	0	0	0	0	0	0	0	0
BAG6	0	0	0	0	0	0	0	0	0	11.6385	0	10.8453	0	0	0	0	0	0	0	0	0	0	0	0	0	0	0	11.5206	9.86389	11.1513	0	0	0	0	0	0	0	0	0	0	0	0	0	0	0	0	0	0	0
BASP1	0	0	0	0	0	0	0	0	0	11.0963	0	8.60755	0	0	0	0	0	0	0	0	0	0	10.841	10.1848	0	0	0	12.0136	0	10.9148	0	0	0	0	0	0	0	13.0565	13.5732	0	0	0	0	0	0	0	0	0	0
BIN1	0	0	0	0	0	0	0	0	0	11.8292	0	10.2377	0	0	0	0	0	0	0	10.9799	10.2331	0	12.4609	12.1872	0	0	0	0	0	0	0	0	0	0	0	0	0	10.4277	9.48997	12.3243	0	9.96249	12.2735	0	11.1984	0	0	0	0
BLVRB	0	0	0	0	0	0	0	0	0	9.53762	0	9.96304	0	0	0	10.037	11.0039	10.2086	0	11.9725	11.8574	0	13.1863	12.9618	0	0	0	0	0	0	0	0	0	0	8.71564	9.06956	0	10.569	10.9332	11.0616	0	9.84841	12.3651	0	12.0871	0	0	0	0
CAPZA1	0	0	0	0	0	0	0	0	0	15.7835	15.5335	15.8204	0	0	0	15.6771	15.9826	15.7393	0	0	0	0	0	0	0	0	0	0	0	0	15.8901	15.8986	15.8865	0	0	0	0	0	0	15.1369	16.1093	15.2588	15.8385	15.4486	15.9511	15.7288	15.906	15.7977	15.7254
CAPZB	0	0	0	0	0	0	0	0	0	15.3663	15.3213	14.9548	15.3804	15.5602	15.3876	15.2477	15.6289	15.3264	0	0	0	0	0	0	0	0	0	0	0	0	15.4521	15.5794	15.7484	0	0	0	0	0	0	0	0	0	15.3263	14.6084	15.077	15.3903	15.539	15.2478	15.3937
CAST	0	0	0	0	0	0	0	0	0	15.351	7.87648	15.079	0	0	0	0	0	0	0	0	0	0	0	0	0	0	0	15.7893	12.5217	14.712	0	0	0	0	0	0	0	15.2978	15.0423	0	0	0	0	0	0	0	0	0	0
CNIH4	0	0	0	0	0	0	0	0	0	11.8512	0	10.4203	0	0	0	0	0	0	0	0	0	0	0	0	0	0	0	0	0	0	0	0	0	0	0	0	0	0	0	0	0	0	0	0	0	0	0	0	0
CNOT1	0	0	0	0	0	0	0	0	0	12.0719	0	9.95206	0	0	0	0	0	0	0	0	0	0	9.43222	9.72657	0	0	0	0	0	0	0	0	0	0	0	0	0	11.3438	10.2712	0	0	0	0	0	0	0	0	0	0
CSRP2	0	0	0	0	0	0	0	0	0	12.4709	0	11.5692	0	0	0	0	0	0	0	10.9554	10.6198	0	10.6838	11.0215	0	9.44361	11.5316	9.33361	11.1167	10.5265	0	0	0	0	0	0	0	0	0	0	0	0	9.30635	0	10.0902	0	0	0	0
CTSC	0	0	0	0	0	0	0	0	0	10.7845	0	8.06461	0	0	0	0	0	0	0	10.1934	9.23765	0	11.4888	12.3116	0	0	0	0	0	0	0	0	0	0	0	0	0	9.57021	8.77497	0	0	0	11.3802	0	10.6604	0	0	0	0
CYC1	0	0	0	0	0	0	0	0	0	13.2494	0	12.6249	0	0	0	0	0	0	0	0	0	0	0	0	0	0	0	10.9925	0	9.03604	0	0	0	0	9.98165	8.41496	0	13.0667	12.6008	0	0	0	0	0	0	0	0	0	0
DDOST	0	0	0	0	0	0	0	0	0	13.4156	0	11.4111	0	0	0	0	0	0	0	0	0	0	0	0	0	0	0	15.0289	10.0475	14.0035	0	0	0	0	0	0	0	0	0	0	0	0	0	0	0	0	0	0	0
DIAPH1	0	0	0	0	0	0	0	0	0	11.9094	0	10.2101	0	0	0	0	0	0	0	0	0	0	12.9355	11.726	0	0	0	0	0	0	0	0	0	0	0	0	0	11.1288	10.5935	11.9012	0	10.4393	12.3152	0	11.3734	0	0	0	0
DLAT	0	0	0	0	0	0	0	0	0	12.1075	0	12.6574	0	0	0	0	0	0	0	0	0	0	0	0	0	0	0	16.5343	0	15.2366	0	0	0	0	11.6426	10.8903	0	13.7189	14.4231	0	0	0	0	0	0	0	0	0	0
DLST	0	0	0	0	0	0	0	0	0	9.01525	0	8.41094	0	0	0	0	0	0	0	0	0	0	0	0	0	0	0	13.5517	0	12.5325	0	0	0	0	9.06121	9.45779	0	12.9123	13.4012	9.33411	0	8.99669	0	0	0	0	0	0	0
DPP3	0	0	0	0	0	0	0	0	0	10.9328	0	10.5366	0	0	0	0	0	0	0	11.4993	7.04321	0	13.6417	13.113	0	0	0	0	0	0	0	0	0	0	8.99994	10.04	0	10.7121	10.7255	11.7391	0	8.97299	13.1332	0	11.8071	0	0	0	0
EFHD2	0	0	0	0	0	0	0	0	0	12.0452	0	10.8657	0	0	0	0	0	0	0	10.1204	8.81622	0	10.4903	9.93116	0	0	0	0	0	0	0	0	0	0	0	0	0	9.33705	10.2771	0	0	0	0	0	0	0	0	0	0
EPN3	0	0	0	0	0	0	0	0	0	10.0414	0	9.80552	0	0	0	0	0	0	0	0	0	0	10.6819	9.22798	0	0	0	0	0	0	0	0	0	0	0	0	0	11.0613	9.95849	0	0	0	0	0	0	0	0	0	0
ERP44	0	0	0	0	0	0	0	0	0	12.828	0	11.0647	0	0	0	0	0	0	0	10.3237	10.1378	0	13.0331	12.2796	0	0	0	0	0	0	0	0	0	0	0	0	0	12.7352	11.6532	0	0	0	12.6102	0	10.5235	0	0	0	0
ESPN	0	0	0	0	0	0	0	0	0	12.3071	0	10.8479	0	0	0	0	0	0	0	0	0	0	0	0	0	0	0	0	0	0	0	0	0	0	0	0	0	0	0	0	0	0	0	0	0	0	0	0	0
FAM3C	0	0	0	0	0	0	0	0	0	12.6636	0	13.0176	0	0	0	0	0	0	0	0	0	0	0	0	0	0	0	11.6891	0	9.26328	0	0	0	0	9.79676	9.73005	0	0	0	0	0	0	0	0	0	0	0	0	0
FAM83H	0	0	0	0	0	0	0	0	0	13.6604	0	13.7102	0	0	0	0	0	0	0	0	0	0	0	0	0	0	0	0	0	0	0	0	0	0	12.5595	11.9289	13.2849	12.8983	12.0821	13.3642	0	12.7999	12.9343	0	12.3955	9.9747	10.8545	12.4284	0
FILIP1L	0	0	0	0	0	0	0	0	0	14.0284	0	12.5265	0	0	0	0	0	0	0	0	0	0	11.1162	9.60677	0	0	0	0	0	0	0	0	0	0	0	0	0	10.3002	10.5175	11.9533	0	9.87388	11.9169	0	10.8045	0	0	0	0
FLII	0	0	0	0	0	0	0	0	0	11.2689	0	10.744	0	0	0	0	0	0	0	0	0	0	0	0	0	0	0	0	0	0	0	0	0	0	0	0	0	0	0	0	0	0	0	0	0	0	0	0	0
FSCN1	0	0	0	0	0	0	0	0	0	12.6812	0	12.4794	0	0	0	0	0	0	0	0	0	0	10.1542	8.56759	0	0	0	0	0	0	0	0	0	0	0	0	0	0	0	0	0	0	13.0142	0	11.1177	0	0	0	0
FUBP1	0	0	0	0	0	0	0	0	0	12.3308	0	12.4337	10.8059	12.0771	11.5727	10.092	12.8781	10.6222	0	0	0	0	9.67116	8.94383	10.5615	12.1392	12.4775	15.3912	12.1772	14.5444	9.42543	13.3462	13.3911	0	0	0	0	11.5061	11.0029	12.724	0	10.2857	0	0	0	11.4199	13.9381	12.6161	11.1286
GNAI2	0	0	0	0	0	0	0	0	0	11.1544	0	10.6071	0	0	0	0	0	0	0	11.5693	10.5497	0	10.4286	11.3685	0	0	0	10.9629	0	9.39984	0	0	0	0	10.0173	10.3803	0	12.8468	11.2084	10.8442	0	11.2709	0	0	0	0	0	0	0
GOT1	0	0	0	0	0	0	0	0	0	10.0109	0	11.5284	0	0	0	0	0	0	0	12.5597	12.0967	0	14.8445	14.1247	0	0	0	0	0	0	0	0	0	0	0	0	0	10.8277	11.1679	10.5373	0	9.07458	13.2109	0	12.6855	0	0	0	0
HEBP1	0	0	0	0	0	0	0	0	0	10.7164	0	10.017	0	0	0	0	0	0	0	0	0	0	12.4654	11.4254	0	0	0	0	0	0	0	0	0	0	0	0	0	12.0283	10.8565	0	0	0	0	0	0	0	0	0	0
HIP1R	0	0	0	0	0	0	0	0	0	12.4491	0	9.58071	0	0	0	0	0	0	0	0	0	0	0	0	0	0	0	0	0	0	0	0	0	0	0	0	0	0	0	0	0	0	0	0	0	0	0	0	0
HMGCS2	0	0	0	0	0	0	0	0	0	11.9656	0	9.32202	0	0	0	0	0	0	0	12.7461	11.7136	0	14.3895	13.8135	0	0	0	0	0	0	0	0	0	0	0	0	0	10.1684	10.9249	11.719	0	9.69923	12.199	0	11.3121	0	0	0	0
HNMT	0	0	0	0	0	0	0	0	0	9.62431	0	9.19447	0	0	0	0	0	0	0	0	0	0	11.8642	10.4381	0	0	0	0	0	0	0	0	0	0	0	0	0	0	0	0	0	0	0	0	0	0	0	0	0
IDH3A	0	0	0	0	0	0	0	0	0	11.5919	0	9.03479	0	0	0	0	0	0	0	0	0	0	10.1243	9.56498	0	0	0	0	0	0	0	0	0	0	10.5263	9.29653	0	10.3473	10.599	0	0	0	10.6333	0	9.53834	0	0	0	0
INF2	0	0	0	0	0	0	0	0	0	11.8749	0	12.6609	0	12.4878	10.5528	11.2807	9.81956	10.4613	12.8609	12.338	11.3159	13.3801	13.2466	13.0086	0	0	0	0	12.6657	10.7916	0	0	0	0	0	0	0	0	0	12.2961	0	11.8037	0	0	0	0	0	0	0
ITPKA	0	0	0	0	0	0	0	0	0	12.686	0	10.9386	0	0	0	0	0	0	0	0	0	0	10.9746	10.1127	0	0	0	0	0	0	0	0	0	0	0	0	0	0	0	0	0	0	9.70659	0	10.3318	0	0	0	0
KIAA1671	0	0	0	0	0	0	0	0	0	15.1799	0	14.3172	0	0	0	0	0	0	0	0	0	0	0	0	0	0	0	0	0	0	0	0	0	0	0	0	0	0	0	0	0	0	0	0	0	0	0	0	0
LMCD1	0	0	0	0	0	0	0	0	0	11.8266	0	10.9374	0	0	0	0	0	0	0	0	0	0	0	0	0	0	0	0	0	0	0	0	0	0	0	0	0	0	0	0	0	0	0	0	0	0	0	0	0
LMNA	0	0	0	0	0	0	0	0	0	12.7815	0	11.4283	0	0	0	0	0	0	0	0	0	0	0	0	0	0	0	0	0	0	0	0	0	0	12.6759	9.90852	0	12.7127	11.3204	0	0	0	0	0	0	0	0	0	0
LMNB1	0	0	0	0	0	0	0	0	0	6.35628	0	7.28151	0	0	0	0	0	0	0	0	0	0	0	0	0	0	0	0	0	0	0	0	0	0	0	0	0	6.18282	6.19985	0	0	0	0	0	0	0	0	0	0
LPP	0	0	0	0	0	0	0	0	0	13.517	0	12.6056	0	0	0	0	0	0	0	12.1792	11.1486	0	11.1104	11.6025	0	0	0	0	0	0	0	0	0	0	0	0	0	0	0	0	0	0	11.6464	0	11.3502	0	0	0	0
LRBA	0	0	0	0	0	0	0	0	0	9.33581	0	9.11581	0	0	0	0	0	0	0	0	0	0	10.3368	9.22863	0	0	0	0	0	0	0	0	0	0	0	0	0	0	0	0	0	0	0	0	0	0	0	0	0
LSS	0	0	0	0	0	0	0	0	0	10.31	0	8.84767	0	0	0	0	0	0	0	0	0	0	11.8085	10.2256	0	0	0	0	0	0	0	0	0	0	0	0	0	10.9426	9.0271	0	0	0	10.4069	0	9.4173	0	0	0	0
LTN1	0	0	0	0	0	0	0	0	0	15.0092	0	15.1848	0	0	0	0	0	0	0	0	0	0	0	0	0	0	0	0	0	0	0	0	0	0	9.48346	11.3501	0	13.0573	10.8873	14.1374	0	10.7262	13.0439	7.83599	10.2955	0	0	0	0
MACF1	0	0	0	0	0	0	0	0	0	15.947	0	14.9942	0	0	0	0	0	0	0	0	0	0	0	0	0	0	0	0	0	0	0	0	0	0	0	0	0	0	0	15.0087	0	12.9455	14.796	0	13.7116	0	0	0	0
ME1	0	0	0	0	0	0	0	0	0	12.737	0	9.04173	0	0	0	0	0	0	0	11.1911	9.64128	0	12.4542	11.9721	0	0	0	0	0	0	0	0	0	0	0	0	0	11.293	9.50571	9.84306	0	10.3318	12.6766	0	11.6376	0	0	0	0
MEMO1	0	0	0	0	0	0	0	0	0	10.8499	0	9.53989	0	0	0	0	0	0	0	9.33934	9.72004	0	10.9438	9.72346	0	0	0	0	0	0	0	0	0	0	0	0	0	0	0	9.69112	0	10.0119	10.2481	0	10.3241	0	0	0	0
MPST	0	0	0	0	0	0	0	0	0	11.0637	0	10.6758	0	0	0	0	0	0	0	0	0	0	12.0525	11.6923	0	0	0	0	0	0	0	0	0	0	0	0	0	0	0	0	0	0	12.0006	0	10.8345	0	0	0	0
MRPL14	0	0	0	0	0	0	0	0	0	11.04	0	10.5773	0	0	0	0	0	0	0	0	0	0	0	0	0	0	0	13.1475	8.58654	12.0808	0	0	0	0	10.06	8.77798	0	12.2918	11.4683	0	0	0	0	0	0	0	0	0	0
MRPL19	0	0	0	0	0	0	0	0	0	11.3479	0	9.98768	0	0	0	0	0	0	0	0	0	0	0	0	0	0	0	10.364	0	9.10262	0	0	0	0	0	0	0	12.7826	12.2789	0	0	0	0	0	0	0	0	0	0
MRPL24	0	0	0	0	0	0	0	0	0	11.7544	0	8.71814	0	0	0	0	0	0	0	0	0	0	0	0	0	0	0	0	0	0	0	0	0	0	0	0	0	0	0	0	0	0	0	0	0	0	0	0	0
MRPL4	0	0	0	0	0	0	0	0	0	10.3444	0	9.62609	0	0	0	0	0	0	0	0	0	0	0	0	0	0	0	12.0675	0	10.2154	0	0	0	0	0	0	0	12.9485	10.9544	0	0	0	0	0	0	0	0	0	0
MRPL48	0	0	0	0	0	0	0	0	0	11.4228	0	10.1621	0	0	0	0	0	0	0	0	0	0	0	0	0	0	0	10.4517	0	10.1367	0	0	0	0	9.43973	8.51278	0	12.7236	12.2685	0	0	0	0	0	0	0	0	0	0
MRPS5	0	0	0	0	0	0	0	0	0	10.493	0	10.1104	0	0	0	0	0	0	0	0	0	0	0	0	0	0	0	0	0	0	0	0	0	0	9.69474	8.7862	0	11.6873	11.218	0	0	0	0	0	0	0	0	0	0
MTAP	0	0	0	0	0	0	0	0	0	9.35921	0	9.22244	0	0	0	0	0	0	0	0	0	0	11.0828	10.3057	0	0	0	0	0	0	0	0	0	0	0	0	0	0	0	0	0	0	0	0	0	0	0	0	0
MYH10	0	0	0	0	0	0	0	0	0	13.4242	0	11.6135	0	0	0	0	0	0	0	0	0	0	11.8328	10.1241	0	0	0	0	0	0	0	0	0	0	10.391	8.96204	0	11.7614	10.5421	12.6227	0	11.06	12.7054	0	11.1726	0	0	0	0
MYL12A	0	0	0	0	0	0	0	0	0	15.1282	13.0994	14.1321	0	0	0	0	0	0	0	0	0	0	0	0	0	0	0	0	0	0	0	0	0	0	0	0	0	0	0	0	0	0	0	0	0	0	0	0	0
MYLK	0	0	0	0	0	0	0	0	0	10.583	0	10.5597	0	0	0	0	0	0	0	13.2554	12.0652	0	12.6595	11.9276	0	0	0	0	0	0	0	0	0	0	0	0	0	0	0	0	0	0	0	0	0	0	0	0	0
MYO18A	0	0	0	0	0	0	0	0	0	10.505	0	11.0127	0	0	0	0	0	0	0	0	0	0	0	0	0	0	0	0	0	0	0	0	0	0	0	0	0	0	0	0	0	0	0	0	0	0	0	0	0
NCAPD2	0	0	0	0	0	0	0	0	0	12.3583	13.1712	11.8207	0	0	0	0	0	0	0	0	0	0	0	0	14.3706	13.7238	13.1827	14.3947	13.3277	13.7506	0	0	0	14.2987	13.8304	14.1442	14.0381	12.0763	14.64	14.7007	12.6188	14.0681	14.4255	13.2085	13.2915	0	0	0	0
NDUFB9	0	0	0	0	0	0	0	0	0	11.8938	0	10.8461	0	0	0	0	0	0	0	0	0	0	0	0	0	0	0	12.2386	0	10.9218	0	0	0	0	10.7853	10.1116	0	13.0001	11.8766	0	0	0	0	0	0	0	0	0	0
NDUFS3	0	0	0	0	0	0	0	0	0	11.942	0	12.0724	0	0	0	0	0	0	0	0	0	0	0	0	0	0	0	12.1721	9.10369	11.9702	0	0	0	0	11.4959	10.6305	0	12.7304	12.2839	0	0	0	0	0	0	0	0	0	0
NNT	0	0	0	0	0	0	0	0	0	10.5532	0	10.7445	0	0	0	0	0	0	0	0	0	0	0	0	0	0	0	11.6633	0	10.4526	0	0	0	0	9.86426	10.7198	0	11.8333	11.7448	0	0	0	0	0	0	0	0	0	0
NUDT5	0	0	0	0	0	0	0	0	0	10.8096	0	9.57593	0	9.53482	9.10948	8.76852	11.1553	9.58993	0	12.1284	11.4414	0	13.2283	13.1493	9.91636	9.7942	9.40356	11.4168	6.88704	9.71923	0	0	0	0	0	0	0	11.3668	10.2997	10.6759	0	9.61032	12.7412	0	11.267	0	0	0	0
NUP54	0	0	0	0	0	0	0	0	0	16.2887	0	15.9927	0	0	0	0	0	0	0	0	0	0	0	0	0	0	0	10.0503	0	10.9211	0	0	0	0	0	0	0	0	0	0	0	0	0	0	0	0	0	0	0
OCIAD1	0	0	0	0	0	0	0	0	0	11.8312	0	8.58252	0	0	0	0	0	0	0	0	0	0	0	0	0	0	0	0	0	0	0	0	0	0	11.6032	9.19878	0	12.7226	12.0686	0	0	0	0	0	0	0	0	0	0
OGFR	0	0	0	0	0	0	0	0	0	18.65	0	19.0626	0	0	0	0	0	0	0	0	0	0	0	0	0	0	0	0	0	0	0	0	0	0	17.8241	17.1541	0	18.2627	17.4441	0	0	0	0	0	0	0	0	0	0
PAWR	0	0	0	0	0	0	0	0	0	11.0151	0	9.82776	0	0	0	0	0	0	0	0	0	0	0	0	0	0	0	0	0	0	0	0	0	0	0	0	0	9.50398	8.82699	0	0	0	0	0	0	0	0	0	0
PCM1	0	0	0	0	0	0	0	0	0	14.7073	0	15.2123	0	0	0	0	13.7147	11.3589	0	15.0201	11.8447	0	14.785	14.8079	0	0	0	10.946	13.9542	13.7226	0	0	0	0	11.1505	13.4464	0	11.1387	13.2421	15.2546	0	15.0196	14.7688	0	15.3772	0	0	0	0
PCMT1	0	0	0	0	0	0	0	0	0	10.0158	0	8.541	0	0	0	0	0	0	0	11.9274	10.4759	0	13.0014	13.0966	0	0	0	0	0	0	0	0	0	0	0	0	0	11.778	11.7827	0	0	0	12.116	0	10.9414	9.7518	0	9.25174	0
PDHX	0	0	0	0	0	0	0	0	0	9.8169	0	9.47938	0	0	0	0	0	0	0	0	0	0	0	0	0	0	0	15.404	7.02137	14.1183	0	0	0	0	0	0	0	12.6438	11.8312	0	0	0	0	0	0	0	0	0	0
PDXK	0	0	0	0	0	0	0	0	0	11.3468	0	10.2773	0	0	0	0	0	0	0	0	0	0	12.3107	11.472	0	0	0	0	0	0	0	0	0	0	0	0	0	10.3697	10.6215	0	0	0	11.7913	0	10.6182	0	0	0	0
PEBP1	0	0	0	0	0	0	0	0	0	11.3383	0	10.9574	0	0	0	0	0	0	0	12.1253	11.7204	0	12.8024	13.1842	0	0	0	11.7445	0	10.9924	0	0	0	0	0	0	0	10.8017	9.11413	0	0	0	12.2773	0	11.6175	0	0	0	0
PEPD	0	0	0	0	0	0	0	0	0	11.0704	0	11.3518	0	0	0	0	0	0	0	12.742	11.6665	0	14.4	14.0103	0	0	0	0	0	0	0	0	0	0	8.62598	9.48434	0	10.2451	11.6175	12.8603	0	12.076	13.8168	0	12.9458	0	0	0	0
PGM1	0	0	0	0	0	0	0	0	0	14.8794	0	14.8036	0	0	0	0	0	0	0	0	0	0	13.8335	13.3186	0	0	0	0	0	0	0	0	0	0	0	0	0	0	0	0	0	0	0	0	0	0	0	0	0
PIK3C2A	0	0	0	0	0	0	0	0	0	12.8807	0	9.78477	0	0	0	0	0	0	0	0	0	0	0	0	0	0	0	0	0	0	0	0	0	0	0	0	0	9.49031	9.47648	0	0	0	0	0	0	0	0	0	0
PITPNA	0	0	0	0	0	0	0	0	0	9.09391	0	9.87844	0	0	0	0	0	0	0	0	0	0	10.5436	10.2173	0	0	0	0	0	0	0	0	0	0	0	0	0	0	0	0	0	0	10.564	0	10.0636	0	0	0	0
PITPNB	0	0	0	0	0	0	0	0	0	11.7875	0	7.98499	0	0	0	0	0	0	0	8.76227	10.2579	0	12.0163	10.4288	0	0	0	0	0	0	0	0	0	0	8.40382	8.16606	0	11.1881	10.1281	9.61757	0	9.11924	12.2089	0	10.0905	0	0	0	0
PLS1	0	0	0	0	0	0	0	0	0	12.8474	0	10.2997	0	0	0	0	0	0	0	0	0	0	9.38932	11.1359	0	0	0	0	0	0	0	0	0	0	0	0	0	0	0	0	0	0	0	0	0	0	0	0	0
PPL	0	0	0	0	0	0	0	0	0	13.7104	0	13.2872	0	0	0	0	0	0	0	0	0	0	10.6642	10.118	0	0	0	0	0	0	0	0	0	0	9.80007	8.57164	0	12.0156	11.3007	12.6518	0	10.6058	12.2688	0	10.2307	0	0	0	0
PPP1R2	0	0	0	0	0	0	0	0	0	11.658	0	10.683	0	0	0	0	0	0	0	0	0	0	11.7287	11.0276	0	0	0	0	0	0	0	0	0	0	0	0	0	10.9406	9.5351	0	0	0	10.5414	0	9.112	0	0	0	0
PPP2R5C	0	0	0	0	0	0	0	0	0	13.5644	0	12.0838	0	0	0	0	0	0	0	0	0	0	11.5871	10.582	0	0	0	0	0	0	0	0	0	0	0	0	0	0	0	0	0	0	0	0	0	0	0	0	0
PPP2R5E	0	0	0	0	0	0	0	0	0	11.6445	0	11.3444	0	0	0	0	0	0	0	0	0	0	10.1571	11.493	0	0	0	0	0	0	0	0	0	0	0	0	0	10.9138	10.3194	0	0	0	0	0	0	0	0	0	0
PPP6R3	0	0	0	0	0	0	0	0	0	10.2376	0	9.18324	0	0	0	0	0	0	0	9.99785	8.95187	0	12.1428	11.1912	0	0	0	0	0	0	0	0	0	0	0	0	0	10.8344	9.40638	10.2378	0	9.26572	11.6646	0	9.72965	0	0	0	0
PPT1	0	0	0	0	0	0	0	0	0	12.7737	0	12.134	0	0	0	0	0	0	0	0	0	0	12.3817	11.5209	0	0	0	0	0	0	0	0	0	0	0	0	0	10.5574	10.426	11.2159	0	10.1741	12.6132	0	12.164	0	0	0	0
PRKAG1	0	0	0	0	0	0	0	0	0	10.6842	0	8.89333	0	0	0	0	0	0	0	0	0	0	11.9481	10.2015	0	0	0	0	0	0	0	0	0	0	0	0	0	10.458	10.2897	0	0	0	0	0	0	0	0	0	0
PRSS8	0	0	0	0	0	0	0	0	0	11.031	0	10.9538	0	0	0	0	0	0	0	10.4826	10.519	0	0	0	0	0	0	0	0	0	0	0	0	0	0	0	0	12.0331	11.3512	0	0	0	0	0	0	0	0	0	0
PSMB1	0	0	0	0	0	0	0	0	0	16.8975	15.445	17.1292	0	0	0	0	0	0	17.8473	16.1483	16.2856	0	0	0	0	0	0	0	0	0	0	0	0	0	0	0	0	0	0	0	0	0	17.0918	15.7078	16.786	0	0	0	0
PSMF1	0	0	0	0	0	0	0	0	0	11.3597	0	8.77157	0	0	0	0	0	0	0	0	0	0	11.337	9.55539	0	0	0	0	0	0	0	0	0	0	0	0	0	10.3176	8.79659	0	0	0	0	0	0	0	0	0	0
PTPN12	0	0	0	0	0	0	0	0	0	10.5452	0	9.90491	0	0	0	0	0	0	0	0	0	0	0	0	0	0	0	0	0	0	0	0	0	0	0	0	0	0	0	0	0	0	0	0	0	0	0	0	0
PYGL	0	0	0	0	0	0	0	0	0	11.2522	0	9.96985	0	0	0	0	0	0	0	10.5631	10.0988	0	12.6641	11.8399	10.827	10.5447	10.2278	11.3897	0	10.6201	0	0	0	0	0	0	0	11.226	10.0756	10.8938	0	9.8057	12.3248	0	11.0269	0	0	0	0
RAB18	0	0	0	0	0	0	0	0	0	9.51641	0	9.05276	0	0	0	0	0	0	0	0	0	0	9.91198	9.6894	0	0	0	12.5128	0	10.6482	0	0	0	0	10.1219	9.72552	0	11.3368	11.4166	0	0	0	11.3868	0	10.0513	0	0	0	0
RIPOR3	0	0	0	0	0	0	0	0	0	14.2063	0	13.6522	0	0	0	0	0	0	0	0	0	0	13.6659	13.0317	0	0	0	0	0	0	0	0	0	0	0	0	0	9.28004	12.2841	14.9235	0	11.1983	14.9196	0	13.9142	0	0	0	0
ROCK2	0	0	0	0	0	0	0	0	0	10.4	0	10.8701	0	0	0	0	0	0	0	0	0	0	0	0	0	0	0	0	0	0	0	0	0	0	0	0	0	0	0	0	0	0	0	0	0	0	0	0	0
RRAS2	0	0	0	0	0	0	0	0	0	10.3191	0	8.76664	0	0	0	0	0	0	0	0	0	0	11.1037	9.10936	0	0	0	0	0	0	0	0	0	0	0	0	0	12.2635	10.041	0	0	0	0	0	0	0	0	0	0
SCML2	0	0	0	0	0	0	0	0	0	10.7893	0	11.4144	0	0	0	0	0	0	0	0	0	0	11.1952	11.1638	0	0	0	14.9702	0	12.8538	0	0	0	0	0	0	0	11.1794	10.8192	0	0	0	11.4407	0	10.5738	0	0	0	0
SEC23IP	0	0	0	0	0	0	0	0	0	10.5822	0	9.73838	0	0	0	0	0	0	0	0	0	0	12.1062	10.8758	0	0	0	0	0	0	0	0	0	0	0	0	0	11.0101	10.2254	0	0	0	10.8551	0	9.48467	0	0	0	0
SEC24A	0	0	0	0	0	0	0	0	0	13.1346	12.7292	11.8929	0	0	0	0	0	0	0	14.2175	13.2104	0	15.3539	14.7738	0	0	0	0	0	0	0	0	0	0	13.4285	13.6542	0	11.8533	12.8832	0	0	0	14.083	0	13.3903	0	0	0	0
SLC25A4	0	0	0	0	0	0	0	0	0	11.5985	0	10.2866	0	0	0	0	0	0	0	0	0	0	0	0	0	0	0	13.9276	0	12.4787	0	0	0	0	8.99358	8.84942	0	11.8517	11.271	10.3491	0	7.62699	0	0	0	0	0	0	0
SMARCE1	0	0	0	0	0	0	0	0	0	17.8623	0	17.9487	0	0	0	0	0	0	0	0	0	0	0	0	0	0	0	0	0	0	0	0	0	0	0	0	0	17.9717	17.4691	0	0	0	0	0	0	0	0	0	0
SNAP23	0	0	0	0	0	0	0	0	0	11.8877	0	10.1222	0	0	0	0	0	0	0	11.4254	10.1538	0	12.1072	11.6354	0	0	0	9.77414	0	9.43058	0	0	0	0	9.10807	8.96675	0	12.187	11.8872	11.1284	0	9.98349	9.94737	0	8.87897	0	0	0	0
SNTB2	0	0	0	0	0	0	0	0	0	14.5722	0	14.8465	0	0	0	0	0	0	0	0	0	0	0	0	0	0	0	13.0035	13.0022	13.3833	0	0	0	0	0	0	0	11.2705	11.2841	14.4469	0	13.9029	0	0	0	0	0	0	0
SNX9	0	0	0	0	0	0	0	0	0	11.9259	0	8.96433	0	0	0	0	0	0	0	0	0	0	0	0	0	0	0	0	0	0	0	0	0	0	0	0	0	11.3691	9.65896	0	0	0	0	0	0	0	0	0	0
SORBS1	0	0	0	0	0	0	0	0	0	10.6729	0	12.9295	0	0	0	0	0	0	0	14.3695	13.832	0	13.7151	13.6755	0	0	0	9.19887	4.88157	6.31243	0	0	0	0	0	0	0	7.95373	7.45541	10.8035	0	7.90234	11.8768	0	10.5075	0	0	0	0
SPR	0	0	0	0	0	0	0	0	0	10.3857	0	9.47016	0	0	0	0	0	0	0	0	0	0	10.3801	12.7171	0	0	0	0	0	0	0	0	0	0	0	0	0	10.1345	9.43434	9.01678	0	11.56	12.366	0	11.8374	0	0	0	0
SPTAN1	0	0	0	0	0	0	0	0	0	13.9718	0	12.7111	0	0	0	0	0	0	0	11.479	12.1611	0	11.0411	12.8454	0	0	0	0	0	0	0	0	0	0	0	0	0	12.2041	10.6788	0	0	0	0	0	0	0	0	0	0
SSR3	0	0	0	0	0	0	0	0	0	10.5699	0	10.7597	0	0	0	0	0	0	0	0	0	0	0	0	12.7814	11.3879	0	12.9391	0	11.7688	0	0	0	0	9.72722	11.1852	0	0	0	0	0	0	0	0	0	0	0	0	0
STMN1	0	0	0	0	0	0	0	0	0	9.94412	0	10.7691	0	0	0	0	0	0	0	10.8434	10.8054	0	13.3286	12.2108	0	0	0	0	0	0	0	0	0	0	0	0	0	12.0001	10.7399	0	0	0	0	0	0	0	0	0	0
SYNPO	0	0	0	0	0	0	0	0	0	12.5523	0	11.0403	0	0	0	0	0	0	0	0	0	0	0	0	0	0	0	0	0	0	0	0	0	0	0	0	0	0	0	0	0	0	0	0	0	0	0	0	0
TFG	0	0	0	0	0	0	0	0	0	11.8338	0	11.6481	11.6499	11.793	11.8253	11.8408	11.9238	10.7773	0	12.067	12.1358	0	12.8357	12.6426	11.275	11.8657	12.0913	0	0	0	0	0	0	0	0	0	10.3822	12.1809	11.7071	0	0	0	11.1342	0	11.9979	11.9293	11.4882	11.8879	11.929
TMEM70	0	0	0	0	0	0	0	0	0	9.6069	0	11.3962	0	0	0	0	0	0	0	0	0	0	0	0	0	0	0	12.635	0	10.9225	0	0	0	0	0	0	0	10.6563	11.9175	0	0	0	0	0	0	0	0	0	0
TNKS1BP1	0	0	0	0	0	0	0	0	0	13.716	0	12.8502	0	0	0	0	0	0	0	10.525	10.2797	0	9.67734	10.4035	0	0	0	0	0	0	0	0	0	0	0	0	0	9.1097	8.96281	10.7905	0	10.1219	11.7241	0	10.5076	0	0	0	0
TNPO3	0	0	0	0	0	0	0	0	0	10.5441	0	9.19932	0	0	0	0	0	0	0	0	0	0	10.2965	9.33718	0	0	0	0	0	0	0	0	0	0	10.0144	9.40144	0	9.99365	10.0491	0	0	0	9.96014	0	8.75136	0	0	0	0
TOMM40	0	0	0	0	0	0	0	0	0	9.61365	0	8.74804	0	0	0	0	0	0	0	0	0	0	0	0	0	0	0	14.238	0	12.2059	0	0	0	0	10.7597	11.6547	0	11.841	11.4963	0	0	0	9.06909	0	8.55157	0	0	0	0
TWF2	0	0	0	0	0	0	0	0	0	13.0092	0	11.0004	0	8.35297	7.93876	7.34913	8.25006	7.47739	0	11.4901	9.28469	0	12.2766	11.2702	0	0	0	0	0	0	0	0	0	0	0	0	0	11.025	9.34993	9.98326	0	8.85866	11.8287	0	9.40316	0	0	0	0
TXNDC17	0	0	0	0	0	0	0	0	0	11.3294	0	10.3451	0	0	0	0	0	0	0	11.5942	10.7171	0	12.1521	12.3359	0	0	0	0	0	0	0	0	0	0	0	0	0	10.9151	10.2751	0	0	0	11.0387	0	12.1137	0	0	0	0
UBXN1	0	0	0	0	0	0	0	0	0	9.579	9.38993	9.90283	0	0	0	0	0	0	0	0	0	0	13.4056	11.5148	0	0	0	0	0	0	0	0	0	0	11.5401	9.3552	0	12.2487	11.9525	0	0	0	0	0	0	0	0	0	0
UCHL3	0	0	0	0	0	0	0	0	0	9.46628	0	9.84717	0	0	0	0	0	0	0	11.9636	11.2862	0	14.1388	13.1309	0	0	0	0	0	0	0	0	0	0	8.56948	5.3998	0	10.8856	11.6188	0	0	0	12.3763	0	11.9581	0	0	0	0
UFC1	0	0	0	0	0	0	0	0	0	10.9288	0	10.4523	0	0	0	0	0	0	0	0	0	0	11.5128	10.2254	0	0	0	0	0	0	0	0	0	0	9.55905	9.36267	0	10.7492	10.4896	0	0	0	0	0	0	0	0	0	0
VASP	0	0	0	0	0	0	0	0	0	15.8181	12.4926	16.0079	0	0	0	0	0	0	13.1038	14.2782	14.0742	0	0	0	0	0	0	0	0	0	0	0	0	0	0	0	0	0	0	0	0	0	15.345	11.4534	14.5525	0	0	0	0
XPO7	0	0	0	0	0	0	0	0	0	9.25673	0	9.51465	0	0	0	0	0	0	0	0	0	0	11.6426	9.79171	0	0	0	13.6833	0	12.5089	0	0	0	0	10.6479	9.95807	0	11.2649	11.1693	10.902	0	10.405	11.018	0	11.1544	0	0	0	0
YES1	0	0	0	0	0	0	0	0	0	11.8678	0	12.0059	0	0	0	0	0	0	0	11.997	11.3374	0	12.31	12.3317	0	0	0	0	0	0	0	0	0	0	10.2812	11.8663	0	12.064	11.3337	10.9995	0	12.5387	11.2291	0	11.1273	0	0	0	0
YKT6	0	0	0	0	0	0	0	0	0	10.509	0	8.60198	0	0	0	0	0	0	0	0	0	0	11.5835	9.4626	0	0	0	0	0	0	0	0	0	0	0	0	0	9.93469	9.23452	0	0	0	0	0	0	0	0	0	0
ZC3HAV1L	0	0	0	0	0	0	0	0	0	9.5966	0	9.74273	0	0	0	0	0	0	0	0	0	0	0	0	0	0	0	0	0	0	0	0	0	0	0	0	0	0	0	0	0	0	0	0	0	0	0	0	0
ZYX	0	0	0	0	0	0	0	0	0	11.9137	0	12.5204	0	0	0	0	0	0	0	12.529	12.0882	0	11.4971	10.753	0	0	0	11.0928	0	10.3159	0	0	0	0	0	0	0	0	0	0	0	0	12.6553	0	11.8541	0	0	0	0
AP1S3	0	0	0	0	0	0	0	0	0	0	0	0	11.0799	9.70858	10.8791	11.3623	10.5241	10.8774	0	0	0	0	0	0	0	0	0	0	0	0	0	0	0	0	0	0	0	0	0	0	0	0	0	0	0	10.3893	11.8783	11.8788	11.3961
AP2B1	0	0	0	0	0	0	0	0	0	0	0	0	14.5894	14.949	14.7037	0	0	0	0	0	0	0	0	0	0	0	0	14.2615	14.9171	14.6656	0	0	0	0	0	0	0	0	0	0	0	0	0	0	0	14.8369	14.5026	14.5608	14.8084
ATP5IF1	0	0	0	0	0	0	0	0	0	0	0	0	10.4101	9.72997	10.1754	0	0	0	0	11.5741	11.4786	0	9.43431	11.5086	0	0	0	0	0	0	0	0	0	0	0	0	0	0	0	0	0	0	0	0	0	0	0	0	0
BIRC2	0	0	0	0	0	0	0	0	0	0	0	0	10.4573	10.6733	10.623	10.2702	10.1157	10.4036	0	0	0	0	0	0	0	0	0	0	0	0	0	0	0	0	0	0	0	0	0	0	0	0	0	0	0	0	0	0	0
C15orf40	0	0	0	0	0	0	0	0	0	0	0	0	11.0958	9.45047	10.4938	0	0	0	0	0	0	0	0	0	9.69023	10.3542	10.3205	13.8015	10.1481	12.6996	0	13.2628	12.7659	0	0	0	0	0	0	0	0	0	0	0	0	0	12.935	10.9439	0
CALU	0	0	0	0	0	0	0	0	0	0	0	0	11.2382	12.3054	12.1946	10.6561	11.9194	11.5322	0	10.4499	9.75796	0	12.4105	11.8371	0	9.88579	11.2503	0	12.5224	11.305	0	0	0	0	0	0	0	11.6595	11.8816	0	0	0	0	0	0	9.55132	12.2949	11.527	10.2878
CC2D1A	0	0	0	0	0	0	0	0	0	0	0	0	9.22716	9.95876	9.56216	0	0	0	0	0	0	0	0	0	9.70633	9.33567	8.75746	0	0	0	0	0	0	0	0	0	0	0	0	0	0	0	0	0	0	0	0	0	0
CCAR1	0	0	0	0	0	0	0	0	0	0	0	0	16.1458	15.4667	15.6294	0	0	0	0	0	0	0	0	0	0	0	0	0	0	0	0	0	0	0	0	0	0	0	0	0	0	0	0	0	0	15.4211	16.1313	15.8451	15.4197
CCDC88C	0	0	0	0	0	0	0	0	0	0	0	0	13.1592	13.7606	12.3733	0	0	0	0	0	0	0	11.4079	13.655	0	0	0	0	0	0	0	0	0	0	0	0	0	0	0	0	0	0	0	0	0	0	12.3088	12.2066	0
CHMP2B	0	0	0	0	0	0	0	0	0	0	0	0	9.18128	9.4692	9.77202	0	0	0	0	0	0	0	0	0	0	0	0	11.1263	0	10.0866	0	0	0	0	0	0	0	0	0	0	0	0	0	0	0	0	0	0	0
CLNS1A	0	0	0	0	0	0	0	0	0	0	0	0	19.5103	18.2301	18.4346	0	0	0	0	0	0	0	0	0	0	0	0	0	0	0	18.4239	19.2653	18.9203	0	0	0	0	0	0	0	0	0	0	0	0	0	0	0	18.1602
COPRS	0	0	0	0	0	0	0	0	0	0	0	0	13.3191	11.5069	11.5964	11.9887	9.36588	11.8001	0	0	0	0	0	0	9.17734	9.99393	10.2215	0	10.6406	9.45126	0	13.0056	12.3954	0	0	0	0	0	0	0	0	0	0	0	0	8.88487	12.3541	11.2614	9.54088
DIMT1	0	0	0	0	0	0	0	0	0	0	0	0	10.5016	10.3219	10.5001	11.0093	0	9.62432	0	0	0	0	0	0	10.9638	10.3842	9.51204	10.1396	9.85771	8.49669	0	12.1357	10.831	0	0	0	10.2875	10.8591	0	0	0	0	0	0	0	9.07017	10.778	10.2065	0
EEF1D	0	0	0	0	0	0	0	0	0	0	0	0	12.4958	10.344	10.6529	12.2662	11.7604	12.0313	0	0	0	0	0	0	0	0	0	0	0	0	0	0	0	0	0	0	0	10.7249	10.5244	0	0	0	0	0	0	0	12.3786	11.5173	0
EFTUD2	0	0	0	0	0	0	0	0	0	0	0	0	14.3929	13.444	13.8162	0	0	0	0	0	0	0	0	0	0	0	0	0	0	0	0	0	0	0	0	0	0	0	0	0	0	0	0	0	0	13.225	14.5321	14.1852	0
EIF3A	0	0	0	0	0	0	0	0	0	0	0	0	16.9676	16.0201	16.4608	17.0111	16.0065	16.6353	0	0	0	0	0	0	0	0	0	0	0	0	16.773	17.097	17.2171	0	0	0	0	0	0	0	0	0	0	0	0	15.7733	16.8607	16.5779	15.9294
EIF3E	0	0	0	0	0	0	0	0	0	0	0	0	17.4469	17.0767	17.1654	17.4023	17.2647	17.369	0	0	0	0	0	0	16.0724	16.9851	17.3554	0	0	0	17.2176	17.553	17.7221	0	0	0	0	0	0	0	0	0	0	0	0	16.8292	17.2735	17.069	16.946
EIF4E2	0	0	0	0	0	0	0	0	0	0	0	0	11.3293	10.4328	10.4284	0	0	0	0	0	0	0	0	0	0	0	0	0	0	0	0	0	0	0	0	0	0	0	0	0	0	0	0	0	0	0	0	0	0
EXOSC3	0	0	0	0	0	0	0	0	0	0	0	0	10.2876	11.1534	11.4577	11.5175	11.2004	11.3815	0	9.68812	9.91288	0	0	0	11.6495	11.7816	11.773	11.4226	10.536	11.7007	0	0	0	0	0	0	0	0	0	0	0	0	0	0	0	10.3683	11.4296	0	9.43865
FOXA1	0	0	0	0	0	0	0	0	0	0	0	0	12.0343	11.4545	12.3216	0	0	0	0	0	0	0	0	0	0	0	0	12.2381	10.7128	10.7172	0	0	0	0	0	0	0	0	0	0	0	0	0	0	0	0	0	0	0
GAR1	0	0	0	0	0	0	0	0	0	0	0	0	10.4199	9.07863	10.2731	0	0	0	0	0	0	0	0	0	11.4043	11.1685	10.2469	12.5556	9.78524	11.0585	0	0	0	0	0	0	0	0	0	0	0	0	0	0	0	0	0	0	0
HNRNPLL	0	0	0	0	0	0	0	0	0	0	0	0	10.8292	11.0617	10.5862	10.1449	10.0085	10.8888	0	0	0	0	0	0	0	0	0	0	0	0	0	0	0	0	0	0	0	0	0	0	0	0	0	0	0	0	0	0	0
IARS1	0	0	0	0	0	0	0	0	0	0	0	0	12.0951	10.4366	10.9755	11.3309	10.6497	11.065	0	0	0	0	0	0	0	0	0	0	0	0	0	0	0	0	0	0	0	0	0	0	0	0	0	0	0	10.3841	10.6135	10.8045	0
IMP3	0	0	0	0	0	0	0	0	0	0	0	0	10.9106	10.2901	10.6215	11.5603	0	10.0144	0	0	0	0	0	0	8.74015	8.88414	9.90056	10.3024	10.053	10.4286	0	0	0	0	0	0	0	0	0	0	0	0	0	0	0	9.07068	11.5986	10.656	0
KATNA1	0	0	0	0	0	0	0	0	0	0	0	0	10.5769	10.5166	10.3005	11.391	10.6924	11.2544	0	0	0	0	0	0	0	0	0	0	10.8792	9.89351	0	0	0	0	0	0	0	0	0	0	0	0	0	0	0	9.46646	11.2838	10.4412	0
LRP2	0	0	0	0	0	0	0	0	0	0	0	0	10.7249	12.4071	12.7254	11.7495	11.8854	11.9925	12.441	0	11.07	0	0	0	0	12.0936	12.4993	13.1314	11.7691	11.6214	0	0	0	0	0	0	0	0	0	0	0	0	0	0	0	11.7928	12.6697	11.2443	12.0437
LRRFIP2	0	0	0	0	0	0	0	0	0	0	0	0	10.4279	9.82563	11.109	9.96987	10.0945	10.0537	0	0	0	0	0	0	0	0	0	9.49243	10.4011	10.1443	0	0	0	0	9.62025	9.63316	0	0	0	0	0	0	0	0	0	10.0487	10.6566	10.4969	9.78975
LRRK1	0	0	0	0	0	0	0	0	0	0	0	0	10.6984	8.75832	9.92452	0	0	0	0	0	0	0	0	0	11.7578	11.3951	9.75032	0	0	0	0	0	0	0	0	0	0	0	0	0	0	0	0	0	0	0	0	0	0
MOB2	0	0	0	0	0	0	0	0	0	0	0	0	12.1427	10.5465	11.1183	12.1329	0	11.7701	0	0	0	0	0	0	0	0	0	0	0	0	0	12.4644	11.7604	0	0	0	0	0	0	0	0	0	0	0	0	10.6669	12.9297	11.9189	10.75
MRPL12	0	0	0	0	0	0	0	0	0	0	0	0	11.409	10.4472	11.1427	9.02597	9.45741	9.66542	0	0	0	0	0	0	10.4897	11.0919	11.0788	14.1159	10.2705	13.1394	0	12.6402	11.1869	0	0	0	0	13.4604	12.4033	0	0	0	0	0	0	8.42261	13.2555	12.6077	8.85184
MRPS18B	0	0	0	0	0	0	0	0	0	0	0	0	11.6052	9.48193	10.493	11.4667	0	10.4635	0	0	0	0	0	0	0	0	0	11.041	9.48856	10.4341	0	0	0	0	0	0	0	0	0	0	0	0	0	0	0	0	0	0	0
MRPS22	0	0	0	0	0	0	0	0	0	0	0	0	11.9163	9.82942	10.7474	0	0	0	0	0	0	0	0	0	0	0	0	12.5701	9.61477	10.7861	0	0	0	0	0	0	0	11.125	12.7508	0	0	0	0	0	0	0	13.0109	11.859	0
MSN	0	0	0	0	0	0	0	0	0	0	0	0	11.2331	12.1715	12.0517	0	0	0	0	12.6704	10.8372	0	0	0	10.3297	10.476	10.3165	11.2364	11.7244	11.5607	0	0	0	0	0	0	0	0	0	0	0	0	10.3612	0	11.2455	0	0	0	12.2652
NDE1	0	0	0	0	0	0	0	0	0	0	0	0	9.73379	11.8197	11.1072	8.93681	11.3001	10.5759	0	10.8983	9.63202	0	10.7462	10.7897	0	10.7316	11.9718	0	11.9143	10.4695	0	0	0	0	0	0	0	0	0	0	0	0	0	0	0	10.4393	10.8123	11.1676	10.5879
NSF	0	0	0	0	0	0	0	0	0	0	0	0	11.571	9.4367	11.5622	12.7342	10.6588	12.4938	0	0	0	0	0	0	9.92699	10.5432	11.3867	11.9612	0	11.2841	0	13.0639	13.7942	0	0	0	0	0	0	0	0	0	0	0	0	0	0	0	0
NSRP1	0	0	0	0	0	0	0	0	0	0	0	0	11.9817	11.411	11.1317	0	0	0	0	0	0	0	0	0	0	0	0	0	11.4442	10.7289	0	0	0	0	0	0	0	0	0	0	0	0	0	0	0	0	11.4532	11.3791	0
PDLIM7	0	0	0	0	0	0	0	0	0	0	0	0	11.4924	11.6192	11.6197	0	0	0	0	0	0	0	0	0	11.9257	11.7172	11.38	11.1977	11.8389	11.9382	0	0	0	0	0	0	0	0	0	0	0	0	0	0	0	11.7041	10.5921	11.2251	10.7642
PFKFB3	0	0	0	0	0	0	0	0	0	0	0	0	11.4011	9.28371	8.91213	10.9404	0	9.51687	0	0	0	0	0	0	0	0	0	0	0	0	0	11.0283	10.2153	0	0	0	0	0	0	0	0	0	0	0	0	0	13.4039	12.248	0
PSMD2	0	0	0	0	0	0	0	0	0	0	0	0	14.6091	14.7797	14.7634	14.7645	15.3416	15.033	0	0	0	0	0	0	0	0	0	0	0	0	0	0	0	0	0	0	0	0	0	0	0	0	0	0	0	0	0	0	14.6223
QKI	0	0	0	0	0	0	0	0	0	0	0	0	12.3829	11.5384	11.8492	12.2451	11.7657	11.9046	0	0	0	0	0	0	0	10.3087	11.1855	6.24922	11.0319	9.65495	0	12.3552	12.624	0	0	0	0	0	0	0	0	0	0	0	0	10.1613	13.2283	11.7417	11.0566
RAB3A	0	0	0	0	0	0	0	0	0	0	0	0	12.2887	0	12.1409	0	0	0	0	0	0	0	0	0	0	0	0	0	0	0	0	0	0	0	0	0	0	0	0	0	0	0	0	0	0	0	0	0	0
RPS12	0	0	0	0	0	0	0	0	0	0	0	0	17.8812	17.2679	17.0028	0	0	0	0	0	0	0	0	0	17.2415	17.2804	17.2225	0	0	0	17.3553	18.026	17.2638	0	0	0	0	0	0	0	0	0	0	0	0	0	0	0	16.9951
SNF8	0	0	0	0	0	0	0	0	0	0	0	0	9.27901	10.0871	9.81883	9.89298	9.54926	9.99755	0	0	0	0	0	0	10.309	9.9952	9.91232	11.2515	9.94615	10.5865	0	0	0	0	10.3896	10.0977	0	0	0	0	0	0	0	0	0	9.97785	11.0551	9.9343	0
SNRPA1	0	0	0	0	0	0	0	0	0	0	0	0	16.6357	15.4925	16.0481	0	0	0	0	0	0	0	0	0	15.9785	15.9758	15.9158	0	0	0	16.2007	16.4684	16.5523	0	0	0	0	0	0	0	0	0	0	0	0	15.8553	16.1717	16.0393	15.6629
SNRPF	0	0	0	0	0	0	0	0	0	0	0	0	16.6427	15.9336	15.9942	16.0023	15.825	16.0064	16.458	15.3814	15.6317	0	0	0	15.7713	16.0783	16.1353	0	0	0	16.4032	16.152	16.1082	0	0	0	0	0	0	0	0	0	0	0	0	16.11	16.1606	16.3069	16.0233
SRSF9	0	0	0	0	0	0	0	0	0	0	0	0	10.9713	10.3362	9.40755	10.9316	0	10.1611	0	0	0	0	0	0	10.3506	10.6134	10.4061	12.5003	10.6663	11.9882	0	0	0	0	0	0	0	0	0	0	0	0	0	0	0	11.7243	11.2253	11.6354	0
SYNRG	0	0	0	0	0	0	0	0	0	0	0	0	10.468	11.4042	10.9334	10.8129	9.76699	10.4965	0	0	0	0	0	0	0	0	0	0	0	0	0	0	0	0	0	0	0	0	0	0	0	0	0	0	0	10.3954	10.7778	10.5763	10.4381
TRIP4	0	0	0	0	0	0	0	0	0	0	0	0	11.8034	11.4529	12.5206	11.8509	11.6918	11.8984	0	0	0	0	0	0	0	11.381	12.0642	11.0262	12.0725	11.6892	0	0	0	0	0	0	0	0	0	0	0	0	0	0	0	11.4575	12.4186	12.4179	0
UCHL5	0	0	0	0	0	0	0	0	0	0	0	0	11.5787	11.6716	11.6869	11.5574	11.94	11.8601	0	0	0	0	11.1835	11.9091	11.8006	11.4407	11.8764	0	0	0	0	0	0	0	0	0	0	0	0	0	0	0	0	0	0	11.164	11.8877	11.6897	10.8781
WTAP	0	0	0	0	0	0	0	0	0	0	0	0	14.3777	13.4501	13.7283	13.739	14.1104	13.7742	0	0	0	0	0	0	13.9518	14.0832	14.1926	0	0	0	0	0	0	0	0	0	0	0	0	0	0	0	0	0	0	13.1779	14.5769	14.0461	12.9831
CSDE1	0	0	0	0	0	0	0	0	0	0	0	0	0	11.5926	9.7967	0	0	0	0	11.4638	10.8514	0	10.2106	11.8806	0	9.73893	10.6284	9.14179	10.7554	10.2269	0	0	0	0	0	0	0	0	0	0	0	0	0	0	0	0	0	0	0
EHD4	0	0	0	0	0	0	0	0	0	0	0	0	0	9.77218	10.2259	0	0	0	0	0	0	0	0	0	9.08649	10.4295	11.1448	0	0	0	0	0	0	0	0	0	0	0	0	0	0	0	0	0	0	0	0	0	0
HDAC2	0	0	0	0	0	0	0	0	0	0	0	0	0	10.5637	9.78563	0	11.5577	9.88724	0	0	0	0	0	0	0	9.87359	11.3778	9.86905	9.80411	8.30294	0	0	0	0	0	0	0	0	0	0	0	0	0	0	0	0	0	0	0
MRPS9	0	0	0	0	0	0	0	0	0	0	0	0	0	9.10914	9.22325	0	0	0	0	0	0	0	0	0	0	0	0	0	0	0	0	0	0	0	10.8156	9.02735	10.1068	12.2172	12.925	0	0	0	0	0	0	0	0	0	0
MVK	0	0	0	0	0	0	0	0	0	0	0	0	0	11.8535	11.6426	11.0167	11.5571	11.3138	0	11.7003	11.1043	0	12.4859	11.9297	0	11.2053	11.9147	0	11.6996	11.1038	0	0	0	0	0	0	0	0	0	10.8574	0	10.7742	11.2347	0	11.0166	11.9271	10.8422	11.6799	11.7483
MYL9	0	0	0	0	0	0	0	0	0	0	0	0	0	10.151	10.2888	0	0	0	0	9.87133	10.3131	0	0	0	0	0	0	10.66	9.41496	10.317	0	0	0	0	0	0	0	0	0	0	0	0	10.8815	0	10.6386	0	11.1057	10.289	0
NMD3	0	0	0	0	0	0	0	0	0	0	0	0	0	10.9899	11.0213	0	0	0	0	0	0	0	0	0	0	0	0	0	0	0	0	0	0	0	0	0	0	0	0	0	0	0	0	0	0	0	0	0	0
PSAT1	0	0	0	0	0	0	0	0	0	0	0	0	0	10.0882	8.7838	0	0	0	0	0	0	0	10.3978	11.3788	0	0	0	0	10.1128	9.68789	0	0	0	0	0	0	0	0	0	11.2377	0	9.92881	10.5279	0	10.7356	0	0	0	0
PSMD10	0	0	0	0	0	0	0	0	0	0	0	0	0	10.4937	10.8344	10.1795	10.675	10.3291	0	0	0	0	10.2068	10.1387	0	9.65249	10.3006	0	10.4476	9.87043	0	0	0	0	0	0	0	9.29963	9.30195	0	0	0	0	0	0	0	0	0	0
PSMG1	0	0	0	0	0	0	0	0	0	0	0	0	0	9.97095	9.65885	9.49789	10.7895	9.09112	0	12.6192	11.8494	0	11.6071	11.8354	0	0	0	9.16581	10.5866	10.1527	0	0	0	0	0	0	0	0	0	0	0	0	10.6465	0	12.265	0	0	0	0
RRM2	0	0	0	0	0	0	0	0	0	0	0	0	0	10.913	10.0296	0	0	0	0	0	0	0	12.8349	12.6143	0	0	0	0	0	0	0	0	0	0	0	0	0	0	0	11.4631	0	12.3717	11.8151	0	13.0285	10.8741	9.5694	9.56386	0
SMAP1	0	0	0	0	0	0	0	0	0	0	0	0	0	10.8848	10.5859	0	0	0	0	11.6966	11.1299	0	0	0	11.0422	10.7078	11.2405	12.655	11.1161	12.0965	0	0	0	0	0	0	0	0	0	0	0	0	11.6234	0	11.5469	0	0	0	0
SMYD2	0	0	0	0	0	0	0	0	0	0	0	0	0	13.1406	12.3625	11.7378	12.7188	11.1077	0	0	0	0	0	0	9.85613	12.2758	13.0204	12.3864	12.7403	12.094	0	0	0	0	0	0	0	0	0	10.1953	11.2794	8.45689	0	0	0	12.2571	10.5531	10.8435	12.1297
TAB2	0	0	0	0	0	0	0	0	0	0	0	0	0	9.59798	9.0571	8.92327	11.2731	9.44303	0	0	0	0	0	0	0	8.90011	11.282	0	11.6469	9.90899	0	0	0	0	0	0	0	0	0	0	0	0	0	0	0	0	0	0	0
VTA1	0	0	0	0	0	0	0	0	0	0	0	0	0	10.8083	11.5607	0	0	0	0	0	0	0	11.3002	10.1033	0	0	0	0	0	0	0	0	0	0	0	0	0	0	0	10.0344	0	9.5603	0	0	0	0	0	0	0
ATP6V1A	0	0	0	0	0	0	0	0	0	0	0	0	0	0	0	13.8539	15.0115	14.4821	0	0	0	0	0	0	0	0	0	0	0	0	0	0	0	0	0	0	0	0	0	0	0	0	0	0	0	0	0	0	0
BANF1	0	0	0	0	0	0	0	0	0	0	0	0	0	0	0	11.3487	9.32017	0	0	9.83506	8.94878	0	11.5549	11.2205	0	0	0	7.63815	11.4255	10.5118	0	0	0	0	11.2304	11.7478	0	11.1576	11.6012	0	0	0	0	0	0	10.2802	11.4288	10.4729	0
CBX5	0	0	0	0	0	0	0	0	0	0	0	0	0	0	0	8.57103	0	8.15896	0	0	0	0	0	0	0	0	0	0	0	0	0	0	0	0	0	0	0	0	0	0	0	0	0	0	0	0	0	0	0
CDC23	0	0	0	0	0	0	0	0	0	0	0	0	0	0	0	9.30713	11.3835	10.1242	0	0	0	0	0	0	0	10.3029	11.8917	11.4531	9.31356	9.93994	0	0	0	0	0	0	0	0	0	0	0	0	0	0	0	0	0	0	0
CDK9	0	0	0	0	0	0	0	0	0	0	0	0	0	0	0	9.9842	0	9.65143	0	0	0	0	0	0	0	0	0	0	0	0	0	0	0	0	0	0	0	0	0	0	0	0	0	0	0	9.40478	10.7461	10.2124	0
CHCHD2P9	0	0	0	0	0	0	0	0	0	0	0	0	0	0	0	10.6541	8.54689	9.66919	0	0	0	0	0	0	0	0	0	0	0	0	0	0	0	0	0	0	0	0	0	0	0	0	0	0	0	0	11.723	10.5452	0
CORO1C	0	0	0	0	0	0	0	0	0	0	0	0	0	0	0	16.0317	16.5229	16.206	0	0	0	0	0	0	0	0	0	0	0	0	0	0	0	0	0	0	0	0	0	0	0	0	0	0	0	16.1772	15.999	15.9053	16.0915
CRACD	0	0	0	0	0	0	0	0	0	0	0	0	0	0	0	9.12437	9.40838	10.2123	0	0	0	0	0	0	0	0	0	0	0	0	0	11.6782	9.79285	0	0	0	0	0	0	0	0	0	0	0	0	0	0	0	0
DAD1	0	0	0	0	0	0	0	0	0	0	0	0	0	0	0	11.7547	10.1663	11.3789	0	0	0	0	0	0	0	0	0	13.88	0	13.3249	0	0	0	0	0	0	0	0	0	0	0	0	0	0	0	0	0	0	0
DHX30	0	0	0	0	0	0	0	0	0	0	0	0	0	0	0	9.88082	0	9.13336	0	0	0	0	0	0	0	0	0	10.5075	0	9.73712	0	0	0	0	0	0	0	10.9757	11.389	0	0	0	0	0	0	0	12.9355	10.5483	0
EIF2S2	0	0	0	0	0	0	0	0	0	0	0	0	0	0	0	15.5326	15.2574	15.2809	0	0	0	0	0	0	0	0	0	0	0	0	0	0	0	0	0	0	0	0	0	0	0	0	0	0	0	0	0	0	0
EIF3J	0	0	0	0	0	0	0	0	0	0	0	0	0	0	0	18.0748	18.5053	18.2652	0	0	0	0	0	0	0	0	0	0	0	0	0	0	0	0	0	0	0	0	0	0	0	0	0	0	0	0	0	0	0
EIF3L	0	0	0	0	0	0	0	0	0	0	0	0	0	0	0	17.4774	17.5491	17.5509	0	0	0	0	0	0	0	0	0	0	0	0	17.3856	17.5974	17.7793	0	0	0	0	0	0	0	0	0	0	0	0	0	0	0	17.2844
FUBP3	0	0	0	0	0	0	0	0	0	0	0	0	0	0	0	9.90551	10.9292	10.5638	0	0	0	0	0	0	0	0	0	10.7066	10.0243	11.1447	0	0	0	0	9.87878	11.2201	0	8.91174	9.26651	0	0	0	0	0	0	0	0	0	0
HIBADH	0	0	0	0	0	0	0	0	0	0	0	0	0	0	0	10.7095	0	10.4182	0	0	0	0	10.8662	9.77601	0	0	0	0	0	0	0	0	0	0	0	0	0	11.6517	10.3183	0	0	0	11.3886	0	10.8894	0	0	0	0
HS2ST1	0	0	0	0	0	0	0	0	0	0	0	0	0	0	0	10.8556	9.61917	0	0	0	0	0	0	0	0	0	0	11.5875	9.35419	10.4206	0	0	0	0	0	0	0	0	0	0	0	0	0	0	0	8.80967	10.0256	10.0624	0
IL1RL1	0	0	0	0	0	0	0	0	0	0	0	0	0	0	0	12.5541	0	10.4094	0	0	0	0	0	0	0	0	0	0	0	0	0	0	0	0	0	0	0	0	0	0	0	0	0	0	0	0	0	0	0
KCTD17	0	0	0	0	0	0	0	0	0	0	0	0	0	0	0	11.1593	0	10.8588	0	0	0	0	0	0	0	0	0	0	0	0	0	0	0	0	0	0	0	0	0	0	0	0	0	0	0	0	10.8662	10.0414	0
NECAP1	0	0	0	0	0	0	0	0	0	0	0	0	0	0	0	11.7256	10.8011	11.5196	0	0	0	0	0	0	0	0	0	0	0	0	0	0	0	0	0	0	0	0	0	0	0	0	0	0	0	11.4697	11.2711	10.8525	0
NUMB	0	0	0	0	0	0	0	0	0	0	0	0	0	0	0	9.46097	11.207	10.2203	0	0	0	0	0	0	0	0	0	0	0	0	0	0	0	0	0	0	0	11.5235	10.3727	0	0	0	0	0	0	0	0	0	0
PCNT	0	0	0	0	0	0	0	0	0	0	0	0	0	0	0	10.4749	12.5782	12.6435	0	0	0	0	0	0	0	12.1984	12.1154	0	0	0	0	0	0	0	0	0	0	0	0	0	0	0	0	0	0	12.3723	10.3251	11.6441	12.7451
PSMD14	0	0	0	0	0	0	0	0	0	0	0	0	0	0	0	14.909	16.158	15.5207	0	0	0	0	0	0	0	0	0	0	0	0	0	0	0	0	0	0	0	0	0	0	0	0	0	0	0	0	0	0	0
PSMD3	0	0	0	0	0	0	0	0	0	0	0	0	0	0	0	14.8854	15.6534	15.3479	0	0	0	0	0	0	0	0	0	0	0	0	0	0	0	0	0	0	0	0	0	0	0	0	0	0	0	0	0	0	0
PSMD9	0	0	0	0	0	0	0	0	0	0	0	0	0	0	0	8.01078	11.3001	10.0179	0	0	0	0	11.4583	10.7457	8.96415	10.0576	9.92215	0	0	0	0	0	0	0	0	0	0	0	0	0	0	0	0	0	0	0	0	0	0
PTBP3	0	0	0	0	0	0	0	0	0	0	0	0	0	0	0	9.37682	8.96041	8.88737	0	0	0	0	0	0	0	0	0	0	11.4603	10.4593	0	0	0	0	0	0	0	0	0	0	0	0	0	0	0	0	0	0	0
RACK1	0	0	0	0	0	0	0	0	0	0	0	0	0	0	0	18.3215	18.4718	18.1357	0	0	0	0	0	0	17.9839	18.2319	18.3435	0	0	0	0	0	0	0	0	0	0	0	0	0	0	0	0	0	0	0	0	0	0
RBBP4	0	0	0	0	0	0	0	0	0	0	0	0	0	0	0	14.4176	15.8402	15.242	0	0	0	0	0	0	14.1225	15.163	15.5325	14.4001	14.7316	14.709	0	0	0	0	0	0	0	0	0	14.0713	14.9808	14.0909	0	0	0	0	0	0	0
RPS24	0	0	0	0	0	0	0	0	0	0	0	0	0	0	0	17.6682	16.7228	17.3326	0	0	0	0	0	0	0	0	0	0	0	0	17.392	17.4787	17.4871	0	0	0	0	0	0	0	0	0	0	0	0	0	0	0	0
SORT1	0	0	0	0	0	0	0	0	0	0	0	0	0	0	0	10.3299	10.4942	10.3847	0	0	0	0	0	0	0	0	0	0	0	0	0	0	0	0	0	0	0	0	0	0	0	0	0	0	0	0	0	0	0
TRIM21	0	0	0	0	0	0	0	0	0	0	0	0	0	0	0	15.0521	15.4021	15.1285	0	0	0	0	0	0	15.4402	15.3491	15.2293	0	0	0	0	0	0	0	0	0	14.9708	15.3326	14.9117	0	0	0	0	0	0	0	0	0	14.9276
UBE2D3	0	0	0	0	0	0	0	0	0	0	0	0	0	0	0	8.01809	12.1299	10.1032	0	12.5171	12.3128	0	10.935	12.4142	0	0	0	12.8863	10.0551	12.0278	0	0	0	0	0	0	0	0	0	0	0	0	0	0	0	0	0	0	0
VIM	0	0	0	0	0	0	0	0	0	0	0	0	0	0	0	8.41041	16.6478	14.7389	0	0	0	0	0	0	0	0	0	0	0	0	0	0	0	0	0	0	0	0	0	0	0	0	0	0	0	0	0	0	0
COBL	0	0	0	0	0	0	0	0	0	0	0	0	0	0	0	0	12.4398	11.7854	0	11.4122	10.692	0	0	0	0	11.4406	12.823	0	12.4463	11.6745	0	0	0	0	0	0	0	0	0	0	0	0	0	0	0	0	0	0	11.2903
H1-3	0	0	0	0	0	0	0	0	0	0	0	0	0	0	0	0	12.0247	10.3925	0	0	0	0	0	0	0	12.5352	13.7529	15.0874	12.0122	13.8454	0	14.4515	13.2857	0	0	0	0	0	0	0	0	0	0	0	0	7.8485	14.2435	12.5411	0
HSP90AB4P	0	0	0	0	0	0	0	0	0	0	0	0	0	0	0	0	9.92291	8.94467	0	9.83779	9.59556	0	0	0	0	0	0	0	0	0	0	0	0	0	0	0	0	0	0	0	0	0	0	0	0	0	0	0	0
SH3BGRL	0	0	0	0	0	0	0	0	0	0	0	0	0	0	0	0	11.483	9.76618	0	10.442	10.4384	0	10.0133	11.3055	0	0	0	0	0	0	0	0	0	0	0	0	0	0	0	0	0	0	0	0	0	0	0	0	0
SMARCC1	0	0	0	0	0	0	0	0	0	0	0	0	0	0	0	0	11.0175	9.37514	0	0	0	0	0	0	0	0	0	0	0	0	0	0	0	0	0	0	0	0	0	0	0	0	0	0	0	0	0	0	0
CSE1L	0	0	0	0	0	0	0	0	0	0	0	0	0	0	0	0	0	0	13.3746	14.6448	14.4533	13.4825	14.9804	15.2496	0	0	0	0	0	0	0	0	0	0	15.2277	15.8232	0	0	0	0	0	0	0	0	0	0	0	0	0
DLG1	0	0	0	0	0	0	0	0	0	0	0	0	0	0	0	0	0	0	13.4423	0	11.4308	13.9896	0	11.3951	0	0	0	0	0	0	0	0	0	0	0	0	0	0	0	0	0	0	0	0	0	0	0	0	0
FKBP2	0	0	0	0	0	0	0	0	0	0	0	0	0	0	0	0	0	0	11.8792	12.3292	12.4358	12.6778	0	12.4982	12.4227	12.3145	12.3948	11.195	11.4548	12.0528	12.4849	13.6885	13.3496	0	0	0	0	0	0	0	0	0	0	0	0	11.0977	13.7681	13.3406	0
GOT2	0	0	0	0	0	0	0	0	0	0	0	0	0	0	0	0	0	0	13.9907	14.3924	14.3554	0	0	0	0	0	0	0	0	0	0	0	0	0	0	0	0	0	0	0	0	0	0	0	0	0	0	0	0
GSTP1	0	0	0	0	0	0	0	0	0	0	0	0	0	0	0	0	0	0	16.0318	17.8872	17.5542	15.7141	18.263	18.3694	0	0	0	0	0	0	0	0	0	0	0	0	0	0	0	0	0	0	18.0738	14.5152	17.7836	0	0	0	0
KTI12	0	0	0	0	0	0	0	0	0	0	0	0	0	0	0	0	0	0	13.2573	0	10.5522	14.3936	0	12.8726	0	0	0	0	0	0	0	0	0	0	0	0	0	0	0	0	0	0	0	0	0	0	0	0	0
NASP	0	0	0	0	0	0	0	0	0	0	0	0	0	0	0	0	0	0	13.3968	15.4284	15.3599	12.7256	16.098	15.754	0	0	0	0	0	0	0	0	0	0	0	0	0	0	0	0	0	0	0	0	0	0	0	0	0
PFAS	0	0	0	0	0	0	0	0	0	0	0	0	0	0	0	0	0	0	15.4736	13.6418	14.0385	14.7436	12.6142	14.3021	0	0	0	0	0	0	0	0	0	0	0	0	15.0638	12.7949	10.0189	0	0	0	13.3429	12.2103	13.5994	0	0	0	0
SLC2A3	0	0	0	0	0	0	0	0	0	0	0	0	0	0	0	0	0	0	12.9257	14.8769	14.3667	0	0	0	0	0	0	15.8406	11.9469	15.0079	0	0	0	0	14.747	15.1785	0	0	0	0	0	0	0	0	0	0	0	0	0
TUBA1B	0	0	0	0	0	0	0	0	0	0	0	0	0	0	0	0	0	0	18.0844	17.9404	17.9078	18.1403	17.9811	18.1666	0	0	0	18.8135	17.2973	18.2397	0	0	0	0	0	0	0	0	0	0	0	0	18.4318	17.1256	18.3108	0	0	0	0
TUBB8	0	0	0	0	0	0	0	0	0	0	0	0	0	0	0	0	0	0	15.4504	16.1996	16.2332	0	0	0	0	0	0	0	0	0	0	0	0	0	0	0	0	0	0	0	0	0	0	0	0	0	0	0	0
ADH5	0	0	0	0	0	0	0	0	0	0	0	0	0	0	0	0	0	0	0	11.758	11.4083	0	13.0917	13.1378	0	0	0	0	0	0	0	0	0	0	0	0	0	8.16804	8.04034	11.0053	0	10.5725	12.905	0	12.1477	0	0	0	0
ADSS2	0	0	0	0	0	0	0	0	0	0	0	0	0	0	0	0	0	0	0	11.4241	10.3204	0	12.3429	12.0868	0	0	0	0	0	0	0	0	0	0	0	0	0	0	0	11.4879	0	10.861	12.3568	0	12.0925	0	0	0	0
AGMAT	0	0	0	0	0	0	0	0	0	0	0	0	0	0	0	0	0	0	0	9.13387	10.1516	0	11.8039	10.5795	0	0	0	0	0	0	0	0	0	0	0	0	0	0	0	0	0	0	10.6015	0	10.1838	0	0	0	0
AKR1A1	0	0	0	0	0	0	0	0	0	0	0	0	0	0	0	0	0	0	0	12.3713	12.1313	0	12.5083	13.1091	0	0	0	0	0	0	0	0	0	0	9.68803	10.2313	0	9.23213	10.3005	9.5374	0	11.8352	11.2285	0	12.1459	0	0	0	0
ALDH1B1	0	0	0	0	0	0	0	0	0	0	0	0	0	0	0	0	0	0	0	9.71884	9.54718	0	11.709	11.4927	0	0	0	0	0	0	0	0	0	0	0	0	0	0	0	9.13339	0	10.0034	11.2703	0	10.5716	0	0	0	0
ATL2	0	0	0	0	0	0	0	0	0	0	0	0	0	0	0	0	0	0	0	10.8969	10.1024	0	9.93057	11.09	0	0	0	0	0	0	0	0	0	0	0	0	0	0	0	0	0	0	0	0	0	0	0	0	0
BCAT1	0	0	0	0	0	0	0	0	0	0	0	0	0	0	0	0	0	0	0	10.8573	10.4771	0	12.8001	12.5984	0	0	0	0	0	0	0	0	0	0	0	0	0	0	0	0	0	0	10.6274	0	9.23292	0	0	0	0
BCCIP	0	0	0	0	0	0	0	0	0	0	0	0	0	0	0	0	0	0	0	13.8214	13.4643	0	14.8733	14.4883	0	0	0	0	0	0	0	0	0	0	0	0	0	13.8752	13.4937	0	0	0	13.8853	0	13.211	0	0	0	0
CAMK2B	0	0	0	0	0	0	0	0	0	0	0	0	0	0	0	0	0	0	0	12.786	11.6302	0	11.253	10.8078	0	0	0	10.5965	8.82432	9.01454	0	0	0	0	8.03719	9.89769	0	11.2416	11.0936	12.4757	0	12.1201	0	0	0	0	0	0	0
CAPN2	0	0	0	0	0	0	0	0	0	0	0	0	0	0	0	0	0	0	0	11.5736	10.9802	0	10.9779	11.9522	0	0	0	0	0	0	0	0	0	0	0	0	0	0	0	0	0	0	9.94729	0	10.9365	0	0	0	0
CARHSP1	0	0	0	0	0	0	0	0	0	0	0	0	0	0	0	0	0	0	0	11.4577	10.5735	0	12.6493	12.3903	0	0	0	0	0	0	0	0	0	0	0	0	0	11.0148	10.2346	0	0	0	11.1543	0	10.7398	0	0	0	0
CAT	0	0	0	0	0	0	0	0	0	0	0	0	0	0	0	0	0	0	0	9.45548	8.99733	0	13.2327	11.3618	0	0	0	0	0	0	0	0	0	0	0	0	0	9.1326	7.37274	0	0	0	0	0	0	0	0	0	0
CHMP1A	0	0	0	0	0	0	0	0	0	0	0	0	0	0	0	0	0	0	0	10.9141	10.0088	0	0	0	0	0	0	11.2452	11.0467	11.1389	0	0	0	0	0	0	0	0	0	9.6021	0	10.4102	0	0	0	0	0	0	0
CLTA	0	0	0	0	0	0	0	0	0	0	0	0	0	0	0	0	0	0	0	13.336	12.5073	0	13.0044	12.6071	0	0	0	12.6992	0	11.0747	0	0	0	0	10.3044	8.42943	0	13.077	12.7	0	0	0	0	0	0	0	0	0	0
CLUH	0	0	0	0	0	0	0	0	0	0	0	0	0	0	0	0	0	0	0	10.1153	9.63127	0	10.8462	10.7913	0	0	0	0	0	0	0	0	0	0	0	0	0	9.37961	9.64019	9.50235	0	11.1137	10.2185	0	10.8752	0	0	0	0
CNPY2	0	0	0	0	0	0	0	0	0	0	0	0	0	0	0	0	0	0	0	11.7471	10.8622	0	11.8716	12.758	0	0	0	0	0	0	0	0	0	0	0	0	0	0	0	0	0	0	9.50804	0	9.15898	0	0	0	0
COMT	0	0	0	0	0	0	0	0	0	0	0	0	0	0	0	0	0	0	0	10.5911	9.7958	0	12.7157	12.7691	0	0	0	0	0	0	0	0	0	0	0	0	0	10.8199	10.6582	0	0	0	11.1049	0	11.2041	0	0	0	0
CRABP1	0	0	0	0	0	0	0	0	0	0	0	0	0	0	0	0	0	0	0	11.2356	11.4779	0	11.9279	11.8928	0	0	0	0	0	0	0	0	0	0	0	0	0	0	0	0	0	0	10.794	0	11.5692	0	0	0	0
DDAH2	0	0	0	0	0	0	0	0	0	0	0	0	0	0	0	0	0	0	0	11.6572	11.0233	0	12.0608	12.4878	0	0	0	0	0	0	0	0	0	0	0	0	0	0	0	0	0	0	0	0	0	0	0	0	0
DPP8	0	0	0	0	0	0	0	0	0	0	0	0	0	0	0	0	0	0	0	10.9972	10.1056	0	11.3129	11.3186	0	0	0	0	0	0	0	0	0	0	0	0	0	0	0	0	0	0	0	0	0	0	0	0	0
DPP9	0	0	0	0	0	0	0	0	0	0	0	0	0	0	0	0	0	0	0	9.97978	10.8762	0	11.4903	11.3152	0	0	0	0	0	0	0	0	0	0	0	0	0	0	0	9.68999	0	10.3909	9.84637	0	10.2276	0	0	0	0
ECHDC1	0	0	0	0	0	0	0	0	0	0	0	0	0	0	0	0	0	0	0	9.91014	10.5451	0	11.1594	11.7756	0	0	0	0	0	0	0	0	0	0	8.78978	10.1086	0	10.1089	9.611	0	0	0	0	0	0	0	0	0	0
FABP5	0	0	0	0	0	0	0	0	0	0	0	0	0	0	0	0	0	0	0	12.8464	12.3801	0	12.1507	13.2658	9.04595	8.72533	9.71356	11.9031	8.59074	11.121	0	0	0	0	0	0	0	0	0	11.849	0	11.4675	13.2263	0	13.1079	0	0	0	0
GALM	0	0	0	0	0	0	0	0	0	0	0	0	0	0	0	0	0	0	0	11.9068	10.7124	0	12.4172	12.829	0	0	0	0	0	0	0	0	0	0	0	0	0	0	0	0	0	0	11.1031	0	11.2857	0	0	0	0
HLA-C	0	0	0	0	0	0	0	0	0	0	0	0	0	0	0	0	0	0	0	10.561	10.3813	0	0	0	0	0	0	12.6613	0	11.2306	0	0	0	0	0	0	0	0	0	10.4341	0	10.6422	10.7705	0	10.806	0	0	0	0
HPRT1	0	0	0	0	0	0	0	0	0	0	0	0	0	0	0	0	0	0	0	11.3538	10.7254	0	12.1865	12.2321	0	0	0	0	0	0	0	0	0	0	0	0	0	0	0	11.3744	0	10.0656	12.359	0	11.6035	0	0	0	0
ISOC1	0	0	0	0	0	0	0	0	0	0	0	0	0	0	0	0	0	0	0	9.5302	9.43282	0	11.3927	11.2814	0	0	0	0	0	0	0	0	0	0	0	0	0	0	0	0	0	0	10.1122	0	9.41678	0	0	0	0
ITGB1	0	0	0	0	0	0	0	0	0	0	0	0	0	0	0	0	0	0	0	9.67684	9.78884	0	8.54458	9.37397	0	0	0	12.9456	0	11.7903	0	0	0	0	0	0	0	0	0	10.4163	0	9.79768	0	0	0	0	0	0	0
ITPR3	0	0	0	0	0	0	0	0	0	0	0	0	0	0	0	0	0	0	0	12.5999	10.1349	0	11.1168	9.48583	0	0	0	0	0	0	0	0	0	0	7.5378	6.67356	0	12.3043	10.7886	10.0509	0	8.59255	0	0	0	0	0	0	0
LYPLA1	0	0	0	0	0	0	0	0	0	0	0	0	0	0	0	0	0	0	0	10.3228	10.8321	0	0	0	0	0	0	0	0	0	0	0	0	0	0	0	0	0	0	0	0	0	0	0	0	0	0	0	0
PAFAH1B2	0	0	0	0	0	0	0	0	0	0	0	0	0	0	0	0	0	0	0	12.1116	11.7075	0	11.6703	11.8874	0	0	0	0	0	0	0	0	0	0	0	0	0	0	0	0	0	0	0	0	0	0	0	0	0
PDZK1	0	0	0	0	0	0	0	0	0	0	0	0	0	0	0	0	0	0	0	10.3716	9.75535	0	9.34814	10.4256	0	0	0	0	0	0	0	0	0	0	0	0	0	9.66873	8.95865	0	0	0	0	0	0	0	0	0	0
POFUT1	0	0	0	0	0	0	0	0	0	0	0	0	0	0	0	0	0	0	0	11.6855	10.2063	0	12.8776	11.8538	0	0	0	0	0	0	0	0	0	0	0	0	0	0	0	9.54651	0	6.78014	11.1543	0	10.5568	0	0	0	0
POLD3	0	0	0	0	0	0	0	0	0	0	0	0	0	0	0	0	0	0	0	10.2802	9.72999	0	10.8263	10.3207	0	0	0	11.2498	0	9.79937	0	0	0	0	0	0	0	0	0	0	0	0	0	0	0	0	0	0	0
PPME1	0	0	0	0	0	0	0	0	0	0	0	0	0	0	0	0	0	0	0	11.4938	10.2553	0	12.2017	12.4286	0	0	0	0	0	0	0	0	0	0	0	0	0	11.6174	9.1393	10.5463	0	10.7586	12.2211	0	11.6903	0	0	0	0
PPP3CA	0	0	0	0	0	0	0	0	0	0	0	0	0	0	0	0	0	0	0	10.9143	10.6043	0	10.823	11.6192	0	0	0	0	0	0	0	0	0	0	0	0	0	11.673	9.95984	0	0	0	10.0685	0	10.4827	0	0	0	0
PREP	0	0	0	0	0	0	0	0	0	0	0	0	0	0	0	0	0	0	0	10.322	8.04459	8.09592	12.9273	12.2438	0	0	0	0	0	0	0	0	0	0	0	0	0	9.72188	9.55833	0	0	0	12.1533	0	10.6499	0	0	0	0
PSPH	0	0	0	0	0	0	0	0	0	0	0	0	0	0	0	0	0	0	0	11.5896	10.946	0	12.602	12.2949	0	0	0	0	0	0	0	0	0	0	0	0	0	0	0	10.3417	0	9.61453	11.8734	0	10.5551	0	0	0	0
RAB2A	0	0	0	0	0	0	0	0	0	0	0	0	0	0	0	0	0	0	0	11.2899	9.84214	0	11.4904	11.8166	0	0	0	14.0997	0	12.7041	0	0	0	0	10.6422	12.688	0	13.5103	12.1118	0	0	0	12.4896	0	11.3904	0	0	0	0
RPRD1B	0	0	0	0	0	0	0	0	0	0	0	0	0	0	0	0	0	0	0	8.3776	8.94295	0	12.4074	11.9564	0	0	0	9.06283	0	8.52266	0	0	0	0	8.96913	7.1574	0	11.7125	9.91212	0	0	0	11.1054	0	8.87978	0	0	0	0
SEC24D	0	0	0	0	0	0	0	0	0	0	0	0	0	0	0	0	0	0	0	10.9877	10.123	0	11.3204	12.0424	0	0	0	0	0	0	0	0	0	0	0	0	0	0	0	0	0	0	0	0	0	0	0	0	0
SERPINB6	0	0	0	0	0	0	0	0	0	0	0	0	0	0	0	0	0	0	0	11.0807	10.1948	0	12.2705	12.2296	0	0	0	0	0	0	0	0	0	0	0	0	0	0	0	11.3062	0	11.0881	12.0821	0	11.8115	0	0	0	0
SGTA	0	0	0	0	0	0	0	0	0	0	0	0	0	0	0	0	0	0	0	10.3809	9.93362	0	12.3478	12.284	0	0	0	0	0	0	0	0	0	0	0	0	0	9.90652	10.0621	0	0	0	10.111	0	10.1287	0	0	0	0
SH3GL1	0	0	0	0	0	0	0	0	0	0	0	0	0	0	0	0	0	0	0	10.8989	10.0266	0	12.3825	11.8575	0	0	0	0	0	0	0	0	0	0	0	0	0	0	0	0	0	0	11.823	0	9.9901	0	0	0	0
SPINT1	0	0	0	0	0	0	0	0	0	0	0	0	0	0	0	0	0	0	0	10.4818	10.4213	0	0	0	0	0	0	0	0	0	0	0	0	0	0	0	0	0	0	0	0	0	0	0	0	0	0	0	0
STMN2	0	0	0	0	0	0	0	0	0	0	0	0	0	0	0	0	0	0	0	10.2328	11.2396	0	11.9887	12.6807	0	0	0	0	0	0	0	0	0	0	0	0	0	0	0	0	0	0	11.0175	0	8.99414	0	0	0	0
TPD52L2	0	0	0	0	0	0	0	0	0	0	0	0	0	0	0	0	0	0	0	12.8773	12.9841	0	13.8787	14.1663	0	0	0	0	0	0	0	0	0	0	0	0	0	10.793	10.1265	0	0	0	11.3741	0	10.5177	0	0	0	0
TPRN	0	0	0	0	0	0	0	0	0	0	0	0	0	0	0	0	0	0	0	11.706	10.8616	0	11.4533	11.0029	0	0	0	0	0	0	0	0	0	0	0	0	0	0	0	0	0	0	0	0	0	0	0	0	0
TSG101	0	0	0	0	0	0	0	0	0	0	0	0	0	0	0	0	0	0	0	10.2495	9.80524	0	0	0	0	0	0	0	0	0	0	0	0	0	0	0	0	11.9993	11.1346	0	0	0	0	0	0	0	0	0	0
UBE2C	0	0	0	0	0	0	0	0	0	0	0	0	0	0	0	0	0	0	0	9.77814	9.38502	0	10.932	11.3189	0	0	0	0	0	0	0	0	0	0	0	0	0	0	0	0	0	0	10.3734	0	11.7733	0	0	0	0
UBE2N	0	0	0	0	0	0	0	0	0	0	0	0	0	0	0	0	0	0	0	14.3347	13.5346	0	14.9608	14.6297	0	0	0	0	0	0	0	0	0	0	0	0	0	0	0	0	0	0	0	0	0	0	0	0	0
UCHL1	0	0	0	0	0	0	0	0	0	0	0	0	0	0	0	0	0	0	0	9.73531	11.4016	0	13.1182	11.8625	0	0	0	0	0	0	0	0	0	0	0	0	0	11.6782	10.6331	0	0	0	11.3119	0	9.97238	0	0	0	0
VPS29	0	0	0	0	0	0	0	0	0	0	0	0	0	0	0	0	0	0	0	9.68923	9.94335	0	11.6133	10.3729	0	0	0	0	0	0	0	0	0	0	0	0	0	0	0	0	0	0	0	0	0	0	0	0	0
ZC3H6	0	0	0	0	0	0	0	0	0	0	0	0	0	0	0	0	0	0	0	11.5878	11.2466	0	0	0	0	0	0	0	0	0	0	0	0	0	0	0	0	0	0	0	0	0	11.0852	0	10.8274	0	0	0	0
ACLY	0	0	0	0	0	0	0	0	0	0	0	0	0	0	0	0	0	0	0	0	0	12.0265	14.823	14.7328	0	0	0	0	0	0	0	0	0	0	0	0	0	0	0	0	0	0	0	0	0	0	0	0	0
CAND1	0	0	0	0	0	0	0	0	0	0	0	0	0	0	0	0	0	0	0	0	0	11.2639	14.7044	14.5994	0	0	0	0	0	0	0	0	0	0	0	0	0	0	0	0	0	0	0	0	0	0	0	0	0
DDX19A	0	0	0	0	0	0	0	0	0	0	0	0	0	0	0	0	0	0	0	0	0	9.96393	13.2007	13.1872	0	0	0	0	0	0	0	0	0	0	0	0	0	0	0	0	0	0	12.8689	0	12.4648	0	0	0	0
EIF6	0	0	0	0	0	0	0	0	0	0	0	0	0	0	0	0	0	0	0	0	0	14.7291	15.4234	15.445	0	0	0	0	0	0	0	0	0	0	0	0	0	0	0	0	0	0	0	0	0	0	0	0	0
GPI	0	0	0	0	0	0	0	0	0	0	0	0	0	0	0	0	0	0	0	0	0	13.6516	16.4776	15.892	0	0	0	0	0	0	0	0	0	0	0	0	0	0	0	15.8019	13.9794	15.261	16.2037	13.166	15.6281	0	0	0	0
HAGH	0	0	0	0	0	0	0	0	0	0	0	0	0	0	0	0	0	0	0	0	0	11.8483	8.9443	10.4578	11.2123	9.94283	0	0	0	0	0	0	0	0	0	0	0	0	0	0	0	0	0	0	0	0	0	0	0
PDIA3	0	0	0	0	0	0	0	0	0	0	0	0	0	0	0	0	0	0	0	0	0	8.00332	15.8833	16.1059	0	0	0	0	0	0	0	0	0	0	0	0	0	0	0	0	0	0	15.1861	11.9509	15.129	0	0	0	0
PGAM1	0	0	0	0	0	0	0	0	0	0	0	0	0	0	0	0	0	0	0	0	0	9.1823	15.7923	15.5133	0	0	0	0	0	0	0	0	0	0	0	0	0	0	0	0	0	0	0	0	0	0	0	0	0
PKM	0	0	0	0	0	0	0	0	0	0	0	0	0	0	0	0	0	0	0	0	0	15.1539	16.4893	16.2266	0	0	0	0	0	0	0	0	0	0	0	0	0	0	0	0	0	0	0	0	0	0	0	0	0
RARS1	0	0	0	0	0	0	0	0	0	0	0	0	0	0	0	0	0	0	0	0	0	11.9887	14.2061	13.8505	0	0	0	0	0	0	0	0	0	0	0	0	0	0	0	0	0	0	14.3628	9.69619	14.0146	0	0	0	0
RPL17	0	0	0	0	0	0	0	0	0	0	0	0	0	0	0	0	0	0	0	0	0	15.3632	13.8644	13.643	0	0	0	0	0	0	0	0	0	0	0	0	13.4083	14.7262	14.6238	0	0	0	0	0	0	0	0	0	0
SRSF2	0	0	0	0	0	0	0	0	0	0	0	0	0	0	0	0	0	0	0	0	0	14.5026	15.2091	13.9107	15.1437	14.829	14.4278	14.8375	14.409	14.85	0	0	0	0	0	0	14.0217	14.9998	14.8485	0	0	0	0	0	0	0	0	0	0
AAGAB	0	0	0	0	0	0	0	0	0	0	0	0	0	0	0	0	0	0	0	0	0	0	10.4688	10.5125	0	0	0	0	0	0	0	0	0	0	0	0	0	0	0	0	0	0	0	0	0	0	0	0	0
ABHD14B	0	0	0	0	0	0	0	0	0	0	0	0	0	0	0	0	0	0	0	0	0	0	10.3323	10.2142	0	0	0	0	0	0	0	0	0	0	0	0	0	0	0	0	0	0	0	0	0	0	0	0	0
ACO1	0	0	0	0	0	0	0	0	0	0	0	0	0	0	0	0	0	0	0	0	0	0	12.5219	11.466	0	0	0	0	0	0	0	0	0	0	0	0	0	13.7766	13.2079	0	0	0	0	0	0	0	0	0	0
ACSF2	0	0	0	0	0	0	0	0	0	0	0	0	0	0	0	0	0	0	0	0	0	0	11.1303	10.3279	0	0	0	0	0	0	0	0	0	0	0	0	0	0	0	0	0	0	0	0	0	0	0	0	0
ACY1	0	0	0	0	0	0	0	0	0	0	0	0	0	0	0	0	0	0	0	0	0	0	11.4736	11.0519	0	0	0	0	0	0	0	0	0	0	0	0	0	0	0	0	0	0	10.2822	0	10.403	0	0	0	0
ADD3	0	0	0	0	0	0	0	0	0	0	0	0	0	0	0	0	0	0	0	0	0	0	10.4148	12.0229	0	0	0	0	0	0	0	0	0	0	0	0	0	0	0	9.68627	0	9.58502	11.251	0	10.4732	0	0	0	0
ADI1	0	0	0	0	0	0	0	0	0	0	0	0	0	0	0	0	0	0	0	0	0	0	9.75149	10.8077	0	0	0	0	0	0	0	0	0	0	0	0	0	0	0	0	0	0	10.2204	0	8.98168	0	0	0	0
AIP	0	0	0	0	0	0	0	0	0	0	0	0	0	0	0	0	0	0	0	0	0	0	12.4045	11.9425	0	0	0	0	0	0	0	0	0	0	0	0	0	10.675	10.1171	0	0	0	0	0	0	0	0	0	0
AKR1B1	0	0	0	0	0	0	0	0	0	0	0	0	0	0	0	0	0	0	0	0	0	0	9.70568	11.7633	0	0	0	0	0	0	0	0	0	0	0	0	0	0	0	0	0	0	11.4251	0	10.8217	0	0	0	0
AKR1C3	0	0	0	0	0	0	0	0	0	0	0	0	0	0	0	0	0	0	0	0	0	0	10.1751	9.28088	0	0	0	0	0	0	0	0	0	0	0	0	0	0	0	0	0	0	0	0	0	0	0	0	0
AKR7A2	0	0	0	0	0	0	0	0	0	0	0	0	0	0	0	0	0	0	0	0	0	0	12.4649	12.2249	0	0	0	0	0	0	0	0	0	0	0	0	0	0	0	10.5954	0	9.37743	10.3407	0	10.2194	0	0	0	0
ALAD	0	0	0	0	0	0	0	0	0	0	0	0	0	0	0	0	0	0	0	0	0	0	10.4185	10.2747	0	0	0	0	0	0	0	0	0	0	0	0	0	0	0	0	0	0	0	0	0	0	0	0	0
AMACR	0	0	0	0	0	0	0	0	0	0	0	0	0	0	0	0	0	0	0	0	0	0	10.9704	11.0664	0	0	0	0	0	0	0	0	0	0	0	0	0	11.0834	10.3978	0	0	0	0	0	0	0	0	0	0
ANK3	0	0	0	0	0	0	0	0	0	0	0	0	0	0	0	0	0	0	0	0	0	0	14.0613	14.323	0	0	0	0	0	0	0	0	0	0	0	0	0	0	0	0	0	0	0	0	0	0	0	0	0
ARAP1	0	0	0	0	0	0	0	0	0	0	0	0	0	0	0	0	0	0	0	0	0	0	9.03334	7.9143	0	0	0	0	0	0	0	0	0	0	0	0	0	0	0	0	0	0	0	0	0	0	0	0	0
ARFIP1	0	0	0	0	0	0	0	0	0	0	0	0	0	0	0	0	0	0	0	0	0	0	10.743	10.694	0	0	0	0	0	0	0	0	0	0	0	0	0	8.30652	8.55211	0	0	0	9.10839	0	9.88898	0	0	0	0
ARFIP2	0	0	0	0	0	0	0	0	0	0	0	0	0	0	0	0	0	0	0	0	0	0	10.4862	8.90947	0	0	0	0	0	0	0	0	0	0	0	0	0	0	0	0	0	0	0	0	0	0	0	0	0
ARHGAP1	0	0	0	0	0	0	0	0	0	0	0	0	0	0	0	0	0	0	0	0	0	0	12.4221	11.6093	0	0	0	0	0	0	0	0	0	0	0	0	0	8.92764	8.87646	0	0	0	10.6426	0	9.88598	0	0	0	0
ARHGEF1	0	0	0	0	0	0	0	0	0	0	0	0	0	0	0	0	0	0	0	0	0	0	12.2645	10.5079	0	0	0	0	0	0	0	0	0	0	0	0	0	10.2585	9.65485	0	0	0	0	0	0	0	0	0	0
ARL15	0	0	0	0	0	0	0	0	0	0	0	0	0	0	0	0	0	0	0	0	0	0	10.6801	9.3752	0	0	0	0	0	0	0	0	0	0	0	0	0	0	0	0	0	0	0	0	0	0	0	0	0
ARMT1	0	0	0	0	0	0	0	0	0	0	0	0	0	0	0	0	0	0	0	0	0	0	11.5223	8.46301	0	0	0	0	0	0	0	0	0	0	0	0	0	9.08915	8.11267	0	0	0	0	0	0	0	0	0	0
ASL	0	0	0	0	0	0	0	0	0	0	0	0	0	0	0	0	0	0	0	0	0	0	12.5585	12.228	0	0	0	0	11.1253	11.3665	0	0	0	0	0	0	0	0	0	11.5726	0	11.9172	11.9347	0	11.8215	0	0	0	0
ATOX1	0	0	0	0	0	0	0	0	0	0	0	0	0	0	0	0	0	0	0	0	0	0	11.7766	10.5244	0	0	0	0	0	0	0	0	0	0	0	0	0	0	0	0	0	0	10.3591	0	8.62863	0	0	0	0
ATP6V1D	0	0	0	0	0	0	0	0	0	0	0	0	0	0	0	0	0	0	0	0	0	0	11.8628	12.49	0	0	0	0	0	0	0	0	0	0	0	0	0	11.1004	10.5097	0	0	0	0	0	0	0	0	0	0
BAX	0	0	0	0	0	0	0	0	0	0	0	0	0	0	0	0	0	0	0	0	0	0	12.1186	11.6764	0	0	0	0	0	0	0	0	0	0	10.4432	10.4539	0	0	0	0	0	0	11.925	0	11.1836	0	0	0	0
BCAM	0	0	0	0	0	0	0	0	0	0	0	0	0	0	0	0	0	0	0	0	0	0	10.2562	9.97486	0	0	0	10.6006	0	11.1736	0	0	0	0	8.8399	10.1942	0	0	0	10.6072	0	10.2323	0	0	0	0	0	0	0
BID	0	0	0	0	0	0	0	0	0	0	0	0	0	0	0	0	0	0	0	0	0	0	11.5621	10.0211	0	0	0	0	0	0	0	0	0	0	0	0	0	0	0	0	0	0	0	0	0	0	0	0	0
BLMH	0	0	0	0	0	0	0	0	0	0	0	0	0	0	0	0	0	0	0	0	0	0	12.9639	11.6918	0	0	0	0	0	0	0	0	0	0	0	0	0	8.79547	9.49072	0	0	0	11.8769	0	8.27566	0	0	0	0
BPNT1	0	0	0	0	0	0	0	0	0	0	0	0	0	0	0	0	0	0	0	0	0	0	12.3152	12.4722	0	0	0	0	0	0	0	0	0	0	0	0	0	0	0	0	0	0	11.4272	0	10.792	0	0	0	0
CARS1	0	0	0	0	0	0	0	0	0	0	0	0	0	0	0	0	0	0	0	0	0	0	10.4462	9.25834	0	0	0	0	0	0	0	0	0	0	0	0	0	0	0	0	0	0	0	0	0	0	0	0	0
CDK6	0	0	0	0	0	0	0	0	0	0	0	0	0	0	0	0	0	0	0	0	0	0	12.6213	9.7677	0	0	0	0	0	0	0	0	0	0	9.2277	8.84632	0	10.4629	7.99359	0	0	0	10.7912	0	7.45359	0	0	0	0
CES1	0	0	0	0	0	0	0	0	0	0	0	0	0	0	0	0	0	0	0	0	0	0	11.0078	10.5622	0	0	0	0	0	0	0	0	0	0	0	0	0	0	0	0	0	0	10.0786	0	10.2902	0	0	0	0
CHMP4A	0	0	0	0	0	0	0	0	0	0	0	0	0	0	0	0	0	0	0	0	0	0	11.3093	11.5041	0	0	0	0	0	0	0	0	0	0	0	0	0	0	0	0	0	0	0	0	0	0	0	0	0
CHORDC1	0	0	0	0	0	0	0	0	0	0	0	0	0	0	0	0	0	0	0	0	0	0	15.9221	15.4518	0	0	0	0	0	0	0	0	0	0	0	0	0	0	0	0	0	0	15.5512	12.448	14.8703	0	0	0	0
CIAPIN1	0	0	0	0	0	0	0	0	0	0	0	0	0	0	0	0	0	0	0	0	0	0	10.2664	10.6451	0	0	0	0	0	0	0	0	0	0	0	0	0	0	0	0	0	0	10.0516	0	10.5363	0	0	0	0
COPS2	0	0	0	0	0	0	0	0	0	0	0	0	0	0	0	0	0	0	0	0	0	0	11.6221	11.0465	0	0	0	0	0	0	0	0	0	0	0	0	0	11.1533	9.53085	0	0	0	0	0	0	0	0	0	0
COPS5	0	0	0	0	0	0	0	0	0	0	0	0	0	0	0	0	0	0	0	0	0	0	10.9878	9.49714	0	0	0	0	0	0	0	0	0	0	0	0	0	9.94313	9.91022	0	0	0	0	0	0	0	0	0	0
COPS6	0	0	0	0	0	0	0	0	0	0	0	0	0	0	0	0	0	0	0	0	0	0	11.6011	11.2591	0	0	0	0	0	0	0	0	0	0	8.60755	9.54011	0	11.056	10.0758	0	0	0	10.3541	0	9.22576	0	0	0	0
CPOX	0	0	0	0	0	0	0	0	0	0	0	0	0	0	0	0	0	0	0	0	0	0	10.6432	10.1711	0	0	0	0	0	0	0	0	0	0	0	0	0	10.1298	10.0835	0	0	0	0	0	0	0	0	0	0
CPPED1	0	0	0	0	0	0	0	0	0	0	0	0	0	0	0	0	0	0	0	0	0	0	11.6958	11.6802	0	0	0	0	0	0	0	0	0	0	0	0	0	0	0	0	0	0	0	0	0	0	0	0	0
CRK	0	0	0	0	0	0	0	0	0	0	0	0	0	0	0	0	0	0	0	0	0	0	11.6407	10.3491	0	0	0	0	0	0	0	0	0	0	0	0	0	0	0	0	0	0	0	0	0	0	0	0	0
CRLF3	0	0	0	0	0	0	0	0	0	0	0	0	0	0	0	0	0	0	0	0	0	0	9.96321	8.67523	0	0	0	0	0	0	0	0	0	0	0	0	0	0	0	0	0	0	0	0	0	0	0	0	0
CUL1	0	0	0	0	0	0	0	0	0	0	0	0	0	0	0	0	0	0	0	0	0	0	10.5207	9.79576	0	0	0	0	0	0	0	0	0	0	11.1708	10.9971	0	11.0258	10.5054	11.0861	0	10.5969	11.3864	0	10.2567	0	0	0	0
CUL4B	0	0	0	0	0	0	0	0	0	0	0	0	0	0	0	0	0	0	0	0	0	0	10.0649	9.18829	0	0	0	0	0	0	0	0	0	0	0	0	0	0	0	0	0	0	0	0	0	0	0	0	0
CUTA	0	0	0	0	0	0	0	0	0	0	0	0	0	0	0	0	0	0	0	0	0	0	13.0942	12.2262	0	0	0	0	0	0	0	0	0	0	0	0	0	0	0	0	0	0	0	0	0	0	0	0	0
CYRIB	0	0	0	0	0	0	0	0	0	0	0	0	0	0	0	0	0	0	0	0	0	0	11.6575	11.1626	0	0	0	0	0	0	0	0	0	0	0	0	0	0	0	0	0	0	11.4419	0	9.91661	0	0	0	0
DAPK3	0	0	0	0	0	0	0	0	0	0	0	0	0	0	0	0	0	0	0	0	0	0	9.81325	10.7533	0	0	0	0	0	0	0	0	0	0	0	0	0	0	0	0	0	0	0	0	0	0	0	0	0
DBI	0	0	0	0	0	0	0	0	0	0	0	0	0	0	0	0	0	0	0	0	0	0	14.7155	14.3856	0	0	0	0	0	0	0	0	0	0	0	0	0	0	0	0	0	0	0	0	0	0	0	0	0
DCPS	0	0	0	0	0	0	0	0	0	0	0	0	0	0	0	0	0	0	0	0	0	0	11.4016	10.4099	0	0	0	0	0	0	0	0	0	0	0	0	0	0	0	0	0	0	0	0	0	0	0	0	0
DDT	0	0	0	0	0	0	0	0	0	0	0	0	0	0	0	0	0	0	0	0	0	0	12.3893	11.695	0	0	0	0	0	0	0	0	0	0	0	0	0	10.5709	9.67391	0	0	0	11.0913	0	9.13236	0	0	0	0
DERA	0	0	0	0	0	0	0	0	0	0	0	0	0	0	0	0	0	0	0	0	0	0	11.4544	11.2214	0	0	0	0	0	0	0	0	0	0	0	0	0	0	0	0	0	0	11.5595	0	10.0932	0	0	0	0
DFFA	0	0	0	0	0	0	0	0	0	0	0	0	0	0	0	0	0	0	0	0	0	0	12.6019	11.6411	0	0	0	0	0	0	0	0	0	0	0	0	0	11.5143	10.142	0	0	0	0	0	0	0	0	0	0
DHFR	0	0	0	0	0	0	0	0	0	0	0	0	0	0	0	0	0	0	0	0	0	0	10.3735	11.7602	0	0	0	0	0	0	0	0	0	0	10.9583	10.1693	0	0	0	0	0	0	0	0	0	0	0	0	0
DNAAF5	0	0	0	0	0	0	0	0	0	0	0	0	0	0	0	0	0	0	0	0	0	0	9.76975	9.19187	0	0	0	0	0	0	0	0	0	0	0	0	0	0	0	0	0	0	0	0	0	0	0	0	0
DNPEP	0	0	0	0	0	0	0	0	0	0	0	0	0	0	0	0	0	0	0	0	0	0	10.92	9.10588	0	0	0	0	0	0	0	0	0	0	0	0	0	0	0	0	0	0	0	0	0	0	0	0	0
DPYSL3	0	0	0	0	0	0	0	0	0	0	0	0	0	0	0	0	0	0	0	0	0	0	10.8809	9.08576	0	0	0	0	0	0	0	0	0	0	0	0	0	0	0	0	0	0	0	0	0	0	0	0	0
DUSP3	0	0	0	0	0	0	0	0	0	0	0	0	0	0	0	0	0	0	0	0	0	0	10.95	10.4586	0	0	0	9.37814	7.52003	9.14854	0	0	0	0	0	0	0	0	0	0	0	0	12.7695	0	10.9235	0	0	0	0
DUT	0	0	0	0	0	0	0	0	0	0	0	0	0	0	0	0	0	0	0	0	0	0	11.8163	11.6014	0	0	0	0	0	0	0	0	0	0	0	0	0	0	0	0	0	0	10.8897	0	9.97148	0	0	0	0
EIPR1	0	0	0	0	0	0	0	0	0	0	0	0	0	0	0	0	0	0	0	0	0	0	10.1327	10.5631	0	0	0	0	0	0	0	0	0	0	10.1355	10.6586	0	9.27707	10.0153	0	0	0	0	0	0	0	0	0	0
ENOPH1	0	0	0	0	0	0	0	0	0	0	0	0	0	0	0	0	0	0	0	0	0	0	11.0047	10.4541	0	0	0	0	0	0	0	0	0	0	0	0	0	9.19422	8.47905	0	0	0	9.29775	0	8.18237	0	0	0	0
EXOSC4	0	0	0	0	0	0	0	0	0	0	0	0	0	0	0	0	0	0	0	0	0	0	8.83878	10.0315	0	0	0	10.5239	8.66384	10.3573	0	0	0	0	0	0	0	0	0	0	0	0	10.4511	0	10.2469	0	0	0	0
FADD	0	0	0	0	0	0	0	0	0	0	0	0	0	0	0	0	0	0	0	0	0	0	11.204	10.4395	0	0	0	0	0	0	0	0	0	0	0	0	0	0	0	0	0	0	0	0	0	0	0	0	0
FAHD1	0	0	0	0	0	0	0	0	0	0	0	0	0	0	0	0	0	0	0	0	0	0	9.87104	9.51562	0	0	0	0	0	0	0	0	0	0	0	0	0	0	0	0	0	0	0	0	0	0	0	0	0
FAM118A	0	0	0	0	0	0	0	0	0	0	0	0	0	0	0	0	0	0	0	0	0	0	9.82106	8.94122	0	0	0	0	0	0	0	0	0	0	0	0	0	10.6066	9.55943	0	0	0	0	0	0	0	0	0	0
FASN	0	0	0	0	0	0	0	0	0	0	0	0	0	0	0	0	0	0	0	0	0	0	15.4481	15.3095	0	0	0	0	0	0	0	0	0	0	0	0	0	0	0	0	0	0	0	0	0	0	0	0	0
FBXO22	0	0	0	0	0	0	0	0	0	0	0	0	0	0	0	0	0	0	0	0	0	0	11.5327	10.6207	0	0	0	0	0	0	0	0	0	0	0	0	0	0	0	0	0	0	0	0	0	0	0	0	0
FDX1	0	0	0	0	0	0	0	0	0	0	0	0	0	0	0	0	0	0	0	0	0	0	9.65033	9.09428	0	0	0	0	0	0	0	0	0	0	0	0	0	0	0	0	0	0	0	0	0	0	0	0	0
FKBP1A	0	0	0	0	0	0	0	0	0	0	0	0	0	0	0	0	0	0	0	0	0	0	12.8982	12.119	0	0	0	0	0	0	0	0	0	0	0	0	0	0	0	0	0	0	11.0904	0	9.06622	0	0	0	0
FKBP4	0	0	0	0	0	0	0	0	0	0	0	0	0	0	0	0	0	0	0	0	0	0	15.2838	15.0173	0	0	0	0	0	0	0	0	0	0	0	0	0	0	0	0	0	0	0	0	0	0	0	0	0
FKBP5	0	0	0	0	0	0	0	0	0	0	0	0	0	0	0	0	0	0	0	0	0	0	10.4507	10.0282	0	0	0	0	0	0	0	0	0	0	0	0	0	10.3575	9.82709	0	0	0	0	0	0	0	0	0	0
FN3K	0	0	0	0	0	0	0	0	0	0	0	0	0	0	0	0	0	0	0	0	0	0	10.5201	9.72068	0	0	0	0	0	0	0	0	0	0	10.8147	9.42392	0	0	0	0	0	0	0	0	0	0	0	0	0
FOXK1	0	0	0	0	0	0	0	0	0	0	0	0	0	0	0	0	0	0	0	0	0	0	10.6746	8.92184	0	0	0	9.05727	0	8.15623	0	0	0	0	0	0	0	0	0	0	0	0	0	0	0	0	0	0	0
GALE	0	0	0	0	0	0	0	0	0	0	0	0	0	0	0	0	0	0	0	0	0	0	11.5025	10.6124	0	0	0	0	0	0	0	0	0	0	0	0	0	0	0	0	0	0	10.2074	0	9.34357	0	0	0	0
GALK1	0	0	0	0	0	0	0	0	0	0	0	0	0	0	0	0	0	0	0	0	0	0	11.0059	10.8079	0	0	0	0	0	0	0	0	0	0	0	0	0	0	0	0	0	0	0	0	0	0	0	0	0
GAMT	0	0	0	0	0	0	0	0	0	0	0	0	0	0	0	0	0	0	0	0	0	0	11.6844	9.92684	0	0	0	0	0	0	0	0	0	0	0	0	0	0	0	0	0	0	0	0	0	0	0	0	0
GAS2	0	0	0	0	0	0	0	0	0	0	0	0	0	0	0	0	0	0	0	0	0	0	10.4721	9.35835	0	0	0	0	0	0	0	0	0	0	0	0	0	0	0	0	0	0	0	0	0	0	0	0	0
GCSH	0	0	0	0	0	0	0	0	0	0	0	0	0	0	0	0	0	0	0	0	0	0	12.1576	11.0289	0	0	0	0	0	0	0	0	0	0	0	0	0	0	0	0	0	0	0	0	0	0	0	0	0
GFUS	0	0	0	0	0	0	0	0	0	0	0	0	0	0	0	0	0	0	0	0	0	0	10.8178	9.91807	0	0	0	0	0	0	0	0	0	0	0	0	0	0	0	0	0	0	0	0	0	0	0	0	0
GIPC1	0	0	0	0	0	0	0	0	0	0	0	0	0	0	0	0	0	0	0	0	0	0	9.60695	9.96995	0	0	0	0	0	0	0	0	0	0	0	0	0	9.7732	9.25428	0	0	0	0	0	0	0	0	0	0
GLMN	0	0	0	0	0	0	0	0	0	0	0	0	0	0	0	0	0	0	0	0	0	0	11.0482	9.71794	0	0	0	0	0	0	0	0	0	0	0	0	0	10.5627	9.71922	0	0	0	0	0	0	0	0	0	0
GLO1	0	0	0	0	0	0	0	0	0	0	0	0	0	0	0	0	0	0	0	0	0	0	14.6381	13.7485	0	0	0	0	0	0	0	0	0	0	0	0	0	0	0	0	0	0	0	0	0	0	0	0	0
GLOD4	0	0	0	0	0	0	0	0	0	0	0	0	0	0	0	0	0	0	0	0	0	0	10.2563	11.0264	0	0	0	0	0	0	0	0	0	0	0	0	0	0	0	0	0	0	0	0	0	0	0	0	0
GNA13	0	0	0	0	0	0	0	0	0	0	0	0	0	0	0	0	0	0	0	0	0	0	10.8568	9.90272	0	0	0	0	0	0	0	0	0	0	0	0	0	11.8204	11.3258	10.3634	0	10.497	0	0	0	0	0	0	0
GNG5	0	0	0	0	0	0	0	0	0	0	0	0	0	0	0	0	0	0	0	0	0	0	11.9943	10.9846	0	0	0	0	0	0	0	0	0	0	0	0	0	0	0	0	0	0	0	0	0	0	0	0	0
GON7	0	0	0	0	0	0	0	0	0	0	0	0	0	0	0	0	0	0	0	0	0	0	11.4694	8.02142	0	0	0	0	0	0	0	0	0	0	0	0	0	8.91643	7.47119	0	0	0	0	0	0	0	0	0	0
GPS1	0	0	0	0	0	0	0	0	0	0	0	0	0	0	0	0	0	0	0	0	0	0	10.0737	8.51438	0	0	0	0	0	0	0	0	0	0	0	0	0	10.9446	9.00656	0	0	0	0	0	0	0	0	0	0
GRB2	0	0	0	0	0	0	0	0	0	0	0	0	0	0	0	0	0	0	0	0	0	0	11.1012	11.2769	0	0	0	0	0	0	0	0	0	0	0	0	0	0	0	0	0	0	0	0	0	0	0	0	0
GRHPR	0	0	0	0	0	0	0	0	0	0	0	0	0	0	0	0	0	0	0	0	0	0	10.1743	11.5887	0	0	0	0	0	0	0	0	0	0	0	0	0	0	0	0	0	0	0	0	0	0	0	0	0
GYG1	0	0	0	0	0	0	0	0	0	0	0	0	0	0	0	0	0	0	0	0	0	0	11.569	11.2089	0	0	0	0	0	0	0	0	0	0	10.5958	10.3652	0	0	0	0	0	0	12.2625	0	10.7044	0	0	0	0
HIKESHI	0	0	0	0	0	0	0	0	0	0	0	0	0	0	0	0	0	0	0	0	0	0	9.342	11.3589	0	0	0	0	0	0	0	0	0	0	0	0	0	0	0	0	0	0	0	0	0	0	0	0	0
HMGCS1	0	0	0	0	0	0	0	0	0	0	0	0	0	0	0	0	0	0	0	0	0	0	15.1822	15.5948	0	0	0	0	0	0	0	0	0	0	0	0	0	0	0	0	0	0	15.568	0	14.9453	0	0	0	0
HNRNPK	0	0	0	0	0	0	0	0	0	0	0	0	0	0	0	0	0	0	0	0	0	0	12.6111	12.4256	0	0	0	0	0	0	0	0	0	0	12.5844	11.8264	0	0	0	0	0	0	0	0	0	0	0	0	0
HPDL	0	0	0	0	0	0	0	0	0	0	0	0	0	0	0	0	0	0	0	0	0	0	11.5812	11.9243	0	0	0	0	0	0	0	0	0	0	0	0	0	0	0	0	0	0	12.1859	0	11.0455	0	0	0	0
HSP90AA4P	0	0	0	0	0	0	0	0	0	0	0	0	0	0	0	0	0	0	0	0	0	0	12.6058	11.2441	0	0	0	0	0	0	0	0	0	0	10.4888	9.63777	0	0	0	0	0	0	0	0	0	0	0	0	0
HSPH1	0	0	0	0	0	0	0	0	0	0	0	0	0	0	0	0	0	0	0	0	0	0	14.6022	14.1897	0	0	0	0	0	0	0	0	0	0	0	0	0	0	0	0	0	0	0	0	0	0	0	0	0
IARS2	0	0	0	0	0	0	0	0	0	0	0	0	0	0	0	0	0	0	0	0	0	0	12.2665	10.8374	0	0	0	0	0	0	0	0	0	0	0	0	0	0	0	0	0	0	11.5713	0	10.6108	0	0	0	0
IDH2	0	0	0	0	0	0	0	0	0	0	0	0	0	0	0	0	0	0	0	0	0	0	10.0643	9.71193	0	0	0	0	0	0	0	0	0	0	0	0	0	9.95197	8.9921	8.29905	0	10.0773	9.53697	0	10.056	0	0	0	0
IMPDH2	0	0	0	0	0	0	0	0	0	0	0	0	0	0	0	0	0	0	0	0	0	0	14.0594	13.2974	0	0	0	0	0	0	0	0	0	0	0	0	0	0	0	0	0	0	0	0	0	0	0	0	0
ITPA	0	0	0	0	0	0	0	0	0	0	0	0	0	0	0	0	0	0	0	0	0	0	10.3777	10.3954	0	0	0	0	0	0	0	0	0	0	0	0	0	0	0	0	0	0	0	0	0	0	0	0	0
JPT1	0	0	0	0	0	0	0	0	0	0	0	0	0	0	0	0	0	0	0	0	0	0	11.6078	11.3065	0	0	0	0	0	0	0	0	0	0	0	0	0	0	0	0	0	0	0	0	0	0	0	0	0
KLC1	0	0	0	0	0	0	0	0	0	0	0	0	0	0	0	0	0	0	0	0	0	0	11.4192	9.64834	0	0	0	0	0	0	0	0	0	0	0	0	0	0	0	0	0	0	0	0	0	0	0	0	0
LONP1	0	0	0	0	0	0	0	0	0	0	0	0	0	0	0	0	0	0	0	0	0	0	9.8573	9.38463	0	0	0	0	0	0	0	0	0	0	0	0	0	0	0	0	0	0	0	0	0	0	0	0	0
LSM8	0	0	0	0	0	0	0	0	0	0	0	0	0	0	0	0	0	0	0	0	0	0	12.4007	11.7231	0	0	0	0	0	0	0	0	0	0	0	0	0	0	0	0	0	0	0	0	0	0	0	0	0
LYPLA2	0	0	0	0	0	0	0	0	0	0	0	0	0	0	0	0	0	0	0	0	0	0	10.3688	10.0656	0	0	0	0	0	0	0	0	0	0	0	0	0	0	0	0	0	0	0	0	0	0	0	0	0
MAGOHB	0	0	0	0	0	0	0	0	0	0	0	0	0	0	0	0	0	0	0	0	0	0	10.1185	9.39485	0	0	0	0	0	0	0	0	0	0	0	0	0	10.8874	9.50802	0	0	0	0	0	0	0	0	0	0
MAPK3	0	0	0	0	0	0	0	0	0	0	0	0	0	0	0	0	0	0	0	0	0	0	10.9323	9.72562	0	0	0	0	0	0	0	0	0	0	0	0	0	0	0	0	0	0	0	0	0	0	0	0	0
MEAK7	0	0	0	0	0	0	0	0	0	0	0	0	0	0	0	0	0	0	0	0	0	0	11.9127	10.4114	0	0	0	0	0	0	0	0	0	0	0	0	0	11.1398	11.2815	0	0	0	0	0	0	0	0	0	0
MINDY1	0	0	0	0	0	0	0	0	0	0	0	0	0	0	0	0	0	0	0	0	0	0	12.1038	12.2829	0	0	0	0	0	0	0	0	0	0	0	0	0	0	0	13.2215	0	13.2831	12.942	0	12.9529	0	0	0	0
MPZL1	0	0	0	0	0	0	0	0	0	0	0	0	0	0	0	0	0	0	0	0	0	0	8.74212	9.00907	0	0	0	0	0	0	0	0	0	0	0	0	0	0	0	0	0	0	0	0	0	0	0	0	0
MRE11	0	0	0	0	0	0	0	0	0	0	0	0	0	0	0	0	0	0	0	0	0	0	10.1579	9.32519	0	0	0	0	0	0	0	0	0	0	10.791	10.508	0	10.6325	10.5417	0	0	0	0	0	0	0	0	0	0
MYG1	0	0	0	0	0	0	0	0	0	0	0	0	0	0	0	0	0	0	0	0	0	0	12.0779	11.3217	0	0	0	0	0	0	0	0	0	0	0	0	0	0	0	0	0	0	11.2805	0	10.933	0	0	0	0
NAA25	0	0	0	0	0	0	0	0	0	0	0	0	0	0	0	0	0	0	0	0	0	0	9.85901	8.53312	0	0	0	0	0	0	0	0	0	0	0	0	0	0	0	0	0	0	0	0	0	0	0	0	0
NAE1	0	0	0	0	0	0	0	0	0	0	0	0	0	0	0	0	0	0	0	0	0	0	10.2922	11.1128	0	0	0	0	0	0	0	0	0	0	0	0	0	0	0	0	0	0	9.58839	0	9.86071	0	0	0	0
NANS	0	0	0	0	0	0	0	0	0	0	0	0	0	0	0	0	0	0	0	0	0	0	11.2541	11.1628	0	0	0	0	0	0	0	0	0	0	0	0	0	0	0	0	0	0	0	0	0	0	0	0	0
NAXE	0	0	0	0	0	0	0	0	0	0	0	0	0	0	0	0	0	0	0	0	0	0	12.3817	9.62539	0	0	0	0	0	0	0	0	0	0	0	0	0	0	0	0	0	0	9.49598	0	10.5759	0	0	0	0
NDRG1	0	0	0	0	0	0	0	0	0	0	0	0	0	0	0	0	0	0	0	0	0	0	9.71529	10.1259	0	0	0	0	0	0	0	0	0	0	0	0	0	0	0	0	0	0	0	0	0	0	0	0	0
NDRG2	0	0	0	0	0	0	0	0	0	0	0	0	0	0	0	0	0	0	0	0	0	0	10.8234	9.8282	0	0	0	0	0	0	0	0	0	0	0	0	0	0	0	0	0	0	0	0	0	0	0	0	0
NDRG3	0	0	0	0	0	0	0	0	0	0	0	0	0	0	0	0	0	0	0	0	0	0	12.7043	12.5092	0	0	0	0	0	0	0	0	0	0	0	0	0	9.68489	10.6897	0	0	0	0	0	0	0	0	0	0
NDUFAB1	0	0	0	0	0	0	0	0	0	0	0	0	0	0	0	0	0	0	0	0	0	0	12.2811	11.3782	0	0	0	0	0	0	0	0	0	0	0	0	0	11.8744	12.0229	0	0	0	0	0	0	0	0	0	0
NIT2	0	0	0	0	0	0	0	0	0	0	0	0	0	0	0	0	0	0	0	0	0	0	12.4091	11.8976	0	0	0	0	0	0	0	0	0	0	0	0	0	11.3404	10.4337	0	0	0	0	0	0	0	0	0	0
NT5DC1	0	0	0	0	0	0	0	0	0	0	0	0	0	0	0	0	0	0	0	0	0	0	10.5899	10.0527	0	0	0	0	0	0	0	0	0	0	0	0	0	0	0	0	0	0	10.3873	0	8.71418	0	0	0	0
NUCB1	0	0	0	0	0	0	0	0	0	0	0	0	0	0	0	0	0	0	0	0	0	0	11.1611	9.6035	0	0	0	0	0	0	0	0	0	0	0	0	0	10.5053	8.59076	0	0	0	0	0	0	0	0	0	0
NUCB2	0	0	0	0	0	0	0	0	0	0	0	0	0	0	0	0	0	0	0	0	0	0	10.0417	9.80039	0	0	0	0	0	0	0	0	0	0	0	0	0	0	0	0	0	0	0	0	0	0	0	0	0
NUDT4	0	0	0	0	0	0	0	0	0	0	0	0	0	0	0	0	0	0	0	0	0	0	11.3772	10.6556	0	0	0	0	0	0	0	0	0	0	0	0	0	9.45854	8.25423	0	0	0	9.6598	0	8.18646	0	0	0	0
OXSR1	0	0	0	0	0	0	0	0	0	0	0	0	0	0	0	0	0	0	0	0	0	0	11.4079	10.845	0	0	0	0	0	0	0	0	0	0	0	0	0	0	0	0	0	0	10.9639	0	8.31042	0	0	0	0
PAFAH1B3	0	0	0	0	0	0	0	0	0	0	0	0	0	0	0	0	0	0	0	0	0	0	10.4887	8.64875	0	0	0	0	0	0	0	0	0	0	0	0	0	0	0	0	0	0	0	0	0	0	0	0	0
PAPSS1	0	0	0	0	0	0	0	0	0	0	0	0	0	0	0	0	0	0	0	0	0	0	11.6799	9.236	0	0	0	0	0	0	0	0	0	0	0	0	0	9.67509	9.18761	0	0	0	9.76094	0	8.96885	0	0	0	0
PCK2	0	0	0	0	0	0	0	0	0	0	0	0	0	0	0	0	0	0	0	0	0	0	13.2604	12.7618	0	0	0	0	0	0	0	0	0	0	0	0	0	0	0	0	0	0	0	0	0	0	0	0	0
PCYT2	0	0	0	0	0	0	0	0	0	0	0	0	0	0	0	0	0	0	0	0	0	0	11.4692	10.6434	0	0	0	0	0	0	0	0	0	0	0	0	0	0	0	0	0	0	0	0	0	0	0	0	0
PDHA1	0	0	0	0	0	0	0	0	0	0	0	0	0	0	0	0	0	0	0	0	0	0	9.22206	9.47157	0	0	0	12.1074	0	11.4561	0	0	0	0	11.1043	11.0868	0	12.8218	13.6276	9.78139	0	9.85615	0	0	0	0	0	0	0
PFDN2	0	0	0	0	0	0	0	0	0	0	0	0	0	0	0	0	0	0	0	0	0	0	11.357	11.4001	0	0	0	0	0	0	0	0	0	0	0	0	0	0	0	0	0	0	0	0	0	0	0	0	0
PFDN4	0	0	0	0	0	0	0	0	0	0	0	0	0	0	0	0	0	0	0	0	0	0	10.9761	11.0111	0	0	0	0	0	0	0	0	0	0	0	0	0	9.8598	9.50349	0	0	0	0	0	0	0	0	0	0
PFDN5	0	0	0	0	0	0	0	0	0	0	0	0	0	0	0	0	0	0	0	0	0	0	9.86483	11.735	0	0	0	0	0	0	0	0	0	0	0	0	0	0	0	0	0	0	0	0	0	0	0	0	0
PFDN6	0	0	0	0	0	0	0	0	0	0	0	0	0	0	0	0	0	0	0	0	0	0	10.949	10.9559	0	0	0	0	0	0	0	0	0	0	0	0	0	9.59974	10.0851	0	0	0	0	0	0	0	0	0	0
PFKM	0	0	0	0	0	0	0	0	0	0	0	0	0	0	0	0	0	0	0	0	0	0	13.806	13.6468	0	0	0	0	0	0	0	0	0	0	0	0	0	0	0	0	0	0	0	0	0	0	0	0	0
PGLS	0	0	0	0	0	0	0	0	0	0	0	0	0	0	0	0	0	0	0	0	0	0	11.3453	10.7973	0	0	0	0	0	0	0	0	0	0	0	0	0	0	0	0	0	0	11.094	0	10.7672	0	0	0	0
PGM2	0	0	0	0	0	0	0	0	0	0	0	0	0	0	0	0	0	0	0	0	0	0	9.79162	9.4716	0	0	0	0	0	0	0	0	0	0	0	0	0	0	0	0	0	0	0	0	0	0	0	0	0
PGM3	0	0	0	0	0	0	0	0	0	0	0	0	0	0	0	0	0	0	0	0	0	0	10.9875	10.6613	0	0	0	0	0	0	0	0	0	0	0	0	0	0	0	0	0	0	0	0	0	0	0	0	0
PGP	0	0	0	0	0	0	0	0	0	0	0	0	0	0	0	0	0	0	0	0	0	0	9.9246	9.62538	0	0	0	0	0	0	0	0	0	0	0	0	0	8.946	7.77403	0	0	0	0	0	0	0	0	0	0
PGRMC2	0	0	0	0	0	0	0	0	0	0	0	0	0	0	0	0	0	0	0	0	0	0	13.244	11.6489	0	0	0	13.8482	8.77304	12.3387	0	0	0	0	13.2614	12.8185	0	12.9122	14.6391	0	0	0	0	0	0	0	0	0	0
PLIN2	0	0	0	0	0	0	0	0	0	0	0	0	0	0	0	0	0	0	0	0	0	0	11.7417	10.8661	0	0	0	0	0	0	0	0	0	0	0	0	0	0	0	0	0	0	9.79579	0	9.41043	0	0	0	0
POMP	0	0	0	0	0	0	0	0	0	0	0	0	0	0	0	0	0	0	0	0	0	0	9.48966	9.31739	0	0	0	0	0	0	0	0	0	0	0	0	0	0	0	0	0	0	0	0	0	0	0	0	0
PPAT	0	0	0	0	0	0	0	0	0	0	0	0	0	0	0	0	0	0	0	0	0	0	11.6925	10.7813	0	0	0	0	0	0	0	0	0	0	0	0	0	0	0	0	0	0	11.2596	0	9.55056	0	0	0	0
PPP1R12A	0	0	0	0	0	0	0	0	0	0	0	0	0	0	0	0	0	0	0	0	0	0	12.1373	10.6257	0	0	0	0	0	0	0	0	0	0	0	0	0	0	0	0	0	0	11.2255	0	9.73235	0	0	0	0
PPP1R7	0	0	0	0	0	0	0	0	0	0	0	0	0	0	0	0	0	0	0	0	0	0	11.2248	10.9696	0	0	0	0	0	0	0	0	0	0	0	0	0	0	0	0	0	0	0	0	0	0	0	0	0
PPP2R5D	0	0	0	0	0	0	0	0	0	0	0	0	0	0	0	0	0	0	0	0	0	0	11.2092	9.00353	0	0	0	0	0	0	0	0	0	0	0	0	0	8.90576	8.79386	0	0	0	0	0	0	0	0	0	0
PRKCSH	0	0	0	0	0	0	0	0	0	0	0	0	0	0	0	0	0	0	0	0	0	0	14.4086	15.133	0	0	0	0	0	0	0	0	0	0	0	0	0	0	0	0	0	0	0	0	0	0	0	0	0
PSAP	0	0	0	0	0	0	0	0	0	0	0	0	0	0	0	0	0	0	0	0	0	0	12.2597	11.8225	0	0	0	0	0	0	0	0	0	0	0	0	0	9.5445	8.87971	0	0	0	0	0	0	0	0	0	0
PSME2	0	0	0	0	0	0	0	0	0	0	0	0	0	0	0	0	0	0	0	0	0	0	14.0532	13.9287	0	0	0	0	0	0	0	0	0	0	0	0	0	0	0	0	0	0	0	0	0	0	0	0	0
PTGR1	0	0	0	0	0	0	0	0	0	0	0	0	0	0	0	0	0	0	0	0	0	0	14.4076	13.0437	0	0	0	0	0	0	0	0	0	0	0	0	0	0	0	0	0	0	14.2952	0	13.3029	0	0	0	0
PUS7	0	0	0	0	0	0	0	0	0	0	0	0	0	0	0	0	0	0	0	0	0	0	9.82119	10.6407	0	0	0	0	0	0	0	0	0	0	0	0	0	10.1729	9.27192	9.92223	0	9.634	10.4413	0	10.327	0	0	0	0
PXN	0	0	0	0	0	0	0	0	0	0	0	0	0	0	0	0	0	0	0	0	0	0	9.86797	9.45288	0	0	0	0	0	0	0	0	0	0	0	0	0	0	0	0	0	0	0	0	0	0	0	0	0
PYGB	0	0	0	0	0	0	0	0	0	0	0	0	0	0	0	0	0	0	0	0	0	0	10.7166	8.66573	0	0	0	0	0	0	0	0	0	0	0	0	0	9.20676	8.48882	0	0	0	0	0	0	0	0	0	0
RANBP3	0	0	0	0	0	0	0	0	0	0	0	0	0	0	0	0	0	0	0	0	0	0	10.735	11.1248	0	0	0	0	0	0	0	0	0	0	0	0	0	0	0	0	0	0	0	0	0	0	0	0	0
RBBP9	0	0	0	0	0	0	0	0	0	0	0	0	0	0	0	0	0	0	0	0	0	0	10.4175	8.26435	0	0	0	0	0	0	0	0	0	0	0	0	0	0	0	0	0	0	0	0	0	0	0	0	0
RBM8A	0	0	0	0	0	0	0	0	0	0	0	0	0	0	0	0	0	0	0	0	0	0	9.14868	9.99446	0	0	0	0	0	0	0	0	0	0	0	0	0	0	0	0	0	0	0	0	0	0	0	0	0
RIDA	0	0	0	0	0	0	0	0	0	0	0	0	0	0	0	0	0	0	0	0	0	0	12.6212	11.6061	0	0	0	0	0	0	0	0	0	0	0	0	0	0	0	0	0	0	11.1085	0	11.2249	0	0	0	0
RNF113A	0	0	0	0	0	0	0	0	0	0	0	0	0	0	0	0	0	0	0	0	0	0	9.48323	8.44739	0	0	0	0	0	0	0	0	0	0	0	0	0	0	0	0	0	0	0	0	0	0	0	0	0
RNF114	0	0	0	0	0	0	0	0	0	0	0	0	0	0	0	0	0	0	0	0	0	0	11.7233	12.192	0	0	0	10.6111	10.0983	10.6405	0	0	0	0	0	0	0	0	0	0	0	0	11.4757	0	12.6347	0	0	0	0
RNF214	0	0	0	0	0	0	0	0	0	0	0	0	0	0	0	0	0	0	0	0	0	0	9.61482	9.21074	0	0	0	0	0	0	0	0	0	0	0	0	0	0	0	0	0	0	0	0	0	0	0	0	0
RPIA	0	0	0	0	0	0	0	0	0	0	0	0	0	0	0	0	0	0	0	0	0	0	11.0939	10.4518	0	0	0	0	0	0	0	0	0	0	0	0	0	0	0	0	0	0	0	0	0	0	0	0	0
RTKN	0	0	0	0	0	0	0	0	0	0	0	0	0	0	0	0	0	0	0	0	0	0	11.1904	10.5332	0	0	0	0	0	0	0	0	0	0	0	0	0	0	0	10.3687	9.8445	8.84314	0	0	0	0	0	0	0
S100A14	0	0	0	0	0	0	0	0	0	0	0	0	0	0	0	0	0	0	0	0	0	0	7.88099	10.3636	0	0	0	13.507	0	12.0694	0	0	0	0	0	0	0	10.9377	9.15672	0	0	0	0	0	0	0	0	0	0
S100P	0	0	0	0	0	0	0	0	0	0	0	0	0	0	0	0	0	0	0	0	0	0	10.5067	8.92843	0	0	0	0	0	0	0	0	0	0	0	0	0	0	0	0	0	0	0	0	0	0	0	0	0
SCRN1	0	0	0	0	0	0	0	0	0	0	0	0	0	0	0	0	0	0	0	0	0	0	12.0884	11.4659	0	0	0	0	0	0	0	0	0	0	0	0	0	9.63353	9.01391	0	0	0	11.406	0	10.2749	0	0	0	0
SCYL2	0	0	0	0	0	0	0	0	0	0	0	0	0	0	0	0	0	0	0	0	0	0	9.60481	8.53953	0	0	0	0	0	0	0	0	0	0	0	0	0	10.3445	9.52184	0	0	0	0	0	0	0	0	0	0
SHTN1	0	0	0	0	0	0	0	0	0	0	0	0	0	0	0	0	0	0	0	0	0	0	11.1355	10.1041	0	0	0	0	0	0	0	0	0	0	0	0	0	0	0	0	0	0	0	0	0	0	0	0	0
SOD2	0	0	0	0	0	0	0	0	0	0	0	0	0	0	0	0	0	0	0	0	0	0	11.8883	11.7042	0	0	0	0	0	0	0	0	0	0	0	0	0	0	0	0	0	0	11.0424	0	10.4574	0	0	0	0
SPAG9	0	0	0	0	0	0	0	0	0	0	0	0	0	0	0	0	0	0	0	0	0	0	10.3774	8.99151	0	0	0	0	0	0	0	0	0	0	0	0	0	0	0	0	0	0	9.07915	0	9.19008	0	0	0	0
STRAP	0	0	0	0	0	0	0	0	0	0	0	0	0	0	0	0	0	0	0	0	0	0	13.9428	13.9049	0	0	0	0	0	0	0	0	0	0	0	0	0	0	0	0	0	0	0	0	0	0	0	0	0
SUCLG2	0	0	0	0	0	0	0	0	0	0	0	0	0	0	0	0	0	0	0	0	0	0	12.5926	10.9627	0	0	0	0	0	0	0	0	0	0	0	0	0	10.463	10.948	0	0	0	10.5071	0	11.6026	0	0	0	0
TIAL1	0	0	0	0	0	0	0	0	0	0	0	0	0	0	0	0	0	0	0	0	0	0	12.9708	12.3339	0	0	0	12.9196	12.7645	12.623	0	0	0	0	0	0	0	0	0	0	0	0	0	0	0	11.4363	11.6358	14.1588	0
TIGAR	0	0	0	0	0	0	0	0	0	0	0	0	0	0	0	0	0	0	0	0	0	0	11.6999	11.3228	0	0	0	0	0	0	0	0	0	0	0	0	0	0	0	0	0	0	10.7579	0	10.7344	0	0	0	0
TIPRL	0	0	0	0	0	0	0	0	0	0	0	0	0	0	0	0	0	0	0	0	0	0	10.3726	10.5087	0	0	0	0	0	0	0	0	0	0	0	0	0	0	0	0	0	0	0	0	0	0	0	0	0
TKFC	0	0	0	0	0	0	0	0	0	0	0	0	0	0	0	0	0	0	0	0	0	0	12.0836	10.6044	0	0	0	0	0	0	0	0	0	0	0	0	0	0	0	0	0	0	0	0	0	0	0	0	0
TP53I3	0	0	0	0	0	0	0	0	0	0	0	0	0	0	0	0	0	0	0	0	0	0	11.5663	9.69387	0	0	0	0	0	0	0	0	0	0	0	0	0	0	0	0	0	0	0	0	0	0	0	0	0
TPD52	0	0	0	0	0	0	0	0	0	0	0	0	0	0	0	0	0	0	0	0	0	0	11.3791	10.125	0	0	0	0	0	0	0	0	0	0	0	0	0	0	0	0	0	0	0	0	0	0	0	0	0
TRNT1	0	0	0	0	0	0	0	0	0	0	0	0	0	0	0	0	0	0	0	0	0	0	11.0007	9.30954	0	0	0	0	0	0	0	0	0	0	0	0	0	9.88375	9.12205	0	0	0	0	0	0	0	0	0	0
TSFM	0	0	0	0	0	0	0	0	0	0	0	0	0	0	0	0	0	0	0	0	0	0	10.1249	9.91773	0	0	0	0	0	0	0	0	0	0	0	0	0	0	0	0	0	0	0	0	0	0	0	0	0
TSNAX	0	0	0	0	0	0	0	0	0	0	0	0	0	0	0	0	0	0	0	0	0	0	11.698	10.8041	0	0	0	0	0	0	0	0	0	0	0	0	0	0	0	0	0	0	9.91256	0	9.21569	0	0	0	0
TYMS	0	0	0	0	0	0	0	0	0	0	0	0	0	0	0	0	0	0	0	0	0	0	11.1554	10.6089	0	0	0	0	0	0	0	0	0	0	0	0	0	0	0	0	0	0	0	0	0	0	0	0	0
UBA6	0	0	0	0	0	0	0	0	0	0	0	0	0	0	0	0	0	0	0	0	0	0	11.0179	9.49586	0	0	0	0	0	0	0	0	0	0	0	0	0	0	0	0	0	0	0	0	0	0	0	0	0
UBE2K	0	0	0	0	0	0	0	0	0	0	0	0	0	0	0	0	0	0	0	0	0	0	11.7072	11.896	0	0	0	0	0	0	0	0	0	0	0	0	0	0	0	0	0	0	11.8328	0	11.114	0	0	0	0
UBE2V2	0	0	0	0	0	0	0	0	0	0	0	0	0	0	0	0	0	0	0	0	0	0	9.78822	10.2677	0	0	0	0	0	0	0	0	0	0	0	0	0	0	0	0	0	0	0	0	0	0	0	0	0
UBE4A	0	0	0	0	0	0	0	0	0	0	0	0	0	0	0	0	0	0	0	0	0	0	11.7193	11.4847	0	0	0	11.1237	0	10.0566	0	0	0	0	0	0	0	10.5269	11.1518	12.2547	0	10.1347	11.005	0	10.6065	0	0	0	0
UBFD1	0	0	0	0	0	0	0	0	0	0	0	0	0	0	0	0	0	0	0	0	0	0	11.8109	12.173	0	0	0	0	0	0	0	0	0	0	0	0	0	0	0	0	0	0	0	0	0	0	0	0	0
UGGT1	0	0	0	0	0	0	0	0	0	0	0	0	0	0	0	0	0	0	0	0	0	0	12.5208	11.681	0	0	0	0	0	0	0	0	0	0	0	0	0	9.00162	8.46007	0	0	0	11.0189	0	9.15234	0	0	0	0
VBP1	0	0	0	0	0	0	0	0	0	0	0	0	0	0	0	0	0	0	0	0	0	0	11.0572	11.5938	0	0	0	0	0	0	0	0	0	0	0	0	0	0	0	0	0	0	0	0	0	0	0	0	0
VPS37B	0	0	0	0	0	0	0	0	0	0	0	0	0	0	0	0	0	0	0	0	0	0	10.0929	9.02752	0	0	0	0	0	0	0	0	0	0	0	0	0	0	0	0	0	0	0	0	0	0	0	0	0
WDR55	0	0	0	0	0	0	0	0	0	0	0	0	0	0	0	0	0	0	0	0	0	0	10.3259	8.78647	0	0	0	0	0	0	0	0	0	0	11.7262	9.5321	0	0	0	0	0	0	0	0	0	0	0	0	0
ZBTB8OS	0	0	0	0	0	0	0	0	0	0	0	0	0	0	0	0	0	0	0	0	0	0	9.76205	9.89213	0	0	0	0	0	0	0	0	0	0	0	0	0	0	0	0	0	0	0	0	0	0	0	0	0
ZPR1	0	0	0	0	0	0	0	0	0	0	0	0	0	0	0	0	0	0	0	0	0	0	10.421	9.94103	0	0	0	0	0	0	0	0	0	0	0	0	0	0	0	0	0	0	0	0	0	0	0	0	0
ABCB1	0	0	0	0	0	0	0	0	0	0	0	0	0	0	0	0	0	0	0	0	0	0	0	0	9.86406	7.33065	0	9.25621	0	8.11335	0	0	0	0	0	0	0	0	0	0	0	0	0	0	0	0	0	0	0
ATP5F1D	0	0	0	0	0	0	0	0	0	0	0	0	0	0	0	0	0	0	0	0	0	0	0	0	11.123	9.4973	8.05061	16.1549	12.088	15.1658	0	0	0	0	0	0	0	11.7208	12.4275	0	0	0	0	0	0	0	0	0	0
ATP6V0D1	0	0	0	0	0	0	0	0	0	0	0	0	0	0	0	0	0	0	0	0	0	0	0	0	9.87638	8.21144	0	11.0753	0	7.2075	0	0	0	0	0	0	0	0	0	0	0	0	0	0	0	0	0	0	0
CIAO2B	0	0	0	0	0	0	0	0	0	0	0	0	0	0	0	0	0	0	0	0	0	0	0	0	12.2527	12.3173	11.9013	0	0	0	0	0	0	0	0	0	0	0	0	0	0	0	0	0	0	0	0	0	0
DIABLO	0	0	0	0	0	0	0	0	0	0	0	0	0	0	0	0	0	0	0	0	0	0	0	0	19.1065	18.9389	18.5066	0	0	0	0	0	0	0	0	0	0	0	0	0	0	0	0	0	0	0	0	0	17.9815
DNAJA2	0	0	0	0	0	0	0	0	0	0	0	0	0	0	0	0	0	0	0	0	0	0	0	0	14.108	13.8162	13.6568	0	0	0	0	0	0	0	0	0	14.4401	13.525	13.8556	0	0	0	0	0	0	0	0	0	0
DNAJC1	0	0	0	0	0	0	0	0	0	0	0	0	0	0	0	0	0	0	0	0	0	0	0	0	11.4947	9.69035	0	0	0	0	0	0	0	0	0	0	0	10.233	10.4681	0	0	0	0	0	0	0	0	0	0
GPR89A	0	0	0	0	0	0	0	0	0	0	0	0	0	0	0	0	0	0	0	0	0	0	0	0	9.40103	7.49514	0	9.2724	0	7.52732	0	0	0	0	0	0	0	0	0	0	0	0	0	0	0	0	0	0	0
HNRNPH1	0	0	0	0	0	0	0	0	0	0	0	0	0	0	0	0	0	0	0	0	0	0	0	0	17.2329	17.3824	17.5117	17.6522	17.327	17.6092	0	0	0	0	0	0	0	0	0	0	0	0	0	0	0	0	0	0	0
[truncated: 419 more rows]
[truncated: 80 more columns]
